# Supplementary material for: Exploring the origins of selectivity in soluble epoxide hydrolase from Bacillus megaterium
Source: PubMed Central journal article supplement — Org Biomol Chem. 2017 Oct 11;15(41):8827–35. doi: 10.1039/c7ob01847a (PMC5708342; doi:10.1039/c7ob01847a), 2017-10-11
Supplement: OB-015-C7OB01847A-s001.pdf [file OB-015-C7OB01847A-s001.pdf]

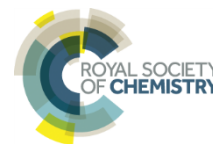

## Organic & Biomolecular Chemistry

### SUPPORTING INFORMATION

#### **Exploring the origins of selectivity in soluble Epoxide Hydrolase from *Bacillus megaterium***

Eila Serrano-Hervás,<sup>a</sup> Marc Garcia-Borràs<sup>\*b</sup> and Sílvia Osuna<sup>\*a</sup>

### SUPPORTING INFORMATION

### Computational methods

Full geometry optimizations were performed with the hybrid DFT B3LYP functional<sup>1, 2</sup> and the 6-31G(d) basis set<sup>3, 4</sup> using Gaussian 09,<sup>5</sup> a widely accepted level of theory for studying mechanisms of organic reactions.<sup>6, 7</sup> The effects of the active site environment of the protein were implicitly included in all calculations using the Conductor-like Polarizable Continuum Model (CPCM)<sup>8, 9</sup> with diethyl ether as the solvent ( $\epsilon=4$ ). The transition states (TS) were located by using a Bofill update TS search on a reduced potential energy surface.<sup>10</sup> Analytical frequency calculations were performed at the same level of theory as the geometry optimizations to obtain the zero point energies (ZPE). The nature of the stationary points was determined in each case according to the Hessian matrix eigenvalues. We have also checked that imaginary frequencies exhibit the expected motion, while transition states have also been verified by intrinsic reaction coordinate (IRC) calculations. More accurate energies were obtained by single-point calculations including the DFT hybrid B3LYP-D3BJ dispersion correction with the larger 6-311+G(2d,2p) basis set. All energies are ZPE-corrected.

**Active site model.** The quantum chemical model used has been devised based on the most populated cluster from a 1000-ns MD simulation on the alkyl-enzyme intermediate (**Int1**, see full details of MD simulation below). The starting structure was obtained from the X-ray crystal structure of wild-type BmEH from the PDB structure: 4NZZ. The cluster model consists of: Asp239-His267-Asp97 catalytic triad, the two active Tyr144 and Tyr203, the nucleophilic water molecule and two hydrogen bonded amide bonds (Gly29-Phe30 and Phe30-Pro31 from the oxyanion motif HGFP). In addition, Trp98, Leu168, Met145, Thr241, Pro240 residues were also included to appropriately describe the shape of the active site cavity of BmEH<sub>4NZZ</sub> enzyme. All amino acids were truncated at the  $\alpha$ - or  $\beta$ -carbon, except for the tyrosines, which are modelled as phenols and for the Pro240, in which only the  $\alpha$ - and its side-chain carbon attached are included to properly simulate the conformational rigidity of proline. Atoms in black in Figure 2 are those maintained fixed to their initial Cartesian coordinates during the optimizations. Hydrogen atoms were included manually based either on literature and BmEH<sub>4NZZ</sub> active site rearrangement, resulting the two aspartate Asp97 and Asp239 active site residues modelled as in the negatively charged state, whereas His267 was modelled in the neutral form, obtaining a quantum model with an overall charge of -2 (see Figure 2).

The epoxide substrates used to model the mechanisms were the racemic styrene oxide (*rac*-SO) and its racemic *para* nitro substituted derivative (*rac-p*-NSO, cluster models of 195 and 197 atoms, respectively). To explore the origins of the enantio- and regioselectivity of BmEH and the effect of the presence of the NO<sub>2</sub> group, all plausible reaction mechanism should be considered. Thus, a total of 16 reaction pathways need to be computed to take into account that EHs hydrolysis of *rac*-epoxides can take place via attack on either carbon atom of each enantiomer, but also two possible binding orientations of the substrate on the basis of the proposed BmEH active site tunnel.<sup>11</sup> The two possible binding poses arise from the orientation of the phenyl moiety of the substrate towards either region 1 (**r1**) placing the phenyl moiety close to His267, or region 3 (**r3**) when it is pointing towards Trp98 (see Figure 1 and 2).

**Molecular Dynamics of the alkyl intermediate.** 1000 ns MD simulation in explicit water was performed using AMBER 16 package<sup>12</sup> in our in-house GPU cluster *Galatea*.

Parameters for the non-standard alkyl-intermediate were generated within the *antechamber* module of AMBER 16 using the general AMBER force field (GAFF),<sup>13</sup> with partial charges set to fit the electrostatic potential generated at the HF/6-31G(d) level by the restrained electrostatic potential (RESP) model.<sup>14</sup> The charges were calculated according to the Merz-Singh-Kollman scheme<sup>15, 16</sup> using Gaussian 09.<sup>5</sup> Amino acid protonation states were predicted using the H++ server (<http://biophysics.cs.vt.edu/H++>).<sup>17</sup> Then, the covalently modified enzyme (PD: 4NZZ) was solvated in a pre-equilibrated truncated cuboid box with a 10-Å buffer of TIP3P<sup>18</sup> water molecules using the AMBER16 *leap* module, resulting in the addition of ~9,000 solvent molecules. The systems were neutralized by addition of explicit counterions (Na<sup>+</sup>). All subsequent calculations were done using the widely tested Stony Brook modification of the Amber 99 force field (ff99SB).<sup>19</sup>

A two-stage geometry optimization approach was performed. The first stage minimizes the positions of solvent molecules and ions imposing positional restraints on solute by a harmonic potential with a force constant of 500 kcal·mol<sup>-1</sup>·Å<sup>-2</sup>, and the second stage is an unrestrained minimization of all the atoms in the simulation cell. The systems are gently heated using six 50-ps steps, incrementing the temperature 50 K each step (0–300 K) under constant volume and periodic boundary conditions. Water molecules were treated with the SHAKE algorithm such that the angle between the hydrogen atoms is kept fixed. Long-range electrostatic effects were modeled using the particle-mesh-Ewald method.<sup>20</sup>

An 8-Å cutoff was applied to Lennard-Jones and electrostatic interactions. Harmonic restraints of 10 kcal·mol<sup>-1</sup> were applied to the solute, and the Langevin equilibration scheme was used to control and equalize the temperature. The time step was kept at 1 fs during the heating stages, allowing potential inhomogeneities to self-adjust. Each system was then equilibrated without restraints for 2 ns with a 2-fs time-step at a constant pressure of 1 atm and temperature of 300 K. After the systems were equilibrated in the NPT ensemble, 1 μs MD simulation was performed under the NVT ensemble and periodic-boundary conditions.

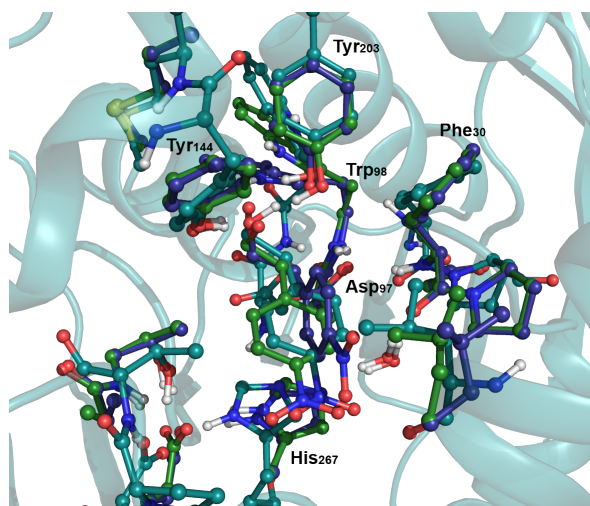

**Figure S1.** Representation of the overlay of the most populated 1 μs MD BmEH simulation (in teal), the cluster model structures **TS1-S-C1-r1** (in green) and **Int1-S-C1-r1** (in purple).

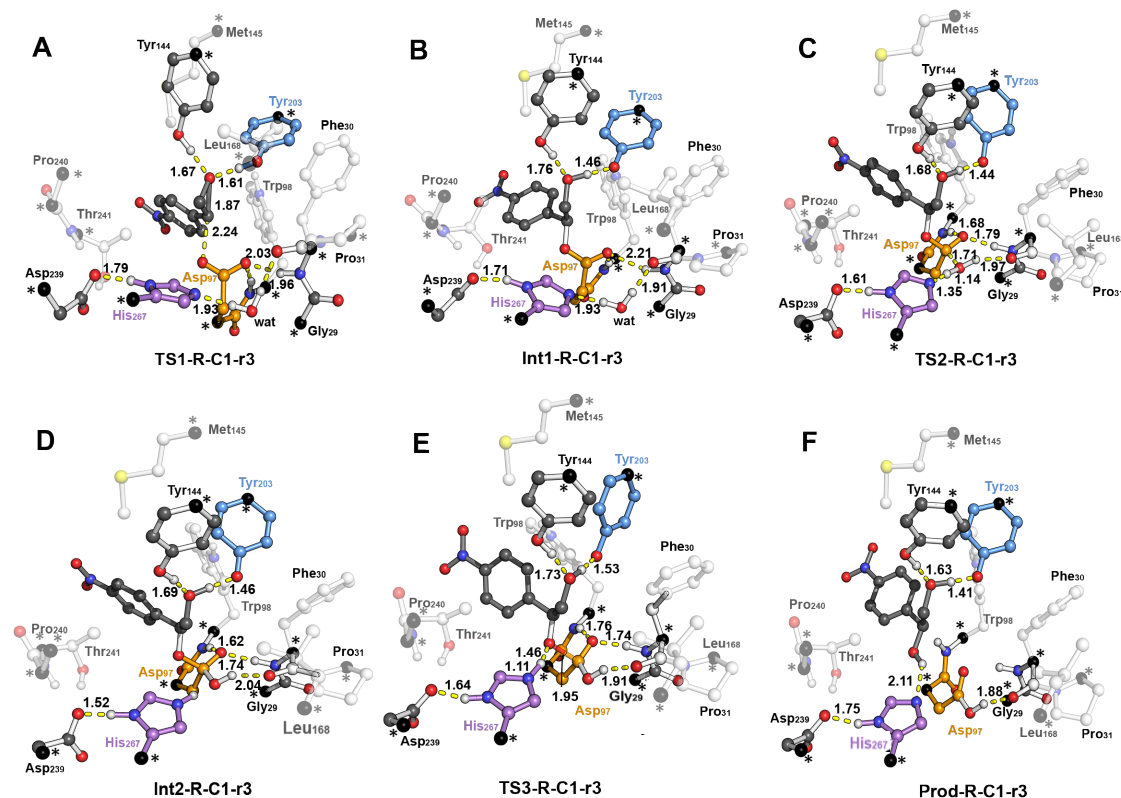

**Figure S2.** B3LYP-D3BJ/6-311+g(2d,2p)//6-31g(d) level corresponding to the different steps of the BmEH mechanism of action for (*R*)-*p*-NSO substrate oriented towards region 3 for the attack at the benzylic position (C1): **A**) epoxide ring opening (**TS1-R-C1-r3**), **B**) alkyl-enzyme intermediate (**Int1-R-C1-r3**), **C**) hydrolysis of alkyl-enzyme intermediate (**TS2-R-C1-r3**), **D**) tetrahedral intermediate (**Int2-R-C1-r3**), **E**) dissociation of tetrahedral (**TS3-R-C1-r3**) and **F**) product complex (**Prod-R-C1-r3**). All distances are in Å. Active site pocket residues are shown as transparent sticks and spheres and non-polar hydrogen atoms are omitted for clarity. Atoms in black spheres and asterisks are those maintained fixed.

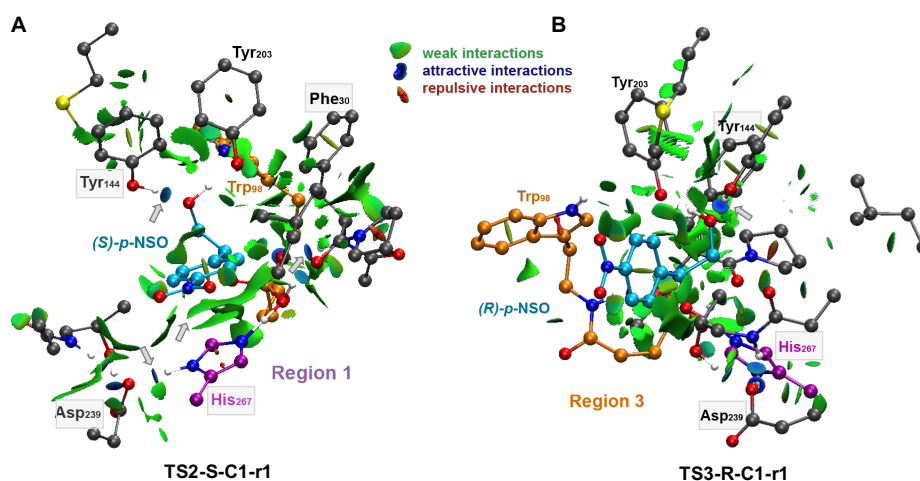

**Figure S3.** Non-covalent interactions representation of transition states **A) TS2-S-C1-r1** and **B) TS3-R-C1-r1** for the most favoured attack of (*S*)-*p*-NSO hydrolysis using the NCIplot computational tool.<sup>21, 22</sup> NCI surface show intermolecular interactions between the epoxide substrate and the active site residues included in the CM model. All residues are represented as balls and sticks and the two possible orientations of each substrate is indicated for each case (region 1, His267 and region 3, Trp98). Only the most important catalytically residues are labelled regarding BmEH (PDB: 4NZZ) numbering and non-polar hydrogen are not shown for clarity. Grey arrows are used to highlight the most important noncovalent interactions. The most important residues are framed.

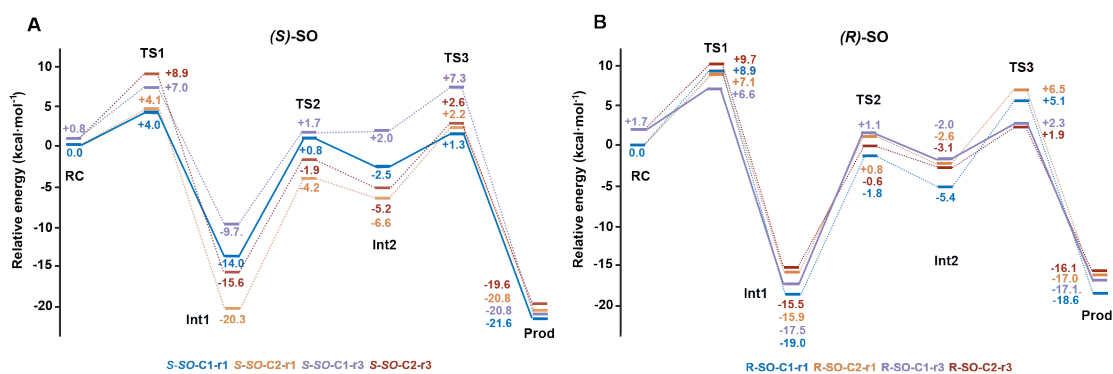

**Figure S4.** Energy profiles at B3LYP-D3BJ/6-311+g(2d,2p)//B3LYP/6-31g(d,p) level of theory for all possible BmEH-mediated epoxide *rac*-SO hydrolysis outcomes. All energies are in kcal·mol<sup>-1</sup> and referenced to the lowest energy RC for each enantiomer, RC-S-SO-r1 and RC-R-SO-r1, respectively.



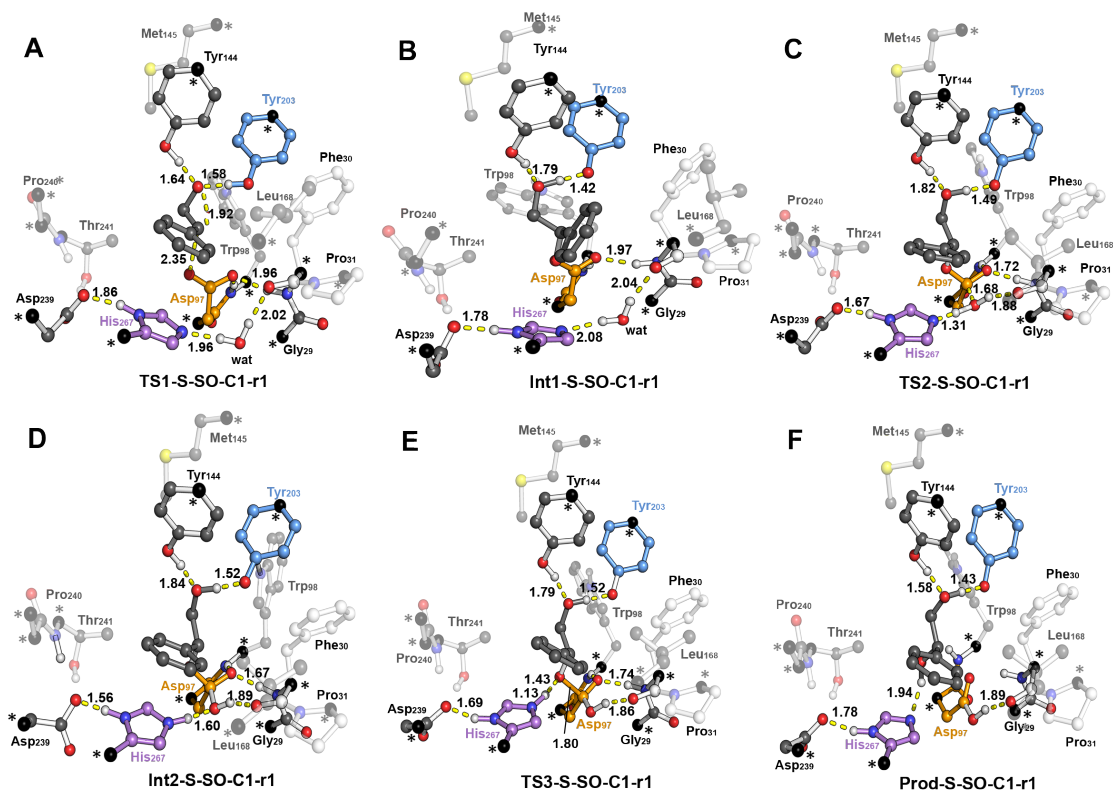

**Figure S5.** B3LYP-D3BJ/6-311+g(2d,2p)//6-31g(d) level corresponding to the different steps of the BmEH mechanism of action for (*S*)-SO substrate oriented towards region 1 for the attack at the benzylic position (C1): **A**) epoxide ring opening (**TS1-S-SO-C1-r1**), **B**) alkyl-enzyme intermediate (**Int1-S-SO-C1-r1**), **C**) hydrolysis of alkyl-enzyme intermediate (**TS2-S-SO-C1-r1**), **D**) tetrahedral intermediate (**Int2-S-SO-C1-r1**), **E**) dissociation of tetrahedral (**TS3-S-SO-C1-r1**) and **F**) product complex (**Prod-S-SO-C1-r1**). All distances are in Å. Active site pocket residues are shown as transparent sticks and spheres and non-polar hydrogen atoms are omitted for clarity. Atoms in black spheres and asterisks are those maintained fixed.

## References

1. C. Lee, W. Yang and R. G. Parr, *Phys. Rev. B*, 1988, **37**, 785-789.
2. A. D. Becke, *J. Chem. Phys.*, 1993, **98**, 5648-5652.
3. P. C. Hariharan and J. A. Pople, *Theor. Chim. Acta*, 1973, **28**, 213-222.
4. W. J. Hehre, R. Ditchfield and J. A. Pople, *J. Chem. Phys.*, 1972, **56**, 2257-2261.
5. G. W. T. M. J. Frisch, H. B. Schlegel, G. E. Scuseria,, J. R. C. M. A. Robb, G. Scalmani, V. Barone, B. Mennucci,, H. N. G. A. Petersson, M. Caricato, X. Li, H. P. Hratchian,, J. B. A. F. Izmaylov, G. Zheng, J. L. Sonnenberg, M. Hada,, K. T. M. Ehara, R. Fukuda, J. Hasegawa, M. Ishida, T. Nakajima,, O. K. Y. Honda, H. Nakai, T. Vreven, J. A. Montgomery, Jr.,, F. O. J. E. Peralta, M. Bearpark, J. J. Heyd, E. Brothers,, V. N. S. K. N. Kudin, T. Keith, R. Kobayashi, J. Normand,, A. R. K. Raghavachari, J. C. Burant, S. S. Iyengar, J. Tomasi,, N. R. M. Cossi, J. M. Millam, M. Klene, J. E. Knox, J. B. Cross,, C. A. V. Bakken, J. Jaramillo, R. Gomperts, R. E. Stratmann,, A. J. A. O. Yazyev, R. Cammi, C. Pomelli, J. W. Ochterski,, K. M. R. L. Martin, V. G. Zakrzewski, G. A. Voth,, J. J. D. P. Salvador, S. Dapprich, A. D. Daniels,, J. B. F. O. Farkas, J. V. Ortiz, J. Cioslowski, and a. D. J. Fox, *Gaussian 09, Revision D.01*, Gaussian, Inc., Wallingford CT, 2013.
6. G. Kiss, N. Celebi-Oelcuem, R. Moretti, D. Baker and K. N. Houk, *Angew. Chem. Int. Ed.*, 2013, **52**, 5700-5725.
7. F. Himo, *Theor. Chem. Acc.*, 2006, **116**, 232-240.
8. V. Barone and M. Cossi, *J. Phys. Chem. A*, 1998, **102**, 1995-2001.
9. V. Barone, M. Cossi and J. Tomasi, *J. Comp. Chem.*, 1998, **19**, 404-417.
10. S. K. Burger and P. W. Ayers, *J. Chem. Phys.*, 2010, **132**, 234110.
11. X.-D. Kong, S. Yuan, L. Li, S. Chen, J.-H. Xu and J. Zhou, *Proc. Nat. Acad. Sci. USA*, 2014, **111**, 15717-15722.
12. D. A. Case, T. A. Darden, T. E. Cheatham, C. L. Simmerling, J. Wang, R. E. Duke, R. Luo, M. Crowley, R. C. Walker, W. Zhang, K. M. Merz, B. Wang, S. Hayik, A. Roitberg, G. Seabra, I. Kolossváry, K. F. Wong, F. Paesani, J. Vanicek, X. Wu, S. R. Brozell, T. Steinbrecher, H. Gohlke, L. Yang, C. Tan, J.

- Mongan, V. Hornak, G. Cui, D. H. Mathews, M. G. Seetin, C. Sagui, V. Babin and P. A. Kollman, *AMBER 16, University of California, San Francisco, 2016*.
13. J. Wang, R. M. Wolf, J. W. Caldwell, P. A. Kollman and D. A. Case, *J. Comp. Chem.*, 2004, **25**, 1157-1174.
  14. C. I. Bayly, P. Cieplak, W. Cornell and P. A. Kollman, *J. Phys. Chem.*, 1993, **97**, 10269-10280.
  15. B. H. Besler, K. M. Merz and P. A. Kollman, *J. Comp. Chem.*, 1990, **11**, 431-439.
  16. U. C. Singh and P. A. Kollman, *J. Comp. Chem.*, 1984, **5**, 129-145.
  17. R. Anandkrishnan, B. Aguilar and A. V. Onufriev, *Nucleic Acids Res.*, 2012, **40**, W537-W541.
  18. W. L. Jorgensen, J. Chandrasekhar, J. D. Madura, R. W. Impey and M. L. Klein, *J. Chem. Phys.*, 1983, **79**, 926-935.
  19. J. Wang, P. Cieplak and P. A. Kollman, *J. Comp. Chem.*, 2000, **21**, 1049-1074.
  20. T. Darden, D. York and L. Pedersen, *J. Chem. Phys.*, 1993, **98**, 10089-10092.
  21. J. Contreras-García, E. R. Johnson, S. Keinan, R. Chaudret, J.-P. Piquemal, D. N. Beratan and W. Yang, *J. Chem. Theory Comput.*, 2011, **7**, 625-632.
  22. E. R. Johnson, S. Keinan, P. Mori-Sánchez, J. Contreras-García, A. J. Cohen and W. Yang, *J. Am. Chem. Soc.*, 2010, **132**, 6498-6506.

## Cartesian coordinates of all analyzed structures

## RC-S-r1

|   |           |           |           |   |           |           |           |
|---|-----------|-----------|-----------|---|-----------|-----------|-----------|
| C | 3.121825  | 0.913373  | -6.063232 | C | -2.483863 | 7.302576  | 1.587327  |
| C | 2.372582  | -0.417722 | -6.004175 | O | -2.820906 | 6.067724  | 1.576492  |
| O | 2.344332  | -1.174090 | -6.982210 | O | -1.323102 | 7.735666  | 1.787114  |
| N | 1.735075  | -0.702694 | -4.831440 | C | -4.495848 | 5.226966  | 4.777165  |
| C | 1.026467  | -1.966736 | -4.654905 | C | -3.039671 | 5.310866  | 5.273471  |
| C | -0.493547 | -1.735401 | -4.577687 | O | -2.772654 | 5.192605  | 6.476862  |
| O | -0.951315 | -0.877462 | -3.799086 | C | -5.347156 | 4.275472  | 5.625776  |
| C | 1.522852  | -2.710617 | -3.384626 | N | -2.100936 | 5.551820  | 4.323316  |
| C | 1.002523  | -4.129639 | -3.291613 | C | -0.684065 | 5.736123  | 4.647347  |
| C | 1.723567  | -5.188832 | -3.863475 | C | 0.306509  | 5.135029  | 3.626957  |
| C | -0.224314 | -4.416303 | -2.675992 | C | -0.116742 | 3.751637  | 3.117131  |
| C | 1.232115  | -6.495198 | -3.829929 | C | -4.451934 | 5.372947  | -1.351934 |
| C | -0.721530 | -5.720787 | -2.643276 | C | -3.180343 | 4.632795  | -1.597222 |
| C | 0.003732  | -6.764954 | -3.222321 | C | -2.739258 | 3.880753  | -2.660230 |
| N | -1.312504 | -2.480843 | -5.349308 | N | -2.142510 | 4.611609  | -0.687786 |
| C | -0.958062 | -3.584905 | -6.275020 | C | -1.138538 | 3.868053  | -1.221486 |
| C | -2.315112 | -4.227240 | -6.594022 | N | -1.465634 | 3.406523  | -2.420907 |
| C | -3.300728 | -3.052401 | -6.497747 | O | -0.564589 | 1.927703  | -4.710760 |
| C | -2.768591 | -2.244730 | -5.309206 | O | -0.392094 | -0.869957 | 0.830481  |
| C | 3.488035  | 3.897733  | -2.592967 | H | 3.684769  | 1.113089  | -5.148917 |
| C | 4.835179  | 3.163777  | -2.656219 | H | 2.398922  | 1.725124  | -6.196611 |
| O | 5.891697  | 3.804622  | -2.614047 | H | 2.616428  | -2.717519 | -3.429361 |
| C | 2.212764  | 3.125073  | -2.956444 | H | 1.237516  | -2.130519 | -2.501768 |
| C | 1.940436  | 1.998715  | -1.944473 | H | 2.681367  | -4.985949 | -4.336637 |
| O | 1.715528  | 2.348685  | -0.759999 | H | -0.784674 | -3.613920 | -2.206935 |
| O | 2.048961  | 0.789946  | -2.349245 | H | 1.809445  | -7.300834 | -4.274857 |
| N | 4.811376  | 1.805811  | -2.728593 | H | -1.673550 | -5.921543 | -2.159667 |
| C | 6.018018  | 0.992573  | -2.643603 | H | -0.381249 | -7.780297 | -3.193534 |
| C | 5.752655  | -0.346018 | -1.926635 | H | 1.271912  | -2.561301 | -5.535593 |
| C | 5.414723  | -0.222072 | -0.466597 | H | -2.315496 | -4.717419 | -7.570739 |
| C | 4.171829  | 0.028610  | 0.064797  | H | -2.552272 | -4.981494 | -5.835751 |
| C | 6.327551  | -0.299308 | 0.648556  | H | -3.259162 | -2.448125 | -7.410736 |
| C | 5.562909  | -0.088929 | 1.833877  | H | -4.336199 | -3.369659 | -6.350644 |
| C | 7.709452  | -0.532953 | 0.771738  | H | -2.973299 | -1.173840 | -5.374466 |
| N | 4.254868  | 0.100777  | 1.443055  | H | -3.177541 | -2.603711 | -4.356332 |
| C | 6.139374  | -0.103582 | 3.108898  | H | -0.266551 | -4.284813 | -5.803428 |
| C | 8.286179  | -0.549184 | 2.037136  | H | 2.264511  | 2.727908  | -3.971128 |
| C | 7.509016  | -0.334874 | 3.194906  | H | 1.369811  | 3.821164  | -2.921955 |
| C | -2.491924 | -4.577003 | 4.960473  | H | 3.392424  | 4.265670  | -1.564205 |
| C | -2.048674 | -4.493740 | 3.640281  | H | 6.646951  | -0.968332 | -2.050023 |
| C | -2.407613 | -3.453909 | 5.788696  | H | 4.945626  | -0.869249 | -2.455057 |
| C | -1.526997 | -3.301121 | 3.140469  | H | 3.228349  | 0.171967  | -0.447241 |
| C | -1.889279 | -2.255069 | 5.303847  | H | 8.321079  | -0.696685 | -0.111735 |
| C | -1.449380 | -2.178473 | 3.976151  | H | 9.353126  | -0.727255 | 2.139239  |
| O | -0.949371 | -0.983883 | 3.544771  | H | 5.538714  | 0.061497  | 3.998789  |
| C | 1.044858  | -6.552423 | 6.686135  | H | 7.986824  | -0.350926 | 4.170310  |
| C | 1.618405  | -5.224661 | 7.195408  | H | 6.778253  | 1.575536  | -2.116659 |
| C | 1.728955  | -4.177788 | 6.083408  | H | -2.105391 | -5.362080 | 2.989891  |
| C | -8.378052 | -2.297238 | -3.100019 | H | -2.750104 | -3.509763 | 6.818172  |
| C | -8.282150 | -3.822001 | -2.978299 | H | -1.168680 | -3.245073 | 2.117401  |
| C | -6.886956 | -4.414017 | -3.259372 | H | -1.820600 | -1.372821 | 5.932259  |
| C | 3.660950  | -5.722743 | 2.007463  | H | -0.736807 | -1.044486 | 2.590010  |
| C | 3.731420  | -4.327826 | 2.059706  | H | 0.982469  | -4.833160 | 7.998797  |
| C | 2.557238  | -6.323476 | 1.393920  | H | 2.373700  | -4.539911 | 5.275201  |
| C | 2.714857  | -3.537278 | 1.516453  | H | 0.742867  | -3.959201 | 5.661489  |
| C | 1.536412  | -5.547670 | 0.848349  | H | 1.681009  | -6.985702 | 5.906553  |
| C | 1.608908  | -4.148560 | 0.911413  | H | -8.997935 | -4.278948 | -3.675184 |
| O | 0.576322  | -3.448918 | 0.361111  | H | -6.570964 | -4.058344 | -4.252652 |
| C | -4.863157 | 8.004972  | 2.166770  | H | -7.760027 | -1.778823 | -2.362258 |
| C | -3.605815 | 8.322992  | 1.353399  | H | 2.488334  | -7.406497 | 1.338731  |
|   |           |           |           | H | 4.587635  | -3.841425 | 2.518771  |

H 0.678725 -6.004810 0.365708  
H 2.786344 -2.453624 1.550017  
H 0.639424 -2.489396 0.527923  
H -3.849847 8.311318 0.282180  
H -3.224240 9.322073 1.584220  
H -5.217916 6.997505 1.940696  
H -5.274961 4.544849 6.681935  
H -6.397263 4.318783 5.321264  
H -4.909298 6.241900 4.840173  
H 0.667148 3.349958 2.468206  
H -0.281896 3.049878 3.943066  
H -1.040078 3.820611 2.534715  
H -0.532928 5.272003 5.625515  
H -5.170409 5.155812 -2.146787  
H -4.903255 5.094672 -0.394405  
H -3.262498 3.654915 -3.579732  
H -0.194651 3.679399 -0.725852  
H -0.740559 2.451706 -3.898861  
H -5.668378 8.715934 1.950452  
H -9.409093 -1.958552 -2.952493  
H 3.794914 0.892064 -6.920511  
H 6.410096 0.785832 -3.649808  
H 3.602442 4.782529 -3.227645  
H 4.455655 -6.329424 2.430051  
H 0.965417 -7.282090 7.498413  
H -0.448350 6.804005 4.751055  
H -2.901878 -5.507159 5.342629  
H -2.174329 5.091760 0.226517  
H -0.566656 1.014132 -4.383716  
H 0.045547 -6.411104 6.260320  
H -2.394075 5.656864 3.346912  
H 1.789534 -0.054783 -4.033554  
H 3.915803 1.318236 -2.717764  
H 3.490058 0.345966 2.051961  
C -1.119911 -0.250332 -0.276481  
C -0.243893 0.560519 0.585099  
H -0.711037 1.178794 1.349468  
H -0.727716 -0.530346 -1.251835  
C -2.603367 -0.167904 -0.189723  
C -3.277812 -0.116364 1.040500  
C -3.331542 -0.074910 -1.386273  
C -4.656356 0.047736 1.080881  
H -2.725627 -0.199120 1.969860  
C -4.711052 0.104662 -1.358374  
H -2.808767 -0.135716 -2.336300  
C -5.354435 0.165411 -0.122036  
H -5.191143 0.095238 2.020495  
H -5.286078 0.199171 -2.270277  
H 0.715963 0.900385 0.199588  
H -4.295273 6.457707 -1.328442  
H -4.656935 8.054135 3.241207  
H -4.517566 4.953689 3.717679  
H -8.060389 -1.961234 -4.094392  
H -0.482533 -3.178885 -7.176182  
H 1.248369 5.011731 4.182808  
H -5.006921 3.239939 5.521741  
O 0.617839 6.008373 2.554698  
H -8.600830 -4.131316 -1.972058  
C -6.951416 -5.947645 -3.310323  
H -5.974033 -6.380129 -3.551135  
H -7.264861 -6.357463 -2.341960  
H -7.667193 -6.293330 -4.064653  
C -5.835985 -3.953356 -2.238582

H -5.719646 -2.865761 -2.226158  
H -6.113437 -4.270215 -1.225276  
H -4.854901 -4.386779 -2.463090  
N -6.802197 0.368076 -0.081710  
O -7.360178 0.379627 1.018287  
O -7.399885 0.522284 -1.151565  
H 2.608668 -5.395016 7.635752  
S 2.439818 -2.613725 6.744815  
C 2.445289 -1.583806 5.233128  
H 2.887470 -0.623499 5.507596  
H 3.053865 -2.045913 4.452023  
H 1.432064 -1.415309 4.860913  
H -0.179464 6.516292 2.259434

**TS1-S-C1-r1**

C 3.070883 0.374602 -5.893801  
C 2.332938 -0.962921 -5.847655  
O 2.216537 -1.670895 -6.853520  
N 1.800805 -1.309925 -4.639462  
C 0.975521 -2.505501 -4.485504  
C -0.518121 -2.128029 -4.599920  
O -0.955764 -1.131262 -3.997713  
C 1.269640 -3.182171 -3.124012  
C 0.535054 -4.489813 -2.919227  
C 1.068426 -5.694772 -3.402871  
C -0.698001 -4.527171 -2.253149  
C 0.387175 -6.902248 -3.232192  
C -1.381893 -5.731971 -2.079961  
C -0.843018 -6.923540 -2.571197  
N -1.338213 -2.897785 -5.345011  
C -1.009010 -4.123692 -6.105595  
C -2.386783 -4.702396 -6.454386  
C -3.274106 -3.455243 -6.589032  
C -2.763624 -2.536604 -5.472627  
C 3.437077 3.358987 -2.423535  
C 4.768761 2.597089 -2.521978  
O 5.826622 3.219359 -2.674914  
C 2.127767 2.598489 -2.714281  
C 1.787724 1.443775 -1.748256  
O 1.306177 1.749297 -0.615613  
O 2.023787 0.256087 -2.135608  
N 4.743934 1.245096 -2.391536  
C 5.967074 0.453798 -2.474167  
C 5.741034 -1.023173 -2.118768  
C 5.600470 -1.318583 -0.653250  
C 4.479476 -1.773668 -0.004675  
C 6.637218 -1.225874 0.348829  
C 6.064121 -1.642045 1.585474  
C 7.993997 -0.853205 0.325500  
N 4.744340 -1.951555 1.340933  
C 6.803512 -1.693195 2.772682  
C 8.732093 -0.903243 1.502952  
C 8.142183 -1.318985 2.715066  
C -2.542888 -5.115799 5.129903  
C -1.926717 -4.953673 3.885718  
C -2.560754 -4.037608 6.021109  
C -1.330386 -3.741711 3.529625  
C -1.968496 -2.823120 5.680943  
C -1.342896 -2.664990 4.432356  
O -0.771928 -1.465624 4.163203  
C 0.993965 -7.091160 6.855507  
C 1.167769 -5.839079 7.723592  
C 1.466119 -4.593784 6.884876

|   |           |           |           |   |           |           |           |
|---|-----------|-----------|-----------|---|-----------|-----------|-----------|
| C | -8.428988 | -2.835999 | -2.930588 | H | -0.311036 | -1.459037 | 3.277829  |
| C | -7.780440 | -4.190497 | -2.625931 | H | 0.257342  | -5.669945 | 8.311215  |
| C | -6.249526 | -4.233160 | -2.802130 | H | 2.385475  | -4.735760 | 6.305720  |
| C | 3.609956  | -6.261535 | 2.176966  | H | 0.647505  | -4.394150 | 6.186167  |
| C | 3.156609  | -5.191985 | 2.950057  | H | 1.897541  | -7.298665 | 6.271709  |
| C | 3.260964  | -6.325789 | 0.825400  | H | -8.226944 | -4.952036 | -3.279784 |
| C | 2.365872  | -4.188341 | 2.385668  | H | -6.024749 | -3.886773 | -3.823001 |
| C | 2.478313  | -5.331725 | 0.246292  | H | -8.079946 | -2.051982 | -2.251553 |
| C | 2.028515  | -4.251000 | 1.021483  | H | 3.605098  | -7.156370 | 0.214817  |
| O | 1.283163  | -3.299075 | 0.414736  | H | 3.416693  | -5.133821 | 4.003479  |
| C | -4.914103 | 7.466203  | 2.336205  | H | 2.201901  | -5.372053 | -0.801360 |
| C | -3.686085 | 7.828554  | 1.497530  | H | 1.992302  | -3.365378 | 2.988634  |
| C | -2.519337 | 6.851378  | 1.705076  | H | 1.091061  | -2.537361 | 1.039093  |
| O | -2.803275 | 5.603767  | 1.697119  | H | -3.951660 | 7.811623  | 0.431422  |
| O | -1.375331 | 7.337654  | 1.878814  | H | -3.336474 | 8.840657  | 1.722396  |
| C | -4.546800 | 4.688203  | 4.946605  | H | -5.239382 | 6.447487  | 2.114784  |
| C | -3.084058 | 4.756588  | 5.424156  | H | -5.314984 | 3.996456  | 6.852890  |
| O | -2.802469 | 4.600574  | 6.619841  | H | -6.450097 | 3.791645  | 5.499387  |
| C | -5.398101 | 3.736699  | 5.795199  | H | -4.951161 | 5.706092  | 5.020574  |
| N | -2.150759 | 5.026592  | 4.474817  | H | 0.671351  | 3.191410  | 2.314998  |
| C | -0.735001 | 5.197402  | 4.816806  | H | -0.287409 | 2.662212  | 3.720210  |
| C | 0.280490  | 4.768540  | 3.735041  | H | -1.040231 | 3.629904  | 2.435971  |
| C | -0.122039 | 3.481172  | 3.009795  | H | -0.570392 | 4.610749  | 5.724987  |
| C | -4.502887 | 4.834192  | -1.182502 | H | -5.181214 | 4.814613  | -2.039867 |
| C | -3.171401 | 4.299006  | -1.571828 | H | -4.958530 | 4.239510  | -0.382197 |
| C | -2.695374 | 3.727392  | -2.727622 | H | -3.225685 | 3.565652  | -3.656524 |
| N | -2.112238 | 4.265753  | -0.690200 | H | -0.119110 | 3.477807  | -0.845418 |
| C | -1.064134 | 3.684502  | -1.326662 | H | -0.607144 | 2.244331  | -4.002499 |
| N | -1.378691 | 3.342293  | -2.568577 | H | -5.747707 | 8.149434  | 2.139101  |
| O | -0.347933 | 1.691047  | -4.770656 | H | -9.518587 | -2.892130 | -2.835176 |
| O | 0.641822  | -1.279067 | 1.923099  | H | 3.721251  | 0.387617  | -6.768647 |
| H | 3.652781  | 0.557220  | -4.987165 | H | 6.374944  | 0.519602  | -3.492482 |
| H | 2.327686  | 1.174598  | -5.982541 | H | 3.528573  | 4.207220  | -3.107363 |
| H | 2.350679  | -3.350634 | -3.081062 | H | 4.225003  | -7.037340 | 2.622805  |
| H | 1.022259  | -2.483641 | -2.320610 | H | 0.785426  | -7.970222 | 7.473821  |
| H | 2.029136  | -5.685349 | -3.912506 | H | -0.522413 | 6.245607  | 5.069150  |
| H | -1.115813 | -3.605863 | -1.857816 | H | -3.006935 | -6.060394 | 5.396236  |
| H | 0.819750  | -7.824393 | -3.610013 | H | -2.150043 | 4.663995  | 0.260015  |
| H | -2.330693 | -5.741168 | -1.551130 | H | -0.478137 | 0.779635  | -4.462550 |
| H | -1.372620 | -7.861476 | -2.431590 | H | 0.162896  | -6.969149 | 6.152520  |
| H | 1.255459  | -3.174790 | -5.300311 | H | -2.442122 | 5.170055  | 3.503126  |
| H | -2.355924 | -5.315265 | -7.358771 | H | 1.842866  | -0.653844 | -3.853845 |
| H | -2.741115 | -5.331544 | -5.630478 | H | 3.854329  | 0.750627  | -2.328676 |
| H | -3.116315 | -2.983389 | -7.565246 | H | 4.117174  | -2.409942 | 1.986311  |
| H | -4.340507 | -3.672229 | -6.488801 | C | 0.546389  | -0.062141 | 0.489347  |
| H | -2.860832 | -1.471978 | -5.696426 | C | 1.227980  | 0.006527  | 1.778686  |
| H | -3.278449 | -2.722913 | -4.521893 | H | 0.869441  | 0.743460  | 2.501624  |
| H | -0.408734 | -4.809660 | -5.507215 | H | 1.074946  | -0.579306 | -0.299238 |
| H | 2.134771  | 2.196796  | -3.728327 | C | -0.883633 | 0.191976  | 0.270579  |
| H | 1.310011  | 3.320781  | -2.669182 | C | -1.747511 | 0.642346  | 1.285185  |
| H | 3.397494  | 3.782845  | -1.411434 | C | -1.396959 | -0.047739 | -1.015027 |
| H | 6.600548  | -1.578596 | -2.517029 | C | -3.091173 | 0.866646  | 1.016290  |
| H | 4.863655  | -1.396027 | -2.661141 | H | -1.379916 | 0.795979  | 2.292373  |
| H | 3.495809  | -1.988761 | -0.397089 | C | -2.741348 | 0.159771  | -1.294454 |
| H | 8.462832  | -0.533049 | -0.600936 | H | -0.742381 | -0.381810 | -1.811899 |
| H | 9.779995  | -0.616923 | 1.492639  | C | -3.569714 | 0.622177  | -0.273245 |
| H | 6.347715  | -2.014264 | 3.704843  | H | -3.767617 | 1.218367  | 1.784147  |
| H | 8.742968  | -1.347207 | 3.619630  | H | -3.135185 | -0.022694 | -2.285018 |
| H | 6.719643  | 0.898032  | -1.814482 | H | 2.320785  | 0.013897  | 1.725402  |
| H | -1.907365 | -5.777915 | 3.177687  | H | -4.440470 | 5.865468  | -0.821386 |
| H | -3.039354 | -4.141446 | 6.991261  | H | -4.686656 | 7.519865  | 3.406173  |
| H | -0.857341 | -3.624919 | 2.559100  | H | -4.583436 | 4.422555  | 3.885190  |
| H | -1.977319 | -1.983027 | 6.368443  | H | -8.201891 | -2.511718 | -3.952989 |

H -0.443994 -3.862306 -7.009365  
H 1.209382 4.565912 4.287890  
H -5.067281 2.699419 5.679765  
O 0.619756 5.802472 2.829498  
H -8.025392 -4.493070 -1.597413  
C -5.733282 -5.673962 -2.671956  
H -4.651678 -5.726105 -2.838496  
H -5.933315 -6.070348 -1.668547  
H -6.217378 -6.340501 -3.394805  
C -5.517963 -3.308271 -1.817650  
H -5.801526 -2.258689 -1.938285  
H -5.735468 -3.596949 -0.781370  
H -4.432698 -3.371249 -1.955690  
N -4.984720 0.858991 -0.558767  
O -5.672743 1.402808 0.310092  
O -5.427355 0.505447 -1.655985  
H 1.980236 -5.997469 8.443594  
S 1.683037 -3.116718 7.960852  
C 2.021271 -1.841748 6.693376  
H 2.175221 -0.899601 7.223731  
H 2.928647 -2.083495 6.133729  
H 1.178874 -1.730685 6.006422  
H -0.190422 6.224561 2.444100

**Int1-S-C1-r1**

C 2.691911 0.205671 -6.067566  
C 1.708791 -0.965037 -6.091918  
O 1.436853 -1.568316 -7.133323  
N 1.152059 -1.283766 -4.887344  
C 0.110150 -2.293393 -4.741772  
C -1.268981 -1.601464 -4.701888  
O -1.436159 -0.601614 -3.983920  
C 0.344976 -3.140755 -3.467030  
C -0.557475 -4.353821 -3.378865  
C -0.176637 -5.568155 -3.970682  
C -1.798386 -4.289459 -2.729297  
C -1.012116 -6.685444 -3.918312  
C -2.637652 -5.404143 -2.676663  
C -2.247721 -6.605773 -3.271685  
N -2.277711 -2.105686 -5.446129  
C -2.267065 -3.296281 -6.330126  
C -3.753912 -3.517305 -6.637930  
C -4.341361 -2.097899 -6.604507  
C -3.592027 -1.434544 -5.443182  
C 3.895021 2.685567 -2.414675  
C 5.019743 1.690303 -2.735952  
O 6.168557 2.122408 -2.869627  
C 2.386947 2.286320 -2.410132  
C 1.887450 0.995594 -1.768948  
O 1.270489 1.121090 -0.583648  
O 1.974995 -0.091756 -2.334893  
N 4.718467 0.370717 -2.788559  
C 5.732187 -0.665595 -2.898583  
C 5.346418 -1.964554 -2.168683  
C 5.110201 -1.835291 -0.690429  
C 3.924084 -2.093452 -0.046985  
C 6.048475 -1.443312 0.335611  
C 5.347418 -1.476981 1.578885  
C 7.408416 -1.080659 0.339924  
N 4.058869 -1.882639 1.310557  
C 5.962258 -1.148295 2.792491  
C 8.022686 -0.757173 1.544834  
C 7.305409 -0.787375 2.759112

C -3.323714 -5.021916 4.871510  
C -2.594288 -4.953194 3.679181  
C -3.164327 -3.997383 5.811845  
C -1.718998 -3.892450 3.421223  
C -2.297125 -2.933560 5.569096  
C -1.564023 -2.869127 4.370651  
O -0.731903 -1.809049 4.210965  
C -0.201903 -7.851294 6.151509  
C 0.318842 -6.763739 7.098966  
C 0.869853 -5.555844 6.337284  
C -9.037689 -0.794501 -2.496874  
C -8.708243 -1.915727 -3.489204  
C -8.005775 -3.141668 -2.872809  
C 2.254983 -7.141657 1.368884  
C 2.265432 -6.124872 2.329350  
C 1.791976 -6.837766 0.083658  
C 1.826359 -4.837555 2.022827  
C 1.355376 -5.555799 -0.237304  
C 1.358266 -4.507531 0.721754  
O 0.949920 -3.295408 0.393400  
C -3.084498 7.986690 3.306402  
C -1.963092 8.552014 2.436923  
C -0.702056 7.674770 2.325539  
O -0.876530 6.391035 2.449062  
O 0.379144 8.227243 2.084305  
C -3.173936 4.955430 5.645076  
C -1.705162 4.702722 6.014568  
O -1.418475 4.208413 7.112560  
C -3.953580 3.633684 5.787940  
N -0.772320 4.988527 5.071788  
C 0.644021 4.664717 5.263091  
C 1.354055 4.242590 3.963752  
C 0.644011 3.093963 3.242661  
C -3.455602 5.678303 -0.436808  
C -2.147005 5.106856 -0.853582  
C -1.761479 4.440214 -1.992982  
N -1.014487 5.171132 -0.070186  
C -0.016079 4.554027 -0.750149  
N -0.427091 4.091699 -1.923870  
O -0.224504 2.096583 -4.235881  
O 0.894910 -1.450096 2.038736  
H 3.391369 0.136153 -5.230711  
H 2.129984 1.139641 -5.957138  
H 1.392371 -3.458233 -3.483664  
H 0.214839 -2.504652 -2.587031  
H 0.786444 -5.638011 -4.470588  
H -2.105063 -3.360154 -2.258233  
H -0.695732 -7.617880 -4.377207  
H -3.592806 -5.334992 -2.163873  
H -2.897549 -7.474822 -3.225483  
H 0.188776 -2.931301 -5.623662  
H -3.902328 -4.028617 -7.592375  
H -4.205496 -4.130762 -5.850567  
H -4.120581 -1.575300 -7.541982  
H -5.424468 -2.083129 -6.458702  
H -3.460142 -0.356464 -5.559352  
H -4.094400 -1.604576 -4.482868  
H -1.812607 -4.152957 -5.830662  
H 2.028643 2.200419 -3.438967  
H 1.834955 3.114715 -1.970430  
H 4.162845 3.087619 -1.430516  
H 6.153976 -2.682318 -2.369490  
H 4.447867 -2.385671 -2.636582

H 2.976049 -2.440457 -0.434359  
H 7.975991 -1.055555 -0.586214  
H 9.071716 -0.474776 1.554083  
H 5.409168 -1.177262 3.726849  
H 7.810432 -0.526321 3.684754  
H 6.660693 -0.251223 -2.497549  
H -2.701416 -5.735727 2.932527  
H -3.720091 -4.024295 6.745477  
H -1.153577 -3.855563 2.494269  
H -2.172080 -2.137309 6.296443  
H -0.242652 -1.797207 3.348292  
H -0.490049 -6.435862 7.763140  
H 1.688205 -5.862907 5.676678  
H 0.089032 -5.099843 5.720549  
H 0.592043 -8.214300 5.489791  
H -8.062347 -1.509455 -4.279382  
H -7.106796 -2.778319 -2.354697  
H -9.766744 -1.115248 -1.745437  
H 1.771958 -7.611870 -0.681371  
H 2.624492 -6.336462 3.334848  
H 0.994875 -5.331354 -1.236468  
H 1.833088 -4.062326 2.785235  
H 0.963811 -2.254761 1.339942  
H -2.331376 8.702937 1.411560  
H -1.647039 9.539314 2.789574  
H -3.406515 7.011704 2.932865  
H -3.821698 3.230801 6.794504  
H -5.022190 3.785923 5.607072  
H -3.572543 5.701475 6.341834  
H 1.222119 2.807615 2.360131  
H 0.538903 2.218422 3.893037  
H -0.355338 3.393075 2.912517  
H 0.688365 3.859096 6.000414  
H -4.209619 5.483799 -1.203516  
H -3.811481 5.240154 0.502746  
H -2.366513 4.189725 -2.853789  
H 0.981075 4.464167 -0.342917  
H -0.255002 2.649701 -3.432830  
H -3.953237 8.654670 3.317096  
H -9.462841 0.072568 -3.013942  
H 3.239442 0.223535 -7.009862  
H 5.925596 -0.902781 -3.954460  
H 4.000987 3.516816 -3.115955  
H 2.598319 -8.142282 1.615278  
H -0.588126 -8.707888 6.713500  
H 1.183899 5.525417 5.680945  
H -4.001190 -5.848836 5.059173  
H -0.940832 5.608099 0.868723  
H -0.621106 1.241870 -3.995051  
H -1.012151 -7.468244 5.521969  
H -1.035783 5.481099 4.216336  
H 1.341547 -0.693677 -4.083700  
H 3.752528 0.069871 -2.725617  
H 3.295298 -1.962861 1.969184  
C 0.667058 -0.093870 -0.015052  
C 1.109488 -0.173321 1.467433  
H 0.566254 0.571596 2.056438  
H 1.086426 -0.952212 -0.538080  
C -0.834930 -0.084404 -0.204791  
C -1.531037 -1.297567 -0.052708  
C -1.547399 1.085361 -0.498695  
C -2.913515 -1.339157 -0.192137  
H -0.977258 -2.210475 0.146602

C -2.930235 1.052391 -0.658405  
H -1.020950 2.020766 -0.637255  
C -3.597112 -0.161867 -0.502331  
H -3.461368 -2.265818 -0.078563  
H -3.481730 1.949908 -0.906200  
H 2.175060 0.097856 1.487213  
H -3.400717 6.763318 -0.288416  
H -2.754122 7.853447 4.341626  
H -3.266950 5.357989 4.633396  
H -8.138221 -0.460790 -1.967034  
H -1.696294 -3.079862 -7.241972  
H -9.628681 -2.248283 -3.991899  
C -8.884580 -3.861882 -1.838962  
H -8.366544 -4.733459 -1.423865  
H -9.152414 -3.209628 -1.002384  
H -9.816007 -4.216940 -2.298883  
C -7.559458 -4.118212 -3.970575  
H -6.896627 -3.630108 -4.694210  
H -7.021343 -4.974251 -3.548484  
H -8.423244 -4.509448 -4.523202  
H 1.104202 -7.178953 7.742837  
S 1.511011 -4.283496 7.502249  
C 2.077404 -3.012925 6.313865  
H 1.246627 -2.628629 5.717148  
H 2.502609 -2.196282 6.901402  
H 2.852804 -3.416751 5.657524  
H 2.346803 3.890202 4.277066  
O 1.604291 5.334726 3.093505  
H 0.744730 5.723362 2.798363  
H -3.591989 2.888571 5.072090  
N -5.045589 -0.212309 -0.692232  
O -5.618493 -1.293832 -0.522820  
O -5.631875 0.824476 -1.016803

**TS2-S-C1-r1**

C 2.903161 -0.242890 -6.026171  
C 1.888485 -1.390114 -5.956841  
O 1.513491 -1.976927 -6.978828  
N 1.444385 -1.709808 -4.711366  
C 0.451084 -2.753913 -4.490776  
C -0.970104 -2.167574 -4.559897  
O -1.238580 -1.101269 -3.969815  
C 0.697137 -3.466101 -3.137002  
C -0.151238 -4.707262 -2.952432  
C 0.260992 -5.937251 -3.488433  
C -1.371835 -4.657216 -2.265076  
C -0.527633 -7.081528 -3.352817  
C -2.165005 -5.798403 -2.129213  
C -1.747432 -7.014061 -2.675469  
N -1.922160 -2.827510 -5.249229  
C -1.796907 -4.094398 -6.015816  
C -3.252961 -4.457466 -6.335272  
C -3.949944 -3.092516 -6.442686  
C -3.286607 -2.270584 -5.332276  
C 3.808098 2.725293 -2.641809  
C 4.995192 1.760407 -2.830007  
O 6.095062 2.211206 -3.178973  
C 2.351804 2.285137 -2.952735  
C 1.663520 1.032476 -2.326751  
O 1.253293 1.260282 -0.976717  
O 2.139698 -0.127254 -2.571168  
N 4.809016 0.455306 -2.520744  
C 5.882290 -0.520673 -2.689590



|   |           |           |           |   |           |           |           |
|---|-----------|-----------|-----------|---|-----------|-----------|-----------|
| C | 5.431296  | -1.961741 | -2.405086 | H | -3.744685 | -2.639007 | -7.418770 |
| C | 5.347873  | -2.342511 | -0.954715 | H | -5.034208 | -3.151847 | -6.320005 |
| C | 4.221112  | -2.692403 | -0.248961 | H | -3.239493 | -1.199855 | -5.541155 |
| C | 6.455737  | -2.479136 | -0.038052 | H | -3.797435 | -2.399102 | -4.369509 |
| C | 5.916112  | -2.914276 | 1.208750  | H | -1.294732 | -4.862314 | -5.427622 |
| C | 7.847740  | -2.300033 | -0.144742 | H | 2.276463  | 2.097923  | -4.026315 |
| N | 4.554467  | -3.021322 | 1.050170  | H | 1.715648  | 3.152183  | -2.753396 |
| C | 6.723712  | -3.164768 | 2.324736  | H | 3.870816  | 3.075765  | -1.602326 |
| C | 8.652396  | -2.548862 | 0.962056  | H | 6.154980  | -2.619850 | -2.905121 |
| C | 8.095102  | -2.976103 | 2.185791  | H | 4.468707  | -2.143565 | -2.897522 |
| C | -3.117792 | -4.618991 | 5.277892  | H | 3.185921  | -2.743837 | -0.558444 |
| C | -2.517618 | -4.647211 | 4.012715  | H | 8.292520  | -1.975218 | -1.081555 |
| C | -2.880551 | -3.511263 | 6.100222  | H | 9.727692  | -2.412490 | 0.886365  |
| C | -1.694519 | -3.605247 | 3.569211  | H | 6.292759  | -3.497036 | 3.264772  |
| C | -2.063544 | -2.465064 | 5.673186  | H | 8.747777  | -3.161989 | 3.034199  |
| C | -1.458376 | -2.500587 | 4.403707  | H | 6.722909  | -0.251078 | -2.039694 |
| O | -0.664113 | -1.449965 | 4.072089  | H | -2.686676 | -5.494096 | 3.352727  |
| C | 0.141801  | -7.058104 | 6.955699  | H | -3.334873 | -3.457495 | 7.086135  |
| C | 0.601193  | -5.835736 | 7.759780  | H | -1.231260 | -3.645212 | 2.586812  |
| C | 1.064121  | -4.695164 | 6.850397  | H | -1.879173 | -1.606059 | 6.310966  |
| C | -8.847649 | -1.663120 | -2.674703 | H | -0.263362 | -1.495508 | 3.169193  |
| C | -8.512835 | -3.155488 | -2.775478 | H | -0.220808 | -5.482798 | 8.394639  |
| C | -7.012104 | -3.495540 | -2.681124 | H | 1.898101  | -5.024139 | 6.220850  |
| C | 2.707586  | -6.719168 | 2.189694  | H | 0.249216  | -4.370895 | 6.195791  |
| C | 2.497948  | -5.545571 | 2.920086  | H | 0.951624  | -7.448802 | 6.329888  |
| C | 2.290794  | -6.752637 | 0.852552  | H | -8.897118 | -3.540299 | -3.730028 |
| C | 1.896175  | -4.427094 | 2.338915  | H | -6.489272 | -2.900902 | -3.446691 |
| C | 1.693605  | -5.649006 | 0.255695  | H | -8.556494 | -1.241414 | -1.707780 |
| C | 1.472006  | -4.434353 | 0.972786  | H | 2.440621  | -7.657059 | 0.264875  |
| O | 0.927160  | -3.397372 | 0.394816  | H | 2.810390  | -5.496491 | 3.961852  |
| C | -3.701891 | 8.114896  | 2.238396  | H | 1.375650  | -5.688492 | -0.781731 |
| C | -2.466213 | 8.371130  | 1.374177  | H | 1.724959  | -3.525991 | 2.923431  |
| C | -1.399888 | 7.286877  | 1.559329  | H | 0.850849  | -2.145302 | 1.171138  |
| O | -1.820813 | 6.073261  | 1.573445  | H | -2.754165 | 8.378644  | 0.313678  |
| O | -0.206596 | 7.638247  | 1.692907  | H | -2.018642 | 9.345248  | 1.592351  |
| C | -3.666899 | 5.367302  | 4.906022  | H | -4.127887 | 7.135490  | 2.012352  |
| C | -2.191388 | 5.230030  | 5.323897  | H | -4.432105 | 4.684557  | 6.816313  |
| O | -1.890661 | 5.060500  | 6.512582  | H | -5.642870 | 4.687312  | 5.513856  |
| C | -4.594302 | 4.487896  | 5.754285  | H | -3.936662 | 6.422689  | 5.042201  |
| N | -1.258584 | 5.329260  | 4.339134  | H | 1.367756  | 3.262342  | 2.085684  |
| C | 0.172695  | 5.306705  | 4.660689  | H | 0.350702  | 2.793652  | 3.467779  |
| C | 1.131605  | 4.827163  | 3.553257  | H | -0.291583 | 3.879662  | 2.217629  |
| C | 0.603444  | 3.613592  | 2.785562  | H | 0.276360  | 4.652088  | 5.530851  |
| C | -3.788275 | 5.379364  | -1.223811 | H | -4.594521 | 5.105001  | -1.908172 |
| C | -2.599043 | 4.518976  | -1.456548 | H | -4.154833 | 5.275623  | -0.198252 |
| C | -2.308803 | 3.578537  | -2.412241 | H | -2.907519 | 3.248733  | -3.247932 |
| N | -1.500494 | 4.557317  | -0.622316 | H | 0.333987  | 3.437523  | -0.586503 |
| C | -0.604041 | 3.661205  | -1.066469 | H | -0.450384 | 2.029938  | -2.717522 |
| N | -1.061224 | 3.049134  | -2.154581 | H | -4.470776 | 8.877347  | 2.071121  |
| O | 0.224435  | 1.188341  | -3.188402 | H | -9.922671 | -1.493448 | -2.797197 |
| O | 0.771252  | -1.255571 | 1.704503  | H | 3.733311  | -0.552386 | -6.665845 |
| H | 3.277483  | 0.048047  | -5.044199 | H | 6.263166  | -0.457069 | -3.718186 |
| H | 2.425011  | 0.620865  | -6.499013 | H | 4.029711  | 3.590519  | -3.270574 |
| H | 1.757464  | -3.737385 | -3.113144 | H | 3.178354  | -7.583472 | 2.649121  |
| H | 0.529058  | -2.773290 | -2.309235 | H | -0.187209 | -7.863616 | 7.620302  |
| H | 1.212112  | -5.997792 | -4.012202 | H | 0.510694  | 6.304119  | 4.975703  |
| H | -1.693822 | -3.721317 | -1.818006 | H | -3.755419 | -5.432868 | 5.607765  |
| H | -0.186811 | -8.024754 | -3.770438 | H | -1.452634 | 5.134987  | 0.248986  |
| H | -3.103536 | -5.739703 | -1.585104 | H | -0.193450 | 0.310334  | -3.333786 |
| H | -2.361233 | -7.903228 | -2.564293 | H | -0.694733 | -6.801661 | 6.296836  |
| H | 0.581129  | -3.474729 | -5.300895 | H | -1.545743 | 5.533893  | 3.378437  |
| H | -3.333238 | -5.059440 | -7.243804 | H | 1.714013  | -1.113110 | -3.914910 |
| H | -3.679035 | -5.034592 | -5.507451 | H | 3.847832  | 0.111031  | -2.404977 |

H 3.898535 -3.423766 1.710973  
C 0.630007 0.116615 -0.315618  
C 1.391919 -0.206340 0.984586  
H 1.437411 0.680955 1.626840  
H 0.740074 -0.742758 -0.978438  
C -0.858335 0.347697 -0.068083  
C -1.320618 1.100006 1.022927  
C -1.805596 -0.233444 -0.923984  
C -2.679138 1.296021 1.242956  
H -0.615632 1.535765 1.718508  
C -3.170637 -0.050440 -0.725457  
H -1.480539 -0.827477 -1.770189  
C -3.591631 0.719893 0.357192  
H -3.035336 1.880182 2.081650  
H -3.900364 -0.491656 -1.392083  
H 2.425864 -0.458806 0.710347  
H -3.559717 6.439815 -1.380635  
H -3.445025 8.130389 3.302731  
H -3.780744 5.154441 3.838188  
H -8.330651 -1.090198 -3.453391  
H -1.215852 -3.914577 -6.928510  
H -9.049002 -3.706586 -1.989095  
C -6.775051 -4.979469 -2.999060  
H -7.160495 -5.243765 -3.990383  
H -5.707636 -5.225954 -2.975540  
H -7.278514 -5.621058 -2.264936  
C -6.412070 -3.136289 -1.313371  
H -6.487909 -2.068245 -1.090204  
H -6.922864 -3.684157 -0.511169  
H -5.350544 -3.404930 -1.270881  
H -4.402426 3.424804 5.576802  
H 2.036743 4.513481 4.092497  
O 1.574813 5.855506 2.686322  
H 0.818213 6.359135 2.297246  
H 1.418088 -6.121041 8.434214  
S 1.621841 -3.248415 7.841428  
C 2.107003 -2.107227 6.495691  
H 1.259768 -1.878771 5.844724  
H 2.453230 -1.185977 6.969136  
H 2.924247 -2.530345 5.905937  
N -5.021475 0.932482 0.568893  
O -5.376825 1.593508 1.548477  
O -5.814212 0.447223 -0.246508

**Int2-S-C1-r1**

C 3.242997 -0.432005 -5.787997  
C 2.264633 -1.609615 -5.689739  
O 1.932307 -2.251428 -6.694657  
N 1.808350 -1.893640 -4.441100  
C 0.853986 -2.970972 -4.203996  
C -0.587557 -2.471451 -4.392416  
O -0.937394 -1.381329 -3.897621  
C 1.051526 -3.567009 -2.786428  
C 0.275802 -4.847146 -2.560184  
C 0.799908 -6.080800 -2.974946  
C -0.984254 -4.830985 -1.946764  
C 0.081233 -7.264350 -2.794713  
C -1.707673 -6.011786 -1.766654  
C -1.179062 -7.232393 -2.192942  
N -1.466167 -3.230481 -5.077538  
C -1.233998 -4.540011 -5.740005  
C -2.649692 -5.002048 -6.108718  
C -3.404080 -3.686970 -6.357705

C -2.848858 -2.753954 -5.275798  
C 3.804034 2.804998 -2.580006  
C 5.063365 1.914698 -2.607983  
O 6.165122 2.431735 -2.851655  
C 2.415391 2.241740 -2.987324  
C 1.709603 0.976539 -2.369156  
O 1.266010 1.294796 -0.981765  
O 2.357961 -0.162943 -2.425176  
N 4.915539 0.608825 -2.291618  
C 6.050990 -0.310987 -2.298003  
C 5.624954 -1.786859 -2.462410  
C 5.453629 -2.542859 -1.175879  
C 4.293321 -2.762265 -0.469675  
C 6.506026 -3.181961 -0.424155  
C 5.901869 -3.772970 0.724440  
C 7.893972 -3.326532 -0.607971  
N 4.557055 -3.497659 0.667288  
C 6.641947 -4.493806 1.670225  
C 8.632204 -4.038280 0.331071  
C 8.011350 -4.616379 1.459717  
C -3.122994 -4.379993 5.483990  
C -2.472328 -4.451663 4.245275  
C -2.981449 -3.211028 6.240964  
C -1.692720 -3.393641 3.762820  
C -2.208774 -2.147175 5.775731  
C -1.554576 -2.227478 4.533220  
O -0.812968 -1.151144 4.159722  
C 0.170004 -6.507004 7.487005  
C 0.783078 -5.243975 8.103760  
C 1.067963 -4.171745 7.049167  
C -8.574991 -2.302000 -2.929000  
C -8.009069 -3.723981 -2.846878  
C -6.486868 -3.807832 -2.618757  
C 2.963995 -6.340988 2.841997  
C 2.874483 -5.047239 3.367718  
C 2.252297 -6.627335 1.667907  
C 2.109027 -4.059363 2.741228  
C 1.484333 -5.659059 1.032001  
C 1.381895 -4.324402 1.536732  
O 0.670053 -3.420304 0.924166  
C -4.237930 8.066062 1.533896  
C -2.734920 8.367815 1.441786  
C -2.099388 7.379577 0.467607  
O -1.777919 6.223826 0.982834  
O -1.999693 7.664485 -0.733386  
C -4.195007 5.509932 4.386071  
C -2.738511 5.461063 4.879325  
O -2.482185 5.336152 6.081880  
C -5.140978 4.729021 5.304918  
N -1.760928 5.577410 3.938545  
C -0.350013 5.655985 4.335076  
C 0.648749 5.299954 3.226503  
C 0.432710 3.900179 2.649867  
C -3.990094 5.102962 -1.727947  
C -2.736811 4.313776 -1.850021  
C -2.373160 3.315746 -2.713944  
N -1.672157 4.489368 -0.984763  
C -0.710356 3.624572 -1.304220  
N -1.108376 2.904264 -2.353955  
O 0.479317 0.935141 -3.177689  
O 0.743608 -1.061164 1.837363  
C 0.645712 0.176426 -0.298997  
C 1.389189 -0.094500 1.026294

|   |           |           |           |                    |           |           |           |
|---|-----------|-----------|-----------|--------------------|-----------|-----------|-----------|
| C | -0.850935 | 0.393348  | -0.079024 | H                  | -2.909570 | 2.869454  | -3.535389 |
| C | -1.338922 | 1.134728  | 1.009195  | H                  | 0.225417  | 3.478442  | -0.791116 |
| C | -1.780566 | -0.179130 | -0.961941 | H                  | -0.553769 | 2.097516  | -2.745458 |
| C | -2.701469 | 1.334349  | 1.198633  | H                  | -4.737335 | 8.732495  | 2.245023  |
| C | -3.149388 | 0.003799  | -0.790959 | H                  | -9.648125 | -2.319041 | -3.147255 |
| C | -3.594868 | 0.768401  | 0.286841  | H                  | 4.122588  | -0.758182 | -6.349399 |
| H | 3.542914  | -0.052526 | -4.811245 | H                  | 6.711557  | -0.014173 | -3.121010 |
| H | 2.767247  | 0.371652  | -6.358900 | H                  | 4.026325  | 3.651297  | -3.234594 |
| H | 2.123204  | -3.757172 | -2.670362 | H                  | 3.564038  | -7.101924 | 3.332083  |
| H | 0.774096  | -2.826717 | -2.031567 | H                  | -0.031539 | -7.260687 | 8.255287  |
| H | 1.783821  | -6.113439 | -3.436938 | H                  | -0.112925 | 6.668620  | 4.690293  |
| H | -1.389702 | -3.889532 | -1.588657 | H                  | -3.726415 | -5.207711 | 5.842772  |
| H | 0.507830  | -8.209734 | -3.118100 | H                  | -1.646162 | 5.211643  | -0.185313 |
| H | -2.678096 | -5.979511 | -1.279262 | H                  | 0.181000  | 0.009512  | -3.304319 |
| H | -1.739110 | -8.151614 | -2.047211 | H                  | -0.774627 | -6.279110 | 6.981477  |
| H | 1.066528  | -3.743624 | -4.946533 | H                  | -1.995846 | 5.787093  | 2.966813  |
| H | -2.647839 | -5.673322 | -6.971145 | H                  | 2.032403  | -1.240907 | -3.659894 |
| H | -3.094675 | -5.537705 | -5.263159 | H                  | 3.952025  | 0.223302  | -2.219689 |
| H | -3.161263 | -3.294995 | -7.351633 | H                  | 3.858848  | -3.781861 | 1.348616  |
| H | -4.489767 | -3.793772 | -6.293149 | H                  | 1.467209  | 0.837470  | 1.599819  |
| H | -2.842168 | -1.699597 | -5.560189 | H                  | 0.769912  | -0.707563 | -0.929102 |
| H | -3.408990 | -2.841158 | -4.336077 | H                  | -0.648524 | 1.553581  | 1.729886  |
| H | -0.728919 | -5.235351 | -5.069349 | H                  | -1.435695 | -0.769330 | -1.803733 |
| H | 2.453631  | 1.993134  | -4.052069 | H                  | -3.076270 | 1.909568  | 2.035550  |
| H | 1.712319  | 3.078131  | -2.909512 | H                  | -3.865638 | -0.432227 | -1.475526 |
| H | 3.750852  | 3.211986  | -1.560434 | H                  | 2.415005  | -0.396972 | 0.772093  |
| H | 6.395793  | -2.289160 | -3.059562 | H                  | -3.765695 | 6.173434  | -1.706320 |
| H | 4.705821  | -1.831544 | -3.055884 | H                  | -4.410713 | 7.036397  | 1.856271  |
| H | 3.285325  | -2.442183 | -0.691312 | H                  | -4.254371 | 5.141112  | 3.356151  |
| H | 8.384640  | -2.887215 | -1.472816 | H                  | -8.084268 | -1.727718 | -3.723594 |
| H | 9.704397  | -4.153544 | 0.197233  | H                  | -0.611015 | -4.395076 | -6.631058 |
| H | 6.156548  | -4.944867 | 2.530547  | H                  | -8.517233 | -4.275989 | -2.042781 |
| H | 8.613703  | -5.168959 | 2.175512  | C                  | -6.060060 | -3.217439 | -1.266346 |
| H | 6.641824  | -0.198292 | -1.378782 | H                  | -4.976945 | -3.305878 | -1.126764 |
| H | -2.566584 | -5.347624 | 3.637037  | H                  | -6.315439 | -2.158004 | -1.172169 |
| H | -3.476306 | -3.122661 | 7.204696  | H                  | -6.543462 | -3.753969 | -0.439865 |
| H | -1.187875 | -3.465933 | 2.801728  | C                  | -6.002656 | -5.259561 | -2.749371 |
| H | -2.098207 | -1.240201 | 6.362292  | H                  | -6.269571 | -5.684822 | -3.723629 |
| H | -0.358495 | -1.242815 | 3.287916  | H                  | -4.914840 | -5.328536 | -2.638737 |
| H | 0.102847  | -4.836826 | 8.862213  | H                  | -6.454551 | -5.892714 | -1.975501 |
| H | 1.762858  | -4.552405 | 6.293067  | O                  | 0.704352  | 6.290394  | 2.207797  |
| H | 0.144566  | -3.875321 | 6.542087  | H                  | -0.142030 | 6.261968  | 1.712221  |
| H | 0.843877  | -6.952870 | 6.747336  | H                  | 1.634872  | 5.327729  | 3.708982  |
| H | -8.250486 | -4.255208 | -3.777683 | H                  | -4.908808 | 3.659659  | 5.292162  |
| H | -6.001265 | -3.219390 | -3.413125 | H                  | 1.713984  | -5.500732 | 8.624423  |
| H | -8.439316 | -1.751892 | -1.992696 | S                  | 1.810451  | -2.676579 | 7.825788  |
| H | 2.303694  | -7.627163 | 1.239586  | C                  | 2.126671  | -1.655110 | 6.340908  |
| H | 3.416775  | -4.796464 | 4.278162  | H                  | 2.550416  | -0.711261 | 6.691023  |
| H | 0.942810  | -5.895043 | 0.120851  | H                  | 2.848965  | -2.143411 | 5.681943  |
| H | 2.047620  | -3.058934 | 3.161890  | H                  | 1.204352  | -1.451430 | 5.791692  |
| H | 0.768699  | -2.006584 | 1.418982  | N                  | -5.027442 | 0.984056  | 0.465980  |
| H | -2.576138 | 9.386728  | 1.076315  | O                  | -5.805228 | 0.478399  | -0.351539 |
| H | -2.269621 | 8.272306  | 2.428042  | O                  | -5.402221 | 1.669700  | 1.422123  |
| H | -4.715776 | 8.197730  | 0.557493  |                    |           |           |           |
| H | -5.044246 | 5.079001  | 6.334841  |                    |           |           |           |
| H | -6.179486 | 4.854852  | 4.984726  |                    |           |           |           |
| H | -4.491112 | 6.566494  | 4.356593  |                    |           |           |           |
| H | 1.208389  | 3.676244  | 1.911671  |                    |           |           |           |
| H | 0.471584  | 3.138262  | 3.436069  |                    |           |           |           |
| H | -0.541980 | 3.831638  | 2.158785  |                    |           |           |           |
| H | -0.214619 | 4.981016  | 5.185075  |                    |           |           |           |
| H | -4.654811 | 4.891860  | -2.568465 |                    |           |           |           |
| H | -4.523582 | 4.855156  | -0.803422 |                    |           |           |           |
|   |           |           |           | <b>TS3-S-C1-r1</b> |           |           |           |
|   |           |           |           | C                  | 2.857912  | -0.802294 | -6.037808 |
|   |           |           |           | C                  | 1.773110  | -1.877565 | -5.901177 |
|   |           |           |           | O                  | 1.298682  | -2.441535 | -6.894168 |
|   |           |           |           | N                  | 1.380979  | -2.166788 | -4.630195 |
|   |           |           |           | C                  | 0.277985  | -3.083193 | -4.361081 |
|   |           |           |           | C                  | -1.068951 | -2.368001 | -4.571955 |
|   |           |           |           | O                  | -1.229304 | -1.206458 | -4.147647 |
|   |           |           |           | C                  | 0.397126  | -3.642416 | -2.922209 |

|   |           |           |           |   |           |           |           |
|---|-----------|-----------|-----------|---|-----------|-----------|-----------|
| C | -0.615873 | -4.720173 | -2.599986 | C | -3.453799 | 5.440498  | -1.495100 |
| C | -0.384437 | -6.053770 | -2.970912 | C | -2.140917 | 4.753267  | -1.283795 |
| C | -1.810369 | -4.413538 | -1.934493 | C | -1.624279 | 3.603141  | -1.824565 |
| C | -1.322802 | -7.050781 | -2.695536 | N | -1.175333 | 5.214649  | -0.401993 |
| C | -2.751562 | -5.406883 | -1.656405 | C | -0.136738 | 4.370051  | -0.406775 |
| C | -2.513075 | -6.728829 | -2.039592 | N | -0.380234 | 3.384190  | -1.265443 |
| N | -2.072995 | -3.013826 | -5.196291 | O | 0.427219  | 0.950843  | -3.487034 |
| C | -2.057800 | -4.367005 | -5.802408 | O | 0.483674  | -1.289573 | 1.502067  |
| C | -3.536754 | -4.627855 | -6.115859 | H | 3.273541  | -0.498225 | -5.076827 |
| C | -4.092288 | -3.227040 | -6.415275 | H | 2.420942  | 0.070170  | -6.533396 |
| C | -3.368471 | -2.336133 | -5.399107 | H | 1.409836  | -4.044841 | -2.821686 |
| C | 3.962997  | 2.277499  | -2.816501 | H | 0.312110  | -2.827935 | -2.200117 |
| C | 5.075716  | 1.226710  | -3.005752 | H | 0.543975  | -6.313065 | -3.474477 |
| O | 6.182505  | 1.580300  | -3.437553 | H | -1.995042 | -3.391107 | -1.617039 |
| C | 2.495059  | 2.021401  | -3.248521 | H | -1.120571 | -8.077770 | -2.986569 |
| C | 1.619722  | 0.823261  | -2.785862 | H | -3.665328 | -5.149924 | -1.128150 |
| O | 1.081685  | 1.260659  | -1.131549 | H | -3.242161 | -7.502767 | -1.817690 |
| O | 2.121217  | -0.347408 | -2.689042 | H | 0.364401  | -3.904415 | -5.076527 |
| N | 4.828246  | -0.036805 | -2.586027 | H | -3.661240 | -5.331258 | -6.942952 |
| C | 5.844501  | -1.082301 | -2.708100 | H | -4.031348 | -5.050134 | -5.234347 |
| C | 5.334385  | -2.465122 | -2.279473 | H | -3.826415 | -2.925404 | -7.434543 |
| C | 5.225158  | -2.688920 | -0.798681 | H | -5.179003 | -3.164412 | -6.318147 |
| C | 4.075837  | -2.926358 | -0.083598 | H | -3.204314 | -1.313297 | -5.744691 |
| C | 6.313570  | -2.766924 | 0.147753  | H | -3.909772 | -2.281951 | -4.446085 |
| C | 5.739255  | -3.053774 | 1.422247  | H | -1.640916 | -5.102368 | -5.114597 |
| C | 7.712514  | -2.646875 | 0.050934  | H | 2.480259  | 1.908891  | -4.339054 |
| N | 4.376751  | -3.129218 | 1.249283  | H | 1.935683  | 2.940134  | -3.045998 |
| C | 6.519901  | -3.215904 | 2.572960  | H | 3.976225  | 2.537009  | -1.748630 |
| C | 8.490538  | -2.808673 | 1.192569  | H | 6.031895  | -3.200529 | -2.703724 |
| C | 7.899435  | -3.089282 | 2.442320  | H | 4.366475  | -2.657084 | -2.757992 |
| C | -3.309700 | -4.233500 | 5.510699  | H | 3.043698  | -2.980929 | -0.404962 |
| C | -2.772849 | -4.386442 | 4.226322  | H | 8.183792  | -2.435142 | -0.905064 |
| C | -2.963992 | -3.090883 | 6.242024  | H | 9.571094  | -2.717431 | 1.123814  |
| C | -1.906841 | -3.433763 | 3.676950  | H | 6.062794  | -3.435190 | 3.533633  |
| C | -2.103101 | -2.132429 | 5.708199  | H | 8.531506  | -3.209747 | 3.317733  |
| C | -1.560327 | -2.293361 | 4.420092  | H | 6.721916  | -0.799571 | -2.114850 |
| O | -0.713318 | -1.326377 | 3.983277  | H | -3.025722 | -5.262618 | 3.634879  |
| C | -0.183000 | -6.769899 | 7.294000  | H | -3.367358 | -2.940224 | 7.239996  |
| C | 0.313234  | -5.515008 | 8.022679  | H | -1.492685 | -3.572747 | 2.682191  |
| C | 0.860926  | -4.468069 | 7.049626  | H | -1.835911 | -1.246679 | 6.276270  |
| C | -8.926598 | -1.359001 | -2.551700 | H | -0.381079 | -1.440578 | 3.056243  |
| C | -8.647884 | -2.864730 | -2.483299 | H | -0.508905 | -5.076485 | 8.601381  |
| C | -7.159431 | -3.255721 | -2.570868 | H | 1.700767  | -4.879921 | 6.479417  |
| C | 2.357101  | -6.826302 | 2.502600  | H | 0.085011  | -4.158572 | 6.342402  |
| C | 2.125579  | -5.611560 | 3.156338  | H | 0.623014  | -7.241707 | 6.721413  |
| C | 2.062560  | -6.907838 | 1.134705  | H | -9.187500 | -3.361377 | -3.301286 |
| C | 1.621044  | -4.501737 | 2.474143  | H | -6.746297 | -2.784579 | -3.476647 |
| C | 1.563554  | -5.813897 | 0.438349  | H | -8.469565 | -0.816539 | -1.718322 |
| C | 1.320680  | -4.558263 | 1.076412  | H | 2.231003  | -7.843236 | 0.602973  |
| O | 0.873180  | -3.536426 | 0.401406  | H | 2.341827  | -5.523467 | 4.219703  |
| C | -3.178899 | 8.340199  | 1.820599  | H | 1.336064  | -5.891546 | -0.620792 |
| C | -1.832069 | 8.992899  | 2.134973  | H | 1.428051  | -3.570243 | 3.002297  |
| C | -0.624510 | 8.238834  | 1.560024  | H | 0.661234  | -2.205070 | 1.059211  |
| O | -0.728857 | 6.937601  | 1.590676  | H | -1.795314 | 10.027019 | 1.778978  |
| O | 0.358418  | 8.863379  | 1.151890  | H | -1.689417 | 9.032071  | 3.224564  |
| C | -3.280597 | 5.735603  | 4.626406  | H | -3.374441 | 8.342771  | 0.741942  |
| C | -1.838597 | 5.369962  | 5.032528  | H | -4.115047 | 5.509097  | 6.619629  |
| O | -1.590374 | 4.879208  | 6.138789  | H | -5.323067 | 5.473683  | 5.317601  |
| C | -4.312900 | 5.163798  | 5.602395  | H | -3.353658 | 6.829772  | 4.590736  |
| N | -0.880006 | 5.634302  | 4.104878  | H | 1.240418  | 2.791191  | 2.200526  |
| C | 0.546696  | 5.438000  | 4.362998  | H | 0.608191  | 2.687161  | 3.856225  |
| C | 1.298794  | 4.666788  | 3.269779  | H | -0.364315 | 3.449463  | 2.585398  |
| C | 0.654547  | 3.315904  | 2.960180  | H | 0.620325  | 4.896837  | 5.308959  |

H -4.052549 4.882134 -2.217349  
H -4.020034 5.507155 -0.560288  
H -2.046321 2.921270 -2.544135  
H 0.734667 4.482031 0.225141  
H 0.232136 2.465727 -1.300496  
H -4.003166 8.875386 2.304917  
H -10.002966 -1.158164 -2.523901  
H 3.651089 -1.186864 -6.683998  
H 6.186583 -1.130842 -3.751148  
H 4.309830 3.161640 -3.355512  
H 2.751407 -7.682755 3.041718  
H -0.567419 -7.509318 8.004097  
H 1.039284 6.411155 4.495913  
H -3.981442 -4.978969 5.923980  
H -1.194343 6.023162 0.260471  
H 0.020411 0.066173 -3.609368  
H -0.988961 -6.523251 6.594629  
H -1.122020 6.115876 3.234920  
H 1.681558 -1.539783 -3.866897  
H 3.842877 -0.293171 -2.429108  
H 3.700369 -3.458358 1.928306  
C 0.420762 0.156390 -0.500761  
C 1.152712 -0.252458 0.797947  
H 1.244889 0.614415 1.462907  
H 0.491573 -0.704251 -1.178087  
C -1.070019 0.423222 -0.260038  
C -1.545860 0.996242 0.931732  
C -2.006719 0.091673 -1.253645  
C -2.898195 1.258260 1.122150  
H -0.857062 1.229692 1.733688  
C -3.364753 0.342373 -1.084533  
H -1.675858 -0.371426 -2.175855  
C -3.795988 0.932272 0.103745  
H -3.262834 1.699540 2.040998  
H -4.083840 0.086236 -1.852168  
H 2.172549 -0.550584 0.519770  
H -3.318408 6.458276 -1.876251  
H -3.198941 7.302793 2.155310  
H -3.466584 5.381882 3.605830  
H -8.533662 -0.928214 -3.480201  
H -1.449588 -4.353690 -6.715452  
H 2.303710 4.482273 3.675443  
H -4.280442 4.070787 5.612965  
O 1.503270 5.436587 2.083735  
H 0.731721 6.031943 1.915904  
H -9.065714 -3.274586 -1.552200  
C -7.008427 -4.776586 -2.723660  
H -5.955459 -5.064656 -2.816659  
H -7.417164 -5.298560 -1.849230  
H -7.538809 -5.145909 -3.608729  
C -6.349566 -2.754079 -1.365936  
H -6.388271 -1.666209 -1.258991  
H -6.728352 -3.195433 -0.435116  
H -5.295364 -3.037657 -1.459941  
H 1.093499 -5.788519 8.743744  
C 2.013268 -1.953806 6.541854  
H 1.190251 -1.736127 5.857096  
H 2.389825 -1.016985 6.958143  
H 2.822824 -2.451414 6.001832  
S 1.450470 -2.975944 7.951222  
N -5.216343 1.208628 0.288235  
O -5.583635 1.715575 1.352346  
O -5.994117 0.930335 -0.633417

**Prod-S-C1-r1**

C 2.782418 -0.262733 -6.150206  
C 1.732293 -1.371553 -6.100910  
O 1.224440 -1.829934 -7.127547  
N 1.372912 -1.815468 -4.858450  
C 0.232371 -2.714039 -4.681376  
C -1.074618 -1.926916 -4.886578  
O -1.178259 -0.767410 -4.431456  
C 0.307539 -3.357389 -3.275283  
C -0.706592 -4.454732 -3.036073  
C -0.490015 -5.746737 -3.539671  
C -1.877539 -4.213219 -2.306432  
C -1.423536 -6.764602 -3.334667  
C -2.813337 -5.228775 -2.097006  
C -2.592291 -6.506914 -2.614636  
N -2.096699 -2.513903 -5.539580  
C -2.125705 -3.844801 -6.211894  
C -3.609307 -4.028336 -6.552081  
C -4.101898 -2.594578 -6.802004  
C -3.358993 -1.774038 -5.741174  
C 3.937785 2.463505 -2.640627  
C 4.813932 1.356676 -3.242410  
O 5.228810 1.454128 -4.403306  
C 2.586052 2.586064 -3.373910  
C 1.748174 1.319813 -3.377929  
O 0.946886 1.342778 -0.004792  
O 2.083573 0.265394 -2.853452  
N 5.098846 0.294434 -2.442753  
C 5.823575 -0.884212 -2.917422  
C 5.143708 -2.218988 -2.580146  
C 5.133134 -2.586354 -1.122959  
C 4.015923 -2.834321 -0.360457  
C 6.271794 -2.834205 -0.266022  
C 5.756938 -3.223825 1.006558  
C 7.668212 -2.794969 -0.440909  
N 4.383552 -3.198275 0.919327  
C 6.589666 -3.557020 2.080913  
C 8.498397 -3.128203 0.624207  
C 7.964393 -3.503746 1.874375  
C -3.191761 -4.906967 5.071171  
C -2.923157 -4.705893 3.714732  
C -2.464085 -4.186558 6.022921  
C -1.934481 -3.811985 3.305370  
C -1.472400 -3.289803 5.629094  
C -1.191519 -3.101006 4.265147  
O -0.199019 -2.246388 3.930151  
C -0.034075 -7.609079 6.526285  
C 0.606925 -6.509778 7.382066  
C 1.387917 -5.509580 6.527780  
C -8.942725 -1.213528 -2.551222  
C -8.804307 -2.739595 -2.511676  
C -7.439530 -3.278781 -2.984219  
C 2.426971 -7.153995 1.714972  
C 2.101070 -6.041627 2.496109  
C 2.227023 -7.075911 0.330743  
C 1.592027 -4.875595 1.921949  
C 1.721640 -5.922446 -0.258635  
C 1.380147 -4.774482 0.514136  
O 0.920857 -3.690536 -0.061178  
C -3.131995 7.985701 2.724902  
C -1.795643 8.641668 3.073609  
C -0.581849 7.954928 2.426606

|   |           |           |           |   |           |           |           |
|---|-----------|-----------|-----------|---|-----------|-----------|-----------|
| O | -0.675314 | 6.660626  | 2.338312  | H | -1.784593 | 9.700610  | 2.796824  |
| O | 0.391027  | 8.631160  | 2.072951  | H | -1.639447 | 8.602046  | 4.161532  |
| C | -3.185501 | 5.099885  | 5.241895  | H | -3.341800 | 8.069985  | 1.652238  |
| C | -1.740786 | 4.679161  | 5.576884  | H | -3.981497 | 4.928978  | 7.261024  |
| O | -1.492974 | 3.959852  | 6.551279  | H | -5.214488 | 4.887889  | 5.985017  |
| C | -4.203799 | 4.565810  | 6.254107  | H | -3.227014 | 6.194281  | 5.197511  |
| N | -0.783382 | 5.158444  | 4.740575  | H | 0.970395  | 2.552299  | 2.262322  |
| C | 0.637196  | 4.841402  | 4.886509  | H | 0.352986  | 2.252910  | 3.904408  |
| C | 1.285248  | 4.200448  | 3.644939  | H | -0.519429 | 3.335420  | 2.806556  |
| C | 0.477229  | 3.011526  | 3.121973  | H | 0.715831  | 4.159140  | 5.736206  |
| C | -3.458855 | 5.450747  | -0.872992 | H | -4.063988 | 4.994529  | -1.660291 |
| C | -2.090665 | 4.847172  | -0.868520 | H | -3.975270 | 5.293168  | 0.081051  |
| C | -1.513617 | 3.871075  | -1.648812 | H | -1.962028 | 3.324906  | -2.467173 |
| N | -1.104438 | 5.211051  | 0.028628  | H | 0.884540  | 4.527624  | 0.373140  |
| C | -0.009620 | 4.457565  | -0.231166 | H | 0.532572  | 2.000522  | -0.608073 |
| N | -0.213486 | 3.626879  | -1.244473 | H | -3.962488 | 8.459743  | 3.260399  |
| O | 0.607984  | 1.456972  | -4.063330 | H | -9.952349 | -0.905195 | -2.258616 |
| O | 0.012848  | -1.889966 | 1.371356  | H | 3.390892  | -0.403441 | -7.045295 |
| H | 3.425623  | -0.224753 | -5.272234 | H | 5.915949  | -0.770515 | -3.999868 |
| H | 2.264582  | 0.697207  | -6.244530 | H | 4.478168  | 3.407413  | -2.750828 |
| H | 1.317826  | -3.763194 | -3.167456 | H | 2.823514  | -8.056798 | 2.170518  |
| H | 0.201399  | -2.582810 | -2.511748 | H | -0.576509 | -8.325528 | 7.151946  |
| H | 0.422713  | -5.958053 | -4.092068 | H | 1.198369  | 5.752802  | 5.131761  |
| H | -2.049122 | -3.227273 | -1.883787 | H | -3.963673 | -5.604947 | 5.381378  |
| H | -1.233553 | -7.758757 | -3.729352 | H | -1.146568 | 5.872656  | 0.820510  |
| H | -3.709650 | -5.022790 | -1.519304 | H | 0.102622  | 0.604174  | -4.079091 |
| H | -3.317375 | -7.298031 | -2.447088 | H | -0.744318 | -7.183753 | 5.809887  |
| H | 0.316122  | -3.488671 | -5.446354 | H | -1.035058 | 5.741199  | 3.937035  |
| H | -3.751845 | -4.692198 | -7.408385 | H | 1.672671  | -1.277161 | -4.047660 |
| H | -4.132580 | -4.464341 | -5.694078 | H | 4.610864  | 0.217272  | -1.561088 |
| H | -3.808890 | -2.264356 | -7.804792 | H | 3.735887  | -3.580078 | 1.596843  |
| H | -5.186430 | -2.491210 | -6.717070 | C | 0.229059  | 0.114148  | -0.043138 |
| H | -3.143980 | -0.747707 | -6.046035 | C | 0.730718  | -0.690879 | 1.166536  |
| H | -3.914900 | -1.730864 | -4.796364 | H | 0.632976  | -0.062879 | 2.060531  |
| H | -1.746074 | -4.624947 | -5.553160 | H | 0.478854  | -0.439372 | -0.959932 |
| H | 2.748600  | 2.868686  | -4.419726 | C | -1.278321 | 0.331631  | -0.036197 |
| H | 1.974025  | 3.374903  | -2.923043 | C | -1.941857 | 0.856234  | 1.085329  |
| H | 3.760960  | 2.295544  | -1.573870 | C | -2.024812 | 0.047189  | -1.189090 |
| H | 5.682726  | -2.990226 | -3.148948 | C | -3.312550 | 1.082694  | 1.065521  |
| H | 4.118625  | -2.208234 | -2.966336 | H | -1.382662 | 1.088614  | 1.984410  |
| H | 2.965585  | -2.822762 | -0.624169 | C | -3.397482 | 0.273459  | -1.233229 |
| H | 8.099023  | -2.516454 | -1.398666 | H | -1.531000 | -0.343234 | -2.073982 |
| H | 9.576600  | -3.100426 | 0.493180  | C | -4.025591 | 0.787462  | -0.099726 |
| H | 6.174436  | -3.850814 | 3.040662  | H | -3.832491 | 1.479988  | 1.927818  |
| H | 8.636925  | -3.757946 | 2.688728  | H | -3.974280 | 0.063425  | -2.124577 |
| H | 6.840445  | -0.876123 | -2.505106 | H | 1.804653  | -0.877652 | 1.021036  |
| H | -3.486224 | -5.252796 | 2.962871  | H | -3.430220 | 6.531795  | -1.054485 |
| H | -2.668780 | -4.322228 | 7.081766  | H | -3.123135 | 6.924192  | 2.971934  |
| H | -1.727811 | -3.656889 | 2.251428  | H | -3.423726 | 4.746028  | 4.231077  |
| H | -0.900917 | -2.729002 | 6.362283  | H | -8.761383 | -0.830297 | -3.562642 |
| H | -0.128354 | -2.157608 | 2.925377  | H | -1.505483 | -3.808305 | -7.115754 |
| H | -0.173451 | -5.976019 | 7.937611  | H | 2.266399  | 3.832932  | 3.978169  |
| H | 2.201226  | -6.013859 | 5.994410  | H | -4.186628 | 3.473529  | 6.288005  |
| H | 0.724091  | -5.046999 | 5.791103  | O | 1.572417  | 5.151308  | 2.623327  |
| H | 0.721808  | -8.164808 | 5.960371  | H | 0.783665  | 5.731301  | 2.478520  |
| H | -9.589644 | -3.183145 | -3.139049 | H | -8.992490 | -3.101241 | -1.490309 |
| H | -7.245348 | -2.854485 | -3.981675 | C | -7.479999 | -4.807595 | -3.124511 |
| H | -8.238687 | -0.714300 | -1.879166 | H | -6.521467 | -5.200574 | -3.481418 |
| H | 2.472309  | -7.930176 | -0.298219 | H | -7.691615 | -5.281583 | -2.157800 |
| H | 2.241795  | -6.080219 | 3.574214  | H | -8.257703 | -5.125978 | -3.827947 |
| H | 1.563172  | -5.874378 | -1.332231 | C | -6.290218 | -2.853953 | -2.058147 |
| H | 1.323349  | -4.030180 | 2.549713  | H | -6.211300 | -1.767161 | -1.964490 |
| H | 0.417187  | -2.673099 | 0.775130  | H | -6.435091 | -3.264257 | -1.050451 |

H -5.329964 -3.227284 -2.431072  
N -5.464779 1.029335 -0.134543  
O -6.014605 1.456286 0.883943  
O -6.071668 0.798608 -1.188171  
H 1.274037 -6.959012 8.128463  
S 2.107302 -4.165568 7.558682  
C 2.728696 -3.062376 6.237533  
H 1.913583 -2.740109 5.584550  
H 3.163976 -2.188964 6.727742  
H 3.502677 -3.559607 5.647283

**TS1-S-C2-r1**

C 3.219600 0.461800 -5.847400  
C 2.500999 -0.884537 -5.802901  
O 2.446475 -1.612539 -6.799838  
N 1.916516 -1.219467 -4.614811  
C 1.169800 -2.465200 -4.468900  
C -0.346345 -2.195900 -4.513915  
O -0.831964 -1.276399 -3.831458  
C 1.550740 -3.187080 -3.149783  
C 1.015004 -4.600590 -3.066428  
C 1.767697 -5.674306 -3.565410  
C -0.248243 -4.869789 -2.520471  
C 1.271501 -6.979212 -3.528986  
C -0.750462 -6.171990 -2.486421  
C 0.006916 -7.231584 -2.992024  
N -1.128953 -2.982854 -5.284370  
C -0.735700 -4.143100 -6.122700  
C -2.080905 -4.790215 -6.478070  
C -3.051042 -3.599579 -6.519432  
C -2.579848 -2.722098 -5.354034  
C 3.431400 3.472200 -2.386700  
C 4.786298 2.749106 -2.445676  
O 5.830011 3.406037 -2.541657  
C 2.142178 2.669089 -2.672628  
C 1.847260 1.498862 -1.709785  
O 1.352734 1.790205 -0.575780  
O 2.140437 0.323136 -2.084433  
N 4.791999 1.394364 -2.352882  
C 6.037200 0.634900 -2.366600  
C 5.812331 -0.863878 -2.659232  
C 5.674662 -1.729614 -2.439456  
C 4.523654 -2.062955 -0.765127  
C 6.757975 -2.358641 -0.724146  
C 6.183801 -3.064557 0.372221  
C 8.153047 -2.404797 -0.903637  
N 4.824185 -2.860448 0.321673  
C 6.960085 -3.806444 1.271320  
C 8.927160 -3.137093 -0.011067  
C 8.335416 -3.831600 1.066086  
C -2.489200 -5.118100 5.082100  
C -2.054076 -4.968737 3.762397  
C -2.242252 -4.088038 5.995856  
C -1.377105 -3.817908 3.352590  
C -1.567978 -2.933244 5.601868  
C -1.125465 -2.791279 4.276681  
O -0.451013 -1.654373 3.959396  
C 1.059400 -6.991200 6.895400  
C 1.405973 -5.718770 7.677559  
C 1.787899 -4.563818 6.749145  
C -8.254700 -3.034500 -3.117400  
C -7.777916 -4.003415 -2.030123  
C -6.475264 -3.592586 -1.315520

C 3.754500 -6.117000 2.271100  
C 3.354574 -4.923478 2.875842  
C 3.154636 -6.503638 1.067776  
C 2.376853 -4.113669 2.287803  
C 2.180335 -5.710255 0.469246  
C 1.785933 -4.501805 1.070799  
O 0.843693 -3.761384 0.447659  
C -5.126600 7.382900 2.166500  
C -3.913217 7.675828 1.278320  
C -2.737688 6.737679 1.579879  
O -2.995683 5.483144 1.597450  
O -1.614997 7.249967 1.806886  
C -4.744200 4.628900 4.799900  
C -3.299334 4.743559 5.322087  
O -3.048304 4.627875 6.528981  
C -5.629500 3.736700 5.677000  
N -2.348564 5.013311 4.389843  
C -0.945000 5.237300 4.750300  
C 0.094645 4.751790 3.716377  
C -0.262299 3.399917 3.087659  
C -4.569700 4.744900 -1.327600  
C -3.241825 4.153877 -1.662436  
C -2.734317 3.531873 -2.779865  
N -2.207056 4.152855 -0.751879  
C -1.143620 3.541971 -1.330087  
N -1.425151 3.151487 -2.566307  
O -0.288506 1.530679 -4.691848  
O 0.320643 -1.392488 1.387167  
H 3.699067 0.714108 -4.899158  
H 2.480781 1.240075 -6.066921  
H 2.643684 -3.201415 -3.096621  
H 1.192600 -2.592385 -2.304480  
H 2.753959 -5.484373 -3.981918  
H -0.833285 -4.055160 -2.105036  
H 1.873080 -7.796738 -3.916317  
H -1.729786 -6.359971 -2.055403  
H -0.381670 -8.245428 -2.960494  
H 1.466796 -3.083221 -5.317256  
H -2.031572 -5.345681 -7.417990  
H -2.373762 -5.488081 -5.686069  
H -2.942180 -3.057310 -7.465232  
H -4.098808 -3.893202 -6.418208  
H -2.759683 -1.654920 -5.501316  
H -3.055104 -3.010495 -4.407880  
H -0.079168 -4.819434 -5.574129  
H 2.152807 2.271996 -3.688670  
H 1.303815 3.367067 -2.617365  
H 3.368406 3.918922 -1.385953  
H 6.667379 -1.221034 -3.244571  
H 4.937452 -0.976132 -3.309499  
H 3.503473 -1.775648 -0.979151  
H 8.620983 -1.873922 -1.728599  
H 10.005039 -3.177357 -0.141172  
H 6.500114 -4.345811 2.093643  
H 8.965534 -4.397226 1.746721  
H 6.569669 0.752582 -1.413648  
H -2.238647 -5.756922 3.037361  
H -2.577704 -4.181319 7.025242  
H -1.032626 -3.718401 2.327874  
H -1.373053 -2.130453 6.306068  
H -0.240500 -1.599535 2.991869  
H 0.548384 -5.420312 8.292736  
H 2.661015 -4.832441 6.144351



H 0.961035 -4.329321 6.071485  
H 1.905127 -7.324538 6.283933  
H -7.629105 -4.994555 -2.479744  
H -5.706613 -3.441469 -2.089278  
H -8.505289 -2.050666 -2.708596  
H 3.454087 -7.430701 0.586451  
H 3.805882 -4.610470 3.813331  
H 1.717643 -5.998656 -0.468298  
H 2.061523 -3.191732 2.767371  
H 0.730378 -2.858558 0.875024  
H -4.191169 7.539738 0.224903  
H -3.577744 8.710327 1.397761  
H -5.449633 6.346731 2.045458  
H -5.592000 4.068344 6.717307  
H -6.667644 3.768118 5.333150  
H -5.153928 5.647079 4.781027  
H 0.548454 3.087760 2.422331  
H -0.408279 2.626823 3.851133  
H -1.177832 3.475832 2.495407  
H -0.788936 4.717970 5.699893  
H -5.386672 4.087687 -1.640562  
H -4.644370 4.902313 -0.249032  
H -3.234602 3.331994 -3.718015  
H -0.209872 3.359395 -0.817316  
H -0.585198 2.094908 -3.944323  
H -5.968030 8.039954 1.920005  
H -9.149012 -3.418149 -3.619996  
H 3.958634 0.436746 -6.648737  
H 6.681748 1.077406 -3.133795  
H 3.505500 4.306849 -3.089404  
H 4.515141 -6.738666 2.732802  
H 0.794704 -7.808212 7.574448  
H -0.757534 6.304866 4.930237  
H -3.016963 -6.015159 5.390671  
H -2.279570 4.564274 0.190857  
H -0.377795 0.626520 -4.349738  
H 0.209174 -6.821111 6.226242  
H -2.621871 5.114056 3.407507  
H 1.937389 -0.568140 -3.824821  
H 3.914009 0.880282 -2.279312  
H 4.146104 -3.254886 0.960642  
C -0.144880 -0.659468 0.254376  
C 1.030555 0.103393 0.679214  
H 0.937084 0.807756 1.491259  
H -0.008765 -1.189532 -0.692151  
C -1.530168 -0.079855 0.346544  
C -2.068844 0.335138 1.573652  
C -2.300792 0.029829 -0.819707  
C -3.349956 0.870536 1.638198  
H -1.493717 0.223184 2.485495  
C -3.586872 0.558353 -0.770862  
H -1.893375 -0.303789 -1.769916  
C -4.092284 0.974754 0.460602  
H -3.778151 1.198879 2.576291  
H -4.190975 0.656073 -1.662533  
H 2.000931 -0.235897 0.360884  
H -4.724069 5.715935 -1.815045  
H -4.883792 7.537640 3.223484  
H -4.739855 4.285734 3.759948  
H -7.482271 -2.887786 -3.881504  
H -0.208226 -3.793402 -7.018801  
H 1.023653 4.619411 4.290493  
H -5.294546 2.694735 5.647944

O 0.409950 5.720961 2.732057  
H -0.409529 6.142806 2.368125  
H -8.569702 -4.128662 -1.277093  
C -5.992687 -4.718649 -0.389111  
H -5.840848 -5.653419 -0.940648  
H -5.046736 -4.456794 0.096835  
H -6.727852 -4.914510 0.401517  
C -6.620684 -2.278879 -0.533321  
H -6.887162 -1.436082 -1.177764  
H -7.397238 -2.369757 0.236826  
H -5.683622 -2.019576 -0.029485  
N -5.443316 1.531802 0.521383  
O -5.851741 1.960115 1.604025  
O -6.116922 1.546872 -0.514602  
H 2.232649 -5.922017 8.369592  
S 2.185953 -3.049286 7.715330  
C 2.526092 -1.878218 6.351597  
H 1.653213 -1.761751 5.704492  
H 2.761567 -0.915475 6.810132  
H 3.385299 -2.207656 5.761648

**Int1-S-C2-r1**

C 3.017102 0.337702 -5.974100  
C 2.270959 -0.993487 -5.943046  
O 2.188239 -1.713161 -6.941240  
N 1.695100 -1.326735 -4.748110  
C 0.863379 -2.516900 -4.602200  
C -0.626405 -2.124641 -4.669314  
O -1.038598 -1.147705 -4.017118  
C 1.177239 -3.252574 -3.274615  
C 0.518700 -4.611970 -3.173296  
C 1.149859 -5.748175 -3.701151  
C -0.740269 -4.763546 -2.576121  
C 0.536939 -7.001402 -3.643061  
C -1.359021 -6.013926 -2.521233  
C -0.723476 -7.136852 -3.056160  
N -1.468187 -2.860129 -5.422699  
C -1.166585 -4.061405 -6.237703  
C -2.557357 -4.619442 -6.566768  
C -3.440623 -3.363834 -6.631887  
C -2.896126 -2.490925 -5.495298  
C 3.470800 3.253598 -2.456198  
C 4.771712 2.455593 -2.619181  
O 5.831155 3.060645 -2.807387  
C 2.089202 2.549085 -2.560567  
C 1.832904 1.332808 -1.681970  
O 1.408809 1.601580 -0.445959  
O 2.018282 0.179502 -2.070624  
N 4.726579 1.105714 -2.490381  
C 5.933000 0.293001 -2.571000  
C 5.631236 -1.216242 -2.598756  
C 5.472166 -1.862624 -1.252799  
C 4.316184 -2.325203 -0.668412  
C 6.537385 -2.162707 -0.326368  
C 5.944529 -2.809788 0.796731  
C 7.931162 -1.966321 -0.337177  
N 4.591893 -2.886219 0.560502  
C 6.702631 -3.255978 1.886594  
C 8.685970 -2.406701 0.744187  
C 8.076645 -3.044978 1.845775  
C -2.662299 -5.207698 4.988300  
C -2.088912 -5.089212 3.718017  
C -2.566240 -4.127493 5.872398

|   |           |           |           |   |           |           |           |
|---|-----------|-----------|-----------|---|-----------|-----------|-----------|
| C | -1.423619 | -3.924108 | 3.326651  | H | 6.231656  | -3.753544 | 2.728896  |
| C | -1.905962 | -2.957609 | 5.498662  | H | 8.692090  | -3.379113 | 2.676283  |
| C | -1.324970 | -2.848009 | 4.223923  | H | 6.597056  | 0.529513  | -1.730848 |
| O | -0.674440 | -1.690765 | 3.932509  | H | -2.153189 | -5.916332 | 3.015675  |
| C | 0.837287  | -7.292802 | 6.659917  | H | -3.008134 | -4.193525 | 6.863201  |
| C | 1.285528  | -6.054437 | 7.445341  | H | -0.970450 | -3.849741 | 2.340933  |
| C | 1.503997  | -4.845537 | 6.532356  | H | -1.827929 | -2.116737 | 6.181088  |
| C | -8.537700 | -2.657298 | -2.998698 | H | -0.317187 | -1.665727 | 3.006755  |
| C | -7.904845 | -3.854805 | -2.282075 | H | 0.532326  | -5.806294 | 8.203262  |
| C | -6.405051 | -3.705003 | -1.958107 | H | 2.263571  | -5.070615 | 5.776123  |
| C | 3.446115  | -6.444698 | 1.981480  | H | 0.576894  | -4.581044 | 6.014396  |
| C | 3.155289  | -5.289327 | 2.711975  | H | 1.585196  | -7.579960 | 5.912743  |
| C | 2.768348  | -6.657271 | 0.773603  | H | -8.037836 | -4.750343 | -2.904278 |
| C | 2.220211  | -4.356933 | 2.251041  | H | -5.883257 | -3.480129 | -2.901521 |
| C | 1.834335  | -5.743125 | 0.300909  | H | -8.513785 | -1.752519 | -2.383437 |
| C | 1.525980  | -4.551069 | 1.019324  | H | 2.977010  | -7.552067 | 0.189951  |
| O | 0.643072  | -3.701694 | 0.555178  | H | 3.665717  | -5.103910 | 3.655434  |
| C | -4.757497 | 7.470799  | 2.419797  | H | 1.315165  | -5.914728 | -0.637036 |
| C | -3.670197 | 8.047395  | 1.509910  | H | 1.997195  | -3.469615 | 2.838302  |
| C | -2.271861 | 7.432858  | 1.705383  | H | 0.597378  | -2.449113 | 1.124986  |
| O | -2.237243 | 6.143361  | 1.878525  | H | -3.950179 | 7.881372  | 0.459659  |
| O | -1.281242 | 8.173138  | 1.658449  | H | -3.579884 | 9.130334  | 1.639796  |
| C | -4.440298 | 4.641509  | 4.981096  | H | -4.849277 | 6.392416  | 2.272051  |
| C | -2.971319 | 4.592243  | 5.441149  | H | -5.230914 | 3.963883  | 6.886569  |
| O | -2.669078 | 4.169581  | 6.563763  | H | -6.371197 | 3.805475  | 5.531894  |
| C | -5.321201 | 3.715291  | 5.827102  | H | -4.785447 | 5.679320  | 5.070582  |
| N | -2.053776 | 5.047929  | 4.551113  | H | 0.487286  | 2.774806  | 2.449901  |
| C | -0.618498 | 5.065001  | 4.837706  | H | -0.144343 | 2.401863  | 4.070227  |
| C | 0.248530  | 4.518296  | 3.689210  | H | -1.200047 | 3.131550  | 2.845642  |
| C | -0.181097 | 3.119585  | 3.242651  | H | -0.471527 | 4.465710  | 5.739136  |
| C | -4.426204 | 4.890001  | -1.144900 | H | -5.063143 | 4.596280  | -1.983026 |
| C | -3.039327 | 4.395320  | -1.361903 | H | -4.866396 | 4.474962  | -0.230708 |
| C | -2.468430 | 3.675842  | -2.384566 | H | -2.937557 | 3.322827  | -3.292866 |
| N | -2.026907 | 4.585224  | -0.444981 | H | 0.019899  | 3.973179  | -0.393412 |
| C | -0.914543 | 3.983346  | -0.935616 | H | -0.537600 | 2.194316  | -3.588550 |
| N | -1.140390 | 3.416593  | -2.112876 | H | -5.730603 | 7.931460  | 2.216841  |
| O | -0.360304 | 1.689684  | -4.407958 | H | -9.585425 | -2.857551 | -3.247257 |
| O | 0.507940  | -1.440816 | 1.497834  | H | 3.660176  | 0.358303  | -6.853775 |
| H | 3.612590  | 0.499328  | -5.071989 | H | 6.475848  | 0.578827  | -3.479779 |
| H | 2.286858  | 1.151593  | -6.042877 | H | 3.497595  | 4.045217  | -3.208775 |
| H | 2.265018  | -3.360912 | -3.219919 | H | 4.177604  | -7.161008 | 2.343386  |
| H | 0.867880  | -2.621975 | -2.435838 | H | 0.684768  | -8.146803 | 7.327892  |
| H | 2.132609  | -5.649255 | -4.155843 | H | -0.286855 | 6.089284  | 5.055975  |
| H | -1.229634 | -3.899110 | -2.137720 | H | -3.178459 | -6.117320 | 5.279566  |
| H | 1.044857  | -7.870462 | -4.051677 | H | -2.099370 | 5.128009  | 0.434482  |
| H | -2.332930 | -6.112271 | -2.050165 | H | -0.574605 | 0.766014  | -4.194789 |
| H | -1.201813 | -8.110813 | -3.007254 | H | -0.104172 | -7.104127 | 6.132863  |
| H | 1.123075  | -3.159689 | -5.444264 | H | -2.354553 | 5.427045  | 3.649796  |
| H | -2.556240 | -5.199800 | -7.492755 | H | 1.708793  | -0.662610 | -3.979123 |
| H | -2.891297 | -5.274950 | -5.755240 | H | 3.844021  | 0.621859  | -2.386859 |
| H | -3.304695 | -2.856336 | -7.593366 | H | 3.908915  | -3.354172 | 1.149820  |
| H | -4.505240 | -3.579120 | -6.512346 | C | 0.320453  | -0.589980 | 0.380234  |
| H | -2.996239 | -1.417994 | -5.673346 | C | 1.400711  | 0.507221  | 0.528463  |
| H | -3.383166 | -2.714827 | -4.538084 | H | 1.273774  | 1.014060  | 1.484522  |
| H | -0.553728 | -4.770624 | -5.680881 | H | 0.532657  | -1.146168 | -0.537804 |
| H | 1.905646  | 2.212702  | -3.581647 | C | -1.103882 | -0.066477 | 0.283113  |
| H | 1.322234  | 3.292869  | -2.339903 | C | -1.786567 | 0.397942  | 1.418723  |
| H | 3.554048  | 3.754454  | -1.483976 | C | -1.765178 | -0.080363 | -0.952568 |
| H | 6.465499  | -1.697744 | -3.124368 | C | -3.091740 | 0.866132  | 1.321896  |
| H | 4.744048  | -1.399336 | -3.216802 | H | -1.303253 | 0.375253  | 2.388449  |
| H | 3.300715  | -2.295888 | -1.036547 | C | -3.076847 | 0.370439  | -1.066039 |
| H | 8.414615  | -1.478924 | -1.179807 | H | -1.259184 | -0.451468 | -1.838448 |
| H | 9.762295  | -2.258727 | 0.744443  | C | -3.720430 | 0.847330  | 0.074797  |

H -3.625185 1.235153 2.188418  
H -3.592545 0.365453 -2.017136  
H 2.376964 0.019280 0.499934  
H -4.466598 5.982350 -1.059816  
H -4.520792 7.644052 3.475340  
H -4.502256 4.388351 3.917152  
H -8.011755 -2.434413 -3.934544  
H -0.626366 -3.768367 -7.146591  
H -5.022158 2.669826 5.706324  
H 1.268094 4.451802 4.095477  
O 0.341372 5.411821 2.589218  
H -0.563616 5.693231 2.306921  
H 2.213522 -6.275733 7.987110  
S 2.062601 -3.386266 7.505252  
C 2.290278 -2.164940 6.162090  
H 2.611567 -1.232969 6.632229  
H 3.065847 -2.494825 5.466003  
H 1.357974 -1.989336 5.620104  
N -5.085964 1.352301 -0.039685  
O -5.597180 1.888210 0.949088  
O -5.668809 1.230210 -1.122311  
H -8.449377 -4.052608 -1.347289  
C -6.123806 -2.555734 -0.978665  
H -5.053929 -2.487297 -0.754755  
H -6.435536 -1.583950 -1.372357  
H -6.650477 -2.717875 -0.029573  
C -5.840686 -5.025501 -1.413213  
H -5.993421 -5.848825 -2.120215  
H -4.766469 -4.946506 -1.213447  
H -6.331873 -5.299956 -0.471370

**TS2-S-C2-r1**

C 3.113145 -0.028190 -5.911629  
C 2.220511 -1.268244 -5.823482  
O 1.965552 -1.938611 -6.830461  
N 1.741463 -1.577168 -4.586473  
C 0.923801 -2.765003 -4.365986  
C -0.573507 -2.423002 -4.376292  
O -0.998038 -1.452934 -3.717909  
C 1.313341 -3.476570 -3.042317  
C 0.746706 -4.877005 -2.939039  
C 1.420619 -5.959821 -3.523857  
C -0.470374 -5.121310 -2.288131  
C 0.887804 -7.249102 -3.474232  
C -1.009866 -6.408883 -2.241471  
C -0.334601 -7.476692 -2.837237  
N -1.414745 -3.203886 -5.088030  
C -1.100369 -4.407160 -5.910388  
C -2.484667 -4.995514 -6.210527  
C -3.400344 -3.762589 -6.250180  
C -2.855749 -2.885166 -5.117815  
C 3.551597 3.125093 -2.602781  
C 4.870406 2.334060 -2.682655  
O 5.931341 2.936835 -2.895626  
C 2.208311 2.443169 -2.988252  
C 1.677352 1.193820 -2.222962  
O 1.269795 1.556463 -0.923779  
O 2.255469 0.061487 -2.347347  
N 4.810952 0.999987 -2.457398  
C 5.992888 0.147530 -2.482189  
C 5.678394 -1.305964 -2.906604  
C 5.480151 -2.271452 -1.771351  
C 4.344464 -2.469586 -1.018672

C 6.478612 -3.161079 -1.232189  
C 5.869648 -3.874455 -0.158356  
C 7.822044 -3.435320 -1.550950  
N 4.572578 -3.429711 -0.054746  
C 6.560724 -4.841861 0.582532  
C 8.512313 -4.391055 -0.814569  
C 7.886379 -5.088060 0.241960  
C -2.720998 -4.750203 5.351092  
C -2.178405 -4.804209 4.061685  
C -2.553404 -3.578459 6.097650  
C -1.477445 -3.722896 3.517696  
C -1.858597 -2.490079 5.570699  
C -1.312600 -2.553164 4.276925  
O -0.634728 -1.459361 3.838366  
C 0.745545 -6.735587 7.203234  
C 1.360876 -5.449619 7.768352  
C 1.537665 -4.375669 6.691752  
C -8.493305 -2.729799 -2.859293  
C -7.727982 -4.011441 -2.512888  
C -6.247779 -3.804579 -2.135115  
C 3.409156 -6.236319 2.505675  
C 3.301475 -4.898442 2.899850  
C 2.546016 -6.703678 1.503356  
C 2.366475 -4.041399 2.311513  
C 1.606920 -5.867721 0.911578  
C 1.474784 -4.497214 1.291958  
O 0.578468 -3.726913 0.733025  
C -4.695767 7.729495 1.874391  
C -3.220189 8.148375 1.808789  
C -2.484085 7.228257 0.834379  
O -2.156598 6.064079 1.318993  
O -2.312562 7.578183 -0.341677  
C -4.426211 5.085493 4.631678  
C -2.960768 5.085407 5.101990  
O -2.676578 4.875651 6.287162  
C -5.307692 4.168398 5.488610  
N -2.019248 5.345447 4.155651  
C -0.600012 5.472602 4.500588  
C 0.368577 5.019270 3.397845  
C 0.116178 3.585883 2.926359  
C -4.346379 4.901852 -1.496100  
C -3.065994 4.154612 -1.626224  
C -2.643882 3.186136 -2.503222  
N -2.018009 4.348987 -0.750838  
C -1.022477 3.518795 -1.098385  
N -1.366594 2.794881 -2.159510  
O 0.193578 1.087988 -3.073417  
O 0.596804 -1.315624 1.344863  
H 3.424728 0.345564 -4.936101  
H 2.569758 0.761205 -6.440785  
H 2.406423 -3.514994 -3.011561  
H 0.985900 -2.876804 -2.188325  
H 2.373789 -5.789822 -4.018873  
H -0.981723 -4.302892 -1.791558  
H 1.428397 -8.074747 -3.928536  
H -1.952683 -6.578698 -1.728944  
H -0.751540 -8.478897 -2.796043  
H 1.147507 -3.431932 -5.200764  
H -2.489827 -5.571759 -7.139118  
H -2.785362 -5.662526 -5.395368  
H -3.294692 -3.244822 -7.210010  
H -4.456841 -4.005584 -6.112439  
H -2.996941 -1.814297 -5.279137

H -3.311324 -3.138158 -4.151981  
H -0.461317 -5.099537 -5.362786  
H 2.247863 2.141877 -4.037399  
H 1.436282 3.214919 -2.920580  
H 3.484562 3.508496 -1.575840  
H 6.512051 -1.663849 -3.521029  
H 4.802911 -1.300935 -3.564802  
H 3.381774 -1.984302 -1.099919  
H 8.315682 -2.905688 -2.361940  
H 9.549942 -4.607990 -1.053395  
H 6.068890 -5.380882 1.386568  
H 8.450319 -5.831879 0.798077  
H 6.486990 0.142864 -1.500952  
H -2.295245 -5.704479 3.463703  
H -2.967105 -3.507186 7.100227  
H -1.046990 -3.781643 2.520023  
H -1.728250 -1.578889 6.146592  
H -0.302297 -1.533395 2.909727  
H 0.722884 -5.058169 8.570443  
H 2.191845 -4.736348 5.890744  
H 0.572274 -4.111574 6.249138  
H 1.380890 -7.167993 6.422583  
H -7.775263 -4.695120 -3.371466  
H -5.769093 -3.257694 -2.962545  
H -8.553638 -2.046423 -2.006689  
H 2.610992 -7.740934 1.179409  
H 3.961568 -4.509258 3.672974  
H 0.944917 -6.240830 0.135455  
H 2.294942 -3.004856 2.631178  
H 0.619559 -2.337601 1.074924  
H -3.134632 9.182727 1.462427  
H -2.766797 8.074549 2.803094  
H -5.169653 7.835556 0.892598  
H -5.213828 4.430118 6.544686  
H -6.357436 4.257597 5.193704  
H -4.787945 6.119753 4.697422  
H 0.872872 3.302700 2.188985  
H 0.162437 2.878037 3.761480  
H -0.868735 3.496702 2.459346  
H -0.439664 4.880253 5.405214  
H -4.995014 4.698715 -2.351682  
H -4.887522 4.611842 -0.587490  
H -3.170176 2.747726 -3.338010  
H -0.079301 3.438770 -0.583711  
H -0.591493 1.838410 -2.651557  
H -5.257087 8.345712 2.584994  
H -9.518306 -2.956695 -3.171457  
H 3.992868 -0.280564 -6.508533  
H 6.700285 0.604615 -3.181715  
H 3.686186 3.995985 -3.248607  
H 4.136426 -6.896512 2.968792  
H 0.619026 -7.488091 7.988467  
H -0.360496 6.516452 4.748120  
H -3.264669 -5.596380 5.759485  
H -2.008872 5.039034 0.047714  
H -0.105195 0.154363 -3.108780  
H -0.237404 -6.539642 6.761344  
H -2.294855 5.592498 3.200485  
H 1.940839 -0.955985 -3.790967  
H 3.893931 0.553535 -2.331376  
H 3.895058 -3.732851 0.638814  
C 0.281935 -0.530680 0.196267  
C 1.368245 0.573794 0.122325

H 1.337904 1.155317 1.047712  
H 0.367285 -1.143832 -0.708184  
C -1.150384 -0.027280 0.288506  
C -1.583238 0.688284 1.417296  
C -2.077478 -0.323534 -0.720366  
C -2.894127 1.135636 1.523449  
H -0.890350 0.885153 2.227130  
C -3.399059 0.103105 -0.626472  
H -1.766791 -0.888613 -1.593811  
C -3.788327 0.838664 0.491772  
H -3.231163 1.699496 2.383832  
H -4.119118 -0.114949 -1.404422  
H 2.331978 0.063631 0.061787  
H -4.161414 5.979427 -1.440990  
H -4.791540 6.685551 2.181229  
H -4.479814 4.802129 3.574924  
H -8.007942 -2.190632 -3.681285  
H -0.583243 -4.099595 -6.827259  
H -8.234292 -4.529366 -1.685276  
C -5.535035 -5.157799 -1.994246  
H -4.470390 -5.025539 -1.772547  
H -5.972386 -5.746122 -1.177901  
H -5.617121 -5.750781 -2.912221  
C -6.076055 -2.970060 -0.856833  
H -6.496438 -1.964579 -0.953310  
H -6.567735 -3.459150 -0.006206  
H -5.016389 -2.856051 -0.604391  
H 1.367131 5.063209 3.853604  
O 0.419479 5.931901 2.308433  
H -0.467167 5.959237 1.886578  
H -5.011620 3.120798 5.376106  
N -5.163639 1.319440 0.581150  
O -5.459058 2.082737 1.506643  
O -5.972963 0.948592 -0.276175  
H 2.333353 -5.673900 8.223980  
S 2.278837 -2.852690 7.414299  
C 2.431499 -1.814239 5.915332  
H 2.832553 -0.850778 6.237482  
H 3.124598 -2.265082 5.200937  
H 1.461560 -1.657078 5.437715

**Int2-S-C2-r1**

C 3.235397 -0.003707 -5.832196  
C 2.362207 -1.259246 -5.743253  
O 2.120633 -1.933398 -6.752857  
N 1.891860 -1.576741 -4.507065  
C 1.099006 -2.783291 -4.289802  
C -0.406088 -2.482742 -4.339254  
O -0.869591 -1.513556 -3.708234  
C 1.476279 -3.455260 -2.942147  
C 0.930072 -4.860882 -2.807295  
C 1.626884 -5.948795 -3.355199  
C -0.290091 -5.107223 -2.163034  
C 1.113026 -7.244332 -3.277293  
C -0.810741 -6.401187 -2.087994  
C -0.113070 -7.473881 -2.648064  
N -1.209590 -3.301012 -5.056301  
C -0.842335 -4.508892 -5.850088  
C -2.202007 -5.143463 -6.168379  
C -3.152101 -3.939036 -6.249535  
C -2.657682 -3.026300 -5.121807  
C 3.510204 3.208984 -2.563197  
C 4.855176 2.455330 -2.596045

|   |           |           |           |   |           |           |           |
|---|-----------|-----------|-----------|---|-----------|-----------|-----------|
| O | 5.905392  | 3.095342  | -2.762841 | H | -0.819529 | -4.283768 | -1.694578 |
| C | 2.211289  | 2.496189  | -3.018231 | H | 1.671285  | -8.073293 | -3.703398 |
| C | 1.634360  | 1.220390  | -2.304325 | H | -1.757398 | -6.571235 | -1.582666 |
| O | 1.251760  | 1.631111  | -0.939491 | H | -0.515401 | -8.480954 | -2.585077 |
| O | 2.343204  | 0.115009  | -2.339107 | H | 1.359625  | -3.460409 | -5.105750 |
| N | 4.823544  | 1.119097  | -2.382745 | H | -2.170371 | -5.736202 | -7.086081 |
| C | 6.037492  | 0.309511  | -2.348601 | H | -2.500437 | -5.804647 | -5.347566 |
| C | 5.835008  | -1.126915 | -2.884979 | H | -3.040521 | -3.435217 | -7.216178 |
| C | 5.573205  | -2.168790 | -1.831677 | H | -4.203958 | -4.210480 | -6.130179 |
| C | 4.442675  | -2.318001 | -1.059663 | H | -2.827409 | -1.963135 | -5.305726 |
| C | 6.492822  | -3.191267 | -1.398580 | H | -3.127656 | -3.275748 | -4.161769 |
| C | 5.845683  | -3.927263 | -0.362444 | H | -0.195255 | -5.172286 | -5.276509 |
| C | 7.794993  | -3.565885 | -1.780668 | H | 2.312349  | 2.207027  | -4.068693 |
| N | 4.600258  | -3.372564 | -0.183485 | H | 1.419567  | 3.253243  | -2.992248 |
| C | 6.460163  | -5.008262 | 0.282797  | H | 3.383978  | 3.564313  | -1.531397 |
| C | 8.409145  | -4.636088 | -1.140631 | H | 6.741349  | -1.412276 | -3.430102 |
| C | 7.747068  | -5.350536 | -0.118259 | H | 5.030832  | -1.115347 | -3.628988 |
| C | -2.683598 | -4.738498 | 5.380600  | H | 3.528162  | -1.740175 | -1.078285 |
| C | -2.124352 | -4.789276 | 4.098225  | H | 8.316888  | -3.024638 | -2.565943 |
| C | -2.524707 | -3.568793 | 6.132357  | H | 9.414686  | -4.930166 | -1.429336 |
| C | -1.415941 | -3.707048 | 3.565734  | H | 5.941405  | -5.555406 | 1.064441  |
| C | -1.822678 | -2.479256 | 5.617113  | H | 8.251701  | -6.183826 | 0.363071  |
| C | -1.261020 | -2.539660 | 4.330109  | H | 6.441032  | 0.260663  | -1.327568 |
| O | -0.578790 | -1.442857 | 3.902914  | H | -2.233387 | -5.688160 | 3.496672  |
| C | 0.802529  | -6.589990 | 7.331943  | H | -2.950935 | -3.499897 | 7.129851  |
| C | 1.442605  | -5.297190 | 7.851775  | H | -0.969924 | -3.763102 | 2.574439  |
| C | 1.634308  | -4.262248 | 6.740354  | H | -1.699007 | -1.569732 | 6.197094  |
| C | -8.344767 | -3.014108 | -2.973612 | H | -0.233514 | -1.512587 | 2.981061  |
| C | -7.534780 | -4.172577 | -2.381307 | H | 0.814111  | -4.868265 | 8.642149  |
| C | -6.137794 | -3.789430 | -1.854399 | H | 2.283972  | -4.656474 | 5.951462  |
| C | 3.545873  | -6.077509 | 2.681952  | H | 0.672342  | -3.999760 | 6.289237  |
| C | 3.510369  | -4.703010 | 2.939232  | H | 1.427385  | -7.060260 | 6.564782  |
| C | 2.591162  | -6.612604 | 1.803390  | H | -7.415367 | -4.949757 | -3.148473 |
| C | 2.556549  | -3.876940 | 2.338050  | H | -5.596966 | -3.298480 | -2.678711 |
| C | 1.632465  | -5.807399 | 1.200799  | H | -8.573025 | -2.249141 | -2.224904 |
| C | 1.571154  | -4.400430 | 1.443799  | H | 2.599341  | -7.679531 | 1.586922  |
| O | 0.656995  | -3.657242 | 0.880525  | H | 4.242350  | -4.261794 | 3.613446  |
| C | -4.963094 | 7.623604  | 1.677203  | H | 0.900267  | -6.233226 | 0.520290  |
| C | -3.498296 | 8.021794  | 1.832894  | H | 2.538390  | -2.811371 | 2.552708  |
| C | -2.516838 | 6.888453  | 1.525876  | H | 0.727231  | -2.226728 | 1.160411  |
| O | -3.035394 | 5.733558  | 1.330337  | H | -3.242509 | 8.873370  | 1.190729  |
| O | -1.287459 | 7.141526  | 1.524570  | H | -3.291832 | 8.356490  | 2.858060  |
| C | -4.670505 | 5.029164  | 4.478932  | H | -5.181191 | 7.324384  | 0.647751  |
| C | -3.248490 | 5.204874  | 5.045086  | H | -5.545059 | 4.529718  | 6.399924  |
| O | -3.064130 | 5.426264  | 6.247071  | H | -6.595314 | 4.165919  | 5.013029  |
| C | -5.562082 | 4.158030  | 5.372273  | H | -5.095272 | 6.038937  | 4.419502  |
| N | -2.238562 | 5.132717  | 4.137302  | H | 0.945816  | 2.717048  | 3.395173  |
| C | -0.855922 | 5.531004  | 4.418992  | H | 0.598502  | 3.189159  | 5.069954  |
| C | 0.159008  | 4.719259  | 3.593837  | H | -0.733845 | 2.782138  | 3.969020  |
| C | 0.246815  | 3.262521  | 4.035958  | H | -0.674556 | 5.398638  | 5.488232  |
| C | -4.458998 | 4.759598  | -1.642598 | H | -5.025925 | 4.464477  | -2.528043 |
| C | -3.143547 | 4.063982  | -1.620863 | H | -5.050858 | 4.512218  | -0.756005 |
| C | -2.569657 | 3.191248  | -2.505023 | H | -2.933692 | 2.799700  | -3.441066 |
| N | -2.243334 | 4.211096  | -0.580688 | H | -0.312061 | 3.351852  | -0.181862 |
| C | -1.174234 | 3.452085  | -0.819674 | H | -0.692525 | 2.101781  | -2.384553 |
| N | -1.346748 | 2.825657  | -1.985072 | H | -5.624757 | 8.460368  | 1.930655  |
| O | 0.354293  | 1.051485  | -3.021151 | H | -9.297540 | -3.369050 | -3.380911 |
| O | 0.720428  | -1.208181 | 1.404319  | H | 4.146662  | -0.257965 | -6.379813 |
| H | 3.493326  | 0.406226  | -4.855968 | H | 6.783156  | 0.837810  | -2.951196 |
| H | 2.702738  | 0.755398  | -6.413820 | H | 3.654434  | 4.098909  | -3.181163 |
| H | 2.568973  | -3.473713 | -2.892249 | H | 4.287785  | -6.713962 | 3.155113  |
| H | 1.126651  | -2.834195 | -2.112620 | H | 0.665071  | -7.313060 | 8.142617  |
| H | 2.583137  | -5.777217 | -3.843645 | H | -0.730831 | 6.596553  | 4.184884  |

|                    |           |           |           |   |           |           |           |
|--------------------|-----------|-----------|-----------|---|-----------|-----------|-----------|
| H                  | -3.232839 | -5.585418 | 5.779944  | C | 0.677604  | -7.313432 | -2.857549 |
| H                  | -2.423056 | 4.819550  | 0.289680  | C | -1.217715 | -6.198358 | -1.862030 |
| H                  | 0.135317  | 0.098758  | -3.059124 | C | -0.589682 | -7.376274 | -2.273124 |
| H                  | -0.178177 | -6.391455 | 6.886228  | N | -1.193998 | -3.394205 | -5.127912 |
| H                  | -2.484541 | 5.053251  | 3.152653  | C | -0.869200 | -4.684000 | -5.798700 |
| H                  | 2.074015  | -0.941996 | -3.706397 | C | -2.250084 | -5.255355 | -6.145121 |
| H                  | 3.898506  | 0.649509  | -2.289572 | C | -3.113029 | -4.004691 | -6.372742 |
| H                  | 3.926114  | -3.650870 | 0.523615  | C | -2.614345 | -3.032272 | -5.298244 |
| C                  | 0.369107  | -0.451921 | 0.244800  | C | 3.642700  | 3.014500  | -2.685800 |
| C                  | 1.418239  | 0.688161  | 0.116582  | C | 4.959923  | 2.217243  | -2.736901 |
| H                  | 1.394499  | 1.278597  | 1.039949  | O | 6.015307  | 2.793576  | -3.037138 |
| H                  | 0.454182  | -1.080005 | -0.649695 | C | 2.332412  | 2.422015  | -3.261141 |
| C                  | -1.072619 | 0.016659  | 0.354795  | C | 1.654562  | 1.143417  | -2.708221 |
| C                  | -1.510570 | 0.694895  | 1.505087  | O | 1.020665  | 1.739866  | -1.104957 |
| C                  | -1.999877 | -0.260194 | -0.660606 | O | 2.315937  | 0.085980  | -2.453543 |
| C                  | -2.827571 | 1.116871  | 1.632296  | N | 4.912323  | 0.912979  | -2.375401 |
| H                  | -0.813936 | 0.881844  | 2.313824  | C | 6.103100  | 0.065300  | -2.386900 |
| C                  | -3.325726 | 0.149778  | -0.550319 | C | 5.766318  | -1.432787 | -2.553486 |
| H                  | -1.684356 | -0.797840 | -1.550043 | C | 5.610817  | -2.196467 | -1.269153 |
| C                  | -3.721684 | 0.842371  | 0.594106  | C | 4.458262  | -2.438649 | -0.556926 |
| H                  | -3.167981 | 1.652214  | 2.509339  | C | 6.678139  | -2.821322 | -0.526720 |
| H                  | -4.046476 | -0.053231 | -1.331834 | C | 6.090816  | -3.429817 | 0.620927  |
| H                  | 2.394189  | 0.200084  | 0.045603  | C | 8.067392  | -2.939401 | -0.719336 |
| H                  | -4.337153 | 5.847605  | -1.660043 | N | 4.740945  | -3.175387 | 0.573990  |
| H                  | -5.214702 | 6.780224  | 2.319544  | C | 6.848698  | -4.144838 | 1.557096  |
| H                  | -4.634450 | 4.640092  | 3.457230  | C | 8.823290  | -3.644318 | 0.210506  |
| H                  | -7.797295 | -2.525953 | -3.788501 | C | 8.218701  | -4.241718 | 1.337924  |
| H                  | -0.314610 | -4.202872 | -6.761423 | C | -2.761000 | -4.589900 | 5.425600  |
| H                  | 1.140404  | 5.195402  | 3.767993  | C | -2.146788 | -4.668700 | 4.169506  |
| H                  | -5.216570 | 3.119140  | 5.382738  | C | -2.691582 | -3.380634 | 6.126839  |
| O                  | -0.152519 | 4.730891  | 2.204671  | C | -1.471129 | -3.575918 | 3.614991  |
| H                  | -0.439656 | 5.637066  | 1.930015  | C | -2.024137 | -2.280483 | 5.588575  |
| H                  | -8.104728 | -4.638841 | -1.564351 | C | -1.407200 | -2.369187 | 4.328946  |
| C                  | -5.348323 | -5.046320 | -1.459643 | O | -0.761582 | -1.257458 | 3.880358  |
| H                  | -4.336231 | -4.791821 | -1.126870 | C | 0.674500  | -6.469600 | 7.438900  |
| H                  | -5.843801 | -5.575778 | -0.636233 | C | 1.163021  | -5.142427 | 8.031692  |
| H                  | -5.261725 | -5.744702 | -2.299738 | C | 1.360427  | -4.070424 | 6.956666  |
| C                  | -6.201124 | -2.802745 | -0.678900 | C | -8.347800 | -2.949500 | -2.995400 |
| H                  | -6.683997 | -1.859389 | -0.950530 | C | -7.709080 | -4.327445 | -2.792587 |
| H                  | -6.759654 | -3.235542 | 0.160869  | C | -6.175727 | -4.316184 | -2.631769 |
| H                  | -5.195828 | -2.561271 | -0.317621 | C | 3.447700  | -6.135700 | 2.790200  |
| H                  | 2.412444  | -5.523381 | 8.312125  | C | 3.271290  | -4.845741 | 3.304299  |
| S                  | 2.394636  | -2.726341 | 7.414321  | C | 2.701336  | -6.500276 | 1.659444  |
| C                  | 2.530001  | -1.726941 | 5.887311  | C | 2.389297  | -3.937117 | 2.708675  |
| H                  | 1.552153  | -1.569708 | 5.426067  | C | 1.816313  | -5.613136 | 1.058140  |
| H                  | 2.950368  | -0.761361 | 6.176762  | C | 1.620521  | -4.284006 | 1.552625  |
| H                  | 3.200625  | -2.205906 | 5.170138  | O | 0.786660  | -3.465747 | 0.975557  |
| N                  | -5.102751 | 1.300924  | 0.705534  | C | -4.746100 | 7.723200  | 1.403300  |
| O                  | -5.428812 | 1.945232  | 1.707921  | C | -3.539653 | 8.542929  | 1.868045  |
| O                  | -5.887201 | 1.032320  | -0.211646 | C | -2.230505 | 8.010465  | 1.263691  |
| <b>TS3-S-C2-r1</b> |           |           |           |   |           |           |           |
| C                  | 3.309000  | -0.272400 | -5.874600 | O | -2.072752 | 6.729271  | 1.375924  |
| C                  | 2.428579  | -1.518981 | -5.759712 | O | -1.433252 | 8.791345  | 0.725910  |
| O                  | 2.158525  | -2.204069 | -6.752225 | C | -4.523500 | 5.194100  | 4.270400  |
| N                  | 1.975692  | -1.819557 | -4.510877 | C | -3.077344 | 5.176562  | 4.795679  |
| C                  | 1.104200  | -2.963700 | -4.273100 | O | -2.824635 | 4.944113  | 5.981331  |
| C                  | -0.373440 | -2.572739 | -4.439337 | C | -5.503000 | 4.497400  | 5.220300  |
| O                  | -0.800194 | -1.521564 | -3.922281 | N | -2.111671 | 5.431838  | 3.867307  |
| C                  | 1.357391  | -3.552305 | -2.860258 | C | -0.698400 | 5.608600  | 4.215800  |
| C                  | 0.680630  | -4.887901 | -2.636228 | C | 0.123821  | 4.316416  | 4.032005  |
| C                  | 1.304927  | -6.078851 | -3.036157 | C | -0.152223 | 3.249217  | 5.089925  |
| C                  | -0.585561 | -4.965995 | -2.040068 | C | -4.293200 | 4.766100  | -1.841400 |
|                    |           |           |           | C | -2.922619 | 4.296286  | -1.456534 |
|                    |           |           |           | C | -2.158939 | 3.249004  | -1.916514 |

|   |           |           |           |                     |           |           |           |
|---|-----------|-----------|-----------|---------------------|-----------|-----------|-----------|
| N | -2.163614 | 4.898139  | -0.467963 | H                   | -0.252523 | 4.463463  | 0.387695  |
| C | -1.008124 | 4.231077  | -0.347738 | H                   | -0.067685 | 2.444957  | -1.210065 |
| N | -0.972139 | 3.222928  | -1.212211 | H                   | -5.675681 | 8.067656  | 1.870783  |
| O | 0.464179  | 1.011973  | -3.393192 | H                   | -9.428973 | -3.036293 | -3.147382 |
| O | 0.662425  | -0.965621 | 1.415044  | H                   | 4.182753  | -0.521419 | -6.481571 |
| H | 3.629122  | 0.114474  | -4.906759 | H                   | 6.736268  | 0.405676  | -3.213381 |
| H | 2.748681  | 0.504834  | -6.403849 | H                   | 3.849861  | 3.946365  | -3.216250 |
| H | 2.440875  | -3.661372 | -2.749414 | H                   | 4.136680  | -6.833331 | 3.256556  |
| H | 1.025349  | -2.836012 | -2.103285 | H                   | 0.531817  | -7.220641 | 8.222749  |
| H | 2.294475  | -6.037294 | -3.485128 | H                   | -0.304894 | 6.373404  | 3.541752  |
| H | -1.068767 | -4.056986 | -1.695015 | H                   | -3.283257 | -5.445482 | 5.842093  |
| H | 1.180473  | -8.224607 | -3.169163 | H                   | -2.343805 | 5.725489  | 0.161454  |
| H | -2.194307 | -6.238939 | -1.387920 | H                   | 0.180512  | 0.073315  | -3.375573 |
| H | -1.078479 | -8.335540 | -2.129246 | H                   | -0.280220 | -6.339020 | 6.918087  |
| H | 1.369541  | -3.710813 | -5.023888 | H                   | -2.368135 | 5.825542  | 2.951341  |
| H | -2.209953 | -5.919839 | -7.011875 | H                   | 2.131957  | -1.157501 | -3.739205 |
| H | -2.634913 | -5.829825 | -5.295604 | H                   | 3.983896  | 0.488641  | -2.238034 |
| H | -2.924068 | -3.591387 | -7.369760 | H                   | 4.052293  | -3.485967 | 1.253970  |
| H | -4.184812 | -4.199976 | -6.286644 | C                   | 0.310983  | -0.318827 | 0.189201  |
| H | -2.699386 | -1.980284 | -5.578957 | C                   | 1.215774  | 0.938777  | 0.044104  |
| H | -3.147224 | -3.165922 | -4.348241 | H                   | 1.075170  | 1.566866  | 0.936620  |
| H | -0.300203 | -5.337111 | -5.136765 | H                   | 0.538020  | -0.976328 | -0.657530 |
| H | 2.487010  | 2.194488  | -4.323133 | C                   | -1.178439 | -0.016107 | 0.161835  |
| H | 1.578333  | 3.213811  | -3.234583 | C                   | -1.793098 | 0.639454  | 1.243329  |
| H | 3.473466  | 3.279892  | -1.633543 | C                   | -1.970519 | -0.417404 | -0.924202 |
| H | 6.577002  | -1.891675 | -3.132040 | C                   | -3.159907 | 0.887939  | 1.246145  |
| H | 4.865461  | -1.531272 | -3.169055 | H                   | -1.194419 | 0.949238  | 2.093089  |
| H | 3.443624  | -2.131654 | -0.767937 | C                   | -3.342235 | -0.181172 | -0.938094 |
| H | 8.545358  | -2.484934 | -1.583458 | H                   | -1.515342 | -0.921695 | -1.771106 |
| H | 9.896617  | -3.739339 | 0.070228  | C                   | -3.921645 | 0.468042  | 0.151510  |
| H | 6.375603  | -4.611531 | 2.415645  | H                   | -3.642681 | 1.388995  | 2.075479  |
| H | 8.834576  | -4.789041 | 2.046190  | H                   | -3.959891 | -0.492934 | -1.770437 |
| H | 6.688399  | 0.211737  | -1.469200 | H                   | 2.247996  | 0.568585  | 0.058091  |
| H | -2.185730 | -5.597785 | 3.606553  | H                   | -4.279183 | 5.802453  | -2.195833 |
| H | -3.161269 | -3.288738 | 7.102689  | H                   | -4.609425 | 6.668001  | 1.644566  |
| H | -0.981497 | -3.651460 | 2.645853  | H                   | -4.550907 | 4.739227  | 3.274047  |
| H | -1.969793 | -1.340960 | 6.130049  | H                   | -7.928756 | -2.447050 | -3.875128 |
| H | -0.383656 | -1.344401 | 2.975413  | H                   | -0.274068 | -4.489271 | -6.699047 |
| H | 0.439894  | -4.782902 | 8.774373  | H                   | 1.184690  | 4.591762  | 4.067476  |
| H | 2.100408  | -4.397167 | 6.218415  | O                   | -0.079780 | 3.785868  | 2.713757  |
| H | 0.420833  | -3.873794 | 6.431037  | H                   | -1.039938 | 3.687614  | 2.616798  |
| H | 1.394749  | -6.869800 | 6.716971  | H                   | -5.266884 | 3.433719  | 5.319379  |
| H | -7.964597 | -4.965431 | -3.649573 | H                   | -8.152500 | -4.812730 | -1.910931 |
| H | -5.756217 | -3.784464 | -3.500274 | C                   | -5.622139 | -5.748760 | -2.648735 |
| H | -8.188886 | -2.293015 | -2.134382 | H                   | -5.908230 | -6.278090 | -3.564771 |
| H | 2.816606  | -7.498117 | 1.239100  | H                   | -4.528394 | -5.753688 | -2.585199 |
| H | 3.834636  | -4.533721 | 4.182395  | H                   | -6.005612 | -6.325918 | -1.797963 |
| H | 1.246463  | -5.912139 | 0.183155  | C                   | -5.723180 | -3.578605 | -1.362602 |
| H | 2.262035  | -2.941861 | 3.128590  | H                   | -6.036237 | -2.530360 | -1.353569 |
| H | 0.772713  | -1.976373 | 1.240474  | H                   | -6.137720 | -4.059739 | -0.467576 |
| H | -3.652297 | 9.600116  | 1.608284  | H                   | -4.631797 | -3.593958 | -1.268966 |
| H | -3.456275 | 8.482574  | 2.962226  | N                   | -5.359422 | 0.714706  | 0.147804  |
| H | -4.876869 | 7.801265  | 0.317392  | O                   | -5.853274 | 1.325021  | 1.101173  |
| H | -5.453147 | 4.941127  | 6.217220  | O                   | -6.024480 | 0.305583  | -0.811765 |
| H | -6.527571 | 4.586046  | 4.847070  | H                   | 2.107439  | -5.301179 | 8.566856  |
| H | -4.813462 | 6.244005  | 4.134025  | C                   | 2.169786  | -1.469961 | 6.216554  |
| H | 0.446051  | 2.356910  | 4.883623  | H                   | 1.237045  | -1.368250 | 5.656970  |
| H | 0.098295  | 3.616603  | 6.090275  | H                   | 2.492555  | -0.483001 | 6.555166  |
| H | -1.209243 | 2.968473  | 5.096612  | H                   | 2.943534  | -1.892433 | 5.570811  |
| H | -0.615407 | 5.960485  | 5.248603  | S                   | 1.943580  | -2.496547 | 7.714217  |
| H | -4.689661 | 4.137662  | -2.641668 |                     |           |           |           |
| H | -4.984752 | 4.714222  | -0.993681 |                     |           |           |           |
| H | -2.375098 | 2.523502  | -2.684551 |                     |           |           |           |
|   |           |           |           | <b>Prod-S-C2-r1</b> |           |           |           |
|   |           |           |           | C                   | -3.093510 | -0.349000 | 5.973608  |



|   |           |           |           |   |           |           |           |
|---|-----------|-----------|-----------|---|-----------|-----------|-----------|
| C | -2.167066 | -1.562358 | 5.866325  | C | 2.424958  | 5.098859  | -5.088334 |
| O | -1.779790 | -2.168163 | 6.868189  | O | 2.161659  | 4.650861  | -6.210033 |
| N | -1.773453 | -1.930083 | 4.605348  | C | 4.881814  | 4.604763  | -5.557264 |
| C | -0.682132 | -2.890886 | 4.426624  | N | 1.470019  | 5.416037  | -4.172642 |
| C | 0.643689  | -2.211491 | 4.832203  | C | 0.041698  | 5.391900  | -4.498912 |
| O | 0.830427  | -1.005760 | 4.561793  | C | -0.877268 | 4.825388  | -3.410208 |
| C | -0.665420 | -3.418529 | 2.970680  | C | -0.478980 | 3.415041  | -2.984109 |
| C | 0.203377  | -4.643692 | 2.775193  | C | 3.867380  | 5.193894  | 1.471557  |
| C | -0.290676 | -5.917742 | 3.093466  | C | 2.537190  | 4.570131  | 1.196165  |
| C | 1.513812  | -4.535957 | 2.292495  | C | 1.949941  | 3.416540  | 1.664303  |
| C | 0.507389  | -7.053839 | 2.946798  | N | 1.602859  | 5.121546  | 0.341013  |
| C | 2.314648  | -5.670126 | 2.142938  | C | 0.525259  | 4.300987  | 0.321181  |
| C | 1.815913  | -6.932192 | 2.472664  | N | 0.693486  | 3.251347  | 1.112391  |
| N | 1.583599  | -2.935705 | 5.469359  | O | -0.676421 | 1.416760  | 4.205304  |
| C | 1.490878  | -4.337629 | 5.964994  | O | -0.217091 | -1.595553 | -1.683716 |
| C | 2.926035  | -4.643449 | 6.408136  | H | -3.726340 | -0.196067 | 5.100516  |
| C | 3.450017  | -3.282495 | 6.891371  | H | -2.475402 | 0.543428  | 6.115401  |
| C | 2.847845  | -2.292730 | 5.886979  | H | -1.701989 | -3.660555 | 2.714200  |
| C | -3.833698 | 2.731691  | 2.650198  | H | -0.343787 | -2.622384 | 2.294045  |
| C | -4.823284 | 1.657248  | 3.119249  | H | -1.310964 | -6.019359 | 3.455302  |
| O | -5.290243 | 1.702793  | 4.262855  | H | 1.903589  | -3.560144 | 2.018646  |
| C | -2.536204 | 2.714934  | 3.481985  | H | 0.105621  | -8.031973 | 3.195567  |
| C | -1.787250 | 1.394344  | 3.459880  | H | 3.324147  | -5.568417 | 1.755063  |
| O | -1.185554 | 1.470690  | 0.030741  | H | 2.437841  | -7.814371 | 2.351823  |
| O | -2.170254 | 0.393857  | 2.869286  | H | -0.883126 | -3.721612 | 5.106188  |
| N | -5.156672 | 0.691039  | 2.218737  | H | 2.957995  | -5.419638 | 7.176806  |
| C | -6.002499 | -0.451094 | 2.565902  | H | 3.510720  | -4.990906 | 5.549625  |
| C | -5.288003 | -1.817888 | 2.569293  | H | 3.074485  | -3.070503 | 7.898543  |
| C | -5.139438 | -2.455368 | 1.218674  | H | 4.540944  | -3.226677 | 6.919770  |
| C | -3.982368 | -2.647765 | 0.500114  | H | 2.639620  | -1.307416 | 6.309282  |
| C | -6.200646 | -3.033478 | 0.428115  | H | 3.495685  | -2.150223 | 5.013765  |
| C | -5.603086 | -3.557335 | -0.755164 | H | 1.138905  | -5.009352 | 5.183833  |
| C | -7.589046 | -3.180252 | 0.607494  | H | -2.757483 | 2.940377  | 4.531053  |
| N | -4.254349 | -3.297111 | -0.685091 | H | -1.848422 | 3.493035  | 3.134503  |
| C | -6.351119 | -4.211516 | -1.742077 | H | -3.586963 | 2.613645  | 1.590901  |
| C | -8.334678 | -3.827211 | -0.371637 | H | -5.883101 | -2.482431 | 3.210902  |
| C | -7.720702 | -4.337386 | -1.535564 | H | -4.311990 | -1.715860 | 3.052970  |
| C | 3.053787  | -4.608230 | -5.307039 | H | -2.966609 | -2.374893 | 0.748417  |
| C | 2.465653  | -4.607189 | -4.041114 | H | -8.074462 | -2.798146 | 1.501717  |
| C | 2.913684  | -3.482520 | -6.124760 | H | -9.406818 | -3.945029 | -0.240935 |
| C | 1.742114  | -3.505266 | -3.585915 | H | -5.873175 | -4.612810 | -2.630374 |
| C | 2.191702  | -2.373967 | -5.686624 | H | -8.328251 | -4.840303 | -2.282677 |
| C | 1.596156  | -2.378804 | -4.414355 | H | -6.855954 | -0.486447 | 1.878810  |
| O | 0.898625  | -1.276087 | -4.041553 | H | 2.567124  | -5.474570 | -3.393975 |
| C | -0.236460 | -6.904593 | -7.120618 | H | 3.369013  | -3.466111 | -7.111576 |
| C | -0.890124 | -5.686735 | -7.785000 | H | 1.285121  | -3.524494 | -2.602014 |
| C | -1.077687 | -4.529634 | -6.800431 | H | 2.076000  | -1.494653 | -6.313092 |
| C | 8.684642  | -2.031586 | 2.845988  | H | 0.476479  | -1.399707 | -3.140365 |
| C | 8.190753  | -3.329762 | 3.495524  | H | -0.273964 | -5.351287 | -8.628474 |
| C | 6.885452  | -3.895544 | 2.902972  | H | -1.701457 | -4.843618 | -5.956867 |
| C | -2.899591 | -6.612845 | -2.405047 | H | -0.112440 | -4.199294 | -6.404292 |
| C | -2.680946 | -5.383332 | -3.032018 | H | -0.850863 | -7.281708 | -6.295815 |
| C | -2.190898 | -6.900511 | -1.231432 | H | 8.031876  | -3.154765 | 4.568348  |
| C | -1.786803 | -4.449806 | -2.500461 | H | 6.110633  | -3.124897 | 3.027499  |
| C | -1.294027 | -5.987207 | -0.691364 | H | 9.017410  | -2.194721 | 1.815825  |
| C | -1.059781 | -4.720640 | -1.301711 | H | -2.345102 | -7.854270 | -0.729958 |
| O | -0.215315 | -3.871563 | -0.773700 | H | -3.218536 | -5.140353 | -3.946992 |
| C | 3.940408  | 8.019613  | -1.917782 | H | -0.749310 | -6.217073 | 0.219347  |
| C | 2.687544  | 8.783285  | -2.347588 | H | -1.623460 | -3.499744 | -3.002041 |
| C | 1.376347  | 8.188902  | -1.807617 | H | -0.222152 | -2.609990 | -1.316148 |
| O | 1.346680  | 6.890015  | -1.753763 | H | 2.738746  | 9.835449  | -2.050033 |
| O | 0.443698  | 8.941385  | -1.502101 | H | 2.610759  | 8.772447  | -3.444651 |
| C | 3.885984  | 5.344301  | -4.657508 | H | 4.074571  | 8.064317  | -0.830741 |

H 4.732864 4.881678 -6.603102  
H 5.910387 4.846585 -5.272283  
H 4.067213 6.426026 -4.699308  
H -1.161622 3.058182 -2.210583  
H -0.516739 2.722592 -3.832882  
H 0.537107 3.399627 -2.578481  
H -0.058636 4.792484 -5.406659  
H 4.438962 4.564149 2.157779  
H 4.457913 5.315675 0.555917  
H 2.361799 2.699309 2.360357  
H -0.336485 4.508251 -0.297548  
H -0.424015 1.933555 0.454052  
H 4.841862 8.440103 -2.377811  
H 9.532925 -1.615695 3.400748  
H -3.714885 -0.471609 6.862126  
H -6.388316 -0.230750 3.563095  
H -4.317829 3.703153 2.782353  
H -3.600166 -7.330587 -2.821534  
H -0.102429 -7.719221 -7.839808  
H -0.301187 6.409192 -4.737210  
H 3.618851 -5.469584 -5.651215  
H 1.689906 5.931721 -0.291943  
H -0.250274 0.522144 4.223095  
H 0.747190 -6.649227 -6.711940  
H 1.725825 5.906439 -3.310255  
H -1.932142 -1.263295 3.851135  
H -4.611941 0.634770 1.369363  
H -3.550387 -3.629269 -1.338248  
C -0.182780 -0.720545 -0.575331  
C -0.757704 0.639671 -1.025259  
H -0.024994 1.133636 -1.677618  
H -0.849774 -1.096180 0.214130  
C 1.215647 -0.594886 0.011364  
C 1.396868 -0.450446 1.393401  
C 2.348463 -0.618557 -0.820085  
C 2.668796 -0.366938 1.951130  
H 0.535975 -0.424637 2.050220  
C 3.627343 -0.518778 -0.287115  
H 2.220816 -0.726245 -1.890843  
C 3.772582 -0.408346 1.099007  
H 2.795514 -0.289605 3.022558  
H 4.505661 -0.543044 -0.919403  
H -1.635995 0.405185 -1.637198  
H 3.767618 6.185337 1.929323  
H 3.871345 6.967602 -2.196070  
H 4.009935 5.052076 -3.608867  
H 7.892085 -1.276776 2.818070  
H 0.792695 -4.378539 6.810237  
H -1.871612 4.768372 -3.878024  
H 4.752032 3.521263 -5.480458  
H 8.975032 -4.098520 3.427708  
C 6.439157 -5.143299 3.678816  
H 6.328153 -4.930532 4.748399  
H 5.478474 -5.520144 3.310551  
H 7.173546 -5.952468 3.576463  
C 7.003785 -4.202227 1.402559  
H 7.204123 -3.300035 0.817466  
H 7.814479 -4.917177 1.211108  
H 6.076979 -4.643029 1.018784  
N 5.112973 -0.360509 1.670301  
O 5.227948 -0.387448 2.902225  
O 6.077340 -0.300617 0.900890  
O -1.037445 5.694531 -2.292506

H -0.185008 6.147992 -2.074757  
H -1.863529 -5.971898 -8.203025  
S -1.889726 -3.096861 -7.623970  
C -2.082001 -1.964501 -6.199871  
H -1.117499 -1.717809 -5.750054  
H -2.541866 -1.050502 -6.581983  
H -2.739901 -2.401495 -5.444355

**React-S-C2-r3**

C 2.045548 1.185965 -6.530118  
C 1.203596 -0.089300 -6.509014  
O 0.970583 -0.727348 -7.541712  
N 0.719272 -0.458190 -5.290099  
C -0.173657 -1.604399 -5.130578  
C -1.640461 -1.120944 -5.111641  
O -1.960980 -0.153494 -4.403128  
C 0.158805 -2.317225 -3.793838  
C -0.654956 -3.567450 -3.541116  
C -0.208461 -4.816397 -3.999581  
C -1.877926 -3.507722 -2.856223  
C -0.962697 -5.972015 -3.785761  
C -2.635827 -4.660893 -2.641611  
C -2.181316 -5.897164 -3.106583  
N -2.564437 -1.775232 -5.847329  
C -2.381370 -2.973925 -6.689756  
C -3.820066 -3.430446 -6.970946  
C -4.617147 -2.116512 -6.970024  
C -3.964612 -1.312319 -5.839870  
C 2.872471 3.930869 -2.943939  
C 4.141744 3.085955 -3.134042  
O 5.241186 3.638295 -3.263414  
C 1.506423 3.271594 -3.223696  
C 1.181644 2.094246 -2.279166  
O 0.896895 2.374580 -1.085174  
O 1.289388 0.911597 -2.749686  
N 4.011006 1.732447 -3.117469  
C 5.156914 0.852425 -3.321694  
C 4.736925 -0.568134 -3.760247  
C 4.633520 -1.564936 -2.640498  
C 3.599958 -1.726810 -1.747204  
C 5.650557 -2.514670 -2.261186  
C 5.160055 -3.226317 -1.128796  
C 6.922933 -2.842009 -2.765918  
N 3.913680 -2.721082 -0.840245  
C 5.896557 -4.242506 -0.507259  
C 7.658970 -3.847219 -2.149506  
C 7.149994 -4.541266 -1.030628  
C -3.250292 -4.487000 4.558477  
C -2.618815 -4.128009 3.366486  
C -3.126739 -3.656084 5.676243  
C -1.865341 -2.956886 3.283814  
C -2.376325 -2.483826 5.609634  
C -1.737865 -2.132452 4.411429  
O -1.005410 -0.985142 4.397666  
C 0.224996 -6.817978 5.928659  
C 0.721880 -5.799944 6.961081  
C 1.057805 -4.452597 6.318161  
C -9.453032 -1.314963 -2.943645  
C -8.685136 -2.463452 -2.279990  
C -7.312330 -2.076077 -1.695493  
C 2.586426 -5.921954 1.129222  
C 2.679049 -4.801925 1.957011  
C 1.672415 -5.915155 0.070064

|   |           |           |           |   |            |           |           |
|---|-----------|-----------|-----------|---|------------|-----------|-----------|
| C | 1.882426  | -3.675834 | 1.725107  | H | -6.727849  | -1.609603 | -2.503420 |
| C | 0.871511  | -4.802863 | -0.173649 | H | -9.709866  | -0.527140 | -2.228675 |
| C | 0.981624  | -3.671010 | 0.647908  | H | 1.587896   | -6.781365 | -0.579917 |
| O | 0.200105  | -2.597562 | 0.350917  | H | 3.377504   | -4.793975 | 2.789021  |
| C | -4.799431 | 8.376560  | 2.592349  | H | 0.170519   | -4.782451 | -1.000635 |
| C | -3.642973 | 8.689287  | 1.641430  | H | 1.960334   | -2.804256 | 2.367810  |
| C | -2.539354 | 7.622227  | 1.677380  | H | 0.437542   | -1.836546 | 0.919908  |
| O | -2.919156 | 6.399885  | 1.708247  | H | -4.019920  | 8.746572  | 0.610861  |
| O | -1.348322 | 8.015605  | 1.680643  | H | -3.192276  | 9.660120  | 1.868430  |
| C | -4.482462 | 5.434408  | 5.023440  | H | -5.251268  | 7.414907  | 2.340270  |
| C | -2.992328 | 5.449954  | 5.399438  | H | -4.880460  | 3.664852  | 6.224774  |
| O | -2.646719 | 5.222193  | 6.567470  | H | -6.136704  | 4.004544  | 5.016269  |
| C | -5.058752 | 4.016480  | 5.204998  | H | -4.993345  | 6.134509  | 5.692959  |
| N | -2.103093 | 5.680118  | 4.400166  | H | 0.433490   | 3.876837  | 1.850598  |
| C | -0.658861 | 5.662300  | 4.655067  | H | -0.503388  | 3.282016  | 3.243099  |
| C | 0.243185  | 5.316154  | 3.452405  | H | -1.226848  | 4.441105  | 2.113749  |
| C | -0.298508 | 4.155148  | 2.614061  | H | -0.495357  | 4.930065  | 5.452042  |
| C | -4.828286 | 5.926022  | -1.078021 | H | -5.631842  | 5.815578  | -1.811294 |
| C | -3.627016 | 5.164898  | -1.518350 | H | -5.197069  | 5.574513  | -0.109032 |
| C | -3.325556 | 4.493884  | -2.679186 | H | -3.943335  | 4.376306  | -3.559487 |
| N | -2.514581 | 5.015629  | -0.716661 | H | -0.645015  | 3.972097  | -1.006848 |
| C | -1.605424 | 4.275414  | -1.404258 | H | -1.419921  | 3.065248  | -4.206888 |
| N | -2.063732 | 3.940254  | -2.602328 | H | -5.576384  | 9.147688  | 2.540499  |
| O | -1.254481 | 2.605331  | -5.058115 | H | -10.388402 | -1.672709 | -3.387111 |
| O | 0.430217  | -0.457766 | 2.103208  | H | 2.668743   | 1.180319  | -7.425061 |
| H | 2.666724  | 1.293255  | -5.638736 | H | 5.788911   | 1.314759  | -4.087879 |
| H | 1.367758  | 2.045556  | -6.571204 | H | 3.005320   | 4.812733  | -3.577439 |
| H | 1.225415  | -2.561760 | -3.814887 | H | 3.210669   | -6.791064 | 1.310778  |
| H | 0.009509  | -1.592340 | -2.987335 | H | -0.002558  | -7.777985 | 6.403197  |
| H | 0.743088  | -4.882357 | -4.521533 | H | -0.326265  | 6.633805  | 5.046069  |
| H | -2.233681 | -2.549279 | -2.488311 | H | -3.837984  | -5.398143 | 4.615353  |
| H | -0.596419 | -6.929744 | -4.144888 | H | -2.434408  | 5.432652  | 0.222630  |
| H | -3.578295 | -4.593174 | -2.105696 | H | -1.381152  | 1.669779  | -4.828290 |
| H | -2.768104 | -6.795105 | -2.935653 | H | -0.685091  | -6.462953 | 5.433433  |
| H | 0.008631  | -2.268111 | -5.976541 | H | -2.439689  | 5.887555  | 3.454789  |
| H | -3.898461 | -3.987785 | -7.907780 | H | 0.871162   | 0.144076  | -4.471496 |
| H | -4.164636 | -4.080281 | -6.158997 | H | 3.083309   | 1.307948  | -3.046202 |
| H | -4.486951 | -1.595722 | -7.925207 | H | 3.318106   | -3.030463 | -0.085072 |
| H | -5.688274 | -2.262172 | -6.809261 | C | 0.136482   | 0.879820  | 1.588480  |
| H | -4.001188 | -0.230494 | -5.985989 | C | 1.246559   | 0.695111  | 2.529309  |
| H | -4.422365 | -1.529610 | -4.866328 | H | 1.059260   | 0.931182  | 3.575600  |
| H | -1.798378 | -3.736662 | -6.170279 | H | 0.335175   | 1.028082  | 0.527440  |
| H | 1.444666  | 2.937060  | -4.259772 | C | 5.388482   | 0.649934  | 1.525496  |
| H | 0.735196  | 4.034232  | -3.087352 | C | 4.973140   | 0.119537  | 2.747393  |
| H | 2.891999  | 4.290605  | -1.907005 | C | 4.492538   | 1.203932  | 0.614010  |
| H | 5.479048  | -0.931531 | -4.479052 | C | 3.617816   | 0.148109  | 3.051684  |
| H | 3.792097  | -0.509116 | -4.312546 | H | 5.701446   | -0.295069 | 3.431893  |
| H | 2.662137  | -1.190061 | -1.684879 | C | 3.134665   | 1.219349  | 0.927636  |
| H | 7.327960  | -2.314719 | -3.625629 | H | 4.852480   | 1.622286  | -0.316571 |
| H | 8.642777  | -4.104706 | -2.531924 | C | 2.689042   | 0.684836  | 2.144470  |
| H | 5.497658  | -4.778334 | 0.348754  | H | 3.275989   | -0.247202 | 4.003389  |
| H | 7.747699  | -5.323054 | -0.570354 | H | 2.428303   | 1.660760  | 0.227967  |
| H | 5.770884  | 0.793648  | -2.413839 | H | -0.795786  | 1.291192  | 1.964627  |
| H | -2.709809 | -4.761502 | 2.488641  | H | -4.619118  | 6.996681  | -0.970416 |
| H | -3.617431 | -3.921687 | 6.608527  | H | -4.453301  | 8.322881  | 3.629812  |
| H | -1.380785 | -2.684979 | 2.351036  | H | -4.629330  | 5.777022  | 3.995843  |
| H | -2.271821 | -1.831457 | 6.470846  | H | -8.861026  | -0.855611 | -3.743791 |
| H | -0.563296 | -0.880630 | 3.526623  | H | -1.856630  | -2.707638 | -7.616113 |
| H | -0.045807 | -5.653038 | 7.730768  | H | 1.189834   | 4.990551  | 3.907398  |
| H | 1.862885  | -4.567465 | 5.583723  | H | -4.586056  | 3.311767  | 4.513355  |
| H | 0.181910  | -4.045422 | 5.803181  | H | -9.299450  | -2.902147 | -1.480078 |
| H | 0.978104  | -6.997791 | 5.153441  | C | -6.552380  | -3.326946 | -1.230400 |
| H | -8.535181 | -3.262268 | -3.018807 | H | -5.559195  | -3.068065 | -0.847451 |

H -7.094350 -3.837763 -0.424503  
H -6.422915 -4.043195 -2.049713  
C -7.426553 -1.059370 -0.549908  
H -7.899589 -0.126556 -0.871181  
H -8.021935 -1.469849 0.275573  
H -6.438269 -0.805857 -0.151932  
S 1.595269 -3.237991 7.591688  
H 1.608622 -6.192157 7.473978  
C 1.925067 -1.788309 6.526638  
H 1.030557 -1.497551 5.970045  
H 2.221735 -0.968632 7.184449  
H 2.743142 -2.000073 5.832588  
N 6.819120 0.630847 1.198307  
O 7.597472 0.156492 2.029549  
O 7.174439 1.090374 0.111626  
O 0.596724 6.433408 2.660252  
H -0.201409 6.864249 2.261096

**TS1-S-C1-r3**

C 2.615254 0.006014 -6.059938  
C 1.687337 -1.200182 -5.953867  
O 1.462089 -1.921358 -6.930906  
N 1.115568 -1.421361 -4.731888  
C 0.172822 -2.518441 -4.532162  
C -1.270629 -1.984653 -4.472557  
O -1.538395 -1.006537 -3.755199  
C 0.513364 -3.303028 -3.240412  
C -0.294686 -4.570706 -3.058430  
C 0.160941 -5.785912 -3.591325  
C -1.518166 -4.558883 -2.373819  
C -0.586622 -6.956954 -3.452334  
C -2.269896 -5.727318 -2.234594  
C -1.807997 -6.930166 -2.774813  
N -2.230930 -2.607745 -5.190641  
C -2.111012 -3.813492 -6.044276  
C -3.571721 -4.213575 -6.293166  
C -4.319062 -2.871246 -6.270679  
C -3.614375 -2.096989 -5.151208  
C 3.600136 2.899289 -2.633196  
C 4.784820 1.937677 -2.811409  
O 5.920767 2.397385 -2.978564  
C 2.156540 2.372684 -2.757570  
C 1.770713 1.283216 -1.737822  
O 1.509012 1.671461 -0.555355  
O 1.782204 0.077567 -2.130169  
N 4.550731 0.600758 -2.739998  
C 5.650092 -0.358776 -2.782501  
C 5.183608 -1.793867 -3.147607  
C 5.141931 -2.768880 -2.002115  
C 4.029899 -3.323230 -1.413281  
C 6.279417 -3.337503 -1.315868  
C 5.773137 -4.220723 -0.318119  
C 7.673428 -3.196674 -1.450424  
N 4.399115 -4.196545 -0.408718  
C 6.614150 -4.939727 0.539864  
C 8.511044 -3.912447 -0.603205  
C 7.985840 -4.772478 0.384893  
C -3.238198 -4.556498 5.258397  
C -2.653486 -4.610738 3.989928  
C -3.437592 -3.305192 5.853411  
C -2.266809 -3.446938 3.322469  
C -3.052742 -2.134589 5.200778  
C -2.455756 -2.193167 3.928493

O -2.105145 -1.022938 3.344462  
C 0.032898 -7.050703 6.829303  
C 0.647324 -5.837242 7.536150  
C 0.585674 -4.576732 6.669887  
C -9.085322 -1.402445 -2.531204  
C -8.486839 -2.807783 -2.653909  
C -7.077846 -2.970186 -2.050631  
C 2.517406 -6.632997 2.026699  
C 2.578958 -5.330197 2.529949  
C 1.556579 -6.948940 1.061047  
C 1.692770 -4.348986 2.078038  
C 0.664201 -5.982941 0.604395  
C 0.724885 -4.674227 1.112592  
O -0.167486 -3.774312 0.644043  
C -3.785398 8.239696 2.485393  
C -2.558769 8.420975 1.589590  
C -1.558301 7.264618 1.719336  
O -2.052212 6.085087 1.790513  
O -0.336507 7.544283 1.757030  
C -3.723193 5.438781 5.096387  
C -2.246316 5.350379 5.512340  
O -1.944514 5.141046 6.695515  
C -4.418201 4.077413 5.294610  
N -1.326124 5.479610 4.523117  
C 0.110998 5.357301 4.782302  
C 0.948718 4.751463 3.634635  
C 0.259531 3.570167 2.942693  
C -3.951480 5.575159 -1.028914  
C -2.811847 4.673019 -1.347076  
C -2.534505 3.866614 -2.425095  
N -1.743691 4.511517 -0.490898  
C -0.882379 3.634714 -1.066604  
N -1.328678 3.219705 -2.244496  
O -0.600447 1.654321 -4.569462  
O -0.240030 -1.292849 1.416669  
H 3.216393 0.153956 -5.159734  
H 2.004734 0.904064 -6.203908  
H 1.577201 -3.551209 -3.297544  
H 0.371067 -2.634949 -2.386156  
H 1.113060 -5.813481 -4.115860  
H -1.874788 -3.631406 -1.936672  
H -0.213649 -7.888521 -3.868616  
H -3.211445 -5.700318 -1.693475  
H -2.391228 -7.839586 -2.662329  
H 0.299466 -3.172160 -5.396070  
H -3.691659 -4.764554 -7.229357  
H -3.921773 -4.852682 -5.475157  
H -4.190021 -2.351068 -7.226367  
H -5.391173 -2.978007 -6.087493  
H -3.616276 -1.013748 -5.291198  
H -4.058573 -2.304356 -4.169359  
H -1.544744 -4.597770 -5.540281  
H 1.964465 1.982384 -3.758259  
H 1.485090 3.222704 -2.613412  
H 3.734981 3.350415 -1.641597  
H 5.865145 -2.182618 -3.914303  
H 4.198287 -1.745577 -3.623363  
H 2.985872 -3.159955 -1.633803  
H 8.090646 -2.535564 -2.205156  
H 9.588067 -3.807550 -0.697638  
H 6.207021 -5.602823 1.297315  
H 8.665498 -5.313981 1.036512  
H 6.179149 -0.371854 -1.820562

H -2.494557 -5.570811 3.505707  
H -3.895672 -3.237467 6.836748  
H -1.821040 -3.509135 2.335557  
H -3.202822 -1.161941 5.659531  
H -1.525268 -1.153742 2.548666  
H 0.118569 -5.654044 8.479685  
H 1.144609 -4.720868 5.738640  
H -0.451506 -4.343092 6.409072  
H 0.562579 -7.276939 5.897328  
H -8.442016 -3.081721 -3.716594  
H -6.428165 -2.216247 -2.521171  
H -9.248464 -1.115532 -1.487765  
H 1.501479 -7.957476 0.660264  
H 3.321682 -5.070100 3.279247  
H -0.085834 -6.216341 -0.144134  
H 1.741145 -3.335139 2.463753  
H -0.061852 -2.874769 1.074824  
H -2.875037 8.472631 0.538374  
H -2.038024 9.357886 1.809797  
H -4.303936 7.310722 2.239717  
H -4.300945 3.739429 6.327857  
H -5.487326 4.148208 5.071706  
H -4.194169 6.194997 5.733526  
H 0.941318 3.141342 2.202807  
H -0.021884 2.792402 3.662698  
H -0.645305 3.898605 2.425655  
H 0.208377 4.734840 5.676694  
H -4.730662 5.479862 -1.789972  
H -4.393418 5.339467 -0.055343  
H -3.131377 3.714507 -3.314416  
H 0.038751 3.306081 -0.605042  
H -0.737247 2.186283 -3.755351  
H -4.490237 9.070642 2.367076  
H -10.052344 -1.342432 -3.041874  
H 3.262397 -0.127755 -6.927037  
H 6.367841 0.009241 -3.520888  
H 3.760421 3.705501 -3.355202  
H 3.209308 -7.390381 2.382155  
H 0.079482 -7.940497 7.465496  
H 0.544986 6.337308 5.023415  
H -3.541772 -5.465909 5.767841  
H -1.656283 5.004998 0.412433  
H -0.836024 0.755618 -4.285139  
H -1.017899 -6.870423 6.578407  
H -1.638897 5.654039 3.563463  
H 1.276471 -0.772834 -3.957968  
H 3.606568 0.256725 -2.562181  
H 3.759200 -4.660706 0.220924  
C 0.017223 -0.763778 0.121018  
C 0.793380 0.182672 0.910111  
H 0.228950 0.987526 1.361449  
H 0.579155 -1.430469 -0.531065  
C 4.603942 -0.575822 2.632644  
C 3.639311 0.105060 3.375277  
C 4.365935 -1.006481 1.326388  
C 2.403144 0.350104 2.789097  
H 3.862483 0.429352 4.383200  
C 3.123585 -0.756309 0.756150  
H 5.143310 -1.517298 0.773276  
C 2.127492 -0.086296 1.481907  
H 1.638708 0.873183 3.352914  
H 2.927674 -1.038248 -0.270358  
H -0.847013 -0.345053 -0.403361

H -3.644362 6.626943 -0.994397  
H -3.499017 8.195751 3.541181  
H -3.814954 5.763797 4.057111  
H -8.425421 -0.651968 -2.981739  
H -1.598565 -3.560159 -6.980809  
H 1.858750 4.372358 4.121381  
H -3.984492 3.318181 4.636019  
O 1.415003 5.711917 2.704471  
H 0.669908 6.249295 2.334735  
H -9.160782 -3.537126 -2.181099  
C -6.505966 -4.355561 -2.385184  
H -5.485222 -4.466650 -2.003577  
H -7.115984 -5.149874 -1.936791  
H -6.479895 -4.527569 -3.467285  
C -7.055274 -2.729152 -0.533878  
H -7.386522 -1.719761 -0.272395  
H -7.711449 -3.441537 -0.017652  
H -6.044603 -2.857861 -0.132326  
H 1.690628 -6.050946 7.799300  
C 1.023451 -1.815306 6.338933  
H 1.365083 -0.882047 6.791316  
H 1.597914 -1.998754 5.427686  
H -0.037598 -1.726465 6.094136  
S 1.297773 -3.138313 7.570685  
N 5.908867 -0.841001 3.243160  
O 6.106861 -0.436476 4.392324  
O 6.746747 -1.458495 2.581738

**Int1-S-C1-r3**

C 2.550213 -0.189784 -6.092219  
C 1.662308 -1.420036 -5.937119  
O 1.534504 -2.234142 -6.855444  
N 1.017277 -1.554217 -4.738566  
C 0.124899 -2.678189 -4.481237  
C -1.330844 -2.195368 -4.365275  
O -1.610008 -1.239471 -3.620836  
C 0.533957 -3.474425 -3.213261  
C -0.179016 -4.807045 -3.111315  
C 0.304618 -5.925257 -3.807627  
C -1.350678 -4.945355 -2.354768  
C -0.370469 -7.146337 -3.761565  
C -2.032238 -6.163939 -2.312001  
C -1.547029 -7.267175 -3.017729  
N -2.291598 -2.837486 -5.063941  
C -2.161277 -4.024517 -5.944842  
C -3.615482 -4.471621 -6.146346  
C -4.407650 -3.157204 -6.074235  
C -3.690366 -2.376474 -4.967367  
C 3.539790 2.804602 -2.754802  
C 4.703800 1.826372 -2.955389  
O 5.813043 2.276228 -3.255223  
C 2.062565 2.328649 -2.665293  
C 1.727028 1.159963 -1.747476  
O 1.427266 1.517795 -0.495365  
O 1.744664 -0.003646 -2.137175  
N 4.503192 0.503926 -2.718695  
C 5.601406 -0.449009 -2.819902  
C 5.132743 -1.916499 -2.858396  
C 4.947046 -2.570903 -1.519282  
C 3.767492 -2.963723 -0.931352  
C 5.995592 -2.952797 -0.603855  
C 5.367090 -3.570259 0.517055  
C 7.399391 -2.848135 -0.620011

|   |           |           |           |   |            |           |           |
|---|-----------|-----------|-----------|---|------------|-----------|-----------|
| N | 4.011617  | -3.565407 | 0.283559  | H | 1.461767   | 3.185822  | -2.355632 |
| C | 6.098945  | -4.067869 | 1.602550  | H | 3.794935   | 3.356320  | -1.841674 |
| C | 8.128124  | -3.340141 | 0.456957  | H | 5.891609   | -2.474101 | -3.422288 |
| C | 7.483152  | -3.941672 | 1.558790  | H | 4.210882   | -1.989171 | -3.447323 |
| C | -3.234300 | -4.446199 | 5.379599  | H | 2.755325   | -2.862578 | -1.293502 |
| C | -2.637401 | -4.557202 | 4.118898  | H | 7.910192   | -2.389658 | -1.462765 |
| C | -3.311714 | -3.181120 | 5.973321  | H | 9.211625   | -3.260518 | 0.454190  |
| C | -2.124830 | -3.439936 | 3.452899  | H | 5.599280   | -4.537592 | 2.444177  |
| C | -2.804254 | -2.055679 | 5.323965  | H | 8.078639   | -4.314365 | 2.387291  |
| C | -2.204684 | -2.173654 | 4.057240  | H | 6.298964   | -0.299618 | -1.987056 |
| O | -1.739689 | -1.035495 | 3.482169  | H | -2.566100  | -5.529342 | 3.637724  |
| C | 0.053402  | -6.882200 | 7.006397  | H | -3.773469  | -3.065413 | 6.950579  |
| C | 1.077135  | -5.761805 | 6.789397  | H | -1.660972  | -3.549816 | 2.475081  |
| C | 0.542177  | -4.404987 | 7.252974  | H | -2.867116  | -1.071400 | 5.778502  |
| C | -9.128733 | -1.538890 | -2.470184 | H | -1.297617  | -1.190937 | 2.610189  |
| C | -8.525076 | -2.944484 | -2.564158 | H | 2.002263   | -5.996518 | 7.330661  |
| C | -7.116799 | -3.091402 | -1.954484 | H | -0.348972  | -4.129791 | 6.679681  |
| C | 2.514497  | -6.593699 | 2.182203  | H | 0.265818   | -4.443614 | 8.313012  |
| C | 2.372744  | -5.345444 | 2.799270  | H | -0.873323  | -6.677793 | 6.459551  |
| C | 1.744016  | -6.860424 | 1.042960  | H | -8.477241  | -3.238741 | -3.621312 |
| C | 1.494474  | -4.380980 | 2.294156  | H | -9.292938  | -1.231526 | -1.432736 |
| C | 0.861657  | -5.915650 | 0.531177  | H | 1.836144   | -7.823975 | 0.544637  |
| C | 0.698461  | -4.631973 | 1.135407  | H | 2.957446   | -5.110347 | 3.686854  |
| O | -0.143477 | -3.760969 | 0.642539  | H | 0.268482   | -6.135946 | -0.350953 |
| C | -3.842593 | 8.262899  | 2.242520  | H | 1.395349   | -3.419054 | 2.790006  |
| C | -2.634232 | 8.636133  | 1.374559  | H | -0.147912  | -2.388716 | 1.057389  |
| C | -1.371719 | 7.800924  | 1.656129  | H | -2.893485  | 8.495486  | 0.315638  |
| O | -1.556910 | 6.515570  | 1.742438  | H | -2.373357  | 9.691393  | 1.500329  |
| O | -0.281124 | 8.371990  | 1.778089  | H | -4.127044  | 7.221363  | 2.074629  |
| C | -3.757865 | 5.538451  | 4.932508  | H | -4.370447  | 4.025548  | 6.361963  |
| C | -2.288651 | 5.421530  | 5.374090  | H | -5.562487  | 4.311227  | 5.074404  |
| O | -2.006128 | 5.098461  | 6.535158  | H | -4.204763  | 6.382579  | 5.470757  |
| C | -4.493512 | 4.236132  | 5.297269  | H | 0.507158   | 2.431804  | 2.934996  |
| N | -1.362344 | 5.657514  | 4.415153  | H | -0.053978  | 2.693714  | 4.595121  |
| C | 0.075058  | 5.462001  | 4.603179  | H | -1.052961  | 3.224238  | 3.228106  |
| C | 0.684185  | 4.482622  | 3.585430  | H | 0.216695   | 5.088421  | 5.619873  |
| C | -0.024842 | 3.126341  | 3.588834  | H | -4.713161  | 5.234778  | -1.991290 |
| C | -4.014487 | 5.497801  | -1.192889 | H | -4.547727  | 5.410278  | -0.238969 |
| C | -2.820107 | 4.609685  | -1.244076 | H | -2.996652  | 3.211672  | -2.950957 |
| C | -2.456862 | 3.592412  | -2.094595 | H | 0.039804   | 3.628119  | -0.087824 |
| N | -1.791040 | 4.701976  | -0.332615 | H | -0.757960  | 1.912342  | -3.199057 |
| C | -0.868584 | 3.761739  | -0.656472 | H | -4.706029  | 8.895852  | 2.010206  |
| N | -1.236905 | 3.063958  | -1.723054 | H | -10.095803 | -1.492639 | -2.982204 |
| O | -0.661872 | 1.435768  | -4.050089 | H | 3.269305   | -0.380120 | -6.889059 |
| O | -0.235172 | -1.354553 | 1.242652  | H | 6.160701   | -0.215603 | -3.732614 |
| H | 3.076183  | 0.062608  | -5.168656 | H | 3.604679   | 3.529815  | -3.569580 |
| H | 1.932002  | 0.669760  | -6.373297 | H | 3.202973   | -7.334420 | 2.577748  |
| H | 1.614878  | -3.635580 | -3.274910 | H | 0.444467   | -7.843014 | 6.656768  |
| H | 0.333762  | -2.870799 | -2.322987 | H | 0.595183   | 6.424139  | 4.513408  |
| H | 1.220413  | -5.837401 | -4.387616 | H | -3.633137  | -5.321285 | 5.883242  |
| H | -1.705569 | -4.104791 | -1.767841 | H | -1.728082  | 5.387363  | 0.441566  |
| H | 0.023420  | -8.002095 | -4.302723 | H | -0.976688  | 0.534578  | -3.860574 |
| H | -2.935388 | -6.254028 | -1.714899 | H | -0.200445  | -6.989305 | 8.067122  |
| H | -2.074167 | -8.216169 | -2.979138 | H | -1.661079  | 5.957811  | 3.483433  |
| H | 0.238556  | -3.327047 | -5.350525 | H | 1.106756   | -0.836023 | -4.025851 |
| H | -3.750704 | -5.011857 | -7.086709 | H | 3.570050   | 0.138657  | -2.570545 |
| H | -3.911825 | -5.135654 | -5.327129 | H | 3.296249   | -3.917930 | 0.912898  |
| H | -4.331289 | -2.617879 | -7.024975 | C | 0.278583   | -0.688326 | 0.111964  |
| H | -5.468068 | -3.304284 | -5.854569 | C | 1.067459   | 0.568957  | 0.571502  |
| H | -3.735048 | -1.291955 | -5.089216 | H | 0.368752   | 1.162268  | 1.167101  |
| H | -4.090876 | -2.614756 | -3.974144 | H | 0.933479   | -1.357862 | -0.444721 |
| H | -1.549387 | -4.796107 | -5.477403 | C | 4.423395   | -0.350838 | 3.096884  |
| H | 1.695104  | 2.021344  | -3.645575 | C | 3.124949   | -0.495352 | 3.585903  |

C 4.672205 0.092039 1.799718  
C 2.057650 -0.182720 2.752264  
H 2.962837 -0.843240 4.598094  
C 3.592629 0.395149 0.974875  
H 5.691337 0.192033 1.450337  
C 2.276363 0.259081 1.434288  
H 1.044662 -0.296885 3.117280  
H 3.793401 0.743308 -0.030129  
H -0.515668 -0.348507 -0.569596  
H -3.745751 6.553530 -1.318928  
H -3.617441 8.382535 3.307539  
H -3.833322 5.747110 3.862771  
H -8.471214 -0.795383 -2.935614  
H -1.695253 -3.735823 -6.895283  
H 1.725756 4.327404 3.902617  
O 0.757158 5.028888 2.270874  
H -0.028743 5.599205 2.095404  
H -4.089536 3.388691 4.734032  
N 5.553956 -0.664522 3.970791  
O 5.314426 -1.055302 5.116623  
O 6.694930 -0.522203 3.522641  
S 1.807827 -3.087230 7.030135  
C 0.836125 -1.632676 7.560818  
H 0.540913 -1.719532 8.609723  
H 1.476695 -0.756292 7.443361  
H -0.052404 -1.512745 6.936172  
H -9.197896 -3.666644 -2.078937  
C -6.538518 -4.480458 -2.262440  
H -6.506944 -4.670688 -3.341384  
H -5.519574 -4.582822 -1.873438  
H -7.148893 -5.268754 -1.803993  
C -7.099105 -2.823456 -0.442139  
H -7.753098 -3.529825 0.084994  
H -6.088866 -2.940085 -0.036001  
H -7.435899 -1.811220 -0.199176  
H -6.468551 -2.343409 -2.436407  
H 1.339363 -5.704199 5.726597

**TS2-S-C1-r3**

C 3.054607 -0.831534 -5.710828  
C 2.032040 -1.954818 -5.531574  
O 1.717801 -2.681764 -6.481120  
N 1.505575 -2.098369 -4.284661  
C 0.552204 -3.162399 -3.985366  
C -0.893665 -2.659698 -4.120603  
O -1.230879 -1.578467 -3.602851  
C 0.796151 -3.741798 -2.567503  
C 0.032495 -5.025552 -2.317471  
C 0.574032 -6.261241 -2.703710  
C -1.238625 -5.009293 -1.726748  
C -0.140643 -7.446651 -2.520661  
C -1.957246 -6.192876 -1.544087  
C -1.412957 -7.415423 -1.944849  
N -1.787711 -3.425055 -4.787296  
C -1.580733 -4.751456 -5.436054  
C -3.009951 -5.216909 -5.742053  
C -3.773829 -3.905643 -5.981567  
C -3.178893 -2.957295 -4.934789  
C 3.711611 2.593716 -2.724341  
C 4.942245 1.667267 -2.686667  
O 6.068752 2.158360 -2.832698  
C 2.300147 2.022007 -3.040626  
C 1.660742 0.918765 -2.143890

O 1.349947 1.498571 -0.893908  
O 2.125240 -0.268870 -2.153178  
N 4.732587 0.349565 -2.430663  
C 5.832282 -0.579637 -2.202919  
C 5.602584 -2.002298 -2.739067  
C 4.880313 -2.956010 -1.824388  
C 4.177651 -2.682498 -0.673711  
C 4.844738 -4.390530 -1.978976  
C 4.103577 -4.916645 -0.880407  
C 5.374130 -5.284076 -2.928775  
N 3.710840 -3.850979 -0.104669  
C 3.885624 -6.290102 -0.714283  
C 5.160471 -6.648724 -2.767374  
C 4.423107 -7.145839 -1.670647  
C -3.567798 -3.747592 5.726986  
C -2.889551 -4.048912 4.540315  
C -3.672694 -2.405273 6.110551  
C -2.325912 -3.046508 3.744070  
C -3.115888 -1.392476 5.329624  
C -2.435838 -1.703450 4.139365  
O -1.922647 -0.662492 3.429231  
C -0.379094 -5.857785 7.910590  
C 0.829652 -5.036490 8.371001  
C 1.265788 -4.027696 7.307590  
C -8.853921 -2.044861 -2.873664  
C -8.307385 -3.476555 -2.898549  
C -6.903205 -3.649186 -2.286229  
C 2.462312 -6.119112 3.298605  
C 2.652937 -4.733411 3.290547  
C 1.364283 -6.642834 2.599644  
C 1.774940 -3.883748 2.610551  
C 0.481607 -5.813269 1.918262  
C 0.645770 -4.393859 1.896867  
O -0.202675 -3.632149 1.266625  
C -4.155462 8.430690 0.923091  
C -2.643678 8.700589 0.888737  
C -1.946252 7.584684 0.109114  
O -1.835764 6.458767 0.756359  
O -1.610040 7.758019 -1.069632  
C -4.240053 6.077668 3.943489  
C -2.804969 6.072994 4.500586  
O -2.602526 5.946544 5.714568  
C -5.069069 4.977444 4.628729  
N -1.809710 6.199864 3.588114  
C -0.392200 6.071409 3.929173  
C 0.340704 5.019658 3.076298  
C -0.363820 3.661755 3.082175  
C -3.994186 5.243749 -2.125690  
C -2.866299 4.283742 -1.968172  
C -2.526971 3.134753 -2.639844  
N -1.882388 4.464542 -1.019602  
C -0.995839 3.463541 -1.135396  
C -1.357987 2.631576 -2.108152  
O 0.158434 0.855531 -2.941997  
O -0.149410 -1.127415 1.309807  
H 3.380264 -0.389649 -4.769056  
H 2.614376 -0.051507 -6.340321  
H 1.870902 -3.922972 -2.475528  
H 0.524266 -2.990342 -1.821724  
H 1.568411 -6.294542 -3.141027  
H -1.655861 -4.066690 -1.387440  
H 0.298942 -8.393482 -2.821830  
H -2.937811 -6.160445 -1.077128



H -1.970384 -8.336351 -1.798904  
H 0.737672 -3.942905 -4.725387  
H -3.041969 -5.901619 -6.593381  
H -3.421460 -5.738876 -4.871417  
H -3.569039 -3.528173 -6.989697  
H -4.856365 -4.011862 -5.874892  
H -3.189740 -1.906399 -5.232463  
H -3.701130 -3.034133 -3.972525  
H -1.051531 -5.434633 -4.771633  
H 2.295332 1.606108 -4.051033  
H 1.611747 2.871632 -3.053233  
H 3.691483 3.102920 -1.751994  
H 6.592269 -2.428317 -2.953310  
H 5.099526 -1.939251 -3.713448  
H 3.959120 -1.732649 -0.209079  
H 5.941667 -4.913858 -3.778632  
H 5.565434 -7.346269 -3.495470  
H 3.315620 -6.666494 0.130130  
H 4.272629 -8.217222 -1.571104  
H 6.071376 -0.631785 -1.130958  
H -2.790497 -5.083424 4.221211  
H -4.193729 -2.139973 7.027017  
H -1.793339 -3.301531 2.829243  
H -3.195254 -0.350923 5.626554  
H -1.424917 -0.935878 2.624619  
H 0.586348 -4.504669 9.298946  
H 1.518287 -4.536647 6.371123  
H 0.456030 -3.320291 7.098624  
H -0.142797 -6.438196 7.012132  
H -8.276538 -3.825428 -3.939537  
H -6.227546 -2.954608 -2.808917  
H -8.999185 -1.679228 -1.852436  
H 1.195479 -7.718458 2.592188  
H 3.501951 -4.304007 3.819864  
H -0.365504 -6.229290 1.379226  
H 1.916000 -2.805446 2.640795  
H -0.097134 -2.166053 1.312764  
H -2.439387 9.660088 0.404599  
H -2.251149 8.735665 1.911029  
H -4.569951 8.433905 -0.090988  
H -5.028915 5.100435 5.712995  
H -6.114219 5.016985 4.306700  
H -4.680291 7.061259 4.147602  
H 0.239207 2.932991 2.536415  
H -0.510181 3.291945 4.103102  
H -1.344675 3.729301 2.601967  
H -0.345149 5.800623 4.986483  
H -4.571896 5.008567 -3.022802  
H -4.677292 5.213605 -1.268529  
H -3.035735 2.648751 -3.459098  
H -0.101760 3.371232 -0.540159  
H -0.602671 1.626021 -2.535014  
H -4.685206 9.194368 1.502483  
H -9.821531 -1.985849 -3.383317  
H 3.918317 -1.235631 -6.244768  
H 6.706760 -0.144061 -2.692595  
H 3.938815 3.364799 -3.465087  
H 3.150248 -6.772115 3.827218  
H -0.696722 -6.559349 8.688905  
H 0.119060 7.034540 3.802496  
H -4.003962 -4.535261 6.333497  
H -1.823151 5.264998 -0.332918  
H -0.175698 -0.067119 -2.989711

H -1.230563 -5.211284 7.671385  
H -2.035798 6.320211 2.594990  
H 1.757492 -1.435614 -3.541786  
H 3.767064 0.009883 -2.302277  
H 3.150510 -3.909978 0.741125  
C 0.392465 -0.671223 0.084234  
C 0.997399 0.742834 0.291755  
H 0.186283 1.330930 0.738861  
H 1.162649 -1.356292 -0.274064  
C 4.207004 0.808447 3.168140  
C 2.893408 0.623199 3.602730  
C 4.513098 0.960558 1.816568  
C 1.871878 0.590953 2.660492  
H 2.685505 0.518387 4.659361  
C 3.476729 0.934682 0.887734  
H 5.540816 1.104624 1.508725  
C 2.146845 0.749564 1.289357  
H 0.851015 0.432745 2.985505  
H 3.705507 1.063421 -0.160673  
H -0.376210 -0.590820 -0.698199  
H -3.616113 6.267936 -2.208815  
H -4.369616 7.457679 1.368318  
H -4.230430 5.939620 2.858985  
H -8.170320 -1.352691 -3.379021  
H -0.991437 -4.624158 -6.352234  
H 1.334074 4.899875 3.529392  
O 0.593543 5.474164 1.748101  
H -0.240262 5.814332 1.360558  
H -4.676858 3.984717 4.386304  
H -9.006321 -4.145578 -2.375549  
C -6.384006 -5.075067 -2.522489  
H -5.366145 -5.197472 -2.136318  
H -7.020960 -5.811778 -2.016896  
H -6.370597 -5.324824 -3.589581  
C -6.866469 -3.303400 -0.790115  
H -7.158225 -2.266332 -0.599419  
H -7.547379 -3.952412 -0.224808  
H -5.860185 -3.441853 -0.380968  
N 5.285168 0.854912 4.152074  
O 4.991835 0.762025 5.349094  
O 6.443248 0.987643 3.745737  
H 1.665282 -5.707944 8.604708  
C 2.885503 -1.915306 6.458440  
H 2.008254 -1.265820 6.401660  
H 3.774229 -1.302484 6.617704  
H 2.993509 -2.463236 5.519605  
S 2.737068 -3.072401 7.864587

**Int2-S-C1-r3**

C 3.102505 -0.877402 -5.682003  
C 2.063807 -1.985620 -5.497280  
O 1.735252 -2.705692 -6.448610  
N 1.545503 -2.129500 -4.247373  
C 0.600008 -3.203898 -3.951495  
C -0.851238 -2.721148 -4.080758  
O -1.196339 -1.642036 -3.567337  
C 0.856609 -3.788705 -2.536187  
C 0.169844 -5.119468 -2.312838  
C 0.750367 -6.306814 -2.785452  
C -1.067364 -5.195795 -1.659380  
C 0.105288 -7.534539 -2.627338  
C -1.718775 -6.421859 -1.504350  
C -1.137668 -7.594484 -1.991881

|   |           |           |           |   |           |           |           |
|---|-----------|-----------|-----------|---|-----------|-----------|-----------|
| N | -1.739732 | -3.506022 | -4.735865 | O | 0.297461  | 0.772831  | -2.838108 |
| C | -1.512308 | -4.820798 | -5.402203 | O | -0.226931 | -1.106545 | 1.316603  |
| C | -2.934755 | -5.308890 | -5.704029 | H | 3.403159  | -0.407732 | -4.745324 |
| C | -3.724171 | -4.009490 | -5.924655 | H | 2.690195  | -0.116597 | -6.352317 |
| C | -3.138958 | -3.060607 | -4.872672 | H | 1.939615  | -3.903159 | -2.429912 |
| C | 3.715800  | 2.583794  | -2.727699 | H | 0.531436  | -3.068136 | -1.781436 |
| C | 4.956393  | 1.667580  | -2.674530 | H | 1.719241  | -6.266960 | -3.277713 |
| O | 6.081002  | 2.166109  | -2.830364 | H | -1.502736 | -4.294736 | -1.240547 |
| C | 2.314282  | 1.990336  | -3.045143 | H | 0.574339  | -8.442677 | -2.995693 |
| C | 1.620205  | 0.867977  | -2.183178 | H | -2.676231 | -6.461104 | -0.992189 |
| O | 1.369467  | 1.492739  | -0.868451 | H | -1.642433 | -8.548299 | -1.866970 |
| O | 2.190944  | -0.312392 | -2.133421 | H | 0.793452  | -3.979159 | -4.695256 |
| N | 4.749893  | 0.356780  | -2.397278 | H | -2.960194 | -5.985240 | -6.562294 |
| C | 5.850299  | -0.571596 | -2.154801 | H | -3.330867 | -5.847741 | -4.836379 |
| C | 5.571759  | -2.021798 | -2.611862 | H | -3.533611 | -3.618465 | -6.930462 |
| C | 5.039258  | -2.951197 | -1.551394 | H | -4.803875 | -4.136658 | -5.811777 |
| C | 3.967378  | -2.751117 | -0.709744 | H | -3.169014 | -2.007585 | -5.161687 |
| C | 5.593315  | -4.234733 | -1.194973 | H | -3.655825 | -3.154078 | -3.908854 |
| C | 4.804233  | -4.752177 | -0.125344 | H | -0.966541 | -5.502808 | -4.750232 |
| C | 6.676484  | -5.001501 | -1.665110 | H | 2.325411  | 1.579527  | -4.059617 |
| N | 3.822120  | -3.827336 | 0.142455  | H | 1.619860  | 2.837040  | -3.073599 |
| C | 5.071402  | -5.990532 | 0.472151  | H | 3.684252  | 3.098420  | -1.758210 |
| C | 6.945227  | -6.231184 | -1.074984 | H | 6.518880  | -2.437424 | -2.973123 |
| C | 6.149734  | -6.720735 | -0.016133 | H | 4.910673  | -1.993974 | -3.487264 |
| C | -3.595500 | -3.708199 | 5.733099  | H | 3.284322  | -1.913927 | -0.668423 |
| C | -2.875832 | -4.013095 | 4.571585  | H | 7.296892  | -4.639116 | -2.480969 |
| C | -3.734940 | -2.363899 | 6.096113  | H | 7.780000  | -6.827983 | -1.432819 |
| C | -2.298535 | -3.011703 | 3.782923  | H | 4.454950  | -6.358509 | 1.287489  |
| C | -3.166029 | -1.352308 | 5.322638  | H | 6.384227  | -7.685518 | 0.425366  |
| C | -2.439298 | -1.665895 | 4.160251  | H | 6.116602  | -0.577405 | -1.088731 |
| O | -1.908695 | -0.625770 | 3.463750  | H | -2.754744 | -5.049460 | 4.266293  |
| C | -0.412499 | -5.776300 | 7.965000  | H | -4.291779 | -2.096024 | 6.990524  |
| C | 0.683321  | -4.733749 | 7.710991  | H | -1.739277 | -3.268552 | 2.884660  |
| C | 0.102060  | -3.332206 | 7.506782  | H | -3.273539 | -0.308416 | 5.602002  |
| C | -8.821603 | -2.128903 | -2.927600 | H | -1.411898 | -0.895275 | 2.653591  |
| C | -8.100488 | -3.463061 | -2.705889 | H | 1.382117  | -4.722522 | 8.556932  |
| C | -6.759947 | -3.362542 | -1.951229 | H | -0.517255 | -3.302290 | 6.604921  |
| C | 2.467600  | -6.070800 | 3.379100  | H | -0.525672 | -3.048967 | 8.359371  |
| C | 2.570371  | -4.677408 | 3.459256  | H | -1.124795 | -5.808640 | 7.133711  |
| C | 1.463968  | -6.614115 | 2.561641  | H | -7.914143 | -3.930908 | -3.681979 |
| C | 1.705185  | -3.843282 | 2.745817  | H | -6.123019 | -2.653265 | -2.502103 |
| C | 0.592250  | -5.799354 | 1.849064  | H | -9.120575 | -1.662810 | -1.983598 |
| C | 0.671964  | -4.372842 | 1.911372  | H | 1.362579  | -7.695451 | 2.482802  |
| O | -0.165433 | -3.623441 | 1.249215  | H | 3.336480  | -4.227260 | 4.087798  |
| C | -4.213725 | 8.413900  | 0.793183  | H | -0.178899 | -6.233411 | 1.218330  |
| C | -2.716651 | 8.677853  | 0.655916  | H | 1.789049  | -2.763109 | 2.835615  |
| C | -1.876070 | 7.402153  | 0.722408  | H | -0.122149 | -2.137784 | 1.309587  |
| O | -2.538263 | 6.302737  | 0.718341  | H | -2.491507 | 9.170058  | -0.299837 |
| O | -0.628167 | 7.494749  | 0.787439  | H | -2.355375 | 9.362976  | 1.431794  |
| C | -4.309341 | 6.093202  | 3.838019  | H | -4.560891 | 7.721707  | 0.023454  |
| C | -2.887954 | 6.188015  | 4.418641  | H | -5.135428 | 5.240218  | 5.657737  |
| O | -2.707501 | 6.465229  | 5.610542  | H | -6.177427 | 5.034001  | 4.234655  |
| C | -5.140386 | 5.034734  | 4.583981  | H | -4.769400 | 7.079244  | 3.971442  |
| N | -1.880125 | 5.936229  | 3.546702  | H | 0.829417  | 2.940273  | 3.141166  |
| C | -0.461451 | 6.108970  | 3.854816  | H | 0.463446  | 3.597142  | 4.746373  |
| C | 0.411766  | 5.059967  | 3.143436  | H | -0.844183 | 3.346580  | 3.568879  |
| C | 0.200568  | 3.650245  | 3.684887  | H | -0.336112 | 6.041022  | 4.938007  |
| C | -4.009497 | 5.195296  | -2.219597 | H | -4.605675 | 4.845424  | -3.064943 |
| C | -2.860059 | 4.273521  | -1.984781 | H | -4.656644 | 5.253397  | -1.339317 |
| C | -2.416352 | 3.183905  | -2.686244 | H | -2.805236 | 2.715760  | -3.576122 |
| N | -1.983914 | 4.432552  | -0.926114 | H | -0.219040 | 3.382521  | -0.304921 |
| C | -1.047573 | 3.486509  | -0.986679 | H | -0.691951 | 1.890711  | -2.345003 |
| N | -1.289791 | 2.712458  | -2.046223 | H | -4.783362 | 9.346278  | 0.698255  |

|                    |           |           |           |   |           |           |           |
|--------------------|-----------|-----------|-----------|---|-----------|-----------|-----------|
| H                  | -9.728487 | -2.267979 | -3.525736 | C | -0.058043 | -3.647795 | -3.670544 |
| H                  | 3.978559  | -1.307939 | -6.174187 | C | -1.319428 | -2.816851 | -3.958897 |
| H                  | 6.715705  | -0.171697 | -2.691249 | O | -1.382853 | -1.631480 | -3.585799 |
| H                  | 3.940697  | 3.352265  | -3.472502 | C | -0.026108 | -4.088973 | -2.183648 |
| H                  | 3.141626  | -6.712991 | 3.938291  | C | -1.095214 | -5.106718 | -1.845268 |
| H                  | 0.017083  | -6.776749 | 8.079065  | C | -0.874380 | -6.472763 | -2.079426 |
| H                  | -0.139555 | 7.111075  | 3.540575  | C | -2.333095 | -4.711507 | -1.320185 |
| H                  | -4.038439 | -4.495898 | 6.334505  | C | -1.868563 | -7.416153 | -1.813536 |
| H                  | -2.080188 | 5.186572  | -0.161973 | C | -3.331601 | -5.651844 | -1.056747 |
| H                  | 0.019945  | -0.163895 | -2.890625 | C | -3.104480 | -7.007307 | -1.306433 |
| H                  | -0.974724 | -5.546243 | 8.877033  | N | -2.355529 | -3.406825 | -4.599121 |
| H                  | -2.112155 | 5.809539  | 2.562747  | C | -2.469131 | -4.807837 | -5.092332 |
| H                  | 1.809786  | -1.470580 | -3.496109 | C | -3.957155 | -4.934663 | -5.443478 |
| H                  | 3.770420  | 0.021045  | -2.261985 | C | -4.351103 | -3.511039 | -5.866435 |
| H                  | 3.132313  | -3.898483 | 0.885008  | C | -3.573662 | -2.626692 | -4.885277 |
| C                  | 0.263864  | -0.592488 | 0.090031  | C | 4.359404  | 1.281033  | -2.723202 |
| C                  | 1.028922  | 0.744753  | 0.314176  | C | 5.312519  | 0.079660  | -2.579548 |
| H                  | 0.309209  | 1.388801  | 0.840385  | O | 6.524435  | 0.255463  | -2.767272 |
| H                  | 0.927369  | -1.314480 | -0.387473 | C | 2.881535  | 1.120699  | -3.178355 |
| C                  | 4.356360  | 0.402631  | 3.045818  | C | 1.822335  | 0.233618  | -2.463046 |
| C                  | 3.057860  | 0.183866  | 3.510446  | O | 1.519714  | 1.221558  | -0.976824 |
| C                  | 4.606513  | 0.724770  | 1.712616  | O | 2.090352  | -0.964345 | -2.123444 |
| C                  | 1.997630  | 0.293807  | 2.618019  | N | 4.787062  | -1.103487 | -2.173306 |
| H                  | 2.893009  | -0.062181 | 4.551676  | C | 5.635903  | -2.245607 | -1.843398 |
| C                  | 3.532944  | 0.824730  | 0.832715  | C | 5.066571  | -3.612415 | -2.251808 |
| H                  | 5.622666  | 0.896788  | 1.381282  | C | 4.109761  | -4.255704 | -1.283639 |
| C                  | 2.217688  | 0.603697  | 1.260828  | C | 3.479965  | -3.701987 | -0.192469 |
| H                  | 0.987298  | 0.124074  | 2.966959  | C | 3.717274  | -5.643986 | -1.306048 |
| H                  | 3.716983  | 1.074373  | -0.201117 | C | 2.851896  | -5.857729 | -0.193556 |
| H                  | -0.557190 | -0.379457 | -0.609284 | C | 4.020777  | -6.730201 | -2.147866 |
| H                  | -3.664918 | 6.210870  | -2.440678 | N | 2.726260  | -4.655760 | 0.463234  |
| H                  | -4.451349 | 7.974447  | 1.762883  | C | 2.295974  | -7.111548 | 0.090804  |
| H                  | -4.277089 | 5.882863  | 2.766078  | C | 3.470486  | -7.976596 | -1.869617 |
| H                  | -8.179611 | -1.417106 | -3.459668 | C | 2.616669  | -8.164062 | -0.760755 |
| H                  | -0.931487 | -4.671914 | -6.320628 | C | -4.473892 | -2.358493 | 5.841586  |
| H                  | 1.458413  | 5.355524  | 3.335213  | C | -3.792308 | -2.905588 | 4.746953  |
| H                  | -4.729941 | 4.031882  | 4.427582  | C | -4.375375 | -0.979572 | 6.062850  |
| O                  | 0.164128  | 5.021407  | 1.740342  | C | -3.027014 | -2.110904 | 3.886919  |
| H                  | 0.010910  | 5.933625  | 1.391784  | C | -3.615867 | -0.171366 | 5.215948  |
| H                  | -8.762657 | -4.152058 | -2.161401 | C | -2.931616 | -0.728813 | 4.120518  |
| C                  | -6.045154 | -4.721761 | -1.939288 | O | -2.213367 | 0.121769  | 3.341536  |
| H                  | -5.881448 | -5.096883 | -2.955953 | C | -1.952297 | -4.961096 | 8.343097  |
| H                  | -5.069913 | -4.654400 | -1.445128 | C | -1.135394 | -3.758053 | 8.827142  |
| H                  | -6.638828 | -5.470882 | -1.400434 | C | -0.835588 | -2.777993 | 7.691013  |
| C                  | -6.927794 | -2.829395 | -0.520548 | C | -8.944305 | -0.229351 | -3.119073 |
| H                  | -7.364940 | -1.826489 | -0.502974 | C | -8.607925 | -1.423383 | -2.219080 |
| H                  | -7.579618 | -3.489099 | 0.066244  | C | -7.148034 | -1.480764 | -1.727210 |
| H                  | -5.961897 | -2.776148 | -0.007425 | C | 0.872904  | -6.305303 | 3.913300  |
| N                  | 5.474506  | 0.304909  | 3.978412  | C | 1.385602  | -5.003286 | 3.896727  |
| O                  | 5.231691  | 0.036422  | 5.159603  | C | -0.253200 | -6.579355 | 3.121212  |
| O                  | 6.616443  | 0.496724  | 3.547049  | C | 0.802994  | -3.999366 | 3.115654  |
| H                  | 1.265410  | -5.014971 | 6.825289  | C | -0.846425 | -5.593990 | 2.340047  |
| S                  | 1.445227  | -2.085560 | 7.334930  | C | -0.346668 | -4.252923 | 2.300819  |
| C                  | 0.448028  | -0.586779 | 7.016017  | O | -0.924432 | -3.344108 | 1.571543  |
| H                  | -0.218998 | -0.374911 | 7.855670  | C | -1.967950 | 9.126087  | 0.048818  |
| H                  | 1.146967  | 0.244398  | 6.901162  | C | -0.537148 | 9.509652  | 0.438829  |
| H                  | -0.136931 | -0.692273 | 6.099561  | C | 0.455331  | 8.448807  | -0.054142 |
| <b>TS3-S-C1-r3</b> |           |           |           | O | 0.154947  | 7.239404  | 0.311811  |
| C                  | 2.981155  | -2.144503 | -5.452644 | O | 1.424626  | 8.768849  | -0.753091 |
| C                  | 1.710505  | -2.969930 | -5.239569 | C | -2.704266 | 7.142504  | 3.240952  |
| O                  | 1.245786  | -3.666581 | -6.149501 | C | -1.353259 | 6.759167  | 3.862729  |
| N                  | 1.145646  | -2.894559 | -4.004680 | O | -1.222067 | 6.670709  | 5.087968  |
|                    |           |           |           | C | -3.858286 | 6.412056  | 3.947038  |

|   |           |           |           |   |           |           |           |
|---|-----------|-----------|-----------|---|-----------|-----------|-----------|
| N | -0.341678 | 6.510776  | 2.987429  | H | 0.920970  | 2.901569  | 4.553091  |
| C | 1.027094  | 6.219934  | 3.417555  | H | 1.007992  | 4.360582  | 5.565727  |
| C | 1.332007  | 4.708946  | 3.444840  | H | -0.418973 | 4.069034  | 4.566082  |
| C | 0.669505  | 3.964673  | 4.602979  | H | 1.198241  | 6.655926  | 4.406018  |
| C | -2.493189 | 5.730870  | -2.721554 | H | -3.091302 | 5.173483  | -3.445203 |
| C | -1.405133 | 4.851688  | -2.168906 | H | -3.156975 | 6.083889  | -1.925748 |
| C | -1.074106 | 3.538456  | -2.414910 | H | -1.516292 | 2.820497  | -3.086795 |
| N | -0.495736 | 5.292896  | -1.220911 | H | 1.107669  | 4.348698  | -0.162928 |
| C | 0.332704  | 4.293176  | -0.912816 | H | 0.564422  | 2.277630  | -1.474988 |
| N | 0.008977  | 3.213370  | -1.619823 | H | -2.702192 | 9.837641  | 0.443005  |
| O | 0.626379  | 0.447240  | -3.135077 | H | -9.974993 | -0.291618 | -3.484342 |
| O | -0.473198 | -0.847557 | 1.407876  | H | 3.748407  | -2.797164 | -5.877321 |
| H | 3.356450  | -1.687352 | -4.536913 | H | 6.584913  | -2.076912 | -2.357729 |
| H | 2.772137  | -1.361531 | -6.188377 | H | 4.848678  | 1.952850  | -3.432827 |
| H | 0.964687  | -4.513268 | -1.996160 | H | 1.332291  | -7.078920 | 4.521157  |
| H | -0.131154 | -3.206895 | -1.545998 | H | -2.163734 | -5.649861 | 9.167586  |
| H | 0.088920  | -6.799235 | -2.462426 | H | 1.693022  | 6.698415  | 2.694738  |
| H | -2.506502 | -3.663175 | -1.098366 | H | -5.067650 | -2.987140 | 6.497817  |
| H | -1.675381 | -8.469568 | -1.996524 | H | -0.362936 | 6.227396  | -0.719189 |
| H | -4.283604 | -5.325248 | -0.647517 | H | 0.071500  | -0.357613 | -3.059245 |
| H | -3.879329 | -7.739444 | -1.097178 | H | -2.909231 | -4.641515 | 7.916848  |
| H | -0.047136 | -4.534003 | -4.307949 | H | -0.428265 | 6.787094  | 2.000425  |
| H | -4.131056 | -5.683568 | -6.220317 | H | 1.515153  | -2.234150 | -3.309851 |
| H | -4.520853 | -5.232704 | -4.552734 | H | 3.761763  | -1.162869 | -2.049932 |
| H | -4.017484 | -3.316600 | -6.891925 | H | 2.158561  | -4.490735 | 1.290132  |
| H | -5.428112 | -3.330528 | -5.822316 | C | 0.105636  | -0.523346 | 0.151126  |
| H | -3.304324 | -1.648144 | -5.289106 | C | 1.053388  | 0.709621  | 0.265504  |
| H | -4.134952 | -2.458826 | -3.956920 | H | 0.434052  | 1.502865  | 0.719286  |
| H | -2.158688 | -5.518972 | -4.326553 | H | 0.669752  | -1.373616 | -0.238420 |
| H | 2.878418  | 0.725812  | -4.201960 | C | 4.215942  | 0.020403  | 3.123831  |
| H | 2.460957  | 2.127761  | -3.251882 | C | 2.905800  | 0.197405  | 3.576290  |
| H | 4.380267  | 1.797766  | -1.754881 | C | 4.526700  | 0.054465  | 1.764622  |
| H | 5.920804  | -4.291372 | -2.380114 | C | 1.896785  | 0.414989  | 2.645739  |
| H | 4.613938  | -3.526039 | -3.248934 | H | 2.697996  | 0.171124  | 4.638270  |
| H | 3.503281  | -2.686906 | 0.177029  | C | 3.501358  | 0.274833  | 0.849396  |
| H | 4.674953  | -6.597530 | -3.005697 | H | 5.550913  | -0.083490 | 1.441822  |
| H | 3.698736  | -8.821403 | -2.513815 | C | 2.176463  | 0.455336  | 1.266074  |
| H | 1.638773  | -7.249032 | 0.944277  | H | 0.876481  | 0.545717  | 2.984712  |
| H | 2.202063  | -9.149730 | -0.568061 | H | 3.724308  | 0.304758  | -0.205996 |
| H | 5.860077  | -2.254142 | -0.767173 | H | -0.665464 | -0.266635 | -0.591611 |
| H | -3.849558 | -3.973687 | 4.552751  | H | -2.076459 | 6.609789  | -3.224205 |
| H | -4.894704 | -0.524041 | 6.902200  | H | -2.212383 | 8.132729  | 0.425982  |
| H | -2.497731 | -2.555141 | 3.045148  | H | -2.707350 | 6.927747  | 2.168993  |
| H | -3.541189 | 0.898771  | 5.385333  | H | -8.284401 | -0.195480 | -3.994033 |
| H | -1.716427 | -0.320470 | 2.610886  | H | -1.831478 | -4.940244 | -5.974928 |
| H | -1.683438 | -3.236237 | 9.621592  | H | 2.419630  | 4.592461  | 3.518245  |
| H | -0.245700 | -3.264568 | 6.906553  | H | -3.793893 | 5.330965  | 3.787235  |
| H | -1.766174 | -2.418246 | 7.240848  | O | 0.977532  | 4.113404  | 2.188681  |
| H | -1.414595 | -5.519467 | 7.568987  | H | 0.033028  | 4.297547  | 2.069497  |
| H | -8.826162 | -2.351105 | -2.765131 | N | 5.281914  | -0.197015 | 4.094734  |
| H | -6.498576 | -1.469356 | -2.616529 | O | 4.988308  | -0.214264 | 5.295151  |
| H | -8.841646 | 0.723733  | -2.590786 | O | 6.434300  | -0.354402 | 3.676635  |
| H | -0.676069 | -7.583042 | 3.117962  | H | -9.275353 | -1.422964 | -1.344936 |
| H | 2.256116  | -4.759055 | 4.503342  | C | -6.886198 | -2.792376 | -0.972431 |
| H | -1.716010 | -5.823023 | 1.729661  | H | -7.108175 | -3.664707 | -1.597435 |
| H | 1.201886  | -2.986904 | 3.135988  | H | -5.841396 | -2.864346 | -0.651763 |
| H | -0.549299 | -1.866778 | 1.493743  | H | -7.513160 | -2.857696 | -0.074474 |
| H | -0.260516 | 10.486186 | 0.029770  | C | -6.772367 | -0.273407 | -0.855391 |
| H | -0.460567 | 9.572400  | 1.532631  | H | -6.873920 | 0.672764  | -1.395710 |
| H | -2.082661 | 9.106103  | -1.041572 | H | -7.413422 | -0.221656 | 0.033755  |
| H | -3.817097 | 6.596735  | 5.022689  | H | -5.735247 | -0.346915 | -0.511733 |
| H | -4.825888 | 6.753819  | 3.567509  | H | -0.193987 | -4.103517 | 9.271875  |
| H | -2.824591 | 8.227191  | 3.354604  | S | 0.106651  | -1.326511 | 8.316824  |

C 0.262562 -0.366608 6.768635  
H -0.720948 -0.100254 6.374421  
H 0.813657 0.545278 7.007829  
H 0.816465 -0.933935 6.016658

**Prod-S-C1-r3**

C 2.707804 -2.402659 -5.533630  
C 1.393491 -3.144544 -5.286442  
O 0.774638 -3.676793 -6.210901  
N 0.934387 -3.176144 -4.001000  
C -0.408735 -3.670651 -3.703613  
C -1.445228 -2.703308 -4.310813  
O -1.255447 -1.471039 -4.247122  
C -0.600098 -3.802569 -2.173518  
C -1.849183 -4.570201 -1.793369  
C -1.835001 -5.972577 -1.767788  
C -3.044264 -3.908131 -1.484767  
C -2.988935 -6.694695 -1.456035  
C -4.199791 -4.626285 -1.171888  
C -4.177561 -6.023108 -1.160771  
N -2.559645 -3.205633 -4.877003  
C -2.927097 -4.633003 -5.086744  
C -4.386835 -4.551104 -5.548241  
C -4.450446 -3.215892 -6.305638  
C -3.555607 -2.291556 -5.471553  
C 4.396010 0.893879 -2.819470  
C 5.252362 -0.385629 -2.769858  
O 6.416137 -0.373809 -3.181388  
C 3.166581 0.913028 -3.756655  
C 1.985909 0.019080 -3.409785  
O 1.490610 1.076942 -0.109112  
O 1.969790 -0.819296 -2.513295  
N 4.674437 -1.482940 -2.204551  
C 5.407122 -2.725108 -1.970620  
C 4.679798 -4.010076 -2.383101  
C 3.650564 -4.541181 -1.422576  
C 3.151467 -3.973646 -0.271576  
C 3.034133 -5.841267 -1.524446  
C 2.176693 -5.993230 -0.397603  
C 3.135546 -6.896360 -2.450251  
N 2.267389 -4.838304 0.345202  
C 1.432228 -7.159410 -0.177431  
C 2.398698 -8.055513 -2.236267  
C 1.556236 -8.184365 -1.110357  
C -4.549398 -2.076199 5.886001  
C -3.966195 -2.674956 4.766065  
C -4.324422 -0.715705 6.120648  
C -3.165555 -1.941514 3.889821  
C -3.524316 0.031463 5.257343  
C -2.933431 -0.575888 4.134996  
O -2.165605 0.194509 3.330272  
C -2.197601 -4.877701 8.337500  
C -0.908615 -4.078513 8.110476  
C -1.161845 -2.570179 8.164852  
C -8.990404 0.430940 -2.991422  
C -9.104431 -0.989137 -2.427612  
C -7.942093 -1.930217 -2.800132  
C 0.438603 -6.421804 3.856603  
C 0.926554 -5.113010 3.794199  
C -0.692781 -6.748568 3.095743  
C 0.311529 -4.148931 2.991458  
C -1.317809 -5.801909 2.290957  
C -0.840447 -4.459586 2.206228

O -1.445916 -3.582695 1.450736  
C -1.250092 9.199298 0.080006  
C 0.201958 9.482008 0.474387  
C 1.175262 8.380850 0.024933  
O 0.769431 7.170659 0.280006  
O 2.249760 8.680122 -0.507795  
C -2.085503 7.267279 3.279376  
C -0.759142 6.746332 3.862454  
O -0.637872 6.564187 5.080328  
C -3.275997 6.689714 4.060119  
N 0.236457 6.504340 2.973053  
C 1.564789 6.054805 3.389698  
C 2.157505 4.929223 2.531194  
C 1.229689 3.719187 2.432547  
C -2.086201 5.866310 -2.689503  
C -1.127720 4.834569 -2.177946  
C -1.055862 3.467606 -2.341388  
N -0.046562 5.151123 -1.379825  
C 0.610329 4.001575 -1.095702  
N 0.032568 2.950878 -1.660322  
O 0.958877 0.202476 -4.234519  
O -0.792583 -1.214879 1.611203  
H 3.256579 -2.173492 -4.619911  
H 2.478508 -1.471670 -6.060399  
H 0.282413 -4.316610 -1.781170  
H -0.618743 -2.800517 -1.733986  
H -0.910267 -6.502431 -1.980371  
H -3.065888 -2.822024 -1.474199  
H -2.956514 -7.780521 -1.437295  
H -5.113477 -4.094397 -0.923807  
H -5.075491 -6.582241 -0.913523  
H -0.505125 -4.653563 -4.170016  
H -4.669930 -5.411656 -6.159532  
H -5.047098 -4.523565 -4.674620  
H -4.033713 -3.333229 -7.312141  
H -5.466252 -2.825485 -6.405600  
H -3.049782 -1.520300 -6.056615  
H -4.117552 -1.788758 -4.675120  
H -2.808011 -5.208570 -4.169999  
H 3.457215 0.660710 -4.783712  
H 2.778865 1.936317 -3.807902  
H 4.059921 1.134828 -1.804222  
H 5.451550 -4.781943 -2.512268  
H 4.242433 -3.871922 -3.380505  
H 3.360880 -3.013147 0.178559  
H 3.780024 -6.806854 -3.320714  
H 2.469378 -8.876727 -2.944137  
H 0.783946 -7.251305 0.688498  
H 0.994394 -9.103388 -0.968143  
H 5.693490 -2.795790 -0.912122  
H -4.133727 -3.730128 4.565209  
H -4.774549 -0.230217 6.982903  
H -2.725876 -2.424169 3.021135  
H -3.345266 1.088551 5.430951  
H -1.711133 -0.354083 2.622308  
H -0.164801 -4.354593 8.868325  
H -1.851537 -2.270759 7.369292  
H -1.610129 -2.292183 9.125754  
H -2.951628 -4.628763 7.583211  
H -10.041976 -1.437874 -2.782923  
H -7.866428 -1.942411 -3.898636  
H -8.123512 0.964084 -2.589037  
H -1.093570 -7.760201 3.135116

H 1.798516 -4.832320 4.382090  
H -2.193755 -6.064157 1.703492  
H 0.679021 -3.126168 2.979676  
H -1.019047 -2.252456 1.513285  
H 0.544199 10.440008 0.071169  
H 0.274139 9.548239 1.569172  
H -1.367971 9.201854 -1.009963  
H -3.161090 6.897240 5.125816  
H -4.218623 7.124735 3.713767  
H -2.077664 8.361787 3.359466  
H 1.700396 2.946687 1.822191  
H 1.019928 3.304104 3.424933  
H 0.276756 3.991838 1.969284  
H 1.470123 5.718027 4.424569  
H -2.875961 5.386650 -3.273117  
H -2.560817 6.419911 -1.871072  
H -1.721935 2.832803 -2.910037  
H 1.487611 3.988359 -0.464893  
H 0.837033 1.524424 -0.696015  
H -1.931267 9.954804 0.486823  
H -9.879391 1.022241 -2.747425  
H 3.333143 -3.011258 -6.190470  
H 6.331892 -2.631057 -2.543129  
H 5.073526 1.685116 -3.143148  
H 0.922870 -7.166388 4.481492  
H -2.006826 -5.954044 8.278932  
H 2.267856 6.899697 3.379960  
H -5.174346 -2.655438 6.559297  
H 0.195935 6.054718 -0.939507  
H 0.225962 -0.451110 -4.057589  
H -2.627257 -4.666170 9.323188  
H 0.138237 6.785920 1.992256  
H 1.370308 -2.574978 -3.307693  
H 3.697197 -1.405121 -1.939615  
H 1.746156 -4.644202 1.195849  
C -0.055742 -0.703184 0.529116  
C 0.830253 0.478886 0.989611  
H 0.163799 1.198232 1.490001  
H 0.589937 -1.474297 0.086043  
C 3.748151 -0.872113 3.844797  
C 2.434479 -0.652084 4.264367  
C 4.142858 -0.651717 2.524549  
C 1.503177 -0.199211 3.336138  
H 2.157027 -0.835245 5.295116  
C 3.196086 -0.203952 1.608474  
H 5.171339 -0.825874 2.234960  
C 1.867422 0.025667 1.997852  
H 0.479613 -0.023134 3.646434  
H 3.483559 -0.019668 0.580879  
H -0.709981 -0.322670 -0.274522  
H -1.588467 6.599618 -3.334910  
H -1.564753 8.219793 0.442573  
H -2.156843 7.023876 2.215462  
H -8.892819 0.415449 -4.083442  
H -2.283909 -5.064413 -5.863715  
H -3.336574 5.604157 3.933973  
H 3.072408 4.614692 3.054135  
O 2.594133 5.372618 1.248262  
H 1.955898 6.024499 0.869254  
H -9.185960 -0.943954 -1.332006  
C -8.238696 -3.363051 -2.333933  
H -7.437071 -4.051234 -2.623897  
H -8.331964 -3.405736 -1.241579

H -9.175154 -3.738320 -2.761993  
C -6.595553 -1.447963 -2.240802  
H -6.326944 -0.454105 -2.611140  
H -6.623785 -1.398539 -1.144982  
H -5.787751 -2.132931 -2.519934  
N 4.736768 -1.338834 4.812920  
O 4.376401 -1.514441 5.980908  
O 5.891746 -1.538222 4.421119  
H -0.477942 -4.340415 7.136756  
S 0.405722 -1.627849 7.963320  
C -0.254920 0.076638 7.980177  
H 0.589681 0.751603 7.828015  
H -0.977023 0.219007 7.172611  
H -0.725382 0.305750 8.939917

**TS1-S-C2-r3**

C 2.447800 0.524000 -6.160500  
C 1.619598 -0.759370 -6.132632  
O 1.411095 -1.416227 -7.157841  
N 1.117994 -1.117923 -4.915031  
C 0.228500 -2.266100 -4.760900  
C -1.240061 -1.787137 -4.733166  
O -1.557578 -0.819612 -4.022925  
C 0.562127 -3.017959 -3.447650  
C -0.236010 -4.290394 -3.258612  
C 0.217383 -5.504763 -3.796904  
C -1.452559 -4.283248 -2.560965  
C -0.524914 -6.678430 -3.647187  
C -2.198845 -5.453763 -2.411702  
C -1.738364 -6.655112 -2.955243  
N -2.164720 -2.440960 -5.468751  
C -1.979200 -3.635500 -6.320500  
C -3.415358 -4.034298 -6.692047  
C -4.172921 -2.697060 -6.684204  
C -3.558501 -1.959719 -5.489706  
C 3.274500 3.269400 -2.573900  
C 4.525747 2.409927 -2.808030  
O 5.617521 2.955584 -3.005896  
C 1.880227 2.632393 -2.750503  
C 1.575916 1.434503 -1.831189  
O 1.324952 1.694006 -0.607237  
O 1.628950 0.269156 -2.320353  
N 4.403457 1.057837 -2.743574  
C 5.559000 0.190600 -2.951900  
C 5.171834 -1.296225 -3.093132  
C 5.164224 -2.074979 -1.809032  
C 4.077817 -2.517049 -1.093124  
C 6.331152 -2.519566 -1.084316  
C 5.869139 -3.226755 0.062986  
C 7.717754 -2.399988 -1.292384  
N 4.494224 -3.210006 0.026232  
C 6.746981 -3.801240 0.990491  
C 8.592603 -2.968230 -0.373223  
C 8.111306 -3.659928 0.758704  
C -2.848100 -5.148700 4.928000  
C -2.278025 -4.920518 3.671990  
C -2.767462 -4.143425 5.897625  
C -1.631315 -3.717018 3.380101  
C -2.124537 -2.937924 5.621955  
C -1.544395 -2.714713 4.360895  
O -0.921343 -1.528048 4.160144  
C 0.627200 -7.479700 6.298300  
C 0.827976 -6.434016 7.401110

|   |           |           |           |   |           |           |           |
|---|-----------|-----------|-----------|---|-----------|-----------|-----------|
| C | 1.110155  | -5.043719 | 6.826582  | H | -2.062870 | -2.152746 | 6.369196  |
| C | -9.050900 | -1.976800 | -2.574000 | H | -0.544496 | -1.447922 | 3.242229  |
| C | -8.690615 | -2.776656 | -1.316371 | H | -0.067368 | -6.390111 | 8.033196  |
| C | -7.986932 | -1.969885 | -0.206508 | H | 2.025648  | -5.057061 | 6.224444  |
| C | 2.988500  | -6.583600 | 1.498900  | H | 0.283876  | -4.717534 | 6.187077  |
| C | 2.812272  | -5.513385 | 2.378114  | H | 1.514963  | -7.560839 | 5.661408  |
| C | 2.332424  | -6.565234 | 0.264291  | H | -8.037399 | -3.611290 | -1.604496 |
| C | 2.001954  | -4.428190 | 2.029680  | H | -7.102158 | -1.492463 | -0.654434 |
| C | 1.524762  | -5.490885 | -0.098206 | H | -9.775954 | -1.184243 | -2.363318 |
| C | 1.360681  | -4.405778 | 0.778722  | H | 2.456886  | -7.392962 | -0.428637 |
| O | 0.585101  | -3.373046 | 0.371298  | H | 3.306370  | -5.515112 | 3.345956  |
| C | -4.397300 | 7.714700  | 2.962000  | H | 1.021700  | -5.465119 | -1.058255 |
| C | -3.217861 | 8.037051  | 2.043945  | H | 1.861383  | -3.599898 | 2.715392  |
| C | -2.130885 | 6.953502  | 2.068301  | H | 0.635103  | -2.594975 | 0.994435  |
| O | -2.531914 | 5.737298  | 2.099949  | H | -3.571992 | 8.128796  | 1.007580  |
| O | -0.933199 | 7.324035  | 2.059029  | H | -2.757697 | 8.994685  | 2.305790  |
| C | -4.080300 | 4.772600  | 5.393000  | H | -4.852614 | 6.763494  | 2.679086  |
| C | -2.592223 | 4.789864  | 5.777567  | H | -4.484781 | 3.005866  | 6.596420  |
| O | -2.250971 | 4.562840  | 6.946762  | H | -5.733305 | 3.341378  | 5.378812  |
| C | -4.656600 | 3.354700  | 5.574600  | H | -4.595917 | 5.473868  | 6.057735  |
| N | -1.702129 | 5.022234  | 4.779806  | H | 0.768314  | 3.120006  | 2.255404  |
| C | -0.256800 | 5.000400  | 5.024700  | H | -0.151970 | 2.559673  | 3.674945  |
| C | 0.626365  | 4.593405  | 3.826395  | H | -0.880845 | 3.704099  | 2.535527  |
| C | 0.052928  | 3.419521  | 3.026478  | H | -0.095805 | 4.299788  | 5.849787  |
| C | -4.426100 | 5.264300  | -0.708500 | H | -5.213296 | 5.153925  | -1.459187 |
| C | -3.226143 | 4.476666  | -1.105298 | H | -4.823731 | 4.935251  | 0.256879  |
| C | -2.905771 | 3.775640  | -2.243902 | H | -3.503866 | 3.644828  | -3.135762 |
| N | -2.134903 | 4.334078  | -0.275151 | H | -0.269058 | 3.279806  | -0.497714 |
| C | -1.219130 | 3.570798  | -0.924722 | H | -0.978236 | 2.367082  | -3.739692 |
| N | -1.651617 | 3.211276  | -2.125845 | H | -5.165162 | 8.494967  | 2.911171  |
| O | -0.793477 | 1.929187  | -4.598318 | H | -9.489385 | -2.626093 | -3.339365 |
| O | 0.384079  | -1.197995 | 1.851494  | H | 3.054771  | 0.530709  | -7.066090 |
| H | 3.084691  | 0.626253  | -5.278688 | H | 6.074706  | 0.528967  | -3.858179 |
| H | 1.763144  | 1.378893  | -6.178253 | H | 3.372620  | 4.128513  | -3.243117 |
| H | 1.632241  | -3.247838 | -3.470443 | H | 3.622512  | -7.420852 | 1.773452  |
| H | 0.392152  | -2.333834 | -2.610854 | H | 0.430342  | -8.468028 | 6.726119  |
| H | 1.163609  | -5.529345 | -4.332091 | H | 0.090862  | 5.983729  | 5.370213  |
| H | -1.810611 | -3.353630 | -2.128073 | H | -3.351438 | -6.086039 | 5.143666  |
| H | -0.153758 | -7.609324 | -4.066661 | H | -2.069920 | 4.770570  | 0.659138  |
| H | -3.135972 | -5.428183 | -1.862688 | H | -0.942722 | 0.989432  | -4.399939 |
| H | -2.315903 | -7.566961 | -2.833748 | H | -0.220203 | -7.214977 | 5.656873  |
| H | 0.407905  | -2.913038 | -5.620434 | H | -2.042108 | 5.225501  | 3.835086  |
| H | -3.459661 | -4.555456 | -7.651623 | H | 1.241664  | -0.501628 | -4.107015 |
| H | -3.823446 | -4.701782 | -5.925118 | H | 3.488342  | 0.625383  | -2.631957 |
| H | -3.975329 | -2.144507 | -7.609585 | H | 3.878713  | -3.632586 | 0.707882  |
| H | -5.254954 | -2.815116 | -6.585832 | C | 0.629163  | -0.007267 | 0.491847  |
| H | -3.574291 | -0.871616 | -5.578528 | C | 1.178365  | -0.019383 | 1.845579  |
| H | -4.064749 | -2.224943 | -4.552405 | H | 0.766940  | 0.753964  | 2.503223  |
| H | -1.453140 | -4.426173 | -5.783083 | H | 1.068464  | -0.620952 | -0.278603 |
| H | 1.722594  | 2.314821  | -3.781899 | C | 5.335665  | -0.497498 | 2.739410  |
| H | 1.137556  | 3.406701  | -2.542021 | C | 4.381968  | -1.122532 | 3.545349  |
| H | 3.366061  | 3.664426  | -1.553703 | C | 4.977744  | 0.282835  | 1.641242  |
| H | 5.896553  | -1.755485 | -3.776983 | C | 3.038962  | -0.963938 | 3.227385  |
| H | 4.199128  | -1.374452 | -3.592306 | H | 4.699721  | -1.710943 | 4.396352  |
| H | 3.023986  | -2.387222 | -1.294221 | C | 3.627055  | 0.430102  | 1.334449  |
| H | 8.102173  | -1.868977 | -2.159218 | H | 5.746657  | 0.753264  | 1.042245  |
| H | 9.664587  | -2.877074 | -0.523779 | C | 2.650671  | -0.198748 | 2.117244  |
| H | 6.374025  | -4.336422 | 1.858694  | H | 2.276643  | -1.426018 | 3.846477  |
| H | 8.818571  | -4.089758 | 1.462169  | H | 3.320699  | 1.034971  | 0.488716  |
| H | 6.274713  | 0.315960  | -2.130155 | H | -0.360152 | 0.395499  | 0.344425  |
| H | -2.334425 | -5.686367 | 2.902955  | H | -4.201251 | 6.333035  | -0.614256 |
| H | -3.209264 | -4.296488 | 6.878630  | H | -4.074142 | 7.634283  | 4.005002  |
| H | -1.195065 | -3.552622 | 2.399277  | H | -4.221067 | 5.112439  | 4.363651  |

H -8.162056 -1.505289 -3.008924  
H -1.394254 -3.373649 -7.211551  
H 1.571298 4.262356 4.280409  
H -4.178731 2.648457 4.888123  
H -9.599587 -3.234325 -0.899001  
C -7.499778 -2.903210 0.912465  
H -6.981114 -2.346704 1.699528  
H -8.343817 -3.426717 1.379159  
H -6.809389 -3.662867 0.529200  
C -8.879813 -0.860284 0.368274  
H -9.194132 -0.145652 -0.398483  
H -9.784734 -1.284614 0.821821  
H -8.352525 -0.297161 1.145945  
S 1.315579 -3.810190 8.175051  
H 1.656969 -6.735569 8.053196  
C 1.632816 -2.305929 7.185692  
H 0.799943 -2.096732 6.510178  
H 1.739608 -1.476546 7.887805  
H 2.558183 -2.405636 6.612522  
N 6.753242 -0.666761 3.060981  
O 7.051770 -1.398705 4.009661  
O 7.583876 -0.070316 2.372098  
O 0.995119 5.677798 2.994276  
H 0.202320 6.126414 2.606475

**Int1-S-C2-r3**

C 2.284475 0.322821 -6.302397  
C 1.356727 -0.891750 -6.277487  
O 1.131610 -1.565028 -7.286457  
N 0.796736 -1.167983 -5.063122  
C -0.190183 -2.224595 -4.868702  
C -1.596418 -1.598851 -4.768647  
O -1.780964 -0.625858 -4.018379  
C 0.125970 -3.030947 -3.584389  
C -0.814870 -4.195077 -3.354682  
C -0.560377 -5.447322 -3.934984  
C -1.967250 -4.044997 -2.570121  
C -1.434326 -6.519142 -3.740302  
C -2.842368 -5.114849 -2.371866  
C -2.580225 -6.355077 -2.958479  
N -2.610497 -2.128464 -5.483380  
C -2.586243 -3.309826 -6.372889  
C -4.074200 -3.611148 -6.598616  
C -4.735237 -2.226069 -6.519338  
C -3.955859 -1.528458 -5.398387  
C 3.528146 2.894541 -2.707471  
C 4.626295 1.886820 -3.071814  
O 5.739109 2.321463 -3.384416  
C 2.031622 2.499321 -2.480004  
C 1.669094 1.154527 -1.866707  
O 1.432947 1.136100 -0.551990  
O 1.569878 0.133859 -2.546213  
N 4.382820 0.558233 -2.955008  
C 5.437680 -0.414051 -3.204006  
C 4.929997 -1.868403 -3.245709  
C 4.883774 -2.579774 -1.923243  
C 3.775805 -3.064276 -1.269667  
C 6.021548 -2.956122 -1.116537  
C 5.517777 -3.661807 0.014460  
C 7.413377 -2.784905 -1.239797  
N 4.149275 -3.713468 -0.110479  
C 6.357409 -4.178368 1.009242  
C 8.250082 -3.296975 -0.254585

C 7.726658 -3.984399 0.860997  
C -3.265864 -4.913241 4.876114  
C -2.741734 -4.717255 3.592397  
C -2.881118 -4.026956 5.889624  
C -1.851553 -3.674350 3.315578  
C -1.993519 -2.983347 5.630458  
C -1.457684 -2.791070 4.339869  
O -0.593487 -1.771380 4.167164  
C -0.034162 -7.643330 6.097498  
C 0.661200 -6.604643 6.985812  
C 1.109744 -5.378191 6.187728  
C -9.304155 -0.933487 -2.370719  
C -8.918359 -2.406211 -2.545998  
C -7.403706 -2.691025 -2.512330  
C 2.260811 -6.934024 1.235175  
C 2.281102 -5.882251 2.155617  
C 1.554340 -6.764762 0.039494  
C 1.617717 -4.678316 1.893347  
C 0.893298 -5.571492 -0.239718  
C 0.918834 -4.500021 0.678300  
O 0.282229 -3.364152 0.360756  
C -3.415277 8.075392 3.141831  
C -2.030455 8.082281 2.484777  
C -1.377192 6.693993 2.376389  
O -2.168014 5.690355 2.355288  
O -0.122756 6.626279 2.310381  
C -3.355780 5.074063 5.519761  
C -1.878074 4.982908 5.936372  
O -1.546884 4.943255 7.128393  
C -4.088793 3.738033 5.752129  
N -1.000377 4.934342 4.904967  
C 0.455430 4.877521 5.027663  
C 1.046929 3.776370 4.138942  
C 0.623605 2.386367 4.605311  
C -3.835783 5.708483 -0.559386  
C -2.794476 4.682669 -0.861611  
C -2.481703 3.988504 -2.007692  
N -1.880987 4.254658 0.077768  
C -1.069425 3.349479 -0.519438  
N -1.401313 3.156619 -1.789597  
O -0.657529 2.024120 -4.332419  
O 0.639441 -1.474240 1.927218  
H 2.999989 0.302109 -5.476188  
H 1.686636 1.234628 -6.197370  
H 1.155003 -3.392869 -3.677718  
H 0.094213 -2.346445 -2.731356  
H 0.335305 -5.584478 -4.536185  
H -2.170505 -3.085718 -2.102857  
H -1.216390 -7.482257 -4.193180  
H -3.721573 -4.982153 -1.747937  
H -3.257235 -7.189286 -2.799259  
H -0.115095 -2.872467 -5.743043  
H -4.248598 -4.124211 -7.547683  
H -4.445933 -4.253086 -5.792508  
H -4.598185 -1.687679 -7.463767  
H -5.806909 -2.271593 -6.310382  
H -3.889567 -0.444151 -5.512356  
H -4.388967 -1.731355 -4.410916  
H -2.060323 -4.143680 -5.905322  
H 1.500475 2.485128 -3.434888  
H 1.578396 3.285471 -1.872752  
H 3.906334 3.370268 -1.795309  
H 5.605187 -2.416600 -3.915612



H 3.945235 -1.900083 -3.727241  
H 2.732154 -3.003905 -1.543500  
H 7.832997 -2.260630 -2.094064  
H 9.324950 -3.165946 -0.341305  
H 5.951618 -4.715452 1.861474  
H 8.404797 -4.370625 1.616477  
H 6.218623 -0.307183 -2.442417  
H -3.026508 -5.387467 2.784828  
H -3.274353 -4.148033 6.896066  
H -1.457047 -3.538799 2.312717  
H -1.695347 -2.298888 6.419141  
H -0.170889 -1.687012 3.233389  
H -0.021525 -6.287616 7.783724  
H 1.817256 -5.670568 5.404171  
H 0.250644 -4.896776 5.710206  
H 0.631103 -7.993767 5.300611  
H -9.317429 -2.765291 -3.504380  
H -6.932068 -2.059385 -3.281311  
H -9.017817 -0.548546 -1.387061  
H 1.521851 -7.570729 -0.689490  
H 2.819466 -5.993579 3.093597  
H 0.350494 -5.440847 -1.169597  
H 1.618832 -3.870674 2.618321  
H 0.474884 -2.557246 1.029233  
H -2.104705 8.479884 1.462219  
H -1.338809 8.745716 3.014878  
H -4.083928 7.387184 2.621139  
H -3.992521 3.421238 6.795001  
H -5.153905 3.833571 5.519039  
H -3.810582 5.855577 6.138072  
H 1.052112 1.613402 3.965542  
H 0.965710 2.206297 5.629989  
H -0.465675 2.291416 4.581086  
H 0.699799 4.699008 6.077503  
H -4.487424 5.845280 -1.426532  
H -4.458111 5.417153 0.293076  
H -2.967197 4.040490 -2.972963  
H -0.257729 2.863738 0.001597  
H -0.834415 2.377513 -3.432073  
H -3.861515 9.076388 3.125409  
H -10.385930 -0.796779 -2.473360  
H 2.814177 0.341906 -7.254601  
H 5.911444 -0.165499 -4.161060  
H 3.551028 3.668207 -3.478378  
H 2.780813 -7.863215 1.446251  
H -0.344039 -8.515211 6.682895  
H 0.878804 5.845962 4.733056  
H -3.958069 -5.724954 5.076733  
H -1.830118 4.628389 1.046167  
H -0.963701 1.102890 -4.267861  
H -0.926873 -7.220157 5.624596  
H -1.376935 4.987393 3.957966  
H 0.950111 -0.525647 -4.290051  
H 3.440060 0.214326 -2.830957  
H 3.507515 -4.150755 0.539022  
C 1.013773 -0.164533 -0.011689  
C 1.097013 -0.221188 1.529865  
H 0.459587 0.589563 1.926952  
H 1.651168 -0.937823 -0.439916  
C 5.160349 0.572117 2.754621  
C 4.709314 -0.747224 2.687996  
C 4.325737 1.649402 2.448303  
C 3.392627 -0.981898 2.306655

H 5.384718 -1.559164 2.925820  
C 3.013790 1.393522 2.063906  
H 4.706380 2.660302 2.520009  
C 2.531946 0.075123 1.983185  
H 3.007433 -1.992372 2.253398  
H 2.351958 2.227183 1.849313  
H -0.017190 -0.339954 -0.327206  
H -3.391294 6.679267 -0.313893  
H -3.355058 7.754329 4.185516  
H -3.438522 5.370379 4.471765  
H -8.817481 -0.305604 -3.126197  
H -2.080198 -3.061774 -7.314466  
H 2.144796 3.858004 4.223594  
H -3.674005 2.948384 5.117429  
O 0.652757 3.937780 2.775265  
H 0.493974 4.892554 2.575929  
H -9.409225 -3.009586 -1.768454  
C -7.123220 -4.157043 -2.873653  
H -6.047386 -4.361936 -2.901214  
H -7.570707 -4.833715 -2.134805  
H -7.539977 -4.414108 -3.854150  
C -6.769154 -2.337369 -1.159134  
H -6.892277 -1.279296 -0.909501  
H -7.222293 -2.926726 -0.352003  
H -5.694782 -2.550663 -1.162303  
H 1.529495 -7.059216 7.478931  
C 2.322271 -2.842482 6.055138  
H 2.793683 -2.023414 6.602622  
H 3.025762 -3.215894 5.306352  
H 1.418257 -2.473382 5.564187  
S 1.928315 -4.143859 7.280379  
N 6.536817 0.833398 3.164268  
O 7.254787 -0.128752 3.456534  
O 6.925520 2.005683 3.202293

**TS2-S-C2-r3**

C 2.370388 0.008310 -6.279395  
C 1.333245 -1.120786 -6.233385  
O 0.927483 -1.666293 -7.266377  
N 0.908961 -1.466246 -4.989319  
C -0.084477 -2.505104 -4.754281  
C -1.498306 -1.900368 -4.688624  
O -1.716812 -0.900626 -3.978869  
C 0.229449 -3.263289 -3.440691  
C -0.683232 -4.448671 -3.203543  
C -0.377993 -5.705973 -3.746948  
C -1.860245 -4.315023 -2.453312  
C -1.227172 -6.797310 -3.552679  
C -2.711509 -5.404054 -2.255949  
C -2.399455 -6.648628 -2.807828  
N -2.493480 -2.486650 -5.390164  
C -2.436405 -3.709007 -6.237711  
C -3.915556 -4.040810 -6.473994  
C -4.602622 -2.666814 -6.448231  
C -3.855016 -1.921653 -5.336967  
C 3.510170 2.784192 -2.803896  
C 4.663559 1.799920 -3.088443  
O 5.751904 2.239204 -3.482986  
C 2.021970 2.392775 -3.035984  
C 1.410798 1.099160 -2.437162  
O 1.229705 1.213179 -1.036450  
O 1.820545 -0.035938 -2.855940  
N 4.464783 0.490186 -2.801947

|   |           |           |           |   |            |           |           |
|---|-----------|-----------|-----------|---|------------|-----------|-----------|
| C | 5.483404  | -0.511403 | -3.097500 | H | -4.288416  | -4.663698 | -5.653676 |
| C | 4.978239  | -1.955599 | -2.929035 | H | -4.459510  | -2.154490 | -7.406234 |
| C | 4.970130  | -2.489410 | -1.524196 | H | -5.676723  | -2.726250 | -6.255278 |
| C | 3.879134  | -2.885649 | -0.786317 | H | -3.816142  | -0.839259 | -5.478247 |
| C | 6.126677  | -2.750066 | -0.698682 | H | -4.296729  | -2.111047 | -4.350326 |
| C | 5.650108  | -3.297829 | 0.529340  | H | -1.905350  | -4.514138 | -5.729003 |
| C | 7.514901  | -2.593145 | -0.872291 | H | 1.848053   | 2.295924  | -4.110345 |
| N | 4.279986  | -3.366200 | 0.442672  | H | 1.415961   | 3.239020  | -2.698141 |
| C | 6.513936  | -3.670425 | 1.566591  | H | 3.639548   | 3.096941  | -1.758796 |
| C | 8.375325  | -2.964523 | 0.155144  | H | 5.634247   | -2.586796 | -3.543990 |
| C | 7.879070  | -3.494542 | 1.364871  | H | 3.978226   | -2.042869 | -3.369618 |
| C | -3.276167 | -4.740259 | 5.067385  | H | 2.826843   | -2.870194 | -1.031945 |
| C | -2.678287 | -4.649186 | 3.804692  | H | 7.914063   | -2.188455 | -1.798418 |
| C | -3.091275 | -3.688954 | 5.972150  | H | 9.447538   | -2.843059 | 0.028374  |
| C | -1.907836 | -3.540000 | 3.440885  | H | 6.129358   | -4.081955 | 2.495166  |
| C | -2.328150 | -2.574892 | 5.624499  | H | 8.574529   | -3.770844 | 2.152315  |
| C | -1.727750 | -2.489307 | 4.355899  | H | 6.359253   | -0.342238 | -2.460405 |
| O | -0.989964 | -1.380326 | 4.092405  | H | -2.807495  | -5.453918 | 3.085621  |
| C | -0.019718 | -7.345930 | 6.479892  | H | -3.546278  | -3.732253 | 6.958248  |
| C | 0.398369  | -6.248373 | 7.464748  | H | -1.440330  | -3.487000 | 2.460679  |
| C | 0.770049  | -4.947546 | 6.749352  | H | -2.187169  | -1.754648 | 6.321767  |
| C | -9.259403 | -1.248594 | -2.470900 | H | -0.655015  | -1.337765 | 3.159536  |
| C | -8.874576 | -2.728982 | -2.376317 | H | -0.420606  | -6.053650 | 8.168188  |
| C | -7.366121 | -3.019756 | -2.508240 | H | 1.611287   | -5.112083 | 6.066997  |
| C | 2.343705  | -6.848292 | 1.624109  | H | -0.076488  | -4.573468 | 6.164981  |
| C | 2.290214  | -5.762490 | 2.504974  | H | 0.786857   | -7.575602 | 5.775017  |
| C | 1.764161  | -6.696639 | 0.356946  | H | -9.404969  | -3.283732 | -3.162134 |
| C | 1.682154  | -4.556102 | 2.141820  | H | -7.024928  | -2.572169 | -3.454879 |
| C | 1.158798  | -5.504554 | -0.021653 | H | -8.832512  | -0.660988 | -1.652293 |
| C | 1.088929  | -4.376105 | 0.853273  | H | 1.789487   | -7.524652 | -0.349822 |
| O | 0.522781  | -3.266796 | 0.463639  | H | 2.728996   | -5.852103 | 3.497666  |
| C | -3.616285 | 8.136495  | 2.657911  | H | 0.714340   | -5.402581 | -1.006614 |
| C | -2.172150 | 8.274266  | 2.178615  | H | 1.636910   | -3.732940 | 2.850849  |
| C | -1.442545 | 6.931965  | 2.058943  | H | 0.379862   | -1.980765 | 1.192221  |
| O | -2.183967 | 5.889690  | 2.017435  | H | -2.140937  | 8.749030  | 1.187730  |
| O | -0.187677 | 6.932507  | 2.006658  | H | -1.587393  | 8.924731  | 2.838364  |
| C | -3.545677 | 5.263722  | 5.189386  | H | -4.180190  | 7.470448  | 2.002496  |
| C | -2.066847 | 5.205693  | 5.610928  | H | -4.215854  | 4.161176  | 6.938536  |
| O | -1.744461 | 5.295066  | 6.802569  | H | -5.419219  | 4.231745  | 5.634475  |
| C | -4.351602 | 4.133185  | 5.854008  | H | -3.929387  | 6.232215  | 5.530840  |
| N | -1.175615 | 5.036904  | 4.603370  | H | 1.345483   | 2.044111  | 3.485538  |
| C | 0.275956  | 5.109604  | 4.768285  | H | 1.191179   | 2.487577  | 5.193279  |
| C | 1.008354  | 4.152606  | 3.813529  | H | -0.252548  | 2.423995  | 4.158716  |
| C | 0.809073  | 2.687630  | 4.186890  | H | 0.514673   | 4.873432  | 5.808042  |
| C | -3.934988 | 5.574282  | -0.921393 | H | -4.588752  | 5.551577  | -1.796594 |
| C | -2.879711 | 4.524730  | -1.042381 | H | -4.551323  | 5.423954  | -0.029131 |
| C | -2.589770 | 3.622283  | -2.036207 | H | -3.094651  | 3.459894  | -2.977091 |
| N | -1.927267 | 4.316028  | -0.065141 | H | -0.251397  | 2.990656  | 0.084416  |
| C | -1.107038 | 3.334709  | -0.474907 | H | -0.810488  | 1.978382  | -2.396974 |
| N | -1.482384 | 2.885041  | -1.669213 | H | -4.117674  | 9.111420  | 2.677724  |
| O | -0.159514 | 1.293191  | -3.048611 | H | -10.346643 | -1.122759 | -2.431956 |
| O | 0.107190  | -1.069528 | 1.617749  | H | 3.193291   | -0.302061 | -6.928309 |
| H | 2.751302  | 0.268294  | -5.291767 | H | 5.830809   | -0.369141 | -4.130047 |
| H | 1.908534  | 0.891557  | -6.732166 | H | 3.719196   | 3.666127  | -3.413495 |
| H | 1.269337  | -3.599447 | -3.503244 | H | 2.820331   | -7.779627 | 1.915108  |
| H | 0.165137  | -2.564257 | -2.602160 | H | -0.276808  | -8.269813 | 7.008215  |
| H | 0.537843  | -5.830865 | -4.319745 | H | 0.612189   | 6.136204  | 4.569650  |
| H | -2.100938 | -3.352765 | -2.010329 | H | -3.873376  | -5.606071 | 5.335596  |
| H | -0.969319 | -7.763796 | -3.976524 | H | -1.878213  | 4.853963  | 0.839576  |
| H | -3.611216 | -5.282541 | -1.659439 | H | -0.565617  | 0.415714  | -3.231643 |
| H | -3.057783 | -7.497838 | -2.649312 | H | -0.893234  | -7.037009 | 5.895813  |
| H | -0.017458 | -3.195361 | -5.597629 | H | -1.520131  | 5.083280  | 3.643973  |
| H | -4.066897 | -4.586290 | -7.408853 | H | 1.237436   | -0.913850 | -4.183427 |

|                     |           |           |           |   |           |           |           |
|---------------------|-----------|-----------|-----------|---|-----------|-----------|-----------|
| H                   | 3.496483  | 0.160900  | -2.700872 | C | -4.571301 | -2.583332 | -6.505483 |
| H                   | 3.648124  | -3.762394 | 1.130606  | C | -3.827327 | -1.845697 | -5.386592 |
| C                   | 0.775513  | -0.011601 | -0.418762 | C | 3.548876  | 2.776105  | -2.769494 |
| C                   | 0.890595  | 0.005250  | 1.118046  | C | 4.705449  | 1.786731  | -3.034723 |
| H                   | 0.427722  | 0.930888  | 1.489436  | O | 5.812887  | 2.228069  | -3.378324 |
| H                   | 1.337705  | -0.854087 | -0.820904 | C | 2.071008  | 2.403639  | -3.069104 |
| C                   | 4.879955  | -0.100940 | 2.774467  | C | 1.371680  | 1.115682  | -2.524057 |
| C                   | 3.822428  | -0.685168 | 3.472236  | O | 1.259519  | 1.236955  | -1.052658 |
| C                   | 4.685477  | 0.520399  | 1.541610  | O | 1.880475  | -0.036740 | -2.891795 |
| C                   | 2.550542  | -0.647388 | 2.913248  | N | 4.479757  | 0.474287  | -2.793820 |
| H                   | 4.004692  | -1.154414 | 4.430562  | C | 5.502903  | -0.529804 | -3.075393 |
| C                   | 3.404667  | 0.551577  | 0.998442  | C | 4.972476  | -1.972973 | -2.976975 |
| H                   | 5.526544  | 0.960256  | 1.021349  | C | 4.951668  | -2.569615 | -1.597707 |
| C                   | 2.319512  | -0.035809 | 1.669084  | C | 3.853493  | -2.931751 | -0.853186 |
| H                   | 1.717412  | -1.095302 | 3.440969  | C | 6.105575  | -2.930705 | -0.807724 |
| H                   | 3.247368  | 1.028865  | 0.040367  | C | 5.621533  | -3.502646 | 0.406243  |
| H                   | -0.284233 | -0.158393 | -0.655635 | C | 7.496624  | -2.846077 | -1.005537 |
| H                   | -3.497536 | 6.575576  | -0.848382 | N | 4.248301  | -3.485371 | 0.347289  |
| H                   | -3.658284 | 7.719188  | 3.666675  | C | 6.482603  | -3.972758 | 1.405496  |
| H                   | -3.641099 | 5.234056  | 4.101271  | C | 8.354137  | -3.313455 | -0.015411 |
| H                   | -8.908348 | -0.809270 | -3.412074 | C | 7.851498  | -3.868948 | 1.180302  |
| H                   | -1.916664 | -3.483215 | -7.176657 | C | -3.305685 | -4.749380 | 5.041395  |
| H                   | 1.250519  | -6.592066 | 8.064157  | C | -2.702599 | -4.665737 | 3.780354  |
| S                   | 1.251156  | -3.652242 | 7.965377  | C | -3.124043 | -3.691789 | 5.939605  |
| C                   | 1.647765  | -2.277469 | 6.826793  | C | -1.931017 | -3.558635 | 3.411581  |
| H                   | 1.933963  | -1.422735 | 7.443172  | C | -2.359995 | -2.579697 | 5.587131  |
| H                   | 2.486390  | -2.543879 | 6.178227  | C | -1.754943 | -2.501653 | 4.320107  |
| H                   | 0.781828  | -2.006972 | 6.218308  | O | -1.017307 | -1.393064 | 4.053058  |
| H                   | 2.082791  | 4.392161  | 3.908612  | C | -0.069101 | -7.382383 | 6.448977  |
| O                   | 0.586318  | 4.318883  | 2.463847  | C | 0.366183  | -6.286591 | 7.428397  |
| H                   | -9.231689 | -3.140679 | -1.421139 | C | 0.733109  | -4.986986 | 6.708262  |
| C                   | -7.114003 | -4.532547 | -2.587671 | C | -9.245889 | -1.180602 | -2.494699 |
| H                   | -7.662351 | -4.986976 | -3.420618 | C | -8.859239 | -2.655156 | -2.652206 |
| H                   | -6.049661 | -4.752206 | -2.726174 | C | -7.345545 | -2.941510 | -2.594007 |
| H                   | -7.437858 | -5.030627 | -1.665249 | C | 2.311202  | -6.872933 | 1.602702  |
| C                   | -6.545517 | -2.395621 | -1.369788 | C | 2.283555  | -5.779153 | 2.475257  |
| H                   | -6.650145 | -1.307115 | -1.333441 | C | 1.696328  | -6.730636 | 0.350937  |
| H                   | -6.862980 | -2.794798 | -0.398247 | C | 1.667675  | -4.574573 | 2.118790  |
| H                   | -5.479472 | -2.618758 | -1.486625 | C | 1.082292  | -5.540951 | -0.020833 |
| H                   | -4.021839 | 3.152650  | 5.495280  | C | 1.038637  | -4.403214 | 0.845180  |
| N                   | 6.221611  | -0.142300 | 3.350376  | O | 0.463115  | -3.297837 | 0.463350  |
| O                   | 6.382085  | -0.747053 | 4.415669  | C | -3.560698 | 8.142098  | 2.700999  |
| O                   | 7.134963  | 0.431316  | 2.750133  | C | -2.083550 | 8.291700  | 2.343687  |
| H                   | 0.417311  | 5.275671  | 2.274251  | C | -1.373051 | 6.955022  | 2.119947  |
| <b>Int2-S-C2-r3</b> |           |           |           | O | -2.132591 | 5.924407  | 2.027672  |
| C                   | 2.402216  | 0.026007  | -6.263302 | O | -0.122166 | 6.939082  | 2.042265  |
| C                   | 1.339018  | -1.081249 | -6.220767 | C | -3.514793 | 5.255209  | 5.216997  |
| O                   | 0.896252  | -1.587062 | -7.260619 | C | -2.038219 | 5.194775  | 5.643429  |
| N                   | 0.941795  | -1.456239 | -4.977454 | O | -1.718066 | 5.282240  | 6.835161  |
| C                   | -0.072326 | -2.480604 | -4.758867 | C | -4.322103 | 4.118692  | 5.869202  |
| C                   | -1.476973 | -1.854912 | -4.712781 | N | -1.144489 | 5.024308  | 4.638056  |
| O                   | -1.684093 | -0.843950 | -4.017169 | C | 0.307095  | 5.080200  | 4.805898  |
| C                   | 0.213535  | -3.242715 | -3.440985 | C | 1.025886  | 4.123530  | 3.838838  |
| C                   | -0.705150 | -4.427062 | -3.223684 | C | 0.814761  | 2.657507  | 4.199429  |
| C                   | -0.393494 | -5.682203 | -3.768651 | C | -3.884601 | 5.601296  | -0.893100 |
| C                   | -1.893200 | -4.296235 | -2.490604 | C | -2.802074 | 4.577790  | -0.996881 |
| C                   | -1.246668 | -6.773535 | -3.593084 | C | -2.493759 | 3.684134  | -1.988310 |
| C                   | -2.748619 | -5.385275 | -2.311671 | N | -1.852526 | 4.395210  | -0.006744 |
| C                   | -2.429938 | -6.627410 | -2.865246 | C | -1.002647 | 3.440092  | -0.384890 |
| N                   | -2.476116 | -2.434899 | -5.416000 | N | -1.373746 | 2.988390  | -1.584355 |
| C                   | -2.427195 | -3.662101 | -6.255514 | O | -0.004027 | 1.267614  | -3.037529 |
| C                   | -3.907905 | -3.969195 | -6.514419 | O | 0.094551  | -1.058745 | 1.579544  |
|                     |           |           |           | H | 2.764832  | 0.292381  | -5.270746 |

H 1.969289 0.909134 -6.743698  
H 1.253489 -3.581656 -3.484735  
H 0.136951 -2.545403 -2.602149  
H 0.530853 -5.805230 -4.327993  
H -2.139176 -3.336164 -2.045677  
H -0.983418 -7.738134 -4.017972  
H -3.656737 -5.265988 -1.727478  
H -3.091522 -7.476648 -2.720913  
H -0.006205 -3.174016 -5.600215  
H -4.053973 -4.516109 -7.449334  
H -4.305186 -4.581841 -5.697801  
H -4.404791 -2.078246 -7.463600  
H -5.649125 -2.623197 -6.328812  
H -3.766886 -0.764914 -5.533239  
H -4.288705 -2.021117 -4.406138  
H -1.918568 -4.473818 -5.734543  
H 1.944439 2.323690 -4.153332  
H 1.466160 3.263296 -2.758365  
H 3.639512 3.058220 -1.711308  
H 5.619528 -2.589341 -3.615857  
H 3.973178 -2.021834 -3.423746  
H 2.799770 -2.843067 -1.075860  
H 7.899473 -2.421802 -1.921401  
H 9.428976 -3.248764 -0.160764  
H 6.092657 -4.404045 2.322846  
H 8.545008 -4.222223 1.938250  
H 6.352436 -0.394942 -2.394921  
H -2.828309 -5.475290 3.066059  
H -3.582241 -3.728466 6.924521  
H -1.458916 -3.512055 2.433034  
H -2.221782 -1.755003 6.279744  
H -0.677179 -1.351842 3.122167  
H -0.442388 -6.089035 8.143021  
H 1.563800 -5.154676 6.013927  
H -0.119830 -4.609012 6.135844  
H 0.727292 -7.614737 5.733538  
H -9.244815 -3.021619 -3.613262  
H -6.861709 -2.316801 -3.361104  
H -8.971887 -0.787801 -1.510632  
H 1.701068 -7.564518 -0.349455  
H 2.750036 -5.860781 3.456049  
H 0.611772 -5.446274 -0.994419  
H 1.646004 -3.744315 2.820733  
H 0.357153 -1.970242 1.163315  
H -1.964841 8.879083 1.422819  
H -1.535322 8.842211 3.116697  
H -4.093251 7.580775 1.930661  
H -4.192277 4.139335 6.954585  
H -5.388616 4.217311 5.644700  
H -3.901075 6.220565 5.564099  
H 1.341512 2.015015 3.489873  
H 1.200421 2.445641 5.201872  
H -0.249328 2.403713 4.175180  
H 0.542579 4.829452 5.842837  
H -4.529925 5.554712 -1.772767  
H -4.500141 5.439372 -0.003091  
H -2.973068 3.493245 -2.934933  
H -0.143320 3.104527 0.173440  
H -0.859245 2.248028 -2.142675  
H -4.038000 9.123755 2.804616  
H -10.326071 -1.043699 -2.612623  
H 3.232570 -0.313605 -6.888549  
H 5.898693 -0.357939 -4.086068

H 3.794094 3.672393 -3.344672  
H 2.794729 -7.802438 1.888124  
H -0.322707 -8.305413 6.980475  
H 0.656090 6.104795 4.618968  
H -3.903412 -5.613752 5.312989  
H -1.829549 4.955177 0.911860  
H -0.374823 0.386581 -3.255427  
H -0.948977 -7.069956 5.876427  
H -1.485534 5.066312 3.679080  
H 1.288541 -0.914109 -4.157534  
H 3.487457 0.161624 -2.732353  
H 3.607848 -3.869503 1.034684  
C 0.763194 0.030605 -0.454794  
C 0.895471 0.007429 1.081564  
H 0.455119 0.934329 1.477743  
H 1.285745 -0.829897 -0.877356  
C 4.888835 -0.169591 2.718952  
C 3.819699 -0.708614 3.436129  
C 4.705794 0.416983 1.467112  
C 2.547229 -0.654148 2.880368  
H 3.994380 -1.154280 4.407049  
C 3.423988 0.466605 0.927165  
H 5.556200 0.818157 0.930876  
C 2.326436 -0.068150 1.621554  
H 1.705139 -1.067875 3.422133  
H 3.269643 0.916158 -0.045114  
H -0.307340 -0.085216 -0.672009  
H -3.468599 6.611306 -0.824171  
H -3.686997 7.607623 3.644361  
H -3.607039 5.231808 4.128313  
H -8.748699 -0.559727 -3.249190  
H -1.888332 -3.450791 -7.187164  
H 2.102534 4.352788 3.925060  
O 0.593030 4.305768 2.492531  
H 0.465065 5.267816 2.303269  
H 1.225142 -6.633654 8.016016  
C 1.626715 -2.321597 6.775104  
H 0.754585 -2.045918 6.177930  
H 1.925660 -1.468819 7.388167  
H 2.455302 -2.592415 6.115620  
S 1.236752 -3.694502 7.918265  
H -3.988741 3.141353 5.505310  
H -9.362105 -3.251459 -1.876929  
C -7.061525 -4.410766 -2.938968  
H -5.985661 -4.617178 -2.948070  
H -7.521231 -5.080729 -2.201547  
H -7.463476 -4.675346 -3.923595  
C -6.730342 -2.577917 -1.234437  
H -6.855364 -1.517669 -0.994784  
H -7.196355 -3.160061 -0.429435  
H -5.656480 -2.793184 -1.219861  
N 6.229129 -0.219294 3.296600  
O 6.375535 -0.779394 4.388370  
O 7.156758 0.303869 2.672202

**TS3-S-C2-r3**

C 2.527000 -0.231300 -6.179500  
C 1.483089 -1.355003 -6.121059  
O 1.056146 -1.893330 -7.149393  
N 1.074404 -1.704373 -4.872336  
C 0.027000 -2.686800 -4.633500  
C -1.361974 -2.025388 -4.692363  
O -1.565106 -0.947466 -4.102906

|   |           |           |           |   |           |           |           |
|---|-----------|-----------|-----------|---|-----------|-----------|-----------|
| C | 0.245545  | -3.367428 | -3.258870 | C | 0.260744  | 3.085970  | 3.256560  |
| C | -0.720230 | -4.500484 | -2.982769 | C | -3.860800 | 5.520700  | -1.124000 |
| C | -0.474679 | -5.789237 | -3.481265 | C | -2.596313 | 4.726194  | -0.960198 |
| C | -1.885039 | -4.288192 | -2.232858 | C | -2.134160 | 3.586394  | -1.575869 |
| C | -1.370877 | -6.834035 | -3.246082 | N | -1.610600 | 5.080173  | -0.053360 |
| C | -2.783196 | -5.330316 | -1.993651 | C | -0.612407 | 4.191344  | -0.119880 |
| C | -2.531282 | -6.606483 | -2.502720 | N | -0.899790 | 3.271396  | -1.036074 |
| N | -2.354397 | -2.646701 | -5.367736 | O | 0.100455  | 1.283979  | -3.505904 |
| C | -2.299300 | -3.923100 | -6.130500 | O | -0.326774 | -1.173503 | 1.242629  |
| C | -3.774386 | -4.212018 | -6.437998 | H | 2.952276  | -0.001307 | -5.203118 |
| C | -4.401762 | -2.813339 | -6.543604 | H | 2.048113  | 0.667587  | -6.581233 |
| C | -3.690002 | -2.024905 | -5.438751 | H | 1.273313  | -3.744783 | -3.250452 |
| C | 3.607700  | 2.641100  | -2.764100 | H | 0.174213  | -2.619027 | -2.465634 |
| C | 4.750278  | 1.638388  | -3.032030 | H | 0.432125  | -5.975993 | -4.051835 |
| O | 5.837447  | 2.050436  | -3.459437 | H | -2.078527 | -3.301757 | -1.821206 |
| C | 2.152924  | 2.404204  | -3.245744 | H | -1.158494 | -7.825548 | -3.636098 |
| C | 1.332516  | 1.145232  | -2.893560 | H | -3.673001 | -5.148088 | -1.397673 |
| O | 0.846211  | 1.405146  | -1.143225 | H | -3.226462 | -7.418842 | -2.311460 |
| O | 1.881333  | -0.003082 | -2.911682 | H | 0.108203  | -3.434525 | -5.425601 |
| N | 4.546545  | 0.346009  | -2.677122 | H | -3.892352 | -4.811109 | -7.344462 |
| C | 5.569200  | -0.670900 | -2.918100 | H | -4.223570 | -4.765069 | -5.605795 |
| C | 5.080237  | -2.097796 | -2.624124 | H | -4.178846 | -2.372892 | -7.521836 |
| C | 5.016680  | -2.483611 | -1.173686 | H | -5.487090 | -2.817427 | -6.415197 |
| C | 3.894877  | -2.823441 | -0.455245 | H | -3.593025 | -0.957424 | -5.648206 |
| C | 6.133557  | -2.629929 | -0.269296 | H | -4.199547 | -2.128144 | -4.472056 |
| C | 5.603032  | -3.057311 | 0.984719  | H | -1.833455 | -4.713917 | -5.542095 |
| C | 7.525903  | -2.462618 | -0.389534 | H | 2.149461  | 2.398917  | -4.342930 |
| N | 4.240040  | -3.160580 | 0.837320  | H | 1.567217  | 3.281340  | -2.953797 |
| C | 6.418867  | -3.303456 | 2.095679  | H | 3.594349  | 2.803070  | -1.677635 |
| C | 8.339020  | -2.709196 | 0.711742  | H | 5.770480  | -2.775218 | -3.145918 |
| C | 7.790022  | -3.121849 | 1.943878  | H | 4.100460  | -2.247449 | -3.093774 |
| C | -3.383700 | -4.614700 | 5.179600  | H | 2.854034  | -2.856035 | -0.747201 |
| C | -2.685072 | -4.691274 | 3.969345  | H | 7.964759  | -2.146752 | -1.332206 |
| C | -3.479208 | -3.374642 | 5.821621  | H | 9.414335  | -2.579246 | 0.625689  |
| C | -2.088140 | -3.561529 | 3.403059  | H | 5.994301  | -3.621406 | 3.043458  |
| C | -2.889124 | -2.238427 | 5.268942  | H | 8.448383  | -3.301043 | 2.789226  |
| C | -2.186469 | -2.319671 | 4.053136  | H | 6.453857  | -0.441623 | -2.313014 |
| O | -1.637127 | -1.179189 | 3.572889  | H | -2.598950 | -5.643447 | 3.452440  |
| C | -0.171700 | -7.192500 | 6.737700  | H | -4.020706 | -3.287805 | 6.759973  |
| C | -0.284948 | -6.343922 | 8.009115  | H | -1.544718 | -3.636055 | 2.465155  |
| C | -0.119134 | -4.851960 | 7.712892  | H | -2.966470 | -1.272454 | 5.758960  |
| C | -9.187300 | -1.320100 | -2.584300 | H | -1.191324 | -1.294525 | 2.688372  |
| C | -8.799603 | -2.795541 | -2.730235 | H | -1.261415 | -6.514068 | 8.479307  |
| C | -7.288425 | -3.084708 | -2.633683 | H | 0.871294  | -4.652102 | 7.289733  |
| C | 2.296600  | -6.850200 | 1.920700  | H | -0.872615 | -4.520568 | 6.991401  |
| C | 2.052723  | -5.740018 | 2.738017  | H | 0.805172  | -7.063561 | 6.258771  |
| C | 1.965276  | -6.746469 | 0.562071  | H | -9.161838 | -3.162611 | -3.700092 |
| C | 1.502005  | -4.559784 | 2.227224  | H | -6.783936 | -2.462112 | -3.389068 |
| C | 1.419804  | -5.580877 | 0.036738  | H | -8.936753 | -0.926675 | -1.594306 |
| C | 1.159751  | -4.426997 | 0.843545  | H | 2.140655  | -7.592793 | -0.100699 |
| O | 0.668090  | -3.340447 | 0.318151  | H | 2.294885  | -5.789162 | 3.798827  |
| C | -3.604300 | 8.186400  | 2.384000  | H | 1.166977  | -5.522222 | -1.017878 |
| C | -2.217319 | 8.756671  | 2.693931  | H | 1.308722  | -3.717718 | 2.888251  |
| C | -1.094377 | 8.042197  | 1.931270  | H | 0.162348  | -2.024937 | 0.932674  |
| O | -1.167752 | 6.737603  | 1.972394  | H | -2.167633 | 9.826699  | 2.471388  |
| O | -0.210993 | 8.686376  | 1.360718  | H | -2.006959 | 8.638207  | 3.766038  |
| C | -3.602600 | 5.389600  | 5.000200  | H | -3.870310 | 8.352392  | 1.333501  |
| C | -2.144038 | 5.076802  | 5.381452  | H | -4.412743 | 4.256504  | 6.662620  |
| O | -1.870435 | 4.567224  | 6.474237  | H | -5.603343 | 4.619630  | 5.392706  |
| C | -4.562000 | 4.343400  | 5.584400  | H | -3.842795 | 6.384173  | 5.397465  |
| N | -1.207357 | 5.403916  | 4.455214  | H | 0.827666  | 2.549785  | 2.493133  |
| C | 0.226300  | 5.205200  | 4.665400  | H | 0.228208  | 2.463407  | 4.157308  |
| C | 0.927871  | 4.430399  | 3.542936  | H | -0.765398 | 3.224517  | 2.902756  |

|   |            |           |           |                     |           |           |           |
|---|------------|-----------|-----------|---------------------|-----------|-----------|-----------|
| H | 0.332350   | 4.663760  | 5.608164  | O                   | 6.468322  | 0.640032  | 2.995941  |
| H | -4.504603  | 5.048716  | -1.868890 |                     |           |           |           |
| H | -4.413875  | 5.581389  | -0.181143 | <b>Prod-S-C2-r3</b> |           |           |           |
| H | -2.583521  | 2.984170  | -2.349233 | C                   | 2.141592  | 0.298605  | -6.406995 |
| H | 0.273443   | 4.233644  | 0.499862  | C                   | 1.121889  | -0.841877 | -6.390628 |
| H | -0.201990  | 2.404121  | -1.192524 | O                   | 0.565834  | -1.231235 | -7.420160 |
| H | -4.377662  | 8.660144  | 2.998219  | N                   | 0.840273  | -1.391919 | -5.168570 |
| H | -10.264002 | -1.181348 | -2.728880 | C                   | -0.313455 | -2.277689 | -4.990778 |
| H | 3.315691   | -0.525057 | -6.876452 | C                   | -1.607414 | -1.454010 | -5.154326 |
| H | 5.895477   | -0.610974 | -3.965729 | O                   | -1.677921 | -0.309477 | -4.663572 |
| H | 3.946066   | 3.578718  | -3.210552 | C                   | -0.235723 | -2.910903 | -3.579768 |
| H | 2.726435   | -7.760810 | 2.327162  | C                   | -1.341348 | -3.899312 | -3.275346 |
| H | -0.295375  | -8.256547 | 6.963769  | C                   | -1.241918 | -5.236776 | -3.688574 |
| H | 0.724744   | 6.177414  | 4.778937  | C                   | -2.488472 | -3.500631 | -2.576208 |
| H | -3.846849  | -5.498124 | 5.607676  | C                   | -2.264546 | -6.148431 | -3.419156 |
| H | -1.586072  | 5.860001  | 0.648660  | C                   | -3.512469 | -4.409828 | -2.302538 |
| H | -0.326790  | 0.402729  | -3.589446 | C                   | -3.405303 | -5.736255 | -2.726369 |
| H | -0.937996  | -6.911121 | 6.007784  | N                   | -2.655381 | -1.999070 | -5.803169 |
| H | -1.478414  | 5.886438  | 3.593562  | C                   | -2.737846 | -3.322372 | -6.477938 |
| H | 1.373967   | -1.116335 | -4.078628 | C                   | -4.234270 | -3.464695 | -6.781863 |
| H | 3.564257   | 0.054414  | -2.578262 | C                   | -4.693865 | -2.016416 | -7.010347 |
| H | 3.583641   | -3.527699 | 1.516264  | C                   | -3.901240 | -1.223791 | -5.964340 |
| C | 0.365296   | 0.168866  | -0.641307 | C                   | 3.453990  | 2.781786  | -2.774499 |
| C | 0.384499   | 0.016713  | 0.897800  | C                   | 4.299769  | 1.724338  | -3.495248 |
| H | -0.196499  | 0.843864  | 1.328824  | O                   | 4.639459  | 1.901708  | -4.670820 |
| H | 0.961688   | -0.644291 | -1.070958 | C                   | 2.062072  | 2.934632  | -3.421102 |
| C | 4.223215   | 0.079727  | 2.870406  | C                   | 1.234489  | 1.661027  | -3.479372 |
| C | 3.112689   | -0.456378 | 3.526280  | O                   | 1.060663  | 1.418750  | -0.034960 |
| C | 4.128648   | 0.601966  | 1.581722  | O                   | 1.615033  | 0.567226  | -3.082781 |
| C | 1.891141   | -0.470440 | 2.866299  | N                   | 4.648167  | 0.618228  | -2.782090 |
| H | 3.218311   | -0.847871 | 4.529899  | C                   | 5.346999  | -0.517696 | -3.383000 |
| C | 2.895155   | 0.581331  | 0.935606  | C                   | 4.599992  | -1.863403 | -3.296646 |
| H | 5.009567   | 1.003262  | 1.097377  | C                   | 4.720390  | -2.580115 | -1.981704 |
| C | 1.761419   | 0.041571  | 1.561802  | C                   | 3.705324  | -2.904461 | -1.111513 |
| H | 1.018356   | -0.877918 | 3.363593  | C                   | 5.929991  | -3.128109 | -1.410807 |
| H | 2.799378   | 0.988556  | -0.062320 | C                   | 5.563930  | -3.764098 | -0.187712 |
| H | -0.681905  | -0.003813 | -0.939263 | C                   | 7.278178  | -3.169470 | -1.813661 |
| H | -3.647435  | 6.542931  | -1.453421 | N                   | 4.207087  | -3.604009 | -0.033692 |
| H | -3.631155  | 7.111793  | 2.565104  | C                   | 6.499253  | -4.415429 | 0.625346  |
| H | -3.704275  | 5.447802  | 3.912819  | C                   | 8.209401  | -3.817572 | -1.009201 |
| H | -8.670534  | -0.701150 | -3.327118 | C                   | 7.823782  | -4.432323 | 0.200540  |
| H | -1.716188  | -3.778025 | -7.048127 | C                   | -3.223299 | -5.191599 | 4.740000  |
| H | 1.947567   | 4.237218  | 3.904644  | C                   | -2.718595 | -4.905716 | 3.467984  |
| H | -4.384705  | 3.358314  | 5.141508  | C                   | -2.789801 | -4.428411 | 5.828602  |
| O | 1.087989   | 5.204098  | 2.351311  | C                   | -1.790818 | -3.881269 | 3.274602  |
| H | 0.316227   | 5.805095  | 2.222815  | C                   | -1.863918 | -3.401770 | 5.652475  |
| H | -9.322688  | -3.389888 | -1.966920 | C                   | -1.350615 | -3.121844 | 4.373906  |
| C | -6.998635  | -4.555094 | -2.969027 | O                   | -0.440313 | -2.127705 | 4.261125  |
| H | -5.923694  | -4.764918 | -2.945227 | C                   | 0.023100  | -7.955999 | 5.839200  |
| H | -7.482402  | -5.222922 | -2.245139 | C                   | 0.537844  | -7.026503 | 6.944135  |
| H | -7.371997  | -4.819285 | -3.964953 | C                   | 1.140706  | -5.742063 | 6.371618  |
| C | -6.706802  | -2.720442 | -1.259524 | C                   | -9.378883 | -1.029636 | -2.302788 |
| H | -6.837739  | -1.660191 | -1.023098 | C                   | -8.259526 | -1.819235 | -2.997437 |
| H | -7.191910  | -3.302503 | -0.465798 | C                   | -8.627737 | -3.313337 | -3.089346 |
| H | -5.633453  | -2.934812 | -1.218863 | C                   | -6.917391 | -1.587595 | -2.287244 |
| H | 0.472314   | -6.660460 | 8.736937  | C                   | -7.674196 | -4.165572 | -3.934335 |
| C | -0.110618  | -2.173798 | 8.547293  | C                   | 2.234001  | -7.135398 | 0.955398  |
| H | -0.864937  | -1.982260 | 7.780414  | C                   | 2.150513  | -6.151985 | 1.945270  |
| H | -0.243034  | -1.463867 | 9.366240  | C                   | 1.724577  | -6.843014 | -0.316431 |
| H | 0.887547   | -2.044730 | 8.121841  | C                   | 1.583801  | -4.903370 | 1.679825  |
| S | -0.311940  | -3.851494 | 9.245980  | C                   | 1.160120  | -5.604394 | -0.598066 |
| N | 5.513679   | 0.090886  | 3.553341  | C                   | 1.070280  | -4.578999 | 0.388270  |
| O | 5.593011   | -0.448645 | 4.662564  | O                   | 0.557979  | -3.409514 | 0.093914  |

|   |           |           |           |   |            |           |           |
|---|-----------|-----------|-----------|---|------------|-----------|-----------|
| C | -3.373800 | 7.834800  | 3.317600  | H | -9.639805  | -3.396158 | -3.508075 |
| C | -2.012235 | 8.455058  | 3.634557  | H | -7.590081  | -3.769119 | -4.953400 |
| C | -0.847345 | 7.825991  | 2.852894  | H | -6.666459  | -4.201955 | -3.508696 |
| O | -0.941482 | 6.540082  | 2.680720  | H | -8.033707  | -5.197266 | -4.010285 |
| O | 0.092832  | 8.534340  | 2.474681  | H | -9.514875  | -1.372899 | -1.269711 |
| C | -3.279297 | 4.777597  | 5.622199  | H | 1.773520   | -7.594902 | -1.102237 |
| C | -1.809500 | 4.387822  | 5.870910  | H | 2.530565   | -6.357578 | 2.944520  |
| O | -1.492712 | 3.691765  | 6.842782  | H | 0.765929   | -5.390244 | -1.587006 |
| C | -4.243500 | 3.829202  | 6.343100  | H | 1.507227   | -4.159817 | 2.467275  |
| N | -0.910707 | 4.867022  | 4.974378  | H | 0.501017   | -2.420202 | 1.081734  |
| C | 0.522197  | 4.585801  | 5.058500  | H | -2.011136  | 9.534096  | 3.450953  |
| C | 1.135430  | 4.037461  | 3.760258  | H | -1.787608  | 8.318444  | 4.702322  |
| C | 0.351554  | 2.841995  | 3.219141  | H | -3.652505  | 8.011870  | 2.272258  |
| C | -3.864699 | 5.557399  | -0.430800 | H | -4.017927  | 3.794414  | 7.410992  |
| C | -2.571574 | 4.802551  | -0.434389 | H | -5.279177  | 4.157866  | 6.212014  |
| C | -2.134515 | 3.711996  | -1.154383 | H | -3.420229  | 5.806349  | 5.978149  |
| N | -1.506658 | 5.137862  | 0.378928  | H | 0.814449   | 2.468646  | 2.303867  |
| C | -0.504196 | 4.261788  | 0.132228  | H | 0.322416   | 2.033085  | 3.958814  |
| N | -0.841133 | 3.375775  | -0.794122 | H | -0.680517  | 3.122673  | 2.988817  |
| O | 0.052874  | 1.846969  | -4.074666 | H | 0.649329   | 3.859148  | 5.864213  |
| O | 0.330675  | -1.659171 | 1.817322  | H | -4.568764  | 5.096048  | -1.127777 |
| H | 2.863831  | 0.258606  | -5.592803 | H | -4.328258  | 5.562403  | 0.562527  |
| H | 1.595282  | 1.244992  | -6.339732 | H | -2.674957  | 3.155910  | -1.908351 |
| H | 0.738689  | -3.403417 | -3.500530 | H | 0.430095   | 4.300778  | 0.674537  |
| H | -0.247641 | -2.104929 | -2.839306 | H | 0.328226   | 1.942590  | -0.433081 |
| H | -0.351891 | -5.566604 | -4.219159 | H | -4.163786  | 8.262073  | 3.945597  |
| H | -2.574204 | -2.472448 | -2.235650 | H | -10.335955 | -1.151060 | -2.822423 |
| H | -2.165913 | -7.180816 | -3.742212 | H | 2.664376   | 0.279784  | -7.364665 |
| H | -4.386919 | -4.083743 | -1.746916 | H | 5.501436   | -0.242528 | -4.428270 |
| H | -4.197944 | -6.445733 | -2.507622 | H | 3.980862   | 3.736155  | -2.856139 |
| H | -0.260821 | -3.053004 | -5.757295 | H | 2.678199   | -8.103222 | 1.168793  |
| H | -4.416048 | -4.118873 | -7.638186 | H | -0.389948  | -8.877306 | 6.262873  |
| H | -4.747606 | -3.891591 | -5.913506 | H | 1.068246   | 5.496714  | 5.338983  |
| H | -4.418273 | -1.687541 | -8.018478 | H | -3.945962  | -5.990004 | 4.879085  |
| H | -5.772714 | -1.884575 | -6.896502 | H | -1.460107  | 5.831643  | 1.142694  |
| H | -3.666802 | -0.201351 | -6.268646 | H | -0.443734  | 0.990540  | -4.154546 |
| H | -4.429401 | -1.171274 | -5.004292 | H | -0.765989  | -7.471114 | 5.254708  |
| H | -2.364822 | -4.116955 | -5.832016 | H | -1.211153  | 5.470644  | 4.203463  |
| H | 2.164732  | 3.292789  | -4.451422 | H | 1.156992   | -0.886862 | -4.341934 |
| H | 1.473072  | 3.687516  | -2.887079 | H | 4.212297   | 0.477731  | -1.881573 |
| H | 3.336037  | 2.545872  | -1.713097 | H | 3.630422   | -4.015848 | 0.690501  |
| H | 5.018855  | -2.500028 | -4.088989 | C | 0.657009   | 0.067163  | 0.144484  |
| H | 3.546408  | -1.709253 | -3.551088 | C | 1.002850   | -0.441589 | 1.559911  |
| H | 2.641848  | -2.714839 | -1.168833 | H | 0.589090   | 0.297272  | 2.258475  |
| H | 7.591956  | -2.706722 | -2.745494 | H | 1.129236   | -0.577065 | -0.609793 |
| H | 9.251540  | -3.851898 | -1.314510 | C | 5.201004   | -0.713896 | 2.561698  |
| H | 6.198291  | -4.892773 | 1.553210  | C | 4.271972   | -1.509600 | 3.233613  |
| H | 8.573228  | -4.928612 | 0.810514  | C | 4.808564   | 0.178086  | 1.563925  |
| H | 6.336323  | -0.618388 | -2.921085 | C | 2.930882   | -1.412363 | 2.883463  |
| H | -3.047029 | -5.487502 | 2.610651  | H | 4.605641   | -2.183992 | 4.011979  |
| H | -3.175602 | -4.631600 | 6.824237  | C | 3.460249   | 0.264125  | 1.229755  |
| H | -1.400367 | -3.668479 | 2.283934  | H | 5.551633   | 0.787678  | 1.065579  |
| H | -1.523603 | -2.803584 | 6.492224  | C | 2.499838   | -0.534869 | 1.874007  |
| H | -0.176333 | -1.979321 | 3.302046  | H | 2.197641   | -2.018153 | 3.401511  |
| H | -0.286575 | -6.768640 | 7.620162  | H | 3.136530   | 0.969940  | 0.474383  |
| H | 2.002645  | -5.972131 | 5.735473  | H | -0.429125  | -0.041447 | 0.037299  |
| H | 0.398946  | -5.211452 | 5.766865  | H | -3.727775  | 6.602385  | -0.733186 |
| H | 0.826235  | -8.235712 | 5.148463  | H | -3.355662  | 6.756295  | 3.472971  |
| H | -8.167646 | -1.437890 | -4.026260 | H | -3.476617  | 4.792006  | 4.545263  |
| H | -6.087927 | -2.086652 | -2.797638 | H | -9.148576  | 0.040721  | -2.267653 |
| H | -6.678538 | -0.519748 | -2.238210 | H | -2.140580  | -3.302622 | -7.397858 |
| H | -6.952296 | -1.966097 | -1.257890 | H | 2.144911   | 3.694791  | 4.028494  |
| H | -8.685995 | -3.726890 | -2.072045 | O | 1.336115   | 5.045957  | 2.773228  |

H 0.532429 5.619242 2.705166  
H -4.156904 2.810567 5.953358  
H 1.289430 -7.547565 7.550116  
S 1.691542 -4.614939 7.717869  
C 2.262510 -3.193073 6.718636  
H 2.587686 -2.419076 7.416925  
H 3.108243 -3.479189 6.087930  
H 1.452480 -2.801469 6.098422  
N 6.613186 -0.811657 2.917365  
O 6.943957 -1.628718 3.783211  
O 7.415947 -0.072387 2.339213

**RC-R-r1**

C 3.175868 0.912239 -5.906058  
C 2.331369 -0.357691 -5.835963  
O 2.149665 -1.062427 -6.834402  
N 1.780846 -0.656176 -4.621245  
C 0.852914 -1.778204 -4.478727  
C -0.596632 -1.269822 -4.626248  
O -0.939675 -0.222728 -4.048774  
C 1.054869 -2.459171 -3.100941  
C 0.274225 -3.745827 -2.936679  
C 0.814927 -4.967030 -3.368045  
C -1.007819 -3.749047 -2.369129  
C 0.093666 -6.156529 -3.243661  
C -1.733527 -4.935570 -2.245267  
C -1.186063 -6.143552 -2.683438  
N -1.476362 -1.972293 -5.366226  
C -1.254886 -3.242314 -6.089028  
C -2.676944 -3.694371 -6.446901  
C -3.433839 -2.370646 -6.636889  
C -2.855530 -1.471544 -5.537500  
C 3.780841 3.882657 -2.458868  
C 5.047630 3.016238 -2.521759  
O 6.160357 3.544461 -2.639883  
C 2.438250 3.199564 -2.766478  
C 2.030536 2.167488 -1.692937  
O 1.758563 2.609774 -0.552865  
O 2.047307 0.926077 -2.025526  
N 4.905844 1.666759 -2.423965  
C 6.067360 0.782824 -2.484446  
C 5.671487 -0.696876 -2.648595  
C 5.442065 -1.431786 -1.359121  
C 4.261408 -1.578505 -0.670893  
C 6.452018 -2.105496 -0.579790  
C 5.805354 -2.645277 0.569175  
C 7.834327 -2.314886 -0.739906  
N 4.475536 -2.299825 0.488029  
C 6.497746 -3.381335 1.538627  
C 8.525667 -3.042508 0.222061  
C 7.862902 -3.570904 1.350532  
C -2.869941 -4.023121 5.151953  
C -2.422997 -3.682137 3.875060  
C -2.340820 -3.353547 6.260003  
C -1.452201 -2.695695 3.697568  
C -1.369472 -2.366615 6.098185  
C -0.913342 -2.038488 4.813326  
O 0.061976 -1.089259 4.716743  
C 0.494526 -6.265558 6.895749  
C 1.086863 -5.187557 7.810577  
C 1.821337 -4.107671 7.013640  
C -8.547890 -1.334298 -2.931856  
C -8.030292 -2.630741 -3.566806

C -6.803296 -3.249163 -2.868006  
C 3.171202 -5.685598 2.214663  
C 2.888190 -4.519649 2.927152  
C 2.526448 -5.909207 0.993466  
C 1.985159 -3.575302 2.426694  
C 1.623699 -4.980979 0.481716  
C 1.352879 -3.801259 1.192370  
O 0.473403 -2.923454 0.640801  
C -4.212872 8.688319 2.262425  
C -2.957661 8.892695 1.410097  
C -1.901567 7.804135 1.648784  
O -2.314618 6.592779 1.662663  
O -0.713998 8.168882 1.827969  
C -4.073066 5.909325 4.893738  
C -2.612949 5.858381 5.380333  
O -2.353560 5.685589 6.578898  
C -4.983170 4.947733 5.666644  
N -1.659064 6.048050 4.433164  
C -0.232472 6.107206 4.764345  
C 0.721491 5.492271 3.716778  
C 0.192441 4.186304 3.112319  
C -4.014284 6.005484 -1.236288  
C -2.776985 5.241433 -1.558746  
C -2.383841 4.534197 -2.670006  
N -1.724674 5.133144 -0.673299  
C -0.759510 4.382455 -1.265633  
N -1.124508 4.000089 -2.482308  
O -0.166169 2.502890 -4.807593  
O 0.497994 -0.529553 2.024281  
H 3.779110 1.064430 -5.007959  
H 2.499275 1.768589 -6.003354  
H 2.126253 -2.658790 -2.998499  
H 0.783409 -1.746352 -2.316728  
H 1.812811 -4.985039 -3.799705  
H -1.433721 -2.816386 -2.010817  
H 0.532611 -7.091700 -3.579894  
H -2.722962 -4.916964 -1.796916  
H -1.748260 -7.067402 -2.582527  
H 1.094157 -2.478529 -5.279331  
H -2.692185 -4.336614 -7.331118  
H -3.105509 -4.257444 -5.610604  
H -3.212891 -1.948565 -7.623594  
H -4.518135 -2.478316 -6.552507  
H -2.835877 -0.411108 -5.799052  
H -3.405810 -1.566762 -4.594308  
H -0.731474 -3.966351 -5.463642  
H 2.451336 2.735806 -3.753319  
H 1.664246 3.971477 -2.788817  
H 3.739166 4.308868 -1.448478  
H 6.478809 -1.196239 -3.196824  
H 4.785921 -0.763683 -3.291442  
H 3.281002 -1.192163 -0.915331  
H 8.356910 -1.912603 -1.603805  
H 9.593263 -3.208028 0.106971  
H 5.984066 -3.791812 2.402491  
H 8.428728 -4.136269 2.085685  
H 6.688783 0.906751 -1.588205  
H -2.826579 -4.188005 3.002507  
H -2.685799 -3.599834 7.260399  
H -1.107643 -2.453388 2.699113  
H -0.950287 -1.844678 6.952693  
H 0.272874 -0.899071 3.778157  
H 0.284254 -4.721950 8.395023



H 2.660788 -4.543392 6.460373  
H 1.140893 -3.642259 6.294243  
H 1.272933 -6.749521 6.295300  
H -7.763862 -2.432941 -4.613957  
H -6.006066 -2.492152 -2.881324  
H -8.978781 -1.511386 -1.940963  
H 2.733766 -6.813785 0.428515  
H 3.369688 -4.333312 3.882939  
H 1.128287 -5.142453 -0.469359  
H 1.762268 -2.678970 2.996536  
H 0.468672 -2.072949 1.131313  
H -3.230368 8.868559 0.346186  
H -2.502007 9.868659 1.602231  
H -4.650770 7.707518 2.065616  
H -4.882551 5.115636 6.741477  
H -6.030144 5.092569 5.383555  
H -4.417602 6.940385 5.047395  
H 0.949930 3.758920 2.449240  
H -0.046534 3.455375 3.894531  
H -0.711106 4.369213 2.524015  
H -0.120729 5.581766 5.716684  
H -4.764281 5.851922 -2.016932  
H -4.444425 5.692063 -0.279823  
H -2.934150 4.378959 -3.588434  
H 0.172807 4.110820 -0.785776  
H -0.380989 3.013412 -3.997297  
H -4.966800 9.455115 2.052180  
H -9.329744 -0.881174 -3.551131  
H 3.816606 0.857957 -6.786442  
H 6.684514 1.102943 -3.331750  
H 3.959834 4.717600 -3.142836  
H 3.876458 -6.411597 2.606344  
H -0.006594 -7.043161 7.481457  
H 0.082105 7.147131 4.927255  
H -3.625430 -4.791447 5.283812  
H -1.717866 5.574214 0.258387  
H -0.321683 1.582949 -4.537884  
H -0.241634 -5.836429 6.208498  
H -1.940054 6.188020 3.457620  
H 1.856240 0.002587 -3.837894  
H 3.980525 1.251197 -2.316001  
H 3.755209 -2.593899 1.133557  
C -0.218539 0.727097 1.706804  
C 1.171010 0.552837 1.288313  
H 1.949652 1.054204 1.853603  
H -0.391676 1.306155 2.611231  
C -1.411236 0.610864 0.820638  
C -1.314120 0.483442 -0.572562  
C -2.676744 0.633230 1.430005  
C -2.465786 0.350728 -1.347092  
H -0.348128 0.509937 -1.067817  
C -3.833756 0.508736 0.672701  
H -2.752739 0.746415 2.506968  
C -3.705437 0.359951 -0.708657  
H -2.388849 0.247429 -2.422379  
H -4.814796 0.521771 1.128716  
H 1.410661 0.323340 0.256289  
H -3.823689 7.082483 -1.162867  
H -3.974551 8.740237 3.330169  
H -4.118239 5.727639 3.815446  
H -7.740891 -0.604778 -2.811682  
H -0.654331 -3.060800 -6.989583  
H 1.639219 5.254583 4.274899

O 1.129704 6.406467 2.715348  
H 0.359802 6.921810 2.364031  
H -4.719463 3.904168 5.465150  
H -8.838183 -3.377166 -3.596047  
C -7.080738 -3.611535 -1.401451  
H -6.202465 -4.077431 -0.940685  
H -7.335377 -2.730286 -0.805538  
H -7.912555 -4.323681 -1.324172  
C -6.302128 -4.476075 -3.643721  
H -6.074583 -4.224214 -4.685957  
H -5.392544 -4.889280 -3.193281  
H -7.058363 -5.271498 -3.652391  
N -4.923699 0.212704 -1.509639  
O -6.010849 0.312345 -0.934170  
O -4.808305 -0.007938 -2.718154  
H 1.775206 -5.646028 8.531428  
C 3.053938 -1.594229 6.862252  
H 2.232879 -1.292203 6.207378  
H 3.429822 -0.719984 7.397790  
H 3.866319 -2.022613 6.269467  
S 2.464820 -2.785410 8.119803

**TS1-R-C1-r1**

C 3.120910 0.102793 -5.871617  
C 2.270882 -1.163112 -5.806262  
O 2.066397 -1.852642 -6.809828  
N 1.738933 -1.476539 -4.585709  
C 0.798006 -2.587592 -4.444279  
C -0.643733 -2.066199 -4.615520  
O -0.979533 -1.001597 -4.066844  
C 0.986623 -3.278635 -3.070154  
C 0.223098 -4.577885 -2.922841  
C 0.794498 -5.789495 -3.339718  
C -1.070077 -4.601694 -2.381993  
C 0.090921 -6.990505 -3.229628  
C -1.778943 -5.799779 -2.273599  
C -1.201253 -6.998592 -2.698496  
N -1.526944 -2.774316 -5.345141  
C -1.309824 -4.051749 -6.054576  
C -2.732760 -4.499398 -6.413449  
C -3.478890 -3.172916 -6.625293  
C -2.900161 -2.263849 -5.534151  
C 3.725722 3.073406 -2.422916  
C 4.987067 2.203618 -2.525535  
O 6.091319 2.745594 -2.655657  
C 2.335825 2.427848 -2.602191  
C 1.940447 1.320535 -1.596895  
O 1.501803 1.689581 -0.462816  
O 2.081611 0.115096 -1.971761  
N 4.848371 0.854608 -2.435346  
C 6.012393 -0.026689 -2.449984  
C 5.672920 -1.469343 -2.889803  
C 5.441636 -2.439129 -1.764636  
C 4.285029 -2.623665 -1.044886  
C 6.414045 -3.343625 -1.202267  
C 5.769142 -4.051759 -0.146474  
C 7.761447 -3.633328 -1.487543  
N 4.474778 -3.589009 -0.075329  
C 6.429892 -5.027907 0.609849  
C 8.421288 -4.598768 -0.736333  
C 7.760708 -5.289647 0.302449  
C -2.924800 -4.832500 5.186200  
C -2.492264 -4.595319 3.879549

|   |           |           |           |   |           |           |           |
|---|-----------|-----------|-----------|---|-----------|-----------|-----------|
| C | -2.478029 | -3.984250 | 6.205938  | H | 9.461826  | -4.827628 | -0.949127 |
| C | -1.622162 | -3.542860 | 3.587152  | H | 5.915808  | -5.561707 | 1.403104  |
| C | -1.606083 | -2.931113 | 5.929569  | H | 8.301311  | -6.040349 | 0.872064  |
| C | -1.161488 | -2.706821 | 4.615839  | H | 6.493465  | -0.044869 | -1.462832 |
| O | -0.292396 | -1.679422 | 4.416310  | H | -2.830819 | -5.235961 | 3.069654  |
| C | 0.439605  | -7.074995 | 6.930199  | H | -2.808923 | -4.142384 | 7.228936  |
| C | 1.165017  | -5.962321 | 7.695907  | H | -1.293468 | -3.383574 | 2.567126  |
| C | 1.625101  | -4.838143 | 6.765356  | H | -1.253944 | -2.274872 | 6.719524  |
| C | -8.602833 | -2.143732 | -2.897398 | H | 0.011773  | -1.613100 | 3.481275  |
| C | -8.096727 | -3.560654 | -2.605447 | H | 0.497727  | -5.548170 | 8.461645  |
| C | -6.873829 | -3.637652 | -1.670123 | H | 2.330967  | -5.220152 | 6.019799  |
| C | 3.116307  | -6.494904 | 2.249194  | H | 0.768419  | -4.410424 | 6.235997  |
| C | 3.001875  | -5.218093 | 2.803076  | H | 1.089231  | -7.521249 | 6.169114  |
| C | 2.261614  | -6.860275 | 1.202829  | H | -7.836014 | -4.049201 | -3.554144 |
| C | 2.053272  | -4.310544 | 2.322038  | H | -6.060469 | -3.065895 | -2.140574 |
| C | 1.310555  | -5.969011 | 0.712425  | H | -9.010886 | -1.665816 | -2.001224 |
| C | 1.196556  | -4.682536 | 1.268433  | H | 2.339249  | -7.849873 | 0.760647  |
| O | 0.256603  | -3.850602 | 0.763818  | H | 3.656950  | -4.917044 | 3.616185  |
| C | -4.267800 | 7.878899  | 2.296897  | H | 0.649009  | -6.245145 | -0.102084 |
| C | -3.019730 | 8.102265  | 1.439465  | H | 1.956217  | -3.320987 | 2.757301  |
| C | -1.949162 | 7.026784  | 1.670877  | H | 0.320178  | -2.941546 | 1.191366  |
| O | -2.347679 | 5.810277  | 1.687237  | H | -3.296596 | 8.077702  | 0.376582  |
| O | -0.765173 | 7.406343  | 1.840907  | H | -2.575503 | 9.083328  | 1.632258  |
| C | -4.128000 | 5.099899  | 4.928193  | H | -4.693860 | 6.893210  | 2.098695  |
| C | -2.666079 | 5.045264  | 5.408784  | H | -4.934233 | 4.303137  | 6.776096  |
| O | -2.403020 | 4.869744  | 6.605941  | H | -6.085372 | 4.286659  | 5.421099  |
| C | -5.038099 | 4.138301  | 5.701105  | H | -4.469620 | 6.131425  | 5.085316  |
| N | -1.712437 | 5.234363  | 4.460175  | H | 0.953685  | 3.082561  | 2.386805  |
| C | -0.287403 | 5.297785  | 4.798796  | H | -0.038659 | 2.677871  | 3.810773  |
| C | 0.685253  | 4.739907  | 3.736864  | H | -0.722231 | 3.648062  | 2.487669  |
| C | 0.183388  | 3.454472  | 3.069051  | H | -0.172787 | 4.736861  | 5.730431  |
| C | -4.069285 | 5.196077  | -1.201812 | H | -4.815457 | 5.048038  | -1.987206 |
| C | -2.812646 | 4.480454  | -1.546584 | H | -4.490942 | 4.837171  | -0.257474 |
| C | -2.397936 | 3.806124  | -2.670264 | H | -2.940826 | 3.655350  | -3.593737 |
| N | -1.763701 | 4.381498  | -0.658315 | H | 0.140257  | 3.390762  | -0.764664 |
| C | -0.780626 | 3.665246  | -1.259340 | H | -0.369840 | 2.252849  | -3.965033 |
| N | -1.127563 | 3.296908  | -2.485373 | H | -5.032627 | 8.636580  | 2.093141  |
| O | -0.120689 | 1.722304  | -4.752602 | H | -9.395942 | -2.157507 | -3.652651 |
| O | 0.610795  | -1.485939 | 1.813373  | H | 3.781863  | 0.037077  | -6.736229 |
| H | 3.702721  | 0.269336  | -4.962194 | H | 6.735712  | 0.420484  | -3.138046 |
| H | 2.447129  | 0.957876  | -5.996908 | H | 3.852062  | 3.870898  | -3.160939 |
| H | 2.058984  | -3.463620 | -2.954979 | H | 3.853253  | -7.195764 | 2.628884  |
| H | 0.693470  | -2.580392 | -2.281145 | H | 0.121264  | -7.873770 | 7.608070  |
| H | 1.801937  | -5.791060 | -3.748837 | H | 0.013494  | 6.333969  | 5.006305  |
| H | -1.519104 | -3.676904 | -2.031276 | H | -3.602791 | -5.651368 | 5.405531  |
| H | 0.553136  | -7.918518 | -3.554229 | H | -1.768246 | 4.811898  | 0.279243  |
| H | -2.778930 | -5.797080 | -1.849195 | H | -0.327791 | 0.810366  | -4.489886 |
| H | -1.750317 | -7.931617 | -2.610221 | H | -0.451058 | -6.687884 | 6.423940  |
| H | 1.040176  | -3.290830 | -5.242529 | H | -1.992106 | 5.387963  | 3.486522  |
| H | -2.747916 | -5.153224 | -7.289041 | H | 1.826517  | -0.821029 | -3.806024 |
| H | -3.168537 | -5.048340 | -5.571515 | H | 3.923884  | 0.445593  | -2.297297 |
| H | -3.247982 | -2.764971 | -7.615562 | H | 3.776148  | -3.893396 | 0.590048  |
| H | -4.564331 | -3.271027 | -6.546485 | C | 0.544229  | 0.184920  | 0.901424  |
| H | -2.870442 | -1.207109 | -5.808731 | C | 1.453427  | -0.948579 | 0.805884  |
| H | -3.458908 | -2.345588 | -4.593916 | H | 2.484354  | -0.744799 | 1.112714  |
| H | -0.792575 | -4.772588 | -5.420773 | H | 0.740121  | 0.872735  | 1.713788  |
| H | 2.232421  | 2.010217  | -3.604838 | C | -0.814949 | 0.205760  | 0.333018  |
| H | 1.597822  | 3.228767  | -2.522799 | C | -1.088347 | -0.267557 | -0.958294 |
| H | 3.779873  | 3.559955  | -1.440238 | C | -1.868600 | 0.695562  | 1.126655  |
| H | 6.504165  | -1.838963 | -3.500165 | C | -2.393227 | -0.295990 | -1.436130 |
| H | 4.803177  | -1.444257 | -3.555927 | H | -0.277403 | -0.567167 | -1.609625 |
| H | 3.337306  | -2.115264 | -1.147024 | C | -3.179878 | 0.659204  | 0.668997  |
| H | 8.281448  | -3.107748 | -2.284262 | H | -1.660412 | 1.078185  | 2.120208  |

C -3.422637 0.147972 -0.606988  
H -2.593113 -0.639762 -2.441328  
H -4.001997 1.009582 1.279124  
H 1.432198 -1.501275 -0.133143  
H -3.910913 6.275019 -1.090615  
H -4.024919 7.930049 3.363625  
H -4.177649 4.920643 3.849587  
H -7.794593 -1.504125 -3.269507  
H -0.705460 -3.881263 -6.954741  
H 1.598782 4.490666 4.296340  
O 1.096949 5.701096 2.782079  
H 0.321546 6.191730 2.407506  
H -4.777464 3.094742 5.496022  
H -8.912430 -4.158341 -2.172061  
C -7.142200 -3.008018 -0.294621  
H -6.282238 -3.144773 0.370282  
H -7.327742 -1.932676 -0.367817  
H -8.011319 -3.473504 0.188162  
C -6.405505 -5.092409 -1.520737  
H -6.180274 -5.542959 -2.494123  
H -5.503056 -5.157911 -0.902734  
H -7.178935 -5.706341 -1.041809  
N -4.802693 0.072661 -1.091618  
O -5.704279 0.475084 -0.351097  
O -5.001970 -0.399999 -2.214967  
H 2.030204 -6.378555 8.226703  
C 2.791313 -2.309453 6.364557  
H 1.872472 -2.027286 5.844517  
H 3.232671 -1.421709 6.822573  
H 3.505908 -2.732491 5.653810  
S 2.440782 -3.490784 7.717277

**Int1-R-C1-r1**

C 3.541211 0.815697 -5.802397  
C 2.679229 -0.447466 -5.766602  
O 2.544581 -1.158813 -6.766716  
N 2.087586 -0.728927 -4.572226  
C 1.288953 -1.928890 -4.365454  
C -0.220107 -1.619886 -4.450564  
O -0.707699 -0.693340 -3.779338  
C 1.628647 -2.576673 -2.996398  
C 0.934036 -3.903174 -2.762129  
C 1.499478 -5.095708 -3.239417  
C -0.290393 -3.972889 -2.081832  
C 0.854535 -6.320075 -3.053519  
C -0.938869 -5.195950 -1.894354  
C -0.369863 -6.373785 -2.383115  
N -1.008997 -2.377409 -5.237738  
C -0.645184 -3.583882 -6.008983  
C -2.005568 -4.192316 -6.378815  
C -2.926456 -2.967453 -6.488918  
C -2.448313 -2.067882 -5.343769  
C 3.794310 3.977103 -2.481325  
C 5.118017 3.195242 -2.438293  
O 6.190207 3.806726 -2.445396  
C 2.540516 3.252137 -2.999076  
C 2.095477 2.150634 -2.064422  
O 1.537409 2.665193 -0.972951  
O 2.360997 0.956366 -2.196307  
N 5.051224 1.837256 -2.362488  
C 6.240459 1.011785 -2.230025  
C 6.116480 -0.392101 -2.841339  
C 5.565286 -1.469393 -1.945659

C 5.044756 -1.359936 -0.677252  
C 5.553296 -2.878117 -2.259042  
C 5.012031 -3.558787 -1.129708  
C 5.959726 -3.631736 -3.375959  
N 4.710690 -2.606283 -0.184245  
C 4.873188 -4.951846 -1.093567  
C 5.823789 -5.015438 -3.343724  
C 5.286419 -5.667612 -2.212531  
C -2.840876 -3.914476 5.155519  
C -2.340810 -3.876996 3.851968  
C -2.360164 -3.000338 6.097952  
C -1.358418 -2.957458 3.492441  
C -1.373272 -2.077867 5.754015  
C -0.848829 -2.061481 4.450297  
O 0.135394 -1.183941 4.159984  
C 0.535431 -5.879476 7.187410  
C 1.225362 -4.725332 7.923812  
C 1.828783 -3.711478 6.949988  
C -8.194069 -1.937168 -3.344486  
C -9.418321 -1.779316 -2.436826  
C -9.184784 -2.144722 -0.957191  
C 3.434441 -5.375567 2.631714  
C 3.907850 -4.141369 3.090066  
C 2.246016 -5.399295 1.889055  
C 3.202970 -2.959782 2.839561  
C 1.536254 -4.230581 1.630834  
C 1.972739 -2.968805 2.123028  
O 1.254314 -1.880728 1.930094  
C -4.694490 8.549352 1.556358  
C -3.207185 8.857198 1.794721  
C -2.350209 8.010983 0.844382  
O -1.989490 6.847793 1.291059  
O -2.130140 8.432428 -0.302367  
C -4.554162 5.911424 4.329220  
C -3.135842 5.991351 4.928407  
O -2.950682 5.925062 6.149084  
C -5.493867 5.119627 5.246416  
N -2.133263 6.149981 4.029534  
C -0.728280 6.317117 4.394134  
C 0.178604 5.234880 3.779281  
C -0.038106 3.857985 4.400259  
C -4.158920 5.717386 -1.785885  
C -2.842474 5.043412 -1.859671  
C -2.329432 4.133597 -2.750942  
N -1.833808 5.279624 -0.954046  
C -0.775211 4.526362 -1.321208  
N -1.035123 3.813974 -2.407710  
O 0.237983 1.934168 -3.929205  
O 2.242608 0.563108 1.972732  
H 3.905357 1.113096 -4.819162  
H 2.952561 1.638098 -6.222351  
H 2.713719 -2.712928 -2.967855  
H 1.370717 -1.871676 -2.200946  
H 2.460543 -5.064324 -3.746192  
H -0.733494 -3.063657 -1.686417  
H 1.312735 -7.232286 -3.425338  
H -1.884909 -5.227086 -1.361491  
H -0.871064 -7.325920 -2.234562  
H 1.571048 -2.613104 -5.167262  
H -1.953143 -4.783333 -7.296557  
H -2.347013 -4.849277 -5.571417  
H -2.773849 -2.464978 -7.450625  
H -3.987073 -3.215962 -6.402853

H -2.587713 -1.000666 -5.529170  
H -2.950229 -2.308024 -4.398316  
H -0.035227 -4.263201 -5.411732  
H 2.700153 2.824133 -3.985562  
H 1.725262 3.972687 -3.077890  
H 3.614564 4.358333 -1.468968  
H 7.124210 -0.696637 -3.155192  
H 5.535962 -0.329553 -3.771422  
H 4.884172 -0.482546 -0.068639  
H 6.374434 -3.140120 -4.252012  
H 6.136471 -5.606679 -4.199965  
H 4.456742 -5.447254 -0.221637  
H 5.193202 -6.750022 -2.215967  
H 6.537165 0.929426 -1.175053  
H -2.718198 -4.570897 3.105050  
H -2.752475 -3.007889 7.111698  
H -0.962129 -2.919525 2.484059  
H -0.986290 -1.371410 6.482306  
H 0.549680 -1.423635 3.266448  
H 0.499179 -4.217567 8.570297  
H 2.604415 -4.179321 6.334244  
H 1.054284 -3.321358 6.283770  
H 1.237024 -6.408415 6.532816  
H -10.230797 -2.407933 -2.826505  
H -8.774615 -3.166216 -0.929858  
H -7.375295 -1.275614 -3.045099  
H 1.866924 -6.345394 1.508064  
H 4.836953 -4.094109 3.654456  
H 0.619923 -4.262012 1.048326  
H 3.568769 -2.006799 3.214246  
H 1.905519 -0.375356 2.016730  
H -3.013784 9.916683 1.597897  
H -2.942743 8.643671 2.835313  
H -4.973555 8.792388 0.526005  
H -5.480553 5.540048 6.254041  
H -6.519922 5.143558 4.866671  
H -4.921284 6.938913 4.212169  
H 0.588146 3.112738 3.900569  
H 0.220008 3.865127 5.464534  
H -1.084047 3.552743 4.297383  
H -0.656202 6.295380 5.483383  
H -4.753429 5.489558 -2.674558  
H -4.738690 5.401668 -0.909035  
H -2.814854 3.696856 -3.613341  
H 0.154900 4.522809 -0.777253  
H -0.252100 2.570485 -3.350239  
H -5.337489 9.129534 2.227020  
H -8.443207 -1.702982 -4.385007  
H 4.386813 0.633645 -6.468323  
H 7.048107 1.554677 -2.727453  
H 3.990278 4.851192 -3.107705  
H 3.981441 -6.290886 2.836861  
H 0.125933 -6.607300 7.895841  
H -0.388376 7.302678 4.049091  
H -3.607011 -4.633610 5.430415  
H -1.869963 5.913394 -0.125143  
H -0.134613 1.053024 -3.758254  
H -0.289238 -5.512351 6.567582  
H -2.346721 6.302691 3.037514  
H 2.142722 -0.050782 -3.814517  
H 4.155675 1.365312 -2.320172  
H 4.281194 -2.780799 0.718732  
C 1.232911 1.879986 0.233155

C 2.346129 0.879880 0.606581  
H 3.306468 1.378277 0.406302  
H 1.248086 2.655051 1.002007  
C -0.172767 1.320980 0.157931  
C -0.519449 0.311351 -0.750409  
C -1.158151 1.851459 1.002769  
C -1.821453 -0.170862 -0.813268  
H 0.214734 -0.070042 -1.446289  
C -2.463135 1.369931 0.965207  
H -0.908274 2.667723 1.673814  
C -2.774360 0.358063 0.057569  
H -2.099239 -0.917242 -1.544583  
H -3.231974 1.770517 1.612908  
H 2.298310 -0.015159 -0.015867  
H -4.040099 6.804595 -1.718092  
H -4.905962 7.488532 1.719663  
H -4.513225 5.475734 3.325591  
H -7.813951 -2.965233 -3.317601  
H -0.076134 -3.300026 -6.903191  
H -9.784629 -0.743767 -2.490455  
C -10.517097 -2.155493 -0.192437  
H -11.234687 -2.849402 -0.644966  
H -10.373800 -2.453143 0.852094  
H -10.974311 -1.157991 -0.191744  
C -8.177682 -1.211468 -0.268440  
H -7.180705 -1.251068 -0.714924  
H -8.522697 -0.170400 -0.312855  
H -8.065801 -1.473852 0.789473  
H -5.183070 4.072730 5.318299  
H 1.215142 5.551821 3.986009  
O 0.004399 5.115880 2.363858  
H -0.493677 5.876459 2.006755  
N -4.148076 -0.142983 -0.002123  
O -4.982871 0.348099 0.761761  
O -4.408745 -1.035009 -0.816378  
C 3.014211 -1.214167 6.441284  
H 2.143370 -1.028041 5.807793  
H 3.372108 -0.269548 6.856365  
H 3.810808 -1.667481 5.846674  
S 2.563603 -2.286344 7.854625  
H 2.010255 -5.118098 8.582354

**TS2-R-C1-r1**

C 3.408700 -0.051000 -5.752200  
C 2.545367 -1.314714 -5.713301  
O 2.379856 -2.006530 -6.724570  
N 1.983040 -1.609096 -4.510504  
C 1.156500 -2.795500 -4.315300  
C -0.336989 -2.446201 -4.427488  
O -0.796209 -1.461539 -3.818854  
C 1.482049 -3.446083 -2.944212  
C 0.790898 -4.773338 -2.712599  
C 1.359930 -5.964197 -3.189865  
C -0.431795 -4.846435 -2.030527  
C 0.718442 -7.190161 -3.003432  
C -1.077015 -6.070891 -1.842366  
C -0.505361 -7.246984 -2.332097  
N -1.137189 -3.236089 -5.177558  
C -0.777700 -4.450600 -5.958700  
C -2.142054 -5.049497 -6.323194  
C -3.056289 -3.819926 -6.435895  
C -2.573217 -2.916387 -5.295710  
C 3.661500 3.110400 -2.431700

|   |           |           |           |   |            |           |           |
|---|-----------|-----------|-----------|---|------------|-----------|-----------|
| C | 4.980100  | 2.316978  | -2.389076 | H | 2.320880   | -5.930019 | -3.696675 |
| O | 6.057816  | 2.925896  | -2.422386 | H | -0.875535  | -3.938924 | -1.631811 |
| C | 2.413958  | 2.456153  | -3.052745 | H | 1.178930   | -8.101322 | -3.375007 |
| C | 1.778872  | 1.284465  | -2.268283 | H | -2.022067  | -6.104732 | -1.307914 |
| O | 1.382243  | 1.824277  | -1.035103 | H | -1.003821  | -8.200474 | -2.182984 |
| O | 2.286551  | 0.114592  | -2.285235 | H | 1.431905   | -3.488032 | -5.112858 |
| N | 4.905199  | 0.964612  | -2.279028 | H | -2.095064  | -5.643030 | -7.239696 |
| C | 6.107700  | 0.145100  | -2.179700 | H | -2.485664  | -5.702594 | -5.513601 |
| C | 5.980340  | -1.258276 | -2.791369 | H | -2.902411  | -3.322570 | -7.400095 |
| C | 5.435577  | -2.337615 | -1.894465 | H | -4.118046  | -4.063111 | -6.348083 |
| C | 4.913624  | -2.228129 | -0.626870 | H | -2.703515  | -1.849703 | -5.490725 |
| C | 5.424018  | -3.746422 | -2.207428 | H | -3.082298  | -3.144597 | -4.350958 |
| C | 4.881286  | -4.427301 | -1.078512 | H | -0.168376  | -5.132075 | -5.363823 |
| C | 5.830033  | -4.500320 | -3.324263 | H | 2.625737   | 2.095356  | -4.060694 |
| N | 4.579571  | -3.474674 | -0.133493 | H | 1.653730   | 3.235536  | -3.150080 |
| C | 4.740972  | -5.820175 | -1.043256 | H | 3.435378   | 3.408974  | -1.400710 |
| C | 5.692329  | -5.884015 | -3.293059 | H | 6.985923   | -1.562744 | -3.113336 |
| C | 5.153646  | -6.536145 | -2.162509 | H | 5.391019   | -1.194186 | -3.715818 |
| C | -2.973400 | -4.781200 | 5.205700  | H | 4.746972   | -1.349557 | -0.021721 |
| C | -2.472845 | -4.744177 | 3.902031  | H | 6.245655   | -4.008561 | -4.199851 |
| C | -2.491316 | -3.866057 | 6.146716  | H | 6.004648   | -6.475147 | -4.149592 |
| C | -1.489800 | -3.825516 | 3.541314  | H | 4.323500   | -6.315552 | -0.171739 |
| C | -1.503844 | -2.944332 | 5.801613  | H | 5.058956   | -7.618482 | -2.166470 |
| C | -0.978528 | -2.928501 | 4.497722  | H | 6.432880   | 0.060042  | -1.132851 |
| O | 0.005750  | -2.051785 | 4.206944  | H | -2.850386  | -5.438388 | 3.155388  |
| C | 0.402900  | -6.746200 | 7.237600  | H | -2.883002  | -3.872101 | 7.160773  |
| C | 1.092938  | -5.592085 | 7.973957  | H | -1.093157  | -3.788856 | 2.533028  |
| C | 1.696190  | -4.578173 | 7.000104  | H | -1.116717  | -2.237714 | 6.529730  |
| C | -8.326600 | -2.803900 | -3.294300 | H | 0.423281   | -2.289414 | 3.311654  |
| C | -9.550811 | -2.646040 | -2.386597 | H | 0.366834   | -5.084372 | 8.620596  |
| C | -9.317224 | -3.011317 | -0.906937 | H | 2.471792   | -5.045870 | 6.384232  |
| C | 3.301900  | -6.242300 | 2.681900  | H | 0.921639   | -4.188067 | 6.333954  |
| C | 3.771851  | -5.006271 | 3.139789  | H | 1.104387   | -7.274993 | 6.582785  |
| C | 2.113748  | -6.268165 | 1.938664  | H | -10.363210 | -3.274757 | -2.776229 |
| C | 3.064733  | -3.826159 | 2.888268  | H | -8.906748  | -4.032661 | -0.879511 |
| C | 1.401799  | -5.100889 | 1.679386  | H | -7.507722  | -2.142513 | -2.994744 |
| C | 1.834450  | -3.836639 | 2.170604  | H | 1.736479   | -7.215148 | 1.557805  |
| O | 1.114559  | -2.750757 | 1.977291  | H | 4.700686   | -4.956482 | 3.704546  |
| C | -4.827000 | 7.682500  | 1.606500  | H | 0.485770   | -5.135079 | 1.096418  |
| C | -3.333680 | 7.970837  | 1.835431  | H | 3.428703   | -2.872102 | 3.262099  |
| C | -2.495069 | 7.126130  | 0.868868  | H | 1.774661   | -1.206928 | 1.974803  |
| O | -2.137798 | 5.954594  | 1.299860  | H | -3.129787  | 9.029868  | 1.647442  |
| O | -2.284299 | 7.552717  | -0.277562 | H | -3.062723  | 7.743851  | 2.871269  |
| C | -4.686700 | 5.044700  | 4.379400  | H | -5.111653  | 7.938221  | 0.580797  |
| C | -3.268805 | 5.126307  | 4.977503  | H | -5.613126  | 4.673405  | 6.304187  |
| O | -3.082912 | 5.065567  | 6.197993  | H | -6.652384  | 4.277041  | 4.916774  |
| C | -5.626400 | 4.252900  | 5.296600  | H | -5.054151  | 6.072085  | 4.262257  |
| N | -2.265611 | 5.282697  | 4.078060  | H | 0.455294   | 2.248347  | 3.935686  |
| C | -0.860800 | 5.450400  | 4.444300  | H | 0.094661   | 2.993778  | 5.505363  |
| C | 0.046148  | 4.370155  | 3.826095  | H | -1.214720  | 2.686117  | 4.342498  |
| C | -0.168384 | 2.990945  | 4.442325  | H | -0.791022  | 5.424999  | 5.533501  |
| C | -4.291300 | 4.850500  | -1.735800 | H | -4.892624  | 4.629637  | -2.621029 |
| C | -2.983242 | 4.160082  | -1.813016 | H | -4.865815  | 4.538710  | -0.855010 |
| C | -2.500466 | 3.214248  | -2.680472 | H | -2.988997  | 2.752875  | -3.525874 |
| N | -1.964369 | 4.407562  | -0.918246 | H | 0.013884   | 3.607042  | -0.720035 |
| C | -0.922679 | 3.630755  | -1.249759 | H | -0.433390  | 1.941182  | -2.803155 |
| N | -1.212818 | 2.891116  | -2.315837 | H | -5.456550  | 8.264659  | 2.287898  |
| O | 0.339262  | 1.182414  | -3.207128 | H | -8.575707  | -2.569586 | -4.334809 |
| O | 2.115078  | -0.274833 | 1.921028  | H | 4.284399   | -0.252066 | -6.373363 |
| H | 3.724502  | 0.280066  | -4.763311 | H | 6.897977   | 0.696266  | -2.695851 |
| H | 2.839603  | 0.752716  | -6.231205 | H | 3.896205   | 4.027537  | -2.977964 |
| H | 2.567195  | -3.581442 | -2.911197 | H | 3.850869   | -7.156305 | 2.887662  |
| H | 1.223717  | -2.742126 | -2.148241 | H | -0.006426  | -7.474145 | 7.946030  |



|   |            |           |           |   |            |           |           |
|---|------------|-----------|-----------|---|------------|-----------|-----------|
| C | -2.512438  | 3.068195  | -2.693085 | H | -2.801210  | 2.631539  | -3.635457 |
| N | -2.350774  | 4.155324  | -0.784213 | H | -0.378250  | 3.472759  | -0.285805 |
| C | -1.217649  | 3.477047  | -0.959060 | H | -0.568733  | 2.140630  | -2.489930 |
| N | -1.291903  | 2.810348  | -2.111947 | H | -6.114849  | 8.168663  | 1.540749  |
| O | 0.513468   | 1.188831  | -3.130744 | H | -8.199341  | -3.117667 | -4.604134 |
| O | 2.207719   | -0.198503 | 1.913777  | H | 4.599693   | -0.055755 | -6.095700 |
| H | 3.852664   | 0.508153  | -4.572399 | H | 6.948373   | 1.145538  | -2.381877 |
| H | 3.090564   | 0.857813  | -6.142565 | H | 3.758563   | 4.278707  | -2.810939 |
| H | 2.889381   | -3.399286 | -2.658683 | H | 4.203968   | -6.797475 | 3.242730  |
| H | 1.416930   | -2.688276 | -2.012782 | H | 0.219427   | -7.330453 | 8.121722  |
| H | 2.929290   | -5.754495 | -3.445997 | H | -1.317673  | 6.526275  | 4.080258  |
| H | -0.599282  | -4.081318 | -1.658009 | H | -3.562211  | -5.647285 | 5.507589  |
| H | 1.975135   | -8.024874 | -3.208495 | H | -2.634359  | 4.738903  | 0.079221  |
| H | -1.558419  | -6.345975 | -1.419157 | H | 0.335707   | 0.232339  | -3.226987 |
| H | -0.278725  | -8.333848 | -2.198885 | H | -0.316912  | -6.341071 | 6.754417  |
| H | 1.894242   | -3.449203 | -4.944073 | H | -2.919965  | 4.869590  | 2.966281  |
| H | -1.375438  | -5.840110 | -7.222028 | H | 2.364632   | -0.855735 | -3.565054 |
| H | -1.888648  | -5.880834 | -5.527901 | H | 4.014774   | 0.774603  | -2.058530 |
| H | -2.273159  | -3.565071 | -7.499130 | H | 4.416431   | -3.363543 | 1.046508  |
| H | -3.527223  | -4.337717 | -6.517506 | C | 1.110417   | 1.067564  | 0.158584  |
| H | -2.278933  | -2.041801 | -5.619335 | C | 2.305148   | 0.168981  | 0.549366  |
| H | -2.680497  | -3.327526 | -4.476715 | H | 3.214671   | 0.763449  | 0.395924  |
| H | 0.382639   | -5.199676 | -5.222143 | H | 1.053657   | 1.811702  | 0.961905  |
| H | 2.664566   | 2.317636  | -4.005168 | C | -0.223486  | 0.326332  | 0.160270  |
| H | 1.582667   | 3.367696  | -3.115916 | C | -0.501891  | -0.681803 | -0.773284 |
| H | 3.245912   | 3.596041  | -1.275780 | C | -1.217406  | 0.666812  | 1.091417  |
| H | 7.203750   | -1.101898 | -2.776141 | C | -1.745246  | -1.298171 | -0.820806 |
| H | 5.600347   | -0.859967 | -3.420081 | H | 0.254253   | -0.962697 | -1.492250 |
| H | 4.894447   | -1.034813 | 0.270047  | C | -2.463781  | 0.046019  | 1.080124  |
| H | 6.653235   | -3.598552 | -3.867144 | H | -1.021850  | 1.443822  | 1.823064  |
| H | 6.574605   | -6.075308 | -3.812260 | C | -2.716124  | -0.924287 | 0.109987  |
| H | 4.802445   | -6.016665 | 0.128737  | H | -1.970987  | -2.034895 | -1.579719 |
| H | 5.663346   | -7.273853 | -1.845484 | H | -3.234343  | 0.311510  | 1.792457  |
| H | 6.465353   | 0.500362  | -0.828405 | H | 2.370019   | -0.702976 | -0.102638 |
| H | -2.496089  | -5.772177 | 3.258715  | H | -4.455230  | 5.627923  | -2.084648 |
| H | -3.046171  | -3.717380 | 6.996923  | H | -5.674145  | 6.475884  | 1.835580  |
| H | -0.911311  | -4.001484 | 2.526003  | H | -5.064623  | 4.312129  | 3.141984  |
| H | -1.447724  | -1.961285 | 6.259386  | H | -7.581695  | -4.421704 | -3.581137 |
| H | 0.337898   | -2.204449 | 3.177329  | H | 0.409833   | -4.267943 | -6.734921 |
| H | 0.265706   | -4.896268 | 8.728229  | H | 0.630193   | 5.184570  | 3.834867  |
| H | 2.370715   | -4.637709 | 6.505578  | O | -0.535709  | 4.639966  | 2.198819  |
| H | 0.721661   | -3.992294 | 6.422071  | H | -0.828390  | 5.532411  | 1.889327  |
| H | 1.314129   | -7.027143 | 6.764388  | H | -5.781934  | 2.975817  | 5.168672  |
| H | -10.004850 | -3.886270 | -3.097494 | H | -9.564900  | -2.236920 | -2.688490 |
| H | -8.568123  | -4.719030 | -1.215534 | C | -10.324858 | -3.746820 | -0.460671 |
| H | -7.148294  | -2.744156 | -3.235039 | H | -10.194308 | -4.088356 | 0.572011  |
| H | 2.224392   | -7.085762 | 1.746723  | H | -10.786075 | -2.751881 | -0.423439 |
| H | 4.784788   | -4.508052 | 4.048022  | H | -11.033394 | -4.423277 | -0.952176 |
| H | 0.838813   | -5.140081 | 1.109638  | C | -7.989424  | -2.791019 | -0.465128 |
| H | 3.380561   | -2.559457 | 3.421913  | H | -6.986974  | -2.804418 | -0.900960 |
| H | 1.833453   | -1.117688 | 1.946778  | H | -8.340872  | -1.751155 | -0.467154 |
| H | -3.683469  | 8.710003  | 1.065794  | H | -7.887657  | -3.099304 | 0.581273  |
| H | -3.883865  | 8.077597  | 2.681855  | N | -4.035268  | -1.548685 | 0.048741  |
| H | -5.504193  | 7.157136  | 0.223319  | O | -4.887160  | -1.205076 | 0.873189  |
| H | -6.235064  | 4.474447  | 5.991048  | O | -4.241850  | -2.390897 | -0.833007 |
| H | -7.147028  | 3.929575  | 4.566066  | H | 1.883666   | -5.585015 | 8.776390  |
| H | -5.642876  | 5.781363  | 3.912418  | S | 2.071144   | -2.731222 | 7.976166  |
| H | 0.546046   | 2.684650  | 3.528580  | C | 2.491699   | -1.678777 | 6.539163  |
| H | 0.062801   | 3.197840  | 5.154770  | H | 2.731258   | -0.686672 | 6.927781  |
| H | -1.172680  | 2.711994  | 3.977906  | H | 3.361416   | -2.074311 | 6.009461  |
| H | -1.312335  | 5.364399  | 5.417526  | H | 1.646222   | -1.605336 | 5.850533  |
| H | -5.051485  | 4.145445  | -2.847741 |   |            |           |           |
| H | -5.133282  | 4.343003  | -1.087275 |   |            |           |           |

TS3-R-C1-r1

|   |           |           |           |   |           |           |           |
|---|-----------|-----------|-----------|---|-----------|-----------|-----------|
| C | 3.647996  | 0.062967  | -5.617978 | C | -5.099932 | 4.754770  | 4.160903  |
| C | 2.869916  | -1.260083 | -5.612361 | C | -3.682925 | 4.779221  | 4.763597  |
| O | 2.678319  | -1.905056 | -6.648965 | O | -3.479895 | 4.472289  | 5.942066  |
| N | 2.407245  | -1.658200 | -4.396157 | C | -6.095034 | 3.980157  | 5.030069  |
| C | 1.509021  | -2.797966 | -4.235074 | N | -2.687911 | 5.165381  | 3.916482  |
| C | 0.076196  | -2.402055 | -4.645792 | C | -1.309038 | 5.386036  | 4.360015  |
| O | -0.396962 | -1.313446 | -4.268711 | C | -0.370791 | 4.213851  | 4.012765  |
| C | 1.542827  | -3.239741 | -2.749325 | C | -0.650232 | 2.942508  | 4.812156  |
| C | 0.673973  | -4.436932 | -2.427357 | C | -4.469071 | 4.534016  | -1.934007 |
| C | 1.172505  | -5.743073 | -2.549226 | C | -3.044639 | 4.236429  | -1.592024 |
| C | -0.653469 | -4.267026 | -2.008097 | C | -2.164249 | 3.331955  | -2.132298 |
| C | 0.364073  | -6.847367 | -2.270896 | N | -2.356384 | 4.867461  | -0.569829 |
| C | -1.464748 | -5.368211 | -1.728005 | C | -1.125174 | 4.354141  | -0.500861 |
| C | -0.958940 | -6.663136 | -1.861578 | N | -0.975304 | 3.423783  | -1.439549 |
| N | -0.659248 | -3.256367 | -5.385924 | O | 0.641188  | 1.195133  | -3.521843 |
| C | -0.263002 | -4.578002 | -5.929968 | O | 2.055463  | -0.002126 | 1.799676  |
| C | -1.591046 | -5.167894 | -6.422288 | C | 0.834300  | 1.148175  | 0.008890  |
| C | -2.397461 | -3.930185 | -6.845020 | C | 2.081121  | 0.309863  | 0.418457  |
| C | -2.035297 | -2.892746 | -5.776120 | C | -0.436760 | 0.301900  | 0.038859  |
| C | 3.592014  | 3.261035  | -2.323009 | C | -0.922385 | -0.185167 | 1.268516  |
| C | 4.953266  | 2.537971  | -2.259643 | C | -1.143320 | -0.021872 | -1.128970 |
| O | 6.001921  | 3.178862  | -2.419506 | C | -2.055015 | -0.988645 | 1.329137  |
| C | 2.433920  | 2.649755  | -3.129761 | C | -2.276945 | -0.825734 | -1.089832 |
| C | 1.745435  | 1.339202  | -2.685581 | C | -2.719600 | -1.307450 | 0.142382  |
| O | 1.019257  | 1.900665  | -1.188527 | O | -0.408647 | 3.945796  | 2.603167  |
| O | 2.423236  | 0.284937  | -2.438133 | N | -3.891136 | -2.172017 | 0.184241  |
| N | 4.951391  | 1.214211  | -1.963246 | O | -4.340128 | -2.508346 | 1.283256  |
| C | 6.198011  | 0.446983  | -1.951992 | O | -4.384598 | -2.537935 | -0.892365 |
| C | 5.986462  | -1.059590 | -1.710026 | C | -6.610888 | -6.478216 | -1.615135 |
| C | 5.907973  | -1.491406 | -0.272343 | C | -5.534992 | -5.316105 | -3.580689 |
| C | 4.843548  | -2.083322 | 0.365057  | C | 2.157520  | -1.602855 | 7.184857  |
| C | 6.973969  | -1.436992 | 0.701083  | S | 1.579232  | -2.793184 | 8.449460  |
| C | 6.470446  | -2.009175 | 1.906990  | H | 3.970437  | 0.366068  | -4.622232 |
| C | 8.306477  | -0.984180 | 0.675197  | H | 2.999841  | 0.842063  | -6.031954 |
| N | 5.171541  | -2.392010 | 1.668283  | H | 2.587507  | -3.457947 | -2.505325 |
| C | 7.252002  | -2.122568 | 3.063173  | H | 1.240961  | -2.381064 | -2.141552 |
| C | 9.086035  | -1.098321 | 1.821101  | H | 2.204384  | -5.894272 | -2.857251 |
| C | 8.562344  | -1.659429 | 3.005103  | H | -1.051110 | -3.263119 | -1.893752 |
| C | -2.844034 | -4.946040 | 5.150024  | H | 0.770085  | -7.850459 | -2.366691 |
| C | -2.157564 | -4.987846 | 3.933401  | H | -2.486822 | -5.208211 | -1.396570 |
| C | -2.610143 | -3.877792 | 6.022001  | H | -1.586250 | -7.521194 | -1.638312 |
| C | -1.239517 | -3.995055 | 3.592587  | H | 1.873022  | -3.604272 | -4.875231 |
| C | -1.692005 | -2.880104 | 5.697376  | H | -1.443552 | -5.888541 | -7.230516 |
| C | -0.981726 | -2.933806 | 4.483209  | H | -2.094432 | -5.682153 | -5.596389 |
| O | -0.078815 | -1.967181 | 4.219376  | H | -2.068312 | -3.583803 | -7.831047 |
| C | 0.565004  | -6.690992 | 7.323000  | H | -3.473578 | -4.113871 | -6.893787 |
| C | 0.778918  | -5.449949 | 8.197636  | H | -2.061676 | -1.860979 | -6.133211 |
| C | 1.393493  | -4.296200 | 7.403357  | H | -2.696673 | -2.959889 | -4.903230 |
| C | -7.987968 | -3.357984 | -3.557978 | H | 0.207305  | -5.194669 | -5.162484 |
| C | -7.927058 | -4.734815 | -2.886697 | H | 2.767651  | 2.451336  | -4.155008 |
| C | -6.525306 | -5.170051 | -2.415019 | H | 1.651306  | 3.409760  | -3.212937 |
| C | 3.594995  | -6.054992 | 2.870990  | H | 3.252200  | 3.410966  | -1.290466 |
| C | 3.561295  | -5.032681 | 3.824244  | H | 6.833524  | -1.573561 | -2.184534 |
| C | 2.888999  | -5.871382 | 1.674700  | H | 5.094061  | -1.393270 | -2.252601 |
| C | 2.830433  | -3.861455 | 3.603134  | H | 3.860338  | -2.320935 | -0.014140 |
| C | 2.156170  | -4.710676 | 1.440702  | H | 8.725605  | -0.552380 | -0.229577 |
| C | 2.081183  | -3.668424 | 2.406955  | H | 10.115006 | -0.749686 | 1.807786  |
| O | 1.335510  | -2.601467 | 2.201037  | H | 6.847875  | -2.560296 | 3.971245  |
| C | -5.292962 | 7.357012  | 1.357005  | H | 9.193565  | -1.733021 | 3.886252  |
| C | -4.140132 | 8.219957  | 1.878665  | H | 6.870921  | 0.863238  | -1.194074 |
| C | -2.809280 | 7.749647  | 1.278529  | H | -2.337690 | -5.802598 | 3.236487  |
| O | -2.595872 | 6.475820  | 1.413083  | H | -3.143996 | -3.821104 | 6.967381  |
| O | -2.058632 | 8.548864  | 0.705024  | H | -0.708831 | -4.024946 | 2.647532  |



H -1.500358 -2.054915 6.376728  
H 0.499428 -2.215750 3.400402  
H -0.181486 -5.127965 8.618174  
H 2.377229 -4.578074 7.012720  
H 0.751705 -4.036500 6.556766  
H 1.508310 -7.037007 6.886130  
H -8.323480 -5.496365 -3.574663  
H -6.139552 -4.389907 -1.743384  
H -7.581123 -2.581399 -2.900177  
H 2.904949 -6.648587 0.913111  
H 4.109134 -5.146025 4.757857  
H 1.598028 -4.586894 0.516419  
H 2.792718 -3.085918 4.363531  
H 1.848858 -0.961147 1.910636  
H -4.293689 9.277271 1.642094  
H -4.079556 8.129885 2.971732  
H -5.387234 7.449741 0.268484  
H -6.122953 4.390463 6.042049  
H -7.100620 4.033706 4.602106  
H -5.429681 5.795169 4.044790  
H 0.041059 2.151059 4.508921  
H -0.532357 3.119925 5.885709  
H -1.673737 2.593159 4.643381  
H -1.306577 5.558320 5.439896  
H -4.791692 3.902383 -2.764228  
H -5.130587 4.342578 -1.082401  
H -2.294401 2.636039 -2.945525  
H -0.395270 4.625915 0.246598  
H -0.091541 2.735688 -1.444702  
H -6.252920 7.653436 1.795172  
H -9.020984 -3.083343 -3.797030  
H 4.510490 -0.041005 -6.280042  
H 6.706570 0.588438 -2.915532  
H 3.817507 4.248001 -2.733326  
H 4.163842 -6.962724 3.048532  
H 0.145512 -7.515432 7.909041  
H -0.945453 6.284435 3.853559  
H -3.558272 -5.722251 5.408174  
H -2.636614 5.604465 0.153193  
H 0.458554 0.237946 -3.651428  
H -0.126124 -6.478022 6.500661  
H -2.910701 5.564389 2.995461  
H 2.443595 -0.976686 -3.621535  
H 4.045814 0.722836 -2.003550  
H 4.548632 -2.848749 2.325791  
H 2.961362 0.925981 0.202544  
H 0.731540 1.890132 0.817388  
H -0.392173 0.047079 2.183183  
H -0.802298 0.362698 -2.078381  
H -2.413851 -1.379595 2.272332  
H -2.811772 -1.081008 -1.995592  
H 2.150613 -0.588191 -0.198245  
H -4.603324 5.580439 -2.228463  
H -5.119040 6.305079 1.586280  
H -5.052015 4.336672 3.149048  
H -7.418119 -3.331095 -4.492282  
H 0.447558 -4.440900 -6.754437  
H 0.655657 4.545657 4.209620  
H -1.329859 3.725569 2.398566  
H -5.812615 2.926255 5.108921  
H -8.598985 -4.733642 -2.017790  
H -5.627593 -6.777965 -1.236511  
H -7.283430 -6.376686 -0.756067

H -6.989877 -7.297240 -2.239846  
H -5.402756 -4.377172 -4.127407  
H -4.548304 -5.626558 -3.219521  
H -5.881547 -6.074144 -4.295248  
H 2.218802 -0.625291 7.667870  
H 3.148978 -1.877557 6.815559  
H 1.452486 -1.551830 6.351131  
H 1.426159 -5.699941 9.047761

**Prod-R-C1-r1**

C 3.207378 -0.532810 -5.949539  
C 2.129297 -1.616468 -5.912111  
O 1.690563 -2.128242 -6.944768  
N 1.662543 -1.975996 -4.675715  
C 0.469606 -2.814690 -4.546744  
C -0.770653 -1.979971 -4.923475  
O -0.842015 -0.784666 -4.563100  
C 0.373447 -3.366501 -3.101250  
C -0.622044 -4.497234 -2.946278  
C -0.247292 -5.812376 -3.263217  
C -1.932026 -4.264251 -2.506547  
C -1.158737 -6.863874 -3.155421  
C -2.847168 -5.314063 -2.398841  
C -2.464707 -6.616457 -2.724716  
N -1.766897 -2.560163 -5.617251  
C -1.820779 -3.937188 -6.182352  
C -3.284430 -4.075648 -6.616370  
C -3.675447 -2.646233 -7.021745  
C -2.967000 -1.774820 -5.977950  
C 4.226273 2.324575 -2.502651  
C 5.088723 1.153282 -2.990660  
O 5.577599 1.176782 -4.125712  
C 2.934025 2.471076 -3.331219  
C 2.042179 1.241774 -3.339955  
O 1.187817 1.310906 0.098923  
O 2.313045 0.188845 -2.779031  
N 5.286410 0.127733 -2.116895  
C 5.994886 -1.097558 -2.486062  
C 5.134002 -2.377632 -2.484427  
C 4.939517 -3.008311 -1.135635  
C 3.762646 -3.157045 -0.438130  
C 5.962124 -3.635894 -0.331059  
C 5.323075 -4.136447 0.840935  
C 7.345377 -3.846068 -0.487962  
N 3.987931 -3.822645 0.747804  
C 6.025354 -4.822294 1.839866  
C 8.045489 -4.526073 0.502395  
C 7.391324 -5.008055 1.656328  
C -3.693229 -4.389138 5.036511  
C -2.942383 -4.330874 3.860146  
C -3.565313 -3.357962 5.973166  
C -2.070661 -3.269430 3.611031  
C -2.696813 -2.292411 5.742157  
C -1.938529 -2.240952 4.560288  
O -1.105700 -1.181095 4.394025  
C -0.749305 -7.124409 6.836771  
C 0.025776 -6.066157 7.631179  
C 0.397070 -4.858088 6.767319  
C -8.763605 -0.884022 -3.137773  
C -8.309683 -2.103472 -3.948321  
C -7.793597 -3.284968 -3.103289  
C 2.049489 -7.000745 2.193153  
C 2.080318 -5.851574 2.988636

|   |           |           |           |   |           |           |           |
|---|-----------|-----------|-----------|---|-----------|-----------|-----------|
| C | 1.340811  | -6.954406 | 0.984885  | H | -7.506135 | -1.792716 | -4.629311 |
| C | 1.431233  | -4.678445 | 2.592636  | H | -6.988881 | -2.896972 | -2.464318 |
| C | 0.687007  | -5.798085 | 0.576298  | H | -9.637622 | -1.105864 | -2.516878 |
| C | 0.709273  | -4.607099 | 1.361129  | H | 1.301679  | -7.837819 | 0.349875  |
| O | 0.099752  | -3.524163 | 0.952689  | H | 2.622340  | -5.862562 | 3.932915  |
| C | -2.972479 | 8.358310  | 2.084205  | H | 0.143021  | -5.772250 | -0.363410 |
| C | -1.723808 | 8.965536  | 2.723617  | H | 1.460209  | -3.793226 | 3.222042  |
| C | -0.393499 | 8.349398  | 2.253373  | H | 0.312290  | -2.366453 | 1.751148  |
| O | -0.395948 | 7.063962  | 2.074901  | H | -1.680007 | 10.046571 | 2.557945  |
| O | 0.595967  | 9.084760  | 2.129263  | H | -1.763989 | 8.817167  | 3.812567  |
| C | -3.309476 | 5.606778  | 4.726609  | H | -2.991596 | 8.542297  | 1.003425  |
| C | -1.909944 | 5.236735  | 5.243706  | H | -4.300733 | 5.192114  | 6.611319  |
| O | -1.732758 | 4.835305  | 6.398833  | H | -5.402181 | 5.276044  | 5.218995  |
| C | -4.414892 | 4.943518  | 5.554033  | H | -3.405370 | 6.699308  | 4.776218  |
| N | -0.908254 | 5.377772  | 4.340396  | H | 0.905816  | 3.883450  | 2.991012  |
| C | 0.515662  | 5.195642  | 4.652438  | H | 0.853538  | 1.715154  | 4.271534  |
| C | 1.053330  | 3.875838  | 4.078959  | H | 0.554551  | 2.597603  | 5.774741  |
| C | 0.413371  | 2.626139  | 4.688775  | H | -0.663060 | 2.596109  | 4.495641  |
| C | -3.152030 | 5.657936  | -1.401998 | H | 0.601703  | 5.177067  | 5.743884  |
| C | -1.869520 | 4.987808  | -1.020251 | H | -3.669278 | 5.059561  | -2.155646 |
| C | -1.286548 | 3.827524  | -1.478033 | H | -3.823525 | 5.773365  | -0.543385 |
| N | -0.989942 | 5.472997  | -0.069345 | H | -1.664454 | 3.147293  | -2.228494 |
| C | 0.050564  | 4.611545  | 0.006675  | H | 0.875769  | 4.768301  | 0.685452  |
| N | -0.086609 | 3.597316  | -0.833436 | H | 0.718285  | 2.101975  | -0.270400 |
| O | 0.935788  | 1.410610  | -4.072994 | H | -3.888168 | 8.786964  | 2.506608  |
| O | 0.492248  | -1.487371 | 2.312562  | H | -9.034155 | -0.052254 | -3.797203 |
| H | 3.822319  | -0.487640 | -5.051645 | H | 3.840504  | -0.708803 | -6.820609 |
| H | 2.715619  | 0.436605  | -6.081926 | H | 6.385887  | -0.913275 | -3.488552 |
| H | 1.373698  | -3.722979 | -2.834377 | H | 4.816912  | 3.237088  | -2.619280 |
| H | 0.129203  | -2.547270 | -2.417564 | H | 2.560888  | -7.906665 | 2.504784  |
| H | 0.769555  | -6.012666 | -3.592220 | H | -1.013505 | -7.976405 | 7.471685  |
| H | -2.240814 | -3.256851 | -2.245146 | H | -4.371268 | -5.217685 | 5.218369  |
| H | -0.847557 | -7.875191 | -3.401256 | H | -1.056155 | 6.271320  | 0.579592  |
| H | -3.856974 | -5.112071 | -2.053610 | H | 0.412621  | 0.568729  | -4.122694 |
| H | -3.175050 | -7.433262 | -2.636363 | H | -1.675715 | -6.708132 | 6.426460  |
| H | 0.585050  | -3.643411 | -5.247621 | H | -1.085420 | 5.854912  | 3.452851  |
| H | -3.403715 | -4.804540 | -7.421831 | H | 1.895884  | -1.378284 | -3.884316 |
| H | -3.889279 | -4.406862 | -5.765268 | H | 4.727216  | 0.112468  | -1.275359 |
| H | -3.292470 | -2.420862 | -8.023227 | H | 3.260686  | -4.109693 | 1.397238  |
| H | -4.755763 | -2.481969 | -7.028898 | C | 0.336591  | 0.624364  | 0.993180  |
| H | -2.668546 | -0.793028 | -6.352082 | C | 1.182351  | -0.571319 | 1.497525  |
| H | -3.583347 | -1.621135 | -5.084991 | H | 2.040418  | -0.146837 | 2.037034  |
| H | -1.531849 | -4.679627 | -5.439126 | H | 0.081552  | 1.251224  | 1.864006  |
| H | 3.179710  | 2.695097  | -4.375179 | C | -0.971107 | 0.177820  | 0.361703  |
| H | 2.338012  | 3.313603  | -2.964428 | C | -2.095946 | -0.077602 | 1.163863  |
| H | 3.971775  | 2.217606  | -1.443870 | C | -1.076082 | 0.008579  | -1.025559 |
| H | 5.641780  | -3.096229 | -3.143058 | C | -3.297297 | -0.489863 | 0.600197  |
| H | 4.166506  | -2.164504 | -2.949272 | H | -2.026356 | 0.040166  | 2.240230  |
| H | 2.760338  | -2.848487 | -0.700058 | C | -2.268309 | -0.403030 | -1.611756 |
| H | 7.862621  | -3.487988 | -1.374131 | H | -0.210666 | 0.209068  | -1.644586 |
| H | 9.113097  | -4.692188 | 0.388110  | C | -3.367848 | -0.648891 | -0.786524 |
| H | 5.515896  | -5.200952 | 2.720814  | H | -4.167508 | -0.692022 | 1.211346  |
| H | 7.964033  | -5.536677 | 2.413128  | H | -2.339585 | -0.524791 | -2.685100 |
| H | 6.851273  | -1.231959 | -1.815353 | H | 1.573978  | -1.077651 | 0.605491  |
| H | -3.030641 | -5.121825 | 3.119818  | H | -2.982820 | 6.656670  | -1.821352 |
| H | -4.143676 | -3.382941 | 6.893166  | H | -3.000950 | 7.277312  | 2.233973  |
| H | -1.497324 | -3.244161 | 2.688989  | H | -3.393083 | 5.336075  | 3.668725  |
| H | -2.588083 | -1.490017 | 6.465704  | H | -7.962421 | -0.540264 | -2.474459 |
| H | -0.522007 | -1.289693 | 3.588241  | H | -1.138082 | -4.006503 | -7.038196 |
| H | -0.576021 | -5.731558 | 8.485280  | H | 2.136227  | 3.868833  | 4.251614  |
| H | 1.009196  | -5.170783 | 5.914730  | H | -4.373694 | 3.853779  | 5.463752  |
| H | -0.501852 | -4.370371 | 6.377499  | O | 1.257859  | 6.302720  | 4.183072  |
| H | -0.155037 | -7.501713 | 5.997406  | H | 0.920083  | 6.530143  | 3.287382  |

H 0.938082 -6.511369 8.047199  
S 1.349422 -3.625452 7.749137  
C 1.731639 -2.394160 6.450571  
H 2.279602 -1.582786 6.934618  
H 2.363605 -2.834045 5.674961  
H 0.821309 -1.991807 6.000053  
H -9.133858 -2.451375 -4.589013  
C -7.195764 -4.372583 -4.007304  
H -6.386745 -3.972441 -4.628925  
H -6.786258 -5.200441 -3.417573  
H -7.957185 -4.789592 -4.679137  
C -8.882145 -3.878593 -2.196741  
H -9.275867 -3.141589 -1.490174  
H -9.724521 -4.255145 -2.791745  
H -8.489318 -4.717410 -1.611450  
N -4.620705 -1.090513 -1.386331  
O -5.622622 -1.166178 -0.667237  
O -4.627876 -1.376332 -2.590443

**TS1-R-C2-r1**

C 3.016239 0.281834 -5.914390  
C 2.085579 -0.928571 -5.908606  
O 1.840117 -1.557728 -6.942482  
N 1.533493 -1.257450 -4.702749  
C 0.527849 -2.312599 -4.593440  
C -0.881841 -1.690709 -4.667906  
O -1.128287 -0.656484 -4.021255  
C 0.717322 -3.090196 -3.266028  
C -0.143435 -4.330423 -3.150994  
C 0.302458 -5.555308 -3.670693  
C -1.403149 -4.286062 -2.536833  
C -0.489610 -6.702140 -3.587833  
C -2.199644 -5.430186 -2.454116  
C -1.746379 -6.642043 -2.980403  
N -1.831520 -2.279271 -5.420343  
C -1.721938 -3.509527 -6.232728  
C -3.181240 -3.829361 -6.583161  
C -3.840219 -2.443329 -6.662926  
C -3.172384 -1.667373 -5.521321  
C 3.923804 2.973122 -2.306387  
C 5.115794 2.022230 -2.488225  
O 6.257895 2.486349 -2.584428  
C 2.486479 2.430308 -2.475406  
C 2.084366 1.256481 -1.557737  
O 1.817860 1.520835 -0.342833  
O 2.063189 0.089548 -2.059534  
N 4.876290 0.684774 -2.499835  
C 5.965921 -0.281437 -2.587592  
C 5.491788 -1.674707 -3.061654  
C 5.255636 -2.667570 -1.958829  
C 4.109187 -2.845777 -1.221122  
C 6.219392 -3.606192 -1.438493  
C 5.579879 -4.326453 -0.388080  
C 7.554410 -3.917176 -1.757308  
N 4.297724 -3.839221 -0.281039  
C 6.233494 -5.334216 0.332005  
C 8.207587 -4.914298 -1.042211  
C 7.552466 -5.616065 -0.007257  
C -3.137885 -4.881800 4.978120  
C -2.553781 -4.680329 3.725152  
C -2.803547 -4.017396 6.026217  
C -1.646568 -3.640537 3.511801  
C -1.897339 -2.976088 5.829609  
C -1.307726 -2.782266 4.569722  
O -0.426776 -1.753482 4.441794  
C 0.084021 -7.476156 6.487598  
C 0.950762 -6.493954 7.284485  
C 1.332525 -5.268457 6.451494  
C -8.774455 -1.266103 -2.765767  
C -8.362181 -2.408386 -3.701609  
C -7.553686 -3.534900 -3.028058  
C 2.690862 -6.800940 1.780095  
C 2.750170 -5.586539 2.468727  
C 1.817128 -6.917617 0.692716  
C 1.957030 -4.499400 2.082825  
C 1.019909 -5.846841 0.296355  
C 1.082136 -4.622909 0.987016  
O 0.288056 -3.614315 0.560165  
C -3.570750 8.052621 2.918025  
C -2.036832 8.116523 2.896382  
C -1.496844 7.211801 1.781632  
O -1.353918 5.959088 2.100023  
O -1.297836 7.689770 0.655180  
C -3.584399 5.109426 5.367613  
C -2.122291 4.935584 5.806485  
O -1.854722 4.617442 6.972626  
C -4.409820 3.856346 5.702397  
N -1.174964 5.137182 4.855940  
C 0.256305 5.026690 5.145830  
C 1.092027 4.483581 3.974382  
C 0.600255 3.129380 3.455441  
C -3.656655 5.591024 -0.743971  
C -2.525086 4.695717 -1.120204  
C -2.261876 3.937415 -2.237668  
N -1.450808 4.488119 -0.282447  
C -0.600280 3.636554 -0.907466  
N -1.056876 3.276392 -2.100379  
O -0.097790 2.017060 -4.557612  
O 0.630308 -1.408494 1.970546  
H 3.637292 0.340001 -5.017590  
H 2.400466 1.187527 -5.951494  
H 1.774539 -3.367902 -3.210869  
H 0.517335 -2.410884 -2.432219  
H 1.282562 -5.610150 -4.138443  
H -1.756820 -3.351601 -2.110910  
H -0.123536 -7.641586 -3.992436  
H -3.171094 -5.375680 -1.971029  
H -2.363758 -7.533064 -2.911635  
H 0.693421 -2.979874 -5.440494  
H -3.263876 -4.405051 -7.508423  
H -3.633571 -4.416114 -5.776116  
H -3.609910 -1.971090 -7.624416  
H -4.927476 -2.476649 -6.557008  
H -3.077404 -0.596085 -5.712491  
H -3.708260 -1.786683 -4.572427  
H -1.241670 -4.311348 -5.670461  
H 2.305159 2.122574 -3.506106  
H 1.803145 3.259083 -2.273906  
H 4.037859 3.397913 -1.300943  
H 6.254310 -2.078919 -3.736611  
H 4.587790 -1.559389 -3.670022  
H 3.167197 -2.320463 -1.293259  
H 8.070205 -3.383688 -2.551520  
H 9.238693 -5.159804 -1.280767  
H 5.723431 -5.876305 1.122478  
H 8.087799 -6.391368 0.533655

H 6.476767 -0.372750 -1.619953  
H -2.803436 -5.338006 2.896888  
H -3.250749 -4.153186 7.007289  
H -1.205733 -3.494279 2.531672  
H -1.633205 -2.302440 6.638966  
H -0.014948 -1.720770 3.539585  
H 0.409917 -6.169338 8.181922  
H 1.903518 -5.569614 5.566463  
H 0.434318 -4.742646 6.112949  
H 0.612110 -7.838593 5.598747  
H -7.756669 -1.994014 -4.518827  
H -6.675166 -3.067732 -2.559997  
H -9.481116 -1.601026 -1.999081  
H 1.758053 -7.853144 0.143085  
H 3.423699 -5.472820 3.313912  
H 0.345659 -5.932073 -0.549181  
H 2.009605 -3.557813 2.620753  
H 0.432175 -2.771619 1.085019  
H -1.710505 9.144204 2.708358  
H -1.636502 7.798439 3.864509  
H -3.982219 8.427302 1.974693  
H -4.314699 3.616048 6.764230  
H -5.468063 4.012691 5.472228  
H -3.984558 5.976002 5.906732  
H 1.256978 2.786022 2.651064  
H 0.595560 2.376301 4.251619  
H -0.416029 3.209354 3.057112  
H 0.357869 4.373729 6.017173  
H -4.371914 5.663349 -1.567797  
H -4.195672 5.217824 0.135469  
H -2.867901 3.830802 -3.127511  
H 0.317228 3.280764 -0.458823  
H -0.329805 2.448545 -3.706168  
H -3.986716 8.658215 3.730377  
H -9.260082 -0.459184 -3.325464  
H 3.643943 0.237095 -6.804688  
H 6.701342 0.129713 -3.286054  
H 4.083934 3.799651 -3.004641  
H 3.309723 -7.638685 2.085149  
H -0.183636 -8.346176 7.096059  
H 0.665806 6.008225 5.422203  
H -3.845193 -5.690441 5.134042  
H -1.311935 4.987611 0.618326  
H -0.351931 1.091684 -4.405726  
H -0.843982 -7.000529 6.152536  
H -1.438331 5.446064 3.912443  
H 1.675614 -0.651421 -3.891070  
H 3.926361 0.331453 -2.400511  
H 3.605826 -4.142809 0.391538  
C 0.133514 -0.144644 1.514228  
C 1.428873 -0.220345 0.844989  
H 2.304563 0.072154 1.401102  
H 0.083795 0.587207 2.326217  
C -1.180746 -0.208371 0.780957  
C -1.284378 -0.234138 -0.614675  
C -2.347420 -0.282760 1.561492  
C -2.531423 -0.346627 -1.228430  
H -0.401362 -0.158948 -1.239155  
C -3.597263 -0.396026 0.968592  
H -2.267913 -0.260146 2.644218  
C -3.667699 -0.432508 -0.426165  
H -2.603186 -0.364203 -2.308133  
H -4.502039 -0.458704 1.558856

H 1.540612 -0.795377 -0.060011  
H -3.292164 6.595245 -0.504019  
H -3.922364 7.026277 3.048445  
H -3.643011 5.329634 4.298475  
H -7.900870 -0.847484 -2.256223  
H -1.128041 -3.311092 -7.134023  
H 2.106590 4.352936 4.375063  
O 1.226815 5.431527 2.924106  
H 0.336765 5.590152 2.538122  
H -4.062081 2.992931 5.126138  
H -9.254567 -2.843544 -4.176137  
C -7.051547 -4.541114 -4.073830  
H -6.446372 -4.048816 -4.843533  
H -6.436097 -5.321936 -3.613052  
H -7.891467 -5.035977 -4.577974  
C -8.349968 -4.255062 -1.929742  
H -8.657702 -3.573379 -1.131305  
H -9.255655 -4.716741 -2.344148  
H -7.752824 -5.051214 -1.471407  
H 1.860181 -6.999112 7.632615  
C 2.640785 -2.792800 6.183648  
H 3.193339 -1.990911 6.677923  
H 3.241673 -3.177403 5.355424  
H 1.696204 -2.396941 5.802424  
S 2.351733 -4.094587 7.436745  
N -4.979057 -0.566658 -1.060414  
O -5.978996 -0.564638 -0.335983  
O -5.028602 -0.681341 -2.289015

**Int1-R-C2-r1**

C 2.746706 0.114888 -6.069293  
C 1.821431 -1.100182 -6.038188  
O 1.676395 -1.832879 -7.020530  
N 1.170470 -1.310943 -4.856212  
C 0.191117 -2.378892 -4.683802  
C -1.218933 -1.762650 -4.613816  
O -1.424737 -0.784779 -3.875168  
C 0.496760 -3.220145 -3.417886  
C -0.283049 -4.517544 -3.361169  
C 0.218029 -5.673466 -3.980313  
C -1.527599 -4.594590 -2.720673  
C -0.504658 -6.867597 -3.964092  
C -2.254996 -5.786382 -2.702683  
C -1.746209 -6.927113 -3.326429  
N -2.212329 -2.301343 -5.350914  
C -2.156823 -3.468981 -6.258584  
C -3.636882 -3.812277 -6.469013  
C -4.332021 -2.443029 -6.403213  
C -3.561629 -1.701743 -5.302283  
C 3.878874 2.743683 -2.478894  
C 4.998644 1.730618 -2.749642  
O 6.139446 2.149631 -2.966453  
C 2.375611 2.332223 -2.447067  
C 1.975185 1.072488 -1.692873  
O 1.757087 1.223209 -0.377586  
O 1.878939 -0.016430 -2.252377  
N 4.724584 0.404988 -2.659154  
C 5.770094 -0.593193 -2.837687  
C 5.298096 -2.022803 -2.532665  
C 5.177209 -2.375016 -1.077930  
C 4.035050 -2.743563 -0.408280  
C 6.252715 -2.463327 -0.117242  
C 5.676430 -2.888488 1.116147

|   |           |           |           |   |           |           |           |
|---|-----------|-----------|-----------|---|-----------|-----------|-----------|
| C | 7.642791  | -2.249460 | -0.173817 | H | 1.999267  | 2.175365  | -3.458985 |
| N | 4.324017  | -3.034859 | 0.908789  | H | 1.821879  | 3.176940  | -2.034098 |
| C | 6.445347  | -3.095333 | 2.267632  | H | 4.146683  | 3.199103  | -1.517959 |
| C | 8.409259  | -2.455352 | 0.968161  | H | 6.025895  | -2.694563 | -3.007608 |
| C | 7.815634  | -2.873129 | 2.177837  | H | 4.344851  | -2.209209 | -3.043108 |
| C | -3.286128 | -4.845138 | 4.984255  | H | 3.017504  | -2.830098 | -0.761362 |
| C | -2.556506 | -4.683941 | 3.801628  | H | 8.116597  | -1.933156 | -1.099110 |
| C | -3.202561 | -3.852659 | 5.966900  | H | 9.482786  | -2.292512 | 0.931137  |
| C | -1.752271 | -3.559770 | 3.593009  | H | 5.986641  | -3.420012 | 3.197028  |
| C | -2.407109 | -2.724874 | 5.773970  | H | 8.439053  | -3.024940 | 3.054427  |
| C | -1.673869 | -2.567730 | 4.585024  | H | 6.617918  | -0.322717 | -2.200973 |
| O | -0.910385 | -1.453009 | 4.466848  | H | -2.607067 | -5.443105 | 3.025497  |
| C | -0.133669 | -7.583533 | 6.381834  | H | -3.762083 | -3.955221 | 6.893077  |
| C | 0.385596  | -6.473773 | 7.304077  | H | -1.185788 | -3.446955 | 2.672400  |
| C | 0.855815  | -5.247246 | 6.517925  | H | -2.338998 | -1.950680 | 6.532097  |
| C | -8.997710 | -0.947209 | -2.565519 | H | -0.434756 | -1.401347 | 3.596485  |
| C | -8.778424 | -2.313252 | -3.225111 | H | -0.405218 | -6.175130 | 8.002979  |
| C | -8.150999 | -3.382458 | -2.308502 | H | 1.650140  | -5.525261 | 5.816500  |
| C | 2.354242  | -6.992517 | 1.599492  | H | 0.030090  | -4.818275 | 5.941692  |
| C | 2.377042  | -5.992665 | 2.577073  | H | 0.644671  | -7.918508 | 5.687628  |
| C | 1.773836  | -6.690969 | 0.359893  | H | -8.125261 | -2.181278 | -4.098269 |
| C | 1.842554  | -4.723649 | 2.333609  | H | -7.220854 | -2.959915 | -1.902072 |
| C | 1.243023  | -5.432994 | 0.098991  | H | -9.709417 | -1.002008 | -1.735315 |
| C | 1.261477  | -4.391192 | 1.073218  | H | 1.737948  | -7.451220 | -0.418448 |
| O | 0.784918  | -3.203745 | 0.795063  | H | 2.818177  | -6.200719 | 3.550388  |
| C | -3.227797 | 8.107805  | 2.997196  | H | 0.796726  | -5.214135 | -0.866302 |
| C | -1.794924 | 8.189757  | 2.467767  | H | 1.845938  | -3.967422 | 3.116357  |
| C | -1.090347 | 6.828581  | 2.376141  | H | 0.700132  | -1.995460 | 1.681763  |
| O | -1.840058 | 5.800486  | 2.266513  | H | -1.792962 | 8.618052  | 1.455069  |
| O | 0.168055  | 6.806981  | 2.399717  | H | -1.177282 | 8.857591  | 3.077720  |
| C | -3.292405 | 5.153064  | 5.432716  | H | -3.818866 | 7.410607  | 2.400590  |
| C | -1.827554 | 5.025652  | 5.886363  | H | -4.023498 | 3.613876  | 6.791912  |
| O | -1.531295 | 5.037778  | 7.088048  | H | -5.143501 | 3.995500  | 5.470287  |
| C | -4.087886 | 3.868528  | 5.729787  | H | -3.721286 | 5.991430  | 5.991807  |
| N | -0.916924 | 4.878414  | 4.890304  | H | 1.598315  | 1.852264  | 3.773572  |
| C | 0.532591  | 4.908408  | 5.092298  | H | 1.424830  | 2.269459  | 5.486481  |
| C | 1.273213  | 3.960667  | 4.133916  | H | -0.005234 | 2.234529  | 4.433322  |
| C | 1.057826  | 2.490237  | 4.478791  | H | 0.737082  | 4.642420  | 6.132129  |
| C | -3.531306 | 5.673388  | -0.671500 | H | -4.215792 | 5.716125  | -1.522743 |
| C | -2.370808 | 4.792912  | -0.992484 | H | -4.089269 | 5.307217  | 0.196526  |
| C | -1.999284 | 4.120468  | -2.134283 | H | -2.513852 | 4.086147  | -3.085109 |
| N | -1.382353 | 4.514104  | -0.073695 | H | 0.392110  | 3.330323  | -0.157582 |
| C | -0.476973 | 3.707322  | -0.676259 | H | -0.359449 | 2.351197  | -3.476621 |
| N | -0.813437 | 3.442433  | -1.932001 | H | -3.713810 | 9.090045  | 2.969597  |
| O | -0.229655 | 1.848433  | -4.309744 | H | -9.393100 | -0.223516 | -3.286552 |
| O | 0.578156  | -1.121013 | 2.227329  | H | 3.286463  | 0.120636  | -7.015848 |
| H | 3.456114  | 0.098781  | -5.237182 | H | 6.138527  | -0.551724 | -3.871943 |
| H | 2.149832  | 1.028474  | -5.977636 | H | 3.986906  | 3.533227  | -3.226437 |
| H | 1.569476  | -3.436681 | -3.432878 | H | 2.772923  | -7.974719 | 1.797154  |
| H | 0.301007  | -2.608374 | -2.532253 | H | -0.463735 | -8.451983 | 6.961154  |
| H | 1.186044  | -5.636075 | -4.473898 | H | 0.895760  | 5.931332  | 4.926057  |
| H | -1.925470 | -3.715106 | -2.224686 | H | -3.908943 | -5.721670 | 5.133697  |
| H | -0.095610 | -7.751944 | -4.444454 | H | -1.379972 | 4.871571  | 0.902837  |
| H | -3.214334 | -5.823682 | -2.194794 | H | -0.606628 | 0.971647  | -4.121272 |
| H | -2.307948 | -7.856478 | -3.308975 | H | -0.983239 | -7.232938 | 5.786051  |
| H | 0.293179  | -3.008722 | -5.568695 | H | -1.237080 | 4.976200  | 3.925632  |
| H | -3.805758 | -4.342238 | -7.409827 | H | 1.274059  | -0.640629 | -4.099580 |
| H | -3.983553 | -4.452477 | -5.650443 | H | 3.768349  | 0.077863  | -2.611634 |
| H | -4.220520 | -1.918969 | -7.358967 | H | 3.660951  | -3.454461 | 1.550625  |
| H | -5.399931 | -2.513102 | -6.181817 | C | 0.407698  | 0.006943  | 1.370684  |
| H | -3.496058 | -0.622978 | -5.464557 | C | 1.620704  | 0.004822  | 0.421543  |
| H | -4.000650 | -1.856091 | -4.309772 | H | 2.521973  | -0.049382 | 1.035795  |
| H | -1.597638 | -4.290856 | -5.809701 | H | 0.462083  | 0.900335  | 2.000692  |

C -0.954842 -0.002286 0.685291  
C -1.836025 1.073802 0.861767  
C -1.372010 -1.109955 -0.072193  
C -3.104139 1.068579 0.285277  
H -1.529050 1.926396 1.458197  
C -2.632246 -1.129192 -0.656801  
H -0.719451 -1.974042 -0.165709  
C -3.483656 -0.038419 -0.472972  
H -3.786726 1.898051 0.415325  
H -2.971518 -1.972689 -1.242120  
H 1.580232 -0.856645 -0.240485  
H -3.213649 6.696142 -0.439925  
H -3.246663 7.757251 4.032778  
H -3.340892 5.390934 4.367130  
H -8.055182 -0.547507 -2.173964  
H -1.671899 -3.190460 -7.203027  
H 2.347958 4.188749 4.255587  
O 0.879498 4.158105 2.780929  
H 0.717407 5.121657 2.614442  
H -3.697658 3.023540 5.153585  
N -4.812841 -0.070756 -1.080847  
O -5.582690 0.868584 -0.863143  
O -5.111241 -1.043315 -1.784852  
H -9.733355 -2.695428 -3.615935  
C -7.786812 -4.637480 -3.115052  
H -7.100679 -4.399452 -3.935657  
H -7.304511 -5.391939 -2.483680  
H -8.682921 -5.095596 -3.553033  
C -9.061632 -3.749227 -1.127049  
H -9.286257 -2.883846 -0.496232  
H -10.015062 -4.160499 -1.483156  
H -8.591209 -4.506703 -0.490429  
S 1.509269 -3.955148 7.654426  
H 1.213849 -6.856816 7.913245  
C 1.977445 -2.663498 6.446264  
H 1.107953 -2.300369 5.893171  
H 2.407245 -1.837144 7.016644  
H 2.731325 -3.040965 5.750417

**TS2-R-C2-r1**

C 3.019700 -0.190000 -5.955501  
C 1.999269 -1.333159 -5.916697  
O 1.694246 -1.953815 -6.942415  
N 1.468669 -1.601736 -4.694217  
C 0.511702 -2.680699 -4.480499  
C -0.925414 -2.134658 -4.471131  
O -1.208032 -1.128186 -3.796095  
C 0.832563 -3.454741 -3.176259  
C 0.160604 -4.811024 -3.118067  
C 0.762210 -5.923958 -3.726787  
C -1.078669 -4.989799 -2.488698  
C 0.141313 -7.173802 -3.713824  
C -1.705406 -6.237735 -2.474413  
C -1.098218 -7.334118 -3.089411  
N -1.869183 -2.773336 -5.199889  
C -1.725501 -3.984601 -6.054101  
C -3.179008 -4.377446 -6.343974  
C -3.918367 -3.030873 -6.361868  
C -3.246635 -2.241711 -5.231802  
C 3.900301 2.744999 -2.535798  
C 5.088942 1.775561 -2.701917  
O 6.199616 2.222443 -3.020419  
C 2.445225 2.304870 -2.880305

C 1.783367 1.046674 -2.240739  
O 1.460477 1.271159 -0.871405  
O 2.249612 -0.109028 -2.527624  
N 4.883806 0.470563 -2.404611  
C 5.936001 -0.525401 -2.569101  
C 5.474579 -1.949117 -2.221633  
C 5.381324 -2.271497 -0.757438  
C 4.248317 -2.604261 -0.054302  
C 6.477898 -2.367250 0.178227  
C 5.924707 -2.761908 1.432824  
C 7.869945 -2.182478 0.083802  
N 4.565266 -2.883405 1.260254  
C 6.718896 -2.967019 2.567271  
C 8.661568 -2.386769 1.209069  
C 8.090964 -2.774141 2.439696  
C -3.251801 -4.566700 5.211100  
C -2.577099 -4.546614 3.984906  
C -3.117810 -3.467317 6.066585  
C -1.779680 -3.460266 3.610947  
C -2.328160 -2.376134 5.707686  
C -1.650225 -2.360784 4.475637  
O -0.890439 -1.272170 4.198922  
C -0.051699 -7.055899 6.929400  
C 0.421168 -5.845822 7.744352  
C 0.829895 -4.675401 6.846625  
C -8.804901 -1.489800 -2.820800  
C -8.912680 -2.151528 -4.199074  
C -8.135436 -3.474189 -4.351493  
C 2.601801 -6.716902 2.211700  
C 2.445186 -5.587271 3.021170  
C 2.180424 -6.638497 0.878006  
C 1.887677 -4.406462 2.522593  
C 1.629347 -5.470680 0.363605  
C 1.461737 -4.301027 1.163596  
O 0.964459 -3.202104 0.655511  
C -3.629700 8.192896 2.247895  
C -2.103430 8.362579 2.231733  
C -1.504439 7.399070 1.206345  
O -1.361641 6.172385 1.623619  
O -1.273047 7.783604 0.052187  
C -3.674684 5.427899 4.896989  
C -2.216133 5.302709 5.363882  
O -1.958841 5.076766 6.552819  
C -4.501146 4.236834 5.411816  
N -1.259094 5.431809 4.409872  
C 0.167731 5.322278 4.718795  
C 0.994637 4.620665 3.630349  
C 0.460357 3.232810 3.271417  
C -3.687604 5.481295 -1.233795  
C -2.525416 4.561991 -1.397212  
C -2.232686 3.595045 -2.328696  
N -1.460759 4.568082 -0.519601  
C -0.579297 3.637922 -0.922154  
N -1.015820 3.025757 -2.018743  
O 0.301622 1.170156 -3.020126  
O 0.535520 -1.016715 1.892224  
H 3.359622 0.102904 -4.961790  
H 2.563747 0.675238 -6.447651  
H 1.918768 -3.586507 -3.147931  
H 0.560551 -2.849246 -2.307584  
H 1.728620 -5.807733 -4.211274  
H -1.551243 -4.145544 -1.997253  
H 0.627574 -8.022566 -4.186448

|   |           |           |           |                     |           |           |           |
|---|-----------|-----------|-----------|---------------------|-----------|-----------|-----------|
| H | -2.663568 | -6.352996 | -1.975899 | H                   | -0.121873 | 0.283708  | -3.066632 |
| H | -1.581729 | -8.306572 | -3.074935 | H                   | -0.914538 | -6.796152 | 6.306703  |
| H | 0.637326  | -3.356535 | -5.329101 | H                   | -1.512144 | 5.700854  | 3.453764  |
| H | -3.272621 | -4.938283 | -7.277363 | H                   | 1.742794  | -1.017970 | -3.890125 |
| H | -3.558340 | -5.005324 | -5.530366 | H                   | 3.914346  | 0.133462  | -2.337354 |
| H | -3.757553 | -2.525792 | -7.320981 | H                   | 3.906316  | -3.274589 | 1.923140  |
| H | -4.996083 | -3.130595 | -6.211049 | C                   | 0.257973  | 0.030463  | 0.960869  |
| H | -3.223903 | -1.162903 | -5.403782 | C                   | 1.454166  | 0.107587  | -0.019298 |
| H | -3.736136 | -2.408845 | -4.264787 | H                   | 2.358040  | 0.131727  | 0.600160  |
| H | -1.176394 | -4.769255 | -5.532931 | H                   | 0.221160  | 0.959489  | 1.538607  |
| H | 2.379905  | 2.124654  | -3.956207 | C                   | -1.105965 | -0.167229 | 0.309290  |
| H | 1.803305  | 3.166725  | -2.674091 | C                   | -2.060194 | 0.859937  | 0.327415  |
| H | 3.934220  | 3.085910  | -1.492124 | C                   | -1.453185 | -1.405980 | -0.257989 |
| H | 6.194598  | -2.632345 | -2.692716 | C                   | -3.321254 | 0.685829  | -0.234653 |
| H | 4.511663  | -2.145049 | -2.707844 | H                   | -1.816685 | 1.810838  | 0.788541  |
| H | 3.218402  | -2.673114 | -0.375772 | C                   | -2.706761 | -1.597718 | -0.823635 |
| H | 8.325063  | -1.887951 | -0.857986 | H                   | -0.742923 | -2.228165 | -0.225489 |
| H | 9.736869  | -2.245859 | 1.142435  | C                   | -3.624477 | -0.545859 | -0.814196 |
| H | 6.277923  | -3.268351 | 3.513108  | H                   | -4.056892 | 1.479201  | -0.229858 |
| H | 8.733377  | -2.925529 | 3.302661  | H                   | -2.989890 | -2.543728 | -1.265289 |
| H | 6.797225  | -0.243779 | -1.952461 | H                   | 1.487883  | -0.795984 | -0.626456 |
| H | -2.666200 | -5.389081 | 3.304009  | H                   | -3.346446 | 6.517097  | -1.137936 |
| H | -3.632580 | -3.456403 | 7.023792  | H                   | -3.908175 | 7.159676  | 2.466308  |
| H | -1.253808 | -3.458469 | 2.660167  | H                   | -3.729160 | 5.491161  | 3.806737  |
| H | -2.222415 | -1.521034 | 6.368275  | H                   | -7.762753 | -1.296704 | -2.548718 |
| H | -0.458169 | -1.298497 | 3.304721  | H                   | -1.184254 | -3.728244 | -6.973128 |
| H | -0.379047 | -5.522254 | 8.421331  | H                   | 2.000301  | 4.503399  | 4.056183  |
| H | 1.634861  | -4.978602 | 6.168461  | H                   | -9.970489 | -2.333924 | -4.440982 |
| H | -0.017469 | -4.339540 | 6.240804  | H                   | -4.151990 | 3.298511  | 4.969163  |
| H | 0.739939  | -7.421013 | 6.266073  | H                   | 1.269325  | -6.134504 | 8.377494  |
| H | -8.546753 | -1.447741 | -4.958937 | S                   | 1.426601  | -3.254526 | 7.852856  |
| H | -7.087553 | -3.272807 | -4.083677 | C                   | 1.891838  | -2.088730 | 6.521188  |
| H | -9.246235 | -2.111645 | -2.034754 | H                   | 2.267865  | -1.185625 | 7.006825  |
| H | 2.288691  | -7.504069 | 0.226587  | H                   | 2.684935  | -2.511176 | 5.898783  |
| H | 2.764154  | -5.622531 | 4.061465  | H                   | 1.031485  | -1.828643 | 5.900004  |
| H | 1.309710  | -5.425947 | -0.672887 | C                   | -8.167613 | -3.952695 | -5.810432 |
| H | 1.750507  | -3.545910 | 3.174458  | H                   | -7.584023 | -4.870535 | -5.943149 |
| H | 0.747928  | -1.907647 | 1.412018  | H                   | -9.195891 | -4.165438 | -6.129684 |
| H | -1.841004 | 9.388840  | 1.957842  | H                   | -7.761263 | -3.194346 | -6.489330 |
| H | -1.694733 | 8.150965  | 3.225260  | C                   | -8.657303 | -4.573040 | -3.413839 |
| H | -4.054448 | 8.454776  | 1.272923  | H                   | -8.573122 | -4.288345 | -2.360917 |
| H | -4.404641 | 4.155989  | 6.496920  | H                   | -9.713636 | -4.789653 | -3.619024 |
| H | -5.559326 | 4.357076  | 5.160517  | H                   | -8.095646 | -5.503998 | -3.549433 |
| H | -4.073573 | 6.364772  | 5.303487  | O                   | 1.177407  | 5.431386  | 2.474730  |
| H | 1.123515  | 2.768339  | 2.537002  | H                   | 0.296775  | 5.669641  | 2.113311  |
| H | 0.407262  | 2.582807  | 4.151506  | N                   | -4.934160 | -0.745537 | -1.422373 |
| H | -0.543621 | 3.300338  | 2.840593  | O                   | -5.749814 | 0.180250  | -1.379370 |
| H | 0.245933  | 4.773964  | 5.661115  | O                   | -5.172122 | -1.836225 | -1.956806 |
| H | -4.354999 | 5.408211  | -2.095740 |                     |           |           |           |
| H | -4.269018 | 5.241499  | -0.335877 |                     |           |           |           |
| H | -2.809524 | 3.277748  | -3.184635 | <b>Int2-R-C2-r1</b> |           |           |           |
| H | 0.343486  | 3.403698  | -0.415119 | C                   | 3.153723  | -0.283886 | -5.877048 |
| H | -0.369502 | 1.995584  | -2.561612 | C                   | 2.140875  | -1.433945 | -5.817021 |
| H | -4.096919 | 8.836496  | 3.000787  | O                   | 1.821727  | -2.057069 | -6.838101 |
| H | -9.335087 | -0.530990 | -2.809523 | N                   | 1.641717  | -1.712586 | -4.584540 |
| H | 3.869970  | -0.506670 | -6.564269 | C                   | 0.692381  | -2.799038 | -4.365988 |
| H | 6.292262  | -0.509588 | -3.609204 | C                   | -0.753376 | -2.282711 | -4.433154 |
| H | 4.138177  | 3.614369  | -3.152686 | O                   | -1.075281 | -1.252430 | -3.815084 |
| H | 3.037428  | -7.629418 | 2.607803  | C                   | 0.967918  | -3.495600 | -3.007654 |
| H | -0.346021 | -7.880559 | 7.586708  | C                   | 0.307357  | -4.852896 | -2.889083 |
| H | 0.600956  | 6.318968  | 4.881560  | C                   | 0.966390  | -6.003289 | -3.348840 |
| H | -3.869557 | -5.414960 | 5.488649  | C                   | -0.977747 | -4.997235 | -2.347825 |
| H | -1.358850 | 5.210879  | 0.313487  | C                   | 0.358674  | -7.257649 | -3.275811 |
|   |           |           |           | C                   | -1.591851 | -6.249534 | -2.274589 |

|   |           |           |           |   |           |           |           |
|---|-----------|-----------|-----------|---|-----------|-----------|-----------|
| C | -0.925329 | -7.384814 | -2.740108 | N | -1.065886 | 2.968561  | -2.103359 |
| N | -1.663032 | -2.977637 | -5.153494 | O | 0.457360  | 1.032775  | -3.021284 |
| C | -1.469684 | -4.226472 | -5.937272 | O | 0.538441  | -0.873409 | 1.962574  |
| C | -2.906199 | -4.685255 | -6.215044 | H | 3.438395  | 0.078317  | -4.889496 |
| C | -3.690502 | -3.367915 | -6.318712 | H | 2.718730  | 0.538217  | -6.454324 |
| C | -3.052764 | -2.485961 | -5.237808 | H | 2.052666  | -3.608870 | -2.921566 |
| C | 3.870811  | 2.794574  | -2.546486 | H | 0.648460  | -2.837868 | -2.194561 |
| C | 5.104412  | 1.871124  | -2.624629 | H | 1.968115  | -5.913114 | -3.761613 |
| O | 6.221683  | 2.368899  | -2.836287 | H | -1.497669 | -4.121018 | -1.974256 |
| C | 2.456096  | 2.280296  | -2.943604 | H | 0.890034  | -8.135832 | -3.631729 |
| C | 1.753157  | 1.018832  | -2.317092 | H | -2.586276 | -6.337380 | -1.846413 |
| O | 1.437394  | 1.317352  | -0.893242 | H | -1.398674 | -8.360498 | -2.679235 |
| O | 2.348993  | -0.138806 | -2.474984 | H | 0.862952  | -3.514897 | -5.173016 |
| N | 4.911771  | 0.555246  | -2.385612 | H | -2.972194 | -5.302540 | -7.114608 |
| C | 6.005962  | -0.409318 | -2.422408 | H | -3.271598 | -5.277513 | -5.368942 |
| C | 5.531903  | -1.839948 | -2.776486 | H | -3.542177 | -2.918621 | -7.307100 |
| C | 5.344423  | -2.754818 | -1.598234 | H | -4.765320 | -3.494303 | -6.165567 |
| C | 4.226237  | -2.899774 | -0.808946 | H | -3.057004 | -1.421112 | -5.483812 |
| C | 6.339548  | -3.642585 | -1.047925 | H | -3.549706 | -2.598425 | -4.266767 |
| C | 5.745613  | -4.298156 | 0.070713  | H | -0.898871 | -4.962254 | -5.370089 |
| C | 7.667758  | -3.959567 | -1.389080 | H | 2.456680  | 2.065998  | -4.016829 |
| N | 4.461700  | -3.823291 | 0.188617  | H | 1.776427  | 3.129903  | -2.812181 |
| C | 6.435778  | -5.248442 | 0.833694  | H | 3.842963  | 3.165323  | -1.512510 |
| C | 8.357647  | -4.899143 | -0.631137 | H | 6.277783  | -2.286543 | -3.444153 |
| C | 7.746650  | -5.537930 | 0.469950  | H | 4.607834  | -1.773395 | -3.359757 |
| C | -3.218012 | -4.463608 | 5.308102  | H | 3.269189  | -2.403197 | -0.879851 |
| C | -2.511447 | -4.456620 | 4.099427  | H | 8.150363  | -3.475355 | -2.234340 |
| C | -3.153198 | -3.329991 | 6.126210  | H | 9.383744  | -5.148438 | -0.887633 |
| C | -1.750787 | -3.351068 | 3.704963  | H | 5.955682  | -5.742455 | 1.673289  |
| C | -2.401192 | -2.218783 | 5.747411  | H | 8.309948  | -6.269918 | 1.042177  |
| C | -1.692372 | -2.217579 | 4.532843  | H | 6.536672  | -0.427870 | -1.460407 |
| O | -0.974859 | -1.104711 | 4.235700  | H | -2.545370 | -5.326001 | 3.447859  |
| C | 0.019401  | -6.789896 | 7.178205  | H | -3.693171 | -3.307409 | 7.069317  |
| C | 0.682220  | -5.574728 | 7.838116  | H | -1.199657 | -3.359833 | 2.767482  |
| C | 0.938883  | -4.443961 | 6.838153  | H | -2.349770 | -1.337015 | 6.378929  |
| C | -8.689674 | -1.843794 | -2.938891 | H | -0.508237 | -1.146206 | 3.360335  |
| C | -8.453821 | -3.202689 | -3.607792 | H | 0.044825  | -5.203827 | 8.650440  |
| C | -7.882066 | -4.293928 | -2.680843 | H | 1.595421  | -4.785630 | 6.030655  |
| C | 2.761399  | -6.532185 | 2.506189  | H | -0.000175 | -4.104009 | 6.390279  |
| C | 2.907906  | -5.269174 | 3.092199  | H | 0.650391  | -7.200601 | 6.382464  |
| C | 1.904454  | -6.651191 | 1.402335  | H | -7.758958 | -3.065138 | -4.447398 |
| C | 2.231533  | -4.152169 | 2.591169  | H | -6.968454 | -3.888933 | -2.223101 |
| C | 1.221515  | -5.552091 | 0.893944  | H | -9.430993 | -1.907028 | -2.135191 |
| C | 1.357674  | -4.248176 | 1.464365  | H | 1.770414  | -7.621782 | 0.927862  |
| O | 0.723274  | -3.222140 | 0.967915  | H | 3.566251  | -5.145153 | 3.950344  |
| C | -3.923050 | 8.166979  | 1.887179  | H | 0.563831  | -5.660997 | 0.036567  |
| C | -2.402508 | 8.381582  | 1.849564  | H | 2.358730  | -3.177527 | 3.056568  |
| C | -1.791519 | 7.395553  | 0.857509  | H | 0.686237  | -1.801197 | 1.542880  |
| O | -1.593091 | 6.192664  | 1.328005  | H | -2.172984 | 9.402082  | 1.529386  |
| O | -1.602369 | 7.726837  | -0.319543 | H | -1.977308 | 8.222515  | 2.845656  |
| C | -3.939925 | 5.495573  | 4.631602  | H | -4.362532 | 8.366143  | 0.904121  |
| C | -2.485778 | 5.454982  | 5.125633  | H | -4.655106 | 4.380479  | 6.349656  |
| O | -2.238977 | 5.326044  | 6.330653  | H | -5.800237 | 4.410186  | 4.990159  |
| C | -4.742287 | 4.344090  | 5.261595  | H | -4.367077 | 6.459143  | 4.933594  |
| N | -1.514146 | 5.541307  | 4.180644  | H | 1.076396  | 3.036876  | 2.357323  |
| C | -0.093562 | 5.504766  | 4.534783  | H | 0.347474  | 2.787714  | 3.957338  |
| C | 0.804307  | 4.865043  | 3.466210  | H | -0.628231 | 3.451256  | 2.637572  |
| C | 0.371237  | 3.448524  | 3.084210  | H | -0.013975 | 4.948240  | 5.472273  |
| C | -3.823483 | 5.335411  | -1.496559 | H | -4.472813 | 5.188301  | -2.362157 |
| C | -2.625237 | 4.455672  | -1.594173 | H | -4.404837 | 5.116972  | -0.593975 |
| C | -2.292931 | 3.466228  | -2.482653 | H | -2.827025 | 3.084290  | -3.337562 |
| N | -1.579667 | 4.534219  | -0.692075 | H | 0.263588  | 3.422816  | -0.497166 |
| C | -0.657801 | 3.627443  | -1.018662 | H | -0.523545 | 2.156790  | -2.520321 |



|                    |           |           |           |   |           |           |           |
|--------------------|-----------|-----------|-----------|---|-----------|-----------|-----------|
| H                  | -4.402810 | 8.834311  | 2.610717  | N | 1.634525  | -1.824878 | -4.692734 |
| H                  | -9.061534 | -1.112509 | -3.665289 | C | 0.660600  | -2.884100 | -4.463400 |
| H                  | 4.038903  | -0.631357 | -6.416570 | C | -0.770492 | -2.326200 | -4.533859 |
| H                  | 6.730569  | -0.052603 | -3.162985 | O | -1.055851 | -1.265535 | -3.950057 |
| H                  | 4.105177  | 3.657770  | -3.174484 | C | 0.933068  | -3.596677 | -3.113402 |
| H                  | 3.291928  | -7.394268 | 2.898934  | C | 0.288603  | -4.964955 | -3.027427 |
| H                  | -0.158869 | -7.584735 | 7.909827  | C | 0.926632  | -6.080467 | -3.593204 |
| H                  | 0.280040  | 6.520396  | 4.726277  | C | -0.956771 | -5.155300 | -2.414681 |
| H                  | -3.806758 | -5.327474 | 5.600378  | C | 0.334348  | -7.343444 | -3.555874 |
| H                  | -1.525963 | 5.226783  | 0.132839  | C | -1.555208 | -6.416607 | -2.375832 |
| H                  | 0.105171  | 0.119474  | -3.077083 | C | -0.912498 | -7.515164 | -2.949119 |
| H                  | -0.943607 | -6.518869 | 6.732174  | N | -1.704002 | -3.018966 | -5.227022 |
| H                  | -1.755374 | 5.755008  | 3.209697  | C | -1.540100 | -4.271700 | -6.016700 |
| H                  | 1.904365  | -1.106451 | -3.781154 | C | -2.986386 | -4.682450 | -6.316737 |
| H                  | 3.935189  | 0.200053  | -2.321817 | C | -3.727040 | -3.340396 | -6.421481 |
| H                  | 3.794557  | -4.079913 | 0.909359  | C | -3.079566 | -2.489192 | -5.322403 |
| C                  | 0.261022  | 0.134558  | 0.985995  | C | 3.960900  | 2.649600  | -2.677400 |
| C                  | 1.453798  | 0.196241  | -0.004102 | C | 5.142358  | 1.674679  | -2.853095 |
| H                  | 2.357096  | 0.237399  | 0.620241  | O | 6.234288  | 2.099243  | -3.256306 |
| H                  | 0.217036  | 1.081941  | 1.532677  | C | 2.527211  | 2.311634  | -3.174102 |
| C                  | -1.100440 | -0.092175 | 0.340067  | C | 1.728927  | 1.061057  | -2.739746 |
| C                  | -2.080878 | 0.910610  | 0.372455  | O | 1.204837  | 1.499575  | -0.957859 |
| C                  | -1.419165 | -1.330045 | -0.245300 | O | 2.277796  | -0.076024 | -2.643392 |
| C                  | -3.336177 | 0.717227  | -0.196560 | N | 4.962498  | 0.393465  | -2.452033 |
| H                  | -1.862542 | 1.856455  | 0.857023  | C | 6.033700  | -0.595500 | -2.562500 |
| C                  | -2.664715 | -1.539956 | -0.822093 | C | 5.580115  | -2.005071 | -2.154766 |
| H                  | -0.702156 | -2.145140 | -0.205887 | C | 5.441308  | -2.244437 | -0.678468 |
| C                  | -3.606436 | -0.509854 | -0.802076 | C | 4.285667  | -2.523863 | 0.011415  |
| H                  | -4.092995 | 1.490436  | -0.176855 | C | 6.510802  | -2.290759 | 0.291500  |
| H                  | -2.924311 | -2.485930 | -1.277837 | C | 5.919554  | -2.604255 | 1.551476  |
| H                  | 1.493595  | -0.732175 | -0.576548 | C | 7.906402  | -2.121865 | 0.225201  |
| H                  | -3.520009 | 6.385629  | -1.450182 | N | 4.564128  | -2.723534 | 1.348890  |
| H                  | -4.167851 | 7.138665  | 2.161969  | C | 6.680318  | -2.746912 | 2.717894  |
| H                  | -3.981234 | 5.444079  | 3.539732  | C | 8.664925  | -2.263810 | 1.382492  |
| H                  | -7.761944 | -1.449268 | -2.512766 | C | 8.057173  | -2.572416 | 2.617576  |
| H                  | -0.929157 | -4.002660 | -6.865310 | C | -3.212200 | -4.454600 | 5.241400  |
| H                  | 1.803242  | 4.809074  | 3.918728  | C | -2.540062 | -4.471456 | 4.013361  |
| H                  | -4.365151 | 3.373803  | 4.923232  | C | -3.068329 | -3.333218 | 6.066275  |
| O                  | 0.966664  | 5.696362  | 2.321837  | C | -1.736277 | -3.400968 | 3.607869  |
| H                  | -9.392893 | -3.568958 | -4.049268 | C | -2.272312 | -2.257408 | 5.675833  |
| C                  | -7.493696 | -5.539492 | -3.490744 | C | -1.597088 | -2.279298 | 4.442108  |
| H                  | -7.049782 | -6.310296 | -2.850978 | O | -0.830796 | -1.203278 | 4.136294  |
| H                  | -8.373102 | -5.979502 | -3.978312 | C | -0.007600 | -6.840500 | 7.092800  |
| H                  | -6.767221 | -5.295456 | -4.274075 | C | 0.454212  | -5.607506 | 7.879219  |
| C                  | -8.852159 | -4.669840 | -1.550499 | C | 0.868719  | -4.460862 | 6.954069  |
| H                  | -9.095864 | -3.812866 | -0.915266 | C | -8.690500 | -1.742900 | -2.971400 |
| H                  | -9.792797 | -5.061841 | -1.958566 | C | -9.699110 | -1.804322 | -1.818352 |
| H                  | -8.422195 | -5.444837 | -0.906272 | C | -9.515865 | -2.993464 | -0.854629 |
| H                  | 1.631176  | -5.876133 | 8.298738  | C | 2.705400  | -6.644800 | 2.400900  |
| C                  | 2.020973  | -1.903284 | 6.248224  | C | 2.508821  | -5.491902 | 3.169366  |
| H                  | 1.083073  | -1.633492 | 5.757164  | C | 2.313621  | -6.609417 | 1.055303  |
| H                  | 2.492070  | -0.998963 | 6.639719  | C | 1.944847  | -4.335075 | 2.622382  |
| H                  | 2.695904  | -2.368657 | 5.525780  | C | 1.757022  | -5.465996 | 0.492708  |
| S                  | 1.738799  | -3.012134 | 7.675708  | C | 1.550151  | -4.271464 | 1.249496  |
| N                  | -4.907208 | -0.731433 | -1.421436 | O | 1.051728  | -3.197157 | 0.696584  |
| O                  | -5.759775 | 0.157966  | -1.336177 | C | -3.694600 | 8.181300  | 1.801400  |
| O                  | -5.100407 | -1.803161 | -2.008771 | C | -2.383854 | 8.852835  | 2.216644  |
| H                  | 0.086655  | 5.853234  | 1.920121  | C | -1.131814 | 8.184505  | 1.630588  |
| <b>TS3-R-C2-r1</b> |           |           |           |   |           |           |           |
| C                  | 3.159900  | -0.420100 | -5.996900 | O | -1.159395 | 6.878848  | 1.634670  |
| C                  | 2.153962  | -1.573132 | -5.924247 | O | -0.187092 | 8.872954  | 1.235513  |
| O                  | 1.847784  | -2.219557 | -6.933170 | C | -3.744000 | 5.515700  | 4.550600  |
|                    |           |           |           | C | -2.296631 | 5.262482  | 5.015793  |
|                    |           |           |           | O | -2.060724 | 4.852732  | 6.157627  |

|   |            |           |           |   |            |           |           |
|---|------------|-----------|-----------|---|------------|-----------|-----------|
| C | -4.728900  | 4.588700  | 5.273300  | H | -3.982923  | 6.564812  | 4.768020  |
| N | -1.324053  | 5.524640  | 4.103208  | H | 1.136695   | 2.805789  | 2.401032  |
| C | 0.101300   | 5.449200  | 4.426900  | H | 0.467885   | 2.699091  | 4.040110  |
| C | 0.960246   | 4.716896  | 3.389510  | H | -0.543138  | 3.298343  | 2.713936  |
| C | 0.473023   | 3.293462  | 3.119986  | H | 0.177041   | 4.938768  | 5.389520  |
| C | -3.674500  | 5.342300  | -1.577500 | H | -4.240876  | 4.776014  | -2.319459 |
| C | -2.377335  | 4.645748  | -1.282385 | H | -4.287014  | 5.434104  | -0.674680 |
| C | -1.821935  | 3.488544  | -1.774672 | H | -2.194774  | 2.800911  | -2.516239 |
| N | -1.467552  | 5.122729  | -0.351193 | H | 0.414719   | 4.417731  | 0.384888  |
| C | -0.424704  | 4.285045  | -0.285609 | H | 0.086151   | 2.409142  | -1.135208 |
| N | -0.611376  | 3.282213  | -1.138134 | H | -4.554481  | 8.646220  | 2.295815  |
| O | 0.494561   | 1.134017  | -3.346382 | H | -8.942119  | -0.929495 | -3.661338 |
| O | 0.566036   | -0.916391 | 1.814971  | H | 4.008569   | -0.739088 | -6.606455 |
| H | 3.506159   | -0.099917 | -5.013612 | H | 6.399483   | -0.618354 | -3.598335 |
| H | 2.687643   | 0.428083  | -6.503039 | H | 4.269249   | 3.569845  | -3.177524 |
| H | 2.019224   | -3.703891 | -3.030353 | H | 3.145682   | -7.537630 | 2.834592  |
| H | 0.611842   | -2.960851 | -2.284003 | H | -0.303790  | -7.648725 | 7.769425  |
| H | 1.898951   | -5.955626 | -4.063514 | H | 0.507682   | 6.462246  | 4.555122  |
| H | -1.456568  | -4.309604 | -1.954375 | H | -3.834839  | -5.290961 | 5.543038  |
| H | 0.848552   | -8.193538 | -3.995352 | H | -1.528888  | 5.943799  | 0.292678  |
| H | -2.519265  | -6.539925 | -1.890822 | H | 0.095779   | 0.237199  | -3.360452 |
| H | -1.373977  | -8.497802 | -2.915761 | H | -0.866590  | -6.600784 | 6.456928  |
| H | 0.810218   | -3.600574 | -5.273922 | H | -1.561932  | 5.980672  | 3.217809  |
| H | -3.058998  | -5.291237 | -7.221573 | H | 1.872711   | -1.204007 | -3.907610 |
| H | -3.382473  | -5.268561 | -5.480235 | H | 3.993675   | 0.075724  | -2.323342 |
| H | -3.547660  | -2.887475 | -7.403083 | H | 3.888126   | -3.084297 | 2.011650  |
| H | -4.807538  | -3.433963 | -6.287203 | C | 0.175378   | 0.120889  | 0.909705  |
| H | -3.050935  | -1.421855 | -5.554437 | C | 1.349607   | 0.412892  | -0.077830 |
| H | -3.592004  | -2.602611 | -4.359402 | H | 2.227781   | 0.553597  | 0.576232  |
| H | -1.000174  | -5.028257 | -5.446916 | H | 0.028652   | 1.012358  | 1.528182  |
| H | 2.554798   | 2.217973  | -4.267728 | C | -1.158399  | -0.194998 | 0.251909  |
| H | 1.902068   | 3.185359  | -2.968861 | C | -2.187857  | 0.758265  | 0.257887  |
| H | 3.906967   | 2.873638  | -1.603505 | C | -1.405914  | -1.454587 | -0.322318 |
| H | 6.322567   | -2.703930 | -2.563856 | C | -3.423064  | 0.496532  | -0.323132 |
| H | 4.635571   | -2.238073 | -2.660812 | H | -2.022108  | 1.719024  | 0.732902  |
| H | 3.263052   | -2.606250 | -0.331084 | C | -2.633939  | -1.733846 | -0.908592 |
| H | 8.390072   | -1.887948 | -0.719383 | H | -0.641837  | -2.226500 | -0.274392 |
| H | 9.742888   | -2.134933 | 1.337705  | C | -3.626587  | -0.751841 | -0.910688 |
| H | 6.210619   | -2.987249 | 3.667361  | H | -4.218045  | 1.230740  | -0.321006 |
| H | 8.674151   | -2.676570 | 3.505742  | H | -2.842864  | -2.696387 | -1.355840 |
| H | 6.882773   | -0.275754 | -1.947248 | H | 1.535277   | -0.506295 | -0.652918 |
| H | -2.635980  | -5.331505 | 3.355730  | H | -3.505553  | 6.350200  | -1.970854 |
| H | -3.580305  | -3.292620 | 7.024212  | H | -3.685285  | 7.120484  | 2.053739  |
| H | -1.210848  | -3.428546 | 2.657133  | H | -3.814182  | 5.394430  | 3.465168  |
| H | -2.159098  | -1.385733 | 6.313113  | H | -8.699225  | -2.676097 | -3.548264 |
| H | -0.404644  | -1.244797 | 3.239108  | H | -0.980579  | -4.058732 | -6.935909 |
| H | -0.353596  | -5.268023 | 8.539260  | H | 1.964489   | 4.653091  | 3.833216  |
| H | 1.685696   | -4.777831 | 6.296930  | O | 1.120845   | 5.454359  | 2.175646  |
| H | 0.028180   | -4.148444 | 6.326577  | H | 0.337067   | 6.030799  | 2.003127  |
| H | 0.790495   | -7.219836 | 6.445361  | H | -4.545853  | 3.541688  | 5.012742  |
| H | -10.715330 | -1.850821 | -2.233728 | H | -9.651674  | -0.870212 | -1.239618 |
| H | -9.531375  | -3.913346 | -1.459941 | C | -10.684810 | -3.067756 | 0.138989  |
| H | -7.670327  | -1.572386 | -2.621085 | H | -11.647250 | -3.147563 | -0.379255 |
| H | 2.450370   | -7.491189 | 0.431148  | H | -10.588872 | -3.932581 | 0.804937  |
| H | 2.801788   | -5.489176 | 4.218080  | H | -10.719400 | -2.169064 | 0.767540  |
| H | 1.462652   | -5.459763 | -0.552346 | C | -8.174954  | -2.944005 | -0.107294 |
| H | 1.776190   | -3.459802 | 3.247228  | H | -7.320608  | -2.953764 | -0.789668 |
| H | 0.808021   | -1.795155 | 1.351207  | H | -8.104368  | -2.032712 | 0.499984  |
| H | -2.373046  | 9.911559  | 1.940560  | H | -8.072595  | -3.800343 | 0.568878  |
| H | -2.283637  | 8.809231  | 3.310642  | N | -4.912185  | -1.042129 | -1.528198 |
| H | -3.852690  | 8.263178  | 0.719697  | O | -5.788358  | -0.172386 | -1.494505 |
| H | -4.615610  | 4.687015  | 6.354809  | O | -5.073623  | -2.148405 | -2.060316 |
| H | -5.761038  | 4.831217  | 5.002489  | H | 1.296785   | -5.876384 | 8.528329  |

S 1.440484 -3.006879 7.926895  
C 1.914979 -1.876598 6.568142  
H 2.272039 -0.954520 7.031921  
H 2.723099 -2.308012 5.971773  
H 1.062214 -1.646673 5.925046

**Prod-R-C2-r1**

C 2.747604 -0.068809 -6.188805  
C 1.647667 -1.129049 -6.154185  
O 1.127009 -1.553661 -7.188356  
N 1.257363 -1.570229 -4.917686  
C 0.063237 -2.403485 -4.770200  
C -1.190311 -1.526397 -4.953751  
O -1.210902 -0.372137 -4.474210  
C 0.080020 -3.108780 -3.390677  
C -0.946391 -4.214731 -3.261522  
C -0.670786 -5.496997 -3.761574  
C -2.191188 -3.986087 -2.660228  
C -1.617614 -6.519088 -3.675625  
C -3.141786 -5.005735 -2.574098  
C -2.859596 -6.274378 -3.084309  
N -2.250385 -2.030170 -5.614058  
C -2.370304 -3.342705 -6.312074  
C -3.860932 -3.413746 -6.663317  
C -4.250262 -1.944128 -6.884666  
C -3.458759 -1.199635 -5.803206  
C 4.091890 2.475997 -2.611095  
C 4.888796 1.334165 -3.254411  
O 5.296346 1.439926 -4.417113  
C 2.757219 2.718939 -3.346164  
C 1.816733 1.526050 -3.375698  
O 1.649725 1.454370 0.158409  
O 2.055094 0.440508 -2.860666  
N 5.114317 0.232625 -2.487695  
C 5.768039 -0.970355 -3.003038  
C 4.924288 -2.255236 -2.903517  
C 4.874082 -2.882070 -1.539273  
C 3.763509 -3.077390 -0.750587  
C 5.983204 -3.468053 -0.820965  
C 5.460381 -3.992910 0.397460  
C 7.356412 -3.627029 -1.088137  
N 4.111428 -3.727591 0.414463  
C 6.265436 -4.652011 1.334453  
C 8.158623 -4.281445 -0.159602  
C 7.618218 -4.787841 1.041373  
C -3.419097 -4.674787 4.943885  
C -2.792180 -4.575023 3.698685  
C -3.091553 -3.755219 5.945059  
C -1.849333 -3.577996 3.444595  
C -2.150790 -2.754621 5.708822  
C -1.519546 -2.659306 4.456940  
O -0.610792 -1.669368 4.282822  
C -0.421894 -7.606005 6.290804  
C 0.468233 -6.664675 7.111401  
C 0.846752 -5.408272 6.323838  
C -8.987982 -0.412586 -2.515111  
C -8.825524 -1.496150 -3.587440  
C -7.871073 -2.645212 -3.205224  
C 2.028088 -7.157855 1.473228  
C 2.076638 -6.065993 2.345552  
C 1.376248 -6.992346 0.243504  
C 1.500670 -4.836884 2.007682  
C 0.801272 -5.777566 -0.111061

C 0.842223 -4.643822 0.754024  
O 0.306985 -3.506164 0.389609  
C -2.589606 8.254800 2.977108  
C -1.302610 8.858863 2.405923  
C -0.057274 8.000162 2.681106  
O -0.208275 6.730036 2.452805  
O 0.982616 8.534408 3.086139  
C -2.801195 5.303666 5.408422  
C -1.368103 4.859007 5.743641  
O -1.127678 4.268104 6.803846  
C -3.807502 4.207520 5.790450  
N -0.416983 5.149824 4.821372  
C 0.996010 4.824109 5.011738  
C 1.658788 4.133378 3.811557  
C 0.893234 2.890121 3.356370  
C -3.096089 5.853094 -0.690712  
C -1.881721 4.978995 -0.616316  
C -1.501488 3.850136 -1.310289  
N -0.848627 5.212819 0.268925  
C 0.082776 4.245173 0.083545  
N -0.272224 3.392938 -0.867822  
O 0.701781 1.763530 -4.074208  
O 0.488034 -1.562179 1.915776  
H 3.409661 -0.088987 -5.323908  
H 2.273767 0.916763 -6.240559  
H 1.084595 -3.524699 -3.262258  
H -0.063754 -2.367903 -2.598982  
H 0.296217 -5.695138 -4.217516  
H -2.413552 -3.006460 -2.247185  
H -1.383464 -7.505988 -4.064518  
H -4.099275 -4.809491 -2.100224  
H -3.596754 -7.068790 -3.012983  
H 0.105137 -3.153786 -5.562003  
H -4.043540 -4.047981 -7.534381  
H -4.419517 -3.829370 -5.817901  
H -3.930120 -1.614311 -7.879350  
H -5.325485 -1.767477 -6.801787  
H -3.169213 -0.185756 -6.087682  
H -4.011942 -1.134982 -4.858933  
H -2.050174 -4.161643 -5.669302  
H 2.944467 3.008141 -4.385906  
H 2.213313 3.549746 -2.884017  
H 3.887267 2.279235 -1.554537  
H 5.366512 -2.971800 -3.610236  
H 3.911109 -2.051454 -3.265202  
H 2.728186 -2.820527 -0.926924  
H 7.788268 -3.251397 -2.011807  
H 9.218880 -4.407814 -0.360388  
H 5.844048 -5.047271 2.254020  
H 8.269013 -5.294992 1.748058  
H 6.721091 -1.116153 -2.480665  
H -3.036955 -5.281547 2.909882  
H -3.571695 -3.815839 6.918300  
H -1.368291 -3.505559 2.473880  
H -1.890226 -2.035160 6.479197  
H -0.199184 -1.702813 3.364983  
H -0.051884 -6.374295 8.032730  
H 1.383515 -5.679259 5.408474  
H -0.049252 -4.848976 6.037314  
H 0.089013 -7.939737 5.381050  
H -8.448708 -1.031097 -4.508479  
H -6.895470 -2.193429 -2.975298  
H -9.505326 -0.792690 -1.628041

H 1.320615 -7.827361 -0.452911  
H 2.576505 -6.167151 3.307470  
H 0.300212 -5.662742 -1.067512  
H 1.535411 -4.006079 2.708474  
H 0.424091 -2.385785 1.239417  
H -1.401333 8.961096 1.315971  
H -1.124756 9.861520 2.806652  
H -2.764621 7.260015 2.560750  
H -3.674127 3.926332 6.837219  
H -4.835903 4.552421 5.645333  
H -3.005464 6.213798 5.986707  
H 1.393130 2.436460 2.497737  
H 0.833096 2.151976 4.165109  
H -0.127294 3.148716 3.057517  
H 1.049484 4.176388 5.889736  
H -3.775924 5.484762 -1.463198  
H -3.644900 5.869562 0.258400  
H -2.043758 3.344241 -2.097789  
H 0.983105 4.203326 0.680545  
H 0.884608 1.805239 -0.343015  
H -3.459172 8.880719 2.747413  
H -9.572550 0.431616 -2.896804  
H 3.331142 -0.208935 -7.100175  
H 5.997537 -0.752641 -4.047999  
H 4.697590 3.383157 -2.683926  
H 2.481175 -8.107079 1.742955  
H -0.691807 -8.495211 6.869900  
H 1.560486 5.740050 5.233820  
H -4.154434 -5.452040 5.129236  
H -0.778016 5.931578 1.010736  
H 0.131904 0.953067 -4.104981  
H -1.348243 -7.106550 5.987009  
H -0.644996 5.715711 4.001936  
H 1.562778 -1.045273 -4.100333  
H 4.637443 0.168882 -1.599233  
H 3.438461 -4.084010 1.086296  
C 0.298345 -0.292292 1.300376  
C 1.518439 0.068794 0.436337  
H 2.398576 -0.214398 1.021163  
H 0.264650 0.442462 2.114123  
C -1.056756 -0.232363 0.594021  
C -2.216891 -0.314288 1.385764  
C -1.202030 -0.130156 -0.796064  
C -3.481981 -0.300792 0.816294  
H -2.115949 -0.394030 2.463426  
C -2.462416 -0.114943 -1.392189  
H -0.331836 -0.054715 -1.437738  
C -3.587866 -0.205966 -0.574834  
H -4.376201 -0.364236 1.422642  
H -2.559944 -0.037968 -2.467912  
H 1.536489 -0.531743 -0.483672  
H -2.837741 6.889829 -0.937029  
H -2.530093 8.157255 4.066176  
H -2.888407 5.568295 4.351037  
H -8.012907 -0.034729 -2.190941  
H -1.744437 -3.332685 -7.212790  
H 2.649280 3.812489 4.167180  
O 1.912715 5.030028 2.733401  
H 1.178343 5.689602 2.658598  
H -3.661262 3.311187 5.179198  
H -9.809339 -1.918148 -3.841951  
C -7.681969 -3.604802 -4.388870  
H -7.316964 -3.076400 -5.277084

H -6.962671 -4.396189 -4.150002  
H -8.629756 -4.088658 -4.657753  
C -8.340848 -3.410832 -1.959465  
H -8.393972 -2.764278 -1.078707  
H -9.336517 -3.844693 -2.119311  
H -7.655580 -4.232566 -1.723162  
N -4.914821 -0.205016 -1.184035  
O -5.898894 -0.246960 -0.439198  
O -4.997584 -0.164518 -2.417226  
H 1.379606 -7.191808 7.419621  
S 1.926094 -4.303597 7.325979  
C 2.287412 -3.000702 6.092730  
H 1.370195 -2.534659 5.724716  
H 2.896094 -2.246396 6.596105  
H 2.854930 -3.410149 5.253047

**RC-R-C1-r3**

C 2.032902 0.816124 -6.542845  
C 1.109742 -0.399281 -6.468743  
O 0.824946 -1.053344 -7.478454  
N 0.614515 -0.699038 -5.234443  
C -0.344782 -1.784833 -5.041372  
C -1.780306 -1.216502 -5.016296  
O -2.034027 -0.213955 -4.329956  
C -0.044643 -2.506460 -3.702649  
C -0.907830 -3.726515 -3.464408  
C -0.515924 -4.983385 -3.951033  
C -2.124599 -3.630000 -2.773596  
C -1.317781 -6.110467 -3.758955  
C -2.930414 -4.754093 -2.581669  
C -2.530552 -5.998238 -3.074674  
N -2.750964 -1.835924 -5.722329  
C -2.646882 -3.060081 -6.542428  
C -4.112418 -3.436161 -6.803098  
C -4.831774 -2.078273 -6.819338  
C -4.121601 -1.292041 -5.711382  
C 3.061422 3.613287 -3.049926  
C 4.270317 2.681029 -3.235416  
O 5.402109 3.154242 -3.399166  
C 1.653015 3.027632 -3.270930  
C 1.294908 1.901071 -2.277295  
O 1.105661 2.229113 -1.078092  
O 1.280411 0.702787 -2.722791  
N 4.055434 1.341185 -3.176848  
C 5.144953 0.386931 -3.346592  
C 4.650042 -1.068697 -3.317210  
C 4.497172 -1.645993 -1.939942  
C 3.376867 -1.635914 -1.144486  
C 5.533543 -2.298945 -1.177291  
C 4.963379 -2.667593 0.074780  
C 6.881184 -2.616962 -1.427353  
N 3.656788 -2.234071 0.070280  
C 5.694446 -3.345196 1.057777  
C 7.611919 -3.286500 -0.452095  
C 7.023120 -3.648554 0.778195  
C -3.510010 -4.169463 4.753549  
C -3.040834 -3.770771 3.502313  
C -2.870221 -3.703999 5.906243  
C -1.935704 -2.926901 3.393359  
C -1.764606 -2.860055 5.812876  
C -1.289384 -2.476949 4.552454  
O -0.177873 -1.680902 4.510984  
C -0.175311 -6.670757 6.171975

|   |           |           |           |   |            |           |           |
|---|-----------|-----------|-----------|---|------------|-----------|-----------|
| C | 0.474853  | -5.741588 | 7.202473  | H | -1.573382  | -2.637978 | 2.413102  |
| C | 1.411091  | -4.727905 | 6.542313  | H | -1.257645  | -2.493571 | 6.699893  |
| C | -9.567687 | -0.846344 | -2.801431 | H | 0.001012   | -1.395062 | 3.592302  |
| C | -9.056750 | -2.235198 | -2.402425 | H | -0.305783  | -5.204936 | 7.754316  |
| C | -7.742820 | -2.239289 | -1.596097 | H | 2.233787   | -5.239350 | 6.029990  |
| C | 2.195011  | -6.072933 | 1.331060  | H | 0.864866   | -4.134189 | 5.803399  |
| C | 2.100521  | -4.977502 | 2.189218  | H | 0.579871   | -7.224551 | 5.602883  |
| C | 1.473654  | -6.062472 | 0.133061  | H | -8.906751  | -2.832423 | -3.311795 |
| C | 1.307657  | -3.874399 | 1.856647  | H | -6.990245  | -1.695094 | -2.186877 |
| C | 0.681497  | -4.971211 | -0.213623 | H | -9.826710  | -0.238891 | -1.928660 |
| C | 0.602180  | -3.863582 | 0.642628  | H | 1.533113   | -6.910073 | -0.544043 |
| O | -0.175626 | -2.818327 | 0.242849  | H | 2.641895   | -4.972860 | 3.131091  |
| C | -4.268656 | 8.699401  | 2.397503  | H | 0.128156   | -4.950597 | -1.145565 |
| C | -3.087145 | 8.918474  | 1.451680  | H | 1.227171   | -3.039159 | 2.544842  |
| C | -2.062844 | 7.776006  | 1.508238  | H | -0.042477  | -2.035638 | 0.817004  |
| O | -2.531800 | 6.586388  | 1.576160  | H | -3.451658  | 8.989122  | 0.417353  |
| O | -0.845922 | 8.078827  | 1.491877  | H | -2.570312  | 9.858093  | 1.669485  |
| C | -4.114906 | 5.818978  | 4.916918  | H | -4.784065  | 7.767441  | 2.156221  |
| C | -2.628083 | 5.710156  | 5.289936  | H | -4.700834  | 4.229803  | 6.277461  |
| O | -2.296483 | 5.435662  | 6.451721  | H | -5.929959  | 4.614111  | 5.054017  |
| C | -4.855278 | 4.508647  | 5.231804  | H | -4.536872  | 6.635444  | 5.514417  |
| N | -1.732246 | 5.913809  | 4.291822  | H | 0.503695   | 3.767380  | 1.775212  |
| C | -0.288310 | 5.795230  | 4.515369  | H | -0.425498  | 3.332282  | 3.228148  |
| C | 0.533157  | 5.286043  | 3.309952  | H | -1.077354  | 4.511302  | 2.075046  |
| C | -0.162281 | 4.152373  | 2.551243  | H | -0.164251  | 5.111494  | 5.360494  |
| C | -4.482835 | 6.144053  | -1.194643 | H | -5.286795  | 6.065745  | -1.931501 |
| C | -3.335184 | 5.283910  | -1.598766 | H | -4.882286  | 5.851663  | -0.218250 |
| C | -3.080940 | 4.546825  | -2.730746 | H | -3.705108  | 4.436682  | -3.607490 |
| N | -2.235408 | 5.089829  | -0.788672 | H | -0.439463  | 3.914428  | -1.034041 |
| C | -1.379752 | 4.261283  | -1.444073 | H | -1.285780  | 2.964907  | -4.224817 |
| N | -1.860512 | 3.910578  | -2.628801 | H | -4.990276  | 9.521521  | 2.329718  |
| O | -1.168664 | 2.479847  | -5.069779 | H | -10.464783 | -0.922914 | -3.424966 |
| O | 0.143522  | -0.633306 | 1.956083  | H | 2.647622   | 0.734831  | -7.439950 |
| H | 2.665849  | 0.913930  | -5.658267 | H | 5.641742   | 0.589285  | -4.304735 |
| H | 1.413648  | 1.716891  | -6.613808 | H | 3.232956   | 4.461728  | -3.719002 |
| H | 1.011407  | -2.793881 | -3.720585 | H | 2.815405   | -6.924176 | 1.592892  |
| H | -0.169477 | -1.780920 | -2.892962 | H | -0.826189  | -7.402547 | 6.661540  |
| H | 0.429731  | -5.078162 | -4.479342 | H | 0.136237   | 6.761801  | 4.819057  |
| H | -2.436997 | -2.666337 | -2.381335 | H | -4.369464  | -4.828005 | 4.832865  |
| H | -0.993437 | -7.074978 | -4.139538 | H | -2.124534  | 5.539291  | 0.133014  |
| H | -3.868012 | -4.658444 | -2.041310 | H | -1.345238  | 1.558470  | -4.816583 |
| H | -3.154552 | -6.873866 | -2.920805 | H | -0.783984  | -6.103764 | 5.460785  |
| H | -0.213060 | -2.469804 | -5.879814 | H | -2.068300  | 6.126393  | 3.348074  |
| H | -4.231727 | -4.004330 | -7.729060 | H | 0.812723   | -0.086466 | -4.433302 |
| H | -4.486685 | -4.050757 | -5.976978 | H | 3.106861   | 0.973944  | -3.079822 |
| H | -4.682623 | -1.583487 | -7.785564 | H | 2.970549   | -2.465321 | 0.773410  |
| H | -5.907713 | -2.158457 | -6.645184 | C | -0.614600  | 0.605040  | 2.029788  |
| H | -4.096159 | -0.212991 | -5.878878 | C | 0.765891   | 0.631288  | 1.521496  |
| H | -4.581607 | -1.463037 | -4.729724 | H | -1.436868  | 0.678290  | 1.323314  |
| H | -2.104884 | -3.845811 | -6.013779 | H | -0.826476  | 0.925058  | 3.046555  |
| H | 1.538123  | 2.666202  | -4.293503 | C | 4.149672   | 2.065271  | 3.675979  |
| H | 0.930142  | 3.836615  | -3.135692 | C | 3.183066   | 1.340902  | 4.375196  |
| H | 3.128724  | 4.006758  | -2.027452 | C | 4.031741   | 2.331675  | 2.312734  |
| H | 5.373684  | -1.673810 | -3.875765 | C | 2.073205   | 0.868066  | 3.685641  |
| H | 3.706469  | -1.138425 | -3.871464 | H | 3.308899   | 1.158374  | 5.434359  |
| H | 2.402483  | -1.212111 | -1.351265 | C | 2.918486   | 1.848490  | 1.631706  |
| H | 7.346708  | -2.343185 | -2.370544 | H | 4.800492   | 2.899525  | 1.804964  |
| H | 8.653281  | -3.535510 | -0.636353 | C | 1.932832   | 1.114857  | 2.310713  |
| H | 5.239101  | -3.624467 | 2.003238  | H | 1.320312   | 0.305682  | 4.226427  |
| H | 7.617996  | -4.172295 | 1.521171  | H | 2.788225   | 2.047920  | 0.572094  |
| H | 5.904220  | 0.543426  | -2.570641 | H | 0.872638   | 0.723305  | 0.441005  |
| H | -3.531252 | -4.119790 | 2.598161  | H | -4.198285  | 7.199994  | -1.120464 |
| H | -3.232975 | -3.998830 | 6.886873  | H | -3.933814  | 8.636621  | 3.438149  |

H -4.231102 6.084061 3.862632  
H -8.811521 -0.297238 -3.374448  
H -2.116534 -2.842362 -7.478232  
H 1.456155 4.882531 3.750080  
O 0.972643 6.318409 2.446830  
H 0.209554 6.822754 2.067509  
H -4.487917 3.690192 4.604022  
H -9.830453 -2.757951 -1.821173  
C -7.235366 -3.675446 -1.400258  
H -6.281786 -3.689385 -0.860849  
H -7.952583 -4.268289 -0.818683  
H -7.086596 -4.181996 -2.360383  
C -7.881236 -1.528475 -0.241535  
H -8.166476 -0.478184 -0.353681  
H -8.643043 -2.018291 0.378367  
H -6.936368 -1.554619 0.311699  
H 1.032242 -6.332718 7.939828  
C 2.917049 -2.368274 6.660224  
H 3.341896 -1.576497 7.280589  
H 3.719915 -2.840758 6.088750  
H 2.178561 -1.938866 5.979184  
S 2.116055 -3.567799 7.784766  
N 5.325295 2.556835 4.399338  
O 5.414006 2.304637 5.604179  
O 6.170536 3.196477 3.770022

**TS1-R-C1-r3**

C 2.418673 0.216869 -6.166534  
C 1.503571 -1.001809 -6.082335  
O 1.242898 -1.676537 -7.083854  
N 0.985966 -1.285673 -4.850825  
C 0.040996 -2.384053 -4.665185  
C -1.400157 -1.838014 -4.604249  
O -1.657863 -0.857102 -3.887922  
C 0.368479 -3.168316 -3.369209  
C -0.441235 -4.438765 -3.218895  
C 0.016684 -5.644662 -3.771077  
C -1.674975 -4.436785 -2.552783  
C -0.737492 -6.815716 -3.665948  
C -2.434137 -5.603718 -2.449450  
C -1.968716 -6.797317 -3.006475  
N -2.369423 -2.452987 -5.316256  
C -2.261147 -3.659318 -6.166116  
C -3.725431 -4.052683 -6.405859  
C -4.465263 -2.706136 -6.382746  
C -3.748706 -1.932206 -5.270369  
C 3.446804 3.013808 -2.673124  
C 4.635337 2.065736 -2.893830  
O 5.756744 2.532028 -3.125540  
C 2.009305 2.458760 -2.775842  
C 1.684395 1.312050 -1.797030  
O 1.522539 1.620616 -0.575226  
O 1.654946 0.128376 -2.255216  
N 4.430445 0.725991 -2.775975  
C 5.530796 -0.212477 -2.970390  
C 5.079635 -1.683650 -2.968268  
C 4.976831 -2.321716 -1.612684  
C 3.841831 -2.777212 -0.985123  
C 6.075551 -2.628838 -0.726582  
C 5.522322 -3.267304 0.421052  
C 7.469873 -2.445590 -0.791156  
N 4.162101 -3.343018 0.231786  
C 6.316119 -3.708465 1.486984

C 8.260949 -2.882902 0.265136  
C 7.688823 -3.506284 1.394562  
C -3.124209 -4.768614 5.129700  
C -2.770565 -4.554183 3.794637  
C -2.530886 -3.979352 6.120639  
C -1.835038 -3.578378 3.444818  
C -1.594747 -3.001483 5.787137  
C -1.233706 -2.796820 4.445228  
O -0.296292 -1.850115 4.182613  
C 0.210447 -7.269990 6.548232  
C 0.888141 -6.175396 7.381130  
C 1.525248 -5.100920 6.497809  
C -9.181950 -1.445568 -2.425140  
C -8.443054 -2.768069 -2.193082  
C -7.103347 -2.642807 -1.440599  
C 2.580768 -6.672027 1.707377  
C 2.391903 -5.505026 2.450229  
C 1.907870 -6.815926 0.489953  
C 1.556058 -4.483580 1.985760  
C 1.072830 -5.809383 0.012001  
C 0.893806 -4.626795 0.751076  
O 0.083535 -3.674038 0.236542  
C -3.882915 8.100195 2.773818  
C -2.671316 8.324948 1.868340  
C -1.667520 7.165027 1.922629  
O -2.159599 5.983738 1.979239  
O -0.445056 7.443198 1.915763  
C -3.729172 5.219763 5.293222  
C -2.244057 5.114756 5.675311  
O -1.916823 4.847164 6.839721  
C -4.469531 3.909423 5.608091  
N -1.347084 5.316548 4.677896  
C 0.097417 5.196025 4.891657  
C 0.893631 4.610806 3.703125  
C 0.166539 3.456759 3.004971  
C -4.097278 5.544664 -0.818207  
C -2.954576 4.658003 -1.176770  
C -2.684763 3.892220 -2.286284  
N -1.877338 4.467394 -0.337093  
C -1.019024 3.614592 -0.953765  
N -1.475585 3.242564 -2.141808  
O -0.778861 1.840225 -4.586154  
O 0.240084 -1.453762 1.606254  
H 3.030788 0.342160 -5.270336  
H 1.797760 1.112627 -6.275591  
H 1.435442 -3.411026 -3.403729  
H 0.207441 -2.508630 -2.511309  
H 0.975767 -5.665385 -4.283104  
H -2.033947 -3.515796 -2.103530  
H -0.362202 -7.740229 -4.095750  
H -3.385614 -5.582099 -1.925675  
H -2.556569 -7.706641 -2.920433  
H 0.166921 -3.035134 -5.531148  
H -3.853892 -4.605689 -7.339735  
H -4.073633 -4.687770 -5.583917  
H -4.339251 -2.189751 -7.340904  
H -5.536811 -2.806045 -6.192615  
H -3.744054 -0.849507 -5.414697  
H -4.188542 -2.132289 -4.284993  
H -1.696482 -4.446020 -5.664484  
H 1.790891 2.114544 -3.787963  
H 1.323548 3.283820 -2.567028  
H 3.593444 3.446900 -1.675267

H 5.813809 -2.239963 -3.565654  
H 4.126906 -1.775260 -3.503053  
H 2.814270 -2.744465 -1.317951  
H 7.925624 -1.969882 -1.655189  
H 9.337425 -2.742977 0.224020  
H 5.873318 -4.193192 2.351992  
H 8.332031 -3.835021 2.205814  
H 6.294342 -0.049344 -2.200893  
H -3.223291 -5.154300 3.009836  
H -2.797882 -4.123990 7.164091  
H -1.560078 -3.428281 2.405392  
H -1.129046 -2.387769 6.551937  
H -0.134447 -1.736284 3.204891  
H 0.149414 -5.707716 8.043117  
H 2.301377 -5.540498 5.861726  
H 0.768842 -4.645374 5.851214  
H 0.924099 -7.756204 5.873844  
H -8.251289 -3.241732 -3.165265  
H -6.475494 -1.931348 -1.998644  
H -9.485081 -0.974994 -1.484667  
H 2.040374 -7.719371 -0.099372  
H 2.898729 -5.378431 3.402923  
H 0.557164 -5.911382 -0.936450  
H 1.408780 -3.583669 2.574006  
H 0.145684 -2.814819 0.752506  
H -3.003719 8.427981 0.825773  
H -2.146079 9.250321 2.124161  
H -4.402149 7.180695 2.496309  
H -4.322081 3.634747 6.655871  
H -5.543135 4.012493 5.422428  
H -4.156088 6.037424 5.885687  
H 0.818818 3.023995 2.242281  
H -0.110234 2.671444 3.717816  
H -0.744797 3.812885 2.518909  
H 0.223724 4.558439 5.771396  
H -4.878408 5.475664 -1.580020  
H -4.534763 5.269307 0.146914  
H -3.289099 3.770997 -3.175300  
H -0.091459 3.274490 -0.512884  
H -0.898126 2.312369 -3.733901  
H -4.591649 8.933318 2.703800  
H -10.088125 -1.601962 -3.020035  
H 3.054985 0.116082 -7.046170  
H 6.013542 0.018558 -3.928072  
H 3.578802 3.832948 -3.385363  
H 3.234917 -7.457221 2.073144  
H -0.219172 -8.043108 7.193662  
H 0.536076 6.173500 5.133733  
H -3.853664 -5.528561 5.392069  
H -1.778991 4.935307 0.579214  
H -0.981600 0.918674 -4.353254  
H -0.598357 -6.854772 5.937920  
H -1.686451 5.518825 3.733262  
H 1.163633 -0.664371 -4.057319  
H 3.488574 0.353741 -2.656428  
H 3.494554 -3.754344 0.871549  
C -0.126799 -0.191954 1.065056  
C 1.293703 -0.189124 0.727911  
H -0.809442 -0.232588 0.211894  
H -0.468666 0.534119 1.808236  
C 4.472004 0.822331 3.363238  
C 3.177040 0.759670 3.879315  
C 4.744509 0.567773 2.019284

C 2.131158 0.435950 3.024562  
H 3.004982 0.957588 4.929068  
C 3.689243 0.239401 1.177550  
H 5.761678 0.620084 1.654088  
C 2.372091 0.173690 1.664365  
H 1.129792 0.355822 3.428015  
H 3.882791 0.036643 0.130644  
H 1.561536 -0.696311 -0.188336  
H -3.793060 6.595058 -0.743928  
H -3.579634 8.009550 3.821893  
H -3.839455 5.481086 4.237437  
H -8.550512 -0.730222 -2.964823  
H -1.753332 -3.411377 -7.106810  
H 1.815098 4.209514 4.148483  
O 1.339539 5.592211 2.783792  
H 0.585694 6.134824 2.442041  
H -4.096408 3.089101 4.986258  
H -9.095343 -3.461207 -1.641862  
C -6.371411 -3.992734 -1.414785  
H -5.401408 -3.907928 -0.912732  
H -6.959082 -4.746091 -0.875249  
H -6.194514 -4.371539 -2.427665  
C -7.277729 -2.097914 -0.015099  
H -7.727477 -1.100583 -0.007080  
H -7.920754 -2.760118 0.578649  
H -6.312284 -2.026764 0.496944  
H 1.653437 -6.620338 8.029203  
C 2.787358 -2.613457 6.186313  
H 3.236010 -1.742976 6.669624  
H 3.531095 -3.075215 5.531792  
H 1.921795 -2.294391 5.600378  
S 2.283292 -3.767448 7.514167  
N 5.578275 1.151499 4.264075  
O 5.321973 1.337252 5.456795  
O 6.714177 1.224670 3.788779

**Int1-R-C1-r3**

C 2.292996 0.157190 -6.280393  
C 1.369490 -1.056121 -6.215461  
O 1.181071 -1.783781 -7.193290  
N 0.769834 -1.278135 -5.006607  
C -0.218695 -2.334581 -4.813420  
C -1.623290 -1.705732 -4.716608  
O -1.806230 -0.730911 -3.967605  
C 0.088260 -3.146825 -3.528680  
C -0.822928 -4.342405 -3.345534  
C -0.492939 -5.583301 -3.911121  
C -2.024004 -4.232900 -2.629897  
C -1.340818 -6.683687 -3.770872  
C -2.875569 -5.330488 -2.489726  
C -2.537540 -6.559267 -3.061160  
N -2.638457 -2.234541 -5.429118  
C -2.618199 -3.421107 -6.310992  
C -4.107116 -3.733569 -6.513447  
C -4.774509 -2.351189 -6.440594  
C -3.984892 -1.637321 -5.336931  
C 3.545080 2.782584 -2.727373  
C 4.652045 1.765310 -3.026980  
O 5.791868 2.175322 -3.262377  
C 2.060085 2.341898 -2.603266  
C 1.770471 1.115594 -1.755413  
O 1.885200 1.317646 -0.432165  
O 1.498215 0.019806 -2.233034

|   |           |           |           |   |            |           |           |
|---|-----------|-----------|-----------|---|------------|-----------|-----------|
| N | 4.370521  | 0.438312  | -2.960254 | H | -4.291382  | -4.258160 | -7.454290 |
| C | 5.419803  | -0.556201 | -3.150002 | H | -4.463453  | -4.368341 | -5.694898 |
| C | 4.878229  | -1.998417 | -3.215657 | H | -4.652089  | -1.822495 | -7.392482 |
| C | 4.787322  | -2.715722 | -1.898818 | H | -5.843206  | -2.399719 | -6.217742 |
| C | 3.654343  | -3.122601 | -1.233509 | H | -3.923630  | -0.554288 | -5.465442 |
| C | 5.904291  | -3.173521 | -1.106089 | H | -4.405897  | -1.829099 | -4.342186 |
| C | 5.364634  | -3.848224 | 0.026957  | H | -2.079519  | -4.248031 | -5.846090 |
| C | 7.303000  | -3.096412 | -1.244439 | H | 1.621033   | 2.132163  | -3.579262 |
| N | 3.993825  | -3.798729 | -0.079235 | H | 1.502200   | 3.182667  | -2.181784 |
| C | 6.177606  | -4.429965 | 1.007866  | H | 3.859128   | 3.267092  | -1.795697 |
| C | 8.113071  | -3.672892 | -0.272640 | H | 5.553100   | -2.560051 | -3.874090 |
| C | 7.555142  | -4.331760 | 0.843803  | H | 3.903903   | -2.002577 | -3.718903 |
| C | -3.380096 | -4.802889 | 4.962095  | H | 2.613504   | -2.987491 | -1.491502 |
| C | -2.778368 | -4.675798 | 3.704284  | H | 7.747661   | -2.595070 | -2.099984 |
| C | -3.117535 | -3.826658 | 5.929839  | H | 9.193502   | -3.616672 | -0.371085 |
| C | -1.927587 | -3.606337 | 3.406286  | H | 5.744373   | -4.943528 | 1.860882  |
| C | -2.272179 | -2.753795 | 5.649826  | H | 8.213244   | -4.771797 | 1.587603  |
| C | -1.666881 | -2.633665 | 4.386069  | H | 6.160143   | -0.464531 | -2.347099 |
| O | -0.847744 | -1.569604 | 4.190131  | H | -2.968035  | -5.421535 | 2.936429  |
| C | -0.186688 | -7.545600 | 6.254085  | H | -3.573804  | -3.898468 | 6.913808  |
| C | 0.611844  | -6.505311 | 7.048893  | H | -1.461609  | -3.521763 | 2.426969  |
| C | 0.914958  | -5.256696 | 6.216936  | H | -2.065723  | -1.994873 | 6.398421  |
| C | -9.331501 | -0.893999 | -2.394200 | H | -0.431404  | -1.542551 | 3.288933  |
| C | -8.639347 | -2.236067 | -2.132078 | H | 0.050756   | -6.216686 | 7.946394  |
| C | -7.310204 | -2.143449 | -1.356539 | H | 1.488434   | -5.522253 | 5.322427  |
| C | 2.143895  | -6.954494 | 1.392909  | H | -0.012454  | -4.774100 | 5.893093  |
| C | 2.247635  | -5.860632 | 2.259037  | H | 0.367763   | -7.878356 | 5.369791  |
| C | 1.370579  | -6.806311 | 0.233110  | H | -8.445235  | -2.728317 | -3.094549 |
| C | 1.606295  | -4.648547 | 1.981607  | H | -6.649844  | -1.459906 | -1.911983 |
| C | 0.725994  | -5.609378 | -0.058670 | H | -9.636597  | -0.402305 | -1.465233 |
| C | 0.817675  | -4.472364 | 0.801745  | H | 1.272531   | -7.641159 | -0.458696 |
| O | 0.214646  | -3.352709 | 0.502117  | H | 2.842858   | -5.945990 | 3.166722  |
| C | -3.372182 | 8.151197  | 2.981614  | H | 0.132042   | -5.510001 | -0.961896 |
| C | -1.977029 | 8.182394  | 2.350359  | H | 1.693964   | -3.812351 | 2.670781  |
| C | -1.300982 | 6.804852  | 2.269522  | H | 0.465166   | -2.158388 | 1.294755  |
| O | -2.077437 | 5.790416  | 2.236700  | H | -2.039920  | 8.568592  | 1.322716  |
| O | -0.044386 | 6.755445  | 2.236447  | H | -1.307831  | 8.863120  | 2.887191  |
| C | -3.360230 | 5.194971  | 5.416228  | H | -4.017216  | 7.447175  | 2.452615  |
| C | -1.885975 | 5.062745  | 5.833737  | H | -4.066139  | 3.701142  | 6.835921  |
| O | -1.561821 | 5.008269  | 7.027114  | H | -5.224718  | 4.066777  | 5.542574  |
| C | -4.163006 | 3.930686  | 5.770748  | H | -3.765657  | 6.052462  | 5.965285  |
| N | -1.002675 | 5.003542  | 4.807435  | H | 1.086013   | 1.733664  | 3.747000  |
| C | 0.451120  | 4.946437  | 4.950507  | H | 0.955550   | 2.234208  | 5.440307  |
| C | 1.071207  | 3.882358  | 4.033388  | H | -0.448997  | 2.375029  | 4.361032  |
| C | 0.639154  | 2.469992  | 4.418713  | H | 0.678761   | 4.728882  | 5.996768  |
| C | -3.798497 | 5.719405  | -0.676606 | H | -4.434110  | 5.848504  | -1.556592 |
| C | -2.726970 | 4.718247  | -0.965138 | H | -4.433481  | 5.405898  | 0.158919  |
| C | -2.403599 | 4.005558  | -2.097530 | H | -2.898151  | 4.021334  | -3.059448 |
| N | -1.794635 | 4.336320  | -0.023718 | H | -0.135376  | 2.991466  | -0.077671 |
| C | -0.964344 | 3.439008  | -0.606712 | H | -0.759728  | 2.285543  | -3.479621 |
| N | -1.299741 | 3.207115  | -1.869525 | H | -3.838389  | 9.142823  | 2.952531  |
| O | -0.615983 | 1.864520  | -4.355480 | H | -10.231133 | -1.029094 | -3.004103 |
| O | 0.573711  | -1.287651 | 1.873390  | H | 2.796073   | 0.163012  | -7.246932 |
| H | 3.034173  | 0.142821  | -5.476496 | H | 5.947116   | -0.317219 | -4.080698 |
| H | 1.700860  | 1.071611  | -6.167083 | H | 3.606473   | 3.550149  | -3.503088 |
| H | 1.129004  | -3.478355 | -3.599591 | H | 2.649259   | -7.889879 | 1.613289  |
| H | 0.014147  | -2.477247 | -2.665953 | H | -0.402040  | -8.427031 | 6.866917  |
| H | 0.440810  | -5.688114 | -4.458355 | H | 0.877712   | 5.926455  | 4.701358  |
| H | -2.285143 | -3.283174 | -2.171546 | H | -4.040357  | -5.636937 | 5.178456  |
| H | -1.064040 | -7.637834 | -4.210433 | H | -1.744035  | 4.729998  | 0.937321  |
| H | -3.797855 | -5.226913 | -1.925447 | H | -0.995534  | 0.975777  | -4.240823 |
| H | -3.196247 | -7.415211 | -2.946297 | H | -1.140798  | -7.130959 | 5.911224  |
| H | -0.137801 | -2.980153 | -5.688345 | H | -1.366261  | 5.081297  | 3.856349  |



|                    |           |           |           |   |           |           |           |
|--------------------|-----------|-----------|-----------|---|-----------|-----------|-----------|
| H                  | 0.876851  | -0.599526 | -4.257765 | C | -3.667055 | -4.631659 | -6.149000 |
| H                  | 3.424021  | 0.105766  | -2.841634 | C | -4.396068 | -3.279597 | -6.175213 |
| H                  | 3.326228  | -4.209642 | 0.567614  | C | -3.683948 | -2.476473 | -5.081712 |
| C                  | 0.541685  | -0.138119 | 1.056349  | C | 3.602402  | 2.569121  | -2.883280 |
| C                  | 1.937384  | 0.137081  | 0.439596  | C | 4.780664  | 1.585879  | -3.035563 |
| H                  | -0.171916 | -0.240844 | 0.227030  | O | 5.887921  | 2.004898  | -3.395816 |
| H                  | 0.239706  | 0.726473  | 1.658429  | C | 2.137040  | 2.081373  | -3.104995 |
| C                  | 5.036456  | 0.792613  | 3.329587  | C | 1.557809  | 0.880923  | -2.301352 |
| C                  | 4.802716  | -0.497429 | 2.854569  | O | 1.449943  | 1.239328  | -0.934697 |
| C                  | 4.282644  | 1.884207  | 2.898317  | O | 1.939245  | -0.309008 | -2.558661 |
| C                  | 3.794960  | -0.687733 | 1.915197  | N | 4.565566  | 0.293073  | -2.685941 |
| H                  | 5.410086  | -1.321760 | 3.204842  | C | 5.600088  | -0.724186 | -2.821192 |
| C                  | 3.271145  | 1.676671  | 1.965326  | C | 5.108116  | -2.142368 | -2.487829 |
| H                  | 4.489747  | 2.870503  | 3.292826  | C | 5.024031  | -2.486203 | -1.027463 |
| C                  | 3.024029  | 0.391096  | 1.459022  | C | 3.899328  | -2.851892 | -0.325312 |
| H                  | 3.613216  | -1.682195 | 1.523948  | C | 6.126148  | -2.582032 | -0.098229 |
| H                  | 2.666098  | 2.517018  | 1.643386  | C | 5.583806  | -3.004897 | 1.151941  |
| H                  | 2.203254  | -0.721019 | -0.179696 | C | 7.515742  | -2.378017 | -0.194738 |
| H                  | -3.380082 | 6.696602  | -0.412795 | N | 4.227541  | -3.152115 | 0.980902  |
| H                  | -3.324424 | 7.836013  | 4.027723  | C | 6.384706  | -3.213404 | 2.281311  |
| H                  | -3.437320 | 5.409418  | 4.347711  | C | 8.313820  | -2.586534 | 0.924919  |
| H                  | -8.667645 | -0.205792 | -2.930358 | C | 7.752942  | -2.998081 | 2.152340  |
| H                  | -2.128036 | -3.175641 | -7.261664 | C | -3.392898 | -4.279497 | 5.410798  |
| H                  | -3.804077 | 3.065962  | 5.203141  | C | -2.846667 | -4.415038 | 4.129442  |
| H                  | 2.164770  | 3.963512  | 4.165537  | C | -3.180941 | -3.084830 | 6.107538  |
| O                  | 0.732244  | 4.095611  | 2.663576  | C | -2.099655 | -3.387165 | 3.546840  |
| H                  | 0.559701  | 5.055039  | 2.493922  | C | -2.439095 | -2.050351 | 5.539840  |
| N                  | 6.105441  | 1.007543  | 4.305770  | C | -1.888164 | -2.190938 | 4.253497  |
| O                  | 6.750999  | 0.027996  | 4.689071  | O | -1.170995 | -1.152209 | 3.763265  |
| O                  | 6.312614  | 2.158168  | 4.700828  | C | -0.169900 | -6.724195 | 7.150199  |
| H                  | -9.323193 | -2.900988 | -1.584394 | C | 0.199657  | -5.439917 | 7.902096  |
| C                  | -6.623066 | -3.515764 | -1.299800 | C | 0.658955  | -4.330661 | 6.952667  |
| H                  | -6.439144 | -3.912947 | -2.304406 | C | -9.151004 | -1.516878 | -2.590802 |
| H                  | -5.660872 | -3.456123 | -0.779670 | C | -8.776383 | -2.990887 | -2.780654 |
| H                  | -7.245493 | -4.242675 | -0.762976 | C | -7.312468 | -3.339288 | -2.444362 |
| C                  | -7.492594 | -1.574400 | 0.058501  | C | 2.343699  | -6.641193 | 2.345193  |
| H                  | -7.910219 | -0.563170 | 0.045874  | C | 2.086051  | -5.431693 | 2.999505  |
| H                  | -8.166997 | -2.208068 | 0.648529  | C | 1.968162  | -6.755854 | 0.999942  |
| H                  | -6.534736 | -1.527502 | 0.587174  | C | 1.480040  | -4.358985 | 2.337986  |
| H                  | 1.552554  | -6.949024 | 7.397790  | C | 1.366049  | -5.700227 | 0.325302  |
| C                  | 2.172275  | -2.748589 | 5.934873  | C | 1.096857  | -4.451559 | 0.963885  |
| H                  | 2.723182  | -1.942300 | 6.423913  | O | 0.549015  | -3.464908 | 0.303340  |
| H                  | 2.774831  | -3.137229 | 5.109918  | C | -3.719903 | 8.329710  | 1.856510  |
| H                  | 1.228441  | -2.355231 | 5.549749  | C | -2.214770 | 8.584669  | 1.688688  |
| S                  | 1.891701  | -4.042880 | 7.197908  | C | -1.610090 | 7.498640  | 0.797603  |
| <b>TS2-R-C1-r3</b> |           |           |           | O | -1.518790 | 6.327998  | 1.363125  |
| C                  | 2.586961  | -0.512989 | -6.131966 | O | -1.325273 | 7.738403  | -0.382869 |
| C                  | 1.544504  | -1.626419 | -6.003485 | C | -3.715301 | 5.693501  | 4.634303  |
| O                  | 1.173455  | -2.270159 | -6.991786 | C | -2.246348 | 5.582666  | 5.090833  |
| N                  | 1.066879  | -1.847647 | -4.749074 | O | -1.972381 | 5.287282  | 6.260467  |
| C                  | 0.097308  | -2.900187 | -4.466816 | C | -4.553999 | 4.607599  | 5.329399  |
| C                  | -1.332495 | -2.339963 | -4.428418 | N | -1.304397 | 5.815045  | 4.142964  |
| O                  | -1.585866 | -1.318665 | -3.763248 | C | 0.118498  | 5.532106  | 4.347798  |
| C                  | 0.435641  | -3.609436 | -3.131258 | C | 0.661037  | 4.483982  | 3.356857  |
| C                  | -0.432775 | -4.821761 | -2.870694 | C | -0.201874 | 3.220945  | 3.315212  |
| C                  | -0.087748 | -6.076091 | -3.396209 | C | -3.912411 | 5.457717  | -1.488996 |
| C                  | -1.612428 | -4.715729 | -2.120926 | C | -2.838466 | 4.421896  | -1.445206 |
| C                  | -0.901388 | -7.192121 | -3.186995 | C | -2.590836 | 3.313452  | -2.218214 |
| C                  | -2.430327 | -5.827507 | -1.912117 | N | -1.815968 | 4.462641  | -0.520325 |
| C                  | -2.079397 | -7.069728 | -2.446862 | C | -0.997521 | 3.421623  | -0.748317 |
| N                  | -2.303421 | -2.994130 | -5.107827 | N | -1.440584 | 2.696546  | -1.770879 |
| C                  | -2.200837 | -4.248630 | -5.909146 | O | -0.041791 | 0.975598  | -2.889593 |
|                    |           |           |           | O | 0.033018  | -1.283653 | 1.397689  |

H 2.991579 -0.198104 -5.169242  
H 2.126394 0.349310 -6.624834  
H 1.486665 -3.911294 -3.188282  
H 0.348348 -2.903938 -2.301528  
H 0.830981 -6.179270 -3.969067  
H -1.877356 -3.757753 -1.684800  
H -0.612401 -8.155704 -3.597427  
H -3.335709 -5.726125 -1.320040  
H -2.712158 -7.936457 -2.278587  
H 0.187286 -3.615654 -5.286327  
H -3.791915 -5.211291 -7.067117  
H -4.030377 -5.238761 -5.312759  
H -4.258093 -2.794162 -7.147906  
H -5.469920 -3.366271 -5.991323  
H -3.681772 -1.398034 -5.254665  
H -4.128107 -2.652224 -4.093396  
H -1.652776 -5.017868 -5.364747  
H 2.003597 1.811071 -4.155409  
H 1.488963 2.943092 -2.920752  
H 3.691498 3.003924 -1.879407  
H 5.810151 -2.832716 -2.975556  
H 4.137480 -2.312600 -2.968078  
H 2.869544 -2.935283 -0.645236  
H 7.964574 -2.065845 -1.133794  
H 9.386809 -2.429939 0.856606  
H 5.950952 -3.534730 3.223815  
H 8.400299 -3.150541 3.011346  
H 6.453036 -0.460209 -2.185535  
H -2.999683 -5.334052 3.569605  
H -3.596770 -2.953962 7.103165  
H -1.674643 -3.503178 2.553621  
H -2.274699 -1.120868 6.076310  
H -0.816135 -1.308502 2.843149  
H -0.665441 -5.088472 8.477648  
H 1.534615 -4.656377 6.380281  
H -0.136347 -4.074878 6.245529  
H 0.683183 -7.111624 6.582551  
H -8.969245 -3.274004 -3.824199  
H -6.669261 -2.682142 -3.050055  
H -9.069541 -1.205155 -1.544934  
H 2.153752 -7.687096 0.466978  
H 2.362202 -5.316085 4.046287  
H 1.078730 -5.805121 -0.716210  
H 1.274570 -3.432492 2.869388  
H 0.279171 -2.199782 0.937940  
H -2.040337 9.563593 1.232738  
H -1.726567 8.566449 2.669715  
H -4.228794 8.371971 0.887102  
H -4.430304 4.675287 6.411881  
H -5.615396 4.717595 5.086052  
H -4.086409 6.688945 4.907595  
H 0.262360 2.478852 2.663515  
H -0.314502 2.782282 4.312945  
H -1.200653 3.444920 2.928892  
H 0.225150 5.174295 5.374303  
H -4.533760 5.322026 -2.377416  
H -4.564909 5.404762 -0.609483  
H -3.153393 2.928639 -3.056050  
H -0.095459 3.227448 -0.188820  
H -0.728708 1.703703 -2.346994  
H -4.182116 9.079564 2.507557  
H -10.182199 -1.330291 -2.908967  
H 3.394936 -0.869099 -6.775232

H 5.979585 -0.711540 -3.852472  
H 3.795243 3.381043 -3.588328  
H 2.817796 -7.467212 2.866921  
H -0.493125 -7.505892 7.845336  
H 0.708241 6.451006 4.241470  
H -3.973056 -5.083882 5.852080  
H -1.671652 5.207477 0.213695  
H -0.417126 0.075629 -3.005715  
H -0.986538 -6.543136 6.443137  
H -1.590642 6.045702 3.185377  
H 1.385974 -1.253259 -3.973900  
H 3.598603 -0.036903 -2.570387  
H 3.566547 -3.523395 1.654672  
C 0.065195 -0.189300 0.501291  
C 1.495369 0.172026 0.048885  
H -0.519973 -0.392530 -0.406452  
H -0.396360 0.674527 0.995043  
C 4.302006 1.416889 3.081883  
C 3.073380 0.898364 3.485359  
C 4.637511 1.528631 1.731484  
C 2.158415 0.493654 2.516149  
H 2.844168 0.815643 4.539970  
C 3.711257 1.124397 0.779608  
H 5.605682 1.919479 1.446207  
C 2.454705 0.611620 1.148590  
H 1.218093 0.062624 2.830778  
H 3.970657 1.188896 -0.269497  
H 1.921091 -0.708342 -0.441886  
H -3.474692 6.461041 -1.514822  
H -3.903983 7.345249 2.288567  
H -3.782847 5.605593 3.546393  
H -8.498176 -0.864551 -3.182462  
H -1.676287 -4.042265 -6.849787  
H 1.663981 4.212033 3.711926  
O 0.864373 5.023195 2.051047  
H 0.051020 5.491539 1.767979  
H -4.236157 3.608259 5.016060  
H -9.439021 -3.620090 -2.168549  
C -6.999500 -4.791016 -2.835166  
H -7.197128 -4.970969 -3.897985  
H -5.949733 -5.038005 -2.641766  
H -7.616315 -5.492187 -2.259082  
C -6.974242 -3.094889 -0.966107  
H -7.114790 -2.049032 -0.677457  
H -7.608790 -3.709963 -0.315394  
H -5.931686 -3.355553 -0.754942  
N 5.265174 1.842140 4.094146  
O 4.959016 1.715996 5.284095  
O 6.343567 2.309699 3.715383  
H 0.994246 -5.651649 8.628355  
C 1.578026 -1.708690 6.510984  
H 0.738397 -1.550236 5.830130  
H 1.865882 -0.752515 6.953337  
H 2.430221 -2.114503 5.960135  
S 1.109925 -2.813617 7.891440

**Int2-R-C1-r3**

C 2.606203 -0.523099 -6.119501  
C 1.542544 -1.617806 -5.988024  
O 1.139445 -2.234587 -6.982497  
N 1.090559 -1.859603 -4.728606  
C 0.111076 -2.908091 -4.459295  
C -1.316493 -2.342965 -4.433846

|   |           |           |           |   |           |           |           |
|---|-----------|-----------|-----------|---|-----------|-----------|-----------|
| O | -1.567310 | -1.316565 | -3.777490 | C | 0.633608  | 4.463196  | 3.368245  |
| C | 0.431335  | -3.623829 | -3.121484 | C | -0.240375 | 3.207503  | 3.354317  |
| C | -0.397679 | -4.873117 | -2.911302 | C | -3.904793 | 5.453294  | -1.500381 |
| C | 0.022471  | -6.104180 | -3.437169 | C | -2.798621 | 4.452684  | -1.446570 |
| C | -1.613725 | -4.826472 | -2.215221 | C | -2.520473 | 3.363852  | -2.230954 |
| C | -0.752913 | -7.255373 | -3.281470 | N | -1.787705 | 4.515744  | -0.505289 |
| C | -2.394612 | -5.973364 | -2.062005 | C | -0.932305 | 3.514311  | -0.713409 |
| C | -1.968538 | -7.191680 | -2.596616 | N | -1.358354 | 2.796292  | -1.753200 |
| N | -2.286927 | -2.999311 | -5.113857 | O | 0.100909  | 0.922965  | -2.867837 |
| C | -2.182819 | -4.257495 | -5.907792 | O | 0.061591  | -1.253490 | 1.424023  |
| C | -3.648746 | -4.640852 | -6.149124 | H | 2.983568  | -0.182865 | -5.154716 |
| C | -4.376189 | -3.288160 | -6.186693 | H | 2.174807  | 0.326111  | -6.658830 |
| C | -3.665919 | -2.478384 | -5.096651 | H | 1.494029  | -3.886103 | -3.147255 |
| C | 3.613105  | 2.561296  | -2.870496 | H | 0.288769  | -2.933887 | -2.285953 |
| C | 4.795318  | 1.577438  | -3.006208 | H | 0.969694  | -6.160482 | -3.968467 |
| O | 5.912691  | 2.002403  | -3.336249 | H | -1.937168 | -3.887641 | -1.776813 |
| C | 2.159163  | 2.074776  | -3.142558 | H | -0.405825 | -8.199974 | -3.691005 |
| C | 1.493842  | 0.867697  | -2.386951 | H | -3.331522 | -5.917822 | -1.514741 |
| O | 1.444666  | 1.254362  | -0.953262 | H | -2.572995 | -8.085459 | -2.470892 |
| O | 1.988517  | -0.329975 | -2.587190 | H | 0.205852  | -3.624051 | -5.278166 |
| N | 4.566703  | 0.282045  | -2.683660 | H | -3.772173 | -5.226972 | -7.063336 |
| C | 5.609698  | -0.732494 | -2.799803 | H | -4.014308 | -5.241601 | -5.309194 |
| C | 5.076793  | -2.169425 | -2.641910 | H | -4.234388 | -2.809763 | -7.162351 |
| C | 4.983138  | -2.673077 | -1.229518 | H | -5.450812 | -3.371912 | -6.005873 |
| C | 3.847406  | -2.997534 | -0.524733 | H | -3.660998 | -1.401287 | -5.278452 |
| C | 6.093959  | -2.972073 | -0.356432 | H | -4.115268 | -2.644966 | -4.108904 |
| C | 5.546894  | -3.470688 | 0.862872  | H | -1.636991 | -5.024487 | -5.358169 |
| C | 7.493308  | -2.886637 | -0.482770 | H | 2.065215  | 1.816956  | -4.202394 |
| N | 4.179359  | -3.470226 | 0.728017  | H | 1.509306  | 2.942979  | -2.986132 |
| C | 6.354022  | -3.870237 | 1.935175  | H | 3.671656  | 2.974565  | -1.855215 |
| C | 8.297411  | -3.282823 | 0.580504  | H | 5.759792  | -2.822486 | -3.201833 |
| C | 7.732532  | -3.768381 | 1.779115  | H | 4.103779  | -2.251998 | -3.138094 |
| C | -3.408093 | -4.278294 | 5.409095  | H | 2.808270  | -2.939106 | -0.815915 |
| C | -2.819618 | -4.427440 | 4.147397  | H | 7.943226  | -2.517270 | -1.400548 |
| C | -3.271650 | -3.052392 | 6.070078  | H | 9.378302  | -3.218077 | 0.490377  |
| C | -2.104456 | -3.385274 | 3.549689  | H | 5.915857  | -4.249347 | 2.853838  |
| C | -2.562151 | -2.003194 | 5.487699  | H | 8.385357  | -4.069209 | 2.593803  |
| C | -1.968488 | -2.158236 | 4.221753  | H | 6.398334  | -0.543719 | -2.060583 |
| O | -1.287999 | -1.101053 | 3.718996  | H | -2.912952 | -5.370479 | 3.614952  |
| C | -0.190982 | -6.722519 | 7.159769  | H | -3.721316 | -2.908622 | 7.049208  |
| C | 0.469213  | -5.504520 | 7.816412  | H | -1.646135 | -3.512990 | 2.572307  |
| C | 0.597754  | -4.327775 | 6.845964  | H | -2.455493 | -1.050165 | 5.997053  |
| C | -9.142564 | -1.520511 | -2.611312 | H | -0.876597 | -1.271657 | 2.824967  |
| C | -8.438380 | -2.847103 | -2.305602 | H | -0.118331 | -5.193275 | 8.689304  |
| C | -7.063899 | -2.712886 | -1.620469 | H | 1.200087  | -4.608181 | 5.975360  |
| C | 2.336574  | -6.644186 | 2.362143  | H | -0.387235 | -4.014972 | 6.485860  |
| C | 2.165681  | -5.405842 | 2.991958  | H | 0.397749  | -7.078717 | 6.307091  |
| C | 1.804138  | -6.807107 | 1.076140  | H | -8.305357 | -3.402100 | -3.244014 |
| C | 1.490062  | -4.354239 | 2.363300  | H | -6.435664 | -2.074423 | -2.260712 |
| C | 1.131851  | -5.773415 | 0.434415  | H | -9.390203 | -0.968756 | -1.699153 |
| C | 0.943266  | -4.496525 | 1.048623  | H | 1.922835  | -7.759560 | 0.561783  |
| O | 0.317033  | -3.536036 | 0.423776  | H | 2.574416  | -5.247888 | 3.989025  |
| C | -3.721052 | 8.327994  | 1.843212  | H | 0.730809  | -5.915092 | -0.564284 |
| C | -2.217748 | 8.586700  | 1.662659  | H | 1.360542  | -3.402135 | 2.873261  |
| C | -1.628460 | 7.498944  | 0.769641  | H | 0.212544  | -2.193583 | 0.988731  |
| O | -1.537626 | 6.327343  | 1.341624  | H | -2.047967 | 9.563736  | 1.201737  |
| O | -1.360432 | 7.723869  | -0.416093 | H | -1.720721 | 8.570598  | 2.639151  |
| C | -3.725342 | 5.694137  | 4.623315  | H | -4.237182 | 8.363729  | 0.877481  |
| C | -2.257842 | 5.591948  | 5.087158  | H | -4.439705 | 4.688838  | 6.408504  |
| O | -1.986941 | 5.301273  | 6.258002  | H | -5.620501 | 4.709593  | 5.078279  |
| C | -4.559310 | 4.609226  | 5.326491  | H | -4.102506 | 6.689902  | 4.886664  |
| N | -1.311695 | 5.826630  | 4.143060  | H | 0.208410  | 2.453036  | 2.706011  |
| C | 0.109101  | 5.531542  | 4.347854  | H | -0.342108 | 2.782584  | 4.359031  |

|   |            |           |           |                    |           |           |           |
|---|------------|-----------|-----------|--------------------|-----------|-----------|-----------|
| H | -1.242927  | 3.434845  | 2.979618  | O                  | 4.980211  | 1.800434  | 5.233065  |
| H | 0.214919   | 5.184271  | 5.377881  | O                  | 6.380710  | 2.327724  | 3.655055  |
| H | -4.518766  | 5.289192  | -2.388314 | <b>TS3-R-C1-r3</b> |           |           |           |
| H | -4.552352  | 5.383057  | -0.619505 | C                  | 2.332964  | -0.599963 | -6.312729 |
| H | -3.046651  | 2.958158  | -3.079911 | C                  | 1.125000  | -1.543970 | -6.264400 |
| H | -0.030980  | 3.325067  | -0.151761 | O                  | 0.585157  | -1.967011 | -7.292634 |
| H | -0.827339  | 1.979510  | -2.169338 | N                  | 0.705305  | -1.868132 | -5.014751 |
| H | -4.179446  | 9.081023  | 2.493018  | C                  | -0.454499 | -2.703221 | -4.738757 |
| H | -10.077537 | -1.689109 | -3.156242 | C                  | -1.742869 | -1.865074 | -4.718573 |
| H | 3.429221   | -0.913060 | -6.723876 | O                  | -1.778217 | -0.792354 | -4.087127 |
| H | 6.089731   | -0.627292 | -3.782082 | C                  | -0.226339 | -3.398640 | -3.368052 |
| H | 3.831203   | 3.386932  | -3.552650 | C                  | -1.372097 | -4.261884 | -2.885108 |
| H | 2.866579   | -7.452629 | 2.856924  | C                  | -1.597061 | -5.535172 | -3.430922 |
| H | -0.285962  | -7.549043 | 7.871218  | C                  | -2.227594 | -3.811391 | -1.869976 |
| H | 0.708026   | 6.442683  | 4.228627  | C                  | -2.659693 | -6.327151 | -2.992399 |
| H | -3.963133  | -5.094587 | 5.860720  | C                  | -3.289802 | -4.602564 | -1.425899 |
| H | -1.669739  | 5.273113  | 0.252615  | C                  | -3.513870 | -5.860092 | -1.990358 |
| H | -0.228113  | 0.011418  | -3.002623 | N                  | -2.830795 | -2.326998 | -5.375593 |
| H | -1.192615  | -6.476706 | 6.790926  | C                  | -2.969297 | -3.566161 | -6.192157 |
| H | -1.598696  | 6.049423  | 3.185923  | C                  | -4.475731 | -3.634840 | -6.474126 |
| H | 1.428405   | -1.276290 | -3.941600 | C                  | -4.906768 | -2.160399 | -6.499968 |
| H | 3.581229   | -0.042088 | -2.576583 | C                  | -4.073429 | -1.531500 | -5.378320 |
| H | 3.503139   | -3.807940 | 1.405790  | C                  | 3.895721  | 2.022919  | -2.883101 |
| C | 0.084450   | -0.185650 | 0.490288  | C                  | 4.885205  | 0.884895  | -3.216807 |
| C | 1.505977   | 0.193494  | 0.016339  | O                  | 5.974580  | 1.144960  | -3.743366 |
| H | -0.502772  | -0.424141 | -0.407318 | C                  | 2.425393  | 1.965705  | -3.368210 |
| H | -0.387163  | 0.686741  | 0.960726  | C                  | 1.456875  | 0.826431  | -3.000532 |
| C | 4.326823   | 1.452149  | 3.036624  | O                  | 1.094273  | 1.220119  | -1.122441 |
| C | 3.090319   | 0.959061  | 3.448663  | O                  | 1.814050  | -0.383365 | -2.969582 |
| C | 4.665381   | 1.528332  | 1.683835  | N                  | 4.539359  | -0.366364 | -2.814933 |
| C | 2.172007   | 0.544027  | 2.486932  | C                  | 5.359000  | -1.531406 | -3.140800 |
| H | 2.858752   | 0.902672  | 4.504501  | C                  | 4.952836  | -2.796003 | -2.369135 |
| C | 3.734328   | 1.117193  | 0.740102  | C                  | 5.313270  | -2.814631 | -0.911584 |
| H | 5.639213   | 1.899840  | 1.391490  | C                  | 4.430220  | -2.887901 | 0.138655  |
| C | 2.469894   | 0.627777  | 1.116495  | C                  | 6.637884  | -2.805891 | -0.335309 |
| H | 1.226673   | 0.129901  | 2.809554  | C                  | 6.477001  | -2.865730 | 1.080811  |
| H | 3.991042   | 1.157288  | -0.310844 | C                  | 7.942872  | -2.771073 | -0.861277 |
| H | 1.936713   | -0.684214 | -0.479972 | N                  | 5.124836  | -2.918371 | 1.332924  |
| H | -3.494922  | 6.467587  | -1.532627 | C                  | 7.566255  | -2.874313 | 1.958939  |
| H | -3.899255  | 7.346124  | 2.283052  | C                  | 9.028809  | -2.783880 | 0.008123  |
| H | -3.788818  | 5.595831  | 3.535961  | C                  | 8.842395  | -2.831149 | 1.405317  |
| H | -8.510970  | -0.871838 | -3.229576 | C                  | -3.867202 | -4.313117 | 5.130742  |
| H | -1.655590  | -4.056632 | -6.848215 | C                  | -3.627558 | -4.331822 | 3.752155  |
| H | 1.638030   | 4.188286  | 3.715990  | C                  | -3.178678 | -3.380280 | 5.915037  |
| O | 0.826069   | 4.980544  | 2.050186  | C                  | -2.716911 | -3.450684 | 3.161061  |
| H | 0.030200   | 5.484420  | 1.783082  | C                  | -2.265576 | -2.497297 | 5.340019  |
| H | -4.233301  | 3.609168  | 5.024333  | C                  | -2.016363 | -2.527314 | 3.955683  |
| H | -9.088656  | -3.470703 | -1.674762 | O                  | -1.094131 | -1.661320 | 3.472088  |
| C | -6.379584  | -4.083484 | -1.511575 | C                  | -1.020411 | -7.351804 | 6.562203  |
| H | -5.384644  | -3.994971 | -1.062045 | C                  | -0.126418 | -6.313762 | 7.251195  |
| H | -6.967563  | -4.764915 | -0.883966 | C                  | 0.419418  | -5.283373 | 6.260351  |
| H | -6.264124  | -4.552912 | -2.494928 | C                  | -9.326082 | -0.076260 | -2.423558 |
| C | -7.156978  | -2.047933 | -0.238995 | C                  | -9.016270 | -1.570274 | -2.277261 |
| H | -7.570822  | -1.036511 | -0.293862 | C                  | -7.520197 | -1.936417 | -2.338113 |
| H | -7.796368  | -2.635335 | 0.432248  | C                  | 1.354305  | -7.272678 | 1.687061  |
| H | -6.168470  | -1.973619 | 0.226365  | C                  | 0.616732  | -6.268040 | 2.327331  |
| H | 1.463144   | -5.778875 | 8.190559  | C                  | 2.012078  | -6.938938 | 0.495025  |
| C | 1.629636   | -1.779102 | 6.231283  | C                  | 0.542786  | -4.974221 | 1.810822  |
| H | 2.074016   | -0.857462 | 6.613429  | C                  | 1.940444  | -5.653285 | -0.037351 |
| H | 2.309941   | -2.223567 | 5.500154  | C                  | 1.203196  | -4.608769 | 0.599586  |
| H | 0.675376   | -1.545668 | 5.753917  | O                  | 1.167287  | -3.399341 | 0.096116  |
| S | 1.405439   | -2.891330 | 7.666505  | C                  | -2.322300 | 8.439999  | 2.541196  |
| N | 5.292291   | 1.887937  | 4.040473  | C                  | -0.849345 | 8.816520  | 2.731909  |

|   |           |           |           |   |            |           |           |
|---|-----------|-----------|-----------|---|------------|-----------|-----------|
| C | 0.105437  | 7.918708  | 1.933054  | H | 0.189609   | -2.302862 | 0.507963  |
| O | -0.149957 | 6.641643  | 2.039514  | H | -0.665677  | 9.858662  | 2.454197  |
| O | 1.026616  | 8.407858  | 1.274510  | H | -0.582489  | 8.712045  | 3.792900  |
| C | -2.657300 | 5.621889  | 5.112588  | H | -2.634899  | 8.594537  | 1.501831  |
| C | -1.250575 | 5.091821  | 5.454592  | H | -3.586147  | 4.736062  | 6.862862  |
| O | -1.051764 | 4.428453  | 6.478503  | H | -4.739159  | 5.212651  | 5.596276  |
| C | -3.750499 | 4.782707  | 5.784408  | H | -2.717569  | 6.664772  | 5.449711  |
| N | -0.268750 | 5.419944  | 4.576048  | H | 0.747394   | 2.124761  | 2.598447  |
| C | 1.096602  | 4.899898  | 4.672903  | H | 0.239498   | 2.314522  | 4.286410  |
| C | 1.470718  | 3.939500  | 3.538695  | H | -0.534493  | 3.277086  | 3.018886  |
| C | 0.416760  | 2.847101  | 3.345847  | H | 1.167275   | 4.384578  | 5.633476  |
| C | -3.042201 | 5.905898  | -0.999700 | H | -3.767231  | 5.569803  | -1.743806 |
| C | -1.943573 | 4.895107  | -0.856756 | H | -3.568597  | 6.054458  | -0.051180 |
| C | -1.697994 | 3.694994  | -1.482179 | H | -2.255237  | 3.187072  | -2.253026 |
| N | -0.902453 | 5.065657  | 0.039768  | H | 0.807737   | 3.896576  | 0.569033  |
| C | -0.075974 | 4.017487  | -0.043366 | H | 0.034214   | 2.221378  | -1.122081 |
| N | -0.531771 | 3.167507  | -0.957201 | H | -2.975285  | 9.049462  | 3.175320  |
| O | 0.228814  | 1.146648  | -3.508201 | H | -10.406826 | 0.101044  | -2.430239 |
| O | -0.428448 | -1.550240 | 0.850150  | H | 3.035483   | -0.970572 | -7.062996 |
| H | 2.831883  | -0.504739 | -5.348471 | H | 5.296243   | -1.744000 | -4.219200 |
| H | 1.992702  | 0.388573  | -6.637837 | H | 4.343574   | 2.925914  | -3.302526 |
| H | 0.681467  | -4.002920 | -3.469135 | H | 1.409057   | -8.276822 | 2.097214  |
| H | -0.008919 | -2.629650 | -2.622346 | H | -1.410510  | -8.075586 | 7.285386  |
| H | -0.924592 | -5.914333 | -4.197062 | H | 1.809910   | 5.733106  | 4.679442  |
| H | -2.040913 | -2.848374 | -1.403184 | H | -4.577933  | -5.000058 | 5.579127  |
| H | -2.813435 | -7.311930 | -3.424689 | H | -0.733551  | 5.828986  | 0.740780  |
| H | -3.935084 | -4.239500 | -0.630986 | H | -0.333952  | 0.340901  | -3.558393 |
| H | -4.336531 | -6.477606 | -1.641615 | H | -1.874501  | -6.871403 | 6.072577  |
| H | -0.514032 | -3.452506 | -5.531015 | H | -0.493553  | 5.935971  | 3.720302  |
| H | -4.691896 | -4.167690 | -7.403534 | H | 1.138322   | -1.390700 | -4.214947 |
| H | -4.981264 | -4.161232 | -5.657109 | H | 3.538188   | -0.521053 | -2.654002 |
| H | -4.642537 | -1.707217 | -7.461890 | H | 4.698854   | -2.949970 | 2.244900  |
| H | -5.979890 | -2.022827 | -6.345394 | C | -0.292694  | -0.325446 | 0.136561  |
| H | -3.839001 | -0.476921 | -5.537914 | C | 1.150598   | 0.099852  | -0.283704 |
| H | -4.571645 | -1.617066 | -4.404054 | H | -0.865743  | -0.360547 | -0.802325 |
| H | -2.609565 | -4.438048 | -5.644182 | H | -0.733572  | 0.463186  | 0.759516  |
| H | 2.421767  | 1.957336  | -4.466341 | C | 3.880738   | 0.772231  | 3.000635  |
| H | 1.946079  | 2.904633  | -3.078366 | C | 3.149718   | -0.417573 | 2.960125  |
| H | 3.902078  | 2.134280  | -1.792343 | C | 3.754318   | 1.735876  | 1.999968  |
| H | 5.437615  | -3.639303 | -2.881001 | C | 2.275398   | -0.640088 | 1.903871  |
| H | 3.873557  | -2.957142 | -2.479372 | H | 3.270967   | -1.145884 | 3.751920  |
| H | 3.345560  | -2.939507 | 0.124558  | C | 2.863557   | 1.501722  | 0.958179  |
| H | 8.104445  | -2.737673 | -1.935202 | H | 4.331784   | 2.649735  | 2.052548  |
| H | 10.038225 | -2.755724 | -0.392941 | C | 2.103600   | 0.323816  | 0.890556  |
| H | 7.419355  | -2.913844 | 3.034539  | H | 1.723455   | -1.568822 | 1.855238  |
| H | 9.708666  | -2.835342 | 2.060898  | H | 2.730558   | 2.239202  | 0.177745  |
| H | 6.402857  | -1.274058 | -2.940892 | H | 1.556209   | -0.750087 | -0.859815 |
| H | -4.152950 | -5.043387 | 3.120450  | H | -2.648748  | 6.876631  | -1.319094 |
| H | -3.351062 | -3.338095 | 6.987319  | H | -2.488488  | 7.390589  | 2.783888  |
| H | -2.535176 | -3.479589 | 2.090628  | H | -2.789353  | 5.636436  | 4.026249  |
| H | -1.729581 | -1.774798 | 5.947761  | H | -8.919430  | 0.321525  | -3.360822 |
| H | -0.955180 | -1.709036 | 2.487253  | H | -2.387332  | -3.464920 | -7.116051 |
| H | -0.697678 | -5.798106 | 8.033030  | H | -3.747183  | 3.756822  | 5.403886  |
| H | 1.020147  | -5.772421 | 5.486213  | H | 2.416123   | 3.465871  | 3.831497  |
| H | -0.402823 | -4.752068 | 5.770842  | O | 1.761080   | 4.640545  | 2.324680  |
| H | -0.466364 | -7.908404 | 5.798263  | H | 1.149182   | 5.406909  | 2.226341  |
| H | -9.540390 | -2.119803 | -3.070868 | H | -9.431461  | -1.939800 | -1.328292 |
| H | -7.118668 | -1.532043 | -3.280614 | C | -7.340300  | -3.461468 | -2.368281 |
| H | -8.903148 | 0.512423  | -1.603530 | H | -7.871719  | -3.910179 | -3.215284 |
| H | 2.593090  | -7.695825 | -0.030130 | H | -6.283435  | -3.738002 | -2.448013 |
| H | 0.084338  | -6.495368 | 3.249341  | H | -7.732443  | -3.918257 | -1.450833 |
| H | 2.458091  | -5.414186 | -0.963365 | C | -6.716369  | -1.322117 | -1.182431 |
| H | -0.023024 | -4.211320 | 2.338478  | H | -6.769053  | -0.229174 | -1.177704 |

H -7.092102 -1.679011 -0.215174  
H -5.659144 -1.600074 -1.249918  
H 0.708100 -6.817898 7.754085  
S 1.473479 -4.040636 7.115013  
C 1.942972 -2.996978 5.687545  
H 2.591508 -2.205263 6.068854  
H 2.492495 -3.583815 4.946846  
H 1.063724 -2.548102 5.219007  
N 4.785045 1.014120 4.116367  
O 4.946801 0.114316 4.949098  
O 5.350551 2.111378 4.187324

**Prod-R-C1-r3**

C 2.335702 -0.383008 -6.199299  
C 1.342808 -1.538902 -6.075596  
O 0.856565 -2.085791 -7.068029  
N 1.005060 -1.924162 -4.805013  
C -0.120502 -2.832786 -4.575906  
C -1.435487 -2.077245 -4.860408  
O -1.555224 -0.889313 -4.500878  
C -0.070656 -3.348055 -3.117317  
C -1.051208 -4.463861 -2.825367  
C -0.731813 -5.791258 -3.150768  
C -2.294191 -4.201536 -2.234954  
C -1.633895 -6.827348 -2.902605  
C -3.197701 -5.236126 -1.981080  
C -2.872389 -6.551529 -2.317948  
N -2.444382 -2.725097 -5.476880  
C -2.459101 -4.111608 -6.017100  
C -3.935874 -4.331799 -6.366289  
C -4.423145 -2.929819 -6.763596  
C -3.702733 -2.010141 -5.770710  
C 3.444487 2.552921 -2.847487  
C 4.329954 1.432171 -3.406581  
O 4.703424 1.468050 -4.584591  
C 2.076712 2.598002 -3.559333  
C 1.265036 1.314272 -3.480616  
O 1.084587 1.517159 0.045598  
O 1.624755 0.297938 -2.899354  
N 4.673506 0.430221 -2.550559  
C 5.430427 -0.745514 -2.978035  
C 4.628740 -2.067938 -3.055788  
C 4.625083 -2.888375 -1.797626  
C 3.552106 -3.201881 -0.995388  
C 5.766059 -3.557723 -1.216474  
C 5.302206 -4.251128 -0.060759  
C 7.126939 -3.657808 -1.562754  
N 3.951848 -4.016042 0.044690  
C 6.153862 -5.019236 0.742834  
C 7.975767 -4.418405 -0.766303  
C 7.493628 -5.091001 0.376977  
C -3.366414 -4.628006 5.318002  
C -2.776123 -4.533544 4.053721  
C -3.043496 -3.671333 6.286067  
C -1.872935 -3.512806 3.750534  
C -2.142664 -2.646421 6.000963  
C -1.544254 -2.559402 4.731220  
O -0.664767 -1.553572 4.517523  
C -0.110196 -7.154698 6.868100  
C 0.751825 -6.116704 7.596264  
C 1.093792 -4.927448 6.695950  
C -9.313599 -1.505900 -2.408500  
C -8.940396 -2.941214 -2.023309

C -7.654417 -3.477211 -2.682235  
C 2.281999 -6.871119 2.009110  
C 2.366452 -5.675223 2.729041  
C 1.442636 -6.913922 0.887757  
C 1.643789 -4.543456 2.341366  
C 0.715548 -5.798297 0.488350  
C 0.789902 -4.561153 1.195293  
O 0.111525 -3.516630 0.793124  
C -3.733583 8.123793 2.320103  
C -2.331614 8.711878 2.510318  
C -1.246546 7.943519 1.738652  
O -1.312849 6.650367 1.867980  
O -0.400486 8.557017 1.078036  
C -3.669450 5.369947 4.980685  
C -2.201770 5.069626 5.346248  
O -1.914013 4.482285 6.395606  
C -4.646308 4.540532 5.821312  
N -1.272111 5.507250 4.458256  
C 0.155239 5.210546 4.590516  
C 0.723521 4.370042 3.435150  
C -0.136672 3.140752 3.145775  
C -4.021500 5.399600 -1.140101  
C -2.807142 4.533088 -0.998386  
C -2.453475 3.318348 -1.547433  
N -1.735239 4.884291 -0.203124  
C -0.811305 3.897035 -0.295004  
N -1.203704 2.921669 -1.101867  
O 0.124838 1.387947 -4.172499  
O 0.462189 -1.471997 2.140407  
H 3.030389 -0.303628 -5.363995  
H 1.768501 0.551038 -6.266697  
H 0.950543 -3.700601 -2.939838  
H -0.245224 -2.504995 -2.440735  
H 0.235188 -6.013708 -3.595342  
H -2.549598 -3.182267 -1.958692  
H -1.366047 -7.848748 -3.157461  
H -4.150805 -5.014471 -1.510640  
H -3.572774 -7.356639 -2.116003  
H -0.009913 -3.667937 -5.269864  
H -4.061727 -5.076393 -7.156250  
H -4.475457 -4.682616 -5.479897  
H -4.107982 -2.697422 -7.786877  
H -5.509314 -2.821041 -6.712885  
H -3.481855 -1.016887 -6.167566  
H -4.277288 -1.878265 -4.845795  
H -2.090441 -4.824983 -5.280411  
H 2.213246 2.823408 -4.622554  
H 1.459825 3.404493 -3.148930  
H 3.288212 2.442093 -1.770789  
H 5.079183 -2.663690 -3.861801  
H 3.604339 -1.851213 -3.371414  
H 2.513617 -2.913400 -1.079518  
H 7.512291 -3.151107 -2.443604  
H 9.027530 -4.499227 -1.026270  
H 5.775422 -5.543728 1.615091  
H 8.180462 -5.677650 0.980450  
H 6.288892 -0.874907 -2.310276  
H -3.016347 -5.266359 3.287531  
H -3.494962 -3.722324 7.273617  
H -1.418113 -3.452396 2.765317  
H -1.886331 -1.901723 6.748538  
H -0.270433 -1.585023 3.594165  
H 0.222214 -5.757881 8.487491

H 1.648956 -5.262541 5.813252  
H 0.180493 -4.431277 6.353197  
H 0.407217 -7.550530 5.987288  
H -9.771162 -3.608095 -2.290813  
H -7.775925 -3.379633 -3.772272  
H -8.564551 -0.782763 -2.071658  
H 1.358621 -7.834718 0.313258  
H 3.010450 -5.616006 3.604675  
H 0.071144 -5.843183 -0.384571  
H 1.719117 -3.624960 2.916598  
H 0.324007 -2.334374 1.531727  
H -2.297943 9.763254 2.208475  
H -2.063456 8.672470 3.575548  
H -4.052718 8.202102 1.274250  
H -4.477549 4.710929 6.886836  
H -5.680947 4.805937 5.582626  
H -3.846301 6.441866 5.135570  
H 0.301327 2.570363 2.327021  
H -0.213171 2.497851 4.030152  
H -1.148719 3.433490 2.851664  
H 0.274993 4.673885 5.534487  
H -4.758451 4.911397 -1.782945  
H -4.495778 5.593982 -0.171075  
H -3.027076 2.713816 -2.237617  
H 0.113593 3.930825 0.261120  
H 0.231670 1.521171 -0.431667  
H -4.474895 8.650813 2.931108  
H -10.270737 -1.216739 -1.961778  
H 2.892858 -0.506767 -7.129238  
H 5.814675 -0.490271 -3.967205  
H 3.959904 3.500400 -3.025586  
H 2.849902 -7.744996 2.314094  
H -0.347783 -7.998064 7.524829  
H 0.727032 6.144973 4.654195  
H -4.069215 -5.424980 5.541475  
H -1.653475 5.678255 0.455592  
H -0.365196 0.525561 -4.138933  
H -1.054044 -6.714513 6.528738  
H -1.560350 5.951362 3.580155  
H 1.259201 -1.306329 -4.035733  
H 4.218947 0.403713 -1.648937  
H 3.335360 -4.369235 0.769756  
C 0.198557 -0.271192 1.452810  
C 1.391792 0.247969 0.599708  
H -0.664175 -0.373673 0.774827  
H -0.052339 0.500732 2.186480  
C 5.006655 0.630310 2.904347  
C 4.326987 1.784348 2.515411  
C 4.546166 -0.641908 2.558656  
C 3.160012 1.657290 1.767665  
H 4.713237 2.756244 2.794785  
C 3.379746 -0.750499 1.811399  
H 5.101598 -1.518634 2.865808  
C 2.666775 0.392228 1.409463  
H 2.624933 2.544086 1.453156  
H 3.015459 -1.731613 1.536951  
H 1.578663 -0.485418 -0.200065  
H -3.778345 6.371633 -1.585457  
H -3.751123 7.067976 2.591641  
H -3.818936 5.184657 3.911410  
H -9.410339 -1.401262 -3.495687  
H -1.823507 -4.163994 -6.909769  
H 1.716387 4.031125 3.762050

H -4.515715 3.470915 5.633468  
O 0.966223 5.145183 2.262122  
H 0.176189 5.703587 2.065544  
H -8.834459 -3.012154 -0.931155  
C -7.466853 -4.967664 -2.363022  
H -6.578626 -5.373249 -2.859662  
H -7.342615 -5.122403 -1.283922  
H -8.331736 -5.558309 -2.685576  
C -6.409009 -2.676633 -2.273459  
H -6.482171 -1.623300 -2.560482  
H -6.260012 -2.715781 -1.187030  
H -5.508516 -3.084709 -2.745193  
N 6.235769 0.756074 3.682763  
O 6.631636 1.889330 3.974376  
O 6.826370 -0.276218 4.016292  
H 1.677821 -6.586366 7.950597  
C 2.385879 -2.459897 6.278108  
H 1.435319 -2.094935 5.881363  
H 2.933227 -1.627573 6.725718  
H 2.986185 -2.882528 5.468346  
S 2.117394 -3.694985 7.601844

**TS1-R-C2-r3**

C 2.461200 -0.022600 -6.204700  
C 1.501346 -1.205601 -6.104574  
O 1.217608 -1.887080 -7.095210  
N 0.972140 -1.447572 -4.869950  
C -0.010700 -2.507500 -4.660300  
C -1.431731 -1.908567 -4.616564  
O -1.654940 -0.903155 -3.922973  
C 0.289243 -3.257736 -3.337594  
C -0.565193 -4.490016 -3.131297  
C -0.150055 -5.734511 -3.628906  
C -1.794556 -4.416814 -2.460510  
C -0.941756 -6.873397 -3.467623  
C -2.591004 -5.552502 -2.300122  
C -2.167921 -6.784816 -2.803987  
N -2.421926 -2.503930 -5.316175  
C -2.354300 -3.728500 -6.142900  
C -3.830683 -4.072478 -6.383768  
C -4.521170 -2.699640 -6.388773  
C -3.780543 -1.930211 -5.288843  
C 3.581500 2.802800 -2.762900  
C 4.746294 1.820518 -2.952164  
O 5.886793 2.251375 -3.157849  
C 2.135637 2.278216 -2.893541  
C 1.730153 1.171872 -1.897539  
O 1.522923 1.529106 -0.693343  
O 1.656170 -0.020508 -2.319019  
N 4.487541 0.489549 -2.847535  
C 5.549300 -0.501100 -2.992300  
C 5.009602 -1.909416 -3.325684  
C 4.816325 -2.810059 -2.138942  
C 3.681528 -2.973888 -1.380345  
C 5.817423 -3.671305 -1.558276  
C 5.212472 -4.332423 -0.450696  
C 7.160139 -3.958433 -1.867154  
N 3.914277 -3.884656 -0.367317  
C 5.906300 -5.260801 0.335464  
C 7.853295 -4.876421 -1.086882  
C 7.231497 -5.521450 0.004106  
C -3.280100 -4.587600 5.169800  
C -2.717480 -4.516000 3.892339

|   |           |           |           |   |            |           |           |
|---|-----------|-----------|-----------|---|------------|-----------|-----------|
| C | -3.046052 | -3.540562 | 6.068112  | H | 8.890527   | -5.103209 | -1.317100 |
| C | -1.930145 | -3.427220 | 3.508746  | H | 5.421466   | -5.759871 | 1.168950  |
| C | -2.261670 | -2.447980 | 5.700470  | H | 7.798195   | -6.235299 | 0.595233  |
| C | -1.692528 | -2.384763 | 4.417505  | H | 6.161897   | -0.543720 | -2.082299 |
| O | -0.937892 | -1.291970 | 4.125865  | H | -2.890958  | -5.315481 | 3.177026  |
| C | -0.040100 | -7.178700 | 6.645600  | H | -3.478507  | -3.570877 | 7.064534  |
| C | 0.472533  | -6.177232 | 7.686538  | H | -1.505639  | -3.387506 | 2.510440  |
| C | 0.814520  | -4.825075 | 7.057048  | H | -2.082457  | -1.629703 | 6.391133  |
| C | -9.199400 | -1.196800 | -2.464300 | H | -0.526960  | -1.333546 | 3.230894  |
| C | -8.488602 | -2.530804 | -2.211291 | H | -0.287657  | -6.033485 | 8.464250  |
| C | -7.155279 | -2.423532 | -1.444884 | H | 1.609049   | -4.938701 | 6.311170  |
| C | 2.360400  | -6.759400 | 1.800600  | H | -0.063004  | -4.400955 | 6.558429  |
| C | 2.390885  | -5.550615 | 2.499963  | H | 0.708613   | -7.360194 | 5.866559  |
| C | 1.513740  | -6.881711 | 0.693313  | H | -8.295044  | -3.017515 | -3.176657 |
| C | 1.599223  | -4.469996 | 2.097939  | H | -6.507806  | -1.729634 | -2.002583 |
| C | 0.718479  | -5.815901 | 0.280496  | H | -9.503788  | -0.711523 | -1.531732 |
| C | 0.759915  | -4.593762 | 0.974810  | H | 1.476752   | -7.816103 | 0.139894  |
| O | -0.017875 | -3.580403 | 0.528072  | H | 3.035714   | -5.438910 | 3.367463  |
| C | -3.573000 | 8.252100  | 2.564600  | H | 0.067997   | -5.901453 | -0.582940 |
| C | -2.337719 | 8.398539  | 1.674383  | H | 1.620222   | -3.533237 | 2.645901  |
| C | -1.392891 | 7.192996  | 1.767981  | H | 0.188341   | -2.720925 | 1.008815  |
| O | -1.941219 | 6.036941  | 1.825491  | H | -2.649181  | 8.495760  | 0.624845  |
| O | -0.158457 | 7.412359  | 1.790371  | H | -1.772235  | 9.302569  | 1.920488  |
| C | -3.527700 | 5.417600  | 5.139400  | H | -4.131431  | 7.352405  | 2.298079  |
| C | -2.047183 | 5.286588  | 5.531335  | H | -4.153639  | 3.842137  | 6.501050  |
| O | -1.731377 | 5.069476  | 6.709401  | H | -5.356737  | 4.228493  | 5.253038  |
| C | -4.286300 | 4.114900  | 5.450700  | H | -3.945861  | 6.240901  | 5.729525  |
| N | -1.143194 | 5.400044  | 4.526227  | H | 0.963188   | 2.872640  | 2.265609  |
| C | 0.296700  | 5.248900  | 4.749200  | H | 0.056382   | 2.623373  | 3.773640  |
| C | 1.072401  | 4.554787  | 3.607709  | H | -0.593269  | 3.686347  | 2.508897  |
| C | 0.323490  | 3.359352  | 3.006747  | H | 0.403521   | 4.671970  | 5.672122  |
| C | -3.871000 | 5.637100  | -0.978000 | H | -4.648230  | 5.586342  | -1.745256 |
| C | -2.746477 | 4.725529  | -1.329371 | H | -4.321554  | 5.371053  | -0.016271 |
| C | -2.486590 | 3.954928  | -2.437883 | H | -3.088158  | 3.847454  | -3.330551 |
| N | -1.679500 | 4.510371  | -0.482760 | H | 0.079887   | 3.277950  | -0.648321 |
| C | -0.836483 | 3.639706  | -1.094597 | H | -0.767465  | 2.257693  | -3.843734 |
| N | -1.293195 | 3.278375  | -2.286068 | H | -4.239633  | 9.116285  | 2.464490  |
| O | -0.670324 | 1.748553  | -4.677195 | H | -10.101748 | -1.341597 | -3.067884 |
| O | 0.478894  | -1.314965 | 1.740542  | H | 3.095717   | -0.160175 | -7.080719 |
| H | 3.075689  | 0.097300  | -5.309748 | H | 6.210743   | -0.149855 | -3.790784 |
| H | 1.872559  | 0.892531  | -6.330977 | H | 3.747669   | 3.609095  | -3.482812 |
| H | 1.346421  | -3.539390 | -3.360875 | H | 2.979247   | -7.593335 | 2.116453  |
| H | 0.155565  | -2.556741 | -2.507901 | H | -0.279171  | -8.140423 | 7.110918  |
| H | 0.805826  | -5.810664 | -4.141552 | H | 0.765884   | 6.227199  | 4.920885  |
| H | -2.123198 | -3.464161 | -2.055300 | H | -3.893773  | -5.435769 | 5.456709  |
| H | -0.599298 | -7.828474 | -3.856014 | H | -1.577871  | 4.971152  | 0.436941  |
| H | -3.538552 | -5.475238 | -1.774589 | H | -0.908943  | 0.844590  | -4.411898 |
| H | -2.784754 | -7.669427 | -2.674363 | H | -0.946087  | -6.806413 | 6.155456  |
| H | 0.094722  | -3.188334 | -5.505750 | H | -1.474521  | 5.576466  | 3.573263  |
| H | -3.974461 | -4.636810 | -7.308582 | H | 1.172126   | -0.818437 | -4.087315 |
| H | -4.206551 | -4.680069 | -5.553207 | H | 3.536314   | 0.158818  | -2.695603 |
| H | -4.374328 | -2.206522 | -7.356204 | H | 3.234889   | -4.176586 | 0.322429  |
| H | -5.596136 | -2.757388 | -6.200538 | C | 0.621580   | 0.022048  | 0.537719  |
| H | -3.733543 | -0.851852 | -5.456280 | C | 1.663854   | -0.690260 | 1.270753  |
| H | -4.232327 | -2.091754 | -4.301825 | H | 0.238139   | -0.414723 | -0.369894 |
| H | -1.821276 | -4.526236 | -5.623550 | H | 0.095560   | 0.828736  | 1.023714  |
| H | 1.945647  | 1.911240  | -3.903114 | C | 4.203056   | 1.325444  | 4.062050  |
| H | 1.463297  | 3.125061  | -2.734133 | C | 3.135976   | 0.575262  | 4.552998  |
| H | 3.719226  | 3.246946  | -1.768687 | C | 4.446790   | 1.454882  | 2.692680  |
| H | 5.721391  | -2.385289 | -4.009964 | C | 2.296262   | -0.069725 | 3.647932  |
| H | 4.074082  | -1.813441 | -3.888202 | H | 2.976520   | 0.503533  | 5.621107  |
| H | 2.719357  | -2.491783 | -1.484006 | C | 3.603519   | 0.802785  | 1.802383  |
| H | 7.650603  | -3.468318 | -2.704100 | H | 5.280352   | 2.052939  | 2.348071  |



C 2.524614 0.035191 2.271343  
H 1.458335 -0.652368 4.011259  
H 3.765708 0.899757 0.734283  
H 2.280408 -1.346440 0.646320  
H -3.543889 6.680342 -0.900343  
H -3.290798 8.170963 3.619281  
H -3.627393 5.676740 4.082158  
H -8.548327 -0.498893 -3.003486  
H -1.832728 -3.517673 -7.085094  
H 1.989382 4.172833 4.078989  
O 1.526972 5.449261 2.606651  
H 0.798193 6.040458 2.292495  
H -3.914537 3.289288 4.835229  
H -9.160067 -3.206056 -1.660881  
C -6.449811 -3.786882 -1.397838  
H -6.267845 -4.178374 -2.404987  
H -5.484598 -3.715931 -0.884552  
H -7.058535 -4.523748 -0.858828  
C -7.335034 -1.861639 -0.026667  
H -7.765910 -0.855989 -0.033044  
H -7.996927 -2.505930 0.566059  
H -6.374129 -1.803644 0.495450  
N 5.098101 1.990901 5.009348  
O 4.865593 1.870044 6.215597  
O 6.047319 2.637749 4.558891  
H 1.359988 -6.582943 8.187660  
S 1.380922 -3.631981 8.338506  
C 1.683535 -2.166202 7.288305  
H 0.774582 -1.874242 6.757011  
H 1.988253 -1.353146 7.950467  
H 2.483782 -2.359238 6.569498

**Int1-R-C2-r3**

C 2.367508 -0.003096 -6.236306  
C 1.420936 -1.198950 -6.152609  
O 1.211177 -1.930407 -7.123774  
N 0.826585 -1.397406 -4.937846  
C -0.172117 -2.439099 -4.724485  
C -1.572364 -1.801188 -4.633295  
O -1.751277 -0.811801 -3.902443  
C 0.132583 -3.255409 -3.442102  
C -0.762962 -4.466720 -3.286295  
C -0.412591 -5.691423 -3.874488  
C -1.970428 -4.387864 -2.577864  
C -1.247356 -6.805398 -3.764839  
C -2.809774 -5.498230 -2.469559  
C -2.452045 -6.710435 -3.064209  
N -2.590421 -2.340134 -5.336559  
C -2.575503 -3.537395 -6.207400  
C -4.065812 -3.841677 -6.410005  
C -4.724080 -2.454215 -6.355067  
C -3.933013 -1.732789 -5.257349  
C 3.629513 2.689453 -2.737601  
C 4.731706 1.654850 -2.991940  
O 5.870510 2.041828 -3.265443  
C 2.140671 2.270815 -2.764152  
C 1.671807 1.115165 -1.890291  
O 1.419084 1.435820 -0.614788  
O 1.506332 -0.022320 -2.320320  
N 4.444006 0.332945 -2.842285  
C 5.475683 -0.674463 -3.078099  
C 4.939561 -2.115826 -3.036263  
C 4.832398 -2.728357 -1.669187

C 3.690411 -3.145603 -1.025482  
C 5.930702 -3.063195 -0.793198  
C 5.368636 -3.674254 0.365751  
C 7.329799 -2.927601 -0.873860  
N 4.005255 -3.708941 0.192674  
C 6.159357 -4.132322 1.427015  
C 8.117243 -3.382280 0.177808  
C 7.536840 -3.976464 1.318787  
C -3.393399 -4.660999 5.090499  
C -2.844889 -4.617041 3.803304  
C -3.063058 -3.642803 5.992009  
C -1.981822 -3.587930 3.412204  
C -2.204425 -2.609073 5.618709  
C -1.654477 -2.573418 4.325838  
O -0.821129 -1.538056 4.036010  
C -0.229900 -7.402500 6.456100  
C 0.562548 -6.368908 7.264318  
C 0.897393 -5.130841 6.430052  
C -9.280885 -0.863905 -2.375205  
C -8.533853 -2.184471 -2.158509  
C -7.198017 -2.060843 -1.398907  
C 2.124799 -6.940596 1.592499  
C 2.139060 -5.799337 2.400296  
C 1.408880 -6.895380 0.389602  
C 1.463800 -4.634873 2.022045  
C 0.731362 -5.746636 -0.002433  
C 0.734860 -4.567187 0.796802  
O 0.095381 -3.491346 0.403950  
C -3.261388 8.245295 2.822501  
C -2.014257 8.451449 1.962704  
C -1.074498 7.241109 2.000789  
O -1.635237 6.087946 2.008888  
O 0.160953 7.445282 2.027896  
C -3.285502 5.344078 5.322337  
C -1.803409 5.163107 5.687603  
O -1.478111 4.901825 6.853849  
C -4.052588 4.029119 5.561073  
N -0.908720 5.268966 4.673120  
C 0.525376 5.051212 4.877686  
C 1.280113 4.427439 3.684361  
C 0.491499 3.315629 2.984852  
C -3.695296 5.736495 -0.782497  
C -2.566752 4.834895 -1.144508  
C -2.315307 4.039716 -2.238596  
N -1.479986 4.664132 -0.316287  
C -0.635558 3.796431 -0.921826  
N -1.105073 3.389726 -2.094147  
O -0.529641 1.764182 -4.456355  
O 0.533266 -1.405173 1.615147  
H 3.116206 -0.026831 -5.439727  
H 1.791506 0.921739 -6.124860  
H 1.178400 -3.572493 -3.506822  
H 0.040546 -2.601080 -2.570112  
H 0.526441 -5.772591 -4.416787  
H -2.244903 -3.453296 -2.097586  
H -0.954687 -7.746503 -4.221909  
H -3.738123 -5.418196 -1.911236  
H -3.101554 -7.576338 -2.973898  
H -0.102916 -3.091974 -5.595408  
H -4.251256 -4.375989 -7.345165  
H -4.428510 -4.464499 -5.585034  
H -4.595428 -1.937317 -7.312624  
H -5.793791 -2.493048 -6.135037

H -3.863496 -0.651872 -5.399148  
H -4.359820 -1.908714 -4.262023  
H -2.043050 -4.362710 -5.733358  
H 1.833951 1.995655 -3.773849  
H 1.550953 3.147967 -2.489885  
H 3.869089 3.140201 -1.766639  
H 5.626814 -2.719599 -3.643546  
H 3.971148 -2.163062 -3.549235  
H 2.659029 -3.095412 -1.344895  
H 7.793142 -2.476488 -1.747121  
H 9.197403 -3.279539 0.123608  
H 5.709556 -4.595258 2.300234  
H 8.177520 -4.320115 2.125910  
H 6.278007 -0.545602 -2.344084  
H -3.086734 -5.396161 3.085106  
H -3.476846 -3.649450 6.996977  
H -1.559431 -3.569782 2.410042  
H -1.948165 -1.816778 6.315376  
H -0.452076 -1.563125 3.121964  
H -0.015445 -6.067867 8.146828  
H 1.493068 -5.409666 5.554164  
H -0.018134 -4.646073 6.076525  
H 0.339263 -7.743916 5.584544  
H -8.335134 -2.643184 -3.136472  
H -6.573709 -1.335651 -1.943093  
H -9.590482 -0.408208 -1.429511  
H 1.383111 -7.771967 -0.255197  
H 2.689022 -5.809538 3.339692  
H 0.182290 -5.719968 -0.938123  
H 1.477562 -3.756041 2.660973  
H 0.353940 -2.330857 1.089322  
H -2.308388 8.610161 0.915480  
H -1.453930 9.339536 2.270796  
H -3.807919 7.359241 2.494261  
H -3.914138 3.693235 6.592120  
H -5.123643 4.161672 5.379111  
H -3.686404 6.132398 5.968798  
H 1.126093 2.855408 2.223248  
H 0.177323 2.537835 3.689707  
H -0.399279 3.718973 2.496522  
H 0.614237 4.397162 5.749947  
H -4.480052 5.682592 -1.541634  
H -4.135723 5.464259 0.182435  
H -2.932094 3.897324 -3.115603  
H 0.294294 3.481867 -0.474095  
H -0.654640 2.289932 -3.637250  
H -3.932969 9.109536 2.763620  
H -10.183936 -1.018110 -2.975446  
H 2.861358 -0.014424 -7.207546  
H 5.924702 -0.480029 -4.059613  
H 3.771711 3.477056 -3.481144  
H 2.656056 -7.839161 1.891804  
H -0.467844 -8.280008 7.066201  
H 1.028715 5.994460 5.130711  
H -4.064144 -5.463793 5.379867  
H -1.371122 5.132715 0.603730  
H -0.915418 0.897481 -4.240500  
H -1.172135 -6.978817 6.092094  
H -1.237019 5.508258 3.733326  
H 0.963040 -0.720017 -4.192271  
H 3.488506 0.016478 -2.737626  
H 3.325815 -4.100159 0.838641  
C 0.652155 0.478071 0.185369

C 1.466093 -0.626575 0.902402  
H -0.079370 -0.005014 -0.463126  
H 0.143828 1.096179 0.925451  
C 4.559080 0.995989 3.418336  
C 3.358238 0.588060 3.999703  
C 4.786944 0.880104 2.046695  
C 2.363678 0.057699 3.183584  
H 3.218461 0.686251 5.068598  
C 3.781886 0.347169 1.247428  
H 5.735277 1.192976 1.629423  
C 2.557174 -0.062091 1.799867  
H 1.432084 -0.278211 3.621863  
H 3.961675 0.233308 0.183315  
H 1.951353 -1.235162 0.128437  
H -3.373518 6.781455 -0.705764  
H -2.994582 8.104137 3.874681  
H -3.394678 5.668169 4.284310  
H -8.652363 -0.137029 -2.902857  
H -2.081752 -3.303537 -7.159110  
H 2.178828 3.973249 4.125352  
H -3.691001 3.239932 4.894083  
O 1.777352 5.382587 2.761941  
H 1.070185 6.011451 2.475206  
H -9.183690 -2.889589 -1.619801  
C -6.455157 -3.405068 -1.391623  
H -6.271472 -3.766313 -2.409773  
H -5.487735 -3.320730 -0.884842  
H -7.038835 -4.171556 -0.866435  
C -7.382176 -1.540093 0.034392  
H -7.840413 -0.546754 0.056486  
H -8.021830 -2.216999 0.614996  
H -6.419268 -1.469503 0.551147  
N 5.611931 1.546532 4.270224  
O 5.397592 1.631448 5.483048  
O 6.668410 1.900565 3.738758  
H 1.489928 -6.821180 7.636914  
C 2.148910 -2.631166 6.148466  
H 2.676697 -1.809501 6.637049  
H 2.772728 -3.022513 5.340961  
H 1.206870 -2.260154 5.737943  
S 1.854065 -3.911085 7.421533

**TS2-R-C2-r3**

C 2.607899 -0.182387 -6.113601  
C 1.610748 -1.338838 -6.012204  
O 1.251836 -1.959382 -7.019637  
N 1.157317 -1.628641 -4.761925  
C 0.214333 -2.717309 -4.527702  
C -1.232779 -2.197168 -4.505139  
O -1.526013 -1.189353 -3.835771  
C 0.545243 -3.454227 -3.204336  
C -0.243133 -4.734491 -3.025996  
C 0.228922 -5.942373 -3.560717  
C -1.470608 -4.738518 -2.349163  
C -0.508080 -7.121773 -3.432327  
C -2.213663 -5.913655 -2.224398  
C -1.736276 -7.109095 -2.767135  
N -2.175945 -2.871103 -5.202300  
C -2.027048 -4.110882 -6.015859  
C -3.478414 -4.539892 -6.267383  
C -4.249324 -3.211286 -6.291723  
C -3.571383 -2.393208 -5.187510  
C 3.498003 2.834901 -2.768898

|   |           |           |           |   |           |           |           |
|---|-----------|-----------|-----------|---|-----------|-----------|-----------|
| C | 4.714787  | 1.900557  | -2.904227 | H | 1.185957  | -5.958369 | -4.076869 |
| O | 5.829669  | 2.380033  | -3.148855 | H | -1.833300 | -3.818064 | -1.902968 |
| C | 2.075262  | 2.297617  | -3.080310 | H | -0.121745 | -8.048283 | -3.847887 |
| C | 1.465309  | 1.092884  | -2.305299 | H | -3.160896 | -5.897620 | -1.692701 |
| O | 1.228194  | 1.467067  | -0.968383 | H | -2.311306 | -8.024820 | -2.663286 |
| O | 1.885921  | -0.098345 | -2.501952 | H | 0.341751  | -3.408065 | -5.363210 |
| N | 4.523862  | 0.574275  | -2.691563 | H | -3.579159 | -5.118855 | -7.188842 |
| C | 5.625300  | -0.376599 | -2.805599 | H | -3.826344 | -5.161945 | -5.435581 |
| C | 5.162873  | -1.846952 | -2.878015 | H | -4.118256 | -2.716060 | -7.260403 |
| C | 5.052962  | -2.552794 | -1.556127 | H | -5.321439 | -3.332063 | -6.117544 |
| C | 3.912116  | -3.007898 | -0.937821 | H | -3.598725 | -1.314335 | -5.355580 |
| C | 6.149791  | -2.931977 | -0.696948 | H | -4.019527 | -2.586535 | -4.204417 |
| C | 5.587763  | -3.608037 | 0.425785  | H | -1.456394 | -4.867466 | -5.477138 |
| C | 7.547950  | -2.783331 | -0.765276 | H | 2.024329  | 2.008856  | -4.132769 |
| N | 4.225394  | -3.642468 | 0.245669  | H | 1.387822  | 3.138899  | -2.957175 |
| C | 6.378135  | -4.118609 | 1.462881  | H | 3.525854  | 3.229683  | -1.744840 |
| C | 8.335393  | -3.289421 | 0.262962  | H | 5.894790  | -2.379154 | -3.499755 |
| C | 7.755210  | -3.948581 | 1.367934  | H | 4.211546  | -1.905550 | -3.418340 |
| C | -3.223504 | -4.541399 | 5.295799  | H | 2.882494  | -2.933174 | -1.255147 |
| C | -2.667381 | -4.612947 | 4.012336  | H | 8.009393  | -2.279730 | -1.610649 |
| C | -2.990385 | -3.391488 | 6.058737  | H | 9.415086  | -3.176485 | 0.218539  |
| C | -1.892267 | -3.570966 | 3.490341  | H | 5.927299  | -4.631939 | 2.306939  |
| C | -2.220642 | -2.343398 | 5.554135  | H | 8.395651  | -4.331830 | 2.157370  |
| C | -1.662300 | -2.423829 | 4.266415  | H | 6.320886  | -0.246660 | -1.967032 |
| O | -0.920929 | -1.361441 | 3.850533  | H | -2.834742 | -5.494825 | 3.399365  |
| C | 0.093305  | -6.909003 | 6.964103  | H | -3.411528 | -3.304666 | 7.056890  |
| C | 0.561366  | -5.716932 | 7.806353  | H | -1.462906 | -3.642603 | 2.493375  |
| C | 0.920578  | -4.510173 | 6.936584  | H | -2.043049 | -1.448583 | 6.142841  |
| C | -9.082890 | -1.762120 | -2.626141 | H | -0.558046 | -1.448046 | 2.938942  |
| C | -8.372498 | -3.097552 | -2.379441 | H | -0.227734 | -5.432644 | 8.513294  |
| C | -7.038944 | -2.994646 | -1.612827 | H | 1.723596  | -4.767516 | 6.237106  |
| C | 2.604199  | -6.576499 | 2.168500  | H | 0.053010  | -4.183876 | 6.354471  |
| C | 2.476648  | -5.329994 | 2.790546  | H | 0.872439  | -7.230107 | 6.264196  |
| C | 1.904762  | -6.798154 | 0.974888  | H | -8.179545 | -3.579968 | -3.347100 |
| C | 1.683360  | -4.322520 | 2.235899  | H | -6.391622 | -2.297628 | -2.167090 |
| C | 1.106460  | -5.809040 | 0.411235  | H | -9.386907 | -1.281040 | -1.691295 |
| C | 0.964303  | -4.524514 | 1.017524  | H | 1.988447  | -7.761076 | 0.473825  |
| O | 0.213093  | -3.600617 | 0.475346  | H | 3.006882  | -5.133041 | 3.720918  |
| C | -4.050399 | 8.149299  | 2.134600  | H | 0.571333  | -5.992824 | -0.515329 |
| C | -2.597741 | 8.414311  | 1.744189  | H | 1.594606  | -3.358556 | 2.728477  |
| C | -1.750948 | 7.138931  | 1.702360  | H | 0.356101  | -2.279957 | 0.990599  |
| O | -2.401880 | 6.038923  | 1.632748  | H | -2.546073 | 8.872720  | 0.746554  |
| O | -0.500135 | 7.241371  | 1.739300  | H | -2.117771 | 9.125946  | 2.425016  |
| C | -3.942409 | 5.430214  | 4.829205  | H | -4.508110 | 7.427825  | 1.455799  |
| C | -2.479456 | 5.418496  | 5.303712  | H | -4.645474 | 4.246057  | 6.510575  |
| O | -2.204164 | 5.472111  | 6.509280  | H | -5.793223 | 4.320111  | 5.157691  |
| C | -4.733199 | 4.250990  | 5.420695  | H | -4.377564 | 6.373289  | 5.180676  |
| N | -1.547547 | 5.340556  | 4.322941  | H | 0.941716  | 2.365168  | 3.251692  |
| C | -0.104993 | 5.430499  | 4.544599  | H | 0.752212  | 2.766316  | 4.967903  |
| C | 0.675599  | 4.474000  | 3.627626  | H | -0.658881 | 2.788306  | 3.887262  |
| C | 0.410656  | 3.008853  | 3.956153  | H | 0.092348  | 5.199811  | 5.594203  |
| C | -4.126597 | 5.377496  | -1.298901 | H | -4.840503 | 5.147453  | -2.093525 |
| C | -2.978951 | 4.430266  | -1.348225 | H | -4.649553 | 5.323048  | -0.338967 |
| C | -2.626448 | 3.463246  | -2.255763 | H | -3.135890 | 3.155028  | -3.156781 |
| N | -1.987359 | 4.420338  | -0.389201 | H | -0.190510 | 3.283695  | -0.157613 |
| C | -1.084425 | 3.485904  | -0.725009 | H | -0.762146 | 1.920240  | -2.473807 |
| N | -1.442754 | 2.880867  | -1.854844 | H | -4.639144 | 9.074149  | 2.107212  |
| O | -0.082862 | 1.168941  | -3.027935 | H | -9.985423 | -1.903682 | -3.230233 |
| O | 0.425986  | -1.301479 | 1.381109  | H | 3.405292  | -0.474463 | -6.800641 |
| H | 3.034153  | 0.098034  | -5.149682 | H | 6.193316  | -0.123857 | -3.709031 |
| H | 2.100134  | 0.686666  | -6.544604 | H | 3.695757  | 3.681443  | -3.430848 |
| H | 1.615964  | -3.680612 | -3.227986 | H | 3.227194  | -7.353149 | 2.602226  |
| H | 0.368867  | -2.783912 | -2.358441 | H | -0.159731 | -7.763714 | 7.599915  |

H 0.228761 6.459415 4.354385  
H -3.824739 -5.356510 5.685751  
H -1.990036 5.016368 0.480169  
H -0.456771 0.267379 -3.137984  
H -0.794650 -6.650409 6.377228  
H -1.857402 5.367662 3.350467  
H 1.437363 -1.038561 -3.965839  
H 3.568699 0.208213 -2.575155  
H 3.543372 -4.016076 0.898579  
C 0.526961 0.518383 -0.141285  
C 1.355817 -0.544700 0.628532  
H -0.206971 -0.025088 -0.741946  
H -0.012818 1.116232 0.598441  
C 4.502417 1.081788 3.082922  
C 3.401112 0.487282 3.697848  
C 4.605407 1.167046 1.692732  
C 2.382921 -0.028178 2.900846  
H 3.353097 0.435128 4.777979  
C 3.580746 0.645386 0.913029  
H 5.477952 1.624617 1.244353  
C 2.453305 0.044989 1.501841  
H 1.523893 -0.498369 3.362363  
H 3.664650 0.691483 -0.165618  
H 1.841152 -1.181472 -0.119761  
H -3.798677 6.415052 -1.429314  
H -4.118325 7.741575 3.145645  
H -3.994241 5.427907 3.737420  
H -8.431643 -1.061897 -3.162250  
H -1.505479 -3.876572 -6.951719  
H 1.745180 4.686272 3.806708  
H -4.353219 3.295320 5.045033  
O 0.362235 4.668424 2.252802  
H 0.168197 5.620917 2.069029  
H -9.044163 -3.774951 -1.832021  
H 1.431634 -6.006657 8.408281  
C 1.813848 -1.858378 6.677341  
H 0.918132 -1.662497 6.083375  
H 2.117070 -0.939309 7.183247  
H 2.624538 -2.188610 6.023082  
S 1.479070 -3.099612 7.977863  
N 5.576583 1.619447 3.911994  
O 5.473998 1.524251 5.139755  
O 6.542421 2.146986 3.350908  
C -6.333416 -4.358154 -1.573588  
H -6.153454 -4.745108 -2.582848  
H -5.367227 -4.290067 -1.061954  
H -6.941174 -5.097493 -1.036970  
C -7.218102 -2.440197 -0.191604  
H -7.649087 -1.434513 -0.192401  
H -7.879801 -3.087640 0.397821  
H -6.257073 -2.385290 0.330504

**Int2-R-C2-r3**

C 2.750200 -0.174703 -6.042501  
C 1.746730 -1.329420 -5.952502  
O 1.368694 -1.923795 -6.970245  
N 1.319063 -1.650815 -4.702724  
C 0.371800 -2.740110 -4.483212  
C -1.076635 -2.229245 -4.525515  
O -1.392284 -1.202590 -3.896620  
C 0.655925 -3.433445 -3.125454  
C -0.144654 -4.701560 -2.918724  
C 0.331354 -5.930226 -3.399934

C -1.383812 -4.676764 -2.263755  
C -0.413752 -7.100919 -3.244025  
C -2.134999 -5.843545 -2.111061  
C -1.653861 -7.059666 -2.602284  
N -1.996217 -2.931099 -5.226476  
C -1.812700 -4.187687 -6.004286  
C -3.252057 -4.634395 -6.291822  
C -4.032306 -3.313248 -6.370726  
C -3.393964 -2.462796 -5.267120  
C 3.516093 2.886783 -2.707208  
C 4.761154 1.982016 -2.797545  
O 5.874893 2.494722 -2.985620  
C 2.129900 2.329031 -3.122818  
C 1.443521 1.102418 -2.421160  
O 1.216708 1.504834 -1.025574  
O 2.012160 -0.080568 -2.527004  
N 4.582601 0.651636 -2.612436  
C 5.702400 -0.284894 -2.672397  
C 5.277000 -1.720237 -3.062457  
C 5.078590 -2.658247 -1.905009  
C 3.917968 -2.891533 -1.205011  
C 6.090228 -3.478828 -1.285636  
C 5.461500 -4.186173 -0.218541  
C 7.459849 -3.696333 -1.526255  
N 4.139253 -3.809353 -0.198806  
C 6.159492 -5.089924 0.592336  
C 8.156684 -4.589807 -0.720648  
C 7.511923 -5.279805 0.328974  
C -3.232098 -4.544796 5.284196  
C -2.649530 -4.604598 4.011991  
C -3.039290 -3.389999 6.051113  
C -1.889449 -3.545284 3.503403  
C -2.285107 -2.324137 5.560206  
C -1.703843 -2.392220 4.282312  
O -0.984576 -1.310544 3.875005  
C 0.092900 -6.836200 7.040300  
C 0.811722 -5.659654 7.709765  
C 1.042944 -4.502957 6.734881  
C -8.978593 -1.941703 -2.779105  
C -8.463788 -3.330823 -2.385979  
C -7.146699 -3.335602 -1.584793  
C 2.694801 -6.497599 2.293899  
C 2.723003 -5.187108 2.785156  
C 1.817523 -6.789075 1.238936  
C 1.907848 -4.190399 2.241556  
C 0.996487 -5.811102 0.688637  
C 1.005184 -4.463820 1.167217  
O 0.226610 -3.555962 0.642595  
C -4.227527 8.101195 1.995232  
C -2.721765 8.386372 1.890519  
C -2.095036 7.389869 0.918536  
O -1.906980 6.193570 1.408967  
O -1.886789 7.704826 -0.259646  
C -4.124662 5.407610 4.715151  
C -2.661922 5.394133 5.192874  
O -2.390666 5.170722 6.378590  
C -4.894248 4.251926 5.377923  
N -1.716628 5.620379 4.246541  
C -0.282946 5.476574 4.508423  
C 0.427656 4.595986 3.463243  
C -0.260469 3.243946 3.262565  
C -4.182318 5.299607 -1.414716  
C -2.991919 4.408439 -1.482858

|   |           |           |           |   |           |           |           |
|---|-----------|-----------|-----------|---|-----------|-----------|-----------|
| C | -2.661821 | 3.398968  | -2.347837 | H | -3.195845 | 2.996978  | -3.193577 |
| N | -1.944192 | 4.509450  | -0.586679 | H | -0.077056 | 3.446810  | -0.394066 |
| C | -1.017642 | 3.603266  | -0.897537 | H | -0.872092 | 2.140083  | -2.421403 |
| N | -1.431438 | 2.913298  | -1.962056 | H | -4.713711 | 8.779759  | 2.704008  |
| O | 0.115854  | 1.092608  | -3.068676 | H | -9.878013 | -2.017765 | -3.399398 |
| O | 0.404978  | -1.181996 | 1.411401  | H | 3.589019  | -0.495052 | -6.665920 |
| H | 3.115262  | 0.147624  | -5.067542 | H | 6.414685  | 0.111402  | -3.404289 |
| H | 2.269941  | 0.670486  | -6.545760 | H | 3.738955  | 3.761116  | -3.324188 |
| H | 1.725322  | -3.663962 | -3.104539 | H | 3.331380  | -7.266880 | 2.720756  |
| H | 0.459612  | -2.727465 | -2.313527 | H | -0.072883 | -7.651580 | 7.752029  |
| H | 1.298279  | -5.969168 | -3.896070 | H | 0.206869  | 6.458828  | 4.522561  |
| H | -1.751453 | -3.739333 | -1.858333 | H | -3.821959 | -5.373190 | 5.663545  |
| H | -0.024091 | -8.043305 | -3.618854 | H | -1.882943 | 5.214616  | 0.226123  |
| H | -3.091872 | -5.804571 | -1.597910 | H | -0.182096 | 0.169736  | -3.209264 |
| H | -2.235522 | -7.968562 | -2.477182 | H | -0.881580 | -6.529083 | 6.645365  |
| H | 0.532019  | -3.455309 | -5.292652 | H | -1.995979 | 5.824718  | 3.283651  |
| H | -3.319167 | -5.234313 | -7.202920 | H | 1.599922  | -1.059407 | -3.894647 |
| H | -3.621749 | -5.241226 | -5.458136 | H | 3.611739  | 0.278221  | -2.521241 |
| H | -3.876415 | -2.840100 | -7.346768 | H | 3.449497  | -4.097355 | 0.488114  |
| H | -5.108216 | -3.439088 | -6.225690 | C | 0.495999  | 0.566667  | -0.224369 |
| H | -3.423043 | -1.388683 | -5.463653 | C | 1.325403  | -0.418874 | 0.649030  |
| H | -3.871821 | -2.634051 | -4.293834 | H | -0.169224 | -0.042742 | -0.844783 |
| H | -1.254134 | -4.927163 | -5.430001 | H | -0.132529 | 1.148469  | 0.460961  |
| H | 2.160461  | 2.054944  | -4.181613 | C | 4.223237  | 1.598064  | 3.115009  |
| H | 1.425231  | 3.164588  | -3.051504 | C | 3.086381  | 1.054337  | 3.713364  |
| H | 3.469907  | 3.242696  | -1.669449 | C | 4.445024  | 1.496691  | 1.739456  |
| H | 6.055251  | -2.133454 | -3.714995 | C | 2.154686  | 0.399006  | 2.913478  |
| H | 4.368214  | -1.670966 | -3.671214 | H | 2.946802  | 1.146072  | 4.782903  |
| H | 2.940304  | -2.458195 | -1.355197 | C | 3.502915  | 0.841821  | 0.955933  |
| H | 7.968341  | -3.170849 | -2.330629 | H | 5.342477  | 1.919783  | 1.306458  |
| H | 9.214713  | -4.761966 | -0.898638 | C | 2.343085  | 0.288189  | 1.527720  |
| H | 5.653946  | -5.623553 | 1.391628  | H | 1.274299  | -0.041363 | 3.364116  |
| H | 8.082219  | -5.972984 | 0.941170  | H | 3.669889  | 0.751286  | -0.110828 |
| H | 6.234682  | -0.310157 | -1.711752 | H | 1.877303  | -1.071502 | -0.036023 |
| H | -2.783284 | -5.491329 | 3.397743  | H | -3.869100 | 6.347864  | -1.390422 |
| H | -3.480289 | -3.313489 | 7.041557  | H | -4.410064 | 7.077353  | 2.326882  |
| H | -1.436809 | -3.607429 | 2.515476  | H | -4.174555 | 5.336330  | 3.624907  |
| H | -2.137622 | -1.425577 | 6.151600  | H | -8.225493 | -1.389698 | -3.353589 |
| H | -0.597901 | -1.396848 | 2.974586  | H | -1.262670 | -3.971531 | -6.928243 |
| H | 0.221629  | -5.303684 | 8.563335  | H | 1.440010  | 4.419647  | 3.849579  |
| H | 1.647064  | -4.832862 | 5.882685  | H | -4.501133 | 3.283638  | 5.052530  |
| H | 0.089338  | -4.128192 | 6.349014  | O | 0.620476  | 5.276097  | 2.223435  |
| H | 0.679416  | -7.233640 | 6.204824  | H | -0.244097 | 5.610437  | 1.908166  |
| H | -8.316889 | -3.925490 | -3.297562 | H | -9.234454 | -3.856023 | -1.803010 |
| H | -6.396463 | -2.790309 | -2.177957 | C | -6.637924 | -4.771811 | -1.393114 |
| H | -9.235091 | -1.337204 | -1.903544 | H | -5.681801 | -4.786019 | -0.858620 |
| H | 1.777307  | -7.800609 | 0.838146  | H | -7.352264 | -5.365133 | -0.808608 |
| H | 3.396019  | -4.930981 | 3.601727  | H | -6.493715 | -5.277314 | -2.354483 |
| H | 0.323463  | -6.050964 | -0.129549 | C | -7.279680 | -2.626771 | -0.228655 |
| H | 1.937185  | -3.178480 | 2.636521  | H | -7.565554 | -1.576234 | -0.337863 |
| H | 0.380775  | -2.170581 | 1.072892  | H | -8.039089 | -3.117565 | 0.393329  |
| H | -2.551474 | 9.402367  | 1.522934  | H | -6.332846 | -2.654171 | 0.320889  |
| H | -2.255306 | 8.288134  | 2.876466  | H | 1.774775  | -5.995651 | 8.113710  |
| H | -4.712431 | 8.231236  | 1.021704  | C | 2.072539  | -1.950341 | 6.167137  |
| H | -4.791522 | 4.310000  | 6.463240  | H | 2.539525  | -1.043259 | 6.556453  |
| H | -5.957081 | 4.290629  | 5.119996  | H | 2.708555  | -2.368344 | 5.383210  |
| H | -4.568291 | 6.368308  | 5.003452  | H | 1.093558  | -1.701360 | 5.751048  |
| H | 0.323243  | 2.630184  | 2.573267  | S | 1.915057  | -3.113475 | 7.569195  |
| H | -0.354870 | 2.700318  | 4.209077  | N | 5.208765  | 2.279255  | 3.947884  |
| H | -1.264366 | 3.374028  | 2.846844  | O | 4.996989  | 2.357486  | 5.163031  |
| H | -0.187445 | 5.038495  | 5.504566  | O | 6.213283  | 2.749065  | 3.403418  |
| H | -4.825489 | 5.139877  | -2.282690 |   |           |           |           |
| H | -4.774243 | 5.108781  | -0.512623 |   |           |           |           |

TS3-R-C2-r3

|   |           |           |           |   |           |           |           |
|---|-----------|-----------|-----------|---|-----------|-----------|-----------|
| C | 2.918595  | -0.457396 | -5.977101 | C | -3.975357 | 5.563941  | 4.528491  |
| C | 1.901368  | -1.598640 | -5.891180 | C | -2.531485 | 5.288005  | 4.989416  |
| O | 1.557136  | -2.223878 | -6.900921 | O | -2.303512 | 4.739818  | 6.073784  |
| N | 1.414145  | -1.869717 | -4.649643 | C | -4.976513 | 4.641471  | 5.234300  |
| C | 0.410583  | -2.904305 | -4.430495 | N | -1.552721 | 5.697275  | 4.142367  |
| C | -1.007417 | -2.320115 | -4.541202 | C | -0.130199 | 5.485004  | 4.408190  |
| O | -1.286337 | -1.244843 | -3.979007 | C | 0.613892  | 4.744219  | 3.285254  |
| C | 0.623012  | -3.587933 | -3.056783 | C | -0.103322 | 3.460311  | 2.863828  |
| C | -0.210595 | -4.839881 | -2.882769 | C | -3.901721 | 5.352723  | -1.598403 |
| C | 0.235901  | -6.069469 | -3.390665 | C | -2.551554 | 4.746073  | -1.345316 |
| C | -1.453377 | -4.798582 | -2.236486 | C | -1.927201 | 3.635980  | -1.863858 |
| C | -0.540260 | -7.224005 | -3.266403 | N | -1.648244 | 5.283562  | -0.441859 |
| C | -2.234703 | -5.948897 | -2.114028 | C | -0.544760 | 4.522454  | -0.421472 |
| C | -1.782391 | -7.165563 | -2.630426 | N | -0.679442 | 3.514792  | -1.276787 |
| N | -1.941034 | -3.008667 | -5.237536 | O | 0.269827  | 1.116309  | -3.391634 |
| C | -1.793202 | -4.294568 | -5.976864 | O | 0.071917  | -1.238430 | 1.101214  |
| C | -3.241400 | -4.672354 | -6.313207 | H | 3.302616  | -0.158363 | -5.001166 |
| C | -3.944117 | -3.314261 | -6.462560 | H | 2.439791  | 0.405047  | -6.451875 |
| C | -3.307449 | -2.465529 | -5.356513 | H | 1.686005  | -3.842616 | -2.992521 |
| C | 3.726292  | 2.630195  | -2.675820 | H | 0.412074  | -2.884426 | -2.248056 |
| C | 4.914211  | 1.655032  | -2.783644 | H | 1.204044  | -6.122295 | -3.883398 |
| O | 6.034494  | 2.088312  | -3.086646 | H | -1.798767 | -3.861034 | -1.812006 |
| C | 2.323031  | 2.266370  | -3.230819 | H | -0.172863 | -8.167111 | -3.661387 |
| C | 1.484628  | 1.062734  | -2.731634 | H | -3.193389 | -5.896982 | -1.605398 |
| O | 0.978925  | 1.629201  | -1.074375 | H | -2.387596 | -8.061870 | -2.528706 |
| O | 2.008270  | -0.086595 | -2.565982 | H | 0.560942  | -3.641049 | -5.222349 |
| N | 4.702603  | 0.356823  | -2.455704 | H | -3.302941 | -5.294812 | -7.209498 |
| C | 5.789203  | -0.620402 | -2.539291 | H | -3.678171 | -5.233736 | -5.480093 |
| C | 5.323693  | -2.064998 | -2.293842 | H | -3.721171 | -2.880331 | -7.443735 |
| C | 5.147244  | -2.461393 | -0.855362 | H | -5.030475 | -3.377805 | -6.361498 |
| C | 3.985992  | -2.865799 | -0.239067 | H | -3.265907 | -1.398531 | -5.586143 |
| C | 6.187394  | -2.568317 | 0.141553  | H | -3.836552 | -2.578328 | -4.401480 |
| C | 5.571975  | -3.037904 | 1.339926  | H | -1.297526 | -5.046219 | -5.362805 |
| C | 7.576255  | -2.337970 | 0.143356  | H | 2.411725  | 2.080327  | -4.308202 |
| N | 4.233024  | -3.201583 | 1.075907  | H | 1.698117  | 3.159721  | -3.138900 |
| C | 6.300651  | -3.268349 | 2.513273  | H | 3.627954  | 2.887086  | -1.612611 |
| C | 8.302540  | -2.567122 | 1.306925  | H | 6.080310  | -2.717044 | -2.751651 |
| C | 7.669989  | -3.026225 | 2.481674  | H | 4.395796  | -2.246632 | -2.849175 |
| C | -3.474363 | -4.403557 | 5.280689  | H | 2.981067  | -2.953287 | -0.628314 |
| C | -2.773353 | -4.617398 | 4.086840  | H | 8.079890  | -1.988652 | -0.753939 |
| C | -3.531946 | -3.101683 | 5.792489  | H | 9.374506  | -2.390115 | 1.314701  |
| C | -2.140829 | -3.567380 | 3.411037  | H | 5.811779  | -3.626902 | 3.414461  |
| C | -2.906573 | -2.044561 | 5.131160  | H | 8.262369  | -3.194472 | 3.376674  |
| C | -2.202683 | -2.266024 | 3.933740  | H | 6.575737  | -0.348659 | -1.826119 |
| O | -1.627662 | -1.181377 | 3.350577  | H | -2.713294 | -5.617873 | 3.666540  |
| C | -0.278633 | -6.787880 | 7.149194  | H | -4.070520 | -2.902456 | 6.715193  |
| C | 0.014206  | -5.607030 | 8.081598  | H | -1.599235 | -3.750387 | 2.486683  |
| C | 0.198814  | -4.300452 | 7.306650  | H | -2.955969 | -1.033346 | 5.523577  |
| C | -8.938191 | -1.725513 | -2.952917 | H | -1.111247 | -1.371049 | 2.532876  |
| C | -8.416697 | -3.113391 | -2.564220 | H | -0.808528 | -5.490913 | 8.797998  |
| C | -7.097490 | -3.114541 | -1.766505 | H | 1.045198  | -4.380652 | 6.615567  |
| C | 2.438624  | -6.629101 | 2.458333  | H | -0.697849 | -4.072675 | 6.721513  |
| C | 2.124004  | -5.416951 | 3.082513  | H | 0.540924  | -6.947124 | 6.439848  |
| C | 2.082238  | -6.792644 | 1.112877  | H | -8.269788 | -3.705462 | -3.477500 |
| C | 1.481420  | -4.386984 | 2.388756  | H | -6.350964 | -2.565176 | -2.360617 |
| C | 1.442328  | -5.780987 | 0.407641  | H | -9.195009 | -1.124124 | -2.075318 |
| C | 1.113954  | -4.528409 | 1.013564  | H | 2.314040  | -7.727803 | 0.605308  |
| O | 0.525401  | -3.587303 | 0.329920  | H | 2.384253  | -5.265550 | 4.129135  |
| C | -3.915718 | 8.212488  | 1.763094  | H | 1.171464  | -5.921237 | -0.634315 |
| C | -2.633034 | 8.950907  | 2.147756  | H | 1.234127  | -3.454470 | 2.890746  |
| C | -1.355738 | 8.293288  | 1.605481  | H | 0.288394  | -2.216616 | 0.836121  |
| O | -1.373948 | 6.988836  | 1.611167  | H | -2.655439 | 9.993574  | 1.816152  |
| O | -0.404426 | 8.991359  | 1.242820  | H | -2.537230 | 8.971600  | 3.242951  |

H -4.068068 8.229064 0.677543  
H -4.878241 4.730552 6.318104  
H -6.002593 4.895486 4.950944  
H -4.205156 6.614423 4.749063  
H 0.486272 2.926049 2.115669  
H -0.246597 2.794921 3.721599  
H -1.087621 3.682306 2.441124  
H -0.070244 4.908758 5.334166  
H -4.451129 4.749002 -2.323616  
H -4.492043 5.403397 -0.677556  
H -2.272805 2.928892 -2.601365  
H 0.295890 4.703680 0.235474  
H 0.096215 2.632107 -1.288420  
H -4.795480 8.674050 2.225211  
H -9.838816 -1.803872 -3.571182  
H 3.742324 -0.775298 -6.620363  
H 6.246617 -0.551893 -3.535117  
H 4.055919 3.537801 -3.186011  
H 2.942175 -7.421697 3.003955  
H -0.413796 -7.713304 7.718408  
H 0.369948 6.447703 4.576947  
H -3.963995 -5.226272 5.791688  
H -1.752986 6.077696 0.224987  
H -0.111975 0.212811 -3.439764  
H -1.190202 -6.612535 6.567986  
H -1.786451 6.162792 3.261696  
H 1.654990 -1.250053 -3.863590  
H 3.724659 0.041207 -2.368318  
H 3.533415 -3.590351 1.700315  
C 0.227366 0.638496 -0.385704  
C 1.021307 -0.375178 0.489184  
H -0.357541 0.029717 -1.090668  
H -0.492751 1.143811 0.274928  
C 3.682877 1.437195 3.351817  
C 2.526869 0.803550 3.808910  
C 3.993707 1.497479 1.991021  
C 1.665434 0.225465 2.881479  
H 2.319420 0.767284 4.870883  
C 3.122331 0.913894 1.079942  
H 4.906165 1.982664 1.668731  
C 1.943344 0.276292 1.507103  
H 0.768058 -0.275833 3.222273  
H 3.365217 0.932454 0.024701  
H 1.652247 -0.952688 -0.195362  
H -3.814701 6.369677 -1.995550  
H -3.872920 7.168479 2.072609  
H -4.040638 5.452263 3.441405  
H -8.188767 -1.169090 -3.527949  
H -1.196846 -4.130449 -6.882648  
H -4.798997 3.594671 4.970243  
H 1.593582 4.471218 3.700353  
O 0.903878 5.590954 2.171260  
H 0.118641 6.155423 1.963089  
H -9.183672 -3.642986 -1.980364  
C -6.582627 -4.549152 -1.578919  
H -6.439489 -5.052469 -2.541608  
H -5.624670 -4.560322 -1.047683  
H -7.292776 -5.146154 -0.993082  
C -7.229552 -2.408885 -0.408626  
H -7.519456 -1.359166 -0.514996  
H -7.985596 -2.903649 0.214305  
H -6.281252 -2.433947 0.138476  
H 0.915635 -5.813849 8.671497

C 0.671176 -1.532632 7.249623  
H -0.243471 -1.429586 6.660982  
H 0.836204 -0.616157 7.819733  
H 1.522065 -1.696090 6.583692  
S 0.514424 -2.897901 8.455743  
N 4.595556 2.037398 4.318711  
O 4.308033 1.968861 5.518996  
O 5.617548 2.589154 3.897435

**Prod-R-C2-r3**

C 2.684997 -0.270391 -6.145998  
C 1.678583 -1.419743 -6.071051  
O 1.213958 -1.941131 -7.087326  
N 1.303206 -1.826468 -4.817986  
C 0.157636 -2.721215 -4.637404  
C -1.137189 -1.950561 -4.968823  
O -1.262257 -0.765674 -4.600492  
C 0.138086 -3.237806 -3.178084  
C -0.913164 -4.296182 -2.919750  
C -0.654246 -5.643265 -3.216028  
C -2.167549 -3.957119 -2.395658  
C -1.625714 -6.623519 -3.004171  
C -3.142041 -4.934392 -2.182791  
C -2.875218 -6.270500 -2.488776  
N -2.125987 -2.583152 -5.631255  
C -2.136596 -3.968617 -6.174220  
C -3.605388 -4.177031 -6.563093  
C -4.071867 -2.770353 -6.968512  
C -3.372759 -1.860082 -5.952271  
C 3.693287 2.621420 -2.724813  
C 4.606062 1.511261 -3.261902  
O 5.054071 1.579271 -4.411897  
C 2.348346 2.675836 -3.478404  
C 1.539522 1.389017 -3.450205  
O 0.984077 1.426839 0.027281  
O 1.895061 0.357538 -2.895461  
N 4.892683 0.485729 -2.412495  
C 5.661684 -0.688627 -2.821869  
C 4.899320 -2.026738 -2.749426  
C 4.814180 -2.638663 -1.380405  
C 3.681228 -2.873127 -0.635183  
C 5.916246 -3.164239 -0.607853  
C 5.367119 -3.695308 0.595840  
C 7.305015 -3.263756 -0.817063  
N 4.007951 -3.494708 0.551864  
C 6.161562 -4.304197 1.575325  
C 8.096473 -3.867971 0.153396  
C 7.529794 -4.381674 1.339435  
C -3.446693 -4.602195 5.115399  
C -2.701892 -4.596385 3.932601  
C -3.557702 -3.418056 5.851646  
C -2.067039 -3.436784 3.485194  
C -2.926525 -2.252209 5.420811  
C -2.168450 -2.252006 4.236487  
O -1.574162 -1.093721 3.868114  
C -0.263304 -7.167199 6.751199  
C 0.014253 -6.137863 7.852415  
C 0.169432 -4.725206 7.284918  
C -9.097722 -1.356481 -2.780584  
C -8.633466 -2.091119 -1.518057  
C -7.112508 -2.062479 -1.268607  
C 2.300712 -6.846897 1.982887  
C 2.219621 -5.712018 2.794896

|   |           |           |           |   |            |           |           |
|---|-----------|-----------|-----------|---|------------|-----------|-----------|
| C | 1.636784  | -6.835139 | 0.749636  | H | -8.955097  | -3.139472 | -1.580965 |
| C | 1.506343  | -4.581301 | 2.388197  | H | -6.622318  | -2.462414 | -2.169904 |
| C | 0.920560  | -5.720507 | 0.329916  | H | -8.889935  | -0.283018 | -2.730894 |
| C | 0.835946  | -4.545216 | 1.129160  | H | 1.683124   | -7.710822 | 0.104704  |
| O | 0.173912  | -3.495355 | 0.702174  | H | 2.719646   | -5.702019 | 3.761829  |
| C | -3.627503 | 8.183700  | 2.248304  | H | 0.408391   | -5.718040 | -0.627544 |
| C | -2.306180 | 8.861410  | 2.613883  | H | 1.444468   | -3.706048 | 3.028298  |
| C | -1.076249 | 8.191443  | 1.980164  | H | 0.266250   | -2.391111 | 1.481892  |
| O | -1.132113 | 6.892782  | 1.934287  | H | -2.308534  | 9.920122  | 2.336159  |
| O | -0.127627 | 8.884168  | 1.593924  | H | -2.164259  | 8.821767  | 3.703571  |
| C | -3.674703 | 5.400808  | 4.878700  | H | -3.824091  | 8.261743  | 1.172623  |
| C | -2.220446 | 5.088725  | 5.280938  | H | -4.515304  | 4.517526  | 6.674346  |
| O | -1.968679 | 4.511772  | 6.345885  | H | -5.690624  | 4.732418  | 5.357433  |
| C | -4.656198 | 4.463296  | 5.593098  | H | -3.884108  | 6.445185  | 5.143735  |
| N | -1.261344 | 5.490725  | 4.410342  | H | 0.623073   | 2.849980  | 2.108307  |
| C | 0.160404  | 5.219900  | 4.621803  | H | -0.041619  | 2.590910  | 3.734513  |
| C | 0.854562  | 4.547821  | 3.426161  | H | -0.909821  | 3.607775  | 2.573143  |
| C | 0.084639  | 3.323894  | 2.930265  | H | 0.225417   | 4.573754  | 5.500181  |
| C | -3.810201 | 5.499298  | -1.250002 | H | -4.445713  | 4.942731  | -1.943295 |
| C | -2.495298 | 4.800265  | -1.087798 | H | -4.344719  | 5.584148  | -0.296736 |
| C | -1.975125 | 3.659148  | -1.658659 | H | -2.444159  | 3.008251  | -2.384061 |
| N | -1.499529 | 5.258160  | -0.246306 | H | 0.435954   | 4.528366  | 0.264143  |
| C | -0.455838 | 4.399837  | -0.333309 | H | 0.372873   | 1.993665  | -0.497032 |
| N | -0.699688 | 3.410712  | -1.181055 | H | -4.472709  | 8.644867  | 2.771707  |
| O | 0.406726  | 1.483122  | -4.152770 | H | -10.176521 | -1.474212 | -2.928643 |
| O | 0.327034  | -1.500752 | 2.101775  | H | 3.282646   | -0.394712 | -7.050413 |
| H | 3.340689  | -0.199844 | -5.278971 | H | 5.968003   | -0.490181 | -3.850892 |
| H | 2.127203  | 0.667415  | -6.236198 | H | 4.212322   | 3.571704  | -2.874867 |
| H | 1.132880  | -3.643184 | -2.966716 | H | 2.861687   | -7.719666 | 2.303993  |
| H | -0.014043 | -2.385623 | -2.507593 | H | -0.376009  | -8.171832 | 7.171568  |
| H | 0.319043  | -5.925471 | -3.610182 | H | 0.693550   | 6.152461  | 4.851063  |
| H | -2.378232 | -2.921169 | -2.144397 | H | -3.939905  | -5.509101 | 5.452270  |
| H | -1.404087 | -7.661621 | -3.234810 | H | -1.526169  | 6.023719  | 0.446901  |
| H | -4.105926 | -4.652122 | -1.769076 | H | -0.078963  | 0.617329  | -4.160902 |
| H | -3.630619 | -7.031862 | -2.317758 | H | -1.182182  | -6.923176 | 6.207404  |
| H | 0.283156  | -3.557402 | -5.327597 | H | -1.507250  | 5.993217  | 3.552602  |
| H | -3.715771 | -4.918302 | -7.358472 | H | 1.543283   | -1.223851 | -4.031801 |
| H | -4.169977 | -4.526398 | -5.691904 | H | 4.355534   | 0.419733  | -1.559576 |
| H | -3.726541 | -2.536372 | -7.981643 | H | 3.331216   | -3.839388 | 1.226192  |
| H | -5.158211 | -2.653875 | -6.947578 | C | 0.219582   | 0.455313  | 0.715199  |
| H | -3.137830 | -0.865228 | -6.336787 | C | 1.132167   | -0.522148 | 1.486074  |
| H | -3.969392 | -1.732230 | -5.040745 | H | -0.374162  | -0.160226 | 0.022318  |
| H | -1.794700 | -4.686331 | -5.429145 | H | -0.478616  | 0.912172  | 1.432921  |
| H | 2.518174  | 2.922680  | -4.532235 | C | 3.743173   | 1.350442  | 4.357916  |
| H | 1.714665  | 3.470480  | -3.070565 | C | 2.661241   | 0.596911  | 4.813606  |
| H | 3.508036  | 2.501469  | -1.653571 | C | 3.989795   | 1.526517  | 2.994173  |
| H | 5.428237  | -2.721905 | -3.416591 | C | 1.816993   | 0.001445  | 3.881139  |
| H | 3.897811  | -1.897545 | -3.171545 | H | 2.496781   | 0.483089  | 5.877567  |
| H | 2.645774  | -2.660989 | -0.862063 | C | 3.134453   | 0.925851  | 2.079174  |
| H | 7.756622  | -2.880182 | -1.728000 | H | 4.838496   | 2.116632  | 2.673110  |
| H | 9.168810  | -3.948380 | -0.001508 | C | 2.038041   | 0.156713  | 2.504584  |
| H | 5.719896  | -4.706681 | 2.482001  | H | 0.973753   | -0.589385 | 4.216108  |
| H | 8.173120  | -4.848509 | 2.079913  | H | 3.305214   | 1.060582  | 1.018204  |
| H | 6.571763  | -0.752541 | -2.213729 | H | 1.790087   | -0.996401 | 0.741422  |
| H | -2.610952 | -5.505691 | 3.344047  | H | -3.686261  | 6.513791  | -1.646959 |
| H | -4.138836 | -3.400223 | 6.770062  | H | -3.602892  | 7.123653  | 2.500073  |
| H | -1.500106 | -3.445295 | 2.558534  | H | -3.780997  | 5.326328  | 3.791779  |
| H | -3.007903 | -1.328181 | 5.985627  | H | -8.596118  | -1.749824 | -3.672726 |
| H | -0.924562 | -1.237486 | 3.118991  | H | -1.477310  | -4.024285 | -7.049315 |
| H | -0.804279 | -6.148211 | 8.582620  | H | 1.833365   | 4.213264  | 3.797077  |
| H | 0.996727  | -4.689481 | 6.567643  | H | -4.496717  | 3.424318  | 5.289609  |
| H | -0.743656 | -4.417413 | 6.765560  | O | 1.151982   | 5.463641  | 2.374112  |
| H | 0.553827  | -7.197641 | 6.022175  | H | 0.353580   | 6.011448  | 2.172757  |



H -9.143888 -1.670115 -0.639670  
C -6.742251 -2.974432 -0.089796  
H -5.659585 -2.992535 0.075519  
H -7.210989 -2.623408 0.837960  
H -7.074795 -4.004562 -0.260472  
C -6.581530 -0.640100 -1.036078  
H -6.768256 0.015128 -1.892378  
H -7.057532 -0.186638 -0.157523  
H -5.501030 -0.650168 -0.858075  
H 0.924275 -6.415444 8.398773  
C 0.587840 -1.973468 7.648238  
H 0.744687 -1.151484 8.349634  
H 1.421395 -2.003993 6.942110  
H -0.347314 -1.811041 7.107264  
S 0.507117 -3.514231 8.629348  
N 4.644703 1.962454 5.329066  
O 4.414475 1.793517 6.531083  
O 5.601030 2.621170 4.907350

**RC-S-SO-r1**

C 3.272792 1.105016 -5.973398  
C 2.531986 -0.229764 -5.920535  
O 2.484204 -0.962623 -6.915542  
N 1.925681 -0.550049 -4.739262  
C 1.222876 -1.821980 -4.594848  
C -0.301960 -1.616974 -4.560259  
O -0.796771 -0.759769 -3.805589  
C 1.690146 -2.586281 -3.325770  
C 1.264190 -4.039645 -3.320662  
C 2.094782 -5.023397 -3.878260  
C 0.025100 -4.435157 -2.796110  
C 1.699091 -6.361963 -3.917659  
C -0.377087 -5.771667 -2.837493  
C 0.458333 -6.740459 -3.399442  
N -1.084337 -2.396191 -5.339535  
C -0.682503 -3.499881 -6.248676  
C -2.016323 -4.177960 -6.588678  
C -3.030569 -3.025485 -6.529255  
C -2.545740 -2.192301 -5.337708  
C 3.484628 4.115328 -2.512925  
C 4.843704 3.397192 -2.538540  
O 5.891622 4.055409 -2.570290  
C 2.236981 3.305332 -2.905489  
C 1.928385 2.191058 -1.884319  
O 1.521197 2.551116 -0.757540  
O 2.184917 0.980559 -2.232863  
N 4.845419 2.038061 -2.505053  
C 6.090306 1.278106 -2.492610  
C 5.903410 -0.179000 -2.968759  
C 5.704775 -1.182094 -1.866922  
C 4.566992 -1.405554 -1.126713  
C 6.710545 -2.072552 -1.343161  
C 6.106915 -2.815630 -0.287707  
C 8.058908 -2.320831 -1.661259  
N 4.804360 -2.383589 -0.179743  
C 6.809374 -3.786965 0.436658  
C 8.759954 -3.281717 -0.942176  
C 8.139794 -4.008306 0.096939  
C -2.436080 -4.474877 4.956099  
C -2.024916 -4.359317 3.628126  
C -2.246611 -3.400467 5.830517  
C -1.425136 -3.187240 3.169500  
C -1.648866 -2.222861 5.386450

C -1.232263 -2.114201 4.052340  
O -0.633537 -0.951973 3.670946  
C 1.112498 -6.348026 6.769403  
C 1.526898 -5.048669 7.470112  
C 1.772638 -3.913309 6.473337  
C -8.201600 -2.391339 -3.243463  
C -7.634732 -3.098221 -2.007064  
C -7.021134 -2.162023 -0.947415  
C 3.807728 -5.473823 2.145118  
C 3.414923 -4.218788 2.615446  
C 3.147982 -6.022408 1.039681  
C 2.381381 -3.510505 1.992109  
C 2.118155 -5.330851 0.408005  
C 1.727752 -4.066601 0.879648  
O 0.716891 -3.440149 0.228093  
C -5.073497 8.026107 2.040497  
C -3.807924 8.360791 1.246323  
C -2.667542 7.367115 1.511841  
O -2.971669 6.124977 1.494083  
O -1.524271 7.832687 1.741755  
C -4.691099 5.272114 4.673912  
C -3.249322 5.391942 5.204484  
O -3.006737 5.288101 6.414253  
C -5.576397 4.379888 5.550991  
N -2.296886 5.653520 4.273155  
C -0.891897 5.880509 4.624302  
C 0.135452 5.295876 3.630272  
C -0.239664 3.896678 3.125839  
C -4.516455 5.388059 -1.453603  
C -3.191471 4.776085 -1.745235  
C -2.688358 4.145169 -2.857310  
N -2.169482 4.743100 -0.819199  
C -1.113517 4.107038 -1.389820  
N -1.392593 3.729040 -2.630075  
O -0.437274 2.050480 -4.767348  
O -0.106269 -0.962977 0.969469  
H 3.729459 1.373903 -5.019191  
H 2.558066 1.891555 -6.238463  
H 2.781717 -2.520561 -3.296256  
H 1.311354 -2.071784 -2.437563  
H 3.062655 -4.735933 -4.281673  
H -0.619877 -3.692651 -2.337425  
H 2.360508 -7.107799 -4.349646  
H -1.339748 -6.057192 -2.422566  
H 0.147763 -7.781024 -3.427715  
H 1.500152 -2.400392 -5.476996  
H -1.983486 -4.680288 -7.558736  
H -2.252290 -4.928134 -5.825895  
H -2.980188 -2.430548 -7.447960  
H -4.061861 -3.364796 -6.404047  
H -2.772518 -1.127070 -5.420028  
H -2.970479 -2.549394 -4.391018  
H 0.016959 -4.177302 -5.757509  
H 2.345233 2.887002 -3.907222  
H 1.381212 3.985206 -2.927119  
H 3.351462 4.498590 -1.493298  
H 6.793923 -0.464921 -3.538643  
H 5.070845 -0.216176 -3.680320  
H 3.603291 -0.917886 -1.200918  
H 8.548246 -1.766946 -2.458283  
H 9.801489 -3.478718 -1.180744  
H 6.327253 -4.348193 1.230727  
H 8.711643 -4.754520 0.641517

H 6.539613 1.284560 -1.490237  
H -2.167337 -5.186970 2.938934  
H -2.567778 -3.477809 6.865531  
H -1.097814 -3.110579 2.138390  
H -1.497490 -1.380185 6.053497  
H -0.471960 -0.966714 2.702046  
H 0.744752 -4.746744 8.177365  
H 2.570482 -4.184305 5.773460  
H 0.865877 -3.708865 5.895519  
H 1.887974 -6.689385 6.074841  
H -6.862537 -3.809510 -2.329276  
H -6.254900 -1.551282 -1.447545  
H -9.046206 -1.741590 -2.993385  
H 3.442341 -6.997546 0.661816  
H 3.916433 -3.776901 3.471728  
H 1.605491 -5.745453 -0.453498  
H 2.072708 -2.540891 2.372190  
H 0.571275 -2.523188 0.557031  
H -4.032185 8.332627 0.171170  
H -3.452416 9.370481 1.472737  
H -5.396330 7.005074 1.827011  
H -5.538500 4.713293 6.590640  
H -6.615135 4.410057 5.208269  
H -5.104061 6.288867 4.653455  
H 0.564742 3.514849 2.490019  
H -0.392222 3.196937 3.955976  
H -1.156731 3.929034 2.531028  
H -0.748463 5.430545 5.610195  
H -5.198019 5.221217 -2.292256  
H -4.970144 4.958460 -0.554201  
H -3.185214 3.962120 -3.800772  
H -0.176034 3.910586 -0.884267  
H -0.646403 2.638442 -4.008356  
H -5.892549 8.711134 1.794447  
H -8.555471 -3.117408 -3.983219  
H 4.033680 1.046276 -6.752400  
H 6.791884 1.805457 -3.146895  
H 3.601831 4.989933 -3.160204  
H 4.607993 -6.018527 2.635945  
H 0.939096 -7.147452 7.497054  
H -0.688119 6.955536 4.720455  
H -2.905671 -5.388911 5.307032  
H -2.238821 5.161342 0.120348  
H -0.455708 1.161836 -4.378040  
H 0.189540 -6.207937 6.196466  
H -2.570793 5.739348 3.289300  
H 1.968539 0.089662 -3.934357  
H 3.961736 1.526472 -2.438296  
H 4.122225 -2.734951 0.478705  
C -0.726898 -0.232329 -0.156040  
C 0.457679 0.315234 0.513470  
H 0.339547 1.122656 1.228374  
H -0.550021 -0.721635 -1.111696  
C -2.114593 0.275582 0.024091  
C -2.602528 0.721303 1.261114  
C -2.946061 0.329714 -1.103045  
C -3.898972 1.223120 1.363371  
H -1.980664 0.663137 2.148394  
C -4.240547 0.842107 -0.998352  
H -2.568068 -0.016920 -2.061417  
C -4.720324 1.289808 0.234147  
H -4.267546 1.565700 2.325692  
H -4.871345 0.894055 -1.880690

H 1.413367 0.250618 0.010341  
H -4.444810 6.469171 -1.289521  
H -4.890181 8.101676 3.117595  
H -4.678910 4.930595 3.633939  
H -7.438229 -1.770807 -3.727184  
H -0.200053 -3.088436 -7.143767  
H 1.068304 5.203036 4.207020  
H -5.240405 3.338058 5.524098  
O 0.446064 6.168365 2.557286  
H -0.359138 6.650052 2.239399  
H -8.423657 -3.701219 -1.534050  
C -6.323722 -2.972718 0.154402  
H -5.554970 -3.633735 -0.260801  
H -5.840244 -2.314746 0.884211  
H -7.044509 -3.598342 0.696054  
C -8.056665 -1.206161 -0.336308  
H -8.520023 -0.562213 -1.090151  
H -8.857374 -1.766777 0.162846  
H -7.590507 -0.555325 0.410953  
H 2.434764 -5.219632 8.061735  
S 2.258687 -2.369836 7.350428  
C 2.468329 -1.236975 5.929643  
H 1.541461 -1.138564 5.359558  
H 2.739272 -0.261454 6.338957  
H 3.273001 -1.579459 5.274015  
H -5.726727 1.689808 0.315735

**TS1-S-SO-C1-r1**

C 3.070900 0.374600 -5.893800  
C 2.331322 -0.961726 -5.845894  
O 2.216905 -1.671234 -6.851359  
N 1.795763 -1.306093 -4.638912  
C 0.975500 -2.505500 -4.485500  
C -0.519576 -2.133579 -4.590359  
O -0.959515 -1.142992 -3.981309  
C 1.277890 -3.182897 -3.126126  
C 0.542884 -4.489358 -2.916147  
C 1.066478 -5.693998 -3.411124  
C -0.680696 -4.526100 -2.232787  
C 0.384943 -6.900570 -3.235162  
C -1.364571 -5.730055 -2.053882  
C -0.835817 -6.921285 -2.556949  
N -1.340009 -2.904163 -5.336031  
C -1.009000 -4.123700 -6.105600  
C -2.385890 -4.706247 -6.451695  
C -3.279050 -3.461964 -6.574119  
C -2.767199 -2.548954 -5.453658  
C 3.437100 3.359000 -2.423500  
C 4.768954 2.597183 -2.520719  
O 5.827441 3.218795 -2.675191  
C 2.132200 2.598525 -2.732480  
C 1.779591 1.456943 -1.753389  
O 1.299266 1.779560 -0.629270  
O 2.016730 0.262560 -2.128263  
N 4.743550 1.245154 -2.390579  
C 5.967100 0.453800 -2.474200  
C 5.744120 -1.018984 -2.100184  
C 5.602996 -1.294356 -0.630864  
C 4.476474 -1.724223 0.025338  
C 6.641767 -1.200120 0.368699  
C 6.064403 -1.589865 1.612205  
C 8.003060 -0.845000 0.338719  
N 4.740896 -1.886207 1.372826

|   |           |           |           |   |           |           |           |
|---|-----------|-----------|-----------|---|-----------|-----------|-----------|
| C | 6.804245  | -1.631928 | 2.799465  | H | 3.387221  | 3.771014  | -1.406895 |
| C | 8.741647  | -0.886265 | 1.516284  | H | 6.604450  | -1.578316 | -2.491172 |
| C | 8.147554  | -1.275643 | 2.735118  | H | 4.867092  | -1.399832 | -2.637502 |
| C | -2.542900 | -5.115800 | 5.129900  | H | 3.489398  | -1.931561 | -0.362477 |
| C | -1.930850 | -4.959558 | 3.882757  | H | 8.474632  | -0.544525 | -0.592967 |
| C | -2.519520 | -4.047230 | 6.032485  | H | 9.793063  | -0.613238 | 1.500871  |
| C | -1.298483 | -3.763787 | 3.534971  | H | 6.345203  | -1.932469 | 3.736872  |
| C | -1.890554 | -2.848922 | 5.700846  | H | 8.748710  | -1.297401 | 3.639646  |
| C | -1.268661 | -2.696381 | 4.449124  | H | 6.723919  | 0.905777  | -1.824699 |
| O | -0.660126 | -1.515525 | 4.188521  | H | -1.943083 | -5.776301 | 3.165830  |
| C | 0.994000  | -7.091200 | 6.855500  | H | -2.994151 | -4.146164 | 7.005189  |
| C | 1.198069  | -5.847378 | 7.728894  | H | -0.829098 | -3.650777 | 2.562368  |
| C | 1.515059  | -4.604479 | 6.893655  | H | -1.866802 | -2.016901 | 6.397813  |
| C | -8.429000 | -2.836000 | -2.930600 | H | -0.210339 | -1.509044 | 3.292268  |
| C | -7.759801 | -4.180767 | -2.627019 | H | 0.294745  | -5.663451 | 8.323070  |
| C | -6.225143 | -4.191916 | -2.773242 | H | 2.431338  | -4.759260 | 6.313008  |
| C | 3.610000  | -6.261500 | 2.177000  | H | 0.698611  | -4.390451 | 6.196700  |
| C | 3.146420  | -5.190000 | 2.940710  | H | 1.888902  | -7.312378 | 6.263409  |
| C | 3.290634  | -6.323812 | 0.818130  | H | -8.177921 | -4.943780 | -3.297536 |
| C | 2.373347  | -4.182907 | 2.360179  | H | -5.987942 | -3.844161 | -3.790808 |
| C | 2.525304  | -5.325972 | 0.222780  | H | -8.121129 | -2.056721 | -2.226607 |
| C | 2.063217  | -4.243590 | 0.988865  | H | 3.644136  | -7.156087 | 0.215095  |
| O | 1.334116  | -3.288479 | 0.370370  | H | 3.385143  | -5.133377 | 3.999309  |
| C | -4.914100 | 7.466200  | 2.336200  | H | 2.270719  | -5.365014 | -0.830465 |
| C | -3.700723 | 7.801156  | 1.465559  | H | 1.992579  | -3.356658 | 2.953607  |
| C | -2.534702 | 6.824696  | 1.681141  | H | 1.126816  | -2.532266 | 1.003181  |
| O | -2.820650 | 5.577549  | 1.690097  | H | -3.986352 | 7.754997  | 0.405745  |
| O | -1.389626 | 7.311771  | 1.844972  | H | -3.344054 | 8.817595  | 1.657095  |
| C | -4.546800 | 4.688200  | 4.946600  | H | -5.246760 | 6.443247  | 2.147580  |
| C | -3.084545 | 4.759936  | 5.424965  | H | -5.315424 | 3.997111  | 6.852772  |
| O | -2.804412 | 4.610032  | 6.621812  | H | -6.450162 | 3.791036  | 5.499263  |
| C | -5.398100 | 3.736700  | 5.795200  | H | -4.952727 | 5.705634  | 5.018661  |
| N | -2.151121 | 5.026703  | 4.475212  | H | 0.673334  | 3.186992  | 2.318492  |
| C | -0.735000 | 5.197400  | 4.816800  | H | -0.278295 | 2.659648  | 3.727941  |
| C | 0.279214  | 4.768514  | 3.733760  | H | -1.039870 | 3.617015  | 2.442320  |
| C | -0.119142 | 3.476720  | 3.014227  | H | -0.569613 | 4.610703  | 5.724852  |
| C | -4.502900 | 4.834200  | -1.182500 | H | -5.237281 | 4.653218  | -1.972284 |
| C | -3.180835 | 4.279599  | -1.576386 | H | -4.872906 | 4.375107  | -0.259979 |
| C | -2.717111 | 3.700842  | -2.733445 | H | -3.256884 | 3.533743  | -3.656046 |
| N | -2.112844 | 4.250681  | -0.705459 | H | -0.123738 | 3.450525  | -0.874413 |
| C | -1.071812 | 3.663094  | -1.348076 | H | -0.622746 | 2.228359  | -4.015474 |
| N | -1.399571 | 3.315230  | -2.584988 | H | -5.749152 | 8.147137  | 2.137081  |
| O | -0.366091 | 1.670539  | -4.781515 | H | -9.519491 | -2.918237 | -2.871398 |
| O | 0.702869  | -1.336534 | 1.941438  | H | 3.724432  | 0.383759  | -6.766372 |
| H | 3.649416  | 0.559736  | -4.985545 | H | 6.367561  | 0.508205  | -3.496243 |
| H | 2.328881  | 1.175032  | -5.988132 | H | 3.536136  | 4.214774  | -3.096977 |
| H | 2.358953  | -3.352933 | -3.090238 | H | 4.211409  | -7.040823 | 2.635449  |
| H | 1.036968  | -2.483490 | -2.321814 | H | 0.773849  | -7.969701 | 7.470643  |
| H | 2.020227  | -5.685037 | -3.933720 | H | -0.522596 | 6.245690  | 5.068851  |
| H | -1.089898 | -3.605346 | -1.827404 | H | -3.035015 | -6.047974 | 5.389707  |
| H | 0.810156  | -7.822444 | -3.621978 | H | -2.145190 | 4.644102  | 0.246303  |
| H | -2.305136 | -5.739110 | -1.510483 | H | -0.478492 | 0.761763  | -4.458676 |
| H | -1.365485 | -7.858517 | -2.412686 | H | 0.159882  | -6.949622 | 6.159843  |
| H | 1.254633  | -3.171259 | -5.303382 | H | -2.441781 | 5.161349  | 3.502016  |
| H | -2.356888 | -5.313325 | -7.360067 | H | 1.838599  | -0.651432 | -3.850884 |
| H | -2.733669 | -5.342009 | -5.630030 | H | 3.852419  | 0.752195  | -2.321206 |
| H | -3.127074 | -2.982840 | -7.547735 | H | 4.105457  | -2.319153 | 2.027060  |
| H | -4.344211 | -3.684151 | -6.471263 | C | 0.440992  | -0.090067 | 0.504368  |
| H | -2.870596 | -1.483060 | -5.668770 | C | 1.200637  | -0.020496 | 1.750931  |
| H | -3.276565 | -2.744737 | -4.501680 | H | 0.858874  | 0.694077  | 2.504846  |
| H | -0.403352 | -4.811029 | -5.514185 | H | 0.948816  | -0.563016 | -0.326129 |
| H | 2.157803  | 2.188581  | -3.742926 | C | -0.991925 | 0.137649  | 0.367551  |
| H | 1.314477  | 3.322145  | -2.707036 | C | -1.804284 | 0.553657  | 1.439220  |

C -1.582797 -0.105159 -0.885794  
C -3.173533 0.719727 1.256743  
H -1.373753 0.710700 2.421370  
C -2.952956 0.069652 -1.064944  
H -0.967174 -0.416355 -1.723830  
C -3.751197 0.480518 0.004808  
H -3.793420 1.032208 2.091479  
H -3.390580 -0.114541 -2.040877  
H 2.285651 0.047100 1.624393  
H -4.461643 5.914935 -1.005536  
H -4.666595 7.546586 3.400143  
H -4.581573 4.421350 3.885392  
H -8.176993 -2.488858 -3.939573  
H -0.449029 -3.854869 -7.010378  
H 1.210169 4.572178 4.285368  
H -5.066593 2.699487 5.680726  
O 0.612224 5.802117 2.825257  
H -8.019460 -4.498783 -1.606843  
C -5.681002 -5.620691 -2.627441  
H -4.596049 -5.650687 -2.775592  
H -5.889924 -6.016949 -1.625861  
H -6.138782 -6.299888 -3.355541  
C -5.533532 -3.247205 -1.779079  
H -5.848931 -2.207646 -1.909221  
H -5.759306 -3.537772 -0.745325  
H -4.445230 -3.276339 -1.900077  
H 2.011830 -6.025096 8.442879  
S 1.756121 -3.132984 7.972061  
C 2.112684 -1.862181 6.705059  
H 2.274681 -0.921362 7.235381  
H 3.019445 -2.114199 6.148983  
H 1.273914 -1.743430 6.014896  
H -0.199881 6.210559 2.430103  
H -4.820484 0.613048 -0.132454

**Int1-S-SO-C1-r1**

C 2.691900 0.205700 -6.067600  
C 1.691537 -0.950404 -6.093760  
O 1.356720 -1.500426 -7.146345  
N 1.189113 -1.319651 -4.879405  
C 0.110100 -2.293400 -4.741800  
C -1.248651 -1.558164 -4.761279  
O -1.399226 -0.523879 -4.091175  
C 0.281371 -3.090847 -3.426163  
C -0.704534 -4.230009 -3.275652  
C -0.421938 -5.492608 -3.819383  
C -1.925048 -4.048593 -2.609787  
C -1.334222 -6.543405 -3.706829  
C -2.840275 -5.097245 -2.496129  
C -2.549013 -6.347653 -3.045617  
N -2.259644 -2.067813 -5.500001  
C -2.267100 -3.296300 -6.330100  
C -3.751781 -3.479872 -6.673150  
C -4.290954 -2.041558 -6.710656  
C -3.553317 -1.361052 -5.552079  
C 3.895000 2.685600 -2.414700  
C 5.009949 1.686182 -2.756994  
O 6.151600 2.116151 -2.948939  
C 2.386024 2.287695 -2.378183  
C 1.894297 1.000081 -1.721876  
O 1.312421 1.136400 -0.524512  
O 1.961286 -0.087803 -2.292969  
N 4.714969 0.364258 -2.756369

C 5.732200 -0.665600 -2.898600  
C 5.331035 -1.997773 -2.242643  
C 5.107787 -1.946261 -0.757888  
C 3.917846 -2.194484 -0.117550  
C 6.068078 -1.644726 0.278065  
C 5.375486 -1.719153 1.524398  
C 7.440278 -1.332036 0.288291  
N 4.071642 -2.064298 1.247627  
C 6.011184 -1.476496 2.747511  
C 8.075066 -1.094177 1.502627  
C 7.366273 -1.162307 2.720372  
C -3.323700 -5.021900 4.871500  
C -2.633013 -4.934298 3.656932  
C -3.093097 -4.038877 5.841028  
C -1.728139 -3.896789 3.404882  
C -2.194932 -2.999044 5.605305  
C -1.500723 -2.916471 4.384633  
O -0.635509 -1.881276 4.236160  
C -0.201900 -7.851300 6.151500  
C 0.321611 -6.780984 7.116922  
C 0.906633 -5.577236 6.374559  
C -9.037700 -0.794500 -2.496900  
C -8.590686 -1.943440 -3.407252  
C -7.756202 -3.037783 -2.712492  
C 2.255000 -7.141700 1.368900  
C 2.202535 -6.137362 2.340808  
C 1.840849 -6.832021 0.068427  
C 1.752140 -4.855685 2.030118  
C 1.393159 -5.555252 -0.257175  
C 1.334527 -4.516935 0.712483  
O 0.920071 -3.309975 0.383643  
C -3.084500 7.986700 3.306400  
C -1.972044 8.559966 2.430669  
C -0.707084 7.688988 2.308711  
O -0.875267 6.404045 2.421640  
O 0.370592 8.249778 2.068935  
C -3.173900 4.955400 5.645100  
C -1.704990 4.703759 6.013834  
O -1.417933 4.205538 7.109936  
C -3.953600 3.633700 5.787900  
N -0.771331 4.995508 5.073770  
C 0.644000 4.664700 5.263100  
C 1.353275 4.265240 3.956061  
C 0.638965 3.132766 3.213937  
C -3.455600 5.678300 -0.436800  
C -2.146340 5.133664 -0.888883  
C -1.775320 4.475944 -2.038289  
N -0.994241 5.225448 -0.136695  
C -0.000021 4.634113 -0.846696  
N -0.432104 4.162471 -2.008432  
O -0.187752 2.203756 -4.334433  
O 1.013879 -1.486656 2.064888  
H 3.378588 0.139654 -5.220175  
H 2.137237 1.146369 -5.977332  
H 1.304638 -3.479621 -3.416500  
H 0.191438 -2.399455 -2.583604  
H 0.525010 -5.653328 -4.329107  
H -2.154936 -3.080643 -2.172984  
H -1.093557 -7.514822 -4.129459  
H -3.777415 -4.938709 -1.969907  
H -3.258092 -7.165031 -2.951742  
H 0.191082 -2.964609 -5.598223  
H -3.890478 -4.022502 -7.611666

|   |           |           |           |                       |           |           |           |
|---|-----------|-----------|-----------|-----------------------|-----------|-----------|-----------|
| H | -4.246320 | -4.047537 | -5.877186 | H                     | 3.752335  | 0.059790  | -2.665611 |
| H | -4.022796 | -1.563034 | -7.659159 | H                     | 3.305467  | -2.135108 | 1.905541  |
| H | -5.376916 | -1.984701 | -6.600151 | C                     | 0.695817  | -0.065148 | 0.073183  |
| H | -3.387755 | -0.291426 | -5.698520 | C                     | 1.275908  | -0.212752 | 1.498914  |
| H | -4.085159 | -1.486589 | -4.600494 | H                     | 0.848591  | 0.552668  | 2.152865  |
| H | -1.858100 | -4.145652 | -5.781241 | H                     | 1.015120  | -0.925907 | -0.511575 |
| H | 2.005306  | 2.204737  | -3.399605 | C                     | -0.813518 | 0.040621  | 0.042040  |
| H | 1.848321  | 3.117725  | -1.924926 | C                     | -1.563556 | -1.144114 | 0.108082  |
| H | 4.182835  | 3.088692  | -1.436420 | C                     | -1.479860 | 1.270709  | 0.015730  |
| H | 6.127000  | -2.714485 | -2.487889 | C                     | -2.957750 | -1.092454 | 0.154916  |
| H | 4.423993  | -2.378843 | -2.728160 | H                     | -1.046016 | -2.099512 | 0.124091  |
| H | 2.952812  | -2.479054 | -0.513518 | C                     | -2.875741 | 1.316358  | 0.050224  |
| H | 8.000931  | -1.278076 | -0.640950 | H                     | -0.910695 | 2.190306  | -0.050905 |
| H | 9.133695  | -0.850243 | 1.516655  | C                     | -3.619131 | 0.137606  | 0.124390  |
| H | 5.464445  | -1.534596 | 3.684281  | H                     | -3.526785 | -2.016334 | 0.213163  |
| H | 7.887321  | -0.968172 | 3.653597  | H                     | -3.377459 | 2.278607  | 0.013694  |
| H | 6.655028  | -0.276717 | -2.459349 | H                     | 2.357218  | -0.027355 | 1.427160  |
| H | -2.794714 | -5.684131 | 2.886845  | H                     | -3.421790 | 6.765437  | -0.297317 |
| H | -3.616700 | -4.079396 | 6.792634  | H                     | -2.746478 | 7.853623  | 4.339216  |
| H | -1.194610 | -3.844807 | 2.459942  | H                     | -3.267658 | 5.358383  | 4.633616  |
| H | -2.014929 | -2.235910 | 6.356247  | H                     | -8.177546 | -0.316749 | -2.013783 |
| H | -0.165165 | -1.852066 | 3.364085  | H                     | -1.663529 | -3.140269 | -7.233145 |
| H | -0.492930 | -6.443982 | 7.769522  | H                     | -9.472304 | -2.410126 | -3.870799 |
| H | 1.735757  | -5.892378 | 5.731437  | C                     | -8.542757 | -3.769186 | -1.614504 |
| H | 0.146039  | -5.107299 | 5.743211  | H                     | -7.926206 | -4.540132 | -1.139756 |
| H | 0.595939  | -8.220899 | 5.498160  | H                     | -8.882541 | -3.089274 | -0.827480 |
| H | -7.997951 | -1.529459 | -4.233835 | H                     | -9.427726 | -4.263958 | -2.034820 |
| H | -6.893751 | -2.544822 | -2.238585 | C                     | -7.215121 | -4.039461 | -3.743057 |
| H | -9.714003 | -1.135784 | -1.706755 | H                     | -6.619870 | -3.536829 | -4.513581 |
| H | 1.869324  | -7.597929 | -0.704748 | H                     | -6.579164 | -4.795120 | -3.269013 |
| H | 2.520693  | -6.355049 | 3.358789  | H                     | -8.036132 | -4.564950 | -4.246940 |
| H | 1.069480  | -5.326497 | -1.268094 | H                     | 1.088206  | -7.214982 | 7.770932  |
| H | 1.710381  | -4.089621 | 2.800492  | S                     | 1.537536  | -4.318448 | 7.559475  |
| H | 0.999316  | -2.269536 | 1.345131  | C                     | 2.135960  | -3.045838 | 6.388820  |
| H | -2.348351 | 8.711362  | 1.408276  | H                     | 1.319859  | -2.658506 | 5.774026  |
| H | -1.658714 | 9.547934  | 2.783861  | H                     | 2.549275  | -2.232077 | 6.988682  |
| H | -3.402635 | 7.010283  | 2.933231  | H                     | 2.925314  | -3.449673 | 5.749387  |
| H | -3.820610 | 3.230161  | 6.794049  | H                     | 2.345073  | 3.904429  | 4.262723  |
| H | -5.022400 | 3.786503  | 5.608433  | O                     | 1.605660  | 5.373818  | 3.107824  |
| H | -3.572520 | 5.701283  | 6.342093  | H                     | 0.746801  | 5.750094  | 2.794893  |
| H | 1.215539  | 2.858220  | 2.326635  | H                     | -3.592942 | 2.889009  | 5.071171  |
| H | 0.528679  | 2.247043  | 3.849393  | H                     | -4.704476 | 0.176396  | 0.154092  |
| H | -0.358813 | 3.441247  | 2.888208  |                       |           |           |           |
| H | 0.685024  | 3.845372  | 5.985413  | <b>TS2-S-SO-C1-r1</b> |           |           |           |
| H | -4.227264 | 5.461244  | -1.179643 | C                     | 2.903200  | -0.242907 | -6.026199 |
| H | -3.773424 | 5.239675  | 0.516226  | C                     | 1.889879  | -1.391414 | -5.956045 |
| H | -2.398980 | 4.206423  | -2.879868 | O                     | 1.520243  | -1.982512 | -6.977995 |
| H | 1.011032  | 4.574368  | -0.469259 | N                     | 1.442081  | -1.707071 | -4.711366 |
| H | -0.221982 | 2.751753  | -3.526850 | C                     | 0.451078  | -2.753887 | -4.490800 |
| H | -3.957335 | 8.649241  | 3.324128  | C                     | -0.971457 | -2.169364 | -4.555939 |
| H | -9.565481 | -0.024186 | -3.069028 | O                     | -1.241679 | -1.106548 | -3.963555 |
| H | 3.251416  | 0.207990  | -7.003220 | C                     | 0.700884  | -3.465059 | -3.137244 |
| H | 5.946268  | -0.847899 | -3.961506 | C                     | -0.149339 | -4.704023 | -2.947148 |
| H | 3.989101  | 3.514574  | -3.120124 | C                     | 0.253943  | -5.934406 | -3.489018 |
| H | 2.607190  | -8.138564 | 1.618473  | C                     | -1.362258 | -4.651717 | -2.246475 |
| H | -0.609994 | -8.706838 | 6.699521  | C                     | -0.535846 | -7.077049 | -3.346279 |
| H | 1.185055  | 5.516306  | 5.697576  | C                     | -2.156035 | -5.791542 | -2.102649 |
| H | -4.024300 | -5.830584 | 5.053600  | C                     | -1.747773 | -7.007588 | -2.655196 |
| H | -0.910798 | 5.650345  | 0.805724  | N                     | -1.923589 | -2.830203 | -5.247020 |
| H | -0.558528 | 1.338871  | -4.090336 | C                     | -1.796903 | -4.094403 | -6.015800 |
| H | -0.996527 | -7.449522 | 5.513785  | C                     | -3.252506 | -4.458759 | -6.336417 |
| H | -1.034850 | 5.485844  | 4.217475  | C                     | -3.951187 | -3.094375 | -6.440173 |
| H | 1.404256  | -0.752291 | -4.064724 | C                     | -3.287981 | -2.274411 | -5.328110 |

|   |           |           |           |   |           |           |           |
|---|-----------|-----------|-----------|---|-----------|-----------|-----------|
| C | 3.808092  | 2.725294  | -2.641799 | H | 0.537185  | -2.770184 | -2.310372 |
| C | 4.995598  | 1.760196  | -2.828002 | H | 1.199435  | -5.996700 | -4.022719 |
| O | 6.096973  | 2.211922  | -3.172449 | H | -1.675789 | -3.715816 | -1.793585 |
| C | 2.350691  | 2.283572  | -2.948881 | H | -0.201814 | -8.020591 | -3.768717 |
| C | 1.664502  | 1.030670  | -2.317776 | H | -3.087114 | -5.732020 | -1.545916 |
| O | 1.270376  | 1.258111  | -0.967794 | H | -2.362187 | -7.895562 | -2.537757 |
| O | 2.144836  | -0.129273 | -2.570820 | H | 0.581406  | -3.473713 | -5.301739 |
| N | 4.807972  | 0.454658  | -2.522591 | H | -3.332186 | -5.058608 | -7.246467 |
| C | 5.882299  | -0.520699 | -2.689599 | H | -3.678102 | -5.038328 | -5.510045 |
| C | 5.429833  | -1.962776 | -2.411693 | H | -3.746902 | -2.638300 | -7.415306 |
| C | 5.348409  | -2.350448 | -0.963044 | H | -5.035418 | -3.155389 | -6.317382 |
| C | 4.221939  | -2.696270 | -0.254741 | H | -3.242141 | -1.203087 | -5.534623 |
| C | 6.458502  | -2.497930 | -0.050882 | H | -3.798710 | -2.404962 | -4.365405 |
| C | 5.920480  | -2.935246 | 1.195975  | H | -1.294202 | -4.863590 | -5.429570 |
| C | 7.851157  | -2.326665 | -0.161527 | H | 2.272584  | 2.095778  | -4.022292 |
| N | 4.557866  | -3.033406 | 1.041473  | H | 1.715090  | 3.150961  | -2.748059 |
| C | 6.730446  | -3.195439 | 2.308015  | H | 3.871862  | 3.077969  | -1.603075 |
| C | 8.658163  | -2.585121 | 0.941415  | H | 6.151739  | -2.619686 | -2.915899 |
| C | 8.102518  | -3.014374 | 2.165205  | H | 4.466163  | -2.140543 | -2.903365 |
| C | -3.117801 | -4.619001 | 5.277900  | H | 3.185232  | -2.739161 | -0.560349 |
| C | -2.515986 | -4.650291 | 4.013247  | H | 8.294549  | -2.000110 | -1.098429 |
| C | -2.878570 | -3.509863 | 6.097909  | H | 9.734008  | -2.454726 | 0.862622  |
| C | -1.689941 | -3.611085 | 3.568136  | H | 6.300645  | -3.529158 | 3.248080  |
| C | -2.058714 | -2.466403 | 5.669383  | H | 8.756963  | -3.207808 | 3.010589  |
| C | -1.451715 | -2.505136 | 4.400537  | H | 6.720284  | -0.253518 | -2.035191 |
| O | -0.654942 | -1.456662 | 4.069729  | H | -2.685949 | -5.498036 | 3.354530  |
| C | 0.141800  | -7.058100 | 6.955700  | H | -3.333285 | -3.452876 | 7.083522  |
| C | 0.604371  | -5.835137 | 7.757043  | H | -1.225885 | -3.653619 | 2.586196  |
| C | 1.067346  | -4.696606 | 6.845150  | H | -1.872792 | -1.606789 | 6.305930  |
| C | -8.847563 | -1.663101 | -2.674704 | H | -0.248668 | -1.500157 | 3.168955  |
| C | -8.407608 | -3.111119 | -2.916652 | H | -0.216021 | -5.480078 | 8.392840  |
| C | -6.922357 | -3.399672 | -2.618625 | H | 1.900090  | -5.027446 | 6.215004  |
| C | 2.707600  | -6.719198 | 2.189701  | H | 0.252027  | -4.372512 | 6.190995  |
| C | 2.505468  | -5.544143 | 2.919611  | H | 0.949853  | -7.450706 | 6.328802  |
| C | 2.282897  | -6.754426 | 0.855117  | H | -8.607940 | -3.371845 | -3.964638 |
| C | 1.903217  | -4.425427 | 2.340257  | H | -6.323047 | -2.695336 | -3.216498 |
| C | 1.685105  | -5.650641 | 0.259746  | H | -8.761343 | -1.379003 | -1.621362 |
| C | 1.470691  | -4.433346 | 0.975843  | H | 2.427364  | -7.660503 | 0.268488  |
| O | 0.926124  | -3.396349 | 0.401027  | H | 2.824762  | -5.494349 | 3.959356  |
| C | -3.701901 | 8.114900  | 2.238399  | H | 1.361307  | -5.690900 | -0.775855 |
| C | -2.483783 | 8.371502  | 1.351235  | H | 1.739163  | -3.522329 | 2.923609  |
| C | -1.412472 | 7.288030  | 1.512275  | H | 0.890469  | -2.127972 | 1.189332  |
| O | -1.834873 | 6.076320  | 1.574160  | H | -2.791366 | 8.381056  | 0.296149  |
| O | -0.213550 | 7.638747  | 1.575976  | H | -2.031434 | 9.345448  | 1.560497  |
| C | -3.666899 | 5.367300  | 4.906000  | H | -4.133276 | 7.136364  | 2.019069  |
| C | -2.190102 | 5.226925  | 5.319331  | H | -4.429913 | 4.682406  | 6.816367  |
| O | -1.887819 | 5.048440  | 6.506440  | H | -5.643089 | 4.689571  | 5.516311  |
| C | -4.594300 | 4.487900  | 5.754300  | H | -3.934759 | 6.422852  | 5.044758  |
| N | -1.258050 | 5.333765  | 4.334891  | H | 1.417730  | 3.367188  | 2.028124  |
| C | 0.172700  | 5.306699  | 4.660701  | H | 0.411319  | 2.836433  | 3.393928  |
| C | 1.143850  | 4.882243  | 3.541750  | H | -0.255809 | 3.941159  | 2.175816  |
| C | 0.645369  | 3.681435  | 2.736561  | H | 0.279008  | 4.616556  | 5.503009  |
| C | -3.788302 | 5.379402  | -1.223799 | H | -4.595150 | 5.106718  | -1.908270 |
| C | -2.602878 | 4.511956  | -1.452045 | H | -4.156227 | 5.281708  | -0.198124 |
| C | -2.312210 | 3.572181  | -2.408061 | H | -2.907298 | 3.247015  | -3.248130 |
| N | -1.509005 | 4.542074  | -0.611018 | H | 0.316734  | 3.405495  | -0.565518 |
| C | -0.615715 | 3.640828  | -1.050530 | H | -0.456347 | 2.023516  | -2.695459 |
| N | -1.069135 | 3.035825  | -2.143397 | H | -4.473203 | 8.878621  | 2.088247  |
| O | 0.225700  | 1.178927  | -3.168913 | H | -9.892224 | -1.516358 | -2.968955 |
| O | 0.844138  | -1.250456 | 1.735337  | H | 3.739569  | -0.556340 | -6.655913 |
| H | 3.267954  | 0.056555  | -5.043213 | H | 6.267833  | -0.453728 | -3.716323 |
| H | 2.427830  | 0.615948  | -6.510618 | H | 4.029413  | 3.589279  | -3.272518 |
| H | 1.760751  | -3.738652 | -3.116929 | H | 3.179044  | -7.583985 | 2.647746  |

|                        |           |           |           |   |           |           |           |
|------------------------|-----------|-----------|-----------|---|-----------|-----------|-----------|
| H                      | -0.186917 | -7.862253 | 7.622124  | C | 0.089975  | -7.267504 | -2.797889 |
| H                      | 0.501097  | 6.292010  | 5.020754  | C | -1.694306 | -6.016972 | -1.759548 |
| H                      | -3.757254 | -5.431068 | 5.608711  | C | -1.167444 | -7.236889 | -2.190092 |
| H                      | -1.462193 | 5.119344  | 0.259936  | N | -1.468187 | -3.234271 | -5.072191 |
| H                      | -0.193128 | 0.298077  | -3.289235 | C | -1.234000 | -4.540000 | -5.740000 |
| H                      | -0.695669 | -6.801509 | 6.298083  | C | -2.649427 | -5.005702 | -6.105446 |
| H                      | -1.544523 | 5.545309  | 3.375224  | C | -3.409180 | -3.692213 | -6.346490 |
| H                      | 1.709059  | -1.107373 | -3.914586 | C | -2.852614 | -2.761484 | -5.263190 |
| H                      | 3.844559  | 0.110724  | -2.411070 | C | 3.804000  | 2.805000  | -2.580000 |
| H                      | 3.900794  | -3.432028 | 1.703633  | C | 5.064057  | 1.915452  | -2.605590 |
| C                      | 0.642945  | 0.114542  | -0.296465 | O | 6.166887  | 2.434988  | -2.840951 |
| C                      | 1.428174  | -0.192743 | 0.994078  | C | 2.414733  | 2.238363  | -2.982725 |
| H                      | 1.465028  | 0.697500  | 1.632736  | C | 1.712961  | 0.975826  | -2.352825 |
| H                      | 0.755337  | -0.745335 | -0.958118 | O | 1.286272  | 1.296717  | -0.971473 |
| C                      | -0.841670 | 0.332785  | -0.031871 | O | 2.362133  | -0.165855 | -2.420469 |
| C                      | -1.298174 | 1.106798  | 1.043659  | N | 4.914919  | 0.608031  | -2.297451 |
| C                      | -1.795672 | -0.297449 | -0.840980 | C | 6.051000  | -0.311000 | -2.298000 |
| C                      | -2.662071 | 1.263007  | 1.292386  | C | 5.627711  | -1.785026 | -2.488195 |
| H                      | -0.585497 | 1.584251  | 1.704901  | C | 5.450520  | -2.561384 | -1.214548 |
| C                      | -3.162988 | -0.147574 | -0.595959 | C | 4.290394  | -2.771750 | -0.505009 |
| H                      | -1.473387 | -0.904153 | -1.680481 | C | 6.495936  | -3.229586 | -0.478732 |
| C                      | -3.602647 | 0.635849  | 0.471401  | C | 5.887906  | -3.828219 | 0.663984  |
| H                      | -2.988657 | 1.868635  | 2.133259  | C | 7.880483  | -3.393848 | -0.671613 |
| H                      | -3.882031 | -0.646671 | -1.240331 | N | 4.547620  | -3.529976 | 0.618298  |
| H                      | 2.463520  | -0.427615 | 0.708270  | C | 6.620679  | -4.575356 | 1.594921  |
| H                      | -3.554784 | 6.438294  | -1.384343 | C | 8.611616  | -4.131530 | 0.252880  |
| H                      | -3.424316 | 8.127269  | 3.297583  | C | 7.986939  | -4.716745 | 1.375780  |
| H                      | -3.783033 | 5.157426  | 3.837762  | C | -3.123000 | -4.380000 | 5.484000  |
| H                      | -8.237529 | -0.962932 | -3.257358 | C | -2.475296 | -4.453143 | 4.243515  |
| H                      | -1.215971 | -3.913283 | -6.928479 | C | -2.971753 | -3.212953 | 6.242204  |
| H                      | -9.027757 | -3.789010 | -2.312051 | C | -1.689758 | -3.399505 | 3.760572  |
| C                      | -6.550014 | -4.822778 | -3.059118 | C | -2.193134 | -2.153451 | 5.776695  |
| H                      | -6.760464 | -4.980576 | -4.122969 | C | -1.541841 | -2.235389 | 4.532458  |
| H                      | -5.486199 | -5.025291 | -2.892931 | O | -0.794236 | -1.162916 | 4.160906  |
| H                      | -7.121659 | -5.568845 | -2.493008 | C | 0.170000  | -6.507000 | 7.487000  |
| C                      | -6.566194 | -3.182483 | -1.140408 | C | 0.783100  | -5.241921 | 8.099445  |
| H                      | -6.752922 | -2.153977 | -0.817386 | C | 1.080517  | -4.178213 | 7.039747  |
| H                      | -7.155947 | -3.847330 | -0.496565 | C | -8.575000 | -2.302000 | -2.929000 |
| H                      | -5.507854 | -3.396269 | -0.956738 | C | -7.980351 | -3.711882 | -2.842616 |
| H                      | -4.404027 | 3.424703  | 5.575310  | C | -6.459388 | -3.762780 | -2.597063 |
| H                      | 2.052231  | 4.571974  | 4.077328  | C | 2.964000  | -6.341000 | 2.842000  |
| O                      | 1.573149  | 5.947075  | 2.712970  | C | 2.896304  | -5.040747 | 3.354479  |
| H                      | 0.815070  | 6.400513  | 2.270304  | C | 2.226953  | -6.635254 | 1.685597  |
| H                      | 1.422032  | -6.120571 | 8.430511  | C | 2.127453  | -4.053808 | 2.731653  |
| S                      | 1.627892  | -3.248894 | 7.833222  | C | 1.454608  | -5.668190 | 1.053580  |
| C                      | 2.114796  | -2.110934 | 6.485270  | C | 1.373409  | -4.326247 | 1.544530  |
| H                      | 1.267989  | -1.882386 | 5.833806  | O | 0.658168  | -3.422866 | 0.937754  |
| H                      | 2.462494  | -1.189376 | 6.957041  | C | -4.237900 | 8.066100  | 1.533900  |
| H                      | 2.931360  | -2.536486 | 5.896376  | C | -2.740933 | 8.387121  | 1.417525  |
| H                      | -4.664978 | 0.751879  | 0.667824  | C | -2.108844 | 7.396178  | 0.443773  |
| <b>Int2-S-SO-C1-r1</b> |           |           |           |   |           |           |           |
| C                      | 3.243000  | -0.432000 | -5.788000 | O | -1.774539 | 6.248073  | 0.966047  |
| C                      | 2.266377  | -1.611050 | -5.688692 | O | -2.023337 | 7.673015  | -0.760411 |
| O                      | 1.941731  | -2.258587 | -6.692910 | C | -4.195000 | 5.509900  | 4.386100  |
| N                      | 1.803812  | -1.889249 | -4.441499 | C | -2.736098 | 5.454112  | 4.872670  |
| C                      | 0.854000  | -2.971000 | -4.204000 | O | -2.476635 | 5.322367  | 6.073889  |
| C                      | -0.590573 | -2.475408 | -4.382963 | C | -5.141000 | 4.729000  | 5.304900  |
| O                      | -0.944493 | -1.392157 | -3.879120 | N | -1.759459 | 5.573004  | 3.931305  |
| C                      | 1.059196  | -3.569758 | -2.788624 | C | -0.350000 | 5.656000  | 4.335100  |
| C                      | 0.284825  | -4.850418 | -2.560916 | C | 0.659755  | 5.393692  | 3.211088  |
| C                      | 0.807283  | -6.083370 | -2.979762 | C | 0.505268  | 4.013816  | 2.570609  |
| C                      | -0.972446 | -4.835480 | -1.941521 | C | -3.990100 | 5.103000  | -1.727900 |
|                        |           |           |           | C | -2.740961 | 4.306158  | -1.845913 |
|                        |           |           |           | C | -2.382820 | 3.298243  | -2.700504 |

|   |           |           |           |                       |           |           |           |
|---|-----------|-----------|-----------|-----------------------|-----------|-----------|-----------|
| N | -1.675554 | 4.482511  | -0.981649 | H                     | -4.487285 | 6.567647  | 4.362200  |
| C | -0.720291 | 3.606513  | -1.291603 | H                     | 1.287117  | 3.859836  | 1.821065  |
| N | -1.121597 | 2.880919  | -2.335181 | H                     | 0.585080  | 3.220072  | 3.321135  |
| O | 0.476529  | 0.930279  | -3.158590 | H                     | -0.467099 | 3.918204  | 2.079752  |
| O | 0.815661  | -1.058039 | 1.863958  | H                     | -0.197826 | 4.933534  | 5.142585  |
| C | 0.654201  | 0.184572  | -0.276227 | H                     | -4.657729 | 4.888471  | -2.565392 |
| C | 1.430812  | -0.088524 | 1.029901  | H                     | -4.522771 | 4.865133  | -0.800177 |
| C | -0.833482 | 0.409845  | -0.021519 | H                     | -2.921933 | 2.847623  | -3.517824 |
| C | -1.292219 | 1.171749  | 1.062224  | H                     | 0.213148  | 3.454309  | -0.776044 |
| C | -1.788066 | -0.191488 | -0.853333 | H                     | -0.565154 | 2.068635  | -2.718423 |
| C | -2.656632 | 1.347425  | 1.297240  | H                     | -4.736654 | 8.730398  | 2.247590  |
| C | -3.155590 | -0.023223 | -0.620872 | H                     | -9.643089 | -2.340791 | -3.168061 |
| C | -3.596712 | 0.749856  | 0.454018  | H                     | 4.127153  | -0.760091 | -6.341150 |
| H | 3.535100  | -0.045831 | -4.811515 | H                     | 6.723664  | -0.002791 | -3.106826 |
| H | 2.769695  | 0.367007  | -6.367445 | H                     | 4.025227  | 3.649548  | -3.237373 |
| H | 2.131474  | -3.759867 | -2.678249 | H                     | 3.566708  | -7.101744 | 3.329319  |
| H | 0.785079  | -2.830180 | -2.031810 | H                     | -0.040360 | -7.254413 | 8.259072  |
| H | 1.789143  | -6.114969 | -3.446209 | H                     | -0.138725 | 6.649687  | 4.754186  |
| H | -1.376028 | -3.894736 | -1.579576 | H                     | -3.730632 | -5.204600 | 5.842875  |
| H | 0.515486  | -8.212294 | -3.124522 | H                     | -1.644536 | 5.212855  | -0.193534 |
| H | -2.662060 | -5.985899 | -1.266768 | H                     | 0.170009  | 0.004628  | -3.259345 |
| H | -1.726425 | -8.156555 | -2.042821 | H                     | -0.769844 | -6.279104 | 6.972626  |
| H | 1.066227  | -3.740276 | -4.950054 | H                     | -1.992913 | 5.792375  | 2.961492  |
| H | -2.648628 | -5.673815 | -6.970384 | H                     | 2.026007  | -1.234195 | -3.660034 |
| H | -3.089473 | -5.546012 | -5.260222 | H                     | 3.949561  | 0.222098  | -2.227528 |
| H | -3.171481 | -3.295763 | -7.339922 | H                     | 3.849933  | -3.807241 | 1.303204  |
| H | -4.494339 | -3.802916 | -6.278451 | H                     | 1.518831  | 0.842980  | 1.602644  |
| H | -2.850622 | -1.706010 | -5.543835 | H                     | 0.760848  | -0.699455 | -0.909332 |
| H | -3.409298 | -2.853264 | -4.321758 | H                     | -0.579198 | 1.618650  | 1.744963  |
| H | -0.724413 | -5.236453 | -5.073765 | H                     | -1.463159 | -0.793325 | -1.696348 |
| H | 2.450703  | 1.985299  | -4.046512 | H                     | -2.983932 | 1.941507  | 2.146313  |
| H | 1.710872  | 3.074380  | -2.905922 | H                     | -3.875795 | -0.501016 | -1.280039 |
| H | 3.751738  | 3.215129  | -1.561613 | H                     | 2.451702  | -0.387557 | 0.751860  |
| H | 6.401255  | -2.277752 | -3.089680 | H                     | -3.760699 | 6.172544  | -1.714893 |
| H | 4.711213  | -1.820327 | -3.086272 | H                     | -4.391469 | 7.036367  | 1.865454  |
| H | 3.287524  | -2.428558 | -0.715246 | H                     | -4.259425 | 5.146468  | 3.354490  |
| H | 8.374203  | -2.949094 | -1.531958 | H                     | -8.081622 | -1.712810 | -3.710934 |
| H | 9.681206  | -4.261853 | 0.111948  | H                     | -0.614508 | -4.390933 | -6.632939 |
| H | 6.131649  | -5.031494 | 2.450495  | H                     | -8.486375 | -4.275921 | -2.045593 |
| H | 8.583744  | -5.289744 | 2.080113  | C                     | -6.060993 | -3.150191 | -1.246075 |
| H | 6.627654  | -0.210585 | -1.368293 | H                     | -4.976588 | -3.194048 | -1.098894 |
| H | -2.576452 | -5.347454 | 3.633876  | H                     | -6.360446 | -2.100844 | -1.164233 |
| H | -3.463347 | -3.122677 | 7.207493  | H                     | -6.530113 | -3.696493 | -0.417987 |
| H | -1.187450 | -3.473110 | 2.798154  | C                     | -5.943359 | -5.204886 | -2.708290 |
| H | -2.074935 | -1.248440 | 6.364841  | H                     | -6.191417 | -5.644416 | -3.681116 |
| H | -0.339686 | -1.250958 | 3.288686  | H                     | -4.855654 | -5.249717 | -2.586296 |
| H | 0.098298  | -4.826756 | 8.849419  | H                     | -6.389888 | -5.840156 | -1.933089 |
| H | 1.781298  | -4.565720 | 6.292584  | O                     | 0.670056  | 6.432729  | 2.240695  |
| H | 0.162533  | -3.883090 | 6.522209  | H                     | -0.160144 | 6.364649  | 1.721880  |
| H | 0.847791  | -6.960758 | 6.755765  | H                     | 1.643965  | 5.440940  | 3.696217  |
| H | -8.198999 | -4.246300 | -3.777039 | H                     | -4.912683 | 3.658781  | 5.288160  |
| H | -5.977074 | -3.171301 | -3.390982 | H                     | 1.708740  | -5.498474 | 8.629547  |
| H | -8.470280 | -1.754786 | -1.987037 | S                     | 1.819248  | -2.679338 | 7.812854  |
| H | 2.261741  | -7.640665 | 1.268626  | C                     | 2.145327  | -1.666009 | 6.324437  |
| H | 3.458856  | -4.784610 | 4.251125  | H                     | 2.567435  | -0.720532 | 6.672126  |
| H | 0.892956  | -5.910138 | 0.156182  | H                     | 2.871350  | -2.158301 | 5.672643  |
| H | 2.084099  | -3.047426 | 3.139884  | H                     | 1.226419  | -1.464959 | 5.768577  |
| H | 0.803325  | -1.991551 | 1.432281  | H                     | -4.659628 | 0.878418  | 0.639734  |
| H | -2.600423 | 9.404641  | 1.040854  |                       |           |           |           |
| H | -2.259427 | 8.305447  | 2.397267  |                       |           |           |           |
| H | -4.731641 | 8.184312  | 0.563626  | <b>TS3-S-SO-C1-r1</b> |           |           |           |
| H | -5.039370 | 5.074678  | 6.335775  | C                     | 2.857900  | -0.802300 | -6.037800 |
| H | -6.180227 | 4.860358  | 4.989003  | C                     | 1.775808  | -1.880139 | -5.900753 |
|   |           |           |           | O                     | 1.306446  | -2.448946 | -6.893687 |



|   |           |           |           |   |           |           |           |
|---|-----------|-----------|-----------|---|-----------|-----------|-----------|
| N | 1.381011  | -2.166103 | -4.630204 | C | -4.312900 | 5.163800  | 5.602400  |
| C | 0.278000  | -3.083200 | -4.361100 | N | -0.880333 | 5.631196  | 4.102696  |
| C | -1.068511 | -2.366689 | -4.573692 | C | 0.546700  | 5.438000  | 4.363000  |
| O | -1.229683 | -1.205653 | -4.151345 | C | 1.306228  | 4.678601  | 3.266338  |
| C | 0.397792  | -3.636988 | -2.920404 | C | 0.668465  | 3.328201  | 2.943418  |
| C | -0.625777 | -4.700433 | -2.585202 | C | -3.453800 | 5.440500  | -1.495100 |
| C | -0.416350 | -6.037950 | -2.955063 | C | -2.142174 | 4.748065  | -1.284701 |
| C | -1.807349 | -4.376323 | -1.905009 | C | -1.633862 | 3.587509  | -1.812102 |
| C | -1.363410 | -7.022402 | -2.664448 | N | -1.166094 | 5.218462  | -0.419323 |
| C | -2.756375 | -5.357414 | -1.610618 | C | -0.131102 | 4.367278  | -0.423750 |
| C | -2.540190 | -6.683542 | -1.992969 | N | -0.385202 | 3.369419  | -1.264162 |
| N | -2.072413 | -3.013034 | -5.200010 | O | 0.428375  | 0.954502  | -3.497121 |
| C | -2.057800 | -4.367000 | -5.802400 | O | 0.513199  | -1.298335 | 1.495497  |
| C | -3.536203 | -4.625874 | -6.120444 | H | 3.267457  | -0.491986 | -5.076202 |
| C | -4.087563 | -3.224551 | -6.425221 | H | 2.420661  | 0.066227  | -6.540018 |
| C | -3.365234 | -2.333020 | -5.408450 | H | 1.406307  | -4.050528 | -2.822793 |
| C | 3.963000  | 2.277500  | -2.816500 | H | 0.326270  | -2.817594 | -2.202656 |
| C | 5.074231  | 1.225532  | -3.007554 | H | 0.502331  | -6.310540 | -3.469426 |
| O | 6.181421  | 1.578768  | -3.439276 | H | -1.974316 | -3.350837 | -1.587613 |
| C | 2.493118  | 2.026773  | -3.247636 | H | -1.178004 | -8.052719 | -2.955029 |
| C | 1.614814  | 0.829214  | -2.787180 | H | -3.658657 | -5.088129 | -1.068873 |
| O | 1.063530  | 1.270079  | -1.136441 | H | -3.275665 | -7.447564 | -1.758012 |
| O | 2.118070  | -0.340837 | -2.685483 | H | 0.364929  | -3.905570 | -5.075113 |
| N | 4.826340  | -0.038070 | -2.588640 | H | -3.659418 | -5.331202 | -6.946144 |
| C | 5.844500  | -1.082300 | -2.708100 | H | -4.034927 | -5.044650 | -5.239544 |
| C | 5.336908  | -2.465092 | -2.276620 | H | -3.817089 | -2.925961 | -7.444211 |
| C | 5.228199  | -2.685895 | -0.795380 | H | -5.174559 | -3.159284 | -6.332656 |
| C | 4.078764  | -2.921956 | -0.080081 | H | -3.197770 | -1.311212 | -5.755678 |
| C | 6.316470  | -2.761415 | 0.151346  | H | -3.909921 | -2.274934 | -4.457453 |
| C | 5.741922  | -3.045644 | 1.426478  | H | -1.645089 | -5.101735 | -5.111314 |
| C | 7.715377  | -2.641068 | 0.054700  | H | 2.477348  | 1.917848  | -4.338553 |
| N | 4.379591  | -3.122073 | 1.253154  | H | 1.936897  | 2.946534  | -3.041115 |
| C | 6.522415  | -3.204819 | 2.577671  | H | 3.977528  | 2.534875  | -1.748075 |
| C | 8.493267  | -2.800001 | 1.196894  | H | 6.035536  | -3.200236 | -2.699575 |
| C | 7.901997  | -3.077991 | 2.447129  | H | 4.369162  | -2.659485 | -2.754467 |
| C | -3.309700 | -4.233500 | 5.510700  | H | 3.046530  | -2.978113 | -0.401262 |
| C | -2.782002 | -4.390391 | 4.222829  | H | 8.186770  | -2.431149 | -0.901661 |
| C | -2.952223 | -3.092017 | 6.238249  | H | 9.573820  | -2.708428 | 1.128157  |
| C | -1.913950 | -3.443480 | 3.666573  | H | 6.065138  | -3.421978 | 3.538760  |
| C | -2.089272 | -2.139264 | 5.697521  | H | 8.533880  | -3.196170 | 3.323013  |
| C | -1.555264 | -2.304135 | 4.405890  | H | 6.721213  | -0.796525 | -2.115239 |
| O | -0.705223 | -1.342931 | 3.964442  | H | -3.043701 | -5.265695 | 3.633865  |
| C | -0.183000 | -6.769900 | 7.294000  | H | -3.347804 | -2.937774 | 7.238839  |
| C | 0.312583  | -5.512614 | 8.019019  | H | -1.507115 | -3.586193 | 2.669389  |
| C | 0.867710  | -4.471882 | 7.043549  | H | -1.812985 | -1.254634 | 6.263009  |
| C | -8.926600 | -1.359000 | -2.551700 | H | -0.379510 | -1.452925 | 3.033923  |
| C | -8.578264 | -2.849348 | -2.627886 | H | -0.511450 | -5.069211 | 8.591267  |
| C | -7.074537 | -3.172248 | -2.524900 | H | 1.709623  | -4.888487 | 6.479917  |
| C | 2.357100  | -6.826300 | 2.502600  | H | 0.096164  | -4.164393 | 6.330693  |
| C | 2.116875  | -5.609190 | 3.148683  | H | 0.624751  | -7.246475 | 6.727862  |
| C | 2.076630  | -6.915136 | 1.132218  | H | -8.955845 | -3.253365 | -3.576968 |
| C | 1.617212  | -4.503699 | 2.456645  | H | -6.558689 | -2.598738 | -3.310864 |
| C | 1.582615  | -5.825569 | 0.425868  | H | -8.657581 | -0.924548 | -1.583985 |
| C | 1.330543  | -4.567061 | 1.055713  | H | 2.252552  | -7.852840 | 0.606859  |
| O | 0.888280  | -3.549592 | 0.373087  | H | 2.322373  | -5.516197 | 4.213802  |
| C | -3.178900 | 8.340200  | 1.820600  | H | 1.365799  | -5.908111 | -0.635212 |
| C | -1.833952 | 8.990646  | 2.147288  | H | 1.417918  | -3.569723 | 2.977959  |
| C | -0.624994 | 8.243112  | 1.565922  | H | 0.679548  | -2.204576 | 1.040344  |
| O | -0.726673 | 6.942313  | 1.589048  | H | -1.797187 | 10.028924 | 1.803566  |
| O | 0.354921  | 8.873755  | 1.158929  | H | -1.694860 | 9.016562  | 3.237736  |
| C | -3.280600 | 5.735600  | 4.626400  | H | -3.370910 | 8.356013  | 0.741406  |
| C | -1.838113 | 5.371274  | 5.032059  | H | -4.114660 | 5.508797  | 6.619637  |
| O | -1.589876 | 4.885369  | 6.140616  | H | -5.323168 | 5.474092  | 5.318106  |

H -3.354399 6.829744 4.590648  
H 1.260783 2.809057 2.185033  
H 0.616732 2.693698 3.835185  
H -0.347455 3.460088 2.560906  
H 0.619603 4.889800 5.304952  
H -4.064541 4.870877 -2.198429  
H -4.009094 5.531412 -0.555629  
H -2.070658 2.891593 -2.509189  
H 0.745752 4.484704 0.198869  
H 0.235329 2.428038 -1.289157  
H -4.005828 8.867631 2.309049  
H -10.000542 -1.199249 -2.695181  
H 3.655602 -1.187690 -6.677970  
H 6.187040 -1.132514 -3.750959  
H 4.311554 3.162054 -3.353786  
H 2.747648 -7.679577 3.049587  
H -0.572868 -7.504902 8.005738  
H 1.035006 6.412050 4.505480  
H -3.982791 -4.974835 5.929230  
H -1.182139 6.028663 0.237710  
H 0.007304 0.073386 -3.592882  
H -0.984769 -6.524687 6.589325  
H -1.121855 6.111260 3.231585  
H 1.676556 -1.534541 -3.868113  
H 3.840145 -0.293221 -2.431308  
H 3.702491 -3.448341 1.932722  
C 0.390156 0.164911 -0.504203  
C 1.150935 -0.250006 0.776735  
H 1.247860 0.613543 1.445142  
H 0.451726 -0.688922 -1.190152  
C -1.094408 0.432079 -0.235430  
C -1.544563 1.016652 0.957515  
C -2.056205 0.072517 -1.191124  
C -2.901954 1.253446 1.181129  
H -0.834427 1.274061 1.734534  
C -3.417066 0.304244 -0.971304  
H -1.743350 -0.396052 -2.118344  
C -3.846993 0.900245 0.215338  
H -3.221532 1.703387 2.117419  
H -4.140567 0.011697 -1.728293  
H 2.167949 -0.537161 0.476863  
H -3.316801 6.449049 -1.899864  
H -3.197543 7.298460 2.141927  
H -3.466364 5.382119 3.605681  
H -8.400331 -0.790721 -3.327617  
H -1.446540 -4.358351 -6.713599  
H 2.309669 4.494856 3.676151  
H -4.280440 4.070713 5.613134  
O 1.515448 5.458702 2.088318  
H 0.736035 6.041121 1.912323  
H -9.111617 -3.392281 -1.833980  
C -6.824627 -4.663731 -2.792622  
H -5.755662 -4.900926 -2.761031  
H -7.323372 -5.284248 -2.037431  
H -7.208288 -4.963819 -3.774375  
C -6.475729 -2.759564 -1.172051  
H -6.581676 -1.687201 -0.982216  
H -6.967234 -3.294668 -0.349675  
H -5.406677 -2.993160 -1.128307  
H 1.088457 -5.784430 8.745461  
C 2.021580 -1.960457 6.527161  
H 1.199978 -1.745971 5.839715  
H 2.397416 -1.021759 6.939837

H 2.832115 -2.460755 5.991159  
S 1.455582 -2.976045 7.940053  
H -4.904555 1.078152 0.391237

**Prod-S-SO-C1-r1**

C 2.782410 -0.262731 -6.150196  
C 1.732733 -1.372911 -6.105381  
O 1.219774 -1.824226 -7.132783  
N 1.380137 -1.824855 -4.864511  
C 0.232321 -2.713967 -4.681369  
C -1.067234 -1.918835 -4.907511  
O -1.164353 -0.753270 -4.469542  
C 0.294204 -3.315442 -3.256164  
C -0.734931 -4.388555 -2.974574  
C -0.574705 -5.683803 -3.491386  
C -1.856438 -4.124268 -2.178332  
C -1.516190 -6.682528 -3.235818  
C -2.798382 -5.121774 -1.916059  
C -2.635155 -6.402762 -2.448018  
N -2.091184 -2.506009 -5.558768  
C -2.125696 -3.844802 -6.211931  
C -3.602307 -4.009080 -6.592555  
C -4.068869 -2.570047 -6.861556  
C -3.342271 -1.755696 -5.785159  
C 3.937790 2.463511 -2.640608  
C 4.816554 1.358056 -3.241530  
O 5.234629 1.456237 -4.401316  
C 2.582396 2.579997 -3.367927  
C 1.750546 1.309644 -3.374575  
O 0.903779 1.341280 -0.035075  
O 2.094924 0.251886 -2.862800  
N 5.101235 0.295730 -2.441801  
C 5.823594 -0.884203 -2.917390  
C 5.156707 -2.217444 -2.551616  
C 5.154959 -2.557732 -1.087823  
C 4.040578 -2.803538 -0.320611  
C 6.296698 -2.778497 -0.227656  
C 5.786456 -3.151473 1.051993  
C 7.692561 -2.727489 -0.403625  
N 4.412830 -3.141927 0.964768  
C 6.622982 -3.456995 2.131504  
C 8.526627 -3.033523 0.666708  
C 7.997097 -3.392933 1.923437  
C -3.191801 -4.907003 5.071200  
C -2.939121 -4.700608 3.712313  
C -2.448876 -4.193851 6.016645  
C -1.951306 -3.809714 3.294328  
C -1.457716 -3.300297 5.614211  
C -1.192000 -3.106981 4.247606  
O -0.199049 -2.257100 3.904532  
C -0.034100 -7.609097 6.526302  
C 0.613025 -6.509541 7.377214  
C 1.396317 -5.515543 6.517897  
C -8.942610 -1.213512 -2.551199  
C -8.561010 -2.680262 -2.776386  
C -7.049790 -2.976014 -2.712121  
C 2.426999 -7.154000 1.714992  
C 2.091681 -6.040742 2.490861  
C 2.256748 -7.073472 0.326928  
C 1.601395 -4.871655 1.907922  
C 1.769890 -5.916668 -0.271276  
C 1.417934 -4.767498 0.495921  
O 0.975793 -3.681236 -0.085358

|   |           |           |           |   |            |           |           |
|---|-----------|-----------|-----------|---|------------|-----------|-----------|
| C | -3.132001 | 7.985700  | 2.724901  | H | 1.634628   | -5.865785 | -1.348111 |
| C | -1.798265 | 8.644038  | 3.078190  | H | 1.325494   | -4.025011 | 2.530858  |
| C | -0.582182 | 7.959937  | 2.432631  | H | 0.425890   | -2.665170 | 0.756908  |
| O | -0.674592 | 6.666180  | 2.340623  | H | -1.788582  | 9.703404  | 2.802910  |
| O | 0.390944  | 8.638359  | 2.083507  | H | -1.644638  | 8.603077  | 4.166423  |
| C | -3.185497 | 5.099899  | 5.241902  | H | -3.338768  | 8.070839  | 1.651696  |
| C | -1.740371 | 4.681238  | 5.578042  | H | -3.981962  | 4.929641  | 7.260857  |
| O | -1.492600 | 3.966112  | 6.555632  | H | -5.214710  | 4.887161  | 5.984699  |
| C | -4.203800 | 4.565800  | 6.254099  | H | -3.228301  | 6.194230  | 5.196533  |
| N | -0.783650 | 5.157112  | 4.739475  | H | 0.982288   | 2.579173  | 2.238787  |
| C | 0.637195  | 4.841400  | 4.886499  | H | 0.355660   | 2.265006  | 3.873713  |
| C | 1.291243  | 4.214104  | 3.640468  | H | -0.508412  | 3.358731  | 2.781325  |
| C | 0.485893  | 3.031674  | 3.100137  | H | 0.714437   | 4.150943  | 5.729706  |
| C | -3.458904 | 5.450704  | -0.873001 | H | -4.054559  | 5.008137  | -1.675245 |
| C | -2.079635 | 4.874230  | -0.887722 | H | -3.972141  | 5.250955  | 0.074965  |
| C | -1.489444 | 3.927226  | -1.693033 | H | -1.932783  | 3.392839  | -2.521903 |
| N | -1.097178 | 5.230919  | 0.016438  | H | 0.903378   | 4.570052  | 0.338039  |
| C | 0.008371  | 4.500213  | -0.264926 | H | 0.487872   | 2.002337  | -0.628748 |
| N | -0.185301 | 3.692076  | -1.297948 | H | -3.965293  | 8.457110  | 3.258522  |
| O | 0.605159  | 1.448572  | -4.050182 | H | -10.019985 | -1.064296 | -2.679807 |
| O | 0.001197  | -1.899649 | 1.347719  | H | 3.387677   | -0.395364 | -7.048736 |
| H | 3.428327  | -0.231276 | -5.274012 | H | 5.896169   | -0.783480 | -4.002774 |
| H | 2.262996  | 0.697290  | -6.234512 | H | 4.474587   | 3.408972  | -2.755090 |
| H | 1.298199  | -3.730765 | -3.128620 | H | 2.808965   | -8.059678 | 2.177448  |
| H | 0.196934  | -2.511313 | -2.522795 | H | -0.577834  | -8.321548 | 7.155430  |
| H | 0.301752  | -5.913565 | -4.093105 | H | 1.196182   | 5.751192  | 5.142778  |
| H | -1.981338 | -3.137027 | -1.742739 | H | -3.963000  | -5.602866 | 5.387946  |
| H | -1.369932 | -7.679352 | -3.642267 | H | -1.145501  | 5.877882  | 0.819441  |
| H | -3.653176 | -4.901083 | -1.283303 | H | 0.101438   | 0.594299  | -4.071235 |
| H | -3.365165 | -7.179270 | -2.238628 | H | -0.744312  | -7.183184 | 5.810261  |
| H | 0.314668  | -3.507472 | -5.427044 | H | -1.035196  | 5.739314  | 3.935497  |
| H | -3.730069 | -4.674654 | -7.449906 | H | 1.682023   | -1.286245 | -4.054313 |
| H | -4.156446 | -4.434230 | -5.748627 | H | 4.608033   | 0.215569  | -1.563224 |
| H | -3.745105 | -2.247769 | -7.857502 | H | 3.769255   | -3.515842 | 1.649830  |
| H | -5.153808 | -2.452007 | -6.805665 | C | 0.156155   | 0.125383  | -0.052444 |
| H | -3.111867 | -0.731190 | -6.084499 | C | 0.691592   | -0.682220 | 1.140529  |
| H | -3.917957 | -1.708175 | -4.852090 | H | 0.596412   | -0.066887 | 2.043376  |
| H | -1.779534 | -4.621933 | -5.531169 | H | 0.376871   | -0.432991 | -0.974853 |
| H | 2.739118  | 2.867121  | -4.413512 | C | -1.347490  | 0.357063  | -0.002594 |
| H | 1.966790  | 3.362857  | -2.911329 | C | -1.971701  | 0.895511  | 1.132408  |
| H | 3.765920  | 2.297708  | -1.572659 | C | -2.138386  | 0.061114  | -1.120382 |
| H | 5.698554  | -2.994743 | -3.109405 | C | -3.347384  | 1.123493  | 1.151190  |
| H | 4.129308  | -2.221684 | -2.931695 | H | -1.379475  | 1.136538  | 2.008956  |
| H | 2.989757  | -2.809208 | -0.584278 | C | -3.517979  | 0.288575  | -1.105696 |
| H | 8.120116  | -2.460743 | -1.366165 | H | -1.673716  | -0.337942 | -2.018709 |
| H | 9.604449  | -2.996516 | 0.534644  | C | -4.127537  | 0.819813  | 0.031262  |
| H | 6.211220  | -3.737995 | 3.096584  | H | -3.812691  | 1.536997  | 2.041904  |
| H | 8.672500  | -3.625773 | 2.741811  | H | -4.111319  | 0.055190  | -1.985782 |
| H | 6.848196  | -0.866453 | -2.524520 | H | 1.765943   | -0.851256 | 0.977919  |
| H | -3.514318 | -5.241169 | 2.964986  | H | -3.452869  | 6.537604  | -1.018748 |
| H | -2.640948 | -4.332859 | 7.077464  | H | -3.121237  | 6.923879  | 2.970456  |
| H | -1.757864 | -3.649329 | 2.238650  | H | -3.422592  | 4.744860  | 4.231237  |
| H | -0.874748 | -2.745378 | 6.342850  | H | -8.429937  | -0.558546 | -3.265440 |
| H | -0.134231 | -2.167372 | 2.898245  | H | -1.479467  | -3.834011 | -7.098091 |
| H | -0.164151 | -5.970695 | 7.932330  | H | 2.270721   | 3.843372  | 3.975104  |
| H | 2.207552  | -6.024630 | 5.985981  | H | -4.185807  | 3.473531  | 6.288790  |
| H | 0.733110  | -5.054283 | 5.779884  | O | 1.584359   | 5.176315  | 2.631345  |
| H | 0.718364  | -8.169479 | 5.960434  | H | 0.790833   | 5.747573  | 2.479238  |
| H | -8.935011 | -2.996702 | -3.759594 | H | -9.076997  | -3.311867 | -2.038573 |
| H | -6.552697 | -2.314167 | -3.438517 | C | -6.766614  | -4.426477 | -3.129660 |
| H | -8.683437 | -0.871377 | -1.544421 | H | -5.692391  | -4.640332 | -3.126638 |
| H | 2.510775  | -7.928512 | -0.297642 | H | -7.246158  | -5.131481 | -2.438883 |
| H | 2.210177  | -6.081671 | 3.571562  | H | -7.150299  | -4.634979 | -4.134957 |

C -6.453472 -2.685783 -1.326895  
H -6.588076 -1.641588 -1.029286  
H -6.924371 -3.315338 -0.561219  
H -5.378088 -2.891661 -1.312021  
H 1.279695 -6.958908 8.123944  
S 2.120493 -4.168547 7.541535  
C 2.738071 -3.070447 6.214285  
H 1.920948 -2.749778 5.563046  
H 3.175716 -2.195654 6.699888  
H 3.509507 -3.570344 5.622973  
H -5.199266 0.998329 0.046835

**TS1-S-SO-C2-r1**

C 3.219608 0.461812 -5.847406  
C 2.500295 -0.884215 -5.803067  
O 2.438702 -1.608325 -6.802528  
N 1.923757 -1.223279 -4.612566  
C 1.169767 -2.465227 -4.468892  
C -0.344581 -2.185881 -4.527466  
O -0.829836 -1.259117 -3.855663  
C 1.536222 -3.183553 -3.144071  
C 0.991916 -4.593776 -3.060140  
C 1.739589 -5.672597 -3.555677  
C -0.274488 -4.854702 -2.517588  
C 1.235264 -6.974456 -3.519697  
C -0.784848 -6.153727 -2.484138  
C -0.032625 -7.218464 -2.986650  
N -1.126512 -2.972251 -5.299811  
C -0.735694 -4.143086 -6.122701  
C -2.082646 -4.787099 -6.477204  
C -3.045437 -3.591341 -6.538739  
C -2.574405 -2.701306 -5.382691  
C 3.431404 3.472199 -2.386700  
C 4.785883 2.748498 -2.449783  
O 5.829114 3.405441 -2.553177  
C 2.138277 2.671492 -2.664163  
C 1.842381 1.497469 -1.704972  
O 1.334345 1.781989 -0.575068  
O 2.146697 0.325126 -2.081480  
N 4.791992 1.394437 -2.351132  
C 6.037197 0.634904 -2.366599  
C 5.811185 -0.865125 -2.651083  
C 5.670329 -1.724126 -1.426921  
C 4.517333 -2.055389 -0.754844  
C 6.751822 -2.348538 -0.704912  
C 6.174502 -3.049767 0.392924  
C 8.147535 -2.394358 -0.879387  
N 4.814969 -2.847087 0.336849  
C 6.948399 -3.786767 1.298072  
C 8.919284 -3.121799 0.019244  
C 8.324469 -3.811767 1.097623  
C -2.489201 -5.118097 5.082101  
C -2.067598 -4.967568 3.757861  
C -2.213287 -4.097608 5.998313  
C -1.375854 -3.826352 3.346130  
C -1.524141 -2.952215 5.602406  
C -1.094439 -2.808773 4.272529  
O -0.403857 -1.683960 3.954319  
C 1.059400 -6.991201 6.895399  
C 1.407663 -5.720203 7.679175  
C 1.810890 -4.571000 6.752743  
C -8.254683 -3.034501 -3.117401  
C -7.030189 -3.760309 -2.548600

C -6.087955 -2.880673 -1.703685  
C 3.754501 -6.117001 2.271101  
C 3.343615 -4.928242 2.878005  
C 3.166071 -6.500664 1.061134  
C 2.367007 -4.120067 2.286091  
C 2.193103 -5.708950 0.458462  
C 1.787418 -4.504360 1.061653  
O 0.849060 -3.765274 0.434904  
C -5.126600 7.382900 2.166499  
C -3.875206 7.750122 1.365246  
C -2.710687 6.782153 1.619124  
O -2.990127 5.533515 1.611599  
O -1.574264 7.272319 1.827214  
C -4.744200 4.628899 4.799901  
C -3.298663 4.740248 5.322114  
O -3.048648 4.617633 6.528504  
C -5.629500 3.736701 5.676999  
N -2.348969 5.014818 4.390790  
C -0.945000 5.237300 4.750299  
C 0.095053 4.736101 3.723743  
C -0.269539 3.382370 3.104373  
C -4.569700 4.744898 -1.327600  
C -3.222248 4.198626 -1.641832  
C -2.698244 3.598441 -2.761671  
N -2.199360 4.194408 -0.718006  
C -1.125044 3.600232 -1.295240  
N -1.388217 3.224661 -2.539544  
O -0.302242 1.561530 -4.669097  
O 0.331226 -1.421673 1.389629  
H 3.695804 0.715978 -4.898007  
H 2.482190 1.240151 -6.071540  
H 2.628670 -3.203786 -3.082269  
H 1.174569 -2.583818 -2.303927  
H 2.728298 -5.489053 -3.969286  
H -0.855777 -4.036390 -2.104244  
H 1.833051 -7.796059 -3.904329  
H -1.766603 -6.334926 -2.055681  
H -0.427589 -8.229879 -2.955480  
H 1.469762 -3.087657 -5.312971  
H -2.031734 -5.354881 -7.409689  
H -2.383611 -5.472983 -5.677806  
H -2.929097 -3.062327 -7.491167  
H -4.095444 -3.877397 -6.438496  
H -2.745395 -1.634880 -5.545787  
H -3.057838 -2.972220 -4.435463  
H -0.085377 -4.816903 -5.563908  
H 2.142378 2.276090 -3.681046  
H 1.302044 3.371328 -2.604209  
H 3.374451 3.922253 -1.386995  
H 6.667126 -1.226244 -3.232784  
H 4.937394 -0.979975 -3.302373  
H 3.497597 -1.769962 -0.973472  
H 8.617809 -1.866966 -1.705272  
H 9.997654 -3.161730 -0.107039  
H 6.485936 -4.322778 2.121187  
H 8.952735 -4.373712 1.783030  
H 6.573655 0.757104 -1.416427  
H -2.274654 -5.748019 3.030417  
H -2.537810 -4.190883 7.031299  
H -1.041642 -3.726147 2.318149  
H -1.307484 -2.156989 6.308921  
H -0.216008 -1.615447 2.979658  
H 0.545055 -5.412728 8.282795

H 2.690163 -4.847851 6.160732  
H 0.994871 -4.332785 6.063423  
H 1.909256 -7.332943 6.294372  
H -6.453854 -4.186163 -3.381018  
H -5.801530 -2.015585 -2.321365  
H -8.916674 -2.665742 -2.327409  
H 3.473748 -7.424135 0.577900  
H 3.785532 -4.617839 3.820888  
H 1.739820 -5.995056 -0.484422  
H 2.042294 -3.202539 2.767701  
H 0.728991 -2.859361 0.865343  
H -4.105564 7.721388 0.291281  
H -3.541286 8.766898 1.592988  
H -5.429474 6.356623 1.948895  
H -5.587418 4.066367 6.717643  
H -6.669052 3.771735 5.337308  
H -5.152935 5.647483 4.784924  
H 0.541320 3.058502 2.445024  
H -0.423925 2.616470 3.873327  
H -1.182257 3.457792 2.507793  
H -0.792825 4.727609 5.705578  
H -5.242491 4.597269 -2.176835  
H -5.009992 4.249849 -0.455170  
H -3.189364 3.408471 -3.706705  
H -0.195318 3.417452 -0.775363  
H -0.576221 2.129979 -3.916741  
H -5.962141 8.051761 1.931615  
H -8.845568 -3.701079 -3.754795  
H 3.961367 0.435258 -6.646237  
H 6.678653 1.073550 -3.138659  
H 3.502678 4.304841 -3.092098  
H 4.514377 -6.737223 2.736100  
H 0.779895 -7.804672 7.572811  
H -0.754293 6.306149 4.918495  
H -3.028438 -6.007937 5.391878  
H -2.279834 4.604508 0.225386  
H -0.395688 0.657580 -4.327036  
H 0.218441 -6.815046 6.216215  
H -2.623461 5.125118 3.409611  
H 1.945009 -0.572439 -3.822192  
H 3.913413 0.881065 -2.274009  
H 4.134740 -3.240541 0.974377  
C -0.160800 -0.673900 0.272678  
C 1.019177 0.098674 0.672504  
H 0.938055 0.792505 1.495394  
H -0.034099 -1.196337 -0.680059  
C -1.556687 -0.124625 0.394306  
C -2.064332 0.325391 1.620766  
C -2.378192 -0.088022 -0.739676  
C -3.367796 0.813875 1.708147  
H -1.449266 0.274405 2.513004  
C -3.682651 0.404292 -0.651800  
H -1.993877 -0.442950 -1.692997  
C -4.180789 0.856108 0.572053  
H -3.750071 1.159379 2.664360  
H -4.306678 0.436955 -1.539923  
H 1.986440 -0.240478 0.344777  
H -4.539209 5.817074 -1.104680  
H -4.936427 7.455258 3.242609  
H -4.738807 4.291009 3.758512  
H -7.954853 -2.173651 -3.726420  
H -0.202414 -3.806684 -7.020620  
H 1.020616 4.600699 4.302824

H -5.297104 2.693921 5.645539  
O 0.422595 5.695253 2.733280  
H -0.389805 6.132590 2.372343  
H -7.359220 -4.615088 -1.939618  
C -4.804025 -3.644736 -1.348654  
H -4.296297 -4.011587 -2.248256  
H -4.101349 -3.006003 -0.803957  
H -5.026947 -4.513080 -0.715702  
C -6.763581 -2.346663 -0.431907  
H -7.652578 -1.749163 -0.656987  
H -7.072817 -3.173485 0.220342  
H -6.075639 -1.712446 0.136618  
H 2.223808 -5.929078 8.381988  
S 2.206196 -3.055739 7.718896  
C 2.558300 -1.888588 6.354673  
H 1.690632 -1.773884 5.700262  
H 2.790625 -0.924671 6.812355  
H 3.422041 -2.220280 5.772694  
H -5.195343 1.238044 0.641491

**Int1-S-SO-C2-r1**

C 3.017079 0.337686 -5.974087  
C 2.278778 -0.997743 -5.937870  
O 2.221361 -1.731693 -6.927919  
N 1.681142 -1.317622 -4.750211  
C 0.863431 -2.516898 -4.602227  
C -0.630513 -2.141900 -4.641371  
O -1.046681 -1.181592 -3.968832  
C 1.205533 -3.276000 -3.293676  
C 0.580701 -4.653681 -3.229619  
C 1.218850 -5.751366 -3.826629  
C -0.654814 -4.860237 -2.600950  
C 0.634431 -7.019417 -3.807613  
C -1.245426 -6.125288 -2.585209  
C -0.604465 -7.208731 -3.190609  
N -1.471867 -2.877211 -5.398123  
C -1.166604 -4.061395 -6.237686  
C -2.555374 -4.629654 -6.557354  
C -3.452328 -3.382583 -6.593786  
C -2.903359 -2.520578 -5.450937  
C 3.470803 3.253596 -2.456199  
C 4.771772 2.455414 -2.621864  
O 5.830612 3.060582 -2.815098  
C 2.087816 2.553210 -2.574375  
C 1.818053 1.337709 -1.696936  
O 1.356023 1.605471 -0.474827  
O 2.028931 0.186214 -2.077643  
N 4.727455 1.106567 -2.487948  
C 5.932997 0.293003 -2.571000  
C 5.636790 -1.213615 -2.487457  
C 5.435638 -1.756370 -1.101448  
C 4.271720 -2.236600 -0.547545  
C 6.458170 -1.929090 -0.096923  
C 5.832246 -2.521082 1.038980  
C 7.839346 -1.662386 -0.045442  
N 4.500627 -2.684214 0.736419  
C 6.545076 -2.844741 2.200101  
C 8.549391 -1.981364 1.106709  
C 7.907675 -2.566602 2.219125  
C -2.662299 -5.207698 4.988299  
C -2.156355 -5.094868 3.688309  
C -2.437435 -4.160821 5.888691  
C -1.432437 -3.969525 3.284053

|   |           |           |           |   |           |           |           |
|---|-----------|-----------|-----------|---|-----------|-----------|-----------|
| C | -1.718632 | -3.030415 | 5.501612  | H | 8.488328  | -2.805576 | 3.105639  |
| C | -1.205323 | -2.926016 | 4.197164  | H | 6.629097  | 0.587371  | -1.776798 |
| O | -0.489794 | -1.812203 | 3.897119  | H | -2.320623 | -5.896366 | 2.972623  |
| C | 0.837298  | -7.292800 | 6.659903  | H | -2.824549 | -4.221346 | 6.902527  |
| C | 1.211351  | -6.066125 | 7.500804  | H | -1.028358 | -3.900114 | 2.277109  |
| C | 1.585574  | -4.868768 | 6.624465  | H | -1.541698 | -2.215508 | 6.196905  |
| C | -8.537704 | -2.657299 | -2.998703 | H | -0.222916 | -1.755053 | 2.939958  |
| C | -7.331603 | -3.449131 | -2.480933 | H | 0.369259  | -5.792806 | 8.148383  |
| C | -6.275763 | -2.612385 | -1.732266 | H | 2.442081  | -5.115401 | 5.987788  |
| C | 3.446102  | -6.444701 | 1.981497  | H | 0.747468  | -4.591068 | 5.977991  |
| C | 3.052047  | -5.323365 | 2.716698  | H | 1.668054  | -7.600340 | 6.015490  |
| C | 2.895180  | -6.629887 | 0.706267  | H | -6.843636 | -3.944171 | -3.331443 |
| C | 2.138467  | -4.400193 | 2.199005  | H | -5.974292 | -1.788634 | -2.397763 |
| C | 1.985812  | -5.723389 | 0.174482  | H | -9.118443 | -2.213500 | -2.183856 |
| C | 1.570836  | -4.566097 | 0.898264  | H | 3.185989  | -7.497056 | 0.115668  |
| O | 0.716382  | -3.721070 | 0.379903  | H | 3.461561  | -5.159266 | 3.711855  |
| C | -4.757496 | 7.470796  | 2.419799  | H | 1.568845  | -5.874447 | -0.816282 |
| C | -3.709267 | 8.067144  | 1.481728  | H | 1.827948  | -3.545289 | 2.794724  |
| C | -2.318909 | 7.403019  | 1.520865  | H | 0.610577  | -2.460516 | 0.988820  |
| O | -2.286974 | 6.139285  | 1.824179  | H | -4.061188 | 7.992793  | 0.442344  |
| O | -1.333603 | 8.090370  | 1.220135  | H | -3.568348 | 9.135924  | 1.673592  |
| C | -4.440297 | 4.641499  | 4.981101  | H | -4.891254 | 6.404875  | 2.220957  |
| C | -2.968684 | 4.589575  | 5.430418  | H | -5.220450 | 3.955800  | 6.887454  |
| O | -2.662217 | 4.178534  | 6.556131  | H | -6.372838 | 3.815570  | 5.541079  |
| C | -5.321199 | 3.715300  | 5.827098  | H | -4.781765 | 5.679903  | 5.079079  |
| N | -2.050659 | 5.027893  | 4.531217  | H | 0.632963  | 3.038491  | 2.283391  |
| C | -0.618506 | 5.065006  | 4.837707  | H | -0.010207 | 2.507154  | 3.853797  |
| C | 0.280642  | 4.662428  | 3.656288  | H | -1.078131 | 3.275788  | 2.667465  |
| C | -0.067633 | 3.286389  | 3.085292  | H | -0.459001 | 4.389370  | 5.681478  |
| C | -4.426204 | 4.890005  | -1.144901 | H | -5.078233 | 4.628081  | -1.982161 |
| C | -3.046152 | 4.394520  | -1.399302 | H | -4.853541 | 4.449072  | -0.236562 |
| C | -2.503401 | 3.679164  | -2.439756 | H | -2.996009 | 3.335218  | -3.339121 |
| N | -2.012213 | 4.570872  | -0.503571 | H | 0.030796  | 3.942635  | -0.505343 |
| C | -0.915807 | 3.966085  | -1.024596 | H | -0.541754 | 2.171624  | -3.628783 |
| N | -1.171369 | 3.410300  | -2.200464 | H | -5.726037 | 7.969558  | 2.301339  |
| O | -0.337555 | 1.633928  | -4.421358 | H | -9.214966 | -3.301951 | -3.569246 |
| O | 0.496816  | -1.486559 | 1.407023  | H | 3.644206  | 0.367174  | -6.864815 |
| H | 3.628329  | 0.493089  | -5.081199 | H | 6.438560  | 0.514940  | -3.519085 |
| H | 2.282218  | 1.148925  | -6.020302 | H | 3.502885  | 4.052200  | -3.201144 |
| H | 2.296182  | -3.360714 | -3.251413 | H | 4.159355  | -7.154774 | 2.389464  |
| H | 0.888664  | -2.681579 | -2.431993 | H | 0.576682  | -8.142212 | 7.299773  |
| H | 2.184806  | -5.610687 | -4.305908 | H | -0.323614 | 6.073703  | 5.158990  |
| H | -1.144125 | -4.029103 | -2.103047 | H | -3.223977 | -6.086795 | 5.288716  |
| H | 1.147632  | -7.857756 | -4.270388 | H | -2.063637 | 5.105418  | 0.381978  |
| H | -2.201327 | -6.266069 | -2.088633 | H | -0.560984 | 0.719981  | -4.176861 |
| H | -1.060952 | -8.194227 | -3.171928 | H | -0.022758 | -7.079208 | 6.016235  |
| H | 1.116613  | -3.143945 | -5.458079 | H | -2.353106 | 5.419954  | 3.636116  |
| H | -2.560191 | -5.197303 | -7.491235 | H | 1.686881  | -0.648898 | -3.985144 |
| H | -2.872061 | -5.299484 | -5.750574 | H | 3.843614  | 0.623224  | -2.385741 |
| H | -3.332440 | -2.860029 | -7.549345 | H | 3.814470  | -3.172151 | 1.305434  |
| H | -4.513354 | -3.610671 | -6.465644 | C | 0.237868  | -0.567264 | 0.351197  |
| H | -3.014940 | -1.446139 | -5.613316 | C | 1.337074  | 0.508721  | 0.500891  |
| H | -3.378625 | -2.760855 | -4.491822 | H | 1.227744  | 1.018281  | 1.458089  |
| H | -0.538393 | -4.772804 | -5.701630 | H | 0.389839  | -1.066896 | -0.610625 |
| H | 1.915208  | 2.214760  | -3.596653 | C | -1.189046 | -0.044356 | 0.389501  |
| H | 1.322785  | 3.301981  | -2.366057 | C | -1.758614 | 0.413994  | 1.586471  |
| H | 3.550077  | 3.745287  | -1.478834 | C | -1.974696 | -0.060247 | -0.769166 |
| H | 6.489297  | -1.727559 | -2.950176 | C | -3.081868 | 0.853323  | 1.621442  |
| H | 4.769001  | -1.448314 | -3.115913 | H | -1.174245 | 0.401615  | 2.500593  |
| H | 3.279135  | -2.294300 | -0.970618 | C | -3.300742 | 0.381292  | -0.735970 |
| H | 8.348465  | -1.215532 | -0.895313 | H | -1.553076 | -0.425448 | -1.702293 |
| H | 9.615623  | -1.778163 | 1.154451  | C | -3.858241 | 0.839895  | 0.458792  |
| H | 6.049447  | -3.301515 | 3.051513  | H | -3.509238 | 1.201800  | 2.557602  |

H -3.894934 0.366639 -1.645181  
H 2.305219 0.006634 0.460327  
H -4.458736 5.979066 -1.023710  
H -4.454831 7.575733 3.467198  
H -4.509760 4.396582 3.915718  
H -8.219918 -1.842957 -3.660352  
H -0.642503 -3.747114 -7.149025  
H -5.030887 2.668370 5.696773  
H 1.298598 4.616228 4.068793  
O 0.336392 5.654752 2.642918  
H -0.569699 5.819109 2.286466  
H 2.050054 -6.312150 8.163920  
S 2.025074 -3.408226 7.653963  
C 2.387246 -2.189524 6.337924  
H 2.644794 -1.251499 6.834350  
H 3.237281 -2.514343 5.732461  
H 1.516502 -2.029029 5.697582  
H -7.678500 -4.256472 -1.819516  
C -6.825494 -1.994528 -0.437830  
H -6.055817 -1.402375 0.067932  
H -7.679707 -1.336226 -0.624935  
H -7.153072 -2.778577 0.256831  
C -5.025376 -3.453078 -1.435275  
H -4.602652 -3.879025 -2.352580  
H -4.247951 -2.849468 -0.955682  
H -5.263844 -4.286144 -0.762036  
H -4.888763 1.182888 0.486238

**TS2-S-SO-C2-r1**

C 3.113108 -0.028211 -5.911597  
C 2.220314 -1.268005 -5.822170  
O 1.967570 -1.939717 -6.829155  
N 1.739638 -1.575425 -4.585735  
C 0.923780 -2.765006 -4.365987  
C -0.574200 -2.424870 -4.371983  
O -0.999626 -1.458347 -3.710933  
C 1.317146 -3.479395 -3.044921  
C 0.755348 -4.882233 -2.947597  
C 1.430711 -5.959589 -3.540899  
C -0.459496 -5.133793 -2.295303  
C 0.901190 -7.250497 -3.498831  
C -0.995754 -6.422985 -2.256403  
C -0.319461 -7.485182 -2.860994  
N -1.415341 -3.206384 -5.085391  
C -1.100438 -4.407178 -5.910402  
C -2.484179 -4.998814 -6.206783  
C -3.402825 -3.767963 -6.242508  
C -2.856641 -2.890359 -5.110918  
C 3.551601 3.125100 -2.602797  
C 4.869999 2.333540 -2.684587  
O 5.930784 2.937193 -2.897465  
C 2.205584 2.444132 -2.983514  
C 1.674087 1.194802 -2.216067  
O 1.271872 1.559914 -0.916669  
O 2.257153 0.063398 -2.342631  
N 4.810306 0.999407 -2.460693  
C 5.992900 0.147500 -2.482200  
C 5.684826 -1.301430 -2.926726  
C 5.474087 -2.280441 -1.805219  
C 4.338355 -2.467646 -1.049504  
C 6.457754 -3.196909 -1.284345  
C 5.840281 -3.914116 -0.217763  
C 7.794241 -3.492163 -1.613548

N 4.552509 -3.446273 -0.101267  
C 6.516446 -4.904743 0.506044  
C 8.469790 -4.471055 -0.894092  
C 7.835644 -5.171037 0.155572  
C -2.720999 -4.750199 5.351098  
C -2.193058 -4.805150 4.055394  
C -2.509628 -3.592689 6.108704  
C -1.464170 -3.740060 3.516054  
C -1.786519 -2.520364 5.586667  
C -1.254939 -2.584457 4.286521  
O -0.545606 -1.508594 3.856220  
C 0.745500 -6.735599 7.203200  
C 1.394199 -5.461845 7.758447  
C 1.591810 -4.398922 6.674784  
C -8.493250 -2.729818 -2.859308  
C -7.699031 -4.002718 -2.545921  
C -6.252341 -3.765610 -2.068635  
C 3.409196 -6.236292 2.505695  
C 3.309341 -4.889520 2.870187  
C 2.530293 -6.725656 1.527537  
C 2.366758 -4.045137 2.276737  
C 1.583089 -5.902738 0.931058  
C 1.456827 -4.522530 1.281452  
O 0.554239 -3.763937 0.722067  
C -4.695803 7.729500 1.874401  
C -3.222016 8.152315 1.801247  
C -2.489042 7.227937 0.828608  
O -2.163778 6.065090 1.317047  
O -2.318939 7.574057 -0.348835  
C -4.426199 5.085499 4.631701  
C -2.960110 5.084581 5.100882  
O -2.676643 4.875209 6.286309  
C -5.307700 4.168400 5.488600  
N -2.019085 5.344039 4.154512  
C -0.600000 5.472598 4.500599  
C 0.370814 5.041277 3.391144  
C 0.132459 3.611439 2.903203  
C -4.346397 4.901904 -1.496103  
C -3.067031 4.152338 -1.626498  
C -2.644180 3.186220 -2.505721  
N -2.020802 4.342042 -0.747776  
C -1.025720 3.511531 -1.095493  
N -1.368338 2.792610 -2.159968  
O 0.194608 1.082594 -3.060389  
O 0.628297 -1.331331 1.334728  
H 3.417277 0.351883 -4.936178  
H 2.573471 0.757447 -6.450045  
H 2.410378 -3.514143 -3.015375  
H 0.988229 -2.883645 -2.188629  
H 2.382327 -5.783875 -4.036972  
H -0.970259 -4.320069 -1.790658  
H 1.442871 -8.071818 -3.959700  
H -1.937122 -6.598401 -1.743069  
H -0.734025 -8.488639 -2.825735  
H 1.146840 -3.429362 -5.202941  
H -2.491063 -5.574600 -7.135701  
H -2.780629 -5.666964 -5.390951  
H -3.301041 -3.249180 -7.202256  
H -4.458447 -4.013505 -6.102152  
H -3.000493 -1.819617 -5.271244  
H -3.309528 -3.144414 -4.144021  
H -0.457898 -5.099032 -5.366221  
H 2.241898 2.142564 -4.032810

H 1.435144 3.217518 -2.914184  
H 3.487633 3.509416 -1.575973  
H 6.525879 -1.651717 -3.535360  
H 4.817209 -1.289048 -3.595232  
H 3.384746 -1.962689 -1.118889  
H 8.294178 -2.960578 -2.419430  
H 9.502041 -4.704070 -1.141089  
H 6.018091 -5.445244 1.305101  
H 8.387988 -5.933136 0.698485  
H 6.476035 0.131707 -1.495600  
H -2.343487 -5.694455 3.448451  
H -2.910876 -3.519914 7.116299  
H -1.044844 -3.800708 2.513645  
H -1.622626 -1.620307 6.171499  
H -0.244878 -1.564919 2.914425  
H 0.769058 -5.050686 8.560836  
H 2.236135 -4.778502 5.874563  
H 0.631172 -4.117049 6.232849  
H 1.366148 -7.186961 6.421441  
H -7.669444 -4.631539 -3.446070  
H -5.750804 -3.148500 -2.830403  
H -8.634495 -2.106113 -1.971241  
H 2.589689 -7.770394 1.226937  
H 3.982305 -4.483753 3.623606  
H 0.909100 -6.292816 0.173621  
H 2.301355 -3.001402 2.573203  
H 0.621121 -2.337369 1.054563  
H -3.140359 9.185075 1.449331  
H -2.764367 8.084233 2.794001  
H -5.173622 7.829399 0.893807  
H -5.212399 4.430210 6.544461  
H -6.357968 4.258312 5.195361  
H -4.787382 6.119809 4.699872  
H 0.890537 3.344131 2.161388  
H 0.189025 2.894839 3.730073  
H -0.852109 3.513437 2.437483  
H -0.435631 4.867808 5.396290  
H -4.993560 4.703489 -2.354053  
H -4.890897 4.611058 -0.589856  
H -3.168910 2.750363 -3.342827  
H -0.084292 3.425329 -0.578761  
H -0.594287 1.837578 -2.641992  
H -5.256889 8.347101 2.584059  
H -9.487066 -2.973289 -3.249983  
H 3.997442 -0.284161 -6.500208  
H 6.707057 0.613499 -3.168731  
H 3.685305 3.995406 -3.249678  
H 4.142470 -6.886940 2.973050  
H 0.605468 -7.481016 7.992952  
H -0.366194 6.513887 4.763968  
H -3.286355 -5.584061 5.755419  
H -2.012070 5.031744 0.050052  
H -0.105548 0.148925 -3.075154  
H -0.234967 -6.518724 6.765590  
H -2.294384 5.591769 3.199400  
H 1.937272 -0.953432 -3.789853  
H 3.891975 0.553968 -2.332940  
H 3.873501 -3.744648 0.593429  
C 0.269908 -0.518630 0.210256  
C 1.364129 0.576005 0.131557  
H 1.343511 1.160797 1.055293  
H 0.330534 -1.115028 -0.707772  
C -1.161900 -0.027626 0.360346

C -1.564547 0.657074 1.516604  
C -2.126964 -0.327554 -0.608455  
C -2.892916 1.043188 1.694023  
H -0.839282 0.864908 2.296283  
C -3.460053 0.055133 -0.432258  
H -1.838811 -0.868403 -1.506092  
C -3.847693 0.743423 0.717874  
H -3.184356 1.571489 2.597788  
H -4.194807 -0.187336 -1.195258  
H 2.324921 0.060993 0.066246  
H -4.159189 5.978906 -1.437137  
H -4.786734 6.686712 2.186534  
H -4.479515 4.806052 3.573984  
H -7.980699 -2.121025 -3.613367  
H -0.587138 -4.097626 -6.828879  
H -8.231593 -4.590004 -1.783730  
C -5.491273 -5.095664 -1.968593  
H -4.449005 -4.935677 -1.671980  
H -5.950986 -5.753600 -1.220485  
H -5.491293 -5.629474 -2.925668  
C -6.190030 -3.007626 -0.734259  
H -6.679628 -2.030662 -0.791553  
H -6.682021 -3.581278 0.061482  
H -5.153259 -2.834939 -0.427587  
H 1.369244 5.090055 3.846754  
O 0.411198 5.968651 2.313565  
H -0.472276 5.980477 1.884912  
H -5.011815 3.120553 5.376901  
H 2.362896 -5.706900 8.211468  
S 2.366037 -2.886860 7.385320  
C 2.529673 -1.859950 5.879315  
H 2.941084 -0.898665 6.194853  
H 3.217459 -2.323054 5.167689  
H 1.560969 -1.696424 5.401192  
H -4.883768 1.039548 0.857201

**Int2-S-SO-C2-r1**

C 3.235388 -0.003700 -5.832196  
C 2.362470 -1.259262 -5.741542  
O 2.118792 -1.932554 -6.751547  
N 1.895787 -1.578432 -4.504763  
C 1.099017 -2.783298 -4.289817  
C -0.404715 -2.476567 -4.349904  
O -0.868344 -1.501844 -3.729422  
C 1.466752 -3.454149 -2.939057  
C 0.926079 -4.862611 -2.811594  
C 1.627987 -5.944808 -3.364444  
C -0.293564 -5.117247 -2.169648  
C 1.119316 -7.242818 -3.294515  
C -0.808918 -6.413822 -2.102520  
C -0.106625 -7.480641 -2.668007  
N -1.208166 -3.295511 -5.067129  
C -0.842392 -4.508873 -5.850036  
C -2.202723 -5.144354 -6.163891  
C -3.150066 -3.938719 -6.259145  
C -2.653955 -3.013469 -5.142170  
C 3.510210 3.208998 -2.563202  
C 4.854639 2.454371 -2.598645  
O 5.904755 3.094403 -2.768044  
C 2.208008 2.496669 -3.011431  
C 1.632885 1.220139 -2.295509  
O 1.252158 1.629578 -0.933623  
O 2.344988 0.115633 -2.335091



|   |           |           |           |   |           |           |           |
|---|-----------|-----------|-----------|---|-----------|-----------|-----------|
| N | 4.822966  | 1.118473  | -2.384082 | H | -2.171124 | -5.746884 | -7.075242 |
| C | 6.037498  | 0.309503  | -2.348602 | H | -2.503496 | -5.796266 | -5.336509 |
| C | 5.838987  | -1.125220 | -2.890680 | H | -3.037379 | -3.446761 | -7.231782 |
| C | 5.568346  | -2.170729 | -1.843075 | H | -4.202645 | -4.206425 | -6.136923 |
| C | 4.438442  | -2.311785 | -1.068323 | H | -2.817286 | -1.951963 | -5.341661 |
| C | 6.477037  | -3.207054 | -1.420166 | H | -3.128738 | -3.245598 | -4.180315 |
| C | 5.824553  | -3.942276 | -0.386695 | H | -0.196565 | -5.168967 | -5.271365 |
| C | 7.773388  | -3.594727 | -1.809048 | H | 2.304048  | 2.207947  | -4.062532 |
| N | 4.586501  | -3.374008 | -0.199821 | H | 1.416767  | 3.254184  | -2.981091 |
| C | 6.428321  | -5.034649 | 0.249479  | H | 3.388437  | 3.566547  | -1.531587 |
| C | 8.376909  | -4.676344 | -1.178091 | H | 6.749975  | -1.409026 | -3.428880 |
| C | 7.709751  | -5.389594 | -0.158171 | H | 5.041324  | -1.110830 | -3.641720 |
| C | -2.683594 | -4.738495 | 5.380594  | H | 3.530391  | -1.723389 | -1.080625 |
| C | -2.134601 | -4.790172 | 4.093511  | H | 8.299139  | -3.054667 | -2.592592 |
| C | -2.503605 | -3.573709 | 6.135360  | H | 9.377926  | -4.980462 | -1.472190 |
| C | -1.416412 | -3.715047 | 3.559452  | H | 5.905601  | -5.580412 | 1.029499  |
| C | -1.791849 | -2.491113 | 5.618634  | H | 8.206019  | -6.231985 | 0.316018  |
| C | -1.240303 | -2.552050 | 4.326713  | H | 6.437378  | 0.257362  | -1.326259 |
| O | -0.546637 | -1.463211 | 3.901287  | H | -2.259293 | -5.685173 | 3.489083  |
| C | 0.802499  | -6.590002 | 7.331900  | H | -2.920859 | -3.503110 | 7.136617  |
| C | 1.451569  | -5.299458 | 7.846038  | H | -0.977891 | -3.773433 | 2.564888  |
| C | 1.651380  | -4.271114 | 6.729910  | H | -1.652327 | -1.585654 | 6.201466  |
| C | -8.344736 | -3.014124 | -2.973649 | H | -0.222059 | -1.519606 | 2.969287  |
| C | -7.173383 | -3.798974 | -2.372205 | H | 0.825522  | -4.862358 | 8.633908  |
| C | -6.159118 | -2.949433 | -1.581533 | H | 2.300571  | -4.672637 | 5.944334  |
| C | 3.545906  | -6.077509 | 2.682005  | H | 0.691838  | -4.005709 | 6.275406  |
| C | 3.503758  | -4.700176 | 2.922553  | H | 1.424071  | -7.068141 | 6.566921  |
| C | 2.590267  | -6.628573 | 1.814036  | H | -6.639407 | -4.313011 | -3.182809 |
| C | 2.543404  | -3.886774 | 2.315267  | H | -5.819553 | -2.139016 | -2.245219 |
| C | 1.624895  | -5.836419 | 1.205337  | H | -8.965399 | -2.547443 | -2.202052 |
| C | 1.555929  | -4.425636 | 1.430440  | H | 2.603462  | -7.698258 | 1.611154  |
| O | 0.637929  | -3.693956 | 0.863456  | H | 4.236159  | -4.246797 | 3.588365  |
| C | -4.963101 | 7.623602  | 1.677201  | H | 0.892222  | -6.275134 | 0.533360  |
| C | -3.495865 | 8.026922  | 1.786040  | H | 2.519487  | -2.818926 | 2.517553  |
| C | -2.521959 | 6.877429  | 1.516340  | H | 0.713520  | -2.230212 | 1.141680  |
| O | -3.048043 | 5.721962  | 1.347499  | H | -3.252396 | 8.843801  | 1.095560  |
| O | -1.291014 | 7.123022  | 1.513771  | H | -3.269423 | 8.414144  | 2.788024  |
| C | -4.670500 | 5.029201  | 4.478902  | H | -5.199102 | 7.269171  | 0.669633  |
| C | -3.248331 | 5.204493  | 5.046144  | H | -5.544183 | 4.531109  | 6.399325  |
| O | -3.066558 | 5.424484  | 6.248928  | H | -6.595959 | 4.165655  | 5.014415  |
| C | -5.562099 | 4.157999  | 5.372299  | H | -5.095218 | 6.039237  | 4.423631  |
| N | -2.239116 | 5.134276  | 4.138789  | H | 0.942803  | 2.709491  | 3.410521  |
| C | -0.855901 | 5.531001  | 4.419000  | H | 0.590865  | 3.189820  | 5.082162  |
| C | 0.157413  | 4.713344  | 3.597527  | H | -0.737761 | 2.778035  | 3.977317  |
| C | 0.242543  | 3.258609  | 4.046644  | H | -0.674652 | 5.403227  | 5.488834  |
| C | -4.458996 | 4.759595  | -1.642599 | H | -5.015996 | 4.484739  | -2.540944 |
| C | -3.149316 | 4.052826  | -1.614789 | H | -5.065023 | 4.501291  | -0.768564 |
| C | -2.574189 | 3.181566  | -2.499244 | H | -2.931703 | 2.801142  | -3.442386 |
| N | -2.258738 | 4.182335  | -0.564111 | H | -0.340476 | 3.300509  | -0.152181 |
| C | -1.195320 | 3.413612  | -0.797135 | H | -0.703772 | 2.076882  | -2.368309 |
| N | -1.360775 | 2.799765  | -1.969079 | H | -5.619702 | 8.473990  | 1.896583  |
| O | 0.353581  | 1.049092  | -3.015521 | H | -8.994377 | -3.668823 | -3.564448 |
| O | 0.717623  | -1.224473 | 1.393184  | H | 4.148699  | -0.259394 | -6.375832 |
| H | 3.489788  | 0.409711  | -4.856463 | H | 6.784591  | 0.840700  | -2.946838 |
| H | 2.704222  | 0.752931  | -6.418368 | H | 3.653017  | 4.097607  | -3.183481 |
| H | 2.559063  | -3.467798 | -2.879398 | H | 4.293032  | -6.704294 | 3.160005  |
| H | 1.106874  | -2.836165 | -2.111669 | H | 0.659798  | -7.308528 | 8.145744  |
| H | 2.584123  | -5.766604 | -3.850814 | H | -0.729184 | 6.595245  | 4.179904  |
| H | -0.825836 | -4.298835 | -1.695871 | H | -3.240252 | -5.580207 | 5.780724  |
| H | 1.681449  | -8.067185 | -3.724486 | H | -2.436193 | 4.786662  | 0.303760  |
| H | -1.754835 | -6.590775 | -1.598214 | H | 0.131319  | 0.096878  | -3.043018 |
| H | -0.505038 | -8.489660 | -2.610950 | H | -0.176705 | -6.386521 | 6.885118  |
| H | 1.362539  | -3.462242 | -5.103349 | H | -2.484919 | 5.053849  | 3.153835  |

H 2.074309 -0.941745 -3.704190  
H 3.896730 0.649356 -2.288804  
H 3.911042 -3.649804 0.507431  
C 0.346876 -0.450848 0.243353  
C 1.402693 0.681784 0.124074  
H 1.375991 1.274467 1.046077  
H 0.429949 -1.071336 -0.656884  
C -1.098303 0.005042 0.368636  
C -1.535377 0.682044 1.517199  
C -2.036190 -0.296458 -0.626378  
C -2.870176 1.058755 1.662395  
H -0.829036 0.894961 2.312695  
C -3.375024 0.081189 -0.484744  
H -1.720371 -0.828714 -1.519967  
C -3.797052 0.760950 0.658986  
H -3.187972 1.584127 2.559036  
H -4.087481 -0.156773 -1.270286  
H 2.378645 0.192616 0.059657  
H -4.329615 5.846857 -1.638973  
H -5.204686 6.817265 2.368996  
H -4.632929 4.646944 3.454960  
H -7.986392 -2.217619 -3.636328  
H -0.313972 -4.211997 -6.764201  
H 1.139569 5.188899 3.769569  
H -5.216162 3.119148 5.385289  
O -0.154393 4.719015 2.208713  
H -0.443449 5.623256 1.929899  
H -7.560342 -4.591338 -1.714933  
C -4.929276 -3.785896 -1.199027  
H -4.178510 -3.174923 -0.687550  
H -5.207379 -4.605862 -0.525115  
H -4.456572 -4.229256 -2.082908  
C -6.779074 -2.307014 -0.331470  
H -7.621049 -1.652115 -0.576939  
H -7.144762 -3.078076 0.358483  
H -6.038111 -1.705560 0.205350  
H 2.419423 -5.530336 8.308264  
S 2.418048 -2.735887 7.397845  
C 2.562508 -1.745250 5.865772  
H 1.587047 -1.589893 5.398876  
H 2.982470 -0.778518 6.151950  
H 3.236227 -2.229174 5.154895  
H -4.837418 1.054130 0.770349

**TS3-S-SO-C2-r1**

C 3.308974 -0.272393 -5.874559  
C 2.431560 -1.520846 -5.758053  
O 2.171963 -2.212502 -6.749184  
N 1.969785 -1.814936 -4.511207  
C 1.104360 -2.963855 -4.273328  
C -0.376562 -2.578297 -4.425966  
O -0.806499 -1.535886 -3.896661  
C 1.368888 -3.561037 -2.865804  
C 0.694097 -4.898657 -2.647660  
C 1.318381 -6.087072 -3.054849  
C -0.572129 -4.980518 -2.051924  
C 0.691149 -7.322888 -2.883866  
C -1.204537 -6.213850 -1.882302  
C -0.576451 -7.389326 -2.300578  
N -1.196293 -3.399147 -5.119180  
C -0.869481 -4.683839 -5.798440  
C -2.249529 -5.257968 -6.144046  
C -3.118361 -4.009077 -6.358574

C -2.618770 -3.043053 -5.278718  
C 3.642720 3.014524 -2.685800  
C 4.958942 2.215855 -2.737366  
O 6.015057 2.792907 -3.034705  
C 2.326756 2.421757 -3.251356  
C 1.647399 1.144364 -2.692003  
O 1.016100 1.729192 -1.104911  
O 2.313457 0.085727 -2.445687  
N 4.910589 0.911032 -2.378951  
C 6.103085 0.065307 -2.386894  
C 5.768545 -1.433147 -2.552997  
C 5.605154 -2.194685 -1.268374  
C 4.449003 -2.429920 -0.559492  
C 6.666883 -2.823758 -0.521693  
C 6.072681 -3.427779 0.624890  
C 8.056171 -2.949096 -0.709497  
N 4.724369 -3.166227 0.573446  
C 6.823912 -4.145612 1.564282  
C 8.805478 -3.656708 0.223663  
C 8.194144 -4.249758 1.349745  
C -2.761001 -4.589905 5.425600  
C -2.180828 -4.662829 4.152719  
C -2.629346 -3.399119 6.149244  
C -1.478939 -3.583815 3.603684  
C -1.935462 -2.312545 5.616604  
C -1.352362 -2.394936 4.339893  
O -0.676339 -1.299228 3.901212  
C 0.674577 -6.469608 7.438809  
C 1.176642 -5.149834 8.036600  
C 1.403153 -4.082821 6.962604  
C -8.347620 -2.949563 -2.995506  
C -7.713393 -4.341806 -2.904943  
C -6.184173 -4.349602 -2.709117  
C 3.447608 -6.135689 2.790308  
C 3.252719 -4.845650 3.297763  
C 2.714240 -6.512393 1.654761  
C 2.366290 -3.948738 2.691559  
C 1.824996 -5.637292 1.042397  
C 1.610221 -4.307259 1.529409  
O 0.775438 -3.499130 0.943081  
C -4.746104 7.723206 1.403307  
C -3.540009 8.537868 1.877697  
C -2.230868 8.009346 1.269029  
O -2.071931 6.728438 1.375246  
O -1.436232 8.794364 0.732762  
C -4.523505 5.194100 4.270388  
C -3.076740 5.177144 4.795697  
O -2.826167 4.952178 5.983494  
C -5.503003 4.497400 5.220311  
N -2.110800 5.425798 3.866794  
C -0.698398 5.608604 4.215800  
C 0.133648 4.322552 4.039745  
C -0.155619 3.248543 5.087073  
C -4.293211 4.766111 -1.841397  
C -2.917223 4.299494 -1.467397  
C -2.153913 3.252880 -1.930237  
N -2.154616 4.900648 -0.480933  
C -0.999257 4.231226 -0.364770  
N -0.965022 3.223815 -1.229742  
O 0.459150 1.009859 -3.384960  
O 0.660883 -0.985027 1.408887  
H 3.622559 0.120056 -4.906774  
H 2.749335 0.500856 -6.410387

|   |           |           |           |   |           |           |           |
|---|-----------|-----------|-----------|---|-----------|-----------|-----------|
| H | 2.453210  | -3.670441 | -2.763625 | H | 4.140092  | -6.824179 | 3.265086  |
| H | 1.041557  | -2.850995 | -2.100860 | H | 0.511160  | -7.217966 | 8.221228  |
| H | 2.307828  | -6.042575 | -3.503787 | H | -0.307114 | 6.373254  | 3.540216  |
| H | -1.054251 | -4.073549 | -1.700406 | H | -3.303790 | -5.434952 | 5.837329  |
| H | 1.194179  | -8.232144 | -3.200903 | H | -2.335122 | 5.724971  | 0.149688  |
| H | -2.181408 | -6.257281 | -1.408862 | H | 0.167615  | 0.074474  | -3.346324 |
| H | -1.065337 | -8.349510 | -2.162928 | H | -0.271949 | -6.324509 | 6.906983  |
| H | 1.367902  | -3.704856 | -5.030702 | H | -2.366487 | 5.812228  | 2.947760  |
| H | -2.210266 | -5.915770 | -7.015986 | H | 2.121615  | -1.150200 | -3.740222 |
| H | -2.628813 | -5.840497 | -5.297482 | H | 3.981133  | 0.486722  | -2.242159 |
| H | -2.935059 | -3.587433 | -7.353209 | H | 4.031465  | -3.475555 | 1.250019  |
| H | -4.189084 | -4.209370 | -6.269886 | C | 0.260463  | -0.304101 | 0.209934  |
| H | -2.710790 | -1.989160 | -5.550252 | C | 1.207965  | 0.916118  | 0.042527  |
| H | -3.146485 | -3.186760 | -4.327184 | H | 1.117083  | 1.553348  | 0.934331  |
| H | -0.296476 | -5.339208 | -5.142168 | H | 0.423108  | -0.957672 | -0.655346 |
| H | 2.475216  | 2.191603  | -4.313548 | C | -1.218686 | 0.044645  | 0.267864  |
| H | 1.575193  | 3.216058  | -3.222584 | C | -1.747225 | 0.728564  | 1.374109  |
| H | 3.480222  | 3.286954  | -1.634161 | C | -2.090866 | -0.347244 | -0.755075 |
| H | 6.583199  | -1.892577 | -3.125546 | C | -3.111007 | 1.009494  | 1.455032  |
| H | 4.871635  | -1.532876 | -3.174159 | H | -1.086686 | 1.030765  | 2.180937  |
| H | 3.436867  | -2.117214 | -0.774239 | C | -3.458584 | -0.066193 | -0.676651 |
| H | 8.539307  | -2.498058 | -1.572561 | H | -1.700538 | -0.876662 | -1.620890 |
| H | 9.878797  | -3.757281 | 0.087017  | C | -3.973772 | 0.610876  | 0.429060  |
| H | 6.345373  | -4.609199 | 2.421466  | H | -3.503623 | 1.533687  | 2.322493  |
| H | 8.804877  | -4.799467 | 2.060647  | H | -4.120459 | -0.382545 | -1.478729 |
| H | 6.685928  | 0.213466  | -1.467879 | H | 2.227124  | 0.513730  | 0.022717  |
| H | -2.267202 | -5.577680 | 3.571875  | H | -4.286663 | 5.804007  | -2.191748 |
| H | -3.070844 | -3.310830 | 7.138586  | H | -4.608895 | 6.665643  | 1.634067  |
| H | -1.013406 | -3.657580 | 2.622730  | H | -4.550657 | 4.740227  | 3.273560  |
| H | -1.833724 | -1.387538 | 6.176021  | H | -7.895663 | -2.361820 | -3.803135 |
| H | -0.341926 | -1.363072 | 2.975337  | H | -0.277606 | -4.482801 | -6.699648 |
| H | 0.450087  | -4.778283 | 8.769993  | H | 1.191428  | 4.605983  | 4.098807  |
| H | 2.148034  | -4.421325 | 6.234691  | O | -0.034980 | 3.797616  | 2.714949  |
| H | 0.473150  | -3.874576 | 6.424639  | H | -0.986580 | 3.646576  | 2.605950  |
| H | 1.396835  | -6.881392 | 6.725454  | H | -5.267960 | 3.433301  | 5.318481  |
| H | -7.948625 | -4.898445 | -3.822236 | H | -8.177938 | -4.904155 | -2.081897 |
| H | -5.743322 | -3.762477 | -3.529953 | C | -5.635552 | -5.780473 | -2.810001 |
| H | -8.226298 | -2.383310 | -2.066910 | H | -5.902656 | -6.244935 | -3.766023 |
| H | 2.843720  | -7.510714 | 1.239408  | H | -4.543654 | -5.795467 | -2.721889 |
| H | 3.805657  | -4.524397 | 4.179252  | H | -6.040870 | -6.411511 | -2.009152 |
| H | 1.265994  | -5.945897 | 0.163686  | C | -5.757098 | -3.700793 | -1.384096 |
| H | 2.223235  | -2.953918 | 3.107442  | H | -6.073634 | -2.655756 | -1.313971 |
| H | 0.762242  | -1.985815 | 1.211520  | H | -6.189403 | -4.238832 | -0.530980 |
| H | -3.651860 | 9.597497  | 1.627682  | H | -4.668026 | -3.720094 | -1.270018 |
| H | -3.458211 | 8.466776  | 2.971320  | H | 2.111904  | -5.322604 | 8.583422  |
| H | -4.875437 | 7.812217  | 0.318046  | C | 2.249512  | -1.493886 | 6.226125  |
| H | -5.451133 | 4.940000  | 6.217580  | H | 1.324246  | -1.387194 | 5.655069  |
| H | -6.528150 | 4.587916  | 4.848802  | H | 2.575536  | -0.508446 | 6.566074  |
| H | -4.813615 | 6.244072  | 4.134769  | H | 3.027950  | -1.923897 | 5.591072  |
| H | 0.455847  | 2.362900  | 4.891370  | S | 1.997022  | -2.514766 | 7.723677  |
| H | 0.067310  | 3.614441  | 6.094362  | H | -5.037100 | 0.824786  | 0.495050  |
| H | -1.209751 | 2.957032  | 5.067745  |   |           |           |           |
| H | -0.619124 | 5.964480  | 5.247657  |   |           |           |           |
| H | -4.692313 | 4.139400  | -2.641827 |   |           |           |           |
| H | -4.978854 | 4.708000  | -0.989151 |   |           |           |           |
| H | -2.375993 | 2.523318  | -2.692700 |   |           |           |           |
| H | -0.241614 | 4.463648  | 0.368670  |   |           |           |           |
| H | -0.056360 | 2.426389  | -1.214724 |   |           |           |           |
| H | -5.676433 | 8.062654  | 1.873124  |   |           |           |           |
| H | -9.421571 | -3.020119 | -3.198263 |   |           |           |           |
| H | 4.186624  | -0.522039 | -6.475622 |   |           |           |           |
| H | 6.737626  | 0.405867  | -3.212274 |   |           |           |           |
| H | 3.848648  | 3.943126  | -3.222524 |   |           |           |           |

**Prod-S-SO-C2-r1**

|   |           |           |          |
|---|-----------|-----------|----------|
| C | -3.093500 | -0.349000 | 5.973600 |
| C | -2.166898 | -1.562778 | 5.867210 |
| O | -1.775103 | -2.164135 | 6.870264 |
| N | -1.777671 | -1.935099 | 4.606557 |
| C | -0.682100 | -2.890900 | 4.426600 |
| C | 0.639094  | -2.207992 | 4.843270 |
| O | 0.825171  | -1.001946 | 4.578601 |
| C | -0.651399 | -3.398204 | 2.964083 |
| C | 0.256836  | -4.591357 | 2.751994 |
| C | -0.195638 | -5.885916 | 3.047944 |

|   |           |           |           |   |           |           |           |
|---|-----------|-----------|-----------|---|-----------|-----------|-----------|
| C | 1.564452  | -4.431976 | 2.275648  | C | 1.922931  | 3.449688  | 1.683417  |
| C | 0.640468  | -6.992479 | 2.886742  | N | 1.591063  | 5.156776  | 0.359014  |
| C | 2.402464  | -5.536574 | 2.110557  | C | 0.501363  | 4.350890  | 0.349685  |
| C | 1.945541  | -6.819791 | 2.418948  | N | 0.660209  | 3.300785  | 1.141655  |
| N | 1.577505  | -2.931088 | 5.485587  | O | -0.670962 | 1.402145  | 4.180694  |
| C | 1.490900  | -4.337600 | 5.965000  | O | -0.202131 | -1.623346 | -1.631282 |
| C | 2.920076  | -4.634458 | 6.434182  | H | -3.732308 | -0.201004 | 5.104094  |
| C | 3.425670  | -3.271085 | 6.929981  | H | -2.474325 | 0.544262  | 6.105285  |
| C | 2.834390  | -2.285239 | 5.915746  | H | -1.679978 | -3.667910 | 2.703143  |
| C | -3.833700 | 2.731700  | 2.650200  | H | -0.353310 | -2.581161 | 2.301491  |
| C | -4.824136 | 1.657931  | 3.119605  | H | -1.213412 | -6.027488 | 3.403664  |
| O | -5.292184 | 1.704049  | 4.262760  | H | 1.921817  | -3.439150 | 2.018210  |
| C | -2.529023 | 2.708193  | 3.470667  | H | 0.270749  | -7.987312 | 3.118602  |
| C | -1.790345 | 1.381759  | 3.448993  | H | 3.408321  | -5.395195 | 1.725544  |
| O | -1.193713 | 1.467699  | 0.028454  | H | 2.596601  | -7.678913 | 2.285506  |
| O | -2.190189 | 0.379478  | 2.872960  | H | -0.881556 | -3.730641 | 5.095462  |
| N | -5.159251 | 0.692869  | 2.217948  | H | 2.943305  | -5.412316 | 7.201478  |
| C | -6.002500 | -0.451100 | 2.565900  | H | 3.523168  | -4.975964 | 5.586093  |
| C | -5.280843 | -1.814255 | 2.594391  | H | 3.029606  | -3.063175 | 7.930122  |
| C | -5.125517 | -2.473454 | 1.255169  | H | 4.515591  | -3.207478 | 6.979311  |
| C | -3.968300 | -2.659421 | 0.534961  | H | 2.620671  | -1.297956 | 6.330363  |
| C | -6.180401 | -3.081199 | 0.478884  | H | 3.492655  | -2.148210 | 5.049185  |
| C | -5.579154 | -3.615904 | -0.697727 | H | 1.161669  | -5.005383 | 5.170512  |
| C | -7.565789 | -3.245434 | 0.666163  | H | -2.738723 | 2.940317  | 4.520749  |
| N | -4.234439 | -3.333772 | -0.637391 | H | -1.838080 | 3.478474  | 3.112316  |
| C | -6.321058 | -4.297785 | -1.670501 | H | -3.595069 | 2.617889  | 1.588561  |
| C | -8.305339 | -3.919569 | -0.299162 | H | -5.874213 | -2.471444 | 3.245080  |
| C | -7.687925 | -4.440210 | -1.456671 | H | -4.306953 | -1.698933 | 3.078859  |
| C | 3.053800  | -4.608200 | -5.307000 | H | -2.956479 | -2.363891 | 0.773123  |
| C | 2.488854  | -4.613154 | -4.030172 | H | -8.053433 | -2.855277 | 1.555732  |
| C | 2.872521  | -3.490392 | -6.127400 | H | -9.375203 | -4.050861 | -0.162502 |
| C | 1.747680  | -3.526336 | -3.567053 | H | -5.840044 | -4.707380 | -2.553245 |
| C | 2.132625  | -2.396740 | -5.681504 | H | -8.290634 | -4.964581 | -2.192918 |
| C | 1.559586  | -2.408099 | -4.398612 | H | -6.845927 | -0.498826 | 1.867384  |
| O | 0.838931  | -1.323098 | -4.021677 | H | 2.622051  | -5.474557 | -3.380677 |
| C | -0.236500 | -6.904600 | -7.120600 | H | 3.309345  | -3.468424 | -7.122516 |
| C | -0.907405 | -5.690104 | -7.774040 | H | 1.306807  | -3.551285 | -2.575660 |
| C | -1.116619 | -4.547911 | -6.776618 | H | 1.985010  | -1.523901 | -6.310391 |
| C | 8.684600  | -2.031600 | 2.846000  | H | 0.454109  | -1.441125 | -3.101622 |
| C | 8.143882  | -3.283005 | 3.545997  | H | -0.293769 | -5.335255 | -8.611375 |
| C | 6.947640  | -3.955860 | 2.845093  | H | -1.736004 | -4.882668 | -5.937880 |
| C | -2.899600 | -6.612800 | -2.405000 | H | -0.157679 | -4.205829 | -6.375188 |
| C | -2.676752 | -5.370783 | -3.005906 | H | -0.847489 | -7.299980 | -6.301860 |
| C | -2.178497 | -6.933597 | -1.247362 | H | 7.840317  | -3.014053 | 4.566672  |
| C | -1.769228 | -4.456808 | -2.463702 | H | 6.162236  | -3.193969 | 2.725656  |
| C | -1.267146 | -6.041000 | -0.697533 | H | 9.092163  | -2.258848 | 1.855950  |
| C | -1.028262 | -4.759834 | -1.279150 | H | -2.334664 | -7.897847 | -0.766592 |
| O | -0.172930 | -3.931337 | -0.743650 | H | -3.223042 | -5.102376 | -3.908715 |
| C | 3.940400  | 8.019600  | -1.917800 | H | -0.712714 | -6.297725 | 0.200211  |
| C | 2.696323  | 8.792765  | -2.355181 | H | -1.604483 | -3.496289 | -2.944431 |
| C | 1.377869  | 8.208104  | -1.821960 | H | -0.186638 | -2.619274 | -1.264704 |
| O | 1.343332  | 6.910343  | -1.756587 | H | 2.753846  | 9.844755  | -2.057991 |
| O | 0.445600  | 8.967578  | -1.532258 | H | 2.625394  | 8.782187  | -3.452656 |
| C | 3.886000  | 5.344300  | -4.657500 | H | 4.068264  | 8.063571  | -0.829959 |
| C | 2.425184  | 5.099937  | -5.088397 | H | 4.734565  | 4.883264  | -6.602994 |
| O | 2.162171  | 4.639679  | -6.205313 | H | 5.910407  | 4.844925  | -5.270829 |
| C | 4.881800  | 4.604800  | -5.557300 | H | 4.068542  | 6.425867  | -4.697476 |
| N | 1.470554  | 5.431961  | -4.178504 | H | -1.115587 | 3.077653  | -2.163966 |
| C | 0.041700  | 5.391900  | -4.498900 | H | -0.470103 | 2.726537  | -3.782838 |
| C | -0.866160 | 4.829165  | -3.397615 | H | 0.574963  | 3.441749  | -2.542988 |
| C | -0.442251 | 3.433857  | -2.945992 | H | -0.056686 | 4.780899  | -5.399122 |
| C | 3.867400  | 5.193900  | 1.471600  | H | 4.432640  | 4.554893  | 2.154609  |
| C | 2.524084  | 4.592944  | 1.208226  | H | 4.453260  | 5.303361  | 0.551272  |

|                      |           |           |           |   |           |           |           |
|----------------------|-----------|-----------|-----------|---|-----------|-----------|-----------|
| H                    | 2.331864  | 2.722414  | 2.370457  | O | 1.082936  | -1.134004 | -7.166917 |
| H                    | -0.360663 | 4.568158  | -0.265216 | N | 0.780540  | -0.666233 | -4.953102 |
| H                    | -0.421538 | 1.922388  | 0.435806  | C | -0.170199 | -1.758084 | -4.757097 |
| H                    | 4.848055  | 8.432788  | -2.372407 | C | -1.611268 | -1.210487 | -4.720519 |
| H                    | 9.486675  | -1.570313 | 3.431955  | O | -1.880068 | -0.219714 | -4.022199 |
| H                    | -3.708252 | -0.466411 | 6.867433  | C | 0.138127  | -2.532485 | -3.449800 |
| H                    | -6.403187 | -0.222160 | 3.555310  | C | -0.646278 | -3.822598 | -3.333677 |
| H                    | -4.314260 | 3.703846  | 2.790164  | C | -0.140308 | -5.015061 | -3.873292 |
| H                    | -3.611007 | -7.314863 | -2.829908 | C | -1.906540 | -3.852575 | -2.719760 |
| H                    | -0.087350 | -7.709373 | -7.847916 | C | -0.872499 | -6.202986 | -3.805758 |
| H                    | -0.312195 | 6.403002  | -4.746850 | C | -2.643896 | -5.035969 | -2.654170 |
| H                    | 3.632314  | -5.458258 | -5.656993 | C | -2.130067 | -6.215819 | -3.198018 |
| H                    | 1.686446  | 5.960722  | -0.279507 | N | -2.572097 | -1.835801 | -5.436745 |
| H                    | -0.248042 | 0.505551  | 4.199706  | C | -2.454102 | -3.053203 | -6.269201 |
| H                    | 0.741693  | -6.637983 | -6.706014 | C | -3.915507 | -3.447751 | -6.523591 |
| H                    | 1.725650  | 5.923594  | -3.316790 | C | -4.653655 | -2.100088 | -6.528648 |
| H                    | -1.938610 | -1.269643 | 3.851119  | C | -3.950446 | -1.311656 | -5.417893 |
| H                    | -4.607715 | 0.632505  | 1.373203  | C | 3.257087  | 3.659613  | -2.858210 |
| H                    | -3.527939 | -3.663366 | -1.289717 | C | 4.455318  | 2.707120  | -2.997934 |
| C                    | -0.149672 | -0.719236 | -0.538431 | O | 5.597522  | 3.161640  | -3.141489 |
| C                    | -0.796247 | 0.597110  | -1.010743 | C | 1.842128  | 3.097586  | -3.093560 |
| H                    | -0.117373 | 1.082418  | -1.725710 | C | 1.433014  | 2.026633  | -2.059679 |
| H                    | -0.774153 | -1.102016 | 0.281957  | O | 1.209254  | 2.410307  | -0.886979 |
| C                    | 1.266597  | -0.530195 | -0.009576 | O | 1.409127  | 0.807146  | -2.454751 |
| C                    | 1.506976  | -0.426765 | 1.364882  | N | 4.220502  | 1.371900  | -2.920921 |
| C                    | 2.358198  | -0.442214 | -0.887084 | C | 5.307006  | 0.401487  | -3.007495 |
| C                    | 2.803086  | -0.255204 | 1.860249  | C | 4.798613  | -1.044743 | -2.886639 |
| H                    | 0.678143  | -0.485168 | 2.061936  | C | 4.498908  | -1.487508 | -1.481772 |
| C                    | 3.652488  | -0.264125 | -0.397760 | C | 3.349021  | -1.257673 | -0.763090 |
| H                    | 2.190823  | -0.522248 | -1.956333 | C | 5.392830  | -2.202606 | -0.603978 |
| C                    | 3.881952  | -0.174376 | 0.978655  | C | 4.712309  | -2.378275 | 0.636443  |
| H                    | 2.954058  | -0.195139 | 2.933958  | C | 6.695606  | -2.717191 | -0.737626 |
| H                    | 4.485734  | -0.201315 | -1.092707 | N | 3.475543  | -1.789568 | 0.505219  |
| H                    | -1.702649 | 0.317006  | -1.559281 | C | 5.295769  | -3.043986 | 1.720994  |
| H                    | 3.790070  | 6.187957  | 1.928347  | C | 7.278828  | -3.378243 | 0.337660  |
| H                    | 3.864754  | 6.968031  | -2.195903 | C | 6.585104  | -3.539977 | 1.555876  |
| H                    | 4.009176  | 5.050546  | -3.609146 | C | -3.581312 | -3.796171 | 5.033435  |
| H                    | 7.896528  | -1.280787 | 2.715199  | C | -2.772730 | -3.896670 | 3.899084  |
| H                    | 0.776731  | -4.395486 | 6.795845  | C | -4.560550 | -2.798510 | 5.086133  |
| H                    | -1.860299 | 4.746393  | -3.861724 | C | -2.929125 | -3.012696 | 2.830536  |
| H                    | 4.750336  | 3.521412  | -5.482297 | C | -4.722590 | -1.904170 | 4.029481  |
| H                    | 8.951751  | -4.021415 | 3.655302  | C | -3.900615 | -2.002602 | 2.897604  |
| C                    | 6.379221  | -5.083580 | 3.718848  | O | -4.090739 | -1.104169 | 1.890347  |
| H                    | 6.090397  | -4.713528 | 4.709210  | C | -0.310092 | -6.290429 | 6.604359  |
| H                    | 5.494609  | -5.537775 | 3.259755  | C | -0.455238 | -5.535068 | 7.930281  |
| H                    | 7.122119  | -5.877936 | 3.865247  | C | -0.422437 | -4.017234 | 7.735185  |
| C                    | 7.305192  | -4.484459 | 1.448085  | C | -9.428395 | -0.642100 | -2.756195 |
| H                    | 7.644736  | -3.687015 | 0.780392  | C | -8.650443 | -1.937436 | -2.496558 |
| H                    | 8.104478  | -5.234272 | 1.508369  | C | -7.307326 | -1.760683 | -1.758866 |
| H                    | 6.438853  | -4.960582 | 0.976277  | C | 2.174304  | -5.872709 | 1.801704  |
| O                    | -1.040368 | 5.718640  | -2.298221 | C | 1.783967  | -4.750146 | 2.535162  |
| H                    | -0.187939 | 6.169605  | -2.075222 | C | 1.676897  | -6.046177 | 0.507222  |
| H                    | -1.874627 | -5.986305 | -8.198786 | C | 0.911949  | -3.803433 | 1.988749  |
| S                    | -1.950585 | -3.118441 | -7.583718 | C | 0.808572  | -5.112526 | -0.051581 |
| C                    | -2.150957 | -2.002400 | -6.147655 | C | 0.426665  | -3.981001 | 0.684768  |
| H                    | -1.188062 | -1.755401 | -5.694485 | O | -0.426611 | -3.112520 | 0.078670  |
| H                    | -2.615784 | -1.087022 | -6.520373 | C | -4.128500 | 9.000000  | 2.260400  |
| H                    | -2.806752 | -2.451132 | -5.397250 | C | -2.897772 | 9.151651  | 1.363910  |
| H                    | 4.892271  | -0.044663 | 1.357472  | C | -1.914220 | 7.981951  | 1.507681  |
| <b>RC-S-SO-C1-r3</b> |           |           |           | O | -2.423002 | 6.808879  | 1.572439  |
| C                    | 2.272203  | 0.766295  | -6.284900 | O | -0.689502 | 8.246987  | 1.564068  |
| C                    | 1.331906  | -0.432670 | -6.179398 | C | -4.066302 | 6.199100  | 4.871400  |
|                      |           |           |           | C | -2.590624 | 6.112521  | 5.292119  |

|   |           |           |           |   |            |           |           |
|---|-----------|-----------|-----------|---|------------|-----------|-----------|
| O | -2.292402 | 5.912176  | 6.478097  | H | -5.829831  | 4.907218  | 4.843427  |
| C | -4.761300 | 4.837700  | 5.069600  | H | -4.539865  | 6.955957  | 5.505819  |
| N | -1.670386 | 6.234873  | 4.302895  | H | 0.557114   | 3.757171  | 2.092108  |
| C | -0.232099 | 6.117600  | 4.557300  | H | -0.380258  | 3.495977  | 3.576504  |
| C | 0.589843  | 5.449555  | 3.432836  | H | -1.021008  | 4.538706  | 2.290959  |
| C | -0.110139 | 4.235207  | 2.813667  | H | -0.132053  | 5.539354  | 5.480364  |
| C | -4.294500 | 6.335500  | -1.253900 | H | -5.077645  | 6.245359  | -2.011526 |
| C | -3.168026 | 5.414922  | -1.572895 | H | -4.734779  | 6.112354  | -0.276786 |
| C | -2.907407 | 4.610607  | -2.656351 | H | -3.509683  | 4.473906  | -3.544629 |
| N | -2.098299 | 5.229895  | -0.721450 | H | -0.327774  | 3.996340  | -0.860098 |
| C | -1.251936 | 4.342196  | -1.306581 | H | -1.133454  | 2.959009  | -4.033097 |
| N | -1.711776 | 3.943313  | -2.485017 | H | -4.819286  | 9.841235  | 2.132329  |
| O | -1.022202 | 2.452830  | -4.866800 | H | -10.340102 | -0.840301 | -3.329832 |
| O | -1.561616 | -0.726718 | 0.833477  | H | 2.917093   | 0.627030  | -7.153080 |
| H | 2.875043  | 0.905158  | -5.384780 | H | 5.823231   | 0.531466  | -3.967963 |
| H | 1.670920  | 1.670398  | -6.429040 | H | 3.457470   | 4.492408  | -3.539016 |
| H | 1.211365  | -2.747519 | -3.447055 | H | 2.854317   | -6.600600 | 2.233145  |
| H | -0.065685 | -1.880406 | -2.595745 | H | -0.318085  | -7.372707 | 6.768109  |
| H | 0.838484  | -5.011573 | -4.347009 | H | 0.207512   | 7.106759  | 4.744913  |
| H | -2.302422 | -2.943419 | -2.277811 | H | -3.463747  | -4.492774 | 5.857774  |
| H | -0.459628 | -7.116277 | -4.225133 | H | -2.002327  | 5.712870  | 0.185266  |
| H | -3.616147 | -5.037819 | -2.169356 | H | -1.208298  | 1.540578  | -4.589168 |
| H | -2.701008 | -7.138214 | -3.141747 | H | -1.130263  | -6.051131 | 5.919228  |
| H | -0.038086 | -2.421367 | -5.612963 | H | -1.985712  | 6.392605  | 3.340860  |
| H | -4.032382 | -4.013173 | -7.451597 | H | 0.963651   | -0.031948 | -4.166046 |
| H | -4.275527 | -4.071227 | -5.697799 | H | 3.265183   | 1.023814  | -2.819911 |
| H | -4.514687 | -1.597096 | -7.492183 | H | 2.765123   | -1.750777 | 1.219421  |
| H | -5.727784 | -2.196006 | -6.351148 | C | -1.189397  | 0.518691  | 0.165352  |
| H | -3.941152 | -0.231164 | -5.578053 | C | -1.175682  | 0.454338  | 1.630333  |
| H | -4.405134 | -1.495750 | -4.436037 | H | -2.042119  | 0.858745  | 2.151597  |
| H | -1.897283 | -3.833956 | -5.750236 | H | -0.261775  | 0.478972  | -0.397786 |
| H | 1.744808  | 2.695139  | -4.102812 | C | 2.336754   | 0.076815  | 4.072067  |
| H | 1.135003  | 3.927442  | -3.009269 | C | 1.092068   | -0.345583 | 4.547818  |
| H | 3.309757  | 4.071124  | -1.841907 | C | 2.440131   | 0.634142  | 2.795911  |
| H | 5.568343  | -1.699668 | -3.310444 | C | -0.040975  | -0.212231 | 3.745923  |
| H | 3.915890  | -1.164415 | -3.527057 | H | 1.003249   | -0.770710 | 5.543293  |
| H | 2.453893  | -0.726672 | -1.065967 | C | 1.309111   | 0.762266  | 1.983351  |
| H | 7.242668  | -2.598242 | -1.669377 | H | 3.402719   | 0.978238  | 2.429846  |
| H | 8.285135  | -3.776776 | 0.242146  | C | 0.061438   | 0.330984  | 2.455384  |
| H | 4.758040  | -3.170464 | 2.655827  | H | -1.010283  | -0.533733 | 4.117600  |
| H | 7.065686  | -4.060790 | 2.379340  | H | 1.387757   | 1.221730  | 0.999527  |
| H | 6.050573  | 0.606619  | -2.227824 | H | -2.016068  | 1.020522  | -0.330795 |
| H | -2.011910 | -4.669573 | 3.834955  | H | -3.973064  | 7.383261  | -1.227657 |
| H | -5.200525 | -2.711054 | 5.959837  | H | -3.843973  | 8.962579  | 3.317008  |
| H | -2.311159 | -3.107830 | 1.943697  | H | -4.154696  | 6.521864  | 3.831154  |
| H | -5.471022 | -1.118795 | 4.066117  | H | -8.825018  | 0.072314  | -3.328260 |
| H | -3.295389 | -1.086652 | 1.315206  | H | -1.933376  | -2.818317 | -7.206262 |
| H | -1.397640 | -5.819296 | 8.414349  | H | 1.505595   | 5.093629  | 3.927012  |
| H | 0.532404  | -3.708405 | 7.295421  | H | -4.325119  | 4.078066  | 4.413005  |
| H | -1.224583 | -3.698444 | 7.061014  | O | 1.044243   | 6.361111  | 2.447804  |
| H | 0.628691  | -6.035339 | 6.100631  | H | 0.302886   | 6.919790  | 2.103968  |
| H | -8.454930 | -2.430332 | -3.458528 | H | -9.279196  | -2.633725 | -1.922364 |
| H | -6.705277 | -1.040403 | -2.333840 | C | -6.536406  | -3.088673 | -1.720607 |
| H | -9.726915 | -0.150648 | -1.824732 | H | -5.566046  | -2.968824 | -1.226765 |
| H | 1.970710  | -6.914513 | -0.076239 | H | -7.098224  | -3.851009 | -1.166228 |
| H | 2.156770  | -4.603412 | 3.545369  | H | -6.356218  | -3.476376 | -2.729629 |
| H | 0.423806  | -5.233038 | -1.058167 | C | -7.481754  | -1.201164 | -0.338635 |
| H | 0.606939  | -2.936350 | 2.568838  | H | -7.950952  | -0.212485 | -0.340617 |
| H | -0.570044 | -2.284706 | 0.580456  | H | -8.110915  | -1.867746 | 0.265378  |
| H | -3.212815 | 9.196330  | 0.312117  | H | -6.516050  | -1.107730 | 0.169714  |
| H | -2.363633 | 10.083126 | 1.574894  | H | 0.349201   | -5.831031 | 8.614579  |
| H | -4.662586 | 8.077299  | 2.024074  | C | -0.566556  | -1.413190 | 8.784259  |
| H | -4.646878 | 4.500953  | 6.103648  | H | -0.698256  | -0.784693 | 9.667320  |

H 0.400372 -1.185494 8.328538  
H -1.369103 -1.200534 8.073982  
S -0.633314 -3.151480 9.345127  
H 3.219253 -0.018188 4.698144

**TS1-S-SO-C1-r3**

C 2.615300 0.006000 -6.059900  
C 1.683337 -1.197193 -5.952775  
O 1.449602 -1.912054 -6.932918  
N 1.118121 -1.422575 -4.728920  
C 0.172800 -2.518400 -4.532200  
C -1.270015 -1.982360 -4.475033  
O -1.537630 -1.001418 -3.762027  
C 0.509442 -3.307256 -3.241859  
C -0.290395 -4.582394 -3.075728  
C 0.172689 -5.787721 -3.624629  
C -1.514253 -4.586967 -2.392018  
C -0.568354 -6.964758 -3.502687  
C -2.259762 -5.761357 -2.270100  
C -1.790792 -6.953988 -2.826588  
N -2.230815 -2.607414 -5.191507  
C -2.111000 -3.813500 -6.044300  
C -3.571800 -4.212880 -6.293671  
C -4.318067 -2.869909 -6.273707  
C -3.613394 -2.094364 -5.155041  
C 3.600100 2.899300 -2.633200  
C 4.786534 1.938607 -2.808752  
O 5.923732 2.398822 -2.969818  
C 2.159538 2.370451 -2.777092  
C 1.764606 1.282359 -1.756590  
O 1.486650 1.670975 -0.582259  
O 1.788632 0.074366 -2.150525  
N 4.551369 0.601624 -2.743805  
C 5.650100 -0.358800 -2.782500  
C 5.185458 -1.790128 -3.166302  
C 5.147442 -2.779842 -2.033390  
C 4.035732 -3.324094 -1.435294  
C 6.285155 -3.370170 -1.366702  
C 5.778684 -4.256816 -0.371287  
C 7.679196 -3.246708 -1.515829  
N 4.404632 -4.213483 -0.445226  
C 6.620107 -4.996791 0.468212  
C 8.517393 -3.982598 -0.685997  
C 7.992436 -4.846652 0.298709  
C -3.238200 -4.556500 5.258400  
C -2.666644 -4.622466 3.984492  
C -3.413959 -3.300864 5.851720  
C -2.269595 -3.466386 3.310134  
C -3.018515 -2.137764 5.192102  
C -2.434192 -2.207590 3.914089  
O -2.072144 -1.045681 3.323306  
C 0.032900 -7.050700 6.829300  
C 0.672406 -5.833210 7.506594  
C 0.614941 -4.586761 6.619802  
C -9.085300 -1.402400 -2.531200  
C -8.481258 -2.805776 -2.648889  
C -7.070843 -2.959856 -2.046635  
C 2.517400 -6.633000 2.026700  
C 2.580272 -5.315047 2.489250  
C 1.542654 -6.981857 1.086594  
C 1.681831 -4.351906 2.023281  
C 0.637402 -6.034308 0.616818  
C 0.698045 -4.710267 1.084866

O -0.206123 -3.828852 0.608629  
C -3.785400 8.239700 2.485400  
C -2.561494 8.414763 1.584440  
C -1.561604 7.257657 1.715998  
O -2.055519 6.078478 1.787231  
O -0.339779 7.537935 1.755055  
C -3.723200 5.438800 5.096400  
C -2.246263 5.351742 5.512286  
O -1.944329 5.146088 6.696188  
C -4.418200 4.077400 5.294600  
N -1.326235 5.478668 4.522726  
C 0.111000 5.357300 4.782300  
C 0.949249 4.749675 3.635726  
C 0.261320 3.566772 2.945395  
C -3.951500 5.575200 -1.028900  
C -2.811947 4.677794 -1.358737  
C -2.537293 3.882304 -2.445250  
N -1.741633 4.507856 -0.506729  
C -0.881623 3.636272 -1.092963  
N -1.331242 3.233592 -2.273838  
O -0.617516 1.663187 -4.597647  
O -0.238956 -1.375653 1.405927  
H 3.208055 0.161351 -5.155545  
H 2.007568 0.903447 -6.218604  
H 1.575437 -3.547515 -3.292778  
H 0.356008 -2.646404 -2.383908  
H 1.125354 -5.802558 -4.148731  
H -1.875194 -3.668209 -1.940566  
H -0.189711 -7.888439 -3.931313  
H -3.202140 -5.747090 -1.729886  
H -2.369289 -7.868036 -2.727671  
H 0.299395 -3.170737 -5.397217  
H -3.691617 -4.765261 -7.229087  
H -3.922809 -4.850422 -5.474830  
H -4.188009 -2.351397 -7.230185  
H -5.390417 -2.975462 -6.091077  
H -3.613356 -1.011422 -5.297498  
H -4.059359 -2.298537 -4.173313  
H -1.545392 -4.597902 -5.539973  
H 1.983736 1.979454 -3.780524  
H 1.484562 3.219481 -2.643332  
H 3.723296 3.340273 -1.635406  
H 5.864323 -2.168079 -3.940733  
H 4.198270 -1.736352 -3.637339  
H 2.991620 -3.141697 -1.639374  
H 8.096384 -2.583236 -2.268593  
H 9.594601 -3.891652 -0.793001  
H 6.212679 -5.663539 1.222406  
H 8.672330 -5.405895 0.935100  
H 6.167159 -0.382514 -1.814054  
H -2.526364 -5.586131 3.501497  
H -3.861649 -3.223966 6.839232  
H -1.834067 -3.537807 2.319429  
H -3.149931 -1.161808 5.649660  
H -1.491238 -1.187610 2.526106  
H 0.159209 -5.627169 8.453983  
H 1.156660 -4.754297 5.682404  
H -0.422789 -4.342132 6.371659  
H 0.547191 -7.299634 5.894532  
H -8.436647 -3.083871 -3.710513  
H -6.424934 -2.204959 -2.520768  
H -9.247938 -1.111756 -1.488715  
H 1.486406 -8.002215 0.716819

H 3.334007 -5.028657 3.217877  
H -0.123810 -6.293553 -0.111784  
H 1.731131 -3.326086 2.375126  
H -0.103989 -2.917823 1.029040  
H -2.881627 8.462092 0.534219  
H -2.038860 9.352009 1.798735  
H -4.306701 7.310733 2.245445  
H -4.301274 7.739427 6.327916  
H -5.487263 4.148231 5.071404  
H -4.194483 6.195075 5.733257  
H 0.944123 3.132942 2.209530  
H -0.022745 2.791769 3.667244  
H -0.641689 3.894559 2.424665  
H 0.208385 4.736431 5.677816  
H -4.733526 5.484553 -1.787671  
H -4.389201 5.331040 -0.055507  
H -3.136661 3.738742 -3.334350  
H 0.039596 3.299262 -0.636893  
H -0.747840 2.198007 -3.784222  
H -4.489074 9.071506 2.366089  
H -10.053345 -1.348410 -3.040636  
H 3.269988 -0.136516 -6.920046  
H 6.377127 0.015733 -3.508395  
H 3.769176 3.712467 -3.345501  
H 3.218706 -7.376406 2.393329  
H 0.076551 -7.929879 7.480305  
H 0.544359 6.338024 5.021720  
H -3.550007 -5.460114 5.773290  
H -1.652055 4.993228 0.399960  
H -0.840813 0.764041 -4.305166  
H -1.018690 -6.860821 6.589097  
H -1.639089 5.649154 3.562336  
H 1.287120 -0.779464 -3.950767  
H 3.606040 0.258572 -2.562371  
H 3.765470 -4.668785 0.191916  
C 0.066837 -0.789987 0.147560  
C 0.836415 0.133073 0.972894  
H 0.257708 0.921311 1.438121  
H 0.641605 -1.434637 -0.516280  
C 4.703310 -0.543162 2.651094  
C 3.722607 0.132253 3.381476  
C 4.424347 -0.992257 1.356380  
C 2.466975 0.354616 2.818372  
H 3.936416 0.490091 4.384075  
C 3.167293 -0.778553 0.795919  
H 5.188669 -1.502172 0.778485  
C 2.172295 -0.109779 1.525066  
H 1.703417 0.879273 3.384154  
H 2.958299 -1.080646 -0.222734  
H -0.778049 -0.346315 -0.388732  
H -3.646516 6.627368 -0.987029  
H -3.495377 8.199515 3.540375  
H -3.815003 5.763452 4.057000  
H -8.429077 -0.651190 -2.985854  
H -1.598173 -3.560882 -6.980901  
H 1.859354 4.371983 4.123539  
H -3.984318 3.318158 4.636171  
O 1.415458 5.709987 2.705081  
H 0.669429 6.244437 2.333079  
H -9.151619 -3.535937 -2.172235  
C -6.493250 -4.343982 -2.376453  
H -5.471910 -4.449145 -1.994785  
H -7.099693 -5.139257 -1.924888

H -6.466886 -4.519766 -3.457935  
C -7.047585 -2.712924 -0.530836  
H -7.383025 -1.704033 -0.272808  
H -7.699946 -3.426287 -0.011103  
H -6.035884 -2.835446 -0.130014  
H 1.716488 -6.056052 7.759105  
C 1.082638 -1.835323 6.238435  
H 1.437136 -0.898889 6.674061  
H 1.643752 -2.034624 5.322380  
H 0.019279 -1.741118 6.006279  
S 1.361705 -3.143753 7.484985  
H 5.684840 -0.711292 3.084902

**Int1-S-SO-C1-r3**

C 2.550200 -0.189800 -6.092200  
C 1.650444 -1.411677 -5.940907  
O 1.500011 -2.210251 -6.869585  
N 1.021646 -1.556881 -4.735355  
C 0.124900 -2.678200 -4.481200  
C -1.330454 -2.192768 -4.368481  
O -1.609535 -1.233953 -3.628116  
C 0.529077 -3.474593 -3.211411  
C -0.175972 -4.812088 -3.118229  
C 0.310621 -5.920944 -3.827531  
C -1.343218 -4.964370 -2.357721  
C -0.357969 -7.145816 -3.791230  
C -2.018604 -6.186864 -2.324853  
C -1.531063 -7.280256 -3.044117  
N -2.291714 -2.837082 -5.064821  
C -2.161300 -4.024500 -5.944800  
C -3.615746 -4.469427 -6.149643  
C -4.406204 -3.153897 -6.079091  
C -3.689946 -2.374195 -4.970837  
C 3.539800 2.804600 -2.754800  
C 4.709767 1.833719 -2.958210  
O 5.820294 2.291603 -3.242407  
C 2.064662 2.320327 -2.667623  
C 1.729434 1.152195 -1.746393  
O 1.401875 1.511322 -0.506163  
O 1.769351 -0.014142 -2.132882  
N 4.505882 0.508508 -2.746949  
C 5.601400 -0.449000 -2.819900  
C 5.118649 -1.906125 -2.984278  
C 4.922515 -2.666771 -1.703784  
C 3.742729 -2.923957 -1.045004  
C 5.961093 -3.289690 -0.919836  
C 5.327705 -3.908371 0.197781  
C 7.357841 -3.399701 -1.053570  
N 3.977716 -3.668757 0.089826  
C 6.048987 -4.621199 1.163633  
C 8.076919 -4.103868 -0.094324  
C 7.427899 -4.708025 1.004109  
C -3.234300 -4.446200 5.379600  
C -2.624808 -4.556793 4.124861  
C -3.337121 -3.178128 5.962923  
C -2.124117 -3.436700 3.454751  
C -2.841563 -2.049728 5.309588  
C -2.228737 -2.167072 4.048829  
O -1.776417 -1.026548 3.470268  
C 0.053400 -6.882200 7.006400  
C 1.072989 -5.757453 6.791908  
C 0.520558 -4.399607 7.230907  
C -9.128700 -1.538900 -2.470200



|   |           |           |           |   |            |           |           |
|---|-----------|-----------|-----------|---|------------|-----------|-----------|
| C | -8.524051 | -2.944066 | -2.564227 | H | 1.990821   | -5.979464 | 7.350802  |
| C | -7.115015 | -3.089638 | -1.955967 | H | -0.361616  | -4.136928 | 6.638300  |
| C | 2.514500  | -6.593700 | 2.182200  | H | 0.225111   | -4.428502 | 8.286081  |
| C | 2.415849  | -5.321363 | 2.757760  | H | -0.865757  | -6.690876 | 6.442411  |
| C | 1.694753  | -6.888141 | 1.084225  | H | -8.477109  | -3.238725 | -3.621314 |
| C | 1.533465  | -4.360774 | 2.252666  | H | -9.291983  | -1.231223 | -1.432698 |
| C | 0.806528  | -5.948385 | 0.574231  | H | 1.752334   | -7.870414 | 0.618090  |
| C | 0.685688  | -4.640004 | 1.136964  | H | 3.038596   | -5.064560 | 3.612959  |
| O | -0.162739 | -3.775503 | 0.648144  | H | 0.176174   | -6.190602 | -0.275933 |
| C | -3.842600 | 8.262900  | 2.242500  | H | 1.470267   | -3.379727 | 2.715972  |
| C | -2.634304 | 8.633656  | 1.373415  | H | -0.180072  | -2.374176 | 1.049705  |
| C | -1.372348 | 7.798347  | 1.657574  | H | -2.893823  | 8.490432  | 0.314921  |
| O | -1.557377 | 6.513035  | 1.740691  | H | -2.373030  | 9.689102  | 1.496837  |
| O | -0.282574 | 8.370169  | 1.784755  | H | -4.127385  | 7.221090  | 2.076962  |
| C | -3.757900 | 5.538500  | 4.932500  | H | -4.371018  | 4.025785  | 6.362165  |
| C | -2.288721 | 5.422984  | 5.374048  | H | -5.562388  | 4.311005  | 5.073942  |
| O | -2.006141 | 5.107593  | 6.537330  | H | -4.205105  | 6.382644  | 5.470430  |
| C | -4.493500 | 4.236100  | 5.297300  | H | 0.533840   | 2.431251  | 2.941543  |
| N | -1.362880 | 5.651191  | 4.412967  | H | -0.039093  | 2.695206  | 4.596905  |
| C | 0.075100  | 5.462000  | 4.603200  | H | -1.034212  | 3.214044  | 3.222837  |
| C | 0.691423  | 4.486146  | 3.586340  | H | 0.216643   | 5.088689  | 5.620012  |
| C | -0.007259 | 3.124547  | 3.589203  | H | -4.714229  | 5.237445  | -1.991281 |
| C | -4.014500 | 5.497800  | -1.192900 | H | -4.546268  | 5.405696  | -0.238545 |
| C | -2.819636 | 4.611329  | -1.249840 | H | -2.998739  | 3.221184  | -2.962672 |
| C | -2.457548 | 3.598184  | -2.105513 | H | 0.041373   | 3.622620  | -0.101762 |
| N | -1.789365 | 4.699615  | -0.339262 | H | -0.754861  | 1.916938  | -3.210692 |
| C | -0.867395 | 3.760648  | -0.668632 | H | -4.705957  | 8.895580  | 2.009066  |
| N | -1.237380 | 3.068089  | -1.737908 | H | -10.096372 | -1.493580 | -2.981197 |
| O | -0.656631 | 1.438629  | -4.060611 | H | 3.287326   | -0.397286 | -6.868318 |
| O | -0.286500 | -1.348937 | 1.224249  | H | 6.227306   | -0.162727 | -3.671425 |
| H | 3.055329  | 0.077646  | -5.161459 | H | 3.600876   | 3.533946  | -3.566370 |
| H | 1.943778  | 0.666896  | -6.405840 | H | 3.205199   | -7.331895 | 2.578778  |
| H | 1.611665  | -3.627737 | -3.261595 | H | 0.456355   | -7.844559 | 6.674989  |
| H | 0.316879  | -2.874783 | -2.321426 | H | 0.590846   | 6.426733  | 4.514996  |
| H | 1.223477  | -5.822414 | -4.410450 | H | -3.623689  | -5.323817 | 5.886299  |
| H | -1.698362 | -4.132461 | -1.758787 | H | -1.725462  | 5.382082  | 0.437001  |
| H | 0.038132  | -7.994022 | -4.342607 | H | -0.967546  | 0.536589  | -3.868866 |
| H | -2.918810 | -6.287574 | -1.724977 | H | -0.216589  | -6.977861 | 8.064227  |
| H | -2.053499 | -8.232164 | -3.013525 | H | -1.661474  | 5.949569  | 3.480557  |
| H | 0.238929  | -3.327037 | -5.350456 | H | 1.127740   | -0.849645 | -4.013780 |
| H | -3.749694 | -5.009388 | -7.090369 | H | 3.573417   | 0.149721  | -2.578014 |
| H | -3.914916 | -5.133163 | -5.331194 | H | 3.265980   | -3.963173 | 0.752569  |
| H | -4.327088 | -2.614673 | -7.029679 | C | 0.235838   | -0.676759 | 0.098205  |
| H | -5.467303 | -3.299434 | -5.861609 | C | 1.050034   | 0.557898  | 0.566495  |
| H | -3.732884 | -1.289613 | -5.092682 | H | 0.364412   | 1.158889  | 1.169398  |
| H | -4.092779 | -2.611923 | -3.978398 | H | 0.872661   | -1.355013 | -0.468228 |
| H | -1.551885 | -4.797078 | -5.475845 | C | 4.454063   | -0.422022 | 3.063170  |
| H | 1.700943  | 2.010128  | -3.648484 | C | 3.148806   | -0.529312 | 3.548421  |
| H | 1.459488  | 3.175900  | -2.362230 | C | 4.664289   | 0.017795  | 1.756567  |
| H | 3.791609  | 3.353600  | -1.839146 | C | 2.065670   | -0.198497 | 2.734063  |
| H | 5.868649  | -2.428686 | -3.590257 | H | 2.969236   | -0.869319 | 4.564439  |
| H | 4.197388  | -1.915731 | -3.578243 | C | 3.580037   | 0.341282  | 0.937025  |
| H | 2.738615  | -2.622338 | -1.302615 | H | 5.673995   | 0.110769  | 1.367357  |
| H | 7.869910  | -2.940670 | -1.895431 | C | 2.268690   | 0.231851  | 1.411943  |
| H | 9.155726  | -4.192654 | -0.188738 | H | 1.055294   | -0.290394 | 3.115601  |
| H | 5.542676  | -5.092595 | 2.000190  | H | 3.773233   | 0.685067  | -0.071828 |
| H | 8.015952  | -5.253082 | 1.737221  | H | -0.558663  | -0.319296 | -0.574411 |
| H | 6.235656  | -0.364932 | -1.928469 | H | -3.747414  | 6.554472  | -1.314817 |
| H | -2.534453 | -5.531149 | 3.651328  | H | -3.617107  | 8.384800  | 3.307220  |
| H | -3.809349 | -3.062449 | 6.935223  | H | -3.833564  | 5.746590  | 3.862650  |
| H | -1.652011 | -3.547204 | 2.480901  | H | -8.472234  | -0.795100 | -2.936631 |
| H | -2.924040 | -1.063200 | 5.756096  | H | -1.692451  | -3.736869 | -6.894212 |
| H | -1.323998 | -1.180543 | 2.602516  | H | 1.733688   | 4.338434  | 3.904990  |

O 0.762606 5.032998 2.271859  
H -0.026121 5.598769 2.095613  
H -4.089093 3.388631 4.734458  
S 1.779691 -3.074410 7.015831  
C 0.784246 -1.620087 7.501676  
H 0.471251 -1.690321 8.546653  
H 1.417498 -0.739215 7.378348  
H -0.094040 -1.521399 6.859184  
H -9.195808 -3.666554 -2.077992  
C -6.536018 -4.478410 -2.263864  
H -6.505326 -4.669067 -3.342762  
H -5.516648 -4.579856 -1.875789  
H -7.145408 -5.266951 -1.804496  
C -7.095904 -2.820941 -0.443781  
H -7.748789 -3.527576 0.084397  
H -6.085138 -2.936551 -0.038709  
H -7.433202 -1.808842 -0.200945  
H -6.467826 -2.341435 -2.438946  
H 1.352106 -5.709921 5.732842  
H 5.297853 -0.674499 3.698781

**TS2-S-SO-C1-r3**

C 3.054600 -0.831500 -5.710800  
C 2.033628 -1.956320 -5.530077  
O 1.724083 -2.687112 -6.478702  
N 1.503996 -2.096537 -4.284363  
C 0.552200 -3.162400 -3.985400  
C -0.894691 -2.661249 -4.118329  
O -1.233418 -1.581067 -3.600574  
C 0.798700 -3.746237 -2.569597  
C 0.043503 -5.036388 -2.326967  
C 0.590395 -6.266048 -2.724816  
C -1.225764 -5.031808 -1.732104  
C -0.117556 -7.456698 -2.549761  
C -1.937915 -6.220564 -1.557829  
C -1.388614 -7.436861 -1.970581  
N -1.788894 -3.427504 -4.784666  
C -1.580700 -4.751500 -5.436100  
C -3.009587 -5.219347 -5.740270  
C -3.776266 -3.909103 -5.976433  
C -3.180610 -2.961029 -4.929739  
C 3.711600 2.593700 -2.724300  
C 4.941500 1.665523 -2.687813  
O 6.068985 2.157801 -2.828546  
C 2.298565 2.025968 -3.038866  
C 1.654983 0.920027 -2.145935  
O 1.343486 1.491514 -0.895061  
O 2.123220 -0.268698 -2.164057  
N 4.731715 0.346683 -2.441121  
C 5.832300 -0.579600 -2.202900  
C 5.602576 -2.006823 -2.726239  
C 4.877925 -2.951565 -1.804145  
C 4.169154 -2.666758 -0.659706  
C 4.844989 -4.387439 -1.944799  
C 4.098962 -4.903597 -0.844678  
C 5.380038 -5.289676 -2.883155  
N 3.701578 -3.830594 -0.081460  
C 3.881766 -6.275615 -0.666289  
C 5.167164 -6.653046 -2.709539  
C 4.424966 -7.140126 -1.611634  
C -3.567800 -3.747600 5.727000  
C -2.871030 -4.053555 4.552114  
C -3.708283 -2.401364 6.084704

C -2.323526 -3.052686 3.742684  
C -3.167858 -1.390017 5.290577  
C -2.468480 -1.705433 4.112379  
O -1.972756 -0.665382 3.390108  
C -0.379100 -5.857800 7.910600  
C 0.824646 -5.082315 8.456066  
C 1.334929 -4.039856 7.458951  
C -8.853900 -2.044900 -2.873700  
C -8.308712 -3.477172 -2.895606  
C -6.904878 -3.649946 -2.282512  
C 2.462300 -6.119100 3.298600  
C 2.624478 -4.729565 3.310480  
C 1.385318 -6.655430 2.576550  
C 1.741983 -3.888903 2.625745  
C 0.497400 -5.835079 1.890819  
C 0.634237 -4.411634 1.886585  
O -0.217486 -3.659502 1.251994  
C -4.155500 8.430700 0.923100  
C -2.642112 8.692144 0.895320  
C -1.949728 7.577070 0.110037  
O -1.837904 6.449348 0.753705  
O -1.619141 7.753243 -1.069924  
C -4.240100 6.077700 3.943500  
C -2.805006 6.074534 4.499597  
O -2.602640 5.965161 5.715411  
C -5.069100 4.977400 4.628700  
N -1.810134 6.182457 3.584616  
C -0.392200 6.071400 3.929200  
C 0.360917 5.036307 3.073978  
C -0.314512 3.663627 3.074753  
C -3.994200 5.243700 -2.125700  
C -2.865385 4.283276 -1.973604  
C -2.525450 3.138624 -2.652123  
N -1.882126 4.458628 -1.022806  
C -0.995022 3.459128 -1.142696  
N -1.356923 2.633672 -2.121113  
O 0.160687 0.861188 -2.948554  
O -0.209328 -1.137825 1.269863  
H 3.377745 -0.386958 -4.769389  
H 2.613736 -0.053790 -6.342766  
H 1.874630 -3.920481 -2.477561  
H 0.521059 -3.000697 -1.820167  
H 1.583629 -6.290478 -3.165461  
H -1.645487 -4.094491 -1.381732  
H 0.326149 -8.398708 -2.859965  
H -2.917308 -6.197129 -1.087836  
H -1.940994 -8.361866 -1.831148  
H 0.737667 -3.940700 -4.727785  
H -3.041992 -5.902983 -6.592484  
H -3.418496 -5.743271 -4.869562  
H -3.574292 -3.530043 -6.984561  
H -4.858426 -4.017278 -5.867640  
H -3.193060 -1.909894 -5.226591  
H -3.701473 -3.038915 -3.966782  
H -1.048938 -5.435292 -4.774376  
H 2.291241 1.613762 -4.050885  
H 1.612760 2.877985 -3.048316  
H 3.693906 3.099734 -1.750226  
H 6.592130 -2.435852 -2.935474  
H 5.100698 -1.951594 -3.701809  
H 3.946367 -1.712319 -0.205808  
H 5.951096 -4.927004 -3.733974  
H 5.576393 -7.357209 -3.428913

H 3.307884 -6.644173 0.178959  
H 4.274832 -8.210671 -1.502469  
H 6.068878 -0.621615 -1.129846  
H -2.744886 -5.090941 4.252340  
H -4.244614 -2.131879 6.991136  
H -1.779389 -3.311663 2.835659  
H -3.274693 -0.345439 5.567730  
H -1.460574 -0.937955 2.593271  
H 0.550325 -4.583189 9.393512  
H 1.624741 -4.513869 6.514971  
H 0.553590 -3.303877 7.241095  
H -0.115874 -6.405987 6.999513  
H -8.277908 -3.828124 -3.935905  
H -6.228346 -2.957173 -2.806424  
H -8.998954 -1.677118 -1.853214  
H 1.237368 -7.734055 2.554249  
H 3.455242 -4.289319 3.859828  
H -0.333230 -6.261288 1.334308  
H 1.862488 -2.808698 2.670816  
H -0.134366 -2.167400 1.280995  
H -2.431123 9.653507 0.417743  
H -2.252419 8.718422 1.918899  
H -4.566456 8.442423 -0.092326  
H -5.028728 5.100195 5.713052  
H -6.114359 5.017196 4.307075  
H -4.680336 7.061147 4.148206  
H 0.308820 2.945363 2.537522  
H -0.462908 3.293180 4.095244  
H -1.292483 3.710083 2.585958  
H -0.344743 5.795402 4.985212  
H -4.572162 5.012498 -3.023666  
H -4.676564 5.208522 -1.268186  
H -3.032581 2.656622 -3.474613  
H -0.101383 3.359356 -0.547944  
H -0.613230 1.645069 -2.539054  
H -4.682909 9.193710 1.505515  
H -9.821364 -1.985940 -3.383667  
H 3.919591 -1.235600 -6.242715  
H 6.707438 -0.148443 -2.695405  
H 3.940294 3.366163 -3.463349  
H 3.154272 -6.765010 3.830854  
H -0.742788 -6.583579 8.645287  
H 0.105939 7.042689 3.810710  
H -3.991147 -4.534547 6.343486  
H -1.823285 5.257302 -0.333252  
H -0.170355 -0.061943 -2.990116  
H -1.207312 -5.184808 7.663166  
H -2.036073 6.300532 2.591186  
H 1.752304 -1.429638 -3.542207  
H 3.765139 0.009954 -2.303666  
H 3.134833 -3.882455 0.760589  
C 0.361381 -0.670445 0.058271  
C 0.990637 0.727011 0.291329  
H 0.188034 1.323149 0.743471  
H 1.123627 -1.365989 -0.296487  
C 4.242985 0.670656 3.173738  
C 2.920123 0.485990 3.582896  
C 4.515172 0.875401 1.821044  
C 1.881903 0.505697 2.649997  
H 2.691354 0.336119 4.634361  
C 3.475465 0.893982 0.886914  
H 5.537649 1.028969 1.486587  
C 2.147111 0.704758 1.284342

H 0.859967 0.351744 2.976771  
H 3.699531 1.061181 -0.157721  
H -0.397665 -0.571788 -0.731374  
H -3.616429 6.268360 -2.203780  
H -4.376585 7.456135 1.361687  
H -4.231482 5.939560 2.858991  
H -8.169501 -1.354405 -3.380254  
H -0.993518 -4.621819 -6.353404  
H 1.355733 4.935454 3.528638  
O 0.607650 5.501024 1.748216  
H -0.232520 5.822164 1.358780  
H -4.677130 3.984693 4.385789  
H -9.008468 -4.144488 -2.371494  
C -6.387011 -5.076824 -2.515660  
H -5.369542 -5.199462 -2.128576  
H -7.025058 -5.811884 -2.009017  
H -6.373173 -5.328661 -3.582261  
C -6.868192 -3.301113 -0.787107  
H -7.158977 -2.263372 -0.598602  
H -7.549856 -3.948330 -0.220626  
H -5.862142 -3.439608 -0.377454  
H 1.634118 -5.781797 8.699360  
C 3.091079 -1.945046 6.806660  
H 2.236112 -1.273815 6.694745  
H 3.969825 -1.360977 7.087531  
H 3.286260 -2.451016 5.858432  
S 2.795180 -3.154153 8.145031  
H 5.049319 0.661995 3.901755

**Int2-S-SO-C1-r3**

C 3.102500 -0.877400 -5.682000  
C 2.066995 -1.988906 -5.496510  
O 1.745927 -2.714690 -6.446515  
N 1.543368 -2.127774 -4.248591  
C 0.600000 -3.203900 -3.951500  
C -0.852300 -2.722753 -4.078436  
O -1.199195 -1.644736 -3.564640  
C 0.859602 -3.790642 -2.537356  
C 0.180267 -5.126041 -2.318541  
C 0.765799 -6.307843 -2.799016  
C -1.054853 -5.212554 -1.662374  
C 0.127582 -7.539807 -2.646230  
C -1.699302 -6.442959 -1.512469  
C -1.113519 -7.609804 -2.008148  
N -1.740827 -3.508233 -4.733391  
C -1.512300 -4.820800 -5.402200  
C -2.934337 -5.310876 -5.702964  
C -3.726088 -4.012376 -5.920515  
C -3.140527 -3.064014 -4.868198  
C 3.715800 2.583800 -2.727700  
C 4.955839 1.666120 -2.674021  
O 6.081578 2.167756 -2.815854  
C 2.314073 1.995095 -3.049439  
C 1.619043 0.872859 -2.188022  
O 1.365677 1.488719 -0.878772  
O 2.188009 -0.309779 -2.149208  
N 4.749171 0.352049 -2.414075  
C 5.850300 -0.571600 -2.154800  
C 5.590552 -2.021531 -2.621588  
C 5.033104 -2.956038 -1.578417  
C 3.977887 -2.737704 -0.720310  
C 5.542613 -4.267713 -1.259986  
C 4.746164 -4.782159 -0.194110

|   |           |           |           |   |           |           |           |
|---|-----------|-----------|-----------|---|-----------|-----------|-----------|
| C | 6.592832  | -5.061125 | -1.759581 | H | 2.325501  | 1.586463  | -4.064819 |
| N | 3.801420  | -3.828973 | 0.106427  | H | 1.621844  | 2.843812  | -3.076608 |
| C | 4.975473  | -6.042616 | 0.371961  | H | 3.683313  | 3.092647  | -1.755271 |
| C | 6.823957  | -6.313053 | -1.200692 | H | 6.549735  | -2.432646 | -2.956096 |
| C | 6.022459  | -6.798807 | -0.144667 | H | 4.955291  | -1.994862 | -3.516334 |
| C | -3.595500 | -3.708200 | 5.733100  | H | 3.324884  | -1.878613 | -0.650383 |
| C | -2.883545 | -4.014714 | 4.567335  | H | 7.216934  | -4.702000 | -2.574113 |
| C | -3.715209 | -2.364515 | 6.105469  | H | 7.633112  | -6.930573 | -1.581606 |
| C | -2.294572 | -3.016082 | 3.783518  | H | 4.355189  | -6.407368 | 1.185918  |
| C | -3.134632 | -1.355647 | 5.337166  | H | 6.226952  | -7.781367 | 0.271934  |
| C | -2.415680 | -1.670894 | 4.170296  | H | 6.095888  | -0.579041 | -1.083683 |
| O | -1.872429 | -0.633187 | 3.480458  | H | -2.777583 | -5.050551 | 4.254540  |
| C | -0.412500 | -5.776300 | 7.965000  | H | -4.265996 | -2.094948 | 7.003176  |
| C | 0.692681  | -4.728540 | 7.784448  | H | -1.741555 | -3.274770 | 2.881761  |
| C | 0.123126  | -3.344593 | 7.461141  | H | -3.226662 | -0.312350 | 5.624179  |
| C | -8.821600 | -2.128900 | -2.927600 | H | -1.387507 | -0.900074 | 2.661843  |
| C | -8.103279 | -3.464352 | -2.704510 | H | 1.296859  | -4.673033 | 8.698915  |
| C | -6.763634 | -3.366194 | -1.947941 | H | -0.374221 | -3.351885 | 6.486215  |
| C | 2.467600  | -6.078000 | 3.379100  | H | -0.613634 | -3.045830 | 8.215250  |
| C | 2.576490  | -4.676505 | 3.433580  | H | -1.034089 | -5.852641 | 7.066543  |
| C | 1.449911  | -6.623985 | 2.585852  | H | -7.916406 | -3.932787 | -3.680223 |
| C | 1.705055  | -3.850718 | 2.718358  | H | -6.124519 | -2.658352 | -2.498081 |
| C | 0.570725  | -5.818023 | 1.872524  | H | -9.121037 | -1.662035 | -1.984124 |
| C | 0.656806  | -4.390304 | 1.907853  | H | 1.343069  | -7.706206 | 2.527489  |
| O | -0.185641 | -3.648869 | 1.246115  | H | 3.353024  | -4.218686 | 4.043780  |
| C | -4.213700 | 8.413900  | 0.793200  | H | -0.211513 | -6.259810 | 1.260955  |
| C | -2.718027 | 8.676648  | 0.639528  | H | 1.794739  | -2.769245 | 2.787231  |
| C | -1.876498 | 7.401956  | 0.717916  | H | -0.138564 | -2.139382 | 1.288943  |
| O | -2.537619 | 6.302211  | 0.718761  | H | -2.501723 | 9.153798  | -0.325946 |
| O | -0.628839 | 7.496845  | 0.786095  | H | -2.350513 | 9.373963  | 1.401401  |
| C | -4.309300 | 6.093200  | 3.838000  | H | -4.566428 | 7.709571  | 0.037243  |
| C | -2.887946 | 6.188132  | 4.418598  | H | -5.135236 | 5.240121  | 5.657776  |
| O | -2.707797 | 6.464162  | 5.611004  | H | -6.177493 | 5.034052  | 4.234795  |
| C | -5.140400 | 5.034700  | 4.584000  | H | -4.769533 | 7.079185  | 3.971520  |
| N | -1.880305 | 5.938317  | 3.546320  | H | 0.825732  | 2.937754  | 3.139993  |
| C | -0.461500 | 6.109000  | 3.854800  | H | 0.459567  | 3.595998  | 4.744750  |
| C | 0.410411  | 5.059182  | 3.142608  | H | -0.847441 | 3.347172  | 3.566531  |
| C | 0.197812  | 3.649193  | 3.682870  | H | -0.336465 | 6.040160  | 4.937984  |
| C | -4.009500 | 5.195300  | -2.219600 | H | -4.602249 | 4.850443  | -3.069431 |
| C | -2.860923 | 4.271462  | -1.985768 | H | -4.660385 | 5.248267  | -1.341714 |
| C | -2.417281 | 3.183291  | -2.689705 | H | -2.805818 | 2.718559  | -3.581561 |
| N | -1.985548 | 4.425944  | -0.925566 | H | -0.222174 | 3.370189  | -0.306332 |
| C | -1.050120 | 3.478548  | -0.988176 | H | -0.691270 | 1.886348  | -2.352402 |
| N | -1.292042 | 2.708101  | -2.050059 | H | -4.785142 | 9.344223  | 0.689063  |
| O | 0.294411  | 0.780251  | -2.854002 | H | -9.727888 | -2.266416 | -3.527026 |
| O | -0.243511 | -1.115300 | 1.292240  | H | 3.979308  | -1.305492 | -6.175001 |
| H | 3.401805  | -0.407018 | -4.745271 | H | 6.722783  | -0.164725 | -2.674132 |
| H | 2.687386  | -0.117755 | -6.352007 | H | 3.944638  | 3.355685  | -3.467978 |
| H | 1.943164  | -3.899801 | -2.431573 | H | 3.147266  | -6.706082 | 3.939491  |
| H | 0.530924  | -3.073975 | -1.780482 | H | 0.013513  | -6.764912 | 8.164117  |
| H | 1.733333  | -6.260116 | -3.293212 | H | -0.138520 | 7.111009  | 3.541224  |
| H | -1.493275 | -4.316443 | -1.236301 | H | -4.047271 | -4.493815 | 6.330676  |
| H | 0.600515  | -8.443424 | -3.020769 | H | -2.079725 | 5.178245  | -0.161961 |
| H | -2.655224 | -6.489966 | -0.998053 | H | 0.014783  | -0.155965 | -2.897443 |
| H | -1.613026 | -8.566943 | -1.887351 | H | -1.069009 | -5.518209 | 8.803440  |
| H | 0.793245  | -3.977933 | -4.696606 | H | -2.112038 | 5.811557  | 2.562156  |
| H | -2.959894 | -5.986035 | -6.562193 | H | 1.803559  | -1.463631 | -3.498814 |
| H | -3.328408 | -5.851646 | -4.835561 | H | 3.768747  | 0.018968  | -2.273195 |
| H | -3.537750 | -3.619724 | -6.926127 | H | 3.117914  | -3.892359 | 0.855721  |
| H | -4.805446 | -4.141295 | -5.806115 | C | 0.276617  | -0.602852 | 0.073777  |
| H | -3.171970 | -2.010718 | -5.156104 | C | 1.028030  | 0.736859  | 0.309382  |
| H | -3.656326 | -3.158775 | -3.903916 | H | 0.296206  | 1.376069  | 0.824582  |
| H | -0.964517 | -5.503357 | -4.752472 | H | 0.954649  | -1.325925 | -0.381269 |

C 4.377845 0.394078 3.069580  
C 3.066934 0.190397 3.507666  
C 4.604235 0.714952 1.731227  
C 1.998178 0.304296 2.616542  
H 2.872270 -0.054672 4.548397  
C 3.533754 0.821207 0.838551  
H 5.616403 0.888244 1.374908  
C 2.217757 0.606855 1.260355  
H 0.985728 0.142626 2.966639  
H 3.721331 1.070533 -0.195576  
H -0.531605 -0.404529 -0.644920  
H -3.663853 6.212095 -2.433202  
H -4.442632 7.989060 1.771587  
H -4.277068 5.883111 2.766018  
H -8.177489 -1.418432 -3.458864  
H -0.933044 -4.669757 -6.321336  
H 1.457482 5.353508 3.334580  
H -4.730026 4.031848 4.427449  
O 0.162417 5.022590 1.739710  
H 0.009933 5.935109 1.392010  
H -8.767539 -4.151978 -2.160807  
C -6.051535 -4.726813 -1.934591  
H -5.886766 -5.102329 -2.950945  
H -5.077048 -4.661374 -1.438726  
H -6.647680 -5.474713 -1.396737  
C -6.932489 -2.832280 -0.517667  
H -7.367701 -1.828515 -0.501037  
H -7.586421 -3.490554 0.068415  
H -5.967207 -2.780694 -0.003254  
H 1.368833 -5.036750 6.978200  
S 1.461364 -2.081165 7.424808  
C 0.501946 -0.613052 6.907600  
H -0.281308 -0.382616 7.634171  
H 1.200222 0.225298 6.861669  
H 0.055706 -0.761181 5.921722  
H 5.208804 0.310341 3.764666

**TS3-S-SO-C1-r3**

C 2.981200 -2.144500 -5.452600  
C 1.713362 -2.974133 -5.237949  
O 1.253168 -3.676659 -6.145967  
N 1.145957 -2.894895 -4.004625  
C -0.058000 -3.647800 -3.670500  
C -1.318843 -2.816368 -3.961273  
O -1.382134 -1.630116 -3.591716  
C -0.027356 -4.088511 -2.183490  
C -1.096015 -5.107170 -1.846519  
C -0.874563 -6.472849 -2.082313  
C -2.334288 -4.713097 -1.321531  
C -1.868537 -7.417010 -1.818390  
C -3.332631 -5.654206 -1.060177  
C -3.104972 -7.009254 -1.311645  
N -2.355239 -3.406792 -4.600905  
C -2.469100 -4.807800 -5.092300  
C -3.957155 -4.934764 -5.443396  
C -4.350301 -3.511691 -5.868973  
C -3.572311 -2.625957 -4.889444  
C 4.359400 1.281000 -2.723200  
C 5.311554 0.078235 -2.582692  
O 6.524884 0.256207 -2.762064  
C 2.883820 1.127797 -3.187742  
C 1.818560 0.240350 -2.481420  
O 1.490375 1.224158 -1.000874

O 2.087108 -0.957062 -2.139601  
N 4.785682 -1.108474 -2.188142  
C 5.635900 -2.245600 -1.843400  
C 5.071435 -3.616666 -2.243336  
C 4.112222 -4.254325 -1.273868  
C 3.482027 -3.695447 -0.185267  
C 3.717703 -5.641982 -1.292376  
C 2.850438 -5.850664 -0.180318  
C 4.020617 -6.731454 -2.130176  
N 2.726350 -4.646393 0.472390  
C 2.292113 -7.102685 0.107290  
C 3.467938 -7.976143 -1.848690  
C 2.612279 -8.158558 -0.740433  
C -4.473900 -2.358500 5.841600  
C -3.791186 -2.907502 4.748473  
C -4.390622 -0.976413 6.049162  
C -3.039498 -2.112174 3.877061  
C -3.644896 -0.167424 5.190833  
C -2.959095 -0.726643 4.096905  
O -2.255454 0.125182 3.307225  
C -1.952300 -4.961100 8.343100  
C -1.109361 -3.764247 8.797089  
C -0.831951 -2.793834 7.647033  
C -8.944300 -0.229400 -3.119100  
C -8.607120 -1.423387 -2.219335  
C -7.147113 -1.480057 -1.727708  
C 0.872900 -6.305300 3.913300  
C 1.378630 -5.000397 3.892242  
C -0.255019 -6.586345 3.126075  
C 0.788830 -4.000730 3.111187  
C -0.855581 -5.605752 2.344741  
C -0.362381 -4.261575 2.299348  
O -0.945076 -3.358520 1.569489  
C -1.968000 9.126100 0.048800  
C -0.542394 9.516795 0.449871  
C 0.462937 8.464130 -0.037036  
O 0.165390 7.250951 0.314592  
O 1.441716 8.797681 -0.717203  
C -2.704300 7.142500 3.241000  
C -1.353344 6.756949 3.861822  
O -1.223460 6.662640 5.086968  
C -3.858300 6.412100 3.947000  
N -0.340655 6.514163 2.986762  
C 1.027100 6.219900 3.417600  
C 1.333491 4.709546 3.429678  
C 0.667770 3.950502 4.576376  
C -2.493200 5.730900 -2.721600  
C -1.403237 4.852337 -2.169149  
C -1.071241 3.537715 -2.409421  
N -0.490178 5.297191 -1.226579  
C 0.339584 4.296840 -0.918334  
N 0.015219 3.213063 -1.617968  
O 0.630441 0.449275 -3.169680  
O -0.526505 -0.843271 1.366099  
H 3.357339 -1.688249 -4.536812  
H 2.767577 -1.360257 -6.185739  
H 0.963639 -4.511978 -1.995067  
H -0.133615 -3.206548 -1.545989  
H 0.089098 -6.798385 -2.465255  
H -2.508061 -3.665272 -1.097860  
H -1.674850 -8.470120 -2.002708  
H -4.284974 -5.328490 -0.651011  
H -3.879772 -7.741925 -1.103978

|   |           |           |           |                        |           |           |           |
|---|-----------|-----------|-----------|------------------------|-----------|-----------|-----------|
| H | -0.046782 | -4.534283 | -4.307541 | H                      | -0.425794 | 6.792407  | 1.999998  |
| H | -4.131395 | -5.685064 | -6.218840 | H                      | 1.511428  | -2.228217 | -3.312628 |
| H | -4.521021 | -5.230831 | -4.552087 | H                      | 3.760806  | -1.164460 | -2.058970 |
| H | -4.016559 | -3.319389 | -6.894839 | H                      | 2.155176  | -4.477324 | 1.296184  |
| H | -5.427217 | -3.330440 | -5.825245 | C                      | 0.074180  | -0.519044 | 0.116837  |
| H | -3.301729 | -1.648620 | -5.295383 | C                      | 1.026917  | 0.704506  | 0.248387  |
| H | -4.133830 | -2.455213 | -3.961756 | H                      | 0.408002  | 1.500370  | 0.696770  |
| H | -2.158914 | -5.518320 | -4.325857 | H                      | 0.638173  | -1.373558 | -0.263618 |
| H | 2.885210  | 0.737037  | -4.212976 | C                      | 4.206845  | -0.034135 | 3.128489  |
| H | 2.466941  | 2.136631  | -3.259354 | C                      | 2.892549  | 0.177373  | 3.554424  |
| H | 4.374287  | 1.786344  | -1.748747 | C                      | 4.491585  | -0.005558 | 1.763196  |
| H | 5.927406  | -4.295044 | -2.363823 | C                      | 1.877851  | 0.414652  | 2.625249  |
| H | 4.622066  | -3.538313 | -3.242655 | H                      | 2.657358  | 0.166139  | 4.615302  |
| H | 3.506619  | -2.679226 | 0.182071  | C                      | 3.472201  | 0.231961  | 0.835689  |
| H | 4.675997  | -6.602531 | -2.987695 | H                      | 5.509055  | -0.161939 | 1.413834  |
| H | 3.695592  | -8.823381 | -2.489958 | C                      | 2.152703  | 0.441754  | 1.247310  |
| H | 1.633404  | -7.236289 | 0.960233  | H                      | 0.859985  | 0.569469  | 2.965689  |
| H | 2.195593  | -9.142882 | -0.545202 | H                      | 3.698063  | 0.253056  | -0.219995 |
| H | 5.853755  | -2.243768 | -0.765759 | H                      | -0.689197 | -0.262159 | -0.634169 |
| H | -3.836620 | -3.978006 | 4.564467  | H                      | -2.077770 | 6.607225  | -3.229958 |
| H | -4.911170 | -0.518965 | 6.886772  | H                      | -2.208046 | 8.129102  | 0.419311  |
| H | -2.509152 | -2.558535 | 3.036992  | H                      | -2.708022 | 6.929242  | 2.168748  |
| H | -3.582007 | 0.905077  | 5.349846  | H                      | -8.284547 | -0.195068 | -3.994151 |
| H | -1.752286 | -0.316046 | 2.579414  | H                      | -1.831613 | -4.941744 | -5.974859 |
| H | -1.628954 | -3.232216 | 9.603742  | H                      | 2.420992  | 4.593477  | 3.506338  |
| H | -0.271729 | -3.291324 | 6.847862  | H                      | -3.794757 | 5.331174  | 3.785816  |
| H | -1.771231 | -2.425469 | 7.222704  | O                      | 0.985350  | 4.129550  | 2.165689  |
| H | -1.442716 | -5.528429 | 7.556640  | H                      | 0.040094  | 4.308637  | 2.045768  |
| H | -8.824984 | -2.351153 | -2.765487 | H                      | -9.274408 | -1.423430 | -1.345069 |
| H | -6.497800 | -1.468288 | -2.617116 | C                      | -6.884504 | -2.791597 | -0.973067 |
| H | -8.841957 | 0.723643  | -2.590686 | H                      | -7.106183 | -3.664008 | -1.598088 |
| H | -0.673063 | -7.592151 | 3.126616  | H                      | -5.839616 | -2.863041 | -0.652627 |
| H | 2.250221  | -4.750681 | 4.495283  | H                      | -7.511259 | -2.857254 | -0.074979 |
| H | -1.726054 | -5.840688 | 1.737763  | C                      | -6.771867 | -0.272593 | -0.855865 |
| H | 1.183288  | -2.986363 | 3.127415  | H                      | -6.873837 | 0.673564  | -1.396129 |
| H | -0.580133 | -1.856795 | 1.464124  | H                      | -7.412866 | -0.221160 | 0.033352  |
| H | -0.268814 | 10.496419 | 0.045987  | H                      | -5.734697 | -0.345663 | -0.512342 |
| H | -0.474231 | 9.577345  | 1.544463  | H                      | -0.159403 | -4.117580 | 9.216897  |
| H | -2.075672 | 9.110550  | -1.042400 | S                      | 0.144338  | -1.349450 | 8.236310  |
| H | -3.816115 | 6.595382  | 5.022843  | C                      | 0.245533  | -0.387666 | 6.684551  |
| H | -4.825990 | 6.754946  | 3.568600  | H                      | -0.751392 | -0.119108 | 6.327514  |
| H | -2.823640 | 8.227182  | 3.356061  | H                      | 0.805486  | 0.523526  | 6.905191  |
| H | 0.921523  | 2.888695  | 4.513132  | H                      | 0.770690  | -0.952887 | 5.910866  |
| H | 1.001811  | 4.335439  | 5.545239  | H                      | 4.996871  | -0.213385 | 3.852667  |
| H | -0.420807 | 4.053517  | 4.536420  |                        |           |           |           |
| H | 1.194498  | 6.646349  | 4.410855  | <b>Prod-S-SO-C1-r3</b> |           |           |           |
| H | -3.094734 | 5.170881  | -3.440448 | C                      | 2.707803  | -2.402712 | -5.533602 |
| H | -3.153776 | 6.088172  | -1.924942 | C                      | 1.394829  | -3.146943 | -5.285842 |
| H | -1.516981 | 2.817900  | -3.077239 | O                      | 0.778029  | -3.682596 | -6.209831 |
| H | 1.117000  | 4.357368  | -0.171394 | N                      | 0.934597  | -3.176215 | -4.000789 |
| H | 0.585387  | 2.259656  | -1.461050 | C                      | -0.408667 | -3.670672 | -3.703629 |
| H | -2.709678 | 9.830679  | 0.441722  | C                      | -1.444674 | -2.703382 | -4.312038 |
| H | -9.975038 | -0.292103 | -3.484202 | O                      | -1.254388 | -1.471239 | -4.250535 |
| H | 3.748965  | -2.793928 | -5.881258 | C                      | -0.600517 | -3.802385 | -2.173486 |
| H | 6.587248  | -2.078974 | -2.354099 | C                      | -1.848900 | -4.571402 | -1.793934 |
| H | 4.854130  | 1.959034  | -3.423118 | C                      | -1.834220 | -5.973840 | -1.771618 |
| H | 1.338338  | -7.075374 | 4.521149  | C                      | -3.043948 | -3.910500 | -1.482776 |
| H | -2.146863 | -5.643677 | 9.176838  | C                      | -2.987749 | -6.697133 | -1.461131 |
| H | 1.694693  | 6.706271  | 2.701572  | C                      | -4.199151 | -4.629828 | -1.171359 |
| H | -5.057129 | -2.987927 | 6.506512  | C                      | -4.176523 | -6.026667 | -1.163874 |
| H | -0.361490 | 6.230326  | -0.730481 | N                      | -2.559392 | -3.205842 | -4.877850 |
| H | 0.071475  | -0.351547 | -3.084476 | C                      | -2.927105 | -4.633002 | -5.086680 |
| H | -2.917791 | -4.633635 | 7.942951  | C                      | -4.387250 | -4.551072 | -5.546889 |

|   |           |           |           |   |            |           |           |
|---|-----------|-----------|-----------|---|------------|-----------|-----------|
| C | -4.450998 | -3.216544 | -6.305491 | H | 2.476279   | -1.470631 | -6.057502 |
| C | -3.554803 | -2.291786 | -5.473262 | H | 0.282423   | -4.315511 | -1.780865 |
| C | 4.395927  | 0.893862  | -2.819442 | H | -0.620238  | -2.800499 | -1.733691 |
| C | 5.251531  | -0.386257 | -2.772581 | H | -0.909314  | -6.502806 | -1.985689 |
| O | 6.415286  | -0.374839 | -3.184771 | H | -3.065683  | -2.824460 | -1.468835 |
| C | 3.165939  | 0.917382  | -3.755869 | H | -2.954920  | -7.783003 | -1.444891 |
| C | 1.986079  | 0.021013  | -3.413070 | H | -5.112812  | -4.098809 | -0.921243 |
| O | 1.519586  | 1.078588  | -0.092546 | H | -5.074175  | -6.586740 | -0.917665 |
| O | 1.969465  | -0.819465 | -2.518791 | H | -0.504779  | -4.653622 | -4.169990 |
| N | 4.673770  | -1.483920 | -2.207781 | H | -4.671338  | -5.412117 | -6.157054 |
| C | 5.407239  | -2.725046 | -1.970747 | H | -5.046589  | -4.522365 | -4.672606 |
| C | 4.679619  | -4.011357 | -2.378304 | H | -4.035392  | -3.335113 | -7.312330 |
| C | 3.651218  | -4.539758 | -1.415341 | H | -5.466720  | -2.825723 | -6.404816 |
| C | 3.151157  | -3.968581 | -0.266278 | H | -3.048641  | -1.521892 | -6.059853 |
| C | 3.035372  | -5.840303 | -1.513944 | H | -4.115739  | -1.787122 | -4.677306 |
| C | 2.176699  | -5.988935 | -0.387450 | H | -2.807362  | -5.208297 | -4.169864 |
| C | 3.137764  | -6.898204 | -2.436442 | H | 3.455515   | 0.671825  | -4.784863 |
| N | 2.267044  | -4.832006 | 0.352072  | H | 2.777005   | 1.940602  | -3.799593 |
| C | 1.431706  | -7.154332 | -0.164907 | H | 4.059626   | 1.131157  | -1.803379 |
| C | 2.400606  | -8.056770 | -2.219899 | H | 5.451374   | -4.783513 | -2.506305 |
| C | 1.556683  | -8.182117 | -1.094690 | H | 4.241122   | -3.875950 | -3.375646 |
| C | -4.549441 | -2.076174 | 5.886005  | H | 3.358681   | -3.006801 | 0.182532  |
| C | -3.961038 | -2.672291 | 4.767158  | H | 3.783059   | -6.811222 | -3.306603 |
| C | -4.322977 | -0.716693 | 6.125551  | H | 2.471972   | -8.880038 | -2.925368 |
| C | -3.154831 | -1.937914 | 3.896699  | H | 0.781955   | -7.243353 | 0.700250  |
| C | -3.517785 | 0.031620  | 5.267998  | H | 0.994247   | -9.100522 | -0.950601 |
| C | -2.922095 | -0.572842 | 4.146103  | H | 5.694451   | -2.792195 | -0.912211 |
| O | -2.151165 | 0.199681  | 3.348173  | H | -4.129117  | -3.726665 | 4.562274  |
| C | -2.197576 | -4.877714 | 8.337493  | H | -4.776663  | -0.232650 | 6.986840  |
| C | -0.908236 | -4.067781 | 8.157093  | H | -2.711868  | -2.419500 | 3.028906  |
| C | -1.171712 | -2.561918 | 8.226819  | H | -3.338293  | 1.088055  | 5.445257  |
| C | -8.990402 | 0.430906  | -2.991406 | H | -1.698391  | -0.342563 | 2.634314  |
| C | -9.103941 | -0.988705 | -2.426260 | H | -0.182544  | -4.351147 | 8.929794  |
| C | -7.941156 | -1.929710 | -2.797612 | H | -1.848434  | -2.256200 | 7.422581  |
| C | 0.438523  | -6.421860 | 3.856715  | H | -1.638938  | -2.298280 | 9.182644  |
| C | 0.924146  | -5.111973 | 3.791018  | H | -2.932190  | -4.621872 | 7.566588  |
| C | -0.695348 | -6.750144 | 3.099917  | H | -10.041263 | -1.438125 | -2.781345 |
| C | 0.306065  | -4.148943 | 2.989615  | H | -7.865017  | -1.942663 | -3.896084 |
| C | -1.323796 | -5.805067 | 2.296030  | H | -8.123582  | 0.964612  | -2.589638 |
| C | -0.848512 | -4.460930 | 2.206634  | H | -1.095204  | -7.762211 | 3.141725  |
| O | -1.455029 | -3.586566 | 1.452756  | H | 1.797845   | -4.828950 | 4.375523  |
| C | -1.250104 | 9.199300  | 0.080002  | H | -2.201494  | -6.069356 | 1.711881  |
| C | 0.203332  | 9.477334  | 0.472374  | H | 0.672774   | -3.125687 | 2.976923  |
| C | 1.171585  | 8.373288  | 0.019065  | H | -1.023308  | -2.224000 | 1.499005  |
| O | 0.763199  | 7.164747  | 0.276544  | H | 0.547737   | 10.434808 | 0.069696  |
| O | 2.244337  | 8.669505  | -0.519158 | H | 0.277579   | 9.541694  | 1.567120  |
| C | -2.085500 | 7.267311  | 3.279411  | H | -1.369605  | 9.203214  | -1.009790 |
| C | -0.758502 | 6.749249  | 3.863513  | H | -3.162115  | 6.898815  | 5.125612  |
| O | -0.637436 | 6.568340  | 5.081731  | H | -4.218779  | 7.123327  | 3.712385  |
| C | -3.276003 | 6.689692  | 4.060091  | H | -2.079284  | 8.361993  | 3.357640  |
| N | 0.237658  | 6.509252  | 2.974656  | H | 1.685532   | 2.946800  | 1.816714  |
| C | 1.564805  | 6.054798  | 3.389688  | H | 0.998552   | 3.309827  | 3.414650  |
| C | 2.152254  | 4.927571  | 2.528687  | H | 0.269054   | 4.002778  | 1.954992  |
| C | 1.217500  | 3.723527  | 2.423654  | H | 1.469689   | 5.717225  | 4.424276  |
| C | -2.086198 | 5.866310  | -2.689500 | H | -2.872729  | 5.390581  | -3.280713 |
| C | -1.122568 | 4.832476  | -2.191742 | H | -2.564917  | 6.405588  | -1.863852 |
| C | -1.044926 | 3.468007  | -2.372883 | H | -1.708770  | 2.838346  | -2.949994 |
| N | -0.042868 | 5.142791  | -1.389186 | H | 1.494645   | 3.972617  | -0.488241 |
| C | 0.618145  | 3.991322  | -1.120009 | H | 0.859696   | 1.503678  | -0.684367 |
| N | 0.044985  | 2.945875  | -1.698499 | H | -1.928587  | 9.956330  | 0.488560  |
| O | 0.960116  | 0.204617  | -4.239445 | H | -9.879527  | 1.022182  | -2.747811 |
| O | -0.812477 | -1.195827 | 1.587061  | H | 3.332703   | -3.008934 | -6.193021 |
| H | 3.257614  | -2.174775 | -4.620184 | H | 6.331331   | -2.632472 | -2.544627 |

|                       |           |           |           |   |           |           |           |
|-----------------------|-----------|-----------|-----------|---|-----------|-----------|-----------|
| H                     | 5.073947  | 1.685617  | -3.140861 | C | 0.256288  | -5.511377 | -3.764636 |
| H                     | 0.925681  | -7.165375 | 4.480778  | C | -1.443241 | -4.287807 | -2.572217 |
| H                     | -1.998402 | -5.951880 | 8.267996  | C | -0.475986 | -6.690022 | -3.606464 |
| H                     | 2.270975  | 6.897100  | 3.379935  | C | -2.179697 | -5.463437 | -2.414287 |
| H                     | -5.178493 | -2.656493 | 6.554562  | C | -1.699110 | -6.668681 | -2.931730 |
| H                     | 0.196990  | 6.042894  | -0.940517 | N | -2.163630 | -2.445188 | -5.464192 |
| H                     | 0.227335  | -0.448727 | -4.062337 | C | -1.979200 | -3.635492 | -6.320495 |
| H                     | -2.655556 | -4.683962 | 9.314106  | C | -3.417038 | -4.099479 | -6.593224 |
| H                     | 0.137690  | 6.785970  | 1.992664  | C | -4.223886 | -2.791750 | -6.572141 |
| H                     | 1.368350  | -2.571437 | -3.309045 | C | -3.567932 | -1.994417 | -5.439235 |
| H                     | 3.697486  | -1.405132 | -1.939525 | C | 3.274524  | 3.269387  | -2.573903 |
| H                     | 1.743246  | -4.634314 | 1.200607  | C | 4.532016  | 2.418512  | -2.803389 |
| C                     | -0.048550 | -0.689936 | 0.517120  | O | 5.626576  | 2.972678  | -2.957878 |
| C                     | 0.862609  | 0.459434  | 1.002401  | C | 1.881462  | 2.623974  | -2.740646 |
| H                     | 0.210293  | 1.178113  | 1.522658  | C | 1.585652  | 1.417266  | -1.827940 |
| H                     | 0.578005  | -1.475523 | 0.072824  | O | 1.313732  | 1.666058  | -0.607373 |
| C                     | 3.810943  | -1.009298 | 3.820290  | O | 1.663886  | 0.254547  | -2.323299 |
| C                     | 2.507427  | -0.732470 | 4.240104  | N | 4.403718  | 1.065715  | -2.787078 |
| C                     | 4.163270  | -0.790903 | 2.486814  | C | 5.558985  | 0.190618  | -2.951901 |
| C                     | 1.565930  | -0.241500 | 3.333206  | C | 5.166119  | -1.240327 | -3.385827 |
| H                     | 2.220230  | -0.896992 | 5.275250  | C | 5.068706  | -2.235205 | -2.263903 |
| C                     | 3.217867  | -0.306307 | 1.578752  | C | 3.978308  | -2.507663 | -1.471614 |
| H                     | 5.177369  | -0.992678 | 2.151598  | C | 6.137544  | -3.074988 | -1.781119 |
| C                     | 1.907163  | -0.029091 | 1.989723  | C | 5.616005  | -3.835777 | -0.694665 |
| H                     | 0.554491  | -0.027831 | 3.663455  | C | 7.479429  | -3.267662 | -2.158972 |
| H                     | 3.494043  | -0.128386 | 0.545707  | N | 4.300475  | -3.468224 | -0.534058 |
| H                     | -0.690216 | -0.287928 | -0.286576 | C | 6.391169  | -4.769300 | 0.004339  |
| H                     | -1.592268 | 6.611747  | -3.323936 | C | 8.253343  | -4.190624 | -1.464765 |
| H                     | -1.566937 | 8.220311  | 0.442036  | C | 7.713861  | -4.934127 | -0.392884 |
| H                     | -2.156025 | 7.022155  | 2.215840  | C | -2.848101 | -5.148715 | 4.928007  |
| H                     | -8.892959 | 0.414426  | -4.083427 | C | -2.272156 | -4.928224 | 3.673560  |
| H                     | -2.284770 | -5.064985 | -5.864090 | C | -2.786722 | -4.130809 | 5.885985  |
| H                     | -3.335399 | 5.603909  | 3.935440  | C | -1.639077 | -3.720520 | 3.371274  |
| H                     | 3.064298  | 4.605974  | 3.052263  | C | -2.157344 | -2.920447 | 5.599929  |
| O                     | 2.595344  | 5.373869  | 1.248824  | C | -1.571409 | -2.704319 | 4.339819  |
| H                     | 1.953212  | 6.018732  | 0.865245  | O | -0.964508 | -1.512881 | 4.126826  |
| H                     | -9.185698 | -0.942476 | -1.330716 | C | 0.627200  | -7.479697 | 6.298301  |
| C                     | -8.237634 | -3.362311 | -2.330586 | C | 0.861805  | -6.427751 | 7.388499  |
| H                     | -7.435697 | -4.050432 | -2.619805 | C | 1.093335  | -5.034550 | 6.798586  |
| H                     | -8.331251 | -3.404303 | -1.238244 | C | -9.050906 | -1.976800 | -2.573998 |
| H                     | -9.173849 | -3.738114 | -2.758760 | C | -8.613505 | -2.911459 | -1.440786 |
| C                     | -6.594950 | -1.446828 | -2.237968 | C | -7.805050 | -2.236443 | -0.315208 |
| H                     | -6.326372 | -0.453153 | -2.608775 | C | 2.988490  | -6.583589 | 1.498899  |
| H                     | -6.623648 | -1.396752 | -1.142201 | C | 2.970415  | -5.422174 | 2.274086  |
| H                     | -5.786835 | -2.131759 | -2.516294 | C | 2.133318  | -6.677077 | 0.395345  |
| H                     | -0.451189 | -4.312298 | 7.190928  | C | 2.122180  | -4.358485 | 1.951042  |
| S                     | 0.393724  | -1.608500 | 8.062471  | C | 1.281441  | -5.627946 | 0.061401  |
| C                     | -0.278461 | 0.091510  | 8.044600  | C | 1.274161  | -4.452208 | 0.832863  |
| H                     | 0.564504  | 0.770487  | 7.901580  | O | 0.444623  | -3.453242 | 0.456810  |
| H                     | -0.983616 | 0.218217  | 7.219734  | C | -4.397300 | 7.714700  | 2.962000  |
| H                     | -0.771124 | 0.329122  | 8.990992  | C | -3.217424 | 8.035336  | 2.043616  |
| H                     | 4.545512  | -1.386051 | 4.526832  | C | -2.129889 | 6.952580  | 2.075046  |
| <b>TS1-S-SO-C2-r3</b> |           |           |           |   |           |           |           |
| C                     | 2.447793  | 0.524001  | -6.160499 | O | -2.531040 | 5.736413  | 2.101640  |
| C                     | 1.616222  | -0.756824 | -6.134124 | O | -0.932377 | 7.323769  | 2.077965  |
| O                     | 1.404651  | -1.410793 | -7.160559 | C | -4.080300 | 4.772600  | 5.393000  |
| N                     | 1.114987  | -1.115633 | -4.916877 | C | -2.592614 | 4.791198  | 5.778814  |
| C                     | 0.228517  | -2.266115 | -4.760912 | O | -2.252391 | 4.569186  | 6.949344  |
| C                     | -1.240281 | -1.793210 | -4.726150 | C | -4.656600 | 3.354700  | 5.574600  |
| O                     | -1.561653 | -0.835376 | -4.004280 | N | -1.702209 | 5.019745  | 4.780564  |
| C                     | 0.571333  | -3.016594 | -3.448984 | C | -0.256800 | 5.000400  | 5.024699  |
| C                     | -0.216909 | -4.293682 | -3.252746 | C | 0.624514  | 4.579399  | 3.829697  |
|                       |           |           |           | C | 0.049611  | 3.397557  | 3.042681  |
|                       |           |           |           | C | -4.426102 | 5.264302  | -0.708499 |



|   |           |           |           |                        |           |           |           |
|---|-----------|-----------|-----------|------------------------|-----------|-----------|-----------|
| C | -3.227864 | 4.472010  | -1.101397 | H                      | -4.826837 | 4.938111  | 0.256634  |
| C | -2.908415 | 3.767802  | -2.238277 | H                      | -3.505840 | 3.637536  | -3.130686 |
| N | -2.138239 | 4.326941  | -0.269385 | H                      | -0.276224 | 3.265083  | -0.487283 |
| C | -1.224515 | 3.558932  | -0.916233 | H                      | -0.979760 | 2.352589  | -3.724973 |
| N | -1.656648 | 3.198950  | -2.117358 | H                      | -5.165772 | 8.494281  | 2.908740  |
| O | -0.790214 | 1.912165  | -4.581447 | H                      | -9.560083 | -2.534175 | -3.367518 |
| O | 0.336909  | -1.228544 | 1.830031  | H                      | 3.060450  | 0.525963  | -7.062384 |
| H | 3.079519  | 0.631663  | -5.275929 | H                      | 6.207103  | 0.652095  | -3.703840 |
| H | 1.764574  | 1.380077  | -6.187459 | H                      | 3.362916  | 4.125776  | -3.248334 |
| H | 1.642893  | -3.237821 | -3.474015 | H                      | 3.651795  | -7.404449 | 1.753111  |
| H | 0.398847  | -2.331388 | -2.613355 | H                      | 0.463243  | -8.469363 | 6.736786  |
| H | 1.210880  | -5.535001 | -4.284709 | H                      | 0.091161  | 5.987993  | 5.357724  |
| H | -1.816542 | -3.355203 | -2.158912 | H                      | -3.341091 | -6.089703 | 5.151951  |
| H | -0.089320 | -7.623612 | -4.005475 | H                      | -2.072397 | 4.764625  | 0.664346  |
| H | -3.124886 | -5.438830 | -1.879440 | H                      | -0.946373 | 0.973563  | -4.382997 |
| H | -2.268952 | -7.584499 | -2.803729 | H                      | -0.250902 | -7.228613 | 5.693704  |
| H | 0.407343  | -2.910988 | -5.622128 | H                      | -2.042017 | 5.219604  | 3.835053  |
| H | -3.499607 | -4.648023 | -7.534873 | H                      | 1.245595  | -0.503409 | -4.107146 |
| H | -3.749279 | -4.759980 | -5.784859 | H                      | 3.487413  | 0.636623  | -2.667837 |
| H | -4.105665 | -2.260315 | -7.523001 | H                      | 3.674191  | -3.817174 | 0.179297  |
| H | -5.292449 | -2.947099 | -6.403709 | C                      | 0.613092  | -0.014119 | 0.473076  |
| H | -3.615100 | -0.911450 | -5.573301 | C                      | 1.160729  | -0.065603 | 1.829084  |
| H | -4.014248 | -2.226569 | -4.464168 | H                      | 0.756982  | 0.705200  | 2.494516  |
| H | -1.386083 | -4.398425 | -5.813810 | H                      | 1.026458  | -0.642303 | -0.299697 |
| H | 1.716098  | 2.311222  | -3.772394 | C                      | 5.330948  | -0.659880 | 2.761156  |
| H | 1.137371  | 3.394049  | -2.522215 | C                      | 4.330311  | -1.126930 | 3.619146  |
| H | 3.368782  | 3.671536  | -1.556935 | C                      | 4.978254  | 0.002447  | 1.585019  |
| H | 5.919753  | -1.593280 | -4.098639 | C                      | 2.988209  | -0.934602 | 3.294801  |
| H | 4.224139  | -1.200553 | -3.944432 | H                      | 4.597857  | -1.636512 | 4.540763  |
| H | 2.990303  | -2.070248 | -1.500632 | C                      | 3.632174  | 0.192779  | 1.257596  |
| H | 7.907618  | -2.700833 | -2.981663 | H                      | 5.750468  | 0.373214  | 0.917023  |
| H | 9.290721  | -4.344371 | -1.748850 | C                      | 2.627688  | -0.282168 | 2.106624  |
| H | 5.968789  | -5.344075 | 0.823039  | H                      | 2.206106  | -1.288861 | 3.961531  |
| H | 8.342652  | -5.649119 | 0.130281  | H                      | 3.357297  | 0.721999  | 0.352282  |
| H | 6.144766  | 0.148353  | -2.024261 | H                      | -0.373336 | 0.400106  | 0.338044  |
| H | -2.313124 | -5.704116 | 2.913517  | H                      | -4.198102 | 6.332486  | -0.615569 |
| H | -3.233086 | -4.277813 | 6.865983  | H                      | -4.074643 | 7.637244  | 4.005381  |
| H | -1.198689 | -3.564078 | 2.391409  | H                      | -4.220302 | 5.111949  | 4.363396  |
| H | -2.111136 | -2.125453 | 6.338022  | H                      | -8.188101 | -1.472640 | -3.024525 |
| H | -0.573245 | -1.442913 | 3.210041  | H                      | -1.465250 | -3.355346 | -7.248784 |
| H | -0.003061 | -6.397277 | 8.062453  | H                      | 1.570090  | 4.252323  | 4.285200  |
| H | 1.971793  | -5.037077 | 6.143676  | H                      | -4.177572 | 2.648147  | 4.889297  |
| H | 0.227512  | -4.717363 | 6.208884  | H                      | -9.498038 | -3.395397 | -1.001038 |
| H | 1.487171  | -7.549883 | 5.623226  | C                      | -7.270814 | -3.286218 | 0.670050  |
| H | -8.005559 | -3.721626 | -1.865121 | H                      | -6.658002 | -2.823594 | 1.451055  |
| H | -6.939121 | -1.741814 | -0.780917 | H                      | -8.096137 | -3.813639 | 1.164884  |
| H | -9.740823 | -1.202307 | -2.224229 | H                      | -6.654587 | -4.035564 | 0.161093  |
| H | 2.133915  | -7.575030 | -0.216645 | C                      | -8.614919 | -1.164146 | 0.428851  |
| H | 3.623204  | -5.332913 | 3.138271  | H                      | -8.950540 | -0.363552 | -0.237300 |
| H | 0.623155  | -5.689608 | -0.798125 | H                      | -9.504221 | -1.604410 | 0.897940  |
| H | 2.117585  | -3.454053 | 2.549388  | H                      | -8.016049 | -0.703210 | 1.221601  |
| H | 0.553500  | -2.632347 | 1.021556  | S                      | 1.363202  | -3.797657 | 8.134901  |
| H | -3.570840 | 8.121868  | 1.006588  | H                      | 1.725780  | -6.714064 | 8.000990  |
| H | -2.758878 | 8.994621  | 2.302128  | C                      | 1.613769  | -2.291372 | 7.129195  |
| H | -4.851722 | 6.762457  | 2.681257  | H                      | 0.747514  | -2.095603 | 6.493009  |
| H | -4.486317 | 3.006404  | 6.596895  | H                      | 1.742504  | -1.458710 | 7.823736  |
| H | -5.733025 | 3.341140  | 5.377274  | H                      | 2.512235  | -2.381030 | 6.513370  |
| H | -4.596825 | 5.473972  | 6.056987  | O                      | 0.991315  | 5.655479  | 2.985330  |
| H | 0.763884  | 3.089944  | 2.273919  | H                      | 0.196130  | 6.116204  | 2.617226  |
| H | -0.153346 | 2.543510  | 3.699324  | H                      | 6.377411  | -0.808179 | 3.011816  |
| H | -0.885016 | 3.677046  | 2.550188  |                        |           |           |           |
| H | -0.095425 | 4.309724  | 5.857910  |                        |           |           |           |
| H | -5.212057 | 5.155042  | -1.460648 |                        |           |           |           |
|   |           |           |           | <b>Int1-S-SO-C2-r3</b> |           |           |           |
|   |           |           |           | C                      | 2.284501  | 0.322797  | -6.302402 |

|   |           |           |           |   |           |           |           |
|---|-----------|-----------|-----------|---|-----------|-----------|-----------|
| C | 1.351970  | -0.888188 | -6.278719 | C | -1.877689 | 4.983505  | 5.935051  |
| O | 1.113164  | -1.550519 | -7.291919 | O | -1.545859 | 4.951895  | 7.127346  |
| N | 0.802375  | -1.172931 | -5.061765 | C | -4.088800 | 3.738002  | 5.752103  |
| C | -0.190199 | -2.224606 | -4.868714 | N | -1.000751 | 4.924926  | 4.903808  |
| C | -1.594685 | -1.593389 | -4.775600 | C | 0.455413  | 4.877494  | 5.027718  |
| O | -1.778254 | -0.615707 | -4.031485 | C | 1.057399  | 3.793637  | 4.124521  |
| C | 0.117938  | -3.027069 | -3.580043 | C | 0.658107  | 2.392251  | 4.577386  |
| C | -0.828629 | -4.186030 | -3.347768 | C | -3.835805 | 5.708499  | -0.559411 |
| C | -0.581640 | -5.440177 | -3.927235 | C | -2.792214 | 4.685171  | -0.861867 |
| C | -1.978066 | -4.029537 | -2.560289 | C | -2.481554 | 3.988866  | -2.007171 |
| C | -1.460276 | -6.507519 | -3.729258 | N | -1.874656 | 4.261578  | 0.075624  |
| C | -2.857765 | -5.094993 | -2.358487 | C | -1.063049 | 3.356514  | -0.521867 |
| C | -2.603313 | -6.337051 | -2.944569 | N | -1.398725 | 3.159871  | -1.790510 |
| N | -2.609095 | -2.124258 | -5.489232 | O | -0.655660 | 2.033624  | -4.336810 |
| C | -2.586200 | -3.309801 | -6.372896 | O | 0.616854  | -1.479964 | 1.919070  |
| C | -4.074488 | -3.607557 | -6.601285 | H | 2.986494  | 0.312132  | -5.464671 |
| C | -4.731474 | -2.220117 | -6.530087 | H | 1.686430  | 1.236773  | -6.218924 |
| C | -3.952701 | -1.519679 | -5.410459 | H | 1.145669  | -3.393985 | -3.667806 |
| C | 3.528111  | 2.894569  | -2.707522 | H | 0.086150  | -2.338717 | -2.730127 |
| C | 4.629112  | 1.890282  | -3.073190 | H | 0.312080  | -5.582410 | -4.530187 |
| O | 5.742286  | 2.327822  | -3.381954 | H | -2.175181 | -3.068968 | -2.093078 |
| C | 2.032069  | 2.495773  | -2.479696 | H | -1.248121 | -7.472217 | -4.181541 |
| C | 1.667549  | 1.149052  | -1.868910 | H | -3.734377 | -4.957522 | -1.731951 |
| O | 1.413448  | 1.132007  | -0.559962 | H | -3.283887 | -7.167823 | -2.782515 |
| O | 1.581583  | 0.128271  | -2.551888 | H | -0.115026 | -2.875701 | -5.740666 |
| N | 4.384669  | 0.561918  | -2.964465 | H | -4.247961 | -4.124462 | -7.548455 |
| C | 5.437678  | -0.414124 | -3.203983 | H | -4.450381 | -4.244633 | -5.793244 |
| C | 4.912789  | -1.861390 | -3.304926 | H | -4.590532 | -1.686509 | -7.476680 |
| C | 4.870508  | -2.625484 | -2.012111 | H | -5.803796 | -2.261417 | -6.323540 |
| C | 3.762134  | -3.079781 | -1.337730 | H | -3.882684 | -0.436136 | -5.529359 |
| C | 6.013697  | -3.082182 | -1.256943 | H | -4.389139 | -1.716464 | -4.423207 |
| C | 5.513299  | -3.803721 | -0.134242 | H | -2.064295 | -4.143156 | -5.900027 |
| C | 7.407018  | -2.969961 | -1.421367 | H | 1.500858  | 2.483579  | -3.434672 |
| N | 4.140933  | -3.787398 | -0.215412 | H | 1.578495  | 3.280660  | -1.871174 |
| C | 6.359629  | -4.394633 | 0.812225  | H | 3.905203  | 3.369664  | -1.794574 |
| C | 8.250405  | -3.556219 | -0.484124 | H | 5.574255  | -2.390374 | -4.003021 |
| C | 7.731136  | -4.259556 | 0.623617  | H | 3.923316  | -1.861136 | -3.777241 |
| C | -3.265899 | -4.913191 | 4.876107  | H | 2.714313  | -2.959576 | -1.572816 |
| C | -2.739145 | -4.721157 | 3.592643  | H | 7.822028  | -2.433472 | -2.270448 |
| C | -2.885609 | -4.021288 | 5.886400  | H | 9.326997  | -3.472566 | -0.603322 |
| C | -1.850855 | -3.677595 | 3.313061  | H | 5.956619  | -4.942680 | 1.658769  |
| C | -1.999758 | -2.976760 | 5.624569  | H | 8.414336  | -4.705822 | 1.340675  |
| C | -1.460748 | -2.788349 | 4.334272  | H | 6.193973  | -0.341946 | -2.413408 |
| O | -0.598712 | -1.768840 | 4.158864  | H | -3.020341 | -5.395770 | 2.787411  |
| C | -0.034208 | -7.643313 | 6.097498  | H | -3.281069 | -4.138656 | 6.892486  |
| C | 0.741631  | -6.629736 | 6.947628  | H | -1.453999 | -3.545386 | 2.310631  |
| C | 1.118024  | -5.381749 | 6.145754  | H | -1.705544 | -2.287655 | 6.410799  |
| C | -9.304200 | -0.933499 | -2.370700 | H | -0.173916 | -1.685281 | 3.222029  |
| C | -8.919987 | -2.406292 | -2.548810 | H | 0.136146  | -6.335752 | 7.813885  |
| C | -7.405750 | -2.693103 | -2.513628 | H | 1.746312  | -5.653066 | 5.290648  |
| C | 2.260813  | -6.934031 | 1.235208  | H | 0.220443  | -4.885016 | 5.764593  |
| C | 2.299396  | -5.875929 | 2.148126  | H | 0.557906  | -7.974583 | 5.237279  |
| C | 1.539270  | -6.767220 | 0.047930  | H | -9.318150 | -2.762669 | -3.508589 |
| C | 1.638617  | -4.670461 | 1.887709  | H | -6.932125 | -2.060292 | -3.280410 |
| C | 0.881066  | -5.572069 | -0.229664 | H | -9.018798 | -0.551144 | -1.385765 |
| C | 0.922781  | -4.492694 | 0.680930  | H | 1.492633  | -7.577340 | -0.675885 |
| O | 0.290579  | -3.357250 | 0.367755  | H | 2.851805  | -5.983555 | 3.078515  |
| C | -3.415309 | 8.075402  | 3.141799  | H | 0.326977  | -5.444666 | -1.153427 |
| C | -2.030967 | 8.092172  | 2.485102  | H | 1.654594  | -3.858063 | 2.606947  |
| C | -1.369913 | 6.707683  | 2.377488  | H | 0.480227  | -2.531278 | 1.047808  |
| O | -2.155498 | 5.700255  | 2.353695  | H | -2.107733 | 8.489036  | 1.462436  |
| O | -0.114937 | 6.648110  | 2.314097  | H | -1.343647 | 8.760007  | 3.015326  |
| C | -3.355797 | 5.074101  | 5.519794  | H | -4.078647 | 7.382080  | 2.621151  |

H -3.992580 3.421135 6.794989  
H -5.153934 3.833478 5.519028  
H -3.810123 5.855606 6.138410  
H 1.101013 1.634929 3.928849  
H 1.004306 2.208285 5.600124  
H -0.429544 2.278968 4.553747  
H 0.700222 4.687558 6.075492  
H -4.486251 5.845658 -1.427415  
H -4.459395 5.414530 0.291331  
H -2.970344 4.037411 -2.970984  
H -0.248993 2.873341 -0.002065  
H -0.832131 2.384546 -3.435406  
H -3.869269 9.072986 3.125389  
H -10.385666 -0.795172 -2.474604  
H 2.828692 0.329878 -7.246660  
H 5.945224 -0.140947 -4.136211  
H 3.548955 3.669575 -3.477229  
H 2.778902 -7.864715 1.444698  
H -0.296503 -8.529195 6.685179  
H 0.871479 5.853451 4.746933  
H -3.956852 -5.725545 5.078615  
H -1.820764 4.637179 1.042956  
H -0.955905 1.110386 -4.272776  
H -0.962192 -7.205502 5.714188  
H -1.375305 4.980913 3.956028  
H 0.965687 -0.537703 -4.284573  
H 3.443240 0.219611 -2.825790  
H 3.499288 -4.203228 0.448307  
C 0.984236 -0.166333 -0.016244  
C 1.104994 -0.231387 1.520951  
H 0.486987 0.584754 1.935466  
H 1.599037 -0.945884 -0.464668  
C 5.241768 0.483985 2.664299  
C 4.744733 -0.818483 2.584198  
C 4.393184 1.560187 2.393119  
C 3.411048 -1.039959 2.233228  
H 5.396226 -1.663543 2.791174  
C 3.060696 1.335712 2.039502  
H 4.767492 2.578419 2.460838  
C 2.554661 0.029491 1.950546  
H 3.015738 -2.047174 2.173746  
H 2.406401 2.181788 1.847761  
H -0.055965 -0.318482 -0.314316  
H -3.393580 6.679627 -0.311194  
H -3.352925 7.754876 4.185551  
H -3.439261 5.370545 4.471808  
H -8.815612 -0.304515 -3.124020  
H -2.076799 -3.067843 -7.314286  
H 2.154564 3.889739 4.205203  
H -3.673823 2.948470 5.117448  
O 0.653356 3.963759 2.765834  
H 0.497253 4.920257 2.572760  
H -9.412722 -3.010847 -1.773360  
C -7.126646 -4.158616 -2.878042  
H -6.051056 -4.364742 -2.905054  
H -7.575690 -4.836472 -2.141210  
H -7.542757 -4.412899 -3.859557  
C -6.772746 -2.343409 -1.158691  
H -6.895061 -1.285797 -0.906722  
H -7.227678 -2.934188 -0.353607  
H -5.698609 -2.557805 -1.160832  
H 1.650545 -7.097892 7.345692  
C 2.359465 -2.861403 5.960880

H 2.870493 -2.052632 6.487698  
H 3.008683 -3.224849 5.160141  
H 1.426947 -2.481076 5.536445  
S 2.042706 -4.180552 7.190032  
H 6.278230 0.659509 2.939651

**TS2-S-SO-C2-r3**

C 2.370400 0.008300 -6.279400  
C 1.334510 -1.122015 -6.232378  
O 0.929240 -1.668277 -7.265340  
N 0.911260 -1.467886 -4.988141  
C -0.084500 -2.505100 -4.754300  
C -1.497499 -1.896568 -4.695057  
O -1.715583 -0.893593 -3.990220  
C 0.221706 -3.259317 -3.436493  
C -0.685904 -4.449997 -3.207218  
C -0.364864 -5.706280 -3.743683  
C -1.873506 -4.322862 -2.472697  
C -1.208773 -6.803128 -3.558048  
C -2.719659 -5.417471 -2.284099  
C -2.391743 -6.661049 -2.828921  
N -2.492509 -2.482593 -5.397174  
C -2.436400 -3.709000 -6.237700  
C -3.915658 -4.034786 -6.482063  
C -4.596518 -2.657540 -6.465498  
C -3.851771 -1.911770 -5.352755  
C 3.510200 2.784200 -2.803900  
C 4.665469 1.800924 -3.080548  
O 5.763417 2.243791 -3.445023  
C 2.022901 2.393959 -3.040606  
C 1.405929 1.103354 -2.439293  
O 1.224755 1.219336 -1.041547  
O 1.815235 -0.034156 -2.858068  
N 4.456910 0.487596 -2.822369  
C 5.483400 -0.511400 -3.097500  
C 4.948342 -1.956490 -3.056002  
C 4.928207 -2.606091 -1.701033  
C 3.831584 -2.979144 -0.959149  
C 6.083623 -3.016584 -0.938460  
C 5.601741 -3.628898 0.256532  
C 7.473772 -2.948051 -1.148255  
N 4.229002 -3.589239 0.211786  
C 6.464516 -4.156428 1.225150  
C 8.332999 -3.471181 -0.187816  
C 7.832594 -4.068012 0.989013  
C -3.276200 -4.740300 5.067400  
C -2.656879 -4.655448 3.814483  
C -3.143442 -3.664303 5.952205  
C -1.917175 -3.528999 3.440134  
C -2.410849 -2.533054 5.594426  
C -1.789051 -2.453327 4.335315  
O -1.086366 -1.325415 4.061549  
C -0.019700 -7.345900 6.479900  
C 0.448656 -6.255776 7.450420  
C 0.736564 -4.935337 6.732436  
C -9.259400 -1.248600 -2.470900  
C -8.870467 -2.722536 -2.628604  
C -7.357069 -3.007981 -2.559328  
C 2.343700 -6.848300 1.624100  
C 2.345494 -5.741459 2.481003  
C 1.680978 -6.727343 0.394783  
C 1.712249 -4.544319 2.130451  
C 1.047000 -5.546107 0.029760

|   |           |           |           |   |            |           |           |
|---|-----------|-----------|-----------|---|------------|-----------|-----------|
| C | 1.031950  | -4.394910 | 0.879872  | H | 1.663104   | -7.571579 | -0.292923 |
| O | 0.437943  | -3.298269 | 0.506079  | H | 2.851061   | -5.806400 | 3.443580  |
| C | -3.616300 | 8.136500  | 2.657900  | H | 0.539328   | -5.467529 | -0.926459 |
| C | -2.173019 | 8.277572  | 2.177276  | H | 1.721404   | -3.699797 | 2.815516  |
| C | -1.440703 | 6.936633  | 2.057632  | H | 0.329620   | -1.955032 | 1.213002  |
| O | -2.180364 | 5.893302  | 2.013991  | H | -2.143944  | 8.751874  | 1.186087  |
| O | -0.185785 | 6.939963  | 2.007475  | H | -1.589163  | 8.929664  | 2.836223  |
| C | -3.545700 | 5.263700  | 5.189400  | H | -4.179058  | 7.468795  | 2.003223  |
| C | -2.066926 | 5.206302  | 5.610954  | H | -4.215944  | 4.161315  | 6.938544  |
| O | -1.744822 | 5.294051  | 6.802939  | H | -5.419202  | 4.231664  | 5.634316  |
| C | -4.351600 | 4.133200  | 5.854000  | H | -3.929843  | 6.232201  | 5.530456  |
| N | -1.175713 | 5.040611  | 4.603269  | H | 1.334984   | 2.042606  | 3.479959  |
| C | 0.276000  | 5.109600  | 4.768300  | H | 1.182181   | 2.485123  | 5.187804  |
| C | 1.005479  | 4.152643  | 3.811419  | H | -0.261655  | 2.428523  | 4.153358  |
| C | 0.801106  | 2.687791  | 4.181405  | H | 0.514164   | 4.870619  | 5.807546  |
| C | -3.935000 | 5.574300  | -0.921400 | H | -4.588593  | 5.552180  | -1.796744 |
| C | -2.877596 | 4.527155  | -1.044743 | H | -4.551120  | 5.420584  | -0.029557 |
| C | -2.587545 | 3.626758  | -2.040220 | H | -3.093012  | 3.464636  | -2.980795 |
| N | -1.923666 | 4.318426  | -0.068717 | H | -0.245872  | 2.993768  | 0.077135  |
| C | -1.102299 | 3.338963  | -0.480307 | H | -0.812589  | 1.990780  | -2.398831 |
| N | -1.478729 | 2.890928  | -1.674961 | H | -4.120207  | 9.110157  | 2.677934  |
| O | -0.158937 | 1.300886  | -3.055505 | H | -10.338783 | -1.112256 | -2.596610 |
| O | 0.053847  | -1.043852 | 1.608410  | H | 3.193920   | -0.302011 | -6.927616 |
| H | 2.750547  | 0.270234  | -5.292066 | H | 5.908098   | -0.308317 | -4.089538 |
| H | 1.907491  | 0.890208  | -6.733747 | H | 3.722848   | 3.666823  | -3.411462 |
| H | 1.264193  | -3.589175 | -3.487812 | H | 2.841959   | -7.771595 | 1.904480  |
| H | 0.143950  | -2.558233 | -2.600742 | H | -0.218608  | -8.283523 | 7.009142  |
| H | 0.559367  | -5.825961 | -4.303928 | H | 0.614346   | 6.136023  | 4.571935  |
| H | -2.126376 | -3.361709 | -2.034153 | H | -3.849637  | -5.619771 | 5.343129  |
| H | -0.938557 | -7.768735 | -3.976187 | H | -1.873845  | 4.855785  | 0.836182  |
| H | -3.627613 | -5.301078 | -1.699140 | H | -0.564275  | 0.423124  | -3.236637 |
| H | -3.046136 | -7.514506 | -2.676987 | H | -0.939724  | -7.045600 | 5.967115  |
| H | -0.015568 | -3.198047 | -5.595270 | H | -1.519831  | 5.085945  | 3.643679  |
| H | -4.063761 | -4.582954 | -7.415885 | H | 1.235759   | -0.911580 | -4.182173 |
| H | -4.296788 | -4.652865 | -5.661924 | H | 3.486516   | 0.160338  | -2.724551 |
| H | -4.445550 | -2.149384 | -7.424536 | H | 3.589827   | -3.962641 | 0.907016  |
| H | -5.671938 | -2.711337 | -6.278510 | C | 0.752132   | 0.000933  | -0.421840 |
| H | -3.807491 | -0.830023 | -5.497290 | C | 0.872669   | 0.015022  | 1.112871  |
| H | -4.299616 | -2.096069 | -4.367858 | H | 0.421238   | 0.945214  | 1.485493  |
| H | -1.912473 | -4.514284 | -5.721825 | H | 1.300318   | -0.849736 | -0.827259 |
| H | 1.851841  | 2.294911  | -4.115284 | C | 4.880211   | -0.197435 | 2.798713  |
| H | 1.417602  | 3.242437  | -2.706892 | C | 3.767170   | -0.615011 | 3.532209  |
| H | 3.635186  | 3.094686  | -1.757642 | C | 4.700693   | 0.286296  | 1.502828  |
| H | 5.593818  | -2.548725 | -3.718391 | C | 2.491594   | -0.553573 | 2.970408  |
| H | 3.949579  | -1.986915 | -3.505862 | H | 3.892259   | -0.991006 | 4.544161  |
| H | 2.777805  | -2.862799 | -1.168188 | C | 3.422045   | 0.354118  | 0.942861  |
| H | 7.874542  | -2.494091 | -2.050802 | H | 5.557369   | 0.609496  | 0.917981  |
| H | 9.407281  | -3.420741 | -0.343032 | C | 2.298719   | -0.069283 | 1.666358  |
| H | 6.075429  | -4.621346 | 2.126270  | H | 1.630827   | -0.887341 | 3.539784  |
| H | 8.527517  | -4.467348 | 1.722550  | H | 3.301954   | 0.736902  | -0.062664 |
| H | 6.312060  | -0.399232 | -2.387628 | H | -0.310118  | -0.127583 | -0.659225 |
| H | -2.744977 | -5.479186 | 3.110800  | H | -3.499618  | 6.576307  | -0.845934 |
| H | -3.615689 | -3.701731 | 6.930492  | H | -3.656336  | 7.719361  | 3.666830  |
| H | -1.434103 | -3.481342 | 2.466995  | H | -3.641017  | 5.233758  | 4.101262  |
| H | -2.310856 | -1.693681 | 6.275969  | H | -8.756997  | -0.625728 | -3.220241 |
| H | -0.718666 | -1.296620 | 3.139109  | H | -1.909677  | -3.490912 | -7.174638 |
| H | -0.317969 | -6.091975 | 8.217944  | H | 1.351396   | -6.590005 | 7.976615  |
| H | 1.529477  | -5.068155 | 5.988171  | S | 1.273155   | -3.646765 | 7.932501  |
| H | -0.158010 | -4.573564 | 6.215967  | C | 1.569285   | -2.251045 | 6.788740  |
| H | 0.736849  | -7.546586 | 5.713435  | H | 1.873823   | -1.396565 | 7.396647  |
| H | -9.248450 | -3.087267 | -3.593363 | H | 2.370880   | -2.491493 | 6.085784  |
| H | -6.867652 | -2.381296 | -3.321239 | H | 0.662282   | -1.993829 | 6.237275  |
| H | -8.992999 | -0.857742 | -1.484022 | H | 2.080733   | 4.388636  | 3.907058  |

O 0.583901 4.324045 2.462268  
H -9.378766 -3.320887 -1.858440  
C -7.069373 -4.476306 -2.905311  
H -7.463081 -4.738989 -3.893796  
H -5.993301 -4.681991 -2.905968  
H -7.534600 -5.148241 -2.173160  
C -6.752558 -2.647020 -1.194271  
H -6.879749 -1.587371 -0.953342  
H -7.224485 -3.231111 -0.394117  
H -5.678721 -2.861723 -1.171805  
H -4.021699 3.152688 5.495387  
H 0.418413 5.281612 2.274738  
H 5.874951 -0.250443 3.232244

**Int2-S-SO-C2-r3**

C 2.402201 0.026000 -6.263301  
C 1.340504 -1.082681 -6.220264  
O 0.898509 -1.589414 -7.260143  
N 0.943762 -1.457673 -4.976928  
C -0.072300 -2.480597 -4.758901  
C -1.476134 -1.851491 -4.719237  
O -1.682994 -0.837660 -4.028088  
C 0.206228 -3.235218 -3.435080  
C -0.709912 -4.421538 -3.218819  
C -0.388234 -5.678122 -3.754391  
C -1.905047 -4.291698 -2.497165  
C -1.238357 -6.772074 -3.580789  
C -2.757474 -5.383464 -2.320198  
C -2.428673 -6.627126 -2.864237  
N -2.475220 -2.431505 -5.422346  
C -2.427200 -3.662102 -6.255500  
C -3.908060 -3.967665 -6.515834  
C -4.568727 -2.580444 -6.514666  
C -3.824957 -1.838815 -5.398252  
C 3.548899 2.776104 -2.769503  
C 4.706349 1.786962 -3.028219  
O 5.822158 2.230718 -3.342577  
C 2.072129 2.403782 -3.073273  
C 1.368556 1.119166 -2.523902  
O 1.251923 1.243704 -1.058860  
O 1.874698 -0.036310 -2.891042  
N 4.472083 0.471878 -2.816416  
C 5.502899 -0.529800 -3.075398  
C 4.953246 -1.971043 -3.091352  
C 4.908992 -2.665339 -1.759279  
C 3.800958 -3.014736 -1.023019  
C 6.048880 -3.146984 -1.015539  
C 5.546755 -3.776180 0.162310  
C 7.439697 -3.128726 -1.230484  
N 4.176883 -3.677357 0.126566  
C 6.390896 -4.370842 1.108214  
C 8.280560 -3.718248 -0.292404  
C 7.760492 -4.332357 0.866989  
C -3.305697 -4.749393 5.041397  
C -2.683019 -4.668923 3.789586  
C -3.179646 -3.667112 5.919608  
C -1.947076 -3.541620 3.409622  
C -2.450911 -2.534886 5.556485  
C -1.825998 -2.459925 4.298515  
O -1.127575 -1.329907 4.020760  
C -0.069101 -7.382404 6.448998  
C 0.422900 -6.293003 7.408650  
C 0.695354 -4.972968 6.683914

C -9.245900 -1.180599 -2.494700  
C -8.860528 -2.655153 -2.655166  
C -7.347310 -2.943302 -2.594455  
C 2.311204 -6.872912 1.602708  
C 2.334517 -5.762091 2.454537  
C 1.615168 -6.757260 0.391114  
C 1.689987 -4.567310 2.116517  
C 0.968385 -5.578965 0.039232  
C 0.973568 -4.423087 0.884765  
O 0.364506 -3.331556 0.525893  
C -3.560700 8.142100 2.701000  
C -2.085521 8.295272 2.337283  
C -1.371636 6.959462 2.118090  
O -2.129034 5.927573 2.025635  
O -0.120461 6.946398 2.043779  
C -3.514800 5.255200 5.217000  
C -2.038297 5.195236 5.643523  
O -1.718529 5.280437 6.835689  
C -4.322100 4.118700 5.869200  
N -1.144577 5.028494 4.637965  
C 0.307100 5.080200 4.805899  
C 1.022638 4.122973 3.837240  
C 0.804857 2.657449 4.194806  
C -3.884604 5.601305 -0.893099  
C -2.801061 4.578987 -0.998810  
C -2.493168 3.686437 -1.991336  
N -1.850180 4.395928 -0.009937  
C -1.000112 3.441483 -0.390053  
N -1.372324 2.990888 -1.589485  
O -0.006055 1.274498 -3.047220  
O 0.025391 -1.025543 1.567860  
H 2.765833 0.292346 -5.271148  
H 1.967282 0.908831 -6.742516  
H 1.247724 -3.570523 -3.468308  
H 0.119396 -2.531469 -2.602537  
H 0.541792 -5.800219 -4.304423  
H -2.158707 -3.330679 -2.058662  
H -0.967248 -7.737791 -3.998168  
H -3.671034 -5.264997 -1.744396  
H -3.087980 -7.478377 -2.721257  
H -0.004035 -3.177972 -5.596735  
H -4.053515 -4.518735 -7.448413  
H -4.308077 -4.575603 -5.697037  
H -4.399802 -2.080360 -7.474995  
H -5.646900 -2.617326 -6.339429  
H -3.761586 -0.758956 -5.550405  
H -4.288424 -2.007892 -4.417672  
H -1.921157 -4.472541 -5.729923  
H 1.948787 2.319948 -4.157593  
H 1.467359 3.265395 -2.767667  
H 3.635798 3.056190 -1.710577  
H 5.600872 -2.549648 -3.763597  
H 3.960164 -1.974678 -3.553658  
H 2.753099 -2.843868 -1.223404  
H 7.854378 -2.661184 -2.119786  
H 9.355433 -3.707045 -0.451569  
H 5.986382 -4.848573 1.995752  
H 8.441202 -4.784559 1.583030  
H 6.304798 -0.444648 -2.331020  
H -2.765069 -5.497488 3.090800  
H -3.654001 -3.700283 6.897068  
H -1.460042 -3.498402 2.437925  
H -2.356135 -1.691106 6.233387

H -0.754948 -1.301538 3.100461  
H -0.325266 -6.128525 8.194058  
H 1.467781 -5.107652 5.918773  
H -0.211414 -4.608793 6.191028  
H 0.670001 -7.584362 5.666080  
H -9.244498 -3.018756 -3.617970  
H -6.861090 -2.317359 -3.359035  
H -8.973799 -0.790686 -1.508966  
H 1.580787 -7.603970 -0.293024  
H 2.866956 -5.821908 3.402947  
H 0.435204 -5.504889 -0.903493  
H 1.718457 -3.719122 2.796525  
H 0.295908 -1.938834 1.188377  
H -1.972836 8.877741 1.412494  
H -1.536279 8.852105 3.104991  
H -4.093682 7.574063 1.935968  
H -4.192284 4.139419 6.954590  
H -5.388612 4.217247 5.644616  
H -3.901494 6.220555 5.563771  
H 1.328503 2.012598 3.485439  
H 1.189019 2.442888 5.197398  
H -0.260578 2.409106 4.170589  
H 0.541863 4.826979 5.842412  
H -4.529805 5.555667 -1.772930  
H -4.500155 5.437097 -0.003488  
H -2.973589 3.496183 -2.937538  
H -0.140268 3.104768 0.166876  
H -0.857598 2.250765 -2.149932  
H -4.041662 9.122393 2.800880  
H -10.325654 -1.042134 -2.614852  
H 3.232121 -0.312027 -6.890015  
H 5.969531 -0.306259 -4.044284  
H 3.796896 3.672846 -3.342990  
H 2.818985 -7.794105 1.872746  
H -0.258060 -8.319608 6.982619  
H 0.658567 6.104355 4.620814  
H -3.875852 -5.629755 5.321043  
H -1.825759 4.954872 0.908089  
H -0.377954 0.393254 -3.261323  
H -0.999590 -7.080303 5.956549  
H -1.485300 5.069970 3.678784  
H 1.287248 -0.912121 -4.156748  
H 3.478616 0.160063 -2.751944  
H 3.527191 -4.039041 0.818444  
C 0.737439 0.045019 -0.457366  
C 0.863723 0.024477 1.078140  
H 0.430624 0.955743 1.470544  
H 1.252009 -0.822948 -0.875449  
C 4.870613 -0.284909 2.749494  
C 3.750164 -0.667510 3.491031  
C 4.697785 0.194382 1.450904  
C 2.474141 -0.575249 2.934247  
H 3.869951 -1.040098 4.504989  
C 3.419012 0.293544 0.895541  
H 5.560288 0.489778 0.859668  
C 2.288328 -0.094109 1.627712  
H 1.607422 -0.883689 3.509247  
H 3.299222 0.672530 -0.111601  
H -0.333099 -0.057022 -0.682487  
H -3.469721 6.611647 -0.822177  
H -3.681234 7.612516 3.647922  
H -3.606913 5.231632 4.128300  
H -8.746178 -0.558309 -3.246346

H -1.886280 -3.456698 -7.187335  
H 2.100252 4.347693 3.924597  
O 0.591259 4.310573 2.491273  
H 0.466018 5.273251 2.304434  
H 1.337422 -6.628421 7.913278  
C 1.545638 -2.293593 6.718408  
H 0.627514 -2.029265 6.189184  
H 1.871913 -1.441370 7.318166  
H 2.327573 -2.540680 5.995934  
S 1.267005 -3.686462 7.869969  
H -3.988649 3.141390 5.505357  
H -9.365683 -3.252879 -1.882466  
C -7.064245 -4.412042 -2.942396  
H -5.988609 -4.619597 -2.949635  
H -7.526282 -5.083300 -2.207607  
H -7.464338 -4.673771 -3.928561  
C -6.734571 -2.583665 -1.232732  
H -6.859009 -1.523880 -0.990767  
H -7.202824 -3.167292 -0.430102  
H -5.660971 -2.799991 -1.216408  
H 5.865669 -0.361825 3.178979

**TS3-S-SO-C2-r3**

C 2.527024 -0.231255 -6.179476  
C 1.483833 -1.355183 -6.120054  
O 1.058126 -1.895180 -7.148010  
N 1.075128 -1.704249 -4.871146  
C 0.026953 -2.687030 -4.633749  
C -1.361690 -2.024512 -4.695073  
O -1.564098 -0.945130 -4.108595  
C 0.241909 -3.362594 -3.256523  
C -0.726788 -4.491642 -2.975983  
C -0.502221 -5.775118 -3.497474  
C -1.871274 -4.280362 -2.195831  
C -1.400398 -6.816751 -3.255197  
C -2.771294 -5.319284 -1.950063  
C -2.541363 -6.590323 -2.481876  
N -2.354749 -2.646768 -5.368393  
C -2.299414 -3.922932 -6.130220  
C -3.774592 -4.212959 -6.436453  
C -4.402575 -2.814634 -6.543346  
C -3.689966 -2.024178 -5.440389  
C 3.607730 2.641126 -2.764085  
C 4.754684 1.641588 -3.019050  
O 5.851983 2.059172 -3.415076  
C 2.154923 2.400364 -3.250919  
C 1.327255 1.146791 -2.889338  
O 0.828192 1.419653 -1.163762  
O 1.875412 -0.004787 -2.898015  
N 4.541901 0.344434 -2.689205  
C 5.569186 -0.670889 -2.918092  
C 5.019850 -2.108340 -2.835833  
C 4.963415 -2.707131 -1.458682  
C 3.847945 -3.018489 -0.716107  
C 6.098317 -3.122781 -0.668531  
C 5.586146 -3.676372 0.542513  
C 7.491872 -3.102636 -0.864723  
N 4.216111 -3.593756 0.482045  
C 6.422800 -4.194802 1.538442  
C 8.325380 -3.616451 0.123244  
C 7.795407 -4.156159 1.314554  
C -3.383688 -4.614687 5.179606  
C -2.696293 -4.673530 3.961144

|   |           |           |           |   |            |           |           |
|---|-----------|-----------|-----------|---|------------|-----------|-----------|
| C | -3.471848 | -3.383518 | 5.839031  | H | 9.402243   | -3.603195 | -0.021567 |
| C | -2.104953 | -3.536723 | 3.402741  | H | 6.010711   | -4.615281 | 2.451174  |
| C | -2.888577 | -2.239752 | 5.294734  | H | 8.470465   | -4.549842 | 2.069421  |
| C | -2.198625 | -2.302950 | 4.070116  | H | 6.387158   | -0.540513 | -2.198995 |
| O | -1.657941 | -1.154423 | 3.599991  | H | -2.613265  | -5.619129 | 3.431707  |
| C | -0.171717 | -7.192520 | 6.737709  | H | -4.002193  | -3.308974 | 6.784939  |
| C | 0.340252  | -6.084271 | 7.664519  | H | -1.569756  | -3.597854 | 2.458479  |
| C | 0.380071  | -4.726565 | 6.959963  | H | -2.961542  | -1.280639 | 5.798812  |
| C | -9.187162 | -1.320160 | -2.584397 | H | -1.212561  | -1.254923 | 2.712471  |
| C | -8.753844 | -2.752234 | -2.916063 | H | -0.304300  | -6.016026 | 8.549652  |
| C | -7.288705 | -3.086488 | -2.571496 | H | 1.044882   | -4.764954 | 6.090096  |
| C | 2.296610  | -6.850183 | 1.920693  | H | -0.618446  | -4.446236 | 6.609996  |
| C | 2.189586  | -5.693008 | 2.702484  | H | 0.471987   | -7.301878 | 5.858109  |
| C | 1.759929  | -6.814980 | 0.625438  | H | -8.905976  | -2.928245 | -3.989463 |
| C | 1.576501  | -4.532692 | 2.216124  | H | -6.652340  | -2.347144 | -3.082252 |
| C | 1.147586  | -5.672283 | 0.125167  | H | -9.153142  | -1.119611 | -1.509092 |
| C | 1.023346  | -4.469130 | 0.894995  | H | 1.826707   | -7.698536 | -0.008172 |
| O | 0.460250  | -3.409355 | 0.396193  | H | 2.595638   | -5.687297 | 3.713428  |
| C | -3.604303 | 8.186406  | 2.384012  | H | 0.739869   | -5.665962 | -0.881101 |
| C | -2.222328 | 8.762629  | 2.703877  | H | 1.503233   | -3.648222 | 2.845106  |
| C | -1.089310 | 8.054790  | 1.949261  | H | 0.079824   | -1.986983 | 0.964578  |
| O | -1.163042 | 6.750526  | 1.975770  | H | -2.175935  | 9.833273  | 2.483333  |
| O | -0.197236 | 8.705750  | 1.399609  | H | -2.018714  | 8.644262  | 3.777372  |
| C | -3.602598 | 5.389593  | 5.000191  | H | -3.864243  | 8.352800  | 1.332049  |
| C | -2.143834 | 5.077826  | 5.381221  | H | -4.412871  | 4.256577  | 6.662665  |
| O | -1.870167 | 4.567649  | 6.473830  | H | -5.603317  | 4.619642  | 5.392513  |
| C | -4.562002 | 4.343405  | 5.584408  | H | -3.843238  | 6.384207  | 5.397182  |
| N | -1.207129 | 5.406682  | 4.455789  | H | 0.827851   | 2.569437  | 2.468650  |
| C | 0.226293  | 5.205207  | 4.665401  | H | 0.208901   | 2.475534  | 4.123744  |
| C | 0.929171  | 4.442161  | 3.535425  | H | -0.764679  | 3.254756  | 2.865095  |
| C | 0.256461  | 3.105342  | 3.228746  | H | 0.330481   | 4.653400  | 5.602372  |
| C | -3.860811 | 5.520718  | -1.123999 | H | -4.503921  | 5.043930  | -1.866499 |
| C | -2.590141 | 4.734903  | -0.964642 | H | -4.411350  | 5.577824  | -0.179359 |
| C | -2.122125 | 3.597670  | -1.581068 | H | -2.572016  | 2.992928  | -2.352364 |
| N | -1.603086 | 5.095345  | -0.062012 | H | 0.287285   | 4.258951  | 0.484046  |
| C | -0.599842 | 4.211092  | -0.133289 | H | -0.170114  | 2.405466  | -1.202124 |
| N | -0.883442 | 3.288517  | -1.047585 | H | -4.384114  | 8.655201  | 2.993936  |
| O | 0.103965  | 1.282590  | -3.523095 | H | -10.212979 | -1.133516 | -2.919631 |
| O | -0.385224 | -1.123785 | 1.243852  | H | 3.324734   | -0.532593 | -6.862948 |
| H | 2.940569  | 0.011280  | -5.201185 | H | 6.007868   | -0.502088 | -3.910112 |
| H | 2.052013  | 0.661645  | -6.598626 | H | 3.946739   | 3.578843  | -3.209870 |
| H | 1.269286  | -3.741191 | -3.242913 | H | 2.778738   | -7.743506 | 2.306372  |
| H | 0.167102  | -2.608099 | -2.469263 | H | -0.199003  | -8.156661 | 7.255813  |
| H | 0.390326  | -5.960918 | -4.090516 | H | 0.725269   | 6.175816  | 4.790618  |
| H | -2.044804 | -3.300070 | -1.762588 | H | -3.842061  | -5.504438 | 5.599893  |
| H | -1.204684 | -7.804528 | -3.663054 | H | -1.582855  | 5.873056  | 0.639944  |
| H | -3.644860 | -5.139137 | -1.329850 | H | -0.326363  | 0.402364  | -3.598559 |
| H | -3.238039 | -7.400031 | -2.284754 | H | -1.183621  | -6.971549 | 6.381638  |
| H | 0.109855  | -3.436062 | -5.424321 | H | -1.477694  | 5.889629  | 3.594259  |
| H | -3.892932 | -4.813164 | -7.342154 | H | 1.371484   | -1.113899 | -4.077354 |
| H | -4.223132 | -4.765052 | -5.603263 | H | 3.557582   | 0.054670  | -2.596465 |
| H | -4.180894 | -2.375557 | -7.522492 | H | 3.556417   | -3.946829 | 1.168571  |
| H | -5.487777 | -2.818932 | -6.413837 | C | 0.311690   | 0.197971  | -0.649833 |
| H | -3.592289 | -0.957257 | -5.652418 | C | 0.364557   | 0.046886  | 0.886458  |
| H | -4.199068 | -2.124667 | -4.473189 | H | -0.191203  | 0.884278  | 1.328589  |
| H | -1.832959 | -4.713383 | -5.542029 | H | 0.871065   | -0.631174 | -1.097630 |
| H | 2.156113  | 2.383913  | -4.347842 | C | 4.267447   | -0.015948 | 2.802874  |
| H | 1.569934  | 3.281901  | -2.970621 | C | 3.107945   | -0.339594 | 3.514259  |
| H | 3.587071  | 2.803088  | -1.677628 | C | 4.167946   | 0.328041  | 1.455619  |
| H | 5.672485  | -2.731654 | -3.461745 | C | 1.867413   | -0.321473 | 2.878636  |
| H | 4.030733  | -2.144645 | -3.306848 | H | 3.171309   | -0.605629 | 4.566198  |
| H | 2.798501  | -2.878577 | -0.934821 | C | 2.922430   | 0.350258  | 0.819596  |
| H | 7.915176  | -2.692801 | -1.778106 | H | 5.060562   | 0.575290  | 0.887665  |

C 1.754939 0.024041 1.520385  
H 0.971187 -0.579428 3.434935  
H 2.857591 0.630216 -0.223733  
H -0.746302 0.067224 -0.928526  
H -3.656352 6.544498 -1.454501  
H -3.626963 7.111332 2.562823  
H -3.704411 5.447636 3.912804  
H -8.538485 -0.587517 -3.078644  
H -1.717317 -3.778193 -7.048631  
H 1.946128 4.238994 3.899384  
H -4.384598 3.358305 5.141634  
O 1.100471 5.231833 2.355981  
H 0.323000 5.824470 2.222149  
H -9.411053 -3.464551 -2.396143  
C -6.912715 -4.476415 -3.105626  
H -5.860626 -4.708255 -2.907199  
H -7.519813 -5.255826 -2.628051  
H -7.074503 -4.546696 -4.187374  
C -7.002493 -2.991713 -1.065434  
H -7.193933 -1.988982 -0.671876  
H -7.629905 -3.696841 -0.505572  
H -5.956640 -3.234645 -0.849648  
H 1.343878 -6.338497 8.027238  
C 0.900955 -1.968115 6.988143  
H -0.119017 -1.813976 6.628488  
H 1.213732 -1.096447 7.566555  
H 1.574828 -2.092751 6.136843  
S 0.985090 -3.415724 8.101631  
H 5.235667 -0.032979 3.295493

**Prod-S-SO-C2-r3**

C 2.141600 0.298600 -6.407000  
C 1.123709 -0.843662 -6.389737  
O 0.571248 -1.236557 -7.419956  
N 0.839672 -1.391005 -5.167025  
C -0.313500 -2.277700 -4.990800  
C -1.607405 -1.453769 -5.154642  
O -1.677614 -0.308609 -4.665535  
C -0.238116 -2.915676 -3.581851  
C -1.343718 -3.906884 -3.286070  
C -1.242790 -5.241387 -3.708633  
C -2.492394 -3.513873 -2.586341  
C -2.265292 -6.155635 -3.447368  
C -3.516227 -4.425682 -2.320842  
C -3.407565 -5.749024 -2.753777  
N -2.655664 -1.999232 -5.802988  
C -2.737800 -3.322400 -6.477900  
C -4.233695 -3.463547 -6.785251  
C -4.692125 -2.014843 -7.013350  
C -3.901240 -1.223767 -5.964901  
C 3.454000 2.781800 -2.774500  
C 4.300708 1.723828 -3.493214  
O 4.644447 1.902595 -4.667521  
C 2.063758 2.936593 -3.424294  
C 1.235415 1.663831 -3.484166  
O 1.058931 1.435026 -0.033813  
O 1.615320 0.569635 -3.088201  
N 4.647314 0.616718 -2.779888  
C 5.347000 -0.517700 -3.383000  
C 4.574344 -1.853702 -3.362516  
C 4.690849 -2.640734 -2.088221  
C 3.683698 -2.973498 -1.211658  
C 5.892537 -3.253408 -1.570034

C 5.530256 -3.935535 -0.370676  
C 7.230240 -3.317805 -2.003517  
N 4.183358 -3.741139 -0.180875  
C 6.459606 -4.656933 0.388285  
C 8.155849 -4.033951 -1.251680  
C 7.774164 -4.695615 -0.065431  
C -3.223300 -5.191600 4.740000  
C -2.701774 -4.918834 3.471646  
C -2.810426 -4.410637 5.824102  
C -1.778999 -3.889961 3.276976  
C -1.890194 -3.379132 5.646837  
C -1.361157 -3.110968 4.371708  
O -0.459892 -2.109734 4.259153  
C 0.023100 -7.956000 5.839200  
C 0.557033 -7.022392 6.931453  
C 1.136690 -5.733619 6.344881  
C -9.378900 -1.029600 -2.302800  
C -8.261176 -1.818382 -3.000966  
C -8.630627 -3.312023 -3.095605  
C -6.917769 -1.589276 -2.292334  
C -7.679202 -4.163050 -3.944185  
C 2.234000 -7.135400 0.955400  
C 2.224499 -6.119827 1.916388  
C 1.630150 -6.883457 -0.283495  
C 1.640598 -4.878807 1.653141  
C 1.046770 -5.653506 -0.563216  
C 1.032513 -4.592652 0.391723  
O 0.505980 -3.432889 0.100511  
C -3.373800 7.834800 3.317600  
C -2.015001 8.462908 3.629616  
C -0.845574 7.829347 2.858253  
O -0.943106 6.544557 2.682168  
O 0.101791 8.534822 2.492250  
C -3.279300 4.777600 5.622200  
C -1.809206 4.390037 5.872658  
O -1.492103 3.698114 6.847451  
C -4.243500 3.829200 6.343100  
N -0.910907 4.866385 4.974312  
C 0.522200 4.585800 5.058500  
C 1.137758 4.046128 3.757452  
C 0.355124 2.854869 3.206241  
C -3.864700 5.557400 -0.430800  
C -2.564579 4.815858 -0.445423  
C -2.118305 3.740161 -1.181583  
N -1.502897 5.147754 0.373493  
C -0.493208 4.283379 0.113932  
N -0.822678 3.409019 -0.825962  
O 0.054364 1.850232 -4.080722  
O 0.308164 -1.637306 1.817877  
H 2.865831 0.258775 -5.594515  
H 1.594033 1.244057 -6.337208  
H 0.736533 -3.407554 -3.501437  
H -0.253670 -2.113257 -2.837653  
H -0.351381 -5.566944 -4.239536  
H -2.579145 -2.488375 -2.238138  
H -2.165382 -7.185685 -3.777451  
H -4.391741 -4.104088 -1.764265  
H -4.200104 -6.460523 -2.541272  
H -0.260003 -3.050930 -5.759385  
H -4.413984 -4.116869 -7.642561  
H -4.749209 -3.890956 -5.918450  
H -4.414228 -1.685099 -8.020584  
H -5.771157 -1.882561 -6.901632



H -3.666330 -0.200830 -6.267122  
H -4.431106 -1.172885 -5.005672  
H -2.366880 -4.117425 -5.831490  
H 2.168794 3.294847 -4.454373  
H 1.474249 3.689411 -2.890821  
H 3.332942 2.546424 -1.713358  
H 4.975564 -2.456604 -4.189535  
H 3.522657 -1.666994 -3.601172  
H 2.627270 -2.742073 -1.232992  
H 7.539676 -2.820395 -2.918948  
H 9.189795 -4.087383 -1.581447  
H 6.160241 -5.171513 1.296650  
H 8.518504 -5.247357 0.501924  
H 6.315978 -0.648318 -2.887099  
H -3.013145 -5.514879 2.617675  
H -3.208432 -4.603380 6.817072  
H -1.376271 -3.687814 2.288822  
H -1.566685 -2.766698 6.483021  
H -0.184481 -1.966065 3.301339  
H -0.252694 -6.770501 7.627212  
H 1.982145 -5.957680 5.684967  
H 0.376465 -5.205956 5.760893  
H 0.811747 -8.229874 5.129744  
H -8.170659 -1.434795 -4.029082  
H -6.089457 -2.087864 -2.805020  
H -6.677994 -0.521733 -2.241359  
H -6.951363 -1.969957 -1.263751  
H -8.687373 -3.727795 -2.079131  
H -9.643507 -3.393194 -3.512732  
H -7.596723 -3.764476 -4.962557  
H -6.670707 -4.200991 -3.520504  
H -8.039529 -5.194354 -4.021648  
H -9.513532 -1.375118 -1.270285  
H 1.619816 -7.661386 -1.045305  
H 2.678782 -6.293812 2.890601  
H 0.579393 -5.471755 -1.526563  
H 1.629453 -4.106209 2.416096  
H 0.478220 -2.391130 1.102947  
H -2.016816 9.539808 3.433422  
H -1.791799 8.340402 4.699414  
H -3.649836 7.995993 2.269019  
H -4.018367 3.795107 7.411121  
H -5.279254 4.157350 6.211297  
H -3.421799 5.806582 5.976906  
H 0.822511 2.483063 2.292665  
H 0.319762 2.043011 3.942331  
H -0.675075 3.138704 2.971082  
H 0.648755 3.854038 5.859669  
H -4.561711 5.103429 -1.139652  
H -4.332087 5.537381 0.560620  
H -2.654062 3.190873 -1.943889  
H 0.440371 4.321145 0.657534  
H 0.338181 1.957945 -0.450535  
H -4.166674 8.269223 3.937088  
H -10.336914 -1.149173 -2.821194  
H 2.662080 0.281428 -7.365941  
H 5.544505 -0.217104 -4.413795  
H 3.982214 3.735545 -2.855336  
H 2.692700 -8.097018 1.166673  
H -0.373219 -8.880141 6.272617  
H 1.067351 5.495215 5.345852  
H -3.941991 -5.993548 4.879449  
H -1.461232 5.833839 1.144286

H -0.442758 0.994078 -4.159122  
H -0.782903 -7.476892 5.273265  
H -1.211703 5.469047 4.202934  
H 1.152899 -0.883041 -4.340707  
H 4.206244 0.473845 -1.881919  
H 3.610076 -4.149576 0.549359  
C 0.638520 0.088180 0.151641  
C 1.005848 -0.427106 1.556725  
H 0.604930 0.306313 2.266779  
H 1.086204 -0.562441 -0.613124  
C 5.249298 -0.777684 2.482110  
C 4.291891 -1.485913 3.212223  
C 4.833792 0.051411 1.439786  
C 2.938219 -1.372242 2.893938  
H 4.599611 -2.129155 4.032600  
C 3.476828 0.165388 1.124034  
H 5.565917 0.614666 0.866936  
C 2.507153 -0.552409 1.839856  
H 2.199976 -1.921440 3.468307  
H 3.157631 0.834575 0.333135  
H -0.451459 -0.001956 0.063529  
H -3.737688 6.609818 -0.711101  
H -3.353912 6.758776 3.488459  
H -3.475652 4.790431 4.545076  
H -9.147824 0.040518 -2.265542  
H -2.138589 -3.303043 -7.396615  
H 2.146488 3.701391 4.025803  
O 1.341566 5.061672 2.778100  
H 0.535283 5.630787 2.707509  
H -4.156271 2.810396 5.953941  
H 1.326798 -7.537848 7.519236  
S 1.717126 -4.606927 7.679066  
C 2.257798 -3.179857 6.670318  
H 2.596514 -2.406596 7.363006  
H 3.088848 -3.460668 6.018148  
H 1.431776 -2.789727 6.070772  
H 6.304148 -0.868215 2.725626

**RC-R-SO-r1**

C 3.151297 1.132602 -5.875500  
C 2.211980 -0.071135 -5.862605  
O 1.947105 -0.689343 -6.899386  
N 1.674273 -0.409589 -4.653173  
C 0.662802 -1.461803 -4.554505  
C -0.744429 -0.832036 -4.639081  
O -0.990784 0.206212 -4.002315  
C 0.833725 -2.230740 -3.219503  
C -0.045559 -3.457546 -3.104406  
C 0.372346 -4.684654 -3.642681  
C -1.295510 -3.398568 -2.472084  
C -0.437310 -5.819496 -3.559968  
C -2.107989 -4.531185 -2.387440  
C -1.683462 -5.744985 -2.932657  
N -1.695152 -1.423090 -5.391838  
C -1.587000 -2.658704 -6.193896  
C -3.041299 -2.953459 -6.586659  
C -3.675725 -1.556736 -6.677680  
C -3.027565 -0.801136 -5.511857  
C 4.059002 3.823499 -2.268000  
C 5.256587 2.871637 -2.412637  
O 6.404243 3.322963 -2.518169  
C 2.664560 3.264007 -2.595424  
C 2.203576 2.192787 -1.583247

|   |           |           |           |   |           |           |           |
|---|-----------|-----------|-----------|---|-----------|-----------|-----------|
| O | 1.974335  | 2.579227  | -0.414224 | H | -2.313700 | -6.626796 | -2.861701 |
| O | 2.143823  | 0.976184  | -1.992792 | H | 0.831278  | -2.132832 | -5.397856 |
| N | 5.014364  | 1.533715  | -2.400517 | H | -3.107367 | -3.523785 | -7.516579 |
| C | 6.101000  | 0.569301  | -2.548700 | H | -3.525915 | -3.536408 | -5.795688 |
| C | 5.583640  | -0.861245 | -2.788748 | H | -3.407830 | -1.081795 | -7.627973 |
| C | 5.312921  | -1.647147 | -1.537704 | H | -4.766171 | -1.572444 | -6.604849 |
| C | 4.152154  | -1.687777 | -0.802027 | H | -2.922387 | 0.272586  | -5.681554 |
| C | 6.260436  | -2.489024 | -0.849069 | H | -3.587014 | -0.936150 | -4.577684 |
| C | 5.598261  | -3.016271 | 0.296904  | H | -1.138938 | -3.467425 | -5.615094 |
| C | 7.597808  | -2.856724 | -1.087099 | H | 2.628502  | 2.869687  | -3.611230 |
| N | 4.322021  | -2.500976 | 0.302347  | H | 1.950603  | 4.090958  | -2.550996 |
| C | 6.230637  | -3.893448 | 1.186687  | H | 4.062810  | 4.181865  | -1.230669 |
| C | 8.230149  | -3.724387 | -0.203823 | H | 6.339265  | -1.392461 | -3.378742 |
| C | 7.552002  | -4.238428 | 0.922114  | H | 4.687101  | -0.817524 | -3.418595 |
| C | -3.002903 | -4.031009 | 5.017004  | H | 3.220305  | -1.165005 | -0.975266 |
| C | -2.549308 | -3.638689 | 3.757828  | H | 8.131839  | -2.467301 | -1.949921 |
| C | -2.399655 | -3.492099 | 6.157879  | H | 9.262837  | -4.012678 | -0.379719 |
| C | -1.499381 | -2.729396 | 3.628901  | H | 5.704218  | -4.292456 | 2.048115  |
| C | -1.349641 | -2.582177 | 6.044486  | H | 8.070893  | -4.915867 | 1.594532  |
| C | -0.887974 | -2.201939 | 4.776083  | H | 6.752884  | 0.588261  | -1.665714 |
| O | 0.163765  | -1.334940 | 4.723674  | H | -3.010068 | -4.043160 | 2.861020  |
| C | 0.218948  | -6.625300 | 6.526579  | H | -2.748558 | -3.780364 | 7.145654  |
| C | 0.881382  | -5.658488 | 7.514500  | H | -1.152896 | -2.445405 | 2.642869  |
| C | 1.714686  | -4.594966 | 6.796473  | H | -0.873204 | -2.160695 | 6.924057  |
| C | -8.639402 | -0.415299 | -2.726899 | H | 0.362117  | -1.085446 | 3.794569  |
| C | -8.093285 | -1.683673 | -3.391482 | H | 0.108968  | -5.165406 | 8.116684  |
| C | -6.899926 | -2.337198 | -2.667157 | H | 2.535998  | -5.060489 | 6.240130  |
| C | 2.825954  | -5.950189 | 1.818813  | H | 1.090164  | -4.043116 | 6.087954  |
| C | 2.640312  | -4.825231 | 2.623267  | H | 0.964947  | -7.131574 | 5.903779  |
| C | 2.150653  | -6.030138 | 0.596288  | H | -7.784431 | -1.440337 | -4.416898 |
| C | 1.805070  | -3.780371 | 2.213458  | H | -6.117033 | -1.570592 | -2.560017 |
| C | 1.313671  | -5.000810 | 0.174227  | H | -9.049748 | -0.616975 | -1.732402 |
| C | 1.141259  | -3.862120 | 0.977217  | H | 2.282264  | -6.901031 | -0.039919 |
| O | 0.324440  | -2.882267 | 0.510050  | H | 3.145999  | -4.750416 | 3.581937  |
| C | -3.435700 | 8.903401  | 2.956901  | H | 0.795187  | -5.050865 | -0.776914 |
| C | -1.900912 | 8.946039  | 2.937397  | H | 1.657184  | -2.917421 | 2.854641  |
| C | -1.367516 | 8.045053  | 1.814610  | H | 0.387880  | -2.071671 | 1.063569  |
| O | -1.223364 | 6.790700  | 2.121486  | H | -1.561601 | 9.971140  | 2.757990  |
| O | -1.173650 | 8.533859  | 0.691245  | H | -1.506364 | 8.616691  | 3.904068  |
| C | -3.449399 | 5.960198  | 5.406499  | H | -3.840557 | 9.289225  | 2.015193  |
| C | -1.987954 | 5.788297  | 5.847262  | H | -4.180142 | 4.467308  | 6.803275  |
| O | -1.721722 | 5.466889  | 7.012976  | H | -5.332973 | 4.863313  | 5.510504  |
| C | -4.274800 | 4.707201  | 5.741301  | H | -3.851051 | 6.826935  | 5.944347  |
| N | -1.040226 | 5.997205  | 4.899258  | H | 1.330951  | 3.603569  | 2.693041  |
| C | 0.391299  | 5.877501  | 5.184703  | H | 0.694751  | 3.211953  | 4.308769  |
| C | 1.211433  | 5.310919  | 4.011890  | H | -0.327517 | 4.050570  | 3.126648  |
| C | 0.694466  | 3.960030  | 3.507582  | H | 0.490633  | 5.234409  | 6.063561  |
| C | -3.521597 | 6.441801  | -0.705101 | H | -4.264135 | 6.519204  | -1.504193 |
| C | -2.384320 | 5.582130  | -1.139276 | H | -4.024774 | 6.035380  | 0.180984  |
| C | -2.140122 | 4.862235  | -2.285263 | H | -2.770921 | 4.769354  | -3.159462 |
| N | -1.281183 | 5.372057  | -0.339843 | H | 0.506545  | 4.198383  | -0.606898 |
| C | -0.431722 | 4.555472  | -1.013704 | H | -0.219009 | 3.344274  | -3.785021 |
| N | -0.919153 | 4.222241  | -2.202512 | H | -3.844350 | 9.509818  | 3.772428  |
| O | -0.003535 | 2.877543  | -4.622487 | H | -9.440645 | 0.027741  | -3.327750 |
| O | 0.520482  | -0.632662 | 2.078868  | H | 3.760826  | 1.090910  | -6.778540 |
| H | 3.789579  | 1.175163  | -4.989940 | H | 6.720631  | 0.891301  | -3.393886 |
| H | 2.540778  | 2.042245  | -5.892059 | H | 4.291791  | 4.687780  | -2.897358 |
| H | 1.887118  | -2.521081 | -3.151436 | H | 3.479478  | -6.754657 | 2.140925  |
| H | 0.635874  | -1.540789 | -2.394205 | H | -0.351484 | -7.395409 | 7.056129  |
| H | 1.344583  | -4.750648 | -4.125322 | H | 0.811702  | 6.858638  | 5.444777  |
| H | -1.625847 | -2.462964 | -2.030263 | H | -3.820216 | -4.739395 | 5.111371  |
| H | -0.092854 | -6.760564 | -3.979564 | H | -1.133858 | 5.840871  | 0.572318  |
| H | -3.068005 | -4.467809 | -1.882708 | H | -0.213083 | 1.952800  | -4.412293 |

H -0.470497 -6.095220 5.861491  
H -1.304109 6.294450 3.952062  
H 1.822644 0.187634 -3.831030  
H 4.060216 1.183090 -2.304873  
H 3.594802 -2.754398 0.957051  
C -0.218968 0.644816 1.872457  
C 1.165313 0.508381 1.417572  
H 1.956714 0.968896 2.000455  
H -0.369578 1.141730 2.828949  
C -1.426694 0.603576 1.004250  
C -1.354861 0.621598 -0.395514  
C -2.683656 0.556448 1.627273  
C -2.525540 0.578116 -1.156597  
H -0.395586 0.694826 -0.898685  
C -3.850882 0.509937 0.867088  
H -2.743032 0.555942 2.712524  
C -3.771377 0.519200 -0.527410  
H -2.446791 0.598560 -2.238348  
H -4.817369 0.472883 1.361171  
H 1.388069 0.361329 0.367096  
H -3.171624 7.447504 -0.450285  
H -3.802064 7.881192 3.080787  
H -3.506732 6.179901 4.337153  
H -7.853717 0.340865 -2.614391  
H -0.963393 -2.477421 -7.078679  
H 2.227133 5.168361 4.405660  
O 1.351360 6.249498 2.954352  
H 0.462606 6.410387 2.565928  
H -3.926623 3.843616 5.165471  
H -8.899525 -2.425833 -3.486182  
C -6.321148 -3.482899 -3.510146  
H -6.025521 -3.135050 -4.506402  
H -5.438469 -3.923465 -3.034009  
H -7.060447 -4.282803 -3.643862  
C -7.265356 -2.834643 -1.260808  
H -7.614280 -2.023635 -0.614568  
H -8.060510 -3.589611 -1.309845  
H -6.400169 -3.295246 -0.771861  
H 1.517383 -6.215342 8.213840  
C 3.117867 -2.165239 6.819157  
H 3.546365 -1.356614 7.414935  
H 3.907927 -2.614677 6.212051  
H 2.333390 -1.762900 6.173556  
S 2.419423 -3.385109 7.990369  
H -4.679913 0.493062 -1.122887

**TS1-R-SO-C1-r1**

C 3.120891 0.102764 -5.871584  
C 2.266727 -1.160474 -5.805211  
O 2.058465 -1.847309 -6.810475  
N 1.736183 -1.474098 -4.584943  
C 0.798003 -2.587569 -4.444311  
C -0.646582 -2.068462 -4.607106  
O -0.986923 -1.010332 -4.051307  
C 0.991483 -3.280032 -3.071830  
C 0.222082 -4.575462 -2.922953  
C 0.783753 -5.789401 -3.346106  
C -1.068273 -4.592952 -2.375340  
C 0.073398 -6.986536 -3.235961  
C -1.783730 -5.786990 -2.266401  
C -1.215975 -6.988228 -2.698035  
N -1.528966 -2.777325 -5.340498  
C -1.309815 -4.051690 -6.054611

C -2.731047 -4.497518 -6.423129  
C -3.478100 -3.170064 -6.624703  
C -2.904218 -2.273232 -5.521264  
C 3.725699 3.073392 -2.422899  
C 4.990246 2.206331 -2.512699  
O 6.096561 2.747790 -2.629870  
C 2.346414 2.416972 -2.635184  
C 1.942615 1.321170 -1.617923  
O 1.521872 1.702396 -0.485487  
O 2.077695 0.111034 -1.988974  
N 4.849955 0.857011 -2.430314  
C 6.012385 -0.026699 -2.449993  
C 5.663041 -1.468909 -2.880584  
C 5.415139 -2.427811 -1.749683  
C 4.262708 -2.576142 -1.014115  
C 6.368197 -3.358645 -1.197928  
C 5.717223 -4.045336 -0.131779  
C 7.702952 -3.687328 -1.500099  
N 4.438264 -3.544155 -0.044407  
C 6.360265 -5.038124 0.618286  
C 8.345206 -4.669242 -0.755057  
C 7.678927 -5.338496 0.294160  
C -2.924804 -4.832503 5.186199  
C -2.518162 -4.595077 3.871206  
C -2.453356 -3.987563 6.197517  
C -1.649105 -3.546822 3.562300  
C -1.581918 -2.938532 5.904671  
C -1.161456 -2.714175 4.582412  
O -0.290321 -1.694719 4.365769  
C 0.439602 -7.074995 6.930198  
C 1.150531 -5.952002 7.694496  
C 1.624492 -4.838179 6.758463  
C -8.602747 -2.143713 -2.897390  
C -7.504205 -3.090962 -2.402437  
C -6.411249 -2.426847 -1.542101  
C 3.116290 -6.494891 2.249197  
C 2.972804 -5.219952 2.800272  
C 2.277262 -6.878719 1.196830  
C 2.011824 -4.331353 2.309753  
C 1.313616 -6.006787 0.697131  
C 1.170130 -4.720780 1.248987  
O 0.221483 -3.907970 0.736965  
C -4.267800 7.878902 2.296900  
C -3.023761 8.114208 1.437205  
C -1.944577 7.046094 1.664099  
O -2.333962 5.826708 1.678367  
O -0.763480 7.435304 1.831594  
C -4.127998 5.099898 4.928201  
C -2.664961 5.043100 5.405013  
O -2.400450 4.864415 6.601423  
C -5.038100 4.138300 5.701099  
N -1.711874 5.234040 4.456145  
C -0.287400 5.297795 4.798795  
C 0.694788 4.771875 3.728944  
C 0.204180 3.501232 3.026413  
C -4.069306 5.196110 -1.201800  
C -2.788450 4.540463 -1.578159  
C -2.362451 3.909253 -2.722445  
N -1.730110 4.447992 -0.700184  
C -0.732663 3.773572 -1.325730  
N -1.077625 3.429735 -2.559223  
O -0.150398 1.727429 -4.775617  
O 0.522916 -1.567961 1.775935

|   |           |           |           |                        |           |           |           |
|---|-----------|-----------|-----------|------------------------|-----------|-----------|-----------|
| H | 3.703527  | 0.268393  | -4.962605 | H                      | 6.732124  | 0.414386  | -3.146106 |
| H | 2.449591  | 0.959684  | -5.997814 | H                      | 3.864756  | 3.879153  | -3.149733 |
| H | 2.063637  | -3.469140 | -2.960811 | H                      | 3.862823  | -7.181365 | 2.636650  |
| H | 0.705161  | -2.579774 | -2.282029 | H                      | 0.112414  | -7.866822 | 7.612042  |
| H | 1.789169  | -5.795955 | -3.760167 | H                      | 0.006201  | 6.330599  | 5.032208  |
| H | -1.509385 | -3.666529 | -2.019176 | H                      | -3.601940 | -5.648620 | 5.418445  |
| H | 0.528296  | -7.916426 | -3.565590 | H                      | -1.739620 | 4.852255  | 0.248257  |
| H | -2.780234 | -5.779252 | -1.833956 | H                      | -0.343175 | 0.826977  | -4.466821 |
| H | -1.770087 | -7.918248 | -2.609004 | H                      | -0.443874 | -6.695393 | 6.406012  |
| H | 1.038016  | -3.288417 | -5.245248 | H                      | -1.990216 | 5.393573  | 3.483117  |
| H | -2.742303 | -5.143079 | -7.304911 | H                      | 1.828395  | -0.822988 | -3.800307 |
| H | -3.169561 | -5.055086 | -5.588244 | H                      | 3.923051  | 0.447946  | -2.303039 |
| H | -3.243020 | -2.750973 | -7.609347 | H                      | 3.737100  | -3.833264 | 0.625541  |
| H | -4.563915 | -3.270294 | -6.552054 | C                      | 0.412274  | 0.183761  | 0.906717  |
| H | -2.882167 | -1.212087 | -5.779018 | C                      | 1.313388  | -0.957093 | 0.771896  |
| H | -3.462395 | -2.375098 | -4.582040 | H                      | 2.351500  | -0.750521 | 1.054472  |
| H | -0.796456 | -4.776215 | -5.421681 | H                      | 0.630248  | 0.839173  | 1.741881  |
| H | 2.276914  | 1.986865  | -3.635485 | C                      | -0.925181 | 0.282805  | 0.338962  |
| H | 1.599524  | 3.211957  | -2.587311 | C                      | -1.245704 | -0.242089 | -0.924432 |
| H | 3.756378  | 3.548443  | -1.433555 | C                      | -1.927642 | 0.924184  | 1.090643  |
| H | 6.495555  | -1.850936 | -3.481409 | C                      | -2.545316 | -0.142160 | -1.412941 |
| H | 4.798912  | -1.440523 | -3.554019 | H                      | -0.469370 | -0.666700 | -1.548748 |
| H | 3.328877  | -2.039041 | -1.103521 | C                      | -3.231215 | 1.005327  | 0.608172  |
| H | 8.227273  | -3.178682 | -2.304983 | H                      | -1.681468 | 1.340467  | 2.062561  |
| H | 9.375997  | -4.927977 | -0.980892 | C                      | -3.541282 | 0.470734  | -0.645253 |
| H | 5.841605  | -5.555391 | 1.419255  | H                      | -2.759387 | -0.519685 | -2.406318 |
| H | 8.205301  | -6.103018 | 0.858784  | H                      | -3.998786 | 1.492654  | 1.201425  |
| H | 6.501348  | -0.042372 | -1.466694 | H                      | 1.282457  | -1.470803 | -0.189527 |
| H | -2.876411 | -5.233014 | 3.067542  | H                      | -3.951530 | 6.274876  | -1.047703 |
| H | -2.764299 | -4.145330 | 7.226917  | H                      | -4.022627 | 7.928870  | 3.363159  |
| H | -1.339501 | -3.387287 | 2.536591  | H                      | -4.180352 | 4.922325  | 3.849359  |
| H | -1.210567 | -2.285345 | 6.688413  | H                      | -8.176271 | -1.307121 | -3.463276 |
| H | -0.007858 | -1.626504 | 3.419259  | H                      | -0.700553 | -3.878351 | -6.950959 |
| H | 0.469599  | -5.529812 | 8.443685  | H                      | 1.605634  | 4.514427  | 4.288897  |
| H | 2.346583  | -5.226686 | 6.032090  | O                      | 1.108952  | 5.760220  | 2.803498  |
| H | 0.776716  | -4.420994 | 6.206966  | H                      | 0.332097  | 6.236350  | 2.413864  |
| H | 1.101837  | -7.528363 | 6.184324  | H                      | -4.779529 | 3.094717  | 5.493550  |
| H | -7.023416 | -3.559377 | -3.271771 | H                      | -7.957813 | -3.912282 | -1.828547 |
| H | -5.995881 | -1.590890 | -2.125543 | C                      | -6.963029 | -1.855598 | -0.227420 |
| H | -9.184235 | -1.722050 | -2.071490 | H                      | -6.165340 | -1.387722 | 0.359179  |
| H | 2.377772  | -7.867624 | 0.757425  | H                      | -7.735002 | -1.098878 | -0.398101 |
| H | 3.615396  | -4.905695 | 3.618458  | H                      | -7.404148 | -2.651343 | 0.386322  |
| H | 0.664259  | -6.296517 | -0.122536 | C                      | -5.268354 | -3.413566 | -1.260815 |
| H | 1.890825  | -3.342734 | 2.740785  | H                      | -4.840576 | -3.804585 | -2.191243 |
| H | 0.272245  | -2.988872 | 1.161715  | H                      | -4.461777 | -2.934993 | -0.695737 |
| H | -3.302518 | 8.090362  | 0.374757  | H                      | -5.626462 | -4.268489 | -0.673484 |
| H | -2.586601 | 9.098110  | 1.631646  | H                      | 2.007189  | -6.360271 | 8.244977  |
| H | -4.686197 | 6.890228  | 2.096986  | C                      | 2.779208  | -2.305661 | 6.348237  |
| H | -4.931636 | 4.300875  | 6.776166  | H                      | 1.866999  | -2.035780 | 5.810239  |
| H | -6.085747 | 4.289124  | 5.423663  | H                      | 3.206841  | -1.409809 | 6.803508  |
| H | -4.468035 | 6.131625  | 5.087498  | H                      | 3.508385  | -2.731370 | 5.654130  |
| H | 0.979309  | 3.143849  | 2.341893  | S                      | 2.415045  | -3.474493 | 7.708358  |
| H | -0.022920 | 2.708088  | 3.748896  | H                      | -4.553136 | 0.549372  | -1.032279 |
| H | -0.696999 | 3.706859  | 2.442631  |                        |           |           |           |
| H | -0.171496 | 4.716312  | 5.717669  |                        |           |           |           |
| H | -4.812476 | 5.051126  | -1.990691 | <b>Int1-R-SO-C1-r1</b> |           |           |           |
| H | -4.473421 | 4.784367  | -0.271220 | C                      | 3.541188  | 0.815695  | -5.802336 |
| H | -2.907839 | 3.766942  | -3.645858 | C                      | 2.828912  | -0.532910 | -5.717520 |
| H | 0.194510  | 3.503335  | -0.839957 | O                      | 2.849238  | -1.341847 | -6.648554 |
| H | -0.367103 | 2.293961  | -4.004188 | N                      | 2.161763  | -0.771640 | -4.550173 |
| H | -5.039381 | 8.630908  | 2.097378  | C                      | 1.289030  | -1.928893 | -4.365575 |
| H | -9.303620 | -2.666327 | -3.557133 | C                      | -0.169865 | -1.497588 | -4.636868 |
| H | 3.781174  | 0.034233  | -6.736546 | O                      | -0.600482 | -0.446753 | -4.133072 |
|   |           |           |           | C                      | 1.427357  | -2.444705 | -2.909289 |

|   |           |           |           |   |            |           |           |
|---|-----------|-----------|-----------|---|------------|-----------|-----------|
| C | 0.572927  | -3.653341 | -2.589535 | C | -4.158930  | 5.717354  | -1.785889 |
| C | 1.090169  | -4.951372 | -2.712058 | C | -2.815386  | 5.141645  | -2.080827 |
| C | -0.758489 | -3.502395 | -2.171710 | C | -2.323753  | 4.386265  | -3.121489 |
| C | 0.298577  | -6.067190 | -2.430366 | N | -1.746467  | 5.323722  | -1.232412 |
| C | -1.551964 | -4.615907 | -1.888817 | C | -0.681111  | 4.690154  | -1.774451 |
| C | -1.025791 | -5.903477 | -2.018729 | N | -0.985147  | 4.104109  | -2.924987 |
| N | -0.963807 | -2.276961 | -5.399054 | O | 0.242288   | 2.251926  | -4.868743 |
| C | -0.645215 | -3.583861 | -6.008956 | O | 2.415175   | 0.713436  | 2.352951  |
| C | -2.022172 | -4.128200 | -6.413840 | H | 4.088798   | 1.054733  | -4.887757 |
| C | -2.824800 | -2.858079 | -6.737318 | H | 2.788266   | 1.596930  | -5.955847 |
| C | -2.354563 | -1.865007 | -5.668176 | H | 2.483908   | -2.676161 | -2.747054 |
| C | 3.794281  | 3.977097  | -2.481316 | H | 1.166786   | -1.615879 | -2.242993 |
| C | 5.093511  | 3.167207  | -2.440746 | H | 2.125358   | -5.087122 | -3.013694 |
| O | 6.173350  | 3.763225  | -2.466186 | H | -1.172132  | -2.503083 | -2.068502 |
| C | 2.474771  | 3.260110  | -2.809753 | H | 0.720084   | -7.064082 | -2.525314 |
| C | 2.047341  | 2.254502  | -1.758193 | H | -2.578423  | -4.476779 | -1.561329 |
| O | 1.772956  | 2.847178  | -0.596183 | H | -1.640201  | -6.770542 | -1.793741 |
| O | 2.019741  | 1.043026  | -1.948637 | H | 1.617289   | -2.686559 | -5.077335 |
| N | 5.022107  | 1.807568  | -2.354921 | H | -1.957002  | -4.828161 | -7.250589 |
| C | 6.240502  | 1.011796  | -2.230001 | H | -2.474058  | -4.653468 | -5.565392 |
| C | 6.140349  | -0.402382 | -2.812722 | H | -2.561044  | -2.489293 | -7.734791 |
| C | 5.532790  | -1.455604 | -1.925986 | H | -3.906266  | -3.012856 | -6.710442 |
| C | 5.045581  | -1.335355 | -0.645256 | H | -2.379976  | -0.821519 | -5.990099 |
| C | 5.434422  | -2.855903 | -2.258888 | H | -2.948132  | -1.942289 | -4.748834 |
| C | 4.880163  | -3.522167 | -1.127630 | H | -0.131343  | -4.235451 | -5.299840 |
| C | 5.773886  | -3.612446 | -3.395840 | H | 2.511021   | 2.743433  | -3.767372 |
| N | 4.651109  | -2.568339 | -0.162802 | H | 1.690910   | 4.015512  | -2.898171 |
| C | 4.665696  | -4.905986 | -1.108556 | H | 3.711853   | 4.477059  | -1.509452 |
| C | 5.561715  | -4.986406 | -3.381153 | H | 7.163176   | -0.715834 | -3.064399 |
| C | 5.014431  | -5.625693 | -2.247313 | H | 5.611103   | -0.359677 | -3.773753 |
| C | -2.840902 | -3.914507 | 5.155497  | H | 4.950092   | -0.459170 | -0.021087 |
| C | -2.315376 | -3.770803 | 3.869440  | H | 6.195228   | -3.130272 | -4.273845 |
| C | -2.348494 | -3.108885 | 6.186935  | H | 5.820779   | -5.580182 | -4.253298 |
| C | -1.296232 | -2.856157 | 3.614368  | H | 4.243337   | -5.391506 | -0.234172 |
| C | -1.324557 | -2.193427 | 5.947752  | H | 4.863792   | -6.701571 | -2.263237 |
| C | -0.773564 | -2.073789 | 4.660354  | H | 6.557890   | 0.960414  | -1.179365 |
| O | 0.248651  | -1.211999 | 4.470722  | H | -2.700879  | -4.377416 | 3.053771  |
| C | 0.535403  | -5.879491 | 7.187400  | H | -2.760056  | -3.197529 | 7.189192  |
| C | 1.223394  | -4.759104 | 7.975750  | H | -0.881152  | -2.736547 | 2.620208  |
| C | 1.928399  | -3.762559 | 7.054052  | H | -0.928027  | -1.573216 | 6.746137  |
| C | -8.194092 | -1.937192 | -3.344495 | H | 0.679702   | -1.384352 | 3.569681  |
| C | -9.463164 | -1.885886 | -2.486787 | H | 0.479404   | -4.226312 | 8.580312  |
| C | -9.239066 | -2.107873 | -0.977848 | H | 2.711820   | -4.259471 | 6.471774  |
| C | 3.434398  | -5.375606 | 2.631698  | H | 1.213394   | -3.321400 | 6.354121  |
| C | 3.981754  | -4.199693 | 3.155648  | H | 1.254803   | -6.432572 | 6.573257  |
| C | 2.233250  | -5.292809 | 1.914896  | H | -10.166537 | -2.648167 | -2.848351 |
| C | 3.333978  | -2.970840 | 2.998216  | H | -8.716729  | -3.069664 | -0.859431 |
| C | 1.580179  | -4.075711 | 1.748588  | H | -7.495938  | -1.133046 | -3.092570 |
| C | 2.088563  | -2.873546 | 2.316429  | H | 1.800229   | -6.191577 | 1.480645  |
| O | 1.419559  | -1.742877 | 2.218536  | H | 4.924088   | -4.236824 | 3.698372  |
| C | -4.694420 | 8.549384  | 1.556419  | H | 0.651538   | -4.022578 | 1.187402  |
| C | -3.188729 | 8.756107  | 1.792689  | H | 3.754923   | -2.062863 | 3.423061  |
| C | -2.367209 | 7.883087  | 0.829811  | H | 2.078333   | -0.223705 | 2.343471  |
| O | -2.105342 | 6.675518  | 1.226828  | H | -2.930093  | 9.804623  | 1.613592  |
| O | -2.070196 | 8.344400  | -0.284080 | H | -2.939890  | 8.514306  | 2.830766  |
| C | -4.554204 | 5.911394  | 4.329147  | H | -4.962975  | 8.824232  | 0.531006  |
| C | -3.132473 | 5.986916  | 4.918715  | H | -5.478977  | 5.537720  | 6.254964  |
| O | -2.938870 | 5.884684  | 6.135702  | H | -6.520262  | 5.146729  | 4.867610  |
| C | -5.493886 | 5.119609  | 5.246413  | H | -4.919264  | 6.940080  | 4.215558  |
| N | -2.137085 | 6.193227  | 4.020085  | H | 0.432110   | 3.104109  | 3.642842  |
| C | -0.728355 | 6.317120  | 4.394095  | H | -0.266170  | 3.683232  | 5.166256  |
| C | 0.165267  | 5.256920  | 3.730526  | H | -1.262812  | 3.618829  | 3.699886  |
| C | -0.259346 | 3.829486  | 4.080201  | H | -0.673462  | 6.226630  | 5.480845  |

|   |            |           |           |   |           |           |           |
|---|------------|-----------|-----------|---|-----------|-----------|-----------|
| H | -4.843400  | 5.533276  | -2.618094 | C | 3.408700  | -0.051000 | -5.752200 |
| H | -4.601348  | 5.278240  | -0.883592 | C | 2.546242  | -1.315805 | -5.714169 |
| H | -2.854420  | 4.031719  | -3.994855 | O | 2.383330  | -2.008496 | -6.725816 |
| H | 0.279537   | 4.661494  | -1.283853 | N | 1.983646  | -1.609524 | -4.512058 |
| H | -0.119645  | 2.871938  | -4.199831 | C | 1.156500  | -2.795500 | -4.315300 |
| H | -5.293536  | 9.162506  | 2.238225  | C | -0.336751 | -2.443787 | -4.430584 |
| H | -8.435744  | -1.839107 | -4.408103 | O | -0.796405 | -1.457532 | -3.827792 |
| H | 4.226083   | 0.799173  | -6.650269 | C | 1.479368  | -3.437789 | -2.939743 |
| H | 7.018259   | 1.568960  | -2.755733 | C | 0.780242  | -4.758651 | -2.696444 |
| H | 3.965066   | 4.767848  | -3.216734 | C | 1.331500  | -5.955061 | -3.180895 |
| H | 3.937622   | -6.328597 | 2.765374  | C | -0.431765 | -4.820399 | -1.994415 |
| H | 0.054587   | -6.594657 | 7.863262  | C | 0.682786  | -7.175382 | -2.983187 |
| H | -0.360901  | 7.312263  | 4.112124  | C | -1.084154 | -6.039401 | -1.795212 |
| H | -3.634447  | -4.630260 | 5.349511  | C | -0.530987 | -7.220920 | -2.292994 |
| H | -1.775293  | 5.856988  | -0.342260 | N | -1.137290 | -3.235385 | -5.181009 |
| H | -0.013371  | 1.371295  | -4.545561 | C | -0.777700 | -4.450600 | -5.958700 |
| H | -0.234484  | -5.476373 | 6.521906  | C | -2.141699 | -5.045044 | -6.332447 |
| H | -2.355924  | 6.312039  | 3.022743  | C | -3.051434 | -3.812467 | -6.448926 |
| H | 2.069184   | -0.024932 | -3.866251 | C | -2.571109 | -2.911651 | -5.305376 |
| H | 4.130958   | 1.337008  | -2.262591 | C | 3.661500  | 3.110400  | -2.431700 |
| H | 4.242265   | -2.734798 | 0.750777  | C | 4.980339  | 2.316508  | -2.392562 |
| C | 1.416285   | 2.076006  | 0.624324  | O | 6.058214  | 2.926112  | -2.427305 |
| C | 2.553087   | 1.116376  | 1.010148  | C | 2.409257  | 2.458891  | -3.048535 |
| H | 3.493456   | 1.673846  | 0.885000  | C | 1.782114  | 1.279746  | -2.266010 |
| H | 1.408109   | 2.880085  | 1.363145  | O | 1.402312  | 1.806939  | -1.026302 |
| C | 0.010456   | 1.515112  | 0.527429  | O | 2.300790  | 0.111754  | -2.301212 |
| C | -0.263893  | 0.171415  | 0.246483  | N | 4.905618  | 0.964713  | -2.281184 |
| C | -1.062473  | 2.394453  | 0.738918  | C | 6.107700  | 0.145100  | -2.179700 |
| C | -1.584571  | -0.276548 | 0.169150  | C | 5.978730  | -1.260876 | -2.786021 |
| H | 0.541586   | -0.543990 | 0.140705  | C | 5.444039  | -2.340234 | -1.882753 |
| C | -2.381315  | 1.950588  | 0.643792  | C | 4.936937  | -2.232216 | -0.609008 |
| H | -0.855646  | 3.428023  | 0.998178  | C | 5.424909  | -3.748405 | -2.198563 |
| C | -2.646027  | 0.610665  | 0.354245  | C | 4.892511  | -4.430299 | -1.065205 |
| H | -1.781059  | -1.326245 | -0.027959 | C | 5.815501  | -4.501140 | -3.321641 |
| H | -3.197708  | 2.648393  | 0.805907  | N | 4.605255  | -3.479006 | -0.114509 |
| H | 2.587379   | 0.260504  | 0.330483  | C | 4.747000  | -5.822646 | -1.032037 |
| H | -4.092425  | 6.798470  | -1.622781 | C | 5.672669  | -5.884444 | -3.292533 |
| H | -4.975505  | 7.502820  | 1.707343  | C | 5.143996  | -6.537420 | -2.157792 |
| H | -4.518550  | 5.480333  | 3.323078  | C | -2.973400 | -4.781200 | 5.205700  |
| H | -7.665740  | -2.888516 | -3.210988 | C | -2.473937 | -4.719862 | 3.902380  |
| H | 0.002397   | -3.444138 | -6.883924 | C | -2.486121 | -3.886695 | 6.163854  |
| H | -9.965135  | -0.918125 | -2.631122 | C | -1.486867 | -3.799045 | 3.558804  |
| C | -10.584056 | -2.210862 | -0.243427 | C | -1.494300 | -2.963182 | 5.836072  |
| H | -11.204692 | -3.014473 | -0.655553 | C | -0.968783 | -2.924212 | 4.532438  |
| H | -10.440922 | -2.410083 | 0.824202  | O | 0.021142  | -2.049383 | 4.258799  |
| H | -11.149360 | -1.274783 | -0.332839 | C | 0.402900  | -6.746200 | 7.237600  |
| C | -8.363187  | -1.015421 | -0.346489 | C | 1.099955  | -5.600201 | 7.979996  |
| H | -7.369393  | -0.969026 | -0.801569 | C | 1.711724  | -4.586098 | 7.011743  |
| H | -8.829504  | -0.028749 | -0.461056 | C | -8.326600 | -2.803900 | -3.294300 |
| H | -8.225705  | -1.194317 | 0.725435  | C | -9.595983 | -2.755425 | -2.436867 |
| H | -5.184976  | 4.072065  | 5.316313  | C | -9.372249 | -2.981053 | -0.928417 |
| H | 1.178854   | 5.421859  | 4.124026  | C | 3.301900  | -6.242300 | 2.681900  |
| O | 0.266894   | 5.442288  | 2.314006  | C | 3.785659  | -5.012510 | 3.142165  |
| H | -0.544373  | 5.860144  | 1.960592  | C | 2.104417  | -6.257122 | 1.953837  |
| C | 3.168862   | -1.272363 | 6.658887  | C | 3.082437  | -3.826856 | 2.908012  |
| H | 2.304739   | -1.040716 | 6.031644  | C | 1.395956  | -5.084319 | 1.712265  |
| H | 3.547538   | -0.354708 | 7.114008  | C | 1.842107  | -3.825996 | 2.207229  |
| H | 3.957365   | -1.720575 | 6.049771  | O | 1.126784  | -2.735490 | 2.031577  |
| S | 2.681922   | -2.390446 | 8.023847  | C | -4.827000 | 7.682500  | 1.606500  |
| H | 1.948323   | -5.189127 | 8.678584  | C | -3.333281 | 7.968325  | 1.834775  |
| H | -3.671327  | 0.257234  | 0.288748  | C | -2.497745 | 7.115412  | 0.872845  |
|   |            |           |           | O | -2.143784 | 5.946038  | 1.312262  |
|   |            |           |           | O | -2.287059 | 7.533811  | -0.276437 |

|   |            |           |           |   |            |           |           |
|---|------------|-----------|-----------|---|------------|-----------|-----------|
| C | -4.686700  | 5.044700  | 4.379400  | H | -5.110330  | 7.933567  | 0.579279  |
| C | -3.268003  | 5.124746  | 4.976706  | H | -5.610171  | 4.671468  | 6.304948  |
| O | -3.084209  | 5.075183  | 6.198147  | H | -6.653189  | 4.279796  | 4.918978  |
| C | -5.626400  | 4.252900  | 5.296600  | H | -5.053048  | 6.072729  | 4.264488  |
| N | -2.263515  | 5.266218  | 4.076253  | H | 0.496142   | 2.269926  | 3.920557  |
| C | -0.860800  | 5.450400  | 4.444300  | H | 0.096588   | 2.993736  | 5.490955  |
| C | 0.065281   | 4.388650  | 3.826881  | H | -1.186096  | 2.684113  | 4.299112  |
| C | -0.145596  | 2.999715  | 4.422825  | H | -0.793301  | 5.422510  | 5.533672  |
| C | -4.291300  | 4.850500  | -1.735800 | H | -4.881034  | 4.643599  | -2.632230 |
| C | -2.989789  | 4.145003  | -1.798168 | H | -4.883300  | 4.538677  | -0.866579 |
| C | -2.503422  | 3.201910  | -2.666526 | H | -2.982268  | 2.755079  | -3.525203 |
| N | -1.983571  | 4.370143  | -0.882943 | H | -0.019162  | 3.540035  | -0.658251 |
| C | -0.946108  | 3.583054  | -1.203392 | H | -0.439691  | 1.921920  | -2.768587 |
| N | -1.226556  | 2.859042  | -2.282043 | H | -5.455808  | 8.269558  | 2.284432  |
| O | 0.340583   | 1.170956  | -3.183546 | H | -8.567969  | -2.703383 | -4.357764 |
| O | 2.232608   | -0.295592 | 1.902901  | H | 4.292946   | -0.255878 | -6.360067 |
| H | 3.710177   | 0.288353  | -4.761768 | H | 6.898458   | 0.693273  | -2.698549 |
| H | 2.844965   | 0.747704  | -6.245695 | H | 3.895537   | 4.028675  | -2.976526 |
| H | 2.563776   | -3.579709 | -2.906888 | H | 3.848259   | -7.160841 | 2.874488  |
| H | 1.226011   | -2.724736 | -2.150425 | H | -0.011342  | -7.475066 | 7.942271  |
| H | 2.284972   | -5.929617 | -3.702256 | H | -0.533752  | 6.443982  | 4.109023  |
| H | -0.859459  | -3.908734 | -1.587539 | H | -3.742397  | -5.502013 | 5.468030  |
| H | 1.129747   | -8.090878 | -3.360649 | H | -2.017345  | 5.020527  | -0.055414 |
| H | -2.020489  | -6.065131 | -1.245017 | H | 0.034230   | 0.240721  | -3.183178 |
| H | -1.035240  | -8.169961 | -2.134973 | H | -0.419203  | -6.370767 | 6.619458  |
| H | 1.432437   | -3.491494 | -5.109692 | H | -2.478642  | 5.404851  | 3.083475  |
| H | -2.091122  | -5.637597 | -7.249425 | H | 2.107418   | -0.960122 | -3.721763 |
| H | -2.492486  | -5.698308 | -5.525991 | H | 3.981552   | 0.513797  | -2.227438 |
| H | -2.890603  | -3.314609 | -7.411746 | H | 4.176641   | -3.652484 | 0.788975  |
| H | -4.114561  | -4.052307 | -6.367549 | C | 1.155269   | 1.015834  | 0.174932  |
| H | -2.697904  | -1.844327 | -5.499448 | C | 2.286068   | 0.027056  | 0.526030  |
| H | -3.085742  | -3.139734 | -4.363367 | H | 3.237009   | 0.530744  | 0.305231  |
| H | -0.175059  | -5.134780 | -5.359901 | H | 1.199782   | 1.787466  | 0.949798  |
| H | 2.613858   | 2.106826  | -4.061327 | C | -0.243963  | 0.424130  | 0.219852  |
| H | 1.647637   | 3.238775  | -3.133107 | C | -0.632146  | -0.634344 | -0.610645 |
| H | 3.438400   | 3.406288  | -1.399278 | C | -1.185960  | 0.954652  | 1.111786  |
| H | 6.981982   | -1.563910 | -3.116689 | C | -1.930439  | -1.141862 | -0.560678 |
| H | 5.380513   | -1.200660 | -3.705025 | H | 0.078244   | -1.046557 | -1.316316 |
| H | 4.777477   | -1.355124 | 0.000038  | C | -2.480254  | 0.433395  | 1.180962  |
| H | 6.223083   | -4.008778 | -4.200670 | H | -0.909586  | 1.797804  | 1.738941  |
| H | 5.973028   | -6.474496 | -4.154110 | C | -2.857618  | -0.616819 | 0.343004  |
| H | 4.336877   | -6.318460 | -0.157251 | H | -2.219241  | -1.936238 | -1.242451 |
| H | 5.044715   | -7.619365 | -2.163534 | H | -3.194378  | 0.855368  | 1.882860  |
| H | 6.433973   | 0.064013  | -1.132826 | H | 2.235126   | -0.866535 | -0.098343 |
| H | -2.855254  | -5.397443 | 3.142360  | H | -4.143075  | 5.932683  | -1.656479 |
| H | -2.876693  | -3.910854 | 7.178134  | H | -5.052425  | 6.624252  | 1.768063  |
| H | -1.090904  | -3.743509 | 2.551235  | H | -4.647722  | 4.610269  | 3.375090  |
| H | -1.102912  | -2.273401 | 6.577974  | H | -7.797735  | -3.755209 | -3.162886 |
| H | 0.443451   | -2.277544 | 3.361147  | H | -0.203218  | -4.164862 | -6.848430 |
| H | 0.376534   | -5.090327 | 8.627952  | H | -10.098495 | -1.787595 | -2.578962 |
| H | 2.484881   | -5.056343 | 6.394758  | C | -10.717451 | -3.086308 | -0.194706 |
| H | 0.941093   | -4.187343 | 6.346232  | H | -11.337667 | -3.889097 | -0.609046 |
| H | 1.101364   | -7.276209 | 6.580535  | H | -10.574557 | -3.288195 | 0.872440  |
| H | -10.298765 | -3.517206 | -2.800597 | H | -11.283075 | -2.150204 | -0.281922 |
| H | -8.849624  | -3.942921 | -0.812188 | C | -8.496932  | -1.889894 | -0.294049 |
| H | -7.628977  | -1.999995 | -3.040060 | H | -7.502746  | -1.842459 | -0.748181 |
| H | 1.717705   | -7.199510 | 1.570937  | H | -8.963280  | -0.902997 | -0.406745 |
| H | 4.722444   | -4.972627 | 3.694528  | H | -8.360213  | -2.071186 | 0.777551  |
| H | 0.472569   | -5.108650 | 1.140602  | H | -5.317444  | 3.205237  | 5.365877  |
| H | 3.457301   | -2.876784 | 3.281068  | H | 1.094562   | 4.713430  | 4.055910  |
| H | 1.834636   | -1.201790 | 1.976003  | O | -0.082744  | 4.296751  | 2.406801  |
| H | -3.126346  | 9.025787  | 1.641326  | H | -0.607892  | 5.042755  | 2.060376  |
| H | -3.063213  | 7.745693  | 2.871813  | C | 2.905316   | -2.090059 | 6.516530  |

H 2.032605 -1.895880 5.888084  
H 3.269418 -1.150145 6.936848  
H 3.697168 -2.543109 5.915520  
S 2.455005 -3.170246 7.924072  
H 1.881203 -6.001535 8.637762  
H -3.866534 -1.017794 0.387316

**Int2-R-SO-C1-r1**

C 3.657300 0.116500 -5.569700  
C 2.872550 -1.201960 -5.553014  
O 2.761941 -1.894218 -6.573701  
N 2.325532 -1.539630 -4.357160  
C 1.534200 -2.753800 -4.182800  
C 0.045084 -2.463230 -4.438838  
O -0.488619 -1.453690 -3.943480  
C 1.760939 -3.322461 -2.756725  
C 1.117126 -4.672396 -2.521596  
C 1.779857 -5.852604 -2.893018  
C -0.153276 -4.778140 -1.937737  
C 1.184301 -7.100507 -2.699686  
C -0.752259 -6.025004 -1.742605  
C -0.086563 -7.190868 -2.126502  
N -0.671884 -3.326747 -5.192856  
C -0.209600 -4.560900 -5.878500  
C -1.516987 -5.216178 -6.343214  
C -2.450078 -4.021129 -6.592607  
C -2.097968 -3.056679 -5.454705  
C 3.549400 3.336100 -2.297700  
C 4.915293 2.630120 -2.185654  
O 5.951274 3.313786 -2.170623  
C 2.376152 2.634797 -3.000457  
C 1.735649 1.376104 -2.339368  
O 1.294561 1.863724 -1.028506  
O 2.437317 0.268320 -2.304787  
N 4.923296 1.280245 -2.056671  
C 6.176600 0.548600 -1.888400  
C 6.170263 -0.873505 -2.470735  
C 5.680512 -1.977101 -1.570542  
C 5.147475 -1.896660 -0.305229  
C 5.743330 -3.384577 -1.884620  
C 5.228633 -4.094499 -0.760239  
C 6.193539 -4.115311 -2.999819  
N 4.877861 -3.160137 0.185829  
C 5.154748 -5.492419 -0.729730  
C 6.123107 -5.504359 -2.972988  
C 5.608378 -6.185023 -1.848175  
C -2.868600 -4.876300 5.185100  
C -2.296316 -4.856057 3.910273  
C -2.518146 -3.879550 6.101466  
C -1.372780 -3.874710 3.555910  
C -1.591000 -2.894524 5.763267  
C -0.991689 -2.892931 4.490562  
O -0.068540 -1.950678 4.211439  
C 0.539600 -6.576500 7.394900  
C 1.092152 -5.355044 8.138491  
C 1.642384 -4.303843 7.172622  
C -7.962600 -3.393700 -3.571000  
C -9.234237 -3.348511 -2.716698  
C -9.013377 -3.571227 -1.207401  
C 3.596200 -5.943100 2.960000  
C 3.946745 -4.672816 3.430388  
C 2.462925 -6.065127 2.145276  
C 3.172184 -3.551447 3.120905

C 1.684236 -4.956498 1.828229  
C 1.991644 -3.660622 2.330911  
O 1.208875 -2.632589 2.084221  
C -5.398200 7.377800 1.290000  
C -3.967648 7.804005 1.607993  
C -2.928931 6.711746 1.343328  
O -3.393757 5.540541 1.111869  
O -1.711394 7.008132 1.410498  
C -5.202800 4.796800 4.112600  
C -3.840585 5.067996 4.780887  
O -3.767467 5.366291 5.978179  
C -6.150500 3.995000 5.012800  
N -2.756057 4.986558 3.965559  
C -1.419700 5.463200 4.334700  
C -0.309487 4.682523 3.610026  
C -0.179976 3.247832 4.109745  
C -4.525700 4.540100 -1.975600  
C -3.200614 3.886052 -1.842605  
C -2.528452 3.035259 -2.675918  
N -2.382666 4.087885 -0.747324  
C -1.260058 3.388725 -0.910936  
N -1.325391 2.741892 -2.074969  
O 0.513395 1.196342 -3.157043  
O 2.348731 -0.197451 1.865671  
H 3.839486 0.510202 -4.570933  
H 3.093169 0.853838 -6.150238  
H 2.843831 -3.398700 -2.619352  
H 1.394552 -2.596236 -2.026002  
H 2.776951 -5.792022 -3.321642  
H -0.669652 -3.877269 -1.619368  
H 1.717135 -8.002359 -2.988216  
H -1.735216 -6.084030 -1.283761  
H -0.549023 -8.161466 -1.971287  
H 1.899370 -3.472649 -4.919382  
H -1.368259 -5.843550 -7.225686  
H -1.917875 -5.847452 -5.542589  
H -2.221045 -3.559400 -7.559592  
H -3.508546 -4.293360 -6.591816  
H -2.237611 -2.003458 -5.707771  
H -2.686689 -3.260454 -4.551114  
H 0.357627 -5.199084 -5.199514  
H 2.658418 2.340639 -4.015529  
H 1.579892 3.379410 -3.108115  
H 3.245210 3.588344 -1.273859  
H 7.203566 -1.109688 -2.761810  
H 5.601523 -0.870273 -3.410164  
H 4.926155 -1.031547 0.301378  
H 6.590476 -3.601932 -3.871624  
H 6.469715 -6.077168 -3.828864  
H 4.754469 -6.009303 0.137351  
H 5.565517 -7.270700 -1.855569  
H 6.463188 0.509027 -0.827407  
H -2.569920 -5.614084 3.180357  
H -2.965569 -3.870828 7.092303  
H -0.924087 -3.851409 2.569388  
H -1.306347 -2.125333 6.475085  
H 0.424718 -2.185122 3.348948  
H 0.296666 -4.906350 8.746129  
H 2.487377 -4.704442 6.602451  
H 0.866781 -4.000773 6.463634  
H 1.312647 -7.050088 6.779487  
H -9.933375 -4.113298 -3.081138  
H -8.487154 -4.530816 -1.088595



H -7.268244 -2.587211 -3.315929  
H 2.182291 -7.041275 1.754494  
H 4.833457 -4.551030 4.049461  
H 0.810610 -5.061335 1.190956  
H 3.443930 -2.568280 3.496929  
H 1.913816 -1.083874 1.957154  
H -3.676505 8.696124 1.041063  
H -3.873218 8.084573 2.665671  
H -5.510947 7.144292 0.226681  
H -6.232908 4.473129 5.991889  
H -7.147927 3.931794 4.567580  
H -5.641803 5.782233 3.914702  
H 0.597235 2.717460 3.552071  
H 0.089208 3.230695 5.170762  
H -1.126016 2.712253 3.985581  
H -1.310248 5.368860 5.417718  
H -5.037148 4.178589 -2.870420  
H -5.160200 4.333920 -1.108230  
H -2.806489 2.620859 -3.631495  
H -0.433626 3.358428 -0.222741  
H -0.594358 2.083640 -2.461052  
H -6.108741 8.176383 1.533890  
H -8.201687 -3.295223 -4.635182  
H 4.605940 -0.052333 -6.085906  
H 6.950579 1.140373 -2.384901  
H 3.760895 4.282923 -2.802362  
H 4.197053 -6.812386 3.210771  
H 0.165611 -7.327901 8.098368  
H -1.330063 6.527138 4.078480  
H -3.587569 -5.644149 5.455488  
H -2.658323 4.681551 0.107966  
H 0.353460 0.240022 -3.281432  
H -0.286324 -6.292938 6.734201  
H -2.916827 4.856454 2.969046  
H 2.371652 -0.858417 -3.571516  
H 4.013664 0.773233 -2.080532  
H 4.424611 -3.353994 1.072680  
C 1.146532 1.033705 0.146110  
C 2.358863 0.137212 0.487475  
H 3.263905 0.716963 0.271275  
H 1.133415 1.779350 0.950610  
C -0.184108 0.291964 0.230578  
C -0.597931 -0.629994 -0.739719  
C -1.030019 0.519394 1.324621  
C -1.830666 -1.275171 -0.637801  
H 0.038528 -0.838287 -1.587811  
C -2.254051 -0.143450 1.446271  
H -0.728713 1.226592 2.090742  
C -2.664371 -1.039091 0.458501  
H -2.140065 -1.954588 -1.427216  
H -2.887164 0.048257 2.308191  
H 2.378655 -0.752137 -0.144284  
H -4.429702 5.628460 -2.055113  
H -5.677415 6.484702 1.848225  
H -5.065953 4.313821 3.141012  
H -7.430919 -4.343100 -3.437206  
H 0.432911 -4.294199 -6.726601  
H 0.631737 5.215268 3.833158  
O -0.527434 4.640144 2.202868  
H -0.825746 5.528084 1.885916  
H -5.783196 2.975027 5.166711  
H -9.739860 -2.382684 -2.861380  
C -10.359978 -3.680994 -0.476911

H -10.218899 -3.880708 0.590871  
H -10.929261 -2.747374 -0.566892  
H -10.975803 -4.486959 -0.891632  
C -8.144129 -2.475655 -0.572315  
H -7.149187 -2.424353 -1.024338  
H -8.614544 -1.490919 -0.686953  
H -8.008908 -2.655210 0.499750  
H 1.880727 -5.666137 8.835108  
S 2.195654 -2.801248 8.080794  
C 2.638059 -1.725643 6.667390  
H 2.891484 -0.745474 7.076905  
H 3.503057 -2.123524 6.131686  
H 1.794137 -1.627405 5.979977  
H -3.621854 -1.546158 0.540235

**TS3-R-SO-C1-r1**

C 3.648000 0.062993 -5.617999  
C 2.872727 -1.261075 -5.613603  
O 2.705491 -1.919792 -6.646090  
N 2.388290 -1.644798 -4.402154  
C 1.508947 -2.797997 -4.235102  
C 0.063584 -2.416758 -4.614978  
O -0.418554 -1.341019 -4.215439  
C 1.574550 -3.244784 -2.751604  
C 0.750501 -4.470803 -2.422689  
C 1.269604 -5.758480 -2.628865  
C -0.548522 -4.348603 -1.908500  
C 0.509362 -6.893143 -2.339583  
C -1.310338 -5.482080 -1.615323  
C -0.785675 -6.757712 -1.833353  
N -0.671231 -3.271760 -5.357211  
C -0.263005 -4.577993 -5.929993  
C -1.583770 -5.165185 -6.445563  
C -2.400469 -3.923428 -6.835662  
C -2.051457 -2.913779 -5.736380  
C 3.592002 3.260999 -2.323000  
C 4.950962 2.534503 -2.269132  
O 6.000143 3.174457 -2.431239  
C 2.416878 2.656867 -3.113906  
C 1.727075 1.352034 -2.655397  
O 1.037077 1.926316 -1.140970  
O 2.406428 0.294647 -2.427973  
N 4.949321 1.210795 -1.974276  
C 6.197999 0.447001 -1.952000  
C 5.984379 -1.063933 -1.735024  
C 5.914674 -1.519143 -0.304047  
C 4.845421 -2.093903 0.341008  
C 6.995555 -1.504193 0.653972  
C 6.496251 -2.081885 1.859027  
C 8.337313 -1.080963 0.614622  
N 5.185353 -2.430446 1.634108  
C 7.291867 -2.230120 3.001557  
C 9.130698 -1.229409 1.747127  
C 8.611561 -1.795991 2.930553  
C -2.844000 -4.946001 5.150000  
C -2.173334 -4.942070 3.923541  
C -2.567082 -3.933829 6.074571  
C -1.229756 -3.960772 3.623716  
C -1.622466 -2.948212 5.791349  
C -0.927596 -2.957287 4.566595  
O 0.002844 -2.009381 4.345491  
C 0.565000 -6.690999 7.323000  
C 0.835750 -5.475425 8.217410

|   |           |           |           |   |           |           |           |
|---|-----------|-----------|-----------|---|-----------|-----------|-----------|
| C | 1.477336  | -4.328360 | 7.435162  | H | 1.639220  | 3.423231  | -3.184103 |
| C | -7.987942 | -3.358001 | -3.558006 | H | 3.263300  | 3.414197  | -1.287368 |
| C | -7.772611 | -4.676708 | -2.807142 | H | 6.826381  | -1.573057 | -2.223319 |
| C | -6.329218 | -4.925138 | -2.326216 | H | 5.087376  | -1.385444 | -2.277251 |
| C | 3.595000  | -6.055001 | 2.871000  | H | 3.850322  | -2.298822 | -0.025684 |
| C | 3.582872  | -5.035631 | 3.828034  | H | 8.752246  | -0.644444 | -0.289929 |
| C | 2.871483  | -5.861881 | 1.686538  | H | 10.166948 | -0.903516 | 1.723755  |
| C | 2.854485  | -3.859875 | 3.623767  | H | 6.890989  | -2.671622 | 3.909238  |
| C | 2.140493  | -4.696808 | 1.469356  | H | 9.253664  | -1.896661 | 3.801125  |
| C | 2.083419  | -3.658442 | 2.442063  | H | 6.857439  | 0.852610  | -1.176346 |
| O | 1.335476  | -2.591002 | 2.256452  | H | -2.385970 | -5.713098 | 3.186835  |
| C | -5.292996 | 7.357001  | 1.357001  | H | -3.087591 | -3.912167 | 7.028927  |
| C | -4.158120 | 8.224653  | 1.907436  | H | -0.712185 | -3.953123 | 2.671071  |
| C | -2.802880 | 7.777764  | 1.340226  | H | -1.397439 | -2.167084 | 6.511526  |
| O | -2.584409 | 6.503337  | 1.437529  | H | 0.544448  | -2.217378 | 3.490434  |
| O | -2.033524 | 8.605609  | 0.834253  | H | -0.106214 | -5.128707 | 8.659450  |
| C | -5.099899 | 4.754795  | 4.160898  | H | 2.444980  | -4.635615 | 7.024167  |
| C | -3.684085 | 4.786718  | 4.767039  | H | 0.832413  | -4.031343 | 6.603447  |
| O | -3.487691 | 4.510788  | 5.954628  | H | 1.488404  | -7.059411 | 6.862597  |
| C | -6.095001 | 3.980204  | 5.030102  | H | -8.083051 | -5.517667 | -3.444460 |
| N | -2.683663 | 5.142079  | 3.913481  | H | -6.030000 | -4.059338 | -1.716162 |
| C | -1.309002 | 5.386002  | 4.360000  | H | -7.677129 | -2.501808 | -2.948091 |
| C | -0.366217 | 4.193423  | 4.110351  | H | 2.871995  | -6.635364 | 0.920896  |
| C | -0.662034 | 2.978840  | 4.988141  | H | 4.146085  | -5.155013 | 4.751799  |
| C | -4.469102 | 4.533997  | -1.934000 | H | 1.568320  | -4.566646 | 0.554577  |
| C | -3.054490 | 4.216180  | -1.561478 | H | 2.833443  | -3.087245 | 4.387567  |
| C | -2.167665 | 3.302951  | -2.079181 | H | 1.870778  | -0.937948 | 1.932306  |
| N | -2.382888 | 4.841198  | -0.524897 | H | -4.316814 | 9.282652  | 1.676934  |
| C | -1.156393 | 4.316507  | -0.429433 | H | -4.120593 | 8.128215  | 3.001266  |
| N | -0.992349 | 3.383248  | -1.361852 | H | -5.369920 | 7.460213  | 0.267998  |
| O | 0.597808  | 1.212027  | -3.456370 | H | -6.123344 | 4.391552  | 6.041628  |
| O | 2.152533  | -0.001566 | 1.812705  | H | -7.100518 | 4.032570  | 4.601749  |
| C | 0.900865  | 1.202051  | 0.088375  | H | -5.432554 | 5.794047  | 4.042189  |
| C | 2.128794  | 0.316357  | 0.430966  | H | 0.044994  | 2.174626  | 4.765599  |
| C | -0.405758 | 0.420781  | 0.221576  | H | -0.582087 | 3.233656  | 6.049397  |
| C | -0.914764 | 0.156180  | 1.503757  | H | -1.677069 | 2.608742  | 4.812744  |
| C | -1.113666 | -0.068560 | -0.883431 | H | -1.316961 | 5.634807  | 5.425346  |
| C | -2.086043 | -0.582835 | 1.675713  | H | -4.782503 | 3.907480  | -2.771704 |
| C | -2.290536 | -0.804000 | -0.714400 | H | -5.151444 | 4.351213  | -1.097004 |
| C | -2.781545 | -1.067606 | 0.565650  | H | -2.285175 | 2.605178  | -2.892956 |
| O | -0.367340 | 3.832614  | 2.721798  | H | -0.442084 | 4.586382  | 0.333820  |
| C | -6.266725 | -6.172526 | -1.432887 | H | -0.075503 | 2.693096  | -1.364780 |
| C | -5.334657 | -5.046428 | -3.491063 | H | -6.263265 | 7.638931  | 1.781979  |
| C | 2.298161  | -1.649849 | 7.247393  | H | -9.044416 | -3.218522 | -3.810588 |
| S | 1.727819  | -2.851482 | 8.505135  | H | 4.538132  | -0.055115 | -6.240233 |
| H | 3.928685  | 0.389283  | -4.617027 | H | 6.721511  | 0.604937  | -2.904646 |
| H | 3.018934  | 0.831555  | -6.078652 | H | 3.817505  | 4.246255  | -2.737519 |
| H | 2.628979  | -3.430904 | -2.522962 | H | 4.162109  | -6.966321 | 3.035486  |
| H | 1.254079  | -2.398633 | -2.135954 | H | 0.128593  | -7.512578 | 7.900742  |
| H | 2.281423  | -5.870172 | -3.011277 | H | -0.938500 | 6.244971  | 3.794325  |
| H | -0.958434 | -3.359226 | -1.724476 | H | -3.577729 | -5.714085 | 5.376357  |
| H | 0.930981  | -7.881191 | -2.501462 | H | -2.668637 | 5.590385  | 0.171645  |
| H | -2.309382 | -5.366736 | -1.204527 | H | 0.410777  | 0.255465  | -3.573491 |
| H | -1.376103 | -7.638992 | -1.600063 | H | -0.132899 | -6.438982 | 6.517862  |
| H | 1.874001  | -3.594081 | -4.887028 | H | -2.904107 | 5.535607  | 2.989683  |
| H | -1.425805 | -5.860153 | -7.274057 | H | 2.416472  | -0.959754 | -3.630256 |
| H | -2.086787 | -5.708839 | -5.638484 | H | 4.042703  | 0.720662  | -2.005905 |
| H | -2.070823 | -3.545726 | -7.809927 | H | 4.558875  | -2.874009 | 2.297328  |
| H | -3.474627 | -4.115861 | -6.894335 | H | 3.029259  | 0.889885  | 0.183259  |
| H | -2.089575 | -1.872289 | -6.062713 | H | 0.889138  | 1.966266  | 0.881150  |
| H | -2.713110 | -3.013826 | -4.866677 | H | -0.378252 | 0.523113  | 2.371537  |
| H | 0.206529  | -5.209646 | -5.174114 | H | -0.756038 | 0.145112  | -1.881286 |
| H | 2.733270  | 2.455172  | -4.144308 | H | -2.451691 | -0.781254 | 2.678847  |

H -2.823973 -1.165054 -1.590365  
H 2.132534 -0.582666 -0.189011  
H -4.582090 5.582375 -2.230586  
H -5.112447 6.304140 1.577564  
H -5.049097 4.334619 3.150148  
H -7.420451 -3.320949 -4.493258  
H 0.452102 -4.417280 -6.746185  
H 0.655012 4.540457 4.309034  
H -1.266748 3.534526 2.519464  
H -5.812046 2.926392 5.110006  
H -8.437208 -4.698425 -1.933046  
H -5.253107 -6.340357 -1.053116  
H -6.936912 -6.080094 -0.571155  
H -6.564375 -7.068704 -1.991793  
H -5.307369 -4.141168 -4.105587  
H -4.318554 -5.224267 -3.122083  
H -5.602928 -5.886557 -4.144426  
H 2.385002 -0.681069 7.743971  
H 3.276763 -1.933845 6.851870  
H 1.575504 -1.576519 6.430679  
H 1.486934 -5.764327 9.052080  
H -3.696301 -1.639180 0.697592

**Prod-R-SO-C1-r1**

C 3.207387 -0.532779 -5.949503  
C 2.130090 -1.617998 -5.914772  
O 1.688414 -2.125624 -6.948462  
N 1.667342 -1.982893 -4.678740  
C 0.469518 -2.814693 -4.546698  
C -0.763819 -1.973961 -4.938546  
O -0.827088 -0.773788 -4.599891  
C 0.368668 -3.343648 -3.093645  
C -0.658068 -4.441337 -2.910032  
C -0.349472 -5.764329 -3.263459  
C -1.931565 -4.166402 -2.394825  
C -1.292506 -6.783213 -3.119995  
C -2.877419 -5.184192 -2.249848  
C -2.563186 -6.494345 -2.615265  
N -1.763026 -2.555803 -5.630579  
C -1.820687 -3.937255 -6.182422  
C -3.268566 -4.056216 -6.672220  
C -3.621621 -2.623336 -7.099061  
C -2.940546 -1.759070 -6.031797  
C 4.226285 2.324581 -2.502699  
C 5.087264 1.152725 -2.992226  
O 5.574777 1.175180 -4.127945  
C 2.927957 2.471006 -3.321505  
C 2.042735 1.237122 -3.336930  
O 1.190213 1.317468 0.091281  
O 2.323909 0.178964 -2.791266  
N 5.287709 0.128504 -2.117047  
C 5.994903 -1.097594 -2.486108  
C 5.131029 -2.375843 -2.496748  
C 4.930156 -3.015690 -1.153289  
C 3.751614 -3.160066 -0.457696  
C 5.947039 -3.656868 -0.352415  
C 5.302946 -4.160930 0.815411  
C 7.328850 -3.876027 -0.509412  
N 3.970365 -3.836330 0.723254  
C 5.999134 -4.859241 1.809969  
C 8.022931 -4.568257 0.476761  
C 7.363936 -5.053729 1.626493  
C -3.693196 -4.389098 5.036503

C -2.953983 -4.324845 3.852877  
C -3.546914 -3.367694 5.981266  
C -2.076182 -3.268322 3.604352  
C -2.672180 -2.306989 5.751044  
C -1.925255 -2.249752 4.561745  
O -1.084349 -1.197041 4.399214  
C -0.749301 -7.124406 6.836800  
C 0.037518 -6.069282 7.623815  
C 0.413282 -4.867065 6.753799  
C -8.763610 -0.883957 -3.137782  
C -8.214001 -2.132298 -3.836424  
C -7.568903 -3.172273 -2.899212  
C 2.049501 -7.000700 2.193204  
C 2.082961 -5.846340 2.981144  
C 1.327166 -6.966061 0.992586  
C 1.423117 -4.679577 2.585180  
C 0.661770 -5.816540 0.584178  
C 0.685227 -4.619161 1.361352  
O 0.065295 -3.543705 0.956182  
C -2.972500 8.358301 2.084202  
C -1.720632 8.957933 2.724736  
C -0.393953 8.341532 2.244456  
O -0.397195 7.055610 2.071168  
O 0.593464 9.077632 2.107590  
C -3.309500 5.606801 4.726602  
C -1.909821 5.240614 5.246232  
O -1.732781 4.846742 6.404063  
C -4.414900 4.943500 5.553999  
N -0.908638 5.376809 4.341943  
C 0.515698 5.195602 4.652399  
C 1.053441 3.877589 4.075212  
C 0.415978 2.626627 4.685005  
C -3.151997 5.657897 -1.401997  
C -1.855338 4.999990 -1.047664  
C -1.259184 3.859189 -1.536326  
N -0.973985 5.477576 -0.094308  
C 0.079787 4.629300 -0.047569  
N -0.049890 3.632081 -0.908790  
O 0.931301 1.409058 -4.061076  
O 0.499408 -1.487167 2.299817  
H 3.828362 -0.495527 -5.055502  
H 2.713476 0.437286 -6.068440  
H 1.361169 -3.723206 -2.828784  
H 0.151492 -2.506973 -2.421999  
H 0.640654 -5.997167 -3.648053  
H -2.178434 -3.153273 -2.090560  
H -1.033067 -7.801706 -3.394702  
H -3.856677 -4.952720 -1.840717  
H -3.297263 -7.286196 -2.497805  
H 0.580836 -3.652716 -5.237304  
H -3.367429 -4.787306 -7.478419  
H -3.911838 -4.374814 -5.844636  
H -3.194452 -2.408021 -8.084692  
H -4.698014 -2.442067 -7.151123  
H -2.620443 -0.779236 -6.392246  
H -3.590478 -1.598523 -5.162956  
H -1.573718 -4.676073 -5.420472  
H 3.164531 2.707017 -4.364962  
H 2.328947 3.305268 -2.940965  
H 3.978222 2.218909 -1.442214  
H 5.639531 -3.091039 -3.158549  
H 4.165779 -2.157142 -2.963416  
H 2.752595 -2.839791 -0.717850

H 7.849560 -3.515014 -1.392390  
H 9.089472 -4.741253 0.362481  
H 5.485804 -5.240555 2.687484  
H 7.931923 -5.591968 2.380097  
H 6.845864 -1.237155 -1.809556  
H -3.055924 -5.108058 3.105980  
H -4.115653 -3.396543 6.907216  
H -1.511464 -3.239965 2.676945  
H -2.549615 -1.512459 6.481080  
H -0.520065 -1.291460 3.577831  
H -0.557550 -5.727409 8.479759  
H 1.018516 -5.187325 5.899139  
H -0.484047 -4.374101 6.366927  
H -0.162090 -7.508381 5.995498  
H -7.464522 -1.822122 -4.576751  
H -6.782257 -2.657748 -2.326388  
H -9.587564 -1.123373 -2.458210  
H 1.286498 -7.853987 0.363776  
H 2.635896 -5.848528 3.919256  
H 0.106993 -5.800222 -0.349555  
H 1.454829 -3.789603 3.207679  
H 0.299884 -2.358325 1.751411  
H -1.674939 10.040089 2.566992  
H -1.757888 8.800660 3.812520  
H -2.993982 8.550346 1.004870  
H -4.301615 5.193545 6.611061  
H -5.402329 5.274611 5.217877  
H -3.407395 6.699276 4.773939  
H 0.903408 3.886817 2.987526  
H 0.854309 1.716575 4.264181  
H 0.561092 2.596364 5.770495  
H -0.661043 2.596720 4.495236  
H 0.602703 5.175464 5.743685  
H -3.667133 5.067756 -2.163627  
H -3.817048 5.743953 -0.534849  
H -1.635575 3.187740 -2.295409  
H 0.908449 4.782258 0.628117  
H 0.715838 2.093274 -0.293737  
H -3.886242 8.785549 2.512282  
H -9.141585 -0.160645 -3.868033  
H 3.834225 -0.699516 -6.826939  
H 6.393815 -0.910129 -3.484919  
H 4.816216 3.237020 -2.623639  
H 2.569565 -7.901814 2.504678  
H -1.016306 -7.972623 7.475642  
H -4.375713 -5.214162 5.217771  
H -1.046207 6.262266 0.570086  
H 0.410636 0.565930 -4.115722  
H -1.674791 -6.702661 6.429982  
H -1.086677 5.847843 3.451322  
H 1.901100 -1.383810 -3.888006  
H 4.726110 0.112375 -1.277077  
H 3.240952 -4.118757 1.372625  
C 0.335599 0.626495 0.986655  
C 1.176710 -0.580670 1.457767  
H 2.062745 -0.178344 1.969106  
H 0.110295 1.245052 1.872215  
C -0.993836 0.218618 0.369020  
C -2.115832 0.007339 1.183037  
C -1.128162 0.046546 -1.013347  
C -3.341095 -0.365748 0.628749  
H -2.026815 0.130745 2.258594  
C -2.356117 -0.314859 -1.574501

H -0.265560 0.212871 -1.648445  
C -3.467746 -0.522669 -0.754063  
H -4.198607 -0.526002 1.276732  
H -2.431368 -0.426859 -2.652044  
H 1.526888 -1.097131 0.554397  
H -3.003375 6.668266 -1.801092  
H -3.002418 7.276219 2.225982  
H -3.391401 5.333746 3.669221  
H -7.983847 -0.384865 -2.550842  
H -1.107518 -4.029446 -7.010871  
H 2.136757 3.871385 4.245367  
H -4.372505 3.853682 5.465053  
O 1.256029 6.304726 4.184352  
H 0.921063 6.527732 3.286592  
H 0.948585 -6.519864 8.036803  
S 1.379465 -3.637835 7.726243  
C 1.763212 -2.413517 6.421338  
H 2.315950 -1.602468 6.900484  
H 2.391109 -2.859329 5.645847  
H 0.853204 -2.009358 5.971749  
H -9.018841 -2.619904 -4.405880  
C -6.901587 -4.290115 -3.713495  
H -6.156018 -3.887408 -4.408269  
H -6.396872 -5.011651 -3.061910  
H -7.644695 -4.840232 -4.304572  
C -8.570943 -3.762943 -1.896029  
H -9.006041 -2.996219 -1.248004  
H -9.394173 -4.266062 -2.419183  
H -8.086554 -4.503357 -1.250349  
H -4.425354 -0.799183 -1.187694

**TS1-R-SO-C2-r1**

C 3.016200 0.281800 -5.914400  
C 2.080921 -0.925398 -5.910070  
O 1.819128 -1.541669 -6.947908  
N 1.543373 -1.266496 -4.701279  
C 0.527800 -2.312600 -4.593400  
C -0.876207 -1.677416 -4.685137  
O -1.119425 -0.633722 -4.055485  
C 0.696897 -3.077045 -3.255715  
C -0.187086 -4.299790 -3.130730  
C 0.235046 -5.536552 -3.642051  
C -1.444985 -4.226744 -2.515321  
C -0.578751 -6.667490 -3.551293  
C -2.262791 -5.355157 -2.424770  
C -1.833736 -6.579011 -2.943638  
N -1.827034 -2.268862 -5.436985  
C -1.721900 -3.509500 -6.232700  
C -3.177162 -3.803889 -6.621831  
C -3.808818 -2.406473 -6.721047  
C -3.158499 -1.644988 -5.560293  
C 3.923800 2.973100 -2.306400  
C 5.116624 2.023264 -2.491006  
O 6.258256 2.488932 -2.587698  
C 2.484822 2.430131 -2.469108  
C 2.084593 1.247148 -1.560716  
O 1.801846 1.502682 -0.347211  
O 2.081660 0.083538 -2.069484  
N 4.877540 0.686092 -2.503160  
C 5.965900 -0.281400 -2.587600  
C 5.491886 -1.673461 -3.065691  
C 5.251250 -2.668223 -1.965474  
C 4.106229 -2.837692 -1.223289

|   |           |           |           |   |           |           |           |
|---|-----------|-----------|-----------|---|-----------|-----------|-----------|
| C | 6.208215  | -3.617452 | -1.452162 | H | -3.717262 | -1.773528 | -4.624951 |
| C | 5.566256  | -4.334780 | -0.401071 | H | -1.274457 | -4.315589 | -5.649565 |
| C | 7.538953  | -3.940087 | -1.777300 | H | 2.297313  | 2.130281  | -3.501133 |
| N | 4.289343  | -3.835715 | -0.287119 | H | 1.803909  | 3.258386  | -2.258614 |
| C | 6.213422  | -5.350719 | 0.313348  | H | 4.042152  | 3.399244  | -1.301997 |
| C | 8.185747  | -4.945325 | -1.067753 | H | 6.255944  | -2.077278 | -3.739133 |
| C | 7.528315  | -5.643945 | -0.032116 | H | 4.589821  | -1.556016 | -3.676481 |
| C | -3.137900 | -4.881800 | 4.978100  | H | 3.169449  | -2.302228 | -1.289202 |
| C | -2.574229 | -4.672722 | 3.716735  | H | 8.056570  | -3.409083 | -2.572025 |
| C | -2.766308 | -4.038696 | 6.031003  | H | 9.213581  | -5.199687 | -1.311232 |
| C | -1.651151 | -3.647937 | 3.499723  | H | 5.701325  | -5.890187 | 1.104281  |
| C | -1.843909 | -3.012253 | 5.830794  | H | 8.058570  | -6.425780 | 0.504424  |
| C | -1.273668 | -2.811172 | 4.562521  | H | 6.472402  | -0.375167 | -1.617858 |
| O | -0.373266 | -1.802012 | 4.432804  | H | -2.852805 | -5.313332 | 2.884198  |
| C | 0.084000  | -7.476200 | 6.487600  | H | -3.196946 | -4.179408 | 7.018879  |
| C | 0.966382  | -6.505609 | 7.281608  | H | -1.226352 | -3.495731 | 2.513518  |
| C | 1.363354  | -5.286864 | 6.445961  | H | -1.551492 | -2.355354 | 6.644270  |
| C | -8.774500 | -1.266100 | -2.765800 | H | 0.014347  | -1.753914 | 3.517237  |
| C | -8.303349 | -2.416784 | -3.661554 | H | 0.431806  | -6.172205 | 8.179604  |
| C | -7.464354 | -3.495869 | -2.948428 | H | 1.931798  | -5.596886 | 5.562390  |
| C | 2.690900  | -6.800900 | 1.780100  | H | 0.471467  | -4.752077 | 6.105020  |
| C | 2.748718  | -5.584268 | 2.465029  | H | 0.604154  | -7.845423 | 5.596856  |
| C | 1.816759  | -6.921305 | 0.693321  | H | -7.705953 | -2.002361 | -4.484536 |
| C | 1.954207  | -4.499056 | 2.076843  | H | -6.613441 | -2.989236 | -2.468022 |
| C | 1.018074  | -5.852657 | 0.294594  | H | -9.456077 | -1.608921 | -1.980850 |
| C | 1.077798  | -4.625605 | 0.981491  | H | 1.758638  | -7.858473 | 0.146179  |
| O | 0.283528  | -3.620601 | 0.553258  | H | 3.422755  | -5.467416 | 3.309490  |
| C | -3.570700 | 8.052600  | 2.918000  | H | 0.343837  | -5.941320 | -0.550689 |
| C | -2.036571 | 8.110046  | 2.898362  | H | 2.005361  | -3.555798 | 2.611776  |
| C | -1.499106 | 7.205267  | 1.782151  | H | 0.424092  | -2.772160 | 1.080044  |
| O | -1.359203 | 5.951952  | 2.098369  | H | -1.705818 | 9.136732  | 2.712509  |
| O | -1.299448 | 7.685425  | 0.656596  | H | -1.638754 | 7.788677  | 3.866406  |
| C | -3.584400 | 5.109400  | 5.367600  | H | -3.979352 | 8.430048  | 1.974523  |
| C | -2.122411 | 4.937365  | 5.807608  | H | -4.315348 | 3.616460  | 6.764425  |
| O | -1.855277 | 4.623390  | 6.975034  | H | -5.467964 | 4.012483  | 5.471574  |
| C | -4.409800 | 3.856300  | 5.702400  | H | -3.985473 | 5.976174  | 5.905771  |
| N | -1.175218 | 5.136728  | 4.856695  | H | 1.253732  | 2.781369  | 2.653167  |
| C | 0.256300  | 5.026700  | 5.145800  | H | 0.595822  | 2.374727  | 4.255347  |
| C | 1.090624  | 4.481595  | 3.974136  | H | -0.418263 | 3.204265  | 3.061178  |
| C | 0.598693  | 3.126545  | 3.458045  | H | 0.358662  | 4.375040  | 6.018043  |
| C | -3.656700 | 5.591000  | -0.744000 | H | -4.373182 | 5.670362  | -1.566230 |
| C | -2.518105 | 4.711512  | -1.134654 | H | -4.191739 | 5.199305  | 0.129773  |
| C | -2.245664 | 3.978019  | -2.266207 | H | -2.847019 | 3.886686  | -3.160944 |
| N | -1.447426 | 4.491482  | -0.295775 | H | 0.323370  | 3.291588  | -0.484268 |
| C | -0.590130 | 3.656451  | -0.933631 | H | -0.313014 | 2.474343  | -3.733314 |
| N | -1.038464 | 3.319798  | -2.136394 | H | -3.985304 | 8.658987  | 3.730503  |
| O | -0.079350 | 2.033448  | -4.579697 | H | -9.304113 | -0.506408 | -3.350223 |
| O | 0.637318  | -1.443957 | 1.963462  | H | 3.644858  | 0.235223  | -6.804032 |
| H | 3.635965  | 0.338839  | -5.016749 | H | 6.705159  | 0.129539  | -3.282209 |
| H | 2.402553  | 1.188902  | -5.953059 | H | 4.079895  | 3.799098  | -3.006218 |
| H | 1.748800  | -3.372458 | -3.190470 | H | 3.310859  | -7.637114 | 2.087303  |
| H | 0.503447  | -2.384056 | -2.431817 | H | -0.193028 | -8.342780 | 7.096853  |
| H | 1.213805  | -5.613405 | -4.109573 | H | 0.665908  | 6.008751  | 5.420207  |
| H | -1.779843 | -3.283044 | -2.094093 | H | -3.857470 | -5.679113 | 5.136639  |
| H | -0.230962 | -7.616544 | -3.949632 | H | -1.312792 | 4.978429  | 0.611973  |
| H | -3.232065 | -5.279317 | -1.939988 | H | -0.330036 | 1.108774  | -4.417402 |
| H | -2.467985 | -7.457615 | -2.868215 | H | -0.838713 | -6.988190 | 6.155872  |
| H | 0.693581  | -2.989877 | -5.432493 | H | -1.439145 | 5.441001  | 3.911834  |
| H | -3.245323 | -4.379831 | -7.548099 | H | 1.691397  | -0.664394 | -3.887409 |
| H | -3.661811 | -4.381185 | -5.826711 | H | 3.926879  | 0.333296  | -2.404300 |
| H | -3.540635 | -1.938091 | -7.674510 | H | 3.597406  | -4.134356 | 0.387940  |
| H | -4.899259 | -2.419374 | -6.647421 | C | 0.134029  | -0.173122 | 1.523251  |
| H | -3.051723 | -0.572522 | -5.736644 | C | 1.418262  | -0.231478 | 0.824632  |

H 2.305693 0.043158 1.371406  
H 0.109379 0.545872 2.348249  
C -1.194573 -0.209492 0.816270  
C -1.327272 -0.260693 -0.575550  
C -2.350405 -0.225528 1.612159  
C -2.595901 -0.329333 -1.160283  
H -0.451759 -0.226808 -1.215263  
C -3.614938 -0.303022 1.031001  
H -2.251857 -0.182305 2.694049  
C -3.739228 -0.354940 -0.360023  
H -2.669448 -0.352849 -2.242427  
H -4.500018 -0.316233 1.660886  
H 1.513576 -0.808472 -0.080832  
H -3.300793 6.594582 -0.488853  
H -3.926722 7.027540 3.046865  
H -3.642289 5.328743 4.298223  
H -7.925704 -0.774398 -2.276464  
H -1.099087 -3.333797 -7.119102  
H 2.105800 4.352227 4.373743  
O 1.223667 5.428728 2.922591  
H 0.333651 5.583282 2.535202  
H -4.061507 2.992754 5.126715  
H -9.173974 -2.897546 -4.131475  
C -6.899480 -4.499060 -3.964534  
H -6.297867 -3.996271 -4.730027  
H -6.263855 -5.245895 -3.476246  
H -7.708597 -5.035152 -4.476492  
C -8.255555 -4.227889 -1.854184  
H -8.612254 -3.545900 -1.076518  
H -9.129914 -4.735737 -2.281104  
H -7.636087 -4.988173 -1.366161  
H 1.869224 -7.023131 7.628780  
C 2.689914 -2.821778 6.174599  
H 3.242396 -2.020127 6.669356  
H 3.292705 -3.209008 5.349025  
H 1.747160 -2.425288 5.789467  
S 2.393605 -4.120866 7.429052  
H -4.723915 -0.405634 -0.816950

**Int1-R-SO-C2-r1**

C 2.746722 0.114899 -6.069303  
C 1.800757 -1.085746 -6.056883  
O 1.585980 -1.760230 -7.067475  
N 1.211047 -1.348838 -4.853772  
C 0.191134 -2.378906 -4.683824  
C -1.203061 -1.717971 -4.674001  
O -1.399413 -0.712903 -3.970842  
C 0.424676 -3.153996 -3.363083  
C -0.524732 -4.317146 -3.168171  
C -0.209663 -5.587942 -3.672941  
C -1.744084 -4.149819 -2.495860  
C -1.089188 -6.660734 -3.514965  
C -2.626900 -5.219925 -2.337362  
C -2.302683 -6.478958 -2.847412  
N -2.195032 -2.253447 -5.416079  
C -2.157110 -3.468881 -6.258429  
C -3.640670 -3.753239 -6.529530  
C -4.276890 -2.354448 -6.537544  
C -3.528340 -1.621246 -5.417979  
C 3.878900 2.743684 -2.478895  
C 4.997370 1.729526 -2.753287  
O 6.135558 2.149172 -2.983102  
C 2.374217 2.333242 -2.395914

C 1.990845 1.042139 -1.685339  
O 1.773297 1.127648 -0.367673  
O 1.900910 -0.023565 -2.292575  
N 4.726827 0.404568 -2.650571  
C 5.770095 -0.593187 -2.837700  
C 5.272011 -2.033100 -2.634143  
C 5.159666 -2.488101 -1.207459  
C 4.018408 -2.866005 -0.540846  
C 6.249417 -2.683799 -0.279692  
C 5.682543 -3.178872 0.931607  
C 7.644771 -2.512694 -0.351332  
N 4.322862 -3.266722 0.743160  
C 6.466050 -3.494732 2.048243  
C 8.425432 -2.826220 0.755975  
C 7.841023 -3.311375 1.945041  
C -3.286094 -4.845090 4.984299  
C -2.593653 -4.672743 3.780553  
C -3.090837 -3.912684 6.009332  
C -1.719109 -3.598982 3.590942  
C -2.222397 -2.835877 5.837155  
C -1.527324 -2.667898 4.626254  
O -0.692519 -1.603892 4.531359  
C -0.133698 -7.583519 6.381790  
C 0.666707 -6.587389 7.229347  
C 0.998790 -5.313563 6.449166  
C -8.997445 -0.947310 -2.565648  
C -8.589367 -2.328412 -3.090516  
C -7.921428 -3.250347 -2.051324  
C 2.354194 -6.992481 1.599517  
C 2.418630 -5.958122 2.538323  
C 1.676919 -6.751358 0.395979  
C 1.830843 -4.713523 2.290996  
C 1.091070 -5.519040 0.130833  
C 1.149464 -4.441087 1.064852  
O 0.614484 -3.280385 0.790420  
C -3.227799 8.107797 2.997197  
C -1.802746 8.145764 2.439521  
C -1.121188 6.770428 2.361676  
O -1.884301 5.751393 2.266178  
O 0.137423 6.731478 2.378001  
C -3.292397 5.153099 5.432701  
C -1.826949 5.031975 5.887967  
O -1.528854 5.077035 7.088379  
C -4.087900 3.868500 5.729800  
N -0.917725 4.853417 4.894975  
C 0.532595 4.908400 5.092298  
C 1.287339 3.946178 4.162966  
C 1.120962 2.486133 4.570718  
C -3.531299 5.673398 -0.671503  
C -2.377949 4.793796 -1.015488  
C -2.017209 4.135228 -2.168189  
N -1.393571 4.486383 -0.102622  
C -0.503655 3.671510 -0.716127  
N -0.842789 3.433858 -1.976228  
O -0.190018 1.918306 -4.378926  
O 0.784230 -1.239749 2.287289  
H 3.448031 0.086301 -5.231196  
H 2.157671 1.033819 -5.976795  
H 1.458446 -3.513395 -3.378504  
H 0.336177 -2.448539 -2.531396  
H 0.737468 -5.738003 -4.185435  
H -1.998319 -3.173418 -2.092759  
H -0.823843 -7.638395 -3.907365

|   |           |           |           |                       |           |           |           |
|---|-----------|-----------|-----------|-----------------------|-----------|-----------|-----------|
| H | -3.563646 | -5.071173 | -1.807904 | H                     | -0.536888 | 1.026230  | -4.204966 |
| H | -2.985605 | -7.313574 | -2.718250 | H                     | -1.076246 | -7.141745 | 6.040899  |
| H | 0.295594  | -3.051845 | -5.535893 | H                     | -1.241658 | 4.933121  | 3.930255  |
| H | -3.788765 | -4.305363 | -7.460974 | H                     | 1.348376  | -0.700224 | -4.083017 |
| H | -4.055686 | -4.350775 | -5.710416 | H                     | 3.771183  | 0.076528  | -2.604565 |
| H | -4.093536 | -1.861315 | -7.498735 | H                     | 3.652944  | -3.688006 | 1.379311  |
| H | -5.356825 | -2.371275 | -6.369018 | C                     | 0.607620  | -0.051939 | 1.509487  |
| H | -3.431688 | -0.545356 | -5.580512 | C                     | 1.614266  | -0.142684 | 0.351835  |
| H | -4.007687 | -1.765950 | -4.441948 | H                     | 2.597199  | -0.384524 | 0.763010  |
| H | -1.663828 | -4.292252 | -5.739770 | H                     | 0.891679  | 0.792406  | 2.144867  |
| H | 1.956166  | 2.219069  | -3.397784 | C                     | -0.841653 | 0.142562  | 1.086123  |
| H | 1.845863  | 3.164170  | -1.926668 | C                     | -1.523680 | 1.309453  | 1.447708  |
| H | 4.171252  | 3.218227  | -1.534764 | C                     | -1.532472 | -0.861621 | 0.388456  |
| H | 5.982821  | -2.683029 | -3.161849 | C                     | -2.870217 | 1.480818  | 1.114230  |
| H | 4.311782  | -2.164061 | -3.148595 | H                     | -0.997100 | 2.090397  | 1.990330  |
| H | 2.992246  | -2.885989 | -0.878554 | C                     | -2.875522 | -0.687970 | 0.054798  |
| H | 8.111097  | -2.145290 | -1.261488 | H                     | -1.024144 | -1.789546 | 0.139804  |
| H | 9.503058  | -2.696628 | 0.707667  | C                     | -3.548908 | 0.483361  | 0.415001  |
| H | 6.014123  | -3.871886 | 2.960930  | H                     | -3.382652 | 2.394131  | 1.401819  |
| H | 8.475668  | -3.546995 | 2.794667  | H                     | -3.403954 | -1.472764 | -0.480215 |
| H | 6.595412  | -0.373122 | -2.152923 | H                     | 1.320739  | -0.919028 | -0.350559 |
| H | -2.730091 | -5.385132 | 2.970927  | H                     | -3.208729 | 6.689840  | -0.419676 |
| H | -3.618888 | -4.022321 | 6.953129  | H                     | -3.234946 | 7.781333  | 4.040965  |
| H | -1.184079 | -3.479205 | 2.652341  | H                     | -3.339626 | 5.388909  | 4.366601  |
| H | -2.068305 | -2.109106 | 6.629050  | H                     | -8.137778 | -0.417741 | -2.139034 |
| H | -0.234006 | -1.536572 | 3.650463  | H                     | -1.611443 | -3.265669 | -7.188631 |
| H | 0.095996  | -6.325221 | 8.128849  | H                     | 2.356297  | 4.209463  | 4.260613  |
| H | 1.582716  | -5.556179 | 5.555154  | O                     | 0.871483  | 4.084904  | 2.808692  |
| H | 0.082640  | -4.808354 | 6.127971  | H                     | 0.691417  | 5.039692  | 2.612646  |
| H | 0.429884  | -7.889600 | 5.493888  | H                     | -3.698313 | 3.023677  | 5.152951  |
| H | -7.895922 | -2.196016 | -3.931901 | H                     | -9.471413 | -2.840094 | -3.502878 |
| H | -7.054711 | -2.711594 | -1.639371 | C                     | -7.402624 | -4.531328 | -2.720355 |
| H | -9.764975 | -1.013209 | -1.788043 | H                     | -6.704715 | -4.305640 | -3.534648 |
| H | 1.608185  | -7.540645 | -0.350786 | H                     | -6.882069 | -5.173172 | -2.001292 |
| H | 2.936543  | -6.118682 | 3.482396  | H                     | -8.231021 | -5.112833 | -3.144456 |
| H | 0.569981  | -5.347164 | -0.806016 | C                     | -8.859667 | -3.594513 | -0.884747 |
| H | 1.869637  | -3.928086 | 3.042914  | H                     | -9.186406 | -2.702191 | -0.342466 |
| H | 0.737009  | -2.086877 | 1.688417  | H                     | -9.756428 | -4.112845 | -1.247651 |
| H | -1.812554 | 8.552189  | 1.417796  | H                     | -8.363585 | -4.254231 | -0.164688 |
| H | -1.160962 | 8.814668  | 3.022701  | S                     | 1.974486  | -4.144809 | 7.484440  |
| H | -3.844794 | 7.409951  | 2.427730  | H                     | 1.595701  | -7.057776 | 7.574566  |
| H | -4.024222 | 3.612883  | 6.791856  | C                     | 2.287039  | -2.816102 | 6.265224  |
| H | -5.143524 | 3.996331  | 5.470519  | H                     | 1.352290  | -2.407509 | 5.873487  |
| H | -3.722573 | 5.991706  | 5.990312  | H                     | 2.832349  | -2.026806 | 6.787216  |
| H | 1.683892  | 1.835809  | 3.895628  | H                     | 2.903182  | -3.185269 | 5.441282  |
| H | 1.496268  | 2.324950  | 5.586715  | H                     | -4.595899 | 0.613203  | 0.155266  |
| H | 0.067949  | 2.190912  | 4.538908  |                       |           |           |           |
| H | 0.741636  | 4.676918  | 6.139428  | <b>TS2-R-SO-C2-r1</b> |           |           |           |
| H | -4.219410 | 5.737701  | -1.518691 | C                     | 3.019700  | -0.190000 | -5.955500 |
| H | -4.086803 | 5.291695  | 0.191329  | C                     | 1.998638  | -1.333334 | -5.919105 |
| H | -2.531869 | 4.124887  | -3.119546 | O                     | 1.676718  | -1.939602 | -6.948301 |
| H | 0.351730  | 3.262809  | -0.199539 | N                     | 1.488884  | -1.620503 | -4.692224 |
| H | -0.348576 | 2.402334  | -3.538867 | C                     | 0.511700  | -2.680700 | -4.480500 |
| H | -3.692634 | 9.099592  | 2.955063  | C                     | -0.918783 | -2.113430 | -4.505694 |
| H | -9.401258 | -0.326009 | -3.371931 | O                     | -1.202075 | -1.100163 | -3.841784 |
| H | 3.293133  | 0.122971  | -7.012211 | C                     | 0.782725  | -3.414807 | -3.144021 |
| H | 6.181010  | -0.495012 | -3.851577 | C                     | -0.042996 | -4.674378 | -2.984301 |
| H | 3.965634  | 3.518594  | -3.244264 | C                     | 0.433193  | -5.904887 | -3.462204 |
| H | 2.815649  | -7.955073 | 1.798405  | C                     | -1.308719 | -4.639380 | -2.381768 |
| H | -0.371558 | -8.485056 | 6.956053  | C                     | -0.333167 | -7.066185 | -3.345117 |
| H | 0.878627  | 5.931801  | 4.895819  | C                     | -2.079162 | -5.797735 | -2.264392 |
| H | -3.964992 | -5.681781 | 5.117169  | C                     | -1.594253 | -7.015369 | -2.746631 |
| H | -1.395562 | 4.818277  | 0.880148  | N                     | -1.859634 | -2.745321 | -5.243333 |

|   |           |           |           |   |           |           |           |
|---|-----------|-----------|-----------|---|-----------|-----------|-----------|
| C | -1.725500 | -3.984600 | -6.054100 | O | 0.635967  | -1.014002 | 1.959516  |
| C | -3.180726 | -4.361354 | -6.361391 | H | 3.346142  | 0.112255  | -4.960201 |
| C | -3.901840 | -3.005578 | -6.411117 | H | 2.568953  | 0.669141  | -6.462682 |
| C | -3.233725 | -2.210579 | -5.283869 | H | 1.847886  | -3.665893 | -3.126497 |
| C | 3.900300  | 2.745000  | -2.535800 | H | 0.597855  | -2.731046 | -2.311032 |
| C | 5.087052  | 1.774026  | -2.707156 | H | 1.416820  | -5.952331 | -3.923134 |
| O | 6.195031  | 2.219657  | -3.037705 | H | -1.688450 | -3.696067 | -2.000377 |
| C | 2.437976  | 2.309387  | -2.858857 | H | 0.057121  | -8.009905 | -3.715655 |
| C | 1.781122  | 1.037991  | -2.237303 | H | -3.054300 | -5.749826 | -1.788083 |
| O | 1.449822  | 1.226902  | -0.868379 | H | -2.190136 | -7.918269 | -2.649440 |
| O | 2.259615  | -0.109399 | -2.545166 | H | 0.641584  | -3.382587 | -5.306962 |
| N | 4.885279  | 0.471514  | -2.398320 | H | -3.267576 | -4.934925 | -7.287608 |
| C | 5.936000  | -0.525400 | -2.569100 | H | -3.582111 | -4.971722 | -5.545131 |
| C | 5.446738  | -1.959368 | -2.307392 | H | -3.720561 | -2.516106 | -7.374609 |
| C | 5.349816  | -2.365058 | -0.864073 | H | -4.983071 | -3.088215 | -6.273944 |
| C | 4.213428  | -2.696195 | -0.164438 | H | -3.209823 | -1.132360 | -5.457071 |
| C | 6.452380  | -2.555101 | 0.049541  | H | -3.726525 | -2.378649 | -4.317922 |
| C | 5.899533  | -3.001152 | 1.286715  | H | -1.202733 | -4.763129 | -5.497297 |
| C | 7.849114  | -2.415217 | -0.053525 | H | 2.355207  | 2.147513  | -3.936370 |
| N | 4.535348  | -3.064468 | 1.126182  | H | 1.800578  | 3.168877  | -2.629377 |
| C | 6.698846  | -3.299881 | 2.396784  | H | 3.949046  | 3.092492  | -1.494759 |
| C | 8.645577  | -2.711817 | 1.047458  | H | 6.153857  | -2.628326 | -2.816629 |
| C | 8.075317  | -3.148920 | 2.261722  | H | 4.480833  | -2.106992 | -2.804369 |
| C | -3.251800 | -4.566700 | 5.211100  | H | 3.178481  | -2.703677 | -0.475856 |
| C | -2.569854 | -4.546231 | 3.988331  | H | 8.303521  | -2.083038 | -0.983132 |
| C | -3.104585 | -3.475712 | 6.075293  | H | 9.724496  | -2.605741 | 0.974548  |
| C | -1.752864 | -3.470125 | 3.625814  | H | 6.257698  | -3.639910 | 3.329293  |
| C | -2.295740 | -2.394547 | 5.728396  | H | 8.721831  | -3.372509 | 3.105765  |
| C | -1.610487 | -2.379187 | 4.499846  | H | 6.777358  | -0.286562 | -1.907818 |
| O | -0.832674 | -1.299903 | 4.238915  | H | -2.668234 | -5.381909 | 3.300198  |
| C | -0.051700 | -7.055900 | 6.929400  | H | -3.623801 | -3.463371 | 7.030185  |
| C | 0.467881  | -5.859260 | 7.735409  | H | -1.223013 | -3.468706 | 2.676913  |
| C | 0.871516  | -4.691414 | 6.832088  | H | -2.180292 | -1.546346 | 6.396309  |
| C | -8.804900 | -1.489800 | -2.820800 | H | -0.391240 | -1.315190 | 3.347108  |
| C | -9.026308 | -2.156151 | -4.182956 | H | -0.305845 | -5.524768 | 8.437498  |
| C | -8.327238 | -3.518177 | -4.364030 | H | 1.655049  | -5.002587 | 6.132835  |
| C | 2.601800  | -6.716900 | 2.211700  | H | 0.014710  | -4.340961 | 6.248288  |
| C | 2.494425  | -5.574527 | 3.011626  | H | 0.711974  | -7.431003 | 6.239319  |
| C | 2.078897  | -6.665008 | 0.912518  | H | -8.671380 | -1.477804 | -4.970276 |
| C | 1.889749  | -4.406981 | 2.536442  | H | -7.255474 | -3.369358 | -4.161168 |
| C | 1.478412  | -5.511999 | 0.421249  | H | -9.231951 | -2.076634 | -2.001516 |
| C | 1.360580  | -4.326772 | 1.210247  | H | 2.146387  | -7.541202 | 0.269507  |
| O | 0.812544  | -3.245185 | 0.726171  | H | 2.890566  | -5.588661 | 4.025813  |
| C | -3.629700 | 8.192900  | 2.247900  | H | 1.080547  | -5.487904 | -0.588590 |
| C | -2.106478 | 8.378422  | 2.196800  | H | 1.794829  | -3.535716 | 3.181279  |
| C | -1.524741 | 7.414449  | 1.162425  | H | 0.734629  | -1.913090 | 1.465915  |
| O | -1.352283 | 6.194274  | 1.585864  | H | -1.860806 | 9.405834  | 1.911792  |
| O | -1.332186 | 7.793301  | -0.001120 | H | -1.672140 | 8.175124  | 3.181103  |
| C | -3.674700 | 5.427900  | 4.897000  | H | -4.078797 | 8.446470  | 1.281672  |
| C | -2.212467 | 5.299161  | 5.350335  | H | -4.395824 | 4.149136  | 6.495624  |
| O | -1.947208 | 5.081232  | 6.539091  | H | -5.560893 | 4.362925  | 5.170341  |
| C | -4.501100 | 4.236800  | 5.411800  | H | -4.067200 | 6.363958  | 5.311359  |
| N | -1.257356 | 5.414003  | 4.391631  | H | 1.278789  | 3.042866  | 2.316841  |
| C | 0.167700  | 5.322300  | 4.718800  | H | 0.581700  | 2.659574  | 3.905236  |
| C | 1.046692  | 4.768817  | 3.588411  | H | -0.413960 | 3.446068  | 2.670379  |
| C | 0.594003  | 3.394461  | 3.093207  | H | 0.251647  | 4.684737  | 5.603192  |
| C | -3.687600 | 5.481300  | -1.233800 | H | -4.360700 | 5.415433  | -2.092070 |
| C | -2.536229 | 4.549228  | -1.403079 | H | -4.266670 | 5.246708  | -0.332826 |
| C | -2.263728 | 3.567924  | -2.325364 | H | -2.851177 | 3.247204  | -3.172730 |
| N | -1.463537 | 4.553569  | -0.535128 | H | 0.324396  | 3.362557  | -0.430576 |
| C | -0.599039 | 3.605888  | -0.931577 | H | -0.394376 | 1.981484  | -2.560716 |
| N | -1.051542 | 2.987265  | -2.017398 | H | -4.087490 | 8.833903  | 3.008833  |
| O | 0.303294  | 1.166609  | -3.025454 | H | -9.269832 | -0.498882 | -2.789826 |



H 3.878334 -0.511240 -6.550400  
H 6.329991 -0.460355 -3.593112  
H 4.132508 3.610346 -3.160521  
H 3.075696 -7.618417 2.588630  
H -0.339815 -7.879190 7.591234  
H 0.559218 6.311503 4.995131  
H -3.884057 -5.407495 5.478645  
H -1.349891 5.206440 0.287522  
H -0.112306 0.278529 -3.097302  
H -0.928871 -6.777372 6.335477  
H -1.506066 5.693614 3.437866  
H 1.759856 -1.032261 -3.888811  
H 3.915022 0.134323 -2.331156  
H 3.867505 -3.454972 1.782699  
C 0.336811 0.052869 1.048399  
C 1.404899 0.021884 -0.068480  
H 2.376569 -0.105543 0.422023  
H 0.457854 0.982283 1.614539  
C -1.109829 -0.026793 0.574775  
C -1.986362 1.043645 0.782758  
C -1.614292 -1.203487 -0.002894  
C -3.328720 0.962460 0.403142  
H -1.617242 1.951076 1.250530  
C -2.955344 -1.287805 -0.378652  
H -0.960744 -2.064436 -0.117228  
C -3.817373 -0.204988 -0.182741  
H -3.989477 1.807676 0.573647  
H -3.335694 -2.207522 -0.815780  
H 1.242060 -0.844986 -0.707539  
H -3.334241 6.512930 -1.138849  
H -3.891629 7.157512 2.475862  
H -3.739163 5.496371 3.807516  
H -7.736213 -1.360320 -2.613980  
H -1.160887 -3.769253 -6.969440  
H 2.049452 4.665554 4.024454  
H -10.104366 -2.285841 -4.358390  
H -4.159367 3.299904 4.960505  
H 1.328844 -6.166813 8.341861  
S 1.511192 -3.283815 7.830776  
C 1.966209 -2.118668 6.494821  
H 2.359348 -1.220962 6.976956  
H 2.744627 -2.547198 5.858294  
H 1.098237 -1.848323 5.888767  
C -8.466748 -4.006313 -5.813484  
H -7.942921 -4.956202 -5.966942  
H -9.521339 -4.164032 -6.072409  
H -8.056911 -3.277786 -6.522063  
C -8.848400 -4.580793 -3.385181  
H -8.695666 -4.289755 -2.341655  
H -9.922850 -4.749774 -3.531732  
H -8.338343 -5.538186 -3.538144  
O 1.203084 5.692839 2.518469  
H 0.322753 5.847856 2.112617  
H -4.861410 -0.276363 -0.475321

**Int2-R-SO-C2-r1**

C 3.153700 -0.283900 -5.877000  
C 2.138804 -1.433104 -5.819870  
O 1.802320 -2.041598 -6.844339  
N 1.659709 -1.728864 -4.583987  
C 0.692400 -2.799000 -4.366000  
C -0.745342 -2.262193 -4.469731  
O -1.065037 -1.221047 -3.869582

C 0.922062 -3.454615 -2.980470  
C 0.144652 -4.739525 -2.789534  
C 0.710311 -5.973188 -3.144513  
C -1.161253 -4.729702 -2.278392  
C -0.007639 -7.161676 -2.998894  
C -1.884154 -5.915462 -2.132721  
C -1.309590 -7.136299 -2.493717  
N -1.652872 -2.951720 -5.197482  
C -1.469700 -4.226500 -5.937300  
C -2.907659 -4.655360 -6.257320  
C -3.658202 -3.322117 -6.399337  
C -3.035113 -2.448775 -5.304267  
C 3.870800 2.794600 -2.546500  
C 5.104715 1.871453 -2.627566  
O 6.221126 2.371905 -2.839006  
C 2.450185 2.281057 -2.926393  
C 1.756024 1.007967 -2.310872  
O 1.442396 1.272678 -0.887253  
O 2.361297 -0.144065 -2.492727  
N 4.912698 0.555764 -2.388243  
C 6.006000 -0.409300 -2.422400  
C 5.541912 -1.830990 -2.821959  
C 5.308445 -2.768120 -1.669546  
C 4.185784 -2.868276 -0.879337  
C 6.252599 -3.724382 -1.145823  
C 5.624890 -4.373034 -0.041401  
C 7.560186 -4.107298 -1.499278  
N 4.370155 -3.829045 0.093512  
C 6.262270 -5.379356 0.695457  
C 8.197901 -5.102272 -0.766929  
C 7.554040 -5.732794 0.320172  
C -3.218000 -4.463600 5.308100  
C -2.525809 -4.455969 4.090938  
C -3.110017 -3.345859 6.143451  
C -1.737389 -3.367099 3.704527  
C -2.329589 -2.251162 5.773487  
C -1.634828 -2.249644 4.550340  
O -0.888314 -1.153491 4.264795  
C 0.019400 -6.789900 7.178200  
C 0.722685 -5.592493 7.828595  
C 0.991907 -4.468162 6.824868  
C -8.689700 -1.843800 -2.938900  
C -8.449324 -3.152548 -3.699265  
C -7.903108 -4.312732 -2.843661  
C 2.761400 -6.532200 2.506200  
C 2.917105 -5.254502 3.057618  
C 1.861799 -6.682504 1.439765  
C 2.208121 -4.155888 2.561406  
C 1.144798 -5.602602 0.937181  
C 1.286115 -4.283317 1.474502  
O 0.615263 -3.277184 0.990558  
C -3.923000 8.167000 1.887200  
C -2.407519 8.403056 1.809030  
C -1.808133 7.411435 0.815531  
O -1.582583 6.218485 1.297098  
O -1.650249 7.730575 -0.369871  
C -3.939900 5.495600 4.631600  
C -2.481910 5.449448 5.113710  
O -2.227942 5.322219 6.317509  
C -4.742300 4.344100 5.261600  
N -1.511677 5.528022 4.165886  
C -0.093600 5.504800 4.534800  
C 0.843422 5.002174 3.428874

|   |           |           |           |   |           |           |           |
|---|-----------|-----------|-----------|---|-----------|-----------|-----------|
| C | 0.488370  | 3.600292  | 2.930357  | H | -0.001834 | 4.867278  | 5.418595  |
| C | -3.823500 | 5.335400  | -1.496600 | H | -4.476502 | 5.191679  | -2.360186 |
| C | -2.636540 | 4.439537  | -1.591258 | H | -4.405829 | 5.128461  | -0.591757 |
| C | -2.321910 | 3.432188  | -2.465782 | H | -2.865120 | 3.044272  | -3.312185 |
| N | -1.584550 | 4.519066  | -0.696758 | H | 0.244507  | 3.384048  | -0.495256 |
| C | -0.677645 | 3.593783  | -1.013009 | H | -0.553278 | 2.115539  | -2.502718 |
| N | -1.099476 | 2.924272  | -2.084964 | H | -4.395346 | 8.837492  | 2.612766  |
| O | 0.459148  | 1.023896  | -3.016639 | H | -9.011540 | -1.048775 | -3.619788 |
| O | 0.624303  | -0.910936 | 1.993309  | H | 4.045659  | -0.635323 | -6.403075 |
| H | 3.426335  | 0.085366  | -4.888787 | H | 6.747163  | -0.034990 | -3.137368 |
| H | 2.725543  | 0.532907  | -6.466603 | H | 4.099501  | 3.654265  | -3.181479 |
| H | 1.994140  | -3.653324 | -2.890994 | H | 3.316174  | -7.380417 | 2.895710  |
| H | 0.662718  | -2.732906 | -2.200680 | H | -0.169573 | -7.579985 | 7.912347  |
| H | 1.726106  | -6.001148 | -3.530920 | H | 0.239782  | 6.510137  | 4.828296  |
| H | -1.610622 | -3.784713 | -1.987468 | H | -3.828278 | -5.314797 | 5.593522  |
| H | 0.452153  | -8.106753 | -3.274016 | H | -1.519671 | 5.224503  | 0.113569  |
| H | -2.891925 | -5.885570 | -1.728220 | H | 0.116233  | 0.109253  | -3.096585 |
| H | -1.868537 | -8.060086 | -2.375225 | H | -0.942127 | -6.493758 | 6.745089  |
| H | 0.866516  | -3.539784 | -5.149500 | H | -1.749135 | 5.754762  | 3.197269  |
| H | -2.958365 | -5.280883 | -7.152117 | H | 1.921049  | -1.119118 | -3.781146 |
| H | -3.314842 | -5.230002 | -5.418216 | H | 3.934531  | 0.199848  | -2.330900 |
| H | -3.465538 | -2.883519 | -7.384843 | H | 3.695045  | -4.063317 | 0.815158  |
| H | -4.740318 | -3.422573 | -6.281766 | C | 0.331888  | 0.132410  | 1.050612  |
| H | -3.028195 | -1.382213 | -5.540658 | C | 1.427821  | 0.111787  | -0.042820 |
| H | -3.550145 | -2.569892 | -4.342883 | H | 2.387929  | 0.030087  | 0.484970  |
| H | -0.942147 | -4.961967 | -5.328574 | H | 0.421523  | 1.071302  | 1.607806  |
| H | 2.436220  | 2.079598  | -4.001961 | C | -1.101509 | 0.023400  | 0.544440  |
| H | 1.770763  | 3.127848  | -2.775883 | C | -2.006515 | 1.071887  | 0.745441  |
| H | 3.854221  | 3.171784  | -1.514536 | C | -1.568094 | -1.153834 | -0.062739 |
| H | 6.310371  | -2.266863 | -3.470534 | C | -3.336451 | 0.971443  | 0.328462  |
| H | 4.640084  | -1.749189 | -3.437459 | H | -1.669963 | 1.975798  | 1.244096  |
| H | 3.261087  | -2.311997 | -0.937822 | C | -2.896571 | -1.257970 | -0.476832 |
| H | 8.067788  | -3.630409 | -2.334039 | H | -0.901691 | -2.006094 | -0.161652 |
| H | 9.207921  | -5.402237 | -1.032981 | C | -3.785100 | -0.195361 | -0.290250 |
| H | 5.756057  | -5.866283 | 1.523713  | H | -4.019626 | 1.799105  | 0.497615  |
| H | 8.076353  | -6.509330 | 0.872297  | H | -3.246629 | -2.178567 | -0.936619 |
| H | 6.514113  | -0.452349 | -1.448959 | H | 1.313723  | -0.790619 | -0.645806 |
| H | -2.592924 | -5.312977 | 3.425517  | H | -3.506231 | 6.381639  | -1.455589 |
| H | -3.637835 | -3.322797 | 7.093498  | H | -4.145047 | 7.139367  | 2.182445  |
| H | -1.199061 | -3.376730 | 2.759451  | H | -3.990132 | 5.448424  | 3.539837  |
| H | -2.244758 | -1.382100 | 6.418955  | H | -7.774309 | -1.502697 | -2.441501 |
| H | -0.427219 | -1.188294 | 3.384409  | H | -0.888331 | -4.045746 | -6.849783 |
| H | 0.107273  | -5.206278 | 8.650669  | H | 1.839650  | 4.961870  | 3.888935  |
| H | 1.625023  | -4.826120 | 6.005767  | H | -4.372041 | 3.374116  | 4.915002  |
| H | 0.054253  | -4.103544 | 6.393636  | O | 0.968544  | 5.932261  | 2.359602  |
| H | 0.628673  | -7.216728 | 6.374079  | H | -9.384668 | -3.476354 | -4.178941 |
| H | -7.740699 | -2.961953 | -4.516424 | C | -7.535065 | -5.510592 | -3.731024 |
| H | -6.981491 | -3.959183 | -2.356853 | H | -7.109047 | -6.328404 | -3.139659 |
| H | -9.463210 | -1.950136 | -2.171694 | H | -8.420983 | -5.901136 | -4.247377 |
| H | 1.720045  | -7.664446 | 0.991143  | H | -6.800936 | -5.231570 | -4.495106 |
| H | 3.608618  | -5.104440 | 3.885107  | C | -8.883203 | -4.740660 | -1.740920 |
| H | 0.453616  | -5.738658 | 0.110319  | H | -9.104750 | -3.924471 | -1.046741 |
| H | 2.342609  | -3.170469 | 3.001395  | H | -9.833228 | -5.077873 | -2.174861 |
| H | 0.673306  | -1.835388 | 1.550625  | H | -8.473660 | -5.570000 | -1.154079 |
| H | -2.200795 | 9.422233  | 1.469583  | H | 1.670617  | -5.918263 | 8.274594  |
| H | -1.954505 | 8.263261  | 2.795784  | C | 2.113683  | -1.950484 | 6.217010  |
| H | -4.389407 | 8.345137  | 0.912492  | H | 1.169941  | -1.665983 | 5.745801  |
| H | -4.646715 | 4.374214  | 6.349196  | H | 2.607037  | -1.054424 | 6.600000  |
| H | -5.802005 | 4.416562  | 4.998706  | H | 2.765713  | -2.425470 | 5.480019  |
| H | -4.361116 | 6.459468  | 4.940753  | S | 1.842555  | -3.057507 | 7.648194  |
| H | 1.208521  | 3.287054  | 2.169467  | H | 0.096010  | 6.016891  | 1.920532  |
| H | 0.506119  | 2.870277  | 3.746499  | H | -4.819054 | -0.282728 | -0.612887 |
| H | -0.513266 | 3.585551  | 2.489851  |   |           |           |           |

## TS3-R-SO-C2-r1

|   |           |           |           |   |            |           |           |
|---|-----------|-----------|-----------|---|------------|-----------|-----------|
| C | 3.159894  | -0.420114 | -5.996893 | O | -0.202733  | 8.837822  | 1.166725  |
| C | 2.154366  | -1.574674 | -5.925583 | C | -3.743997  | 5.515692  | 4.550594  |
| O | 1.832259  | -2.207723 | -6.938282 | C | -2.296997  | 5.267551  | 5.019377  |
| N | 1.655485  | -1.843925 | -4.689595 | O | -2.062015  | 4.864604  | 6.163952  |
| C | 0.660613  | -2.884097 | -4.463432 | C | -4.728901  | 4.588706  | 5.273304  |
| C | -0.759035 | -2.302351 | -4.576029 | N | -1.324585  | 5.527772  | 4.106678  |
| O | -1.038883 | -1.224892 | -4.022193 | C | 0.101300   | 5.449199  | 4.426906  |
| C | 0.888608  | -3.564098 | -3.089991 | C | 0.951856   | 4.698811  | 3.395002  |
| C | 0.148320  | -4.877827 | -2.949402 | C | 0.454607   | 3.275519  | 3.144546  |
| C | 0.723061  | -6.071603 | -3.412865 | C | -3.674525  | 5.342322  | -1.577508 |
| C | -1.131191 | -4.934223 | -2.380664 | C | -2.386688  | 4.625384  | -1.290233 |
| C | 0.037677  | -7.283889 | -3.315335 | C | -1.849936  | 3.461314  | -1.787352 |
| C | -1.821863 | -6.143848 | -2.282967 | N | -1.465603  | 5.087548  | -0.363096 |
| C | -1.239956 | -7.323388 | -2.751568 | C | -0.434256  | 4.233967  | -0.306640 |
| N | -1.691884 | -2.992202 | -5.272806 | N | -0.638706  | 3.235960  | -1.160203 |
| C | -1.540100 | -4.271696 | -6.016688 | O | 0.507622   | 1.133290  | -3.403260 |
| C | -2.988246 | -4.661122 | -6.338124 | O | 0.511408   | -0.914793 | 1.788589  |
| C | -3.698927 | -3.307469 | -6.491572 | H | 3.507066   | -0.102674 | -5.013260 |
| C | -3.055860 | -2.443917 | -5.400010 | H | 2.684468   | 0.428462  | -6.499334 |
| C | 3.960895  | 2.649588  | -2.677400 | H | 1.965175   | -3.740789 | -3.001553 |
| C | 5.142427  | 1.674602  | -2.854080 | H | 0.609825   | -2.878738 | -2.284770 |
| O | 6.234702  | 2.099994  | -3.256129 | H | 1.719331   | -6.049510 | -3.847908 |
| C | 2.526092  | 2.319235  | -3.176528 | H | -1.584963  | -4.021382 | -2.008660 |
| C | 1.726107  | 1.060955  | -2.763208 | H | 0.503556   | -8.197289 | -3.674366 |
| O | 1.160815  | 1.459467  | -1.007584 | H | -2.810330  | -6.164795 | -1.832853 |
| O | 2.286207  | -0.073823 | -2.675356 | H | -1.773046  | -8.266271 | -2.670738 |
| N | 4.962597  | 0.393777  | -2.452450 | H | 0.813687   | -3.622956 | -5.253132 |
| C | 6.033703  | -0.595500 | -2.562500 | H | -3.054054  | -5.290547 | -7.229234 |
| C | 5.568772  | -2.011081 | -2.187974 | H | -3.414203  | -5.218609 | -5.496737 |
| C | 5.418607  | -2.281111 | -0.717931 | H | -3.488539  | -2.881924 | -7.479146 |
| C | 4.257773  | -2.564475 | -0.037678 | H | -4.783924  | -3.375431 | -6.379184 |
| C | 6.483810  | -2.359177 | 0.254600  | H | -3.009181  | -1.381277 | -5.648976 |
| C | 5.884925  | -2.694393 | 1.505317  | H | -3.582494  | -2.534819 | -4.441852 |
| C | 7.881235  | -2.202441 | 0.196703  | H | -1.031099  | -5.021688 | -5.410648 |
| N | 4.529485  | -2.796445 | 1.295731  | H | 2.553905   | 2.240831  | -4.271157 |
| C | 6.640181  | -2.870178 | 2.670913  | H | 1.901832   | 3.190870  | -2.959263 |
| C | 8.634187  | -2.377080 | 1.353160  | H | 3.907856   | 2.869504  | -1.602431 |
| C | 8.018954  | -2.706829 | 2.579147  | H | 6.310351   | -2.705783 | -2.605672 |
| C | -3.212208 | -4.454609 | 5.241405  | H | 4.626907   | -2.227981 | -2.705938 |
| C | -2.551111 | -4.469276 | 4.007259  | H | 3.235641   | -2.628224 | -0.385314 |
| C | -3.066639 | -3.331474 | 6.063563  | H | 8.370433   | -1.952512 | -0.740945 |
| C | -1.756613 | -3.395491 | 3.592727  | H | 9.713516   | -2.257658 | 1.314922  |
| C | -2.279703 | -2.252241 | 5.664389  | H | 6.164630   | -3.127044 | 3.613106  |
| C | -1.615121 | -2.271678 | 4.424439  | H | 8.631722   | -2.836421 | 3.466908  |
| O | -0.856782 | -1.193503 | 4.111513  | H | 6.873779   | -0.290421 | -1.927440 |
| C | -0.007600 | -6.840500 | 7.092801  | H | -2.648419  | -5.330842 | 3.351689  |
| C | 0.457431  | -5.601691 | 7.868088  | H | -3.570043  | -3.292256 | 7.026174  |
| C | 0.860483  | -4.458625 | 6.933445  | H | -1.239964  | -3.421581 | 2.637215  |
| C | -8.690471 | -1.742893 | -2.971388 | H | -2.165162  | -1.379115 | 6.299517  |
| C | -9.784361 | -1.889484 | -1.908133 | H | -0.439996  | -1.229657 | 3.207277  |
| C | -9.587843 | -3.064170 | -0.929434 | H | -0.345505  | -5.261027 | 8.533482  |
| C | 2.705398  | -6.644796 | 2.400899  | H | 1.672015   | -4.776653 | 6.270163  |
| C | 2.510348  | -5.484616 | 3.159305  | H | 0.013551   | -4.150868 | 6.312295  |
| C | 2.282450  | -6.629335 | 1.063905  | H | 0.785749   | -7.220924 | 6.440186  |
| C | 1.920956  | -4.340627 | 2.611345  | H | -10.752425 | -2.015911 | -2.411498 |
| C | 1.699556  | -5.499912 | 0.500145  | H | -9.479094  | -3.980361 | -1.530245 |
| C | 1.495462  | -4.295214 | 1.244996  | H | -7.714946  | -1.518345 | -2.528790 |
| O | 0.974662  | -3.235450 | 0.691128  | H | 2.415378   | -7.517125 | 0.447134  |
| C | -3.694602 | 8.181300  | 1.801400  | H | 2.825641   | -5.465494 | 4.201546  |
| C | -2.372139 | 8.835393  | 2.208638  | H | 1.381161   | -5.511158 | -0.537892 |
| C | -1.136628 | 8.157002  | 1.599327  | H | 1.755034   | -3.460326 | 3.229857  |
| O | -1.168050 | 6.851860  | 1.622353  | H | 0.728560   | -1.796777 | 1.329888  |
|   |           |           |           | H | -2.353258  | 9.896237  | 1.941296  |

H -2.260498 8.779499 3.300876  
H -3.863721 8.275991 0.722406  
H -4.617546 4.689237 6.354845  
H -5.760944 4.829306 5.000297  
H -3.985931 6.564825 4.764710  
H 1.115544 2.772564 2.433812  
H 0.443418 2.693821 4.072718  
H -0.560528 3.281636 2.736245  
H 0.177742 4.950621 5.395666  
H -4.253157 4.786004 -2.317697  
H -4.281617 5.442199 -0.671769  
H -2.239857 2.778175 -2.524400  
H 0.410187 4.353626 0.359392  
H 0.061402 2.346799 -1.165671  
H -4.544365 8.649259 2.310254  
H -8.927458 -0.931999 -3.668110  
H 4.007502 -0.735598 -6.609975  
H 6.416126 -0.599830 -3.592435  
H 4.271788 3.571694 -3.172644  
H 3.166374 -7.526857 2.835138  
H -0.295090 -7.645835 7.776626  
H 0.513128 6.461775 4.540253  
H -3.827586 -5.293970 5.549820  
H -1.515422 5.908123 0.282006  
H 0.103026 0.239022 -3.420909  
H -0.873020 -6.606980 6.463365  
H -1.563346 5.973143 3.215944  
H 1.887430 -1.214996 -3.906891  
H 3.991898 0.076390 -2.332055  
H 3.846602 -3.162582 1.949732  
C 0.106959 0.116224 0.872604  
C 1.254186 0.335371 -0.158078  
H 2.170669 0.395902 0.452670  
H 0.024658 1.025377 1.477444  
C -1.274954 -0.171101 0.297833  
C -2.280309 0.801780 0.358098  
C -1.600165 -1.433430 -0.225454  
C -3.569443 0.544371 -0.114909  
H -2.056137 1.771350 0.792958  
C -2.891076 -1.695643 -0.687370  
H -0.850703 -2.221304 -0.226064  
C -3.879617 -0.708860 -0.642006  
H -4.330648 1.317540 -0.055437  
H -3.137329 -2.682221 -1.070764  
H 1.345360 -0.579180 -0.760287  
H -3.492757 6.348292 -1.970334  
H -3.692278 7.117798 2.042762  
H -3.811499 5.391437 3.465334  
H -8.584454 -2.663328 -3.557592  
H -0.955002 -4.101807 -6.928932  
H 1.957532 4.634455 3.835423  
O 1.112686 5.421152 2.172062  
H 0.328009 5.993029 1.992138  
H -4.543890 3.541471 5.015025  
H -9.862785 -0.956996 -1.330601  
C -10.825771 -3.233957 -0.036432  
H -11.731290 -3.389870 -0.633626  
H -10.716446 -4.089978 0.638430  
H -10.985357 -2.342465 0.582881  
C -8.322580 -2.909286 -0.072524  
H -7.415155 -2.855801 -0.681506  
H -8.372593 -1.995460 0.532659  
H -8.207833 -3.754991 0.614200

H 1.306474 -5.864596 8.511242  
S 1.437565 -2.999135 7.894982  
C 1.899355 -1.873299 6.528112  
H 2.259586 -0.949390 6.985785  
H 2.702842 -2.306157 5.926611  
H 1.041199 -1.646093 5.891281  
H -4.883235 -0.921111 -1.000684

**Prod-R-SO-C2-r1**

C 2.747597 -0.068799 -6.188799  
C 1.650232 -1.132631 -6.153530  
O 1.122789 -1.550650 -7.187106  
N 1.268018 -1.584211 -4.917900  
C 0.063193 -2.403502 -4.770198  
C -1.176385 -1.511824 -4.988726  
O -1.187580 -0.346794 -4.539409  
C 0.052796 -3.073123 -3.373220  
C -1.016901 -4.133326 -3.215052  
C -0.794197 -5.439843 -3.677245  
C -2.252296 -3.835150 -2.624494  
C -1.783199 -6.418825 -3.565353  
C -3.244369 -4.811931 -2.512362  
C -3.015143 -6.105412 -2.985714  
N -2.237065 -2.014395 -5.651357  
C -2.370302 -3.342706 -6.312103  
C -3.851272 -3.388906 -6.707572  
C -4.199646 -1.916677 -6.974769  
C -3.423932 -1.167681 -5.885295  
C 4.091904 2.475999 -2.611097  
C 4.889850 1.334849 -3.254497  
O 5.299770 1.441361 -4.416412  
C 2.756706 2.719555 -3.344454  
C 1.820962 1.523363 -3.382053  
O 1.671206 1.468234 0.168733  
O 2.062858 0.436274 -2.871988  
N 5.115110 0.233117 -2.487682  
C 5.768022 -0.970399 -3.003004  
C 4.922286 -2.254264 -2.906801  
C 4.870213 -2.883390 -1.543730  
C 3.759187 -3.076849 -0.755061  
C 5.977880 -3.473305 -0.826547  
C 5.453698 -3.998612 0.391244  
C 7.350647 -3.635502 -1.094002  
N 4.105627 -3.729685 0.408803  
C 6.257180 -4.661323 1.327050  
C 8.151276 -4.293487 -0.166546  
C 7.609618 -4.800335 1.033680  
C -3.419145 -4.674716 4.943952  
C -2.805658 -4.570794 3.691958  
C -3.066057 -3.769339 5.949415  
C -1.851032 -3.585560 3.435791  
C -2.113358 -2.780502 5.711131  
C -1.494337 -2.681783 4.452873  
O -0.570332 -1.707974 4.280129  
C -0.421872 -7.606118 6.290768  
C 0.480690 -6.673102 7.107284  
C 0.869016 -5.421819 6.316505  
C -8.988000 -0.412600 -2.515100  
C -8.806751 -1.533358 -3.544269  
C -7.802521 -2.631938 -3.141427  
C 2.028131 -7.157917 1.473221  
C 2.073061 -6.060330 2.338521  
C 1.379278 -7.001669 0.240618

|   |           |           |           |   |           |           |           |
|---|-----------|-----------|-----------|---|-----------|-----------|-----------|
| C | 1.497277  | -4.834360 | 1.991031  | H | -6.845706 | -2.137816 | -2.913224 |
| C | 0.804554  | -5.790207 | -0.124066 | H | -9.412896 | -0.781654 | -1.576331 |
| C | 0.841690  | -4.648073 | 0.732811  | H | 1.326362  | -7.842108 | -0.449762 |
| O | 0.310295  | -3.514646 | 0.361542  | H | 2.570805  | -6.155051 | 3.302363  |
| C | -2.589612 | 8.254801  | 2.977110  | H | 0.305111  | -5.682957 | -1.082345 |
| C | -1.306808 | 8.868644  | 2.407945  | H | 1.528969  | -3.998681 | 2.686129  |
| C | -0.057010 | 8.015260  | 2.679138  | H | 0.436754  | -2.359841 | 1.235520  |
| O | -0.206014 | 6.743961  | 2.457588  | H | -1.406163 | 8.974822  | 1.318383  |
| O | 0.983906  | 8.555266  | 3.073932  | H | -1.134129 | 9.870785  | 2.812328  |
| C | -2.801201 | 5.303701  | 5.408400  | H | -2.759134 | 7.260812  | 2.556727  |
| C | -1.367931 | 4.859253  | 5.743202  | H | -3.673638 | 3.925853  | 6.836970  |
| O | -1.128413 | 4.263263  | 6.800863  | H | -4.835942 | 4.552639  | 5.645824  |
| C | -3.807499 | 4.207496  | 5.790392  | H | -3.005698 | 6.213855  | 5.986655  |
| N | -0.415942 | 5.156264  | 4.824151  | H | 1.385493  | 2.474446  | 2.460581  |
| C | 0.996000  | 4.824108  | 5.011685  | H | 0.810420  | 2.172077  | 4.119294  |
| C | 1.658710  | 4.149503  | 3.801947  | H | -0.131179 | 3.193714  | 3.019209  |
| C | 0.884606  | 2.921360  | 3.321927  | H | 1.046090  | 4.163002  | 5.879845  |
| C | -3.096116 | 5.853153  | -0.690729 | H | -3.766517 | 5.485442  | -1.471791 |
| C | -1.858847 | 5.009957  | -0.638607 | H | -3.644325 | 5.831566  | 0.258705  |
| C | -1.452561 | 3.907904  | -1.360015 | H | -1.985236 | 3.406056  | -2.156594 |
| N | -0.830203 | 5.246382  | 0.251503  | H | 1.023940  | 4.267701  | 0.638070  |
| C | 0.123274  | 4.304798  | 0.041188  | H | 0.907595  | 1.806924  | -0.339882 |
| N | -0.212789 | 3.468223  | -0.930240 | H | -3.463157 | 8.876617  | 2.751013  |
| O | 0.707818  | 1.760421  | -4.083047 | H | -9.660016 | 0.363937  | -2.895444 |
| O | 0.524190  | -1.564395 | 1.917171  | H | 3.324448  | -0.200744 | -7.105646 |
| H | 3.415916  | -0.092977 | -5.328859 | H | 6.000292  | -0.751717 | -4.047185 |
| H | 2.269757  | 0.915272  | -6.229656 | H | 4.697546  | 3.383368  | -2.682499 |
| H | 1.040700  | -3.523002 | -3.230916 | H | 2.481466  | -8.104954 | 1.750549  |
| H | -0.064976 | -2.305873 | -2.602762 | H | -0.698198 | -8.492416 | 6.871367  |
| H | 0.164701  | -5.691632 | -4.123923 | H | 1.563025  | 5.734785  | 5.248762  |
| H | -2.432824 | -2.836215 | -2.237509 | H | -4.163365 | -5.443198 | 5.130614  |
| H | -1.589487 | -7.425517 | -3.924673 | H | -0.772592 | 5.950949  | 1.007352  |
| H | -4.193052 | -4.563125 | -2.045168 | H | 0.139131  | 0.948814  | -4.119475 |
| H | -3.784940 | -6.866096 | -2.893638 | H | -1.344459 | -7.097773 | 5.990309  |
| H | 0.104013  | -3.172166 | -5.544370 | H | -0.643496 | 5.724377  | 4.006183  |
| H | -4.022346 | -4.039651 | -7.568704 | H | 1.571449  | -1.056691 | -4.100967 |
| H | -4.444864 | -3.771413 | -5.870343 | H | 4.633348  | 0.167681  | -1.601931 |
| H | -3.839788 | -1.616828 | -7.965279 | H | 3.431031  | -4.085520 | 1.079818  |
| H | -5.272553 | -1.713431 | -6.930445 | C | 0.328207  | -0.276744 | 1.327332  |
| H | -3.111054 | -0.162394 | -6.174731 | C | 1.542340  | 0.082099  | 0.454520  |
| H | -4.004715 | -1.082138 | -4.958544 | H | 2.430049  | -0.196901 | 1.030220  |
| H | -2.091051 | -4.149451 | -5.635609 | H | 0.323795  | 0.432487  | 2.163162  |
| H | 2.942112  | 3.017435  | -4.382075 | C | -1.032959 | -0.175380 | 0.640839  |
| H | 2.208914  | 3.543346  | -2.874476 | C | -2.184740 | -0.178026 | 1.444622  |
| H | 3.887012  | 2.277694  | -1.554828 | C | -1.195595 | -0.102210 | -0.747414 |
| H | 5.364199  | -2.970138 | -3.614479 | C | -3.457237 | -0.114372 | 0.880351  |
| H | 3.909725  | -2.048487 | -3.268954 | H | -2.072855 | -0.235019 | 2.524025  |
| H | 2.724261  | -2.817300 | -0.930085 | C | -2.470786 | -0.032864 | -1.320518 |
| H | 7.783426  | -3.259456 | -2.017105 | H | -0.330410 | -0.083753 | -1.402047 |
| H | 9.211218  | -4.422269 | -0.367616 | C | -3.604907 | -0.041511 | -0.508436 |
| H | 5.834746  | -5.056891 | 2.246009  | H | -4.333616 | -0.117009 | 1.522762  |
| H | 8.259108  | -5.310314 | 1.739564  | H | -2.560141 | 0.029618  | -2.401113 |
| H | 6.719665  | -1.118364 | -2.478631 | H | 1.552149  | -0.519853 | -0.464528 |
| H | -3.070143 | -5.265808 | 2.899200  | H | -2.866697 | 6.902426  | -0.911728 |
| H | -3.535278 | -3.831974 | 6.927935  | H | -2.528670 | 8.152775  | 4.065683  |
| H | -1.380098 | -3.510423 | 2.460187  | H | -2.888479 | 5.568415  | 4.351028  |
| H | -1.833237 | -2.072502 | 6.485311  | H | -8.029743 | 0.064973  | -2.279725 |
| H | -0.174417 | -1.727717 | 3.353282  | H | -1.717859 | -3.377295 | -7.193227 |
| H | -0.033347 | -6.376277 | 8.029997  | H | 2.644855  | 3.814374  | 4.156337  |
| H | 1.400598  | -5.699642 | 5.400219  | O | 1.926541  | 5.063166  | 2.741823  |
| H | -0.022552 | -4.854876 | 6.031328  | H | 1.185707  | 5.714718  | 2.660768  |
| H | 0.082158  | -7.945226 | 5.379168  | H | -3.661448 | 3.311410  | 5.178761  |
| H | -8.474161 | -1.091660 | -4.493215 | H | -9.779682 | -2.002060 | -3.752868 |

C -7.562859 -3.598383 -4.310298  
H -7.209767 -3.067399 -5.201580  
H -6.815412 -4.356669 -4.052321  
H -8.488035 -4.122623 -4.581265  
C -8.245242 -3.401534 -1.888172  
H -8.351775 -2.746346 -1.018506  
H -9.211097 -3.894823 -2.056358  
H -7.517205 -4.177511 -1.627650  
H 1.387677 -7.209164 7.413116  
S 1.960895 -4.324638 7.313208  
C 2.328272 -3.026899 6.076110  
H 1.412952 -2.557776 5.707228  
H 2.940969 -2.274255 6.577114  
H 2.893183 -3.441600 5.237285  
H -4.596056 0.014200 -0.950618

**RC-R-SO-C1-r3**

C 2.032900 0.816100 -6.542800  
C 1.108572 -0.398788 -6.469785  
O 0.821196 -1.050229 -7.480703  
N 0.615696 -0.700100 -5.235344  
C -0.344800 -1.784800 -5.041400  
C -1.779750 -1.214814 -5.018779  
O -2.033232 -0.210503 -4.335126  
C -0.046379 -2.503132 -3.700561  
C -0.914159 -3.718957 -3.457563  
C -0.528504 -4.978754 -3.941644  
C -2.129087 -3.615631 -2.764491  
C -1.334637 -6.101973 -3.744966  
C -2.939097 -4.735889 -2.567812  
C -2.545470 -5.982965 -3.058406  
N -2.750634 -1.834858 -5.724206  
C -2.646900 -3.060100 -6.542400  
C -4.112538 -3.435528 -6.803525  
C -4.830873 -2.077116 -6.822277  
C -4.120686 -1.289640 -5.715190  
C 3.061400 3.613300 -3.049900  
C 4.270928 2.681369 -3.235505  
O 5.403107 3.155404 -3.396784  
C 1.652653 3.028289 -3.274175  
C 1.292220 1.895337 -2.286830  
O 1.088739 2.214705 -1.089768  
O 1.292084 0.698089 -2.740480  
N 4.055875 1.341770 -3.179177  
C 5.145000 0.386900 -3.346600  
C 4.650003 -1.068580 -3.313273  
C 4.494795 -1.639589 -1.933698  
C 3.377006 -1.612090 -1.134939  
C 5.526300 -2.298988 -1.170313  
C 4.955878 -2.653545 0.085923  
C 6.869802 -2.632905 -1.421990  
N 3.654214 -2.206343 0.082043  
C 5.682726 -3.332274 1.071251  
C 7.596366 -3.303731 -0.444432  
C 7.007353 -3.651481 0.789926  
C -3.510000 -4.169500 4.753500  
C -3.037677 -3.764399 3.505399  
C -2.873815 -3.708050 5.909805  
C -1.933658 -2.918283 3.402608  
C -1.769482 -2.861972 5.822641  
C -1.290482 -2.471649 4.565261  
O -0.181387 -1.674364 4.532493  
C -0.175300 -6.670800 6.172000

C 0.498950 -5.735863 7.181768  
C 1.422268 -4.728360 6.494475  
C -9.567700 -0.846300 -2.801400  
C -9.059326 -2.235308 -2.399661  
C -7.747146 -2.240024 -1.590498  
C 2.195000 -6.072900 1.331100  
C 2.106942 -4.978979 2.192183  
C 1.470853 -6.055783 0.134844  
C 1.317947 -3.871542 1.865070  
C 0.682810 -4.959965 -0.206816  
C 0.609758 -3.853814 0.652398  
O -0.162943 -2.804434 0.256880  
C -4.268700 8.699400 2.397500  
C -3.092064 8.918275 1.445812  
C -2.067025 7.775670 1.495198  
O -2.534888 6.586421 1.573040  
O -0.850622 8.079250 1.462116  
C -4.114900 5.819000 4.916900  
C -2.627697 5.711582 5.288587  
O -2.295236 5.440610 6.451114  
C -4.855300 4.508600 5.231800  
N -1.732252 5.912881 4.289772  
C -0.288300 5.795200 4.515400  
C 0.539211 5.301967 3.307833  
C -0.146128 4.171556 2.535700  
C -4.482800 6.144100 -1.194600  
C -3.337166 5.282853 -1.601789  
C -3.085060 4.548719 -2.736093  
N -2.237686 5.083459 -0.792575  
C -1.384228 4.254515 -1.450602  
N -1.866329 3.908985 -2.636336  
O -1.170062 2.482802 -5.078267  
O 0.133814 -0.650327 1.981598  
H 2.662683 0.915123 -5.656178  
H 1.414134 1.716912 -6.617360  
H 1.008540 -2.794703 -3.718380  
H -0.167266 -1.774140 -2.893393  
H 0.415766 -5.078876 -4.471452  
H -2.436582 -2.649671 -2.374017  
H -1.015038 -7.068845 -4.123614  
H -3.875003 -4.634929 -2.025492  
H -3.172693 -6.855638 -2.900819  
H -0.213307 -2.471860 -5.878209  
H -4.231687 -4.005023 -7.728712  
H -4.487813 -4.048591 -5.976715  
H -4.680836 -1.583989 -7.789228  
H -5.906981 -2.156220 -6.648595  
H -4.094093 -0.210904 -5.884556  
H -4.581580 -1.458400 -4.733562  
H -2.105855 -3.845579 -6.012371  
H 1.538900 2.672593 -4.298979  
H 0.930233 3.837093 -3.135419  
H 3.127141 4.003182 -2.025894  
H 5.374534 -1.675868 -3.868288  
H 3.707337 -1.139888 -3.868836  
H 2.406803 -1.178671 -1.342017  
H 7.335372 -2.370130 -2.368319  
H 8.634482 -3.565107 -0.630146  
H 5.227071 -3.600415 2.019765  
H 7.598778 -4.176803 1.534597  
H 5.904377 0.545036 -2.571025  
H -3.525098 -4.110345 2.598371  
H -3.238582 -4.007718 6.888294

H -1.569117 -2.624664 2.424773  
H -1.265481 -2.498445 6.712595  
H 0.003145 -1.378583 3.615896  
H -0.268451 -5.193798 7.746736  
H 2.233377 -5.244683 5.968805  
H 0.861218 -4.139354 5.763156  
H 0.566314 -7.229202 5.589713  
H -8.908118 -2.833778 -3.308019  
H -6.992725 -1.697126 -2.180085  
H -9.827556 -0.237402 -1.929877  
H 1.524746 -6.901766 -0.544843  
H 2.651127 -4.979011 3.132480  
H 0.127342 -4.934530 -1.137400  
H 1.242147 -3.037354 2.555321  
H -0.033340 -2.025079 0.839276  
H -3.461843 8.990273 0.413416  
H -2.573607 9.857556 1.661446  
H -4.785855 7.767814 2.158512  
H -4.700450 4.229372 6.277327  
H -5.930044 4.614396 5.054562  
H -4.536758 6.635315 5.514715  
H 0.527967 3.792247 1.764201  
H -0.410934 3.345196 3.203978  
H -1.058701 4.531282 2.055239  
H -0.164438 5.101993 5.352939  
H -5.287930 6.068244 -1.930475  
H -4.881275 5.850709 -0.218121  
H -3.709856 4.442797 -3.612933  
H -0.445193 3.902429 -1.041798  
H -1.288793 2.967275 -4.233112  
H -4.990273 9.521946 2.333953  
H -10.463707 -0.922456 -3.426570  
H 2.650436 0.733207 -7.437889  
H 5.642176 0.586359 -4.305320  
H 3.233988 4.463796 -3.716140  
H 2.812460 -6.927436 1.589253  
H -0.815954 -7.398553 6.680749  
H 0.132398 6.759367 4.832152  
H -4.368694 -4.829720 4.827500  
H -2.125283 5.530994 0.129594  
H -1.342807 1.560848 -4.824567  
H -0.799063 -6.107487 5.471027  
H -2.067960 6.124071 3.345532  
H 0.817523 -0.088760 -4.433344  
H 3.106120 0.974784 -3.084303  
H 2.969231 -2.419648 0.791725  
C -0.632839 0.585578 2.033651  
C 0.762088 0.631912 1.573729  
H -1.435052 0.652626 1.303430  
H -0.882449 0.899777 3.043900  
C 4.096112 2.106943 3.836665  
C 3.056242 1.450367 4.501571  
C 4.039006 2.270695 2.451768  
C 1.964003 0.960380 3.787026  
H 3.094474 1.321578 5.579305  
C 2.950879 1.775120 1.731329  
H 4.841403 2.782692 1.929146  
C 1.904332 1.118823 2.394466  
H 1.164356 0.454052 4.318552  
H 2.886880 1.912466 0.655783  
H 0.897676 0.719639 0.496579  
H -4.196661 7.199520 -1.118989  
H -3.928527 8.635696 3.436362

H -4.232007 6.084132 3.862700  
H -8.809698 -0.298912 -3.373625  
H -2.115763 -2.844195 -7.478209  
H 1.462826 4.899707 3.747402  
O 0.976269 6.346720 2.457584  
H 0.211515 6.835224 2.062199  
H -4.488355 3.690306 4.603611  
H -9.834923 -2.756434 -1.819452  
C -7.241557 -3.676505 -1.392280  
H -6.289523 -3.690902 -0.850181  
H -7.960925 -4.268290 -0.812267  
H -7.090558 -4.183864 -2.351631  
C -7.887784 -1.527892 -0.236857  
H -8.172001 -0.477485 -0.350529  
H -8.651214 -2.016603 0.381937  
H -6.944060 -1.554208 0.318285  
H 1.071091 -6.323129 7.910931  
C 2.930419 -2.367828 6.560328  
H 3.374038 -1.574558 7.165484  
H 3.716705 -2.846362 5.970996  
H 2.176271 -1.938821 5.896580  
S 2.155745 -3.559289 7.712015  
H 4.944250 2.489543 4.396963

**TS1-R-SO-C1-r3**

C 2.418696 0.216904 -6.166503  
C 1.496955 -0.996808 -6.083996  
O 1.221156 -1.660206 -7.089144  
N 0.990631 -1.289263 -4.850189  
C 0.041002 -2.384111 -4.665199  
C -1.398509 -1.832550 -4.612806  
O -1.655038 -0.846493 -3.903327  
C 0.360776 -3.157669 -3.360319  
C -0.444965 -4.429114 -3.198422  
C 0.025934 -5.641597 -3.724026  
C -1.685056 -4.423284 -2.544068  
C -0.721816 -6.815240 -3.605661  
C -2.438222 -5.592964 -2.427475  
C -1.959682 -6.793364 -2.958544  
N -2.368423 -2.449078 -5.322570  
C -2.261102 -3.659299 -6.166104  
C -3.725705 -4.050792 -6.406876  
C -4.462550 -2.702437 -6.392342  
C -3.746110 -1.923825 -5.283078  
C 3.446822 3.013894 -2.673169  
C 4.646377 2.077217 -2.882047  
O 5.774019 2.554409 -3.056873  
C 2.017341 2.442475 -2.795663  
C 1.687295 1.303196 -1.806891  
O 1.491975 1.623210 -0.597708  
O 1.686988 0.110747 -2.254508  
N 4.431839 0.735805 -2.828908  
C 5.530748 -0.212585 -2.970293  
C 5.050975 -1.633627 -3.341196  
C 4.889093 -2.568813 -2.176689  
C 3.755044 -2.803937 -1.435307  
C 5.924262 -3.391839 -1.600477  
C 5.338573 -4.104520 -0.514290  
C 7.283279 -3.605586 -1.896772  
N 4.018351 -3.724979 -0.441176  
C 6.068758 -5.011721 0.263638  
C 8.012038 -4.502809 -1.124582  
C 7.409736 -5.198847 -0.054266

|   |           |           |           |   |            |           |           |
|---|-----------|-----------|-----------|---|------------|-----------|-----------|
| C | -3.124193 | -4.768599 | 5.129702  | H | 2.770813   | -2.371544 | -1.545194 |
| C | -2.720788 | -4.571458 | 3.806396  | H | 7.758535   | -3.074969 | -2.717733 |
| C | -2.603834 | -3.934676 | 6.125282  | H | 9.062123   | -4.673205 | -1.345189 |
| C | -1.808724 | -3.568758 | 3.472859  | H | 5.599151   | -5.551103 | 1.080553  |
| C | -1.690834 | -2.929800 | 5.808304  | H | 8.004083   | -5.894753 | 0.531148  |
| C | -1.279153 | -2.741041 | 4.477812  | H | 6.127301   | -0.250849 | -2.049242 |
| O | -0.373016 | -1.763707 | 4.229802  | H | -3.116578  | -5.205964 | 3.017742  |
| C | 0.210430  | -7.269999 | 6.548158  | H | -2.910226  | -4.065937 | 7.159756  |
| C | 1.013715  | -6.211845 | 7.313479  | H | -1.498682  | -3.431047 | 2.442164  |
| C | 1.490817  | -5.086159 | 6.393596  | H | -1.282393  | -2.281211 | 6.577222  |
| C | -9.181999 | -1.445600 | -2.425099 | H | -0.141699  | -1.702062 | 3.258041  |
| C | -8.443696 | -2.768141 | -2.191396 | H | 0.394953   | -5.788352 | 8.113958  |
| C | -7.104530 | -2.642661 | -1.437988 | H | 2.140676   | -5.484209 | 5.606638  |
| C | 2.580797  | -6.672004 | 1.707407  | H | 0.635910   | -4.598609 | 5.915383  |
| C | 2.551886  | -5.430686 | 2.346998  | H | 0.810070   | -7.723304 | 5.751124  |
| C | 1.726427  | -6.892610 | 0.620967  | H | -8.251350  | -3.242659 | -3.163054 |
| C | 1.693148  | -4.416126 | 1.910510  | H | -6.476034  | -1.931834 | -1.996092 |
| C | 0.864090  | -5.894908 | 0.174024  | H | -9.485453  | -0.974065 | -1.485205 |
| C | 0.840257  | -4.640656 | 0.811938  | H | 1.735325   | -7.852506 | 0.111416  |
| O | -0.006474 | -3.701272 | 0.337639  | H | 3.207030   | -5.238852 | 3.192499  |
| C | -3.882900 | 8.100200  | 2.773800  | H | 0.205787   | -6.060218 | -0.672119 |
| C | -2.671965 | 8.321619  | 1.866258  | H | 1.675523   | -3.453636 | 2.410998  |
| C | -1.667212 | 7.162347  | 1.924917  | H | 0.109719   | -2.823264 | 0.819433  |
| O | -2.157985 | 5.980581  | 1.975227  | H | -3.005648  | 8.419833  | 0.823670  |
| O | -0.444972 | 7.442737  | 1.928058  | H | -2.147332  | 9.248470  | 2.117958  |
| C | -3.729199 | 5.219799  | 5.293200  | H | -4.401757  | 7.179148  | 2.500636  |
| C | -2.244039 | 5.116322  | 5.675372  | H | -4.322773  | 3.635053  | 6.656094  |
| O | -1.916554 | 4.852602  | 6.840710  | H | -5.542981  | 4.012373  | 5.421721  |
| C | -4.469500 | 3.909401  | 5.608100  | H | -4.156592  | 6.037568  | 5.885184  |
| N | -1.347151 | 5.315691  | 4.677442  | H | 0.820589   | 3.013433  | 2.251399  |
| C | 0.097399  | 5.196001  | 4.891700  | H | -0.118804  | 2.673245  | 3.722497  |
| C | 0.893820  | 4.607858  | 3.704694  | H | -0.740905  | 3.811950  | 2.514476  |
| C | 0.165940  | 3.453827  | 3.007473  | H | 0.223391   | 4.560614  | 5.773105  |
| C | -4.097300 | 5.544699  | -0.818200 | H | -4.881803  | 5.478128  | -1.576802 |
| C | -2.952493 | 4.666378  | -1.189391 | H | -4.528828  | 5.259525  | 0.146757  |
| C | -2.684686 | 3.911524  | -2.306684 | H | -3.292551  | 3.796352  | -3.194129 |
| N | -1.871360 | 4.471462  | -0.355565 | H | -0.083687  | 3.281516  | -0.548625 |
| C | -1.012906 | 3.626191  | -0.982933 | H | -0.890786  | 2.322850  | -3.758332 |
| N | -1.473258 | 3.263955  | -2.172530 | H | -4.592245  | 8.932529  | 2.700646  |
| O | -0.764902 | 1.843088  | -4.605395 | H | -10.087901 | -1.602162 | -3.020392 |
| O | 0.258582  | -1.489301 | 1.673759  | H | 3.053199   | 0.114205  | -7.047387 |
| H | 3.032822  | 0.342039  | -5.272021 | H | 6.195442   | 0.177520  | -3.748095 |
| H | 1.800515  | 1.114649  | -6.275505 | H | 3.579733   | 3.837440  | -3.380718 |
| H | 1.428331  | -3.396927 | -3.383168 | H | 3.251116   | -7.453707 | 2.050691  |
| H | 0.192303  | -2.488655 | -2.510778 | H | -0.118215  | -8.072251 | 7.216973  |
| H | 0.990682  | -5.665421 | -4.225071 | H | 0.535604   | 6.174308  | 5.131420  |
| H | -2.054457 | -3.496824 | -2.114701 | H | -3.835954  | -5.549301 | 5.379830  |
| H | -0.336310 | -7.744835 | -4.015044 | H | -1.771064  | 4.931509  | 0.563723  |
| H | -3.395047 | -5.568040 | -1.913648 | H | -0.968412  | 0.923296  | -4.366285 |
| H | -2.542926 | -7.704720 | -2.862634 | H | -0.680351  | -6.829990 | 6.087217  |
| H | 0.169027  | -3.041577 | -5.525952 | H | -1.686232  | 5.514283  | 3.731877  |
| H | -3.853541 | -4.608397 | -7.338108 | H | 1.178702   | -0.675298 | -4.052706 |
| H | -4.077068 | -4.680758 | -5.582315 | H | 3.490018   | 0.369291  | -2.685538 |
| H | -4.333908 | -2.191639 | -7.353159 | H | 3.349297   | -4.044550 | 0.247469  |
| H | -5.534638 | -2.798954 | -6.203429 | C | -0.071314  | -0.207593 | 1.156786  |
| H | -3.737825 | -0.842057 | -5.434153 | C | 1.340801   | -0.212817 | 0.783242  |
| H | -4.188858 | -2.116261 | -4.297483 | H | -0.773556  | -0.213595 | 0.318036  |
| H | -1.699106 | -4.444851 | -5.659319 | H | -0.384255  | 0.512857  | 1.918485  |
| H | 1.821544  | 2.088166  | -3.808861 | C | 4.645677   | 0.822069  | 3.282538  |
| H | 1.319263  | 3.262000  | -2.606995 | C | 3.353974   | 0.823914  | 3.817664  |
| H | 3.577154  | 3.445063  | -1.672327 | C | 4.843372   | 0.472867  | 1.944710  |
| H | 5.784859  | -2.063672 | -4.032538 | C | 2.263099   | 0.489603  | 3.018984  |
| H | 4.114799  | -1.562591 | -3.906091 | H | 3.196299   | 1.085446  | 4.859559  |



C 3.755480 0.127442 1.146689  
H 5.844145 0.466354 1.523868  
C 2.450843 0.141144 1.669820  
H 1.270025 0.470550 3.452612  
H 3.907234 -0.138162 0.105600  
H 1.571342 -0.706830 -0.150241  
H -3.797956 6.595986 -0.736734  
H -3.578772 8.014318 3.822073  
H -3.839427 5.480613 4.237270  
H -8.549956 -0.730976 -2.965026  
H -1.750677 -3.417320 -7.106947  
H 1.814511 4.205563 4.150918  
O 1.341467 5.588465 2.785124  
H 0.587887 6.132954 2.445495  
H -4.095893 3.088953 4.986775  
H -9.096631 -3.460624 -1.640096  
C -6.372983 -3.992754 -1.410540  
H -5.403455 -3.907748 -0.907654  
H -6.961328 -4.745572 -0.870971  
H -6.195266 -4.372295 -2.423004  
C -7.279795 -2.096621 -0.013036  
H -7.729263 -1.099146 -0.006090  
H -7.923417 -2.758214 0.580764  
H -6.314696 -2.025342 0.499596  
H 1.877894 -6.680779 7.800299  
C 2.763856 -2.608319 6.004983  
H 3.270525 -1.756932 6.464209  
H 3.421247 -3.043197 5.247844  
H 1.836205 -2.266596 5.539439  
S 2.420810 -3.811595 7.340444  
H 5.493267 1.087970 3.907278

**Int1-R-SO-C1-r3**

C 2.293000 0.157200 -6.280400  
C 1.357548 -1.047242 -6.219126  
O 1.141371 -1.753759 -7.206847  
N 0.778504 -1.285595 -5.003439  
C -0.218700 -2.334600 -4.813400  
C -1.620660 -1.697808 -4.726419  
O -1.802068 -0.716156 -3.986434  
C 0.076929 -3.143834 -3.524078  
C -0.837368 -4.337274 -3.342838  
C -0.504357 -5.580705 -3.900861  
C -2.043245 -4.224052 -2.635944  
C -1.354087 -6.679854 -3.762540  
C -2.896785 -5.320427 -2.497647  
C -2.555755 -6.551735 -3.061876  
N -2.636234 -2.228386 -5.437646  
C -2.618200 -3.421100 -6.311000  
C -4.107764 -3.728530 -6.516173  
C -4.769343 -2.342754 -6.455752  
C -3.979874 -1.623794 -5.355217  
C 3.545100 2.782600 -2.727400  
C 4.654618 1.769791 -3.033549  
O 5.793996 2.183081 -3.266628  
C 2.061707 2.335374 -2.605461  
C 1.774798 1.102323 -1.763698  
O 1.891130 1.294631 -0.443465  
O 1.503292 0.009792 -2.253721  
N 4.372192 0.442716 -2.977900  
C 5.419800 -0.556200 -3.150000  
C 4.862684 -1.987065 -3.314461  
C 4.763136 -2.786712 -2.046545

C 3.628603 -3.157615 -1.362858  
C 5.872713 -3.358466 -1.321465  
C 5.327979 -4.060879 -0.207727  
C 7.267886 -3.360059 -1.506700  
N 3.960868 -3.921236 -0.262707  
C 6.134096 -4.747170 0.709100  
C 8.071187 -4.039835 -0.598070  
C 7.508940 -4.725499 0.500197  
C -3.380100 -4.802900 4.962100  
C -2.776935 -4.676436 3.704863  
C -3.123089 -3.823080 5.927706  
C -1.930401 -3.604181 3.405001  
C -2.282130 -2.747274 5.645937  
C -1.675641 -2.627311 4.382519  
O -0.861871 -1.560169 4.184908  
C -0.186700 -7.545600 6.254100  
C 0.626435 -6.500308 7.027446  
C 0.923833 -5.260704 6.179808  
C -9.331500 -0.894000 -2.394200  
C -8.642825 -2.236831 -2.126904  
C -7.314676 -2.144814 -1.349596  
C 2.143900 -6.954500 1.392900  
C 2.295555 -5.837159 2.221997  
C 1.312368 -6.833819 0.270411  
C 1.645369 -4.630038 1.944067  
C 0.657515 -5.642302 -0.021046  
C 0.795797 -4.481815 0.802523  
O 0.180356 -3.369610 0.506604  
C -3.372200 8.151200 2.981600  
C -1.977980 8.183461 2.348761  
C -1.301335 6.806082 2.267819  
O -2.077370 5.791585 2.234712  
O -0.044641 6.757901 2.234684  
C -3.360200 5.195000 5.416200  
C -1.886070 5.064523 5.834543  
O -1.562230 5.012977 7.028329  
C -4.163000 3.930700 5.770700  
N -1.002850 5.003949 4.808686  
C 0.451100 4.946400 4.950500  
C 1.067950 3.882990 4.030251  
C 0.645899 2.469325 4.421249  
C -3.798500 5.719400 -0.676600  
C -2.725582 4.720592 -0.968104  
C -2.402544 4.011549 -2.102805  
N -1.791810 4.336883 -0.028670  
C -0.961076 3.441961 -0.615247  
N -1.297656 3.213695 -1.878377  
O -0.618122 1.885568 -4.375434  
O 0.547799 -1.285943 1.871286  
H 3.030748 0.139511 -5.473630  
H 1.706633 1.075971 -6.171310  
H 1.117226 -3.478225 -3.586447  
H -0.001550 -2.471510 -2.663820  
H 0.433345 -5.688447 -4.440702  
H -2.306826 -3.272454 -2.182880  
H -1.074861 -7.635956 -4.196304  
H -3.822950 -5.214039 -1.940279  
H -3.216070 -7.406654 -2.948448  
H -0.137857 -2.983704 -5.685743  
H -4.291282 -4.259322 -7.453703  
H -4.469555 -4.355609 -5.694076  
H -4.642016 -1.821817 -7.411295  
H -5.838901 -2.385023 -6.235668

H -3.912709 -0.542176 -5.492570  
H -4.405526 -1.804834 -4.360422  
H -2.084687 -4.247115 -5.838677  
H 1.623210 2.131304 -3.582931  
H 1.501567 3.172012 -2.178830  
H 3.857802 3.260726 -1.791948  
H 5.529402 -2.514089 -4.008286  
H 3.888120 -1.945896 -3.815178  
H 2.591581 -2.937947 -1.573429  
H 7.714122 -2.837839 -2.348993  
H 9.149263 -4.045263 -0.732481  
H 5.696583 -5.280872 1.547454  
H 8.161712 -5.247883 1.193872  
H 6.113857 -0.516301 -2.302030  
H -2.962120 -5.425134 2.938745  
H -3.580444 -3.894338 6.911263  
H -1.463603 -3.520408 2.425863  
H -2.080082 -1.985347 6.392727  
H -0.444358 -1.532234 3.282990  
H 0.078443 -6.200653 7.929414  
H 1.484596 -5.536083 5.280228  
H -0.005578 -4.776730 5.863888  
H 0.354588 -7.889416 5.365893  
H -8.448350 -2.732467 -3.087564  
H -6.651938 -1.464430 -1.906050  
H -9.636671 -0.398693 -1.467172  
H 1.176659 -7.686676 -0.392599  
H 2.936746 -5.899837 3.099837  
H 0.019304 -5.564320 -0.895963  
H 1.773674 -3.774014 2.601742  
H 0.441091 -2.149923 1.294271  
H -2.042427 8.569199 1.321038  
H -1.308660 8.864874 2.884617  
H -4.016980 7.446198 2.453623  
H -4.067248 3.701784 6.836136  
H -5.224503 4.066428 5.541320  
H -3.766617 6.052676 5.964286  
H 1.094498 1.735443 3.748363  
H 0.969859 2.238068 5.441611  
H -0.442096 2.368057 4.370755  
H 0.680085 4.728152 5.996362  
H -4.434104 5.850132 -1.556376  
H -4.433292 5.402562 0.157846  
H -2.898151 4.029587 -3.064163  
H -0.131220 2.993118 -0.088513  
H -0.758295 2.301334 -3.496644  
H -3.839699 9.142270 2.952788  
H -10.230617 -1.028869 -3.004930  
H 2.799109 0.158491 -7.245438  
H 6.001101 -0.277774 -4.035655  
H 3.604462 3.555887 -3.497635  
H 2.656332 -7.886116 1.612999  
H -0.397082 -8.419835 6.878859  
H 0.877071 5.926809 4.701474  
H -4.037109 -5.639252 5.179654  
H -1.740565 4.727753 0.933100  
H -0.981408 0.990388 -4.258642  
H -1.143691 -7.130624 5.919795  
H -1.365965 5.078244 3.857154  
H 0.904835 -0.621038 -4.244478  
H 3.428331 0.111665 -2.836841  
H 3.293020 -4.298672 0.403747  
C 0.540836 -0.131550 1.055951

C 1.936498 0.107780 0.431799  
H -0.187280 -0.213457 0.236491  
H 0.266222 0.735648 1.667083  
C 5.111629 0.699647 3.300975  
C 4.876564 -0.561698 2.751185  
C 4.311661 1.778834 2.918402  
C 3.853170 -0.738456 1.818451  
H 5.495975 -1.407483 3.035679  
C 3.279964 1.601602 1.994237  
H 4.489212 2.764009 3.340342  
C 3.045706 0.338500 1.432623  
H 3.681989 -1.718454 1.384489  
H 2.655289 2.444943 1.717168  
H 2.173359 -0.752748 -0.195472  
H -3.381624 6.696426 -0.409718  
H -3.322934 7.836372 4.027772  
H -3.436640 5.408716 4.347470  
H -8.665270 -0.209033 -2.931554  
H -2.123780 -3.184354 -7.261724  
H -3.803260 3.065740 5.203998  
H 2.162581 3.967900 4.151125  
O 0.713065 4.093246 2.664516  
H 0.551298 5.053854 2.492174  
H -9.329020 -2.898524 -1.578228  
C -6.630683 -3.518454 -1.287611  
H -6.445891 -3.918935 -2.290748  
H -5.669292 -3.459309 -0.765973  
H -7.255637 -4.242423 -0.749728  
C -7.497945 -1.571140 0.063464  
H -7.913302 -0.559022 0.047246  
H -8.174615 -2.201594 0.654358  
H -6.540772 -1.524754 0.593400  
H 1.569897 -6.944506 7.368345  
C 2.179653 -2.752506 5.868104  
H 2.737653 -1.944924 6.346890  
H 2.769928 -3.142869 5.035287  
H 1.230514 -2.359453 5.496060  
S 1.917567 -4.043044 7.139195  
H 5.913910 0.842030 4.019411

**TS2-R-SO-C1-r3**

C 2.587000 -0.513000 -6.132000  
C 1.546225 -1.628125 -6.001961  
O 1.180022 -2.276206 -6.989697  
N 1.065373 -1.845705 -4.748360  
C 0.097300 -2.900200 -4.466800  
C -1.333265 -2.341402 -4.426477  
O -1.588102 -1.321966 -3.759796  
C 0.436818 -3.612552 -3.133229  
C -0.426406 -4.830252 -2.880510  
C -0.073296 -6.080441 -3.410468  
C -1.609753 -4.733454 -2.135232  
C -0.882429 -7.201390 -3.210148  
C -2.423425 -5.850023 -1.935716  
C -2.064367 -7.088048 -2.474861  
N -2.303987 -2.995122 -5.107439  
C -2.200800 -4.248600 -5.909100  
C -3.666842 -4.632822 -6.148644  
C -4.396924 -3.281308 -6.173678  
C -3.684640 -2.478375 -5.080105  
C 3.602400 2.569100 -2.883300  
C 4.780150 1.584939 -3.033676  
O 5.891932 2.006466 -3.379868

|   |           |           |           |   |            |           |           |
|---|-----------|-----------|-----------|---|------------|-----------|-----------|
| C | 2.137370  | 2.085525  | -3.110960 | H | -0.587031  | -8.161632 | -3.623898 |
| C | 1.550549  | 0.887009  | -2.307180 | H | -3.331885  | -5.755784 | -1.347137 |
| O | 1.444731  | 1.245275  | -0.943176 | H | -2.693880  | -7.958503 | -2.313617 |
| O | 1.935237  | -0.304421 | -2.568553 | H | 0.187486   | -3.613769 | -5.287958 |
| N | 4.560622  | 0.289614  | -2.700745 | H | -3.791734  | -5.212129 | -7.066993 |
| C | 5.600100  | -0.724200 | -2.821200 | H | -4.029289  | -5.240604 | -5.312507 |
| C | 5.103233  | -2.146414 | -2.510219 | H | -4.259795  | -2.795221 | -7.146188 |
| C | 5.020597  | -2.511349 | -1.054917 | H | -5.470650  | -3.368840 | -5.989306 |
| C | 3.895171  | -2.868881 | -0.349663 | H | -3.683359  | -1.399806 | -5.252431 |
| C | 6.126886  | -2.635125 | -0.134262 | H | -4.128318  | -2.654799 | -4.091652 |
| C | 5.586371  | -3.065573 | 1.114244  | H | -1.651988  | -5.017865 | -5.365498 |
| C | 7.518521  | -2.449808 | -0.237431 | H | 2.006982   | 1.815360  | -4.161976 |
| N | 4.227567  | -3.191364 | 0.949908  | H | 1.491682   | 2.950015  | -2.930014 |
| C | 6.391562  | -3.299923 | 2.235428  | H | 3.688580   | 2.996408  | -1.875972 |
| C | 8.320899  | -2.683747 | 0.874265  | H | 5.801859   | -2.832591 | -3.008549 |
| C | 7.762035  | -3.102698 | 2.100148  | H | 4.131403   | -2.305203 | -2.991781 |
| C | -3.392900 | -4.279500 | 5.410800  | H | 2.861878   | -2.930775 | -0.662845 |
| C | -2.843107 | -4.421024 | 4.131409  | H | 7.965373   | -2.131988 | -1.175605 |
| C | -3.188645 | -3.078436 | 6.098873  | H | 9.395683   | -2.542062 | 0.800595  |
| C | -2.100270 | -3.393599 | 3.542430  | H | 5.959045   | -3.627083 | 3.176520  |
| C | -2.451191 | -2.044356 | 5.524862  | H | 8.412756   | -3.275954 | 2.952759  |
| C | -1.896431 | -2.190724 | 4.240431  | H | 6.439026   | -0.465155 | -2.164824 |
| O | -1.183949 | -1.151792 | 3.745846  | H | -2.989891  | -5.344957 | 3.577966  |
| C | -0.169900 | -6.724200 | 7.150200  | H | -3.607078  | -2.942276 | 7.092754  |
| C | 0.214414  | -5.434685 | 7.885725  | H | -1.672507  | -3.514703 | 2.550968  |
| C | 0.653777  | -4.331377 | 6.920067  | H | -2.292585  | -1.110177 | 6.054934  |
| C | -9.151000 | -1.516900 | -2.590800 | H | -0.820083  | -1.309697 | 2.828341  |
| C | -8.775993 | -2.990850 | -2.780382 | H | -0.638818  | -5.079910 | 8.476795  |
| C | -7.311718 | -3.338575 | -2.444941 | H | 1.517068   | -4.660748 | 6.331358  |
| C | 2.343700  | -6.641200 | 2.345200  | H | -0.155859  | -4.079204 | 6.228090  |
| C | 2.095126  | -5.424450 | 2.989717  | H | 0.671473   | -7.115072 | 6.567638  |
| C | 1.951727  | -6.769872 | 1.005881  | H | -8.969460  | -3.274391 | -3.823708 |
| C | 1.482181  | -4.358313 | 2.324406  | H | -6.669165  | -2.681402 | -3.051271 |
| C | 1.342429  | -5.721191 | 0.327251  | H | -9.068856  | -1.204786 | -1.545102 |
| C | 1.081624  | -4.464441 | 0.955336  | H | 2.130385   | -7.707047 | 0.480801  |
| O | 0.526512  | -3.485175 | 0.293419  | H | 2.385126   | -5.297965 | 4.031584  |
| C | -3.719900 | 8.329700  | 1.856500  | H | 1.043389   | -5.836907 | -0.709829 |
| C | -2.215806 | 8.586975  | 1.684590  | H | 1.285181   | -3.425031 | 2.847130  |
| C | -1.612553 | 7.500363  | 0.793334  | H | 0.265810   | -2.193228 | 0.927588  |
| O | -1.523326 | 6.329708  | 1.358912  | H | -2.043781  | 9.565571  | 1.227008  |
| O | -1.326979 | 7.740122  | -0.386996 | H | -1.725001  | 8.570482  | 2.664372  |
| C | -3.715300 | 5.693500  | 4.634300  | H | -4.231275  | 8.369757  | 0.888292  |
| C | -2.246172 | 5.584459  | 5.091430  | H | -4.431440  | 4.675982  | 6.411973  |
| O | -1.972556 | 5.284303  | 6.260040  | H | -5.615190  | 4.716966  | 5.084868  |
| C | -4.554000 | 4.607600  | 5.329400  | H | -4.087459  | 6.688930  | 4.906340  |
| N | -1.303478 | 5.824801  | 4.146161  | H | 0.238435   | 2.495598  | 2.633746  |
| C | 0.118500  | 5.532100  | 4.347800  | H | -0.354201  | 2.794057  | 4.277572  |
| C | 0.652998  | 4.490138  | 3.345849  | H | -1.217042  | 3.478164  | 2.889585  |
| C | -0.225131 | 3.238601  | 3.284336  | H | 0.222873   | 5.164102  | 5.370969  |
| C | -3.912400 | 5.457700  | -1.489000 | H | -4.536274  | 5.321834  | -2.375591 |
| C | -2.833932 | 4.425882  | -1.451947 | H | -4.561253  | 5.399389  | -0.607194 |
| C | -2.583982 | 3.322093  | -2.230572 | H | -3.145896  | 2.938211  | -3.069132 |
| N | -1.809745 | 4.466102  | -0.528380 | H | -0.083933  | 3.232942  | -0.205383 |
| C | -0.987655 | 3.429501  | -0.761379 | H | -0.733148  | 1.728635  | -2.349883 |
| N | -1.430777 | 2.708287  | -1.786745 | H | -4.182041  | 9.079569  | 2.507641  |
| O | -0.038478 | 0.984101  | -2.896548 | H | -10.182491 | -1.330743 | -2.908300 |
| O | 0.024512  | -1.284305 | 1.385444  | H | 3.399075   | -0.871513 | -6.768839 |
| H | 2.985326  | -0.191182 | -5.168998 | H | 6.001777   | -0.701338 | -3.843860 |
| H | 2.127001  | 0.344943  | -6.632967 | H | 3.800707   | 3.384497  | -3.583024 |
| H | 1.489289  | -3.909430 | -3.189585 | H | 2.823478   | -7.462125 | 2.869908  |
| H | 0.344690  | -2.911228 | -2.300524 | H | -0.478259  | -7.501236 | 7.857227  |
| H | 0.848322  | -6.176417 | -3.979933 | H | 0.713396   | 6.448624  | 4.249905  |
| H | -1.880653 | -3.779044 | -1.695090 | H | -3.969665  | -5.083810 | 5.856673  |

|                        |           |           |           |   |           |           |           |
|------------------------|-----------|-----------|-----------|---|-----------|-----------|-----------|
| H                      | -1.667721 | 5.209029  | 0.208298  | N | -2.288154 | -3.002557 | -5.109985 |
| H                      | -0.410880 | 0.082459  | -3.002126 | C | -2.182800 | -4.257500 | -5.907800 |
| H                      | -1.001019 | -6.548251 | 6.458939  | C | -3.648266 | -4.644157 | -6.146705 |
| H                      | -1.590115 | 6.052335  | 3.188050  | C | -4.379202 | -3.293219 | -6.178781 |
| H                      | 1.380916  | -1.246898 | -3.973244 | C | -3.668199 | -2.484838 | -5.088140 |
| H                      | 3.592230  | -0.038054 | -2.579258 | C | 3.613100  | 2.561300  | -2.870500 |
| H                      | 3.563657  | -3.553800 | 1.625872  | C | 4.797329  | 1.579632  | -3.001450 |
| C                      | 0.068027  | -0.186743 | 0.489986  | O | 5.920055  | 2.011184  | -3.307125 |
| C                      | 1.500158  | 0.180839  | 0.050611  | C | 2.159750  | 2.073602  | -3.142492 |
| H                      | -0.511658 | -0.390764 | -0.421280 | C | 1.495564  | 0.869056  | -2.380074 |
| H                      | -0.400019 | 0.673674  | 0.983384  | O | 1.446327  | 1.254793  | -0.955962 |
| C                      | 4.291314  | 1.476950  | 3.124371  | O | 1.986481  | -0.330293 | -2.589170 |
| C                      | 3.044241  | 0.974366  | 3.492847  | N | 4.563323  | 0.280180  | -2.705688 |
| C                      | 4.623889  | 1.547173  | 1.769044  | C | 5.609700  | -0.732500 | -2.799800 |
| C                      | 2.130529  | 0.554564  | 2.520190  | C | 5.057540  | -2.173517 | -2.776110 |
| H                      | 2.773749  | 0.903545  | 4.542919  | C | 4.957289  | -2.799608 | -1.414025 |
| C                      | 3.711964  | 1.130259  | 0.801144  | C | 3.820766  | -3.082378 | -0.692352 |
| H                      | 5.596514  | 1.923638  | 1.464154  | C | 6.064679  | -3.262912 | -0.612086 |
| C                      | 2.445659  | 0.637966  | 1.156933  | C | 5.515741  | -3.814309 | 0.583413  |
| H                      | 1.181267  | 0.139124  | 2.831893  | C | 7.461122  | -3.284182 | -0.786305 |
| H                      | 3.987231  | 1.172832  | -0.246285 | N | 4.150283  | -3.686420 | 0.503219  |
| H                      | 1.932496  | -0.695017 | -0.440057 | C | 6.319086  | -4.372057 | 1.585687  |
| H                      | -3.478638 | 6.462759  | -1.513598 | C | 8.261661  | -3.836935 | 0.207662  |
| H                      | -3.901099 | 7.345476  | 2.290199  | C | 7.695432  | -4.374716 | 1.383370  |
| H                      | -3.781999 | 5.604810  | 3.546396  | C | -3.408100 | -4.278300 | 5.409100  |
| H                      | -8.498781 | -0.864585 | -3.183137 | C | -2.841377 | -4.421530 | 4.136620  |
| H                      | -1.676868 | -4.041852 | -6.850076 | C | -3.221887 | -3.070803 | 6.091343  |
| H                      | 1.651098  | 4.200284  | 3.699984  | C | -2.100610 | -3.391586 | 3.548195  |
| O                      | 0.868044  | 5.045350  | 2.048726  | C | -2.487132 | -2.033851 | 5.518607  |
| H                      | 0.052129  | 5.506191  | 1.761005  | C | -1.916841 | -2.182208 | 4.240908  |
| H                      | -4.235319 | 3.608258  | 5.017018  | O | -1.210957 | -1.136874 | 3.749151  |
| H                      | -9.438017 | -3.620065 | -2.167606 | C | -0.191000 | -6.722500 | 7.159800  |
| C                      | -6.998399 | -4.790297 | -2.835486 | C | 0.332794  | -5.448036 | 7.832139  |
| H                      | -7.197048 | -4.970798 | -3.898027 | C | 0.657179  | -4.352119 | 6.813893  |
| H                      | -5.948268 | -5.036523 | -2.643148 | C | -9.142600 | -1.520500 | -2.611300 |
| H                      | -7.614171 | -5.491585 | -2.258416 | C | -8.421857 | -2.853196 | -2.380311 |
| C                      | -6.972566 | -3.093566 | -0.967004 | C | -7.091384 | -2.749711 | -1.608465 |
| H                      | -7.113233 | -2.047655 | -0.678615 | C | 2.336600  | -6.644200 | 2.362100  |
| H                      | -7.606478 | -3.708642 | -0.315655 | C | 2.219645  | -5.380911 | 2.953761  |
| H                      | -5.929789 | -3.353778 | -0.756482 | C | 1.726971  | -6.844641 | 1.115552  |
| H                      | 1.023863  | -5.641543 | 8.596881  | C | 1.527082  | -4.341189 | 2.324712  |
| C                      | 1.574889  | -1.714912 | 6.444642  | C | 1.033090  | -5.824259 | 0.475428  |
| H                      | 0.726121  | -1.558431 | 5.774931  | C | 0.902127  | -4.520495 | 1.049249  |
| H                      | 1.871114  | -0.756209 | 6.875906  | O | 0.256879  | -3.571918 | 0.428587  |
| H                      | 2.417780  | -2.126270 | 5.883805  | C | -3.721100 | 8.328000  | 1.843200  |
| S                      | 1.125241  | -2.808820 | 7.840112  | C | -2.218014 | 8.589183  | 1.665875  |
| H                      | 4.999415  | 1.801703  | 3.881678  | C | -1.629993 | 7.504506  | 0.767557  |
| <b>Int2-R-SO-C1-r3</b> |           |           |           | O | -1.533801 | 6.332000  | 1.336212  |
| C                      | 2.606200  | -0.523100 | -6.119500 | O | -1.369848 | 7.732590  | -0.419504 |
| C                      | 1.542974  | -1.618112 | -5.986286 | C | -3.725300 | 5.694100  | 4.623300  |
| O                      | 1.142074  | -2.237177 | -6.980578 | C | -2.257500 | 5.594262  | 5.086690  |
| N                      | 1.088992  | -1.857280 | -4.727116 | O | -1.986064 | 5.302105  | 6.257167  |
| C                      | 0.111100  | -2.908100 | -4.459300 | C | -4.559300 | 4.609200  | 5.326500  |
| C                      | -1.317600 | -2.345638 | -4.430055 | N | -1.311172 | 5.831841  | 4.143195  |
| O                      | -1.570296 | -1.321910 | -3.770824 | C | 0.109100  | 5.531500  | 4.347900  |
| C                      | 0.433628  | -3.629505 | -3.124613 | C | 0.629894  | 4.464771  | 3.364871  |
| C                      | -0.385538 | -4.887116 | -2.925252 | C | -0.255474 | 3.217647  | 3.335063  |
| C                      | 0.050055  | -6.112462 | -3.451607 | C | -3.904800 | 5.453300  | -1.500400 |
| C                      | -1.607702 | -4.853869 | -2.239250 | C | -2.800168 | 4.450116  | -1.448131 |
| C                      | -0.715995 | -7.271236 | -3.306121 | C | -2.524046 | 3.359727  | -2.231270 |
| C                      | -2.379608 | -6.008172 | -2.096702 | N | -1.787725 | 4.512495  | -0.508071 |
| C                      | -1.937990 | -7.220875 | -2.631474 | C | -0.933867 | 3.509141  | -0.716410 |
|                        |           |           |           | N | -1.362286 | 2.790497  | -1.754388 |

|   |           |           |           |                       |            |           |           |
|---|-----------|-----------|-----------|-----------------------|------------|-----------|-----------|
| O | 0.098172  | 0.926331  | -2.867806 | H                     | -10.042436 | -1.661473 | -3.219551 |
| O | 0.076276  | -1.264732 | 1.420732  | H                     | 3.428897   | -0.913843 | -6.723805 |
| H | 2.983633  | -0.181274 | -5.155310 | H                     | 6.164850   | -0.565002 | -3.731871 |
| H | 2.174237  | 0.325248  | -6.659843 | H                     | 3.832030   | 3.387404  | -3.552145 |
| H | 1.498400  | -3.882959 | -3.148860 | H                     | 2.880869   | -7.443728 | 2.855734  |
| H | 0.282338  | -2.946230 | -2.284952 | H                     | -0.419075  | -7.492815 | 7.903731  |
| H | 1.002215  | -6.158302 | -3.975003 | H                     | 0.710958   | 6.441071  | 4.231429  |
| H | -1.942801 | -3.919962 | -1.799319 | H                     | -3.982786  | -5.085165 | 5.853021  |
| H | -0.356827 | -8.211310 | -3.715725 | H                     | -1.667912  | 5.270286  | 0.246572  |
| H | -3.321604 | -5.962370 | -1.557284 | H                     | -0.230639  | 0.013950  | -2.994194 |
| H | -2.535431 | -8.120507 | -2.513930 | H                     | -1.105880  | -6.519433 | 6.592820  |
| H | 0.206070  | -3.621017 | -5.280784 | H                     | -1.598275  | 6.051495  | 3.185184  |
| H | -3.772496 | -5.228363 | -7.062057 | H                     | 1.424707   | -1.270840 | -3.939728 |
| H | -4.010041 | -5.247896 | -5.307266 | H                     | 3.577481   | -0.040958 | -2.586994 |
| H | -4.240966 | -2.811771 | -7.153464 | H                     | 3.471995   | -3.997841 | 1.191974  |
| H | -5.453209 | -3.380124 | -5.995552 | C                     | 0.103926   | -0.191125 | 0.490682  |
| H | -3.666267 | -1.407202 | -5.266841 | C                     | 1.525372   | 0.200488  | 0.027895  |
| H | -4.114946 | -2.655274 | -4.099882 | H                     | -0.477644  | -0.431512 | -0.410128 |
| H | -1.633694 | -5.024845 | -5.361863 | H                     | -0.376878  | 0.675540  | 0.962390  |
| H | 2.065823  | 1.812565  | -4.201572 | C                     | 4.330009   | 1.525347  | 3.084716  |
| H | 1.510120  | 2.942618  | -2.988595 | C                     | 3.083605   | 1.028658  | 3.463379  |
| H | 3.670335  | 2.973168  | -1.854675 | C                     | 4.656567   | 1.578266  | 1.726814  |
| H | 5.730292  | -2.785205 | -3.391539 | C                     | 2.166345   | 0.596308  | 2.498952  |
| H | 4.084153  | -2.197103 | -3.277074 | H                     | 2.816688   | 0.971499  | 4.515392  |
| H | 2.782807  | -2.904750 | -0.935274 | C                     | 3.739821   | 1.151084  | 0.767938  |
| H | 7.911063  | -2.874787 | -1.687102 | H                     | 5.628158   | 1.951046  | 1.413261  |
| H | 9.340652  | -3.856033 | 0.080428  | C                     | 2.474684   | 0.661461  | 1.132787  |
| H | 5.878500  | -4.791596 | 2.485384  | H                     | 1.218811   | 0.183633  | 2.819792  |
| H | 8.345484  | -4.799848 | 2.143126  | H                     | 4.006036   | 1.184217  | -0.281957 |
| H | 6.338756  | -0.601213 | -1.989402 | H                     | 1.966857   | -0.672457 | -0.464353 |
| H | -2.972388 | -5.350581 | 3.587676  | H                     | -3.492787  | 6.466907  | -1.526594 |
| H | -3.652147 | -2.931769 | 7.079852  | H                     | -3.898531  | 7.342765  | 2.275971  |
| H | -1.659369 | -3.514992 | 2.562245  | H                     | -3.788745  | 5.595571  | 3.536002  |
| H | -2.341907 | -1.095347 | 6.045017  | H                     | -8.495791  | -0.808074 | -3.136622 |
| H | -0.821217 | -1.295036 | 2.842029  | H                     | -1.658383  | -4.052861 | -6.849039 |
| H | -0.414006 | -5.073365 | 8.543171  | H                     | 1.629533   | 4.176253  | 3.714847  |
| H | 1.416536  | -4.700484 | 6.105472  | O                     | 0.835892   | 4.992145  | 2.052355  |
| H | -0.236372 | -4.075286 | 6.245661  | H                     | 0.039127   | 5.491238  | 1.780348  |
| H | 0.546964  | -7.135667 | 6.463538  | H                     | -4.233057  | 3.609099  | 5.024741  |
| H | -8.222052 | -3.320755 | -3.353849 | H                     | -9.089556  | -3.543466 | -1.844249 |
| H | -6.448908 | -2.038865 | -2.150584 | C                     | -6.373429  | -4.107108 | -1.587455 |
| H | -9.452956 | -1.054156 | -1.671048 | H                     | -5.408389  | -4.037822 | -1.073949 |
| H | 1.800837  | -7.817392 | 0.631558  | H                     | -6.975159  | -4.859631 | -1.062450 |
| H | 2.683226  | -5.194080 | 3.921332  | H                     | -6.188662  | -4.477897 | -2.601920 |
| H | 0.571749  | -5.996359 | -0.492045 | C                     | -7.279426  | -2.217899 | -0.179737 |
| H | 1.447052  | -3.367770 | 2.802616  | H                     | -7.719722  | -1.216268 | -0.167053 |
| H | 0.200060  | -2.199508 | 0.981494  | H                     | -7.936800  | -2.879907 | 0.398232  |
| H | -2.048550 | 9.568435  | 1.209308  | H                     | -6.320355  | -2.162170 | 0.345863  |
| H | -1.721268 | 8.568175  | 2.642217  | H                     | 1.231672   | -5.680591 | 8.416584  |
| H | -4.236064 | 8.369609  | 0.877089  | C                     | 1.668741   | -1.791411 | 6.215200  |
| H | -4.440352 | 4.689034  | 6.408598  | H                     | 2.058775   | -0.848473 | 6.604668  |
| H | -5.620393 | 4.709427  | 5.077776  | H                     | 2.429651   | -2.253477 | 5.581394  |
| H | -4.103183 | 6.689775  | 4.886144  | H                     | 0.770132   | -1.590774 | 5.627446  |
| H | 0.196521  | 2.460859  | 2.692161  | S                     | 1.298637   | -2.848941 | 7.661102  |
| H | -0.374466 | 2.791341  | 4.337421  | H                     | 5.041221   | 1.859047  | 3.835416  |
| H | -1.251116 | 3.455531  | 2.948527  |                       |            |           |           |
| H | 0.212182  | 5.181671  | 5.377358  | <b>TS3-R-SO-C1-r3</b> |            |           |           |
| H | -4.516467 | 5.295064  | -2.391030 | C                     | 2.333000   | -0.600000 | -6.312700 |
| H | -4.555370 | 5.379851  | -0.621945 | C                     | 1.129208   | -1.548194 | -6.260217 |
| H | -3.052406 | 2.953086  | -3.078451 | O                     | 0.599585   | -1.986326 | -7.287754 |
| H | -0.031940 | 3.317501  | -0.156331 | N                     | 0.700735   | -1.859425 | -5.010293 |
| H | -0.828199 | 1.972630  | -2.171952 | C                     | -0.454500  | -2.703200 | -4.738800 |
| H | -4.181452 | 9.075828  | 2.497672  | C                     | -1.746404  | -1.870264 | -4.709516 |

|   |           |           |           |   |           |           |           |
|---|-----------|-----------|-----------|---|-----------|-----------|-----------|
| O | -1.785812 | -0.802711 | -4.070397 | C | 1.489604  | 3.990392  | 3.503238  |
| C | -0.222518 | -3.409786 | -3.374421 | C | 0.439934  | 2.907624  | 3.245039  |
| C | -1.367696 | -4.276724 | -2.896439 | C | -3.042200 | 5.905900  | -0.999700 |
| C | -1.597039 | -5.543770 | -3.454836 | C | -1.926075 | 4.911818  | -0.848291 |
| C | -2.218526 | -3.835574 | -1.873179 | C | -1.671003 | 3.699511  | -1.447317 |
| C | -2.659963 | -6.338326 | -3.021501 | N | -0.871657 | 5.118115  | 0.025956  |
| C | -3.281201 | -4.629265 | -1.434697 | C | -0.031474 | 4.077949  | -0.047100 |
| C | -3.510193 | -5.880070 | -2.012104 | N | -0.488429 | 3.198126  | -0.931028 |
| N | -2.833779 | -2.331839 | -5.368708 | O | 0.213844  | 1.156201  | -3.466733 |
| C | -2.969300 | -3.566200 | -6.192200 | O | -0.460593 | -1.567852 | 0.805862  |
| C | -4.476288 | -3.639715 | -6.470350 | H | 2.824277  | -0.488778 | -5.346019 |
| C | -4.913864 | -2.167047 | -6.485449 | H | 1.991545  | 0.382435  | -6.654645 |
| C | -4.079587 | -1.541695 | -5.362480 | H | 0.684877  | -4.013477 | -3.482560 |
| C | 3.895700  | 2.022900  | -2.883100 | H | -0.002873 | -2.648031 | -2.622288 |
| C | 4.883295  | 0.886663  | -3.224080 | H | -0.927629 | -5.916392 | -4.226896 |
| O | 5.985538  | 1.154062  | -3.721022 | H | -2.026088 | -2.879799 | -1.394141 |
| C | 2.415200  | 1.966721  | -3.340478 | H | -2.817001 | -7.318200 | -3.463731 |
| C | 1.443347  | 0.833029  | -2.954904 | H | -3.923038 | -4.273500 | -0.633661 |
| O | 1.093664  | 1.234213  | -1.100487 | H | -4.333277 | -6.499419 | -1.667530 |
| O | 1.796258  | -0.380150 | -2.936002 | H | -0.510915 | -3.444560 | -5.538527 |
| N | 4.522904  | -0.368911 | -2.857390 | H | -4.692999 | -4.167655 | -7.402462 |
| C | 5.359000  | -1.531400 | -3.140800 | H | -4.977057 | -4.173464 | -5.655152 |
| C | 4.970296  | -2.768453 | -2.315925 | H | -4.654733 | -1.706612 | -7.445347 |
| C | 5.268307  | -2.672721 | -0.848216 | H | -5.987101 | -2.035113 | -6.326622 |
| C | 4.342754  | -2.656214 | 0.167255  | H | -3.850261 | -0.485094 | -5.516169 |
| C | 6.566989  | -2.586190 | -0.222595 | H | -4.574538 | -1.635257 | -4.387239 |
| C | 6.346676  | -2.508384 | 1.184879  | H | -2.604574 | -4.439940 | -5.650601 |
| C | 7.891887  | -2.578640 | -0.696868 | H | 2.393066  | 1.955080  | -4.438279 |
| N | 4.986590  | -2.570978 | 1.386892  | H | 1.945613  | 2.909245  | -3.045995 |
| C | 7.398722  | -2.406344 | 2.101698  | H | 3.926286  | 2.140679  | -1.793839 |
| C | 8.940695  | -2.481383 | 0.212159  | H | 5.508660  | -3.619356 | -2.756550 |
| C | 8.696342  | -2.391550 | 1.598314  | H | 3.903323  | -2.978665 | -2.458564 |
| C | -3.867200 | -4.313100 | 5.130700  | H | 3.260387  | -2.733429 | 0.117295  |
| C | -3.617949 | -4.370132 | 3.754920  | H | 8.096965  | -2.648853 | -1.761701 |
| C | -3.208598 | -3.338273 | 5.888970  | H | 9.965539  | -2.472814 | -0.148847 |
| C | -2.726478 | -3.485284 | 3.140999  | H | 7.208256  | -2.343589 | 3.169395  |
| C | -2.315139 | -2.450712 | 5.290864  | H | 9.534357  | -2.312307 | 2.285241  |
| C | -2.055615 | -2.518561 | 3.909486  | H | 6.398147  | -1.249792 | -2.949021 |
| O | -1.154792 | -1.643959 | 3.404278  | H | -4.120740 | -5.115140 | 3.143696  |
| C | -1.020400 | -7.351800 | 6.562200  | H | -3.389535 | -3.266202 | 6.958256  |
| C | -0.180509 | -6.303694 | 7.301123  | H | -2.536468 | -3.544876 | 2.073347  |
| C | 0.365779  | -5.237926 | 6.349046  | H | -1.803572 | -1.693730 | 5.877428  |
| C | -9.326100 | -0.076300 | -2.423600 | H | -1.004245 | -1.715769 | 2.420584  |
| C | -9.014454 | -1.569467 | -2.272537 | H | -0.791489 | -5.821181 | 8.073964  |
| C | -7.517626 | -1.933451 | -2.327982 | H | 1.004611  | -5.693730 | 5.584958  |
| C | 1.354300  | -7.272700 | 1.687100  | H | -0.455340 | -4.719737 | 5.843845  |
| C | 0.636885  | -6.254766 | 2.330400  | H | -0.425798 | -7.875236 | 5.805463  |
| C | 1.989956  | -6.954066 | 0.478252  | H | -9.535387 | -2.121845 | -3.066280 |
| C | 0.556306  | -4.967145 | 1.798978  | H | -7.113939 | -1.530872 | -3.270316 |
| C | 1.913509  | -5.674507 | -0.067970 | H | -8.906141 | 0.515071  | -1.603981 |
| C | 1.189573  | -4.617726 | 0.566936  | H | 2.557678  | -7.719291 | -0.049710 |
| O | 1.138009  | -3.419901 | 0.043745  | H | 0.124618  | -6.466860 | 3.267736  |
| C | -2.322300 | 8.440000  | 2.541200  | H | 2.413921  | -5.449455 | -1.007207 |
| C | -0.863712 | 8.851733  | 2.758548  | H | 0.004493  | -4.195782 | 2.329571  |
| C | 0.132086  | 7.971211  | 1.990357  | H | 0.178564  | -2.305722 | 0.470752  |
| O | -0.128415 | 6.693451  | 2.050068  | H | -0.697153 | 9.896060  | 2.477822  |
| O | 1.091584  | 8.477098  | 1.401899  | H | -0.615780 | 8.762957  | 3.825803  |
| C | -2.657300 | 5.621900  | 5.112600  | H | -2.617185 | 8.578742  | 1.494423  |
| C | -1.250805 | 5.090923  | 5.452864  | H | -3.585752 | 4.735147  | 6.862762  |
| O | -1.053067 | 4.422786  | 6.474170  | H | -4.739051 | 5.213206  | 5.596934  |
| C | -3.750500 | 4.782700  | 5.784400  | H | -2.716979 | 6.664593  | 5.450510  |
| N | -0.268026 | 5.422555  | 4.577129  | H | 0.788096  | 2.220781  | 2.472999  |
| C | 1.096600  | 4.899900  | 4.672900  | H | 0.251688  | 2.331507  | 4.157689  |

H -0.509031 3.348758 2.925854  
H 1.151199 4.343890 5.611626  
H -3.777110 5.537544 -1.718433  
H -3.551475 6.076831 -0.045619  
H -2.233521 3.166012 -2.197003  
H 0.863338 3.984000 0.554117  
H 0.095160 2.229958 -1.077094  
H -3.002444 9.039170 3.156546  
H -10.407086 0.099446 -2.433653  
H 3.043047 -0.978613 -7.051825  
H 5.300113 -1.788891 -4.209675  
H 4.335124 2.924363 -3.315038  
H 1.413106 -8.272080 2.108148  
H -1.412035 -8.102198 7.256895  
H 1.809498 5.732164 4.727917  
H -4.563211 -5.003528 5.596597  
H -0.713818 5.888220 0.716685  
H -0.343870 0.348212 -3.520262  
H -1.872137 -6.885842 6.054914  
H -0.490112 5.947454 3.726527  
H 1.126412 -1.376050 -4.209613  
H 3.522487 -0.521915 -2.685021  
H 4.514783 -2.415946 2.264177  
C -0.310689 -0.315571 0.136172  
C 1.136786 0.116766 -0.241541  
H -0.872149 -0.323529 -0.810170  
H -0.765510 0.448631 0.779796  
C 3.906505 0.811478 3.059954  
C 3.019252 -0.267263 3.106088  
C 3.871130 1.668993 1.960147  
C 2.122381 -0.498263 2.060265  
H 3.022273 -0.935547 3.963934  
C 2.958942 1.448164 0.925876  
H 4.545864 2.519271 1.908065  
C 2.073125 0.362440 0.949343  
H 1.453035 -1.346916 2.107806  
H 2.910218 2.127304 0.083797  
H 1.559880 -0.725681 -0.813699  
H -2.667836 6.871102 -1.356680  
H -2.469538 7.389019 2.788486  
H -2.790449 5.637407 4.026410  
H -8.917446 0.319619 -3.360781  
H -2.390435 -3.457491 -7.117274  
H -3.747731 3.757135 5.403079  
H 2.426664 3.497050 3.788617  
O 1.805970 4.742858 2.328143  
H 1.171731 5.491709 2.227954  
H -9.431909 -1.937197 -1.323852  
C -7.335302 -3.458300 -2.353751  
H -7.864067 -3.910034 -3.200828  
H -6.277847 -3.733434 -2.430361  
H -7.728858 -3.913307 -1.436020  
C -6.718090 -1.315012 -1.171539  
H -6.772145 -0.222132 -1.169942  
H -7.096264 -1.669820 -0.204459  
H -5.660325 -1.591708 -1.235075  
H 0.652066 -6.794005 7.820679  
S 1.352075 -3.983996 7.265237  
C 1.821789 -2.884330 5.881304  
H 2.394264 -2.059137 6.310085  
H 2.445431 -3.415426 5.157843  
H 0.938060 -2.484121 5.378688  
H 4.609703 0.981740 3.870655

**Prod-R-SO-C1-r3**

C 2.335700 -0.383000 -6.199300  
C 1.346082 -1.542017 -6.075941  
O 0.865679 -2.093700 -7.068722  
N 1.004796 -1.923879 -4.805443  
C -0.120500 -2.832800 -4.575900  
C -1.434953 -2.076645 -4.862651  
O -1.554187 -0.888009 -4.505890  
C -0.071181 -3.344845 -3.116118  
C -1.052271 -4.459271 -2.821121  
C -0.733315 -5.787863 -3.141833  
C -2.295161 -4.194512 -2.231554  
C -1.635792 -6.822780 -2.890344  
C -3.199052 -5.227923 -1.974244  
C -2.874260 -6.544586 -2.306714  
N -2.444005 -2.724674 -5.479020  
C -2.459100 -4.111600 -6.017100  
C -3.935937 -4.331897 -6.366005  
C -4.422415 -2.930396 -6.766043  
C -3.701495 -2.009197 -5.774885  
C 3.444500 2.552900 -2.847500  
C 4.329426 1.430937 -3.404987  
O 4.701923 1.464525 -4.583663  
C 2.079660 2.602646 -3.564567  
C 1.265406 1.320627 -3.490132  
O 1.113066 1.511309 0.049402  
O 1.623866 0.301480 -2.913463  
N 4.675284 0.430882 -2.547770  
C 5.430400 -0.745500 -2.978000  
C 4.614045 -2.057261 -3.104919  
C 4.612387 -2.929071 -1.881870  
C 3.551826 -3.235695 -1.060645  
C 5.745086 -3.655686 -1.357109  
C 5.289952 -4.374379 -0.213126  
C 7.092129 -3.785364 -1.744435  
N 3.951524 -4.100548 -0.062483  
C 6.137828 -5.196766 0.539065  
C 7.937240 -4.600083 -0.998946  
C 7.464406 -5.297447 0.133434  
C -3.366400 -4.628000 5.318000  
C -2.768315 -4.535468 4.056994  
C -3.049041 -3.669436 6.286073  
C -1.863667 -3.515014 3.756768  
C -2.146929 -2.644799 6.004055  
C -1.541241 -2.559098 4.737378  
O -0.662763 -1.552484 4.527139  
C -0.110200 -7.154700 6.868100  
C 0.788273 -6.127861 7.567413  
C 1.114339 -4.940956 6.658001  
C -9.313600 -1.505900 -2.408500  
C -8.939036 -2.940377 -2.021563  
C -7.652598 -3.475957 -2.679916  
C 2.282000 -6.871100 2.009100  
C 2.410989 -5.660712 2.698145  
C 1.405228 -6.923815 0.916960  
C 1.694649 -4.525931 2.309133  
C 0.682838 -5.805348 0.517027  
C 0.799624 -4.553387 1.193778  
O 0.123925 -3.507815 0.796263  
C -3.733600 8.123800 2.320100  
C -2.332501 8.714327 2.506839  
C -1.248416 7.944848 1.735027

|   |           |           |           |   |            |           |           |
|---|-----------|-----------|-----------|---|------------|-----------|-----------|
| O | -1.317742 | 6.651985  | 1.862408  | H | -2.300359  | 9.765071  | 2.202530  |
| O | -0.400312 | 8.558022  | 1.076419  | H | -2.062382  | 8.677768  | 3.571701  |
| C | -3.669400 | 5.369900  | 4.980700  | H | -4.054252  | 8.198926  | 1.274474  |
| C | -2.201575 | 5.071864  | 5.347209  | H | -4.478499  | 4.711892  | 6.886833  |
| O | -1.913807 | 4.486486  | 6.397762  | H | -5.680935  | 4.804980  | 5.581548  |
| C | -4.646300 | 4.540500  | 5.821300  | H | -3.847628  | 6.441802  | 5.134268  |
| N | -1.271996 | 5.509314  | 4.459165  | H | 0.307249   | 2.601348  | 2.290902  |
| C | 0.155200  | 5.210500  | 4.590500  | H | -0.222619  | 2.509741  | 3.988545  |
| C | 0.725483  | 4.385162  | 3.424429  | H | -1.145250  | 3.463023  | 2.814269  |
| C | -0.136477 | 3.163044  | 3.112628  | H | 0.272440   | 4.661568  | 5.527750  |
| C | -4.021500 | 5.399600  | -1.140100 | H | -4.757978  | 4.912393  | -1.784276 |
| C | -2.799836 | 4.540889  | -1.014429 | H | -4.492280  | 5.579980  | -0.166623 |
| C | -2.441393 | 3.335553  | -1.580575 | H | -3.015452  | 2.736319  | -2.275123 |
| N | -1.725671 | 4.888773  | -0.220440 | H | 0.131731   | 3.939390  | 0.221078  |
| C | -0.796128 | 3.907702  | -0.330326 | H | 0.264709   | 1.500919  | -0.432147 |
| N | -1.186993 | 2.940571  | -1.147456 | H | -4.475118  | 8.651081  | 2.930721  |
| O | 0.124777  | 1.397992  | -4.181502 | H | -10.271064 | -1.217107 | -1.962215 |
| O | 0.493926  | -1.462609 | 2.169133  | H | 2.887939   | -0.501264 | -7.132875 |
| H | 3.034719  | -0.305619 | -5.367497 | H | 5.845012   | -0.475407 | -3.950772 |
| H | 1.766033  | 0.550068  | -6.258991 | H | 3.962941   | 3.499502  | -3.021904 |
| H | 0.949861  | -3.697238 | -2.937715 | H | 2.844845   | -7.748048 | 2.314953  |
| H | -0.245155 | -2.500072 | -2.441536 | H | -0.337926  | -7.994280 | 7.533137  |
| H | 0.233890  | -6.012183 | -3.585003 | H | 0.727587   | 6.143654  | 4.667823  |
| H | -2.550074 | -3.174251 | -1.958539 | H | -4.070323  | -5.424780 | 5.538661  |
| H | -1.368204 | -7.845160 | -3.141594 | H | -1.645755  | 5.676789  | 0.445293  |
| H | -4.152047 | -5.004310 | -1.504515 | H | -0.365541  | 0.536190  | -4.147543 |
| H | -3.574970 | -7.348757 | -2.102076 | H | -1.058371  | -6.702210 | 6.558284  |
| H | -0.009379 | -3.669023 | -5.268438 | H | -1.560770  | 5.951232  | 3.580239  |
| H | -4.062160 | -5.078000 | -7.154501 | H | 1.253525   | -1.301128 | -4.038111 |
| H | -4.475729 | -4.680640 | -5.478915 | H | 4.222585   | 0.404741  | -1.644644 |
| H | -4.107029 | -2.700212 | -7.789768 | H | 3.347495   | -4.441655 | 0.678724  |
| H | -5.508540 | -2.820893 | -6.715665 | C | 0.244619   | -0.250219 | 1.489355  |
| H | -3.479608 | -1.017003 | -6.173868 | C | 1.425551   | 0.240894  | 0.609354  |
| H | -4.276269 | -1.874648 | -4.850484 | H | -0.642422  | -0.330671 | 0.839529  |
| H | -2.090716 | -4.824080 | -5.279312 | H | 0.033436   | 0.520529  | 2.236014  |
| H | 2.220619  | 2.828744  | -4.627127 | C | 5.127768   | 0.603164  | 2.842716  |
| H | 1.462907  | 3.409659  | -3.155166 | C | 4.403745   | 1.745249  | 2.497519  |
| H | 3.283181  | 2.440006  | -1.771764 | C | 4.653412   | -0.651843 | 2.453137  |
| H | 5.048938  | -2.624336 | -3.939464 | C | 3.213132   | 1.636066  | 1.773883  |
| H | 3.589346  | -1.816081 | -3.400155 | H | 4.765517   | 2.728133  | 2.787797  |
| H | 2.522593  | -2.907718 | -1.102194 | C | 3.465449   | -0.760480 | 1.729211  |
| H | 7.469318  | -3.258423 | -2.617009 | H | 5.211572   | -1.549390 | 2.705353  |
| H | 8.978523  | -4.704650 | -1.290928 | C | 2.725374   | 0.380347  | 1.384513  |
| H | 5.765950  | -5.739536 | 1.402966  | H | 2.660545   | 2.527408  | 1.501780  |
| H | 8.147832  | -5.926966 | 0.696362  | H | 3.106236   | -1.738465 | 1.431863  |
| H | 6.267336  | -0.897952 | -2.288292 | H | 1.578994   | -0.499261 | -0.191357 |
| H | -3.003790 | -5.269775 | 3.290711  | H | -3.788704  | 6.378376  | -1.576289 |
| H | -3.506128 | -3.718558 | 7.271179  | H | -3.748962  | 7.068646  | 2.594087  |
| H | -1.403694 | -3.455548 | 2.773686  | H | -3.818064  | 5.183334  | 3.911531  |
| H | -1.895373 | -1.898379 | 6.751579  | H | -9.410324  | -1.402649 | -3.495826 |
| H | -0.258836 | -1.583823 | 3.606536  | H | -1.823520  | -4.165855 | -6.909712 |
| H | 0.293182  | -5.764021 | 8.476353  | H | 1.716047   | 4.038159  | 3.749530  |
| H | 1.638739  | -5.279200 | 5.757915  | H | -4.514799  | 3.470825  | 5.634429  |
| H | 0.195992  | -4.434943 | 6.344339  | O | 0.975240   | 5.177015  | 2.264424  |
| H | 0.373436  | -7.558183 | 5.971687  | H | 0.177984   | 5.722285  | 2.060756  |
| H | -9.769209 | -3.608387 | -2.288144 | H | -8.832908  | -3.009830 | -0.929333 |
| H | -7.774386 | -3.380100 | -3.770082 | C | -7.463517  | -4.965750 | -2.358520 |
| H | -8.565271 | -0.781661 | -2.072460 | H | -6.574521  | -5.371013 | -2.854017 |
| H | 1.287299  | -7.855603 | 0.366411  | H | -7.339682  | -5.118785 | -1.279130 |
| H | 3.086383  | -5.592984 | 3.549331  | H | -8.327564  | -5.557852 | -2.680687 |
| H | 0.008912  | -5.858965 | -0.332944 | C | -6.407954  | -2.673504 | -2.272521 |
| H | 1.806803  | -3.594589 | 2.856768  | H | -6.482322  | -1.620624 | -2.560870 |
| H | 0.352652  | -2.306070 | 1.554094  | H | -6.258556  | -2.711086 | -1.186096 |



H -5.507168 -3.081172 -2.744000  
H 1.719889 -6.609070 7.890216  
C 2.413390 -2.480466 6.209714  
H 1.453624 -2.112673 5.838721  
H 2.972551 -1.650335 6.646727  
H 2.992119 -2.899915 5.382914  
S 2.176747 -3.720289 7.535320  
H 6.054626 0.689315 3.403078

**TS1-R-SO-C2-r3**

C 2.461196 -0.022610 -6.204697  
C 1.499138 -1.203930 -6.105292  
O 1.210835 -1.881418 -7.097507  
N 0.973325 -1.448582 -4.870051  
C -0.010715 -2.507475 -4.660303  
C -1.431218 -1.907085 -4.618706  
O -1.654151 -0.900047 -3.927542  
C 0.287488 -3.255981 -3.336171  
C -0.567163 -4.488064 -3.129738  
C -0.152349 -5.732708 -3.627215  
C -1.796368 -4.414607 -2.458709  
C -0.944257 -6.871409 -3.465814  
C -2.593049 -5.550118 -2.298139  
C -2.170341 -6.782554 -2.802049  
N -2.421678 -2.503134 -5.317589  
C -2.354303 -3.728517 -6.142907  
C -3.830758 -4.072061 -6.383960  
C -4.520523 -2.698856 -6.390980  
C -3.779805 -1.928314 -5.291857  
C 3.581524 2.802873 -2.762933  
C 4.747092 1.821752 -2.954757  
O 5.887464 2.254795 -3.158029  
C 2.134464 2.278518 -2.889943  
C 1.727657 1.166468 -1.899153  
O 1.502461 1.519221 -0.697688  
O 1.669011 -0.025558 -2.325330  
N 4.488040 0.490839 -2.854854  
C 5.549303 -0.501123 -2.992286  
C 5.011876 -1.903724 -3.354898  
C 4.808269 -2.824720 -2.185341  
C 3.682689 -2.962687 -1.407717  
C 5.788860 -3.731189 -1.639984  
C 5.181519 -4.391555 -0.532979  
C 7.114542 -4.059631 -1.979745  
N 3.901814 -3.900443 -0.416834  
C 5.856675 -5.358287 0.222625  
C 7.789199 -5.016013 -1.229900  
C 7.165389 -5.659125 -0.138903  
C -3.280117 -4.587616 5.169814  
C -2.695175 -4.534151 3.901323  
C -3.090491 -3.511338 6.043795  
C -1.929267 -3.435389 3.502917  
C -2.327702 -2.408714 5.661436  
C -1.735257 -2.363090 4.387700  
O -1.006013 -1.258831 4.081731  
C -0.040099 -7.178701 6.645599  
C 0.476544 -6.148936 7.656659  
C 0.779711 -4.802196 6.996219  
C -9.199399 -1.196800 -2.464300  
C -8.489333 -2.531119 -2.210862  
C -7.156567 -2.424486 -1.443392  
C 2.360408 -6.759428 1.800612  
C 2.407052 -5.545103 2.489653

C 1.500924 -6.884052 0.703385  
C 1.618242 -4.462158 2.088569  
C 0.708172 -5.816122 0.291519  
C 0.764179 -4.588435 0.976110  
O -0.012429 -3.574888 0.532458  
C -3.573000 8.252100 2.564600  
C -2.343781 8.404727 1.667311  
C -1.392126 7.203690 1.754680  
O -1.934533 6.045384 1.820010  
O -0.158809 7.429849 1.763632  
C -3.527700 5.417598 5.139399  
C -2.046599 5.287121 5.529109  
O -1.729551 5.068658 6.706791  
C -4.286300 4.114901 5.450701  
N -1.142866 5.402580 4.524145  
C 0.296700 5.248901 4.749201  
C 1.080568 4.580759 3.597236  
C 0.336166 3.401183 2.961255  
C -3.870998 5.637098 -0.978002  
C -2.746947 4.726878 -1.333074  
C -2.489706 3.956434 -2.442197  
N -1.678202 4.511610 -0.488837  
C -0.836787 3.640483 -1.102368  
N -1.296264 3.279512 -2.292849  
O -0.669749 1.750541 -4.682435  
O 0.469773 -1.330556 1.747946  
H 3.070834 0.100943 -5.307034  
H 1.874054 0.892406 -6.338560  
H 1.344817 -3.537237 -3.357206  
H 0.152756 -2.554194 -2.507394  
H 0.803572 -5.809103 -4.139758  
H -2.124565 -3.461944 -2.053166  
H -0.601962 -7.826616 -3.854073  
H -3.540373 -5.472639 -1.772224  
H -2.787337 -7.667045 -2.672246  
H 0.094690 -3.189506 -5.504813  
H -3.974498 -4.637517 -7.308110  
H -4.207258 -4.678378 -5.552749  
H -4.373138 -2.207125 -7.359048  
H -5.595590 -2.755786 -6.203002  
H -3.731881 -0.850249 -5.460971  
H -4.232267 -2.087866 -4.304826  
H -1.821867 -4.525992 -5.622549  
H 1.941458 1.916089 -3.900697  
H 1.463781 3.125683 -2.725721  
H 3.722007 3.246361 -1.768786  
H 5.728101 -2.368602 -4.041834  
H 4.080999 -1.796540 -3.922997  
H 2.736764 -2.444314 -1.483484  
H 7.606318 -3.571558 -2.817176  
H 8.813247 -5.274792 -1.484339  
H 5.369869 -5.855289 1.056201  
H 7.717265 -6.403549 0.428119  
H 6.144082 -0.558528 -2.071270  
H -2.834583 -5.356232 3.204308  
H -3.540707 -3.526979 7.032741  
H -1.488990 -3.408933 2.511081  
H -2.182319 -1.568381 6.333379  
H -0.552679 -1.319111 3.206184  
H -0.268723 -6.004854 8.448611  
H 1.556795 -4.915231 6.232215  
H -0.116795 -4.400312 6.513324  
H 0.695133 -7.361478 5.854158

H -8.295224 -3.017803 -3.176135  
H -6.508371 -1.730782 -2.000471  
H -9.504205 -0.711449 -1.531904  
H 1.451453 -7.822396 0.157526  
H 3.063003 -5.430803 3.348508  
H 0.047207 -5.904268 -0.563738  
H 1.651660 -3.521078 2.628482  
H 0.193190 -2.711456 1.016787  
H -2.661782 8.501033 0.619632  
H -1.781165 9.311431 1.910316  
H -4.128659 7.349886 2.300852  
H -4.152451 3.841338 6.500703  
H -5.356920 4.229129 5.254423  
H -3.945229 6.240645 5.730380  
H 0.984039 2.924460 2.220878  
H 0.056529 2.651404 3.709836  
H -0.572685 3.742084 2.458423  
H 0.400807 4.652695 5.660274  
H -4.649109 5.588397 -1.744530  
H -4.320672 5.368166 -0.016619  
H -3.093386 3.849035 -3.333458  
H 0.079148 3.276243 -0.657243  
H -0.768718 2.259837 -3.849202  
H -4.244414 9.113142 2.469085  
H -10.101394 -1.341141 -3.068544  
H 3.100268 -0.164390 -7.076795  
H 6.226223 -0.140180 -3.773120  
H 3.744929 3.609769 -3.482851  
H 2.976788 -7.595319 2.116324  
H -0.252150 -8.135521 7.133604  
H 0.763522 6.224017 4.944412  
H -3.876913 -5.444034 5.467782  
H -1.573969 4.973893 0.429532  
H -0.906441 0.846172 -4.416747  
H -0.962597 -6.831359 6.168154  
H -1.473064 5.581480 3.571231  
H 1.178046 -0.822574 -4.085933  
H 3.536599 0.161189 -2.699331  
H 3.226988 -4.177344 0.283706  
C 0.622638 0.014908 0.534357  
C 1.656547 -0.697950 1.282587  
H 0.235077 -0.429720 -0.367844  
H 0.088556 0.816823 1.020022  
C 4.174147 1.377323 4.104353  
C 3.077939 0.646628 4.563620  
C 4.440683 1.434344 2.732721  
C 2.247874 -0.024459 3.660089  
H 2.862754 0.599685 5.627474  
C 3.618034 0.761121 1.831188  
H 5.289676 2.004040 2.365903  
C 2.511462 0.030390 2.288750  
H 1.392000 -0.584544 4.019018  
H 3.818647 0.814161 0.765237  
H 2.272009 -1.358425 0.661289  
H -3.544203 6.680231 -0.897574  
H -3.284221 8.171493 3.617560  
H -3.628906 5.677401 4.082443  
H -8.547620 -0.499142 -3.002952  
H -1.832273 -3.518979 -7.085161  
H 1.992945 4.185800 4.066101  
O 1.546536 5.501041 2.624734  
H 0.812560 6.073925 2.290316  
H -3.915586 3.289618 4.834203

H -9.161520 -3.206157 -1.661053  
C -6.451675 -3.788117 -1.395988  
H -6.268939 -4.179476 -2.403050  
H -5.486916 -3.717611 -0.881841  
H -7.061175 -4.524852 -0.857660  
C -7.337181 -1.862721 -0.025233  
H -7.767600 -0.856868 -0.031794  
H -7.999815 -2.506824 0.566886  
H -6.376656 -1.805227 0.497600  
H 1.382183 -6.529529 8.144895  
S 1.358175 -3.579324 8.244120  
C 1.599500 -2.121305 7.167316  
H 0.671340 -1.858880 6.654487  
H 1.899036 -1.292312 7.811903  
H 2.386749 -2.302572 6.431521  
H 4.816785 1.899774 4.807209

**Int1-R-SO-C2-r3**

C 2.367500 -0.003101 -6.236300  
C 1.408968 -1.189428 -6.155960  
O 1.169760 -1.898247 -7.137082  
N 0.836355 -1.405730 -4.933621  
C -0.172097 -2.439101 -4.724505  
C -1.569466 -1.792549 -4.645067  
O -1.746335 -0.796040 -3.923736  
C 0.118462 -3.250539 -3.435559  
C -0.778841 -4.460836 -3.282079  
C -0.419123 -5.690239 -3.854214  
C -1.996036 -4.376933 -2.591006  
C -1.254314 -6.804007 -3.746565  
C -2.835785 -5.487261 -2.484478  
C -2.468618 -6.704314 -3.063350  
N -2.587905 -2.332897 -5.346911  
C -2.575498 -3.537397 -6.207395  
C -4.066460 -3.834982 -6.415066  
C -4.717325 -2.443539 -6.374417  
C -3.927362 -1.717560 -5.278887  
C 3.629497 2.689471 -2.737590  
C 4.735118 1.659623 -2.995735  
O 5.874916 2.051632 -3.260160  
C 2.141557 2.265148 -2.756770  
C 1.677584 1.106032 -1.882733  
O 1.409396 1.426753 -0.613205  
O 1.527287 -0.034167 -2.314614  
N 4.444877 0.337752 -2.865398  
C 5.475693 -0.674481 -3.078101  
C 4.905088 -2.102434 -3.187207  
C 4.785620 -2.844773 -1.887376  
C 3.638144 -3.183404 -1.208153  
C 5.880325 -3.387623 -1.119029  
C 5.312578 -4.039300 0.014459  
C 7.278592 -3.403735 -1.279623  
C 3.948035 -3.897444 -0.070542  
N 6.099672 -4.688636 0.973820  
C 8.062502 -4.047654 -0.328913  
C 7.477845 -4.682504 0.788093  
C -3.393404 -4.660988 5.090503  
C -2.843163 -4.608631 3.804351  
C -3.046916 -3.660955 6.006122  
C -1.962929 -3.588962 3.427366  
C -2.170968 -2.636759 5.647333  
C -1.619882 -2.592264 4.355055  
O -0.769609 -1.567506 4.080351

|   |           |           |           |   |            |           |           |
|---|-----------|-----------|-----------|---|------------|-----------|-----------|
| C | -0.229888 | -7.402492 | 6.456069  | H | -3.461407  | -3.674692 | 7.010792  |
| C | 0.633878  | -6.378312 | 7.201153  | H | -1.539697  | -3.564017 | 2.425402  |
| C | 0.963693  | -5.167397 | 6.325723  | H | -1.901308  | -1.858640 | 6.354882  |
| C | -9.280900 | -0.863900 | -2.375200 | H | -0.399677  | -1.584196 | 3.165681  |
| C | -8.533655 | -2.183899 | -2.155930 | H | 0.111147   | -6.042656 | 8.105394  |
| C | -7.197205 | -2.058304 | -1.397736 | H | 1.504268   | -5.481222 | 5.426413  |
| C | 2.124799  | -6.940612 | 1.592521  | H | 0.046854   | -4.660236 | 6.008952  |
| C | 2.211435  | -5.770551 | 2.353841  | H | 0.283431   | -7.778252 | 5.564198  |
| C | 1.314688  | -6.930560 | 0.449470  | H | -8.335745  | -2.644962 | -3.132949 |
| C | 1.519140  | -4.612970 | 1.986013  | H | -6.573558  | -1.334082 | -1.943961 |
| C | 0.617581  | -5.789443 | 0.069347  | H | -9.589381  | -0.405757 | -1.430315 |
| C | 0.694756  | -4.578481 | 0.819644  | H | 1.230089   | -7.829878 | -0.158100 |
| O | 0.039972  | -3.509982 | 0.441361  | H | 2.834139   | -5.752040 | 3.246762  |
| C | -3.261400 | 8.245300  | 2.822499  | H | -0.004072  | -5.792884 | -0.820547 |
| C | -2.019360 | 8.456306  | 1.956713  | H | 1.593834   | -3.710773 | 2.586885  |
| C | -1.075296 | 7.248709  | 1.987615  | H | 0.342562   | -2.306993 | 1.117568  |
| O | -1.632275 | 6.094027  | 2.003801  | H | -2.319217  | 8.616120  | 0.911266  |
| O | 0.159632  | 7.457714  | 2.000699  | H | -1.459990  | 9.345577  | 2.263244  |
| C | -3.285500 | 5.344099  | 5.322300  | H | -3.807126  | 7.358291  | 2.495528  |
| C | -1.803204 | 5.163943  | 5.687097  | H | -3.913798  | 3.693060  | 6.592040  |
| O | -1.477742 | 4.898063  | 6.852398  | H | -5.123675  | 4.161886  | 5.379463  |
| C | -4.052600 | 4.029100  | 5.561100  | H | -3.686695  | 6.132381  | 5.968713  |
| N | -0.907985 | 5.276146  | 4.673989  | H | 1.123000   | 2.897198  | 2.187629  |
| C | 0.525399  | 5.051200  | 4.877699  | H | 0.161836   | 2.567929  | 3.640815  |
| C | 1.280695  | 4.445829  | 3.674663  | H | -0.396165  | 3.773302  | 2.463395  |
| C | 0.487549  | 3.353665  | 2.950427  | H | 0.610804   | 4.382195  | 5.739054  |
| C | -3.695300 | 5.736501  | -0.782499 | H | -4.480414  | 5.686242  | -1.541547 |
| C | -2.567698 | 4.835806  | -1.148661 | H | -4.135708  | 5.460487  | 0.181406  |
| C | -2.318827 | 4.042337  | -2.244470 | H | -2.937253  | 3.902115  | -3.120685 |
| N | -1.479919 | 4.662481  | -0.322353 | H | 0.291451   | 3.475652  | -0.483845 |
| C | -0.637488 | 3.794365  | -0.930520 | H | -0.650309  | 2.299665  | -3.651424 |
| N | -1.109322 | 3.390539  | -2.102815 | H | -3.935733  | 9.107763  | 2.768716  |
| O | -0.521227 | 1.778346  | -4.472701 | H | -10.184638 | -1.019565 | -2.974049 |
| O | 0.535520  | -1.401483 | 1.637657  | H | 2.871262   | -0.024522 | -7.202330 |
| H | 3.106769  | -0.024035 | -5.430987 | H | 6.009682   | -0.415890 | -3.999302 |
| H | 1.795799  | 0.926152  | -6.139209 | H | 3.764863   | 3.477865  | -3.481753 |
| H | 1.164526  | -3.568718 | -3.487060 | H | 2.670370   | -7.833798 | 1.882040  |
| H | 0.017331  | -2.591770 | -2.567660 | H | -0.462494  | -8.260067 | 7.095897  |
| H | 0.527617  | -5.775281 | -4.382276 | H | 1.030663   | 5.988667  | 5.147854  |
| H | -2.278478 | -3.438341 | -2.123172 | H | -4.077614  | -5.456451 | 5.368586  |
| H | -0.954371 | -7.748792 | -4.191181 | H | -1.368670  | 5.131516  | 0.596701  |
| H | -3.771741 | -5.403422 | -1.939584 | H | -0.898548  | 0.907325  | -4.259243 |
| H | -3.118526 | -7.570081 | -2.974453 | H | -1.176333  | -6.956879 | 6.131223  |
| H | -0.101826 | -3.096442 | -5.591960 | H | -1.235832  | 5.516383  | 3.734358  |
| H | -4.250264 | -4.375739 | -7.346852 | H | 0.991388   | -0.742271 | -4.178821 |
| H | -4.436707 | -4.449160 | -5.586962 | H | 3.492671   | 0.023934  | -2.728949 |
| H | -4.581600 | -1.935032 | -7.335512 | H | 3.266507   | -4.244450 | 0.598529  |
| H | -5.788233 | -2.474808 | -6.158975 | C | 0.648398   | 0.461889  | 0.188254  |
| H | -3.851073 | -0.638247 | -5.429149 | C | 1.473709   | -0.621655 | 0.920973  |
| H | -4.360075 | -1.882867 | -4.284277 | H | -0.073510  | -0.029628 | -0.465098 |
| H | -2.050148 | -4.361695 | -5.723829 | H | 0.128497   | 1.080163  | 0.920286  |
| H | 1.830636  | 1.991532  | -3.765735 | C | 4.564184   | 1.078291  | 3.444581  |
| H | 1.551383  | 3.140707  | -2.478879 | C | 3.337729   | 0.702680  | 3.996766  |
| H | 3.871683  | 3.141089  | -1.767712 | C | 4.789584   | 0.888592  | 2.079532  |
| H | 5.574835  | -2.662296 | -3.852218 | C | 2.340652   | 0.148173  | 3.190375  |
| H | 3.935920  | -2.072134 | -3.699491 | H | 3.154913   | 0.839190  | 5.059158  |
| H | 2.605921  | -2.975673 | -1.451538 | C | 3.793847   | 0.330420  | 1.276372  |
| H | 7.742409  | -2.920982 | -2.135862 | H | 5.743689   | 1.165853  | 1.640111  |
| H | 9.142686  | -4.064016 | -0.444367 | C | 2.554920   | -0.038870 | 1.819238  |
| H | 5.645463  | -5.182225 | 1.827715  | H | 1.394890   | -0.150216 | 3.627737  |
| H | 8.115853  | -5.177092 | 1.515092  | H | 3.987951   | 0.170817  | 0.219193  |
| H | 6.214746  | -0.624948 | -2.270244 | H | 1.963215   | -1.239471 | 0.157393  |
| H | -3.096965 | -5.374237 | 3.075741  | H | -3.373065  | 6.780995  | -0.701378 |

H -2.988732 8.102851 3.873006  
H -3.395006 5.668295 4.284331  
H -8.652903 -0.138414 -2.905380  
H -2.075513 -3.314256 -7.158453  
H 2.174532 3.976166 4.108727  
H -3.691313 3.239989 4.893883  
O 1.789363 5.418110 2.776207  
H 1.079178 6.034413 2.470992  
H -9.183004 -2.887751 -1.614964  
C -6.454003 -3.402307 -1.388296  
H -6.271055 -3.765443 -2.405906  
H -5.486234 -3.316657 -0.882435  
H -7.037090 -4.167899 -0.861142  
C -7.380235 -1.534630 0.034633  
H -7.838729 -0.541363 0.055100  
H -8.019168 -2.210516 0.617231  
H -6.416888 -1.462688 0.550352  
H 1.564912 -6.852337 7.535775  
C 2.280246 -2.712040 5.936053  
H 2.851499 -1.896919 6.384958  
H 2.857440 -3.134461 5.109905  
H 1.332161 -2.320795 5.559896  
S 2.006456 -3.961131 7.244742  
H 5.339123 1.508296 4.072755

**TS2-R-SO-C2-r3**

C 2.607900 -0.182400 -6.113600  
C 1.611578 -1.339700 -6.011796  
O 1.255538 -1.962365 -7.019241  
N 1.156387 -1.627609 -4.761993  
C 0.214300 -2.717300 -4.527700  
C -1.233190 -2.197756 -4.504884  
O -1.527193 -1.190743 -3.835227  
C 0.545223 -3.452736 -3.203443  
C -0.242207 -4.733351 -3.023761  
C 0.229967 -5.940984 -3.558775  
C -1.468696 -4.738021 -2.345153  
C -0.506231 -7.120763 -3.429703  
C -2.211152 -5.913516 -2.219930  
C -1.733850 -7.108696 -2.763384  
N -2.176305 -2.871656 -5.202620  
C -2.027000 -4.110900 -6.015900  
C -3.478180 -4.541738 -6.265651  
C -4.250491 -3.213919 -6.289662  
C -3.571891 -2.394617 -5.186705  
C 3.498000 2.834900 -2.768900  
C 4.715444 1.901654 -2.905429  
O 5.832150 2.384635 -3.137882  
C 2.074758 2.299191 -3.079609  
C 1.462461 1.093598 -2.305574  
O 1.229453 1.465283 -0.968856  
O 1.885012 -0.097777 -2.507891  
N 4.522306 0.574093 -2.709718  
C 5.625300 -0.376600 -2.805600  
C 5.159200 -1.843120 -2.938644  
C 5.044326 -2.598397 -1.644864  
C 3.897389 -3.015133 -1.011043  
C 6.140950 -3.061521 -0.828219  
C 5.573188 -3.748174 0.285342  
C 7.542461 -2.978992 -0.928262  
N 4.206880 -3.706576 0.140944  
C 6.362493 -4.335387 1.281832  
C 8.328946 -3.560871 0.059968

C 7.743732 -4.230930 1.155829  
C -3.223500 -4.541400 5.295800  
C -2.656828 -4.613914 4.016832  
C -3.005359 -3.386027 6.054976  
C -1.886356 -3.568203 3.495263  
C -2.240470 -2.334158 5.551023  
C -1.671711 -2.415130 4.267470  
O -0.938258 -1.347912 3.853070  
C 0.093300 -6.909000 6.964100  
C 0.606007 -5.717615 7.780860  
C 0.932911 -4.514033 6.893996  
C -9.082900 -1.762100 -2.626100  
C -8.371413 -3.097167 -2.380559  
C -7.037720 -2.993815 -1.614244  
C 2.604200 -6.576500 2.168500  
C 2.513869 -5.312531 2.762005  
C 1.857163 -6.819606 1.008006  
C 1.711034 -4.310188 2.212086  
C 1.048285 -5.836152 0.449765  
C 0.941725 -4.533527 1.027233  
O 0.180204 -3.616095 0.493900  
C -4.050400 8.149300 2.134600  
C -2.598320 8.415325 1.742550  
C -1.750439 7.140469 1.702089  
O -2.401017 6.040330 1.631565  
O -0.499817 7.243618 1.741177  
C -3.942400 5.430200 4.829200  
C -2.479781 5.419785 5.304465  
O -2.204903 5.469879 6.510421  
C -4.733200 4.251000 5.420700  
N -1.547986 5.348196 4.323561  
C -0.105000 5.430500 4.544600  
C 0.668568 4.466692 3.629338  
C 0.388097 3.004413 3.957269  
C -4.126600 5.377500 -1.298900  
C -2.978038 4.430669 -1.348513  
C -2.624857 3.464745 -2.256900  
N -1.986923 4.419573 -0.388584  
C -1.083476 3.485756 -0.723978  
N -1.441441 2.882437 -1.854889  
O -0.081232 1.172296 -3.025116  
O 0.414107 -1.292040 1.390777  
H 3.028006 0.104195 -5.148848  
H 2.101390 0.683326 -6.552736  
H 1.616063 -3.678203 -3.225937  
H 0.367726 -2.780747 -2.359094  
H 1.186572 -5.956439 -4.075757  
H -1.830517 -3.818101 -1.897328  
H -0.119747 -8.047116 -3.845531  
H -3.157649 -5.898042 -1.686876  
H -2.308419 -8.024693 -2.659095  
H 0.342297 -3.408408 -5.362814  
H -3.579438 -5.121300 -7.186701  
H -3.824459 -5.163716 -5.433093  
H -4.121115 -2.719086 -7.258788  
H -5.322293 -3.335656 -6.114107  
H -3.600211 -1.315866 -5.355556  
H -4.018976 -2.587378 -4.203004  
H -1.454900 -4.866917 -5.477854  
H 2.022587 2.012101 -4.132553  
H 1.388770 3.141629 -2.955148  
H 3.526819 3.226139 -1.743492  
H 5.888731 -2.355163 -3.579385

H 4.208130 -1.875999 -3.481224  
H 2.865893 -2.873296 -1.297249  
H 8.006808 -2.467129 -1.767199  
H 9.411599 -3.499988 -0.009228  
H 5.907017 -4.856657 2.118488  
H 8.383448 -4.675102 1.913382  
H 6.287859 -0.275824 -1.936355  
H -2.812286 -5.500036 3.406751  
H -3.434505 -3.298034 7.049687  
H -1.449648 -3.640644 2.501332  
H -2.074324 -1.435168 6.136792  
H -0.555537 -1.436880 2.948692  
H -0.148688 -5.427409 8.522212  
H 1.705195 -4.774662 6.161990  
H 0.043377 -4.185162 6.347549  
H 0.837617 -7.236320 6.229965  
H -8.178370 -3.578719 -3.348634  
H -6.391079 -2.295900 -2.168145  
H -9.386964 -1.281906 -1.690810  
H 1.911256 -7.796016 0.529155  
H 3.082262 -5.097724 3.665669  
H 0.476005 -6.038039 -0.450626  
H 1.652651 -3.331970 2.680715  
H 0.341424 -2.258606 1.004452  
H -2.548149 8.872066 0.744059  
H -2.118530 9.128591 2.421804  
H -4.507692 7.426182 1.457304  
H -4.646162 4.246571 6.510639  
H -5.793056 4.319718 5.156920  
H -4.378565 6.373229 5.179714  
H 0.920722 2.352908 3.261427  
H 0.717534 2.761775 4.973125  
H -0.682906 2.794064 3.879502  
H 0.091029 5.200710 5.594659  
H -4.838788 5.148894 -2.095454  
H -4.651223 5.320177 -0.340056  
H -3.133076 3.156946 -3.158677  
H -0.190059 3.281258 -0.156554  
H -0.766315 1.931830 -2.465608  
H -4.640319 9.073398 2.106323  
H -9.985525 -1.903880 -3.230029  
H 3.409674 -0.477290 -6.794421  
H 6.228061 -0.097661 -3.677868  
H 3.695944 3.683542 -3.428333  
H 3.234567 -7.349383 2.598436  
H -0.134959 -7.760680 7.613252  
H 0.234486 6.457104 4.351911  
H -3.821085 -5.359654 5.684893  
H -1.989523 5.015631 0.480792  
H -0.452715 0.269884 -3.131356  
H -0.819114 -6.646924 6.417697  
H -1.857942 5.372675 3.351049  
H 1.434336 -1.034999 -3.965831  
H 3.567375 0.210355 -2.579628  
H 3.523513 -4.059894 0.804033  
C 0.528473 0.516124 -0.138118  
C 1.357058 -0.538942 0.638960  
H -0.205825 -0.026172 -0.740058  
H -0.012864 1.117948 0.597730  
C 4.526771 1.102905 3.115184  
C 3.405301 0.521432 3.706747  
C 4.614489 1.154445 1.721582  
C 2.377780 -0.000699 2.914840

H 3.325880 0.471505 4.789512  
C 3.590320 0.631103 0.932293  
H 5.486768 1.595102 1.246095  
C 2.453638 0.050598 1.517573  
H 1.512733 -0.457934 3.380240  
H 3.680107 0.663000 -0.147458  
H 1.836354 -1.186599 -0.103023  
H -3.798828 6.415476 -1.426052  
H -4.116950 7.742998 3.146328  
H -3.993522 5.427345 3.737387  
H -8.432318 -1.061016 -3.161886  
H -1.506829 -3.876563 -6.952592  
H 1.739931 4.668255 3.810670  
H -4.352683 3.295293 5.045715  
O 0.360177 4.665831 2.253924  
H 0.169154 5.618890 2.071882  
H -9.042432 -3.775477 -1.833454  
H 1.500852 -6.011238 8.343646  
C 1.825536 -1.863526 6.598836  
H 0.909122 -1.666495 6.037971  
H 2.147054 -0.944773 7.093950  
H 2.611206 -2.192341 5.914249  
S 1.538446 -3.104766 7.910781  
C -6.331112 -4.356792 -1.576251  
H -6.151215 -4.742860 -2.585865  
H -5.364787 -4.288292 -1.064983  
H -6.938089 -5.097002 -1.039928  
C -7.216873 -2.440570 -0.192554  
H -7.648618 -1.435203 -0.192468  
H -7.877895 -3.088973 0.396597  
H -6.255718 -2.385322 0.329249  
H 5.326314 1.505931 3.730789

**Int2-R-SO-C2-r3**

C 2.750200 -0.174700 -6.042500  
C 1.747509 -1.330349 -5.952623  
O 1.373891 -1.927737 -6.970544  
N 1.316352 -1.648442 -4.703568  
C 0.371800 -2.740100 -4.483200  
C -1.077739 -2.231597 -4.522290  
O -1.394951 -1.207253 -3.890871  
C 0.659739 -3.433978 -3.126625  
C -0.136574 -4.705116 -2.921554  
C 0.343473 -5.931523 -3.404687  
C -1.375925 -4.685501 -2.266814  
C -0.398100 -7.104734 -3.251520  
C -2.123659 -5.854931 -2.116762  
C -1.638682 -7.068570 -2.610338  
N -1.997154 -2.933209 -5.224165  
C -1.812700 -4.187700 -6.004300  
C -3.251729 -4.637068 -6.289484  
C -4.034779 -3.317360 -6.364867  
C -3.395664 -2.467218 -5.261429  
C 3.516100 2.886800 -2.707200  
C 4.762402 1.983829 -2.797773  
O 5.877185 2.500949 -2.970637  
C 2.128858 2.329109 -3.119333  
C 1.444244 1.101918 -2.415715  
O 1.220207 1.499679 -1.024216  
O 2.011719 -0.081416 -2.532095  
N 4.582485 0.651934 -2.631243  
C 5.702400 -0.284900 -2.672400  
C 5.291364 -1.708177 -3.120132

|   |           |           |           |   |           |           |           |
|---|-----------|-----------|-----------|---|-----------|-----------|-----------|
| C | 5.061128  | -2.682443 | -1.998676 | H | -5.110152 | -3.445493 | -6.217736 |
| C | 3.905996  | -2.864550 | -1.274352 | H | -3.427058 | -1.392893 | -5.456544 |
| C | 6.030271  | -3.593078 | -1.440921 | H | -3.871364 | -2.640401 | -4.287413 |
| C | 5.383110  | -4.298665 | -0.383288 | H | -1.251374 | -4.927091 | -5.432553 |
| C | 7.374916  | -3.892924 | -1.729530 | H | 2.156282  | 2.055891  | -4.178467 |
| N | 4.090824  | -3.834413 | -0.310591 | H | 1.424712  | 3.164973  | -3.045307 |
| C | 6.039223  | -5.278922 | 0.371880  | H | 3.472233  | 3.241442  | -1.668937 |
| C | 8.030253  | -4.862869 | -0.979468 | H | 6.086991  | -2.101350 | -3.763522 |
| C | 7.367882  | -5.549113 | 0.061700  | H | 4.400107  | -1.638352 | -3.752435 |
| C | -3.232100 | -4.544800 | 5.284200  | H | 2.957734  | -2.358113 | -1.379662 |
| C | -2.644533 | -4.598716 | 4.014010  | H | 7.896653  | -3.371393 | -2.528070 |
| C | -3.036839 | -3.396063 | 6.059592  | H | 9.068844  | -5.098867 | -1.195126 |
| C | -1.876897 | -3.540135 | 3.515357  | H | 5.519644  | -5.808073 | 1.165166  |
| C | -2.275029 | -2.331026 | 5.579018  | H | 7.905334  | -6.303293 | 0.630030  |
| C | -1.688671 | -2.393058 | 4.302881  | H | 6.195213  | -0.339547 | -1.692037 |
| O | -0.961382 | -1.313084 | 3.907570  | H | -2.779986 | -5.480775 | 3.393328  |
| C | 0.092900  | -6.836200 | 7.040300  | H | -3.481454 | -3.324044 | 7.048826  |
| C | 0.870879  | -5.663210 | 7.647155  | H | -1.420498 | -3.598029 | 2.528667  |
| C | 1.099617  | -4.543422 | 6.629723  | H | -2.124362 | -1.437572 | 6.177338  |
| C | -8.978600 | -1.941700 | -2.779100 | H | -0.565138 | -1.393462 | 3.009634  |
| C | -8.455914 | -3.329166 | -2.390538 | H | 0.323355  | -5.264573 | 8.510252  |
| C | -7.137867 | -3.329170 | -1.590918 | H | 1.665903  | -4.914631 | 5.768672  |
| C | 2.694800  | -6.497600 | 2.293900  | H | 0.143561  | -4.155052 | 6.263946  |
| C | 2.769516  | -5.173186 | 2.741075  | H | 0.636209  | -7.277237 | 6.197463  |
| C | 1.762072  | -6.804822 | 1.291821  | H | -8.306950 | -3.920473 | -3.303975 |
| C | 1.945362  | -4.178715 | 2.207335  | H | -6.391204 | -2.778371 | -2.183475 |
| C | 0.931066  | -5.829584 | 0.752570  | H | -9.237324 | -1.341147 | -1.901480 |
| C | 0.983558  | -4.467683 | 1.188442  | H | 1.685436  | -7.827298 | 0.925270  |
| O | 0.193358  | -3.564199 | 0.679338  | H | 3.487254  | -4.904879 | 3.514611  |
| C | -4.227500 | 8.101200  | 1.995200  | H | 0.213566  | -6.081752 | -0.023326 |
| C | -2.723328 | 8.392360  | 1.885993  | H | 2.010083  | -3.156071 | 2.569247  |
| C | -2.093603 | 7.393990  | 0.917537  | H | 0.370946  | -2.141397 | 1.096193  |
| O | -1.908833 | 6.198659  | 1.410693  | H | -2.557805 | 9.407486  | 1.513794  |
| O | -1.879632 | 7.707769  | -0.260026 | H | -2.254602 | 8.300283  | 2.871535  |
| C | -4.124700 | 5.407600  | 4.715200  | H | -4.715139 | 8.224665  | 1.022143  |
| C | -2.662016 | 5.395970  | 5.194404  | H | -4.793043 | 4.310841  | 6.463313  |
| O | -2.391177 | 5.164860  | 6.378849  | H | -5.956683 | 4.289635  | 5.118366  |
| C | -4.894200 | 4.251900  | 5.377900  | H | -4.569771 | 6.368197  | 5.001782  |
| N | -1.716444 | 5.633847  | 4.251205  | H | 0.280682  | 2.624766  | 2.568956  |
| C | -0.282900 | 5.476600  | 4.508400  | H | -0.409505 | 2.709209  | 4.197518  |
| C | 0.413466  | 4.589512  | 3.458472  | H | -1.295926 | 3.399544  | 2.828644  |
| C | -0.297691 | 3.250529  | 3.251527  | H | -0.188628 | 5.036334  | 5.503719  |
| C | -4.182300 | 5.299600  | -1.414700 | H | -4.824711 | 5.139170  | -2.283113 |
| C | -2.992598 | 4.406504  | -1.480335 | H | -4.775342 | 5.110952  | -0.512889 |
| C | -2.662562 | 3.395361  | -2.343499 | H | -3.196289 | 2.993049  | -3.189299 |
| N | -1.945475 | 4.506978  | -0.583152 | H | -0.079822 | 3.440955  | -0.387382 |
| C | -1.019724 | 3.598755  | -0.891940 | H | -0.871969 | 2.133959  | -2.415226 |
| N | -1.433283 | 2.908181  | -1.955874 | H | -4.715334 | 8.780847  | 2.701856  |
| O | 0.113211  | 1.094080  | -3.065567 | H | -9.878283 | -2.020756 | -3.398658 |
| O | 0.401738  | -1.164841 | 1.436025  | H | 3.594067  | -0.497945 | -6.657682 |
| H | 3.107572  | 0.154319  | -5.067014 | H | 6.442338  | 0.131956  | -3.363941 |
| H | 2.272527  | 0.666429  | -6.554983 | H | 3.737410  | 3.761893  | -3.323914 |
| H | 1.730067  | -3.659865 | -3.106177 | H | 3.338032  | -7.265250 | 2.713851  |
| H | 0.461864  | -2.728986 | -2.314137 | H | -0.072063 | -7.624251 | 7.782456  |
| H | 1.310675  | -5.966424 | -3.900573 | H | 0.216080  | 6.454201  | 4.521420  |
| H | -1.746558 | -3.750052 | -1.859528 | H | -3.827721 | -5.372785 | 5.655510  |
| H | -0.005331 | -8.045214 | -3.627932 | H | -1.883924 | 5.212923  | 0.227210  |
| H | -3.080877 | -5.819898 | -1.603953 | H | -0.184971 | 0.170965  | -3.201708 |
| H | -2.217742 | -7.979464 | -2.487516 | H | -0.885390 | -6.510316 | 6.670553  |
| H | 0.531955  | -3.454128 | -5.293689 | H | -1.995935 | 5.835952  | 3.287820  |
| H | -3.319619 | -5.235946 | -7.201231 | H | 1.596284  | -1.055179 | -3.895379 |
| H | -3.618383 | -5.245708 | -5.455765 | H | 3.611593  | 0.280537  | -2.531155 |
| H | -3.881871 | -2.842579 | -7.340605 | H | 3.403381  | -4.099817 | 0.388177  |

|                       |           |           |           |   |           |           |           |
|-----------------------|-----------|-----------|-----------|---|-----------|-----------|-----------|
| C                     | 0.502014  | 0.559710  | -0.217614 | O | 6.037293  | 2.089748  | -3.070935 |
| C                     | 1.333522  | -0.402970 | 0.674335  | C | 2.322586  | 2.266263  | -3.230070 |
| H                     | -0.153905 | -0.058314 | -0.839779 | C | 1.477924  | 1.067050  | -2.723218 |
| H                     | -0.137711 | 1.144715  | 0.454975  | O | 0.967802  | 1.621574  | -1.106384 |
| C                     | 4.225071  | 1.672286  | 3.161379  | O | 2.004031  | -0.086338 | -2.566559 |
| C                     | 3.059936  | 1.153684  | 3.727786  | N | 4.699301  | 0.354132  | -2.465172 |
| C                     | 4.451715  | 1.507626  | 1.792117  | C | 5.789200  | -0.620400 | -2.539300 |
| C                     | 2.127189  | 0.479488  | 2.933247  | C | 5.320093  | -2.069994 | -2.330621 |
| H                     | 2.874093  | 1.269270  | 4.792499  | C | 5.136334  | -2.498214 | -0.902388 |
| C                     | 3.519856  | 0.836198  | 1.000146  | C | 3.969730  | -2.900050 | -0.294690 |
| H                     | 5.359622  | 1.897552  | 1.339429  | C | 6.173961  | -2.640185 | 0.092357  |
| C                     | 2.340723  | 0.317510  | 1.558814  | C | 5.551385  | -3.127549 | 1.279991  |
| H                     | 1.231254  | 0.067296  | 3.382007  | C | 7.565560  | -2.427272 | 0.099994  |
| H                     | 3.708088  | 0.709352  | -0.060569 | N | 4.211242  | -3.269795 | 1.011453  |
| H                     | 1.889776  | -1.068382 | 0.005750  | C | 6.276024  | -3.391977 | 2.448705  |
| H                     | -3.867887 | 6.347556  | -1.391950 | C | 8.287770  | -2.689907 | 1.259077  |
| H                     | -4.404749 | 7.078096  | 2.331729  | C | 7.648273  | -3.166022 | 2.423392  |
| H                     | -4.172952 | 5.335358  | 3.624959  | C | -3.474400 | -4.403600 | 5.280700  |
| H                     | -8.229068 | -1.384005 | -3.352747 | C | -2.734864 | -4.614074 | 4.109249  |
| H                     | -1.265110 | -3.969188 | -6.929196 | C | -3.606439 | -3.092747 | 5.754482  |
| H                     | 1.423212  | 4.393192  | 3.841881  | C | -2.135757 | -3.553515 | 3.419477  |
| H                     | -4.499884 | 3.283674  | 5.053881  | C | -3.015036 | -2.024759 | 5.079361  |
| O                     | 0.616212  | 5.274345  | 2.222709  | C | -2.271200 | -2.243042 | 3.905315  |
| H                     | -0.246230 | 5.611482  | 1.904592  | O | -1.734183 | -1.148007 | 3.307291  |
| H                     | -9.223080 | -3.860095 | -1.808122 | C | -0.278600 | -6.787900 | 7.149200  |
| C                     | -6.621325 | -4.763188 | -1.403653 | C | 0.148488  | -5.579241 | 7.990022  |
| H                     | -5.664582 | -4.773700 | -0.870240 | C | 0.222058  | -4.300448 | 7.152551  |
| H                     | -7.331912 | -5.361844 | -0.819983 | C | -8.938200 | -1.725500 | -2.952900 |
| H                     | -6.475450 | -5.265323 | -2.366540 | C | -8.428813 | -3.115478 | -2.555675 |
| C                     | -7.272918 | -2.624696 | -0.232714 | C | -7.112563 | -3.123014 | -1.753105 |
| H                     | -7.564390 | -1.575365 | -0.338703 | C | 2.438600  | -6.629100 | 2.458300  |
| H                     | -8.028994 | -3.121167 | 0.388845  | C | 2.163190  | -5.406502 | 3.081293  |
| H                     | -6.325282 | -2.648596 | 0.315574  | C | 2.007775  | -6.809237 | 1.136777  |
| H                     | 1.837804  | -6.016625 | 8.026322  | C | 1.486230  | -4.383557 | 2.409851  |
| C                     | 2.166993  | -2.036560 | 5.945942  | C | 1.332897  | -5.805224 | 0.453720  |
| H                     | 2.675461  | -1.131660 | 6.284626  | C | 1.040307  | -4.541939 | 1.058658  |
| H                     | 2.757616  | -2.497694 | 5.151027  | O | 0.411907  | -3.612245 | 0.399262  |
| H                     | 1.179450  | -1.771574 | 5.561422  | C | -3.915700 | 8.212500  | 1.763100  |
| S                     | 2.034995  | -3.151974 | 7.389378  | C | -2.631391 | 8.950381  | 2.143347  |
| H                     | 4.951816  | 2.192754  | 3.779256  | C | -1.355873 | 8.289514  | 1.600189  |
| <b>TS3-R-SO-C2-r3</b> |           |           |           |   |           |           |           |
| C                     | 2.918600  | -0.457400 | -5.977100 | O | -1.376371 | 6.985610  | 1.608441  |
| C                     | 1.904114  | -1.601066 | -5.888049 | O | -0.404129 | 8.986093  | 1.234893  |
| O                     | 1.564228  | -2.231046 | -6.896639 | C | -3.975400 | 5.563900  | 4.528500  |
| N                     | 1.414606  | -1.869020 | -4.646616 | C | -2.531509 | 5.291542  | 4.992196  |
| C                     | 0.410600  | -2.904300 | -4.430500 | O | -2.304313 | 4.733363  | 6.071766  |
| C                     | -1.007318 | -2.319366 | -4.544176 | C | -4.976500 | 4.641500  | 5.234300  |
| O                     | -1.287201 | -1.243976 | -3.983447 | N | -1.552075 | 5.716467  | 4.153815  |
| C                     | 0.616925  | -3.590950 | -3.056530 | C | -0.130200 | 5.485000  | 4.408200  |
| C                     | -0.207525 | -4.850940 | -2.895889 | C | 0.591925  | 4.732933  | 3.277563  |
| C                     | 0.258395  | -6.075700 | -3.397904 | C | -0.160055 | 3.471007  | 2.850974  |
| C                     | -1.460736 | -4.821970 | -2.269197 | C | -3.901700 | 5.352700  | -1.598400 |
| C                     | -0.508718 | -7.237563 | -3.286733 | C | -2.550282 | 4.743999  | -1.353527 |
| C                     | -2.233106 | -5.979670 | -2.160178 | C | -1.927147 | 3.635924  | -1.878592 |
| C                     | -1.761301 | -7.191462 | -2.670454 | N | -1.643544 | 5.277134  | -0.451010 |
| N                     | -1.940442 | -3.007286 | -5.241889 | C | -0.540244 | 4.514185  | -0.438575 |
| C                     | -1.793200 | -4.294600 | -5.976900 | N | -0.676958 | 3.509898  | -1.297185 |
| C                     | -3.241735 | -4.674017 | -6.310051 | O | 0.269882  | 1.119078  | -3.406421 |
| C                     | -3.944261 | -3.316398 | -6.464712 | O | 0.016428  | -1.211806 | 1.096992  |
| C                     | -3.306098 | -2.462859 | -5.363125 | H | 3.298660  | -0.152478 | -5.001470 |
| C                     | 3.726300  | 2.630200  | -2.675800 | H | 2.438276  | 0.401235  | -6.457221 |
| C                     | 4.913844  | 1.654366  | -2.780298 | H | 1.681464  | -3.836865 | -2.983911 |
|                       |           |           |           | H | 0.391378  | -2.891842 | -2.247526 |
|                       |           |           |           | H | 1.234600  | -6.118984 | -3.875362 |

|   |           |           |           |                        |           |           |           |
|---|-----------|-----------|-----------|------------------------|-----------|-----------|-----------|
| H | -1.821577 | -3.888568 | -1.848521 | H                      | -3.937277 | -5.235274 | 5.802122  |
| H | -0.126287 | -8.176780 | -3.676706 | H                      | -1.747385 | 6.068579  | 0.217964  |
| H | -3.200082 | -5.937088 | -1.666618 | H                      | -0.110868 | 0.215748  | -3.452045 |
| H | -2.359568 | -8.093541 | -2.579124 | H                      | -1.262835 | -6.624624 | 6.697399  |
| H | 0.563254  | -3.640378 | -5.222470 | H                      | -1.786092 | 6.175392  | 3.269759  |
| H | -3.304422 | -5.300625 | -7.203388 | H                      | 1.649894  | -1.243462 | -3.861606 |
| H | -3.677434 | -5.231413 | -5.473695 | H                      | 3.720131  | 0.040274  | -2.373375 |
| H | -3.722241 | -2.887021 | -7.448110 | H                      | 3.503543  | -3.648913 | 1.633584  |
| H | -5.030549 | -3.379083 | -6.362226 | C                      | 0.208962  | 0.632924  | -0.407748 |
| H | -3.263325 | -1.397069 | -5.598247 | C                      | 0.991413  | -0.365534 | 0.488907  |
| H | -3.834994 | -2.569852 | -4.407342 | H                      | -0.371823 | 0.024778  | -1.115249 |
| H | -1.296467 | -5.044280 | -5.361308 | H                      | -0.512680 | 1.155689  | 0.236148  |
| H | 2.411916  | 2.072972  | -4.305857 | C                      | 3.647473  | 1.475750  | 3.391834  |
| H | 1.700878  | 3.162863  | -3.144869 | C                      | 2.465262  | 0.864865  | 3.812875  |
| H | 3.628949  | 2.887663  | -1.612543 | C                      | 3.963987  | 1.486218  | 2.030511  |
| H | 6.077729  | -2.713305 | -2.798869 | C                      | 1.603000  | 0.276312  | 2.883101  |
| H | 4.394846  | -2.236700 | -2.894763 | H                      | 2.211752  | 0.841634  | 4.869749  |
| H | 2.964728  | -2.961584 | -0.687700 | C                      | 3.103982  | 0.895706  | 1.104100  |
| H | 8.074201  | -2.065006 | -0.789380 | H                      | 4.888487  | 1.944952  | 1.689816  |
| H | 9.361952  | -2.526744 | 1.271321  | C                      | 1.905858  | 0.290290  | 1.515869  |
| H | 5.781428  | -3.764136 | 3.341166  | H                      | 0.689693  | -0.201646 | 3.218055  |
| H | 8.237686  | -3.361020 | 3.314993  | H                      | 3.369654  | 0.887153  | 0.052781  |
| H | 6.559606  | -0.361825 | -1.803624 | H                      | 1.619863  | -0.963908 | -0.179377 |
| H | -2.617198 | -5.621163 | 3.717813  | H                      | -3.816090 | 6.372051  | -1.989790 |
| H | -4.176652 | -2.895068 | 6.658433  | H                      | -3.873133 | 7.169120  | 2.074677  |
| H | -1.565680 | -3.733578 | 2.511473  | H                      | -4.037940 | 5.448739  | 3.441578  |
| H | -3.121210 | -1.007221 | 5.443211  | H                      | -8.182492 | -1.177724 | -3.527997 |
| H | -1.175658 | -1.333552 | 2.515707  | H                      | -1.198289 | -4.133697 | -6.884301 |
| H | -0.560731 | -5.433365 | 8.814128  | H                      | -4.795798 | 3.594330  | 4.974109  |
| H | 0.944536  | -4.417343 | 6.337389  | H                      | 1.566187  | 4.431111  | 3.684929  |
| H | -0.753719 | -4.075752 | 6.710245  | O                      | 0.898859  | 5.581970  | 2.169693  |
| H | 0.431720  | -6.975587 | 6.336712  | H                      | 0.116037  | 6.147116  | 1.954997  |
| H | -8.283179 | -3.713000 | -3.465613 | H                      | -9.201996 | -3.636379 | -1.972150 |
| H | -6.359665 | -2.582096 | -2.346894 | C                      | -6.609332 | -4.560630 | -1.557056 |
| H | -9.193294 | -1.117850 | -2.079115 | H                      | -6.465959 | -5.069234 | -2.516948 |
| H | 2.208793  | -7.752055 | 0.630004  | H                      | -5.653828 | -4.576737 | -1.021585 |
| H | 2.484421  | -5.240613 | 4.108739  | H                      | -7.326530 | -5.149661 | -0.971718 |
| H | 1.006147  | -5.958265 | -0.570303 | C                      | -7.244186 | -2.410172 | -0.398948 |
| H | 1.272296  | -3.442158 | 2.910870  | H                      | -7.525863 | -1.358820 | -0.511190 |
| H | 0.224318  | -2.190552 | 0.861987  | H                      | -8.006110 | -2.896444 | 0.223540  |
| H | -2.653185 | 9.992257  | 1.809140  | H                      | -6.298031 | -2.439754 | 0.151581  |
| H | -2.533417 | 8.973772  | 3.238322  | H                      | 1.125730  | -5.773865 | 8.449013  |
| H | -4.070289 | 8.226754  | 0.677845  | C                      | 0.669524  | -1.535631 | 6.938522  |
| H | -4.882045 | 4.734001  | 6.318192  | H                      | -0.331559 | -1.457386 | 6.508189  |
| H | -6.002226 | 4.892428  | 4.946896  | H                      | 0.914062  | -0.602345 | 7.449900  |
| H | -4.207841 | 6.614664  | 4.744895  | H                      | 1.399074  | -1.708360 | 6.143530  |
| H | 0.420110  | 2.914951  | 2.111884  | S                      | 0.732977  | -2.868155 | 8.189374  |
| H | -0.331150 | 2.812163  | 3.708548  | H                      | 4.320000  | 1.928862  | 4.115130  |
| H | -1.133299 | 3.722539  | 2.419159  |                        |           |           |           |
| H | -0.071094 | 4.908000  | 5.333810  |                        |           |           |           |
| H | -4.453737 | 4.753374  | -2.325318 | <b>Prod-R-SO-C2-r3</b> |           |           |           |
| H | -4.488984 | 5.397880  | -0.675278 | C                      | 2.685000  | -0.270400 | -6.146000 |
| H | -2.276366 | 2.932483  | -2.618041 | C                      | 1.679193  | -1.420560 | -6.071222 |
| H | 0.301890  | 4.692200  | 0.217143  | O                      | 1.215945  | -1.942566 | -7.087924 |
| H | 0.109508  | 2.610176  | -1.310211 | N                      | 1.303236  | -1.826680 | -4.818332 |
| H | -4.794078 | 8.675926  | 2.226055  | C                      | 0.157600  | -2.721200 | -4.637400 |
| H | -9.837298 | -1.799860 | -3.573904 | C                      | -1.136665 | -1.950159 | -4.970137 |
| H | 3.744703  | -0.776321 | -6.616848 | O                      | -1.261438 | -0.764762 | -4.603513 |
| H | 6.268756  | -0.532456 | -3.522955 | C                      | 0.136899  | -3.237799 | -3.177990 |
| H | 4.057243  | 3.536917  | -3.186938 | C                      | -0.915633 | -4.295139 | -2.922053 |
| H | 2.969633  | -7.415789 | 2.986155  | C                      | -0.659378 | -5.641424 | -3.223710 |
| H | -0.334416 | -7.693198 | 7.762415  | C                      | -2.169753 | -3.955575 | -2.398174 |
| H | 0.384369  | 6.440850  | 4.571951  | C                      | -1.633302 | -6.620536 | -3.017427 |
|   |           |           |           | C                      | -3.146761 | -4.931441 | -2.190816 |



|   |           |           |           |   |           |           |           |
|---|-----------|-----------|-----------|---|-----------|-----------|-----------|
| C | -2.882712 | -6.266904 | -2.502221 | N | -0.674058 | 3.450114  | -1.221604 |
| N | -2.125495 | -2.582771 | -5.632629 | O | 0.407155  | 1.483209  | -4.153868 |
| C | -2.136600 | -3.968600 | -6.174200 | O | 0.254973  | -1.517087 | 2.020965  |
| C | -3.605714 | -4.177145 | -6.561820 | H | 3.342411  | -0.201500 | -5.280124 |
| C | -4.072068 | -2.770852 | -6.968731 | H | 2.126623  | 0.667346  | -6.233005 |
| C | -3.371938 | -1.859496 | -5.954130 | H | 1.131115  | -3.644333 | -2.966202 |
| C | 3.693300  | 2.621400  | -2.724800 | H | -0.015184 | -2.386271 | -2.506857 |
| C | 4.608762  | 1.512863  | -3.260876 | H | 0.313833  | -5.924119 | -3.617745 |
| O | 5.065067  | 1.585422  | -4.407396 | H | -2.378060 | -2.920369 | -2.142139 |
| C | 2.348788  | 2.675769  | -3.479221 | H | -1.413662 | -7.658155 | -3.252236 |
| C | 1.542224  | 1.387704  | -3.455008 | H | -4.110425 | -4.648748 | -1.776823 |
| O | 0.979264  | 1.429327  | -0.004587 | H | -3.640131 | -7.027250 | -2.335496 |
| O | 1.901334  | 0.353875  | -2.907117 | H | 0.282999  | -3.557640 | -5.327333 |
| N | 4.889534  | 0.484043  | -2.413005 | H | -3.716940 | -4.919465 | -7.356128 |
| C | 5.661700  | -0.688600 | -2.821900 | H | -4.169676 | -4.525146 | -5.689683 |
| C | 4.891397  | -2.024615 | -2.793871 | H | -3.727365 | -2.538310 | -7.982423 |
| C | 4.791184  | -2.672465 | -1.442702 | H | -5.158373 | -2.653971 | -6.947213 |
| C | 3.653328  | -2.905199 | -0.704376 | H | -3.136713 | -0.865305 | -6.340224 |
| C | 5.882523  | -3.235389 | -0.681795 | H | -3.968069 | -1.729947 | -5.042516 |
| C | 5.322186  | -3.785756 | 0.508193  | H | -1.794363 | -4.685692 | -5.428792 |
| C | 7.269866  | -3.352450 | -0.891170 | H | 2.518173  | 2.926135  | -4.532366 |
| N | 3.966819  | -3.562275 | 0.466452  | H | 1.713108  | 3.467295  | -3.068406 |
| C | 6.104856  | -4.430405 | 1.474244  | H | 3.506295  | 2.499370  | -1.654021 |
| C | 8.049641  | -3.991824 | 0.066202  | H | 5.422522  | -2.704509 | -3.474833 |
| C | 7.472216  | -4.524106 | 1.238883  | H | 3.894730  | -1.878031 | -3.221361 |
| C | -3.446700 | -4.602200 | 5.115400  | H | 2.622779  | -2.666562 | -0.926526 |
| C | -2.697932 | -4.616872 | 3.935005  | H | 7.729183  | -2.954424 | -1.792078 |
| C | -3.594932 | -3.395902 | 5.807952  | H | 9.120912  | -4.085892 | -0.088750 |
| C | -2.095620 | -3.456258 | 3.447475  | H | 5.654488  | -4.847532 | 2.369932  |
| C | -2.996899 | -2.228209 | 5.336502  | H | 8.106430  | -5.018770 | 1.969155  |
| C | -2.235039 | -2.247976 | 4.154552  | H | 6.554486  | -0.768539 | -2.190628 |
| O | -1.676193 | -1.086765 | 3.744436  | H | -2.577889 | -5.543799 | 3.380072  |
| C | -0.263300 | -7.167200 | 6.751200  | H | -4.179619 | -3.361998 | 6.723754  |
| C | 0.180590  | -6.110774 | 7.768965  | H | -1.526072 | -3.481687 | 2.522571  |
| C | 0.213106  | -4.708324 | 7.157685  | H | -3.106480 | -1.287340 | 5.867787  |
| C | -9.097700 | -1.356500 | -2.780600 | H | -1.005531 | -1.240240 | 3.014742  |
| C | -8.634190 | -2.089185 | -1.516647 | H | -0.501622 | -6.116946 | 8.628193  |
| C | -7.113723 | -2.057480 | -1.264543 | H | 0.922176  | -4.669079 | 6.323643  |
| C | 2.300700  | -6.846900 | 1.982900  | H | -0.774834 | -4.433654 | 6.774701  |
| C | 2.212384  | -5.692366 | 2.766773  | H | 0.417863  | -7.203226 | 5.893914  |
| C | 1.618485  | -6.876754 | 0.759696  | H | -8.953800 | -3.138188 | -1.579187 |
| C | 1.476166  | -4.583448 | 2.341670  | H | -6.621144 | -2.457129 | -2.164656 |
| C | 0.878038  | -5.785143 | 0.322252  | H | -8.891654 | -0.282665 | -2.731599 |
| C | 0.785048  | -4.587844 | 1.091106  | H | 1.669926  | -7.768042 | 0.136581  |
| O | 0.102636  | -3.561127 | 0.650629  | H | 2.726664  | -5.649297 | 3.725491  |
| C | -3.627500 | 8.183700  | 2.248300  | H | 0.352670  | -5.816599 | -0.627638 |
| C | -2.308873 | 8.862399  | 2.621000  | H | 1.411153  | -3.692062 | 2.958915  |
| C | -1.074582 | 8.195395  | 1.992355  | H | 0.198065  | -2.397327 | 1.424477  |
| O | -1.130704 | 6.897499  | 1.936756  | H | -2.311250 | 9.921645  | 2.345192  |
| O | -0.122001 | 8.890608  | 1.619925  | H | -2.171853 | 8.821358  | 3.711297  |
| C | -3.674700 | 5.400800  | 4.878700  | H | -3.819053 | 8.262817  | 1.171799  |
| C | -2.220251 | 5.091932  | 5.282843  | H | -4.516537 | 4.518933  | 6.674465  |
| O | -1.968305 | 4.520545  | 6.350926  | H | -5.690570 | 4.731324  | 5.355966  |
| C | -4.656200 | 4.463300  | 5.593100  | H | -3.886007 | 6.445286  | 5.141928  |
| N | -1.261487 | 5.490511  | 4.410593  | H | 0.633254  | 2.861515  | 2.096506  |
| C | 0.160400  | 5.219900  | 4.621800  | H | -0.052900 | 2.602793  | 3.710729  |
| C | 0.857290  | 4.555606  | 3.422458  | H | -0.901363 | 3.629639  | 2.542559  |
| C | 0.086716  | 3.338444  | 2.911558  | H | 0.224725  | 4.568197  | 5.496164  |
| C | -3.810200 | 5.499300  | -1.250000 | H | -4.437424 | 4.947988  | -1.954963 |
| C | -2.485882 | 4.816007  | -1.101756 | H | -4.346400 | 5.556588  | -0.295570 |
| C | -1.952737 | 3.691657  | -1.693090 | H | -2.414970 | 3.047757  | -2.429074 |
| N | -1.494734 | 5.271088  | -0.253262 | H | 0.450034  | 4.554666  | 0.242321  |
| C | -0.440846 | 4.426672  | -0.356659 | H | 0.379447  | 2.007489  | -0.526777 |

|   |            |           |           |   |           |           |           |
|---|------------|-----------|-----------|---|-----------|-----------|-----------|
| H | -4.475781  | 8.643189  | 2.768252  | H | 1.718892  | -1.040913 | 0.650996  |
| H | -10.176091 | -1.476090 | -2.930262 | H | -3.701295 | 6.523592  | -1.625798 |
| H | 3.280681   | -0.392789 | -7.051976 | H | -3.602921 | 7.123334  | 2.498730  |
| H | 5.995956   | -0.473576 | -3.838821 | H | -3.779707 | 5.324533  | 3.791791  |
| H | 4.211673   | 3.572325  | -2.873033 | H | -8.594043 | -1.749864 | -3.671573 |
| H | 2.880351   | -7.702180 | 2.317807  | H | -1.478019 | -4.025209 | -7.049811 |
| H | -0.285889  | -8.163790 | 7.204053  | H | 1.833079  | 4.213816  | 3.794431  |
| H | 0.692631   | 6.151474  | 4.857657  | H | -4.495561 | 3.424118  | 5.290931  |
| H | -3.914730  | -5.510448 | 5.483351  | O | 1.162454  | 5.481340  | 2.380868  |
| H | -1.527747  | 6.028274  | 0.448461  | H | 0.361622  | 6.022920  | 2.173554  |
| H | -0.077690  | 0.617002  | -4.163230 | H | -9.146901 | -1.668352 | -0.639496 |
| H | -1.265395  | -6.947495 | 6.367682  | C | -6.743786 | -2.967837 | -0.084396 |
| H | -1.507581  | 5.990300  | 3.551405  | H | -5.661451 | -2.983455 | 0.083088  |
| H | 1.542375   | -1.222725 | -4.032669 | H | -7.215136 | -2.617178 | 0.842185  |
| H | 4.342225   | 0.414023  | -1.566573 | H | -7.073757 | -3.998807 | -0.255020 |
| H | 3.284260   | -3.897255 | 1.140460  | C | -6.585865 | -0.633924 | -1.032090 |
| C | 0.195763   | 0.459615  | 0.666504  | H | -6.772165 | 0.020341  | -1.889237 |
| C | 1.090692   | -0.551454 | 1.409904  | H | -7.064406 | -0.180723 | -0.154770 |
| H | -0.420039  | -0.121236 | -0.037943 | H | -5.505721 | -0.641850 | -0.851992 |
| H | -0.485724  | 0.918410  | 1.399634  | H | 1.174681  | -6.364412 | 8.157476  |
| C | 3.768841   | 1.275903  | 4.298011  | C | 0.624432  | -1.940517 | 7.403146  |
| C | 2.606845   | 0.631813  | 4.727493  | H | 0.851391  | -1.100628 | 8.063066  |
| C | 4.060252   | 1.323840  | 2.932182  | H | 1.355959  | -1.964879 | 6.591843  |
| C | 1.743023   | 0.040690  | 3.801604  | H | -0.378369 | -1.810901 | 6.989444  |
| H | 2.370655   | 0.586849  | 5.787418  | S | 0.714916  | -3.460993 | 8.414765  |
| C | 3.195772   | 0.732420  | 2.010415  | H | 4.442621  | 1.731137  | 5.018663  |
| H | 4.964378   | 1.816621  | 2.584746  |   |           |           |           |
| C | 2.023372   | 0.088686  | 2.430092  |   |           |           |           |
| H | 0.843072   | -0.460543 | 4.139615  |   |           |           |           |
| H | 3.424556   | 0.775540  | 0.950476  |   |           |           |           |
